# Supplementary material for: Optics miniaturization strategy for demanding Raman spectroscopy applications
Source: Research Square preprint supplement (doi:10.21203/rs.3.rs-3186206/v1), 2023-08-16
Supplement: Supplementary file 1 [file Data S5 Raman spectra of human skin.xlsx]

## Sheet: Face 660 nm
2794.61	20.4693	18.4229	17.6053	16.4106	15.854	15.9981	16.0984	18.8982	27.5364	21.1735	21.2478	23.157	20.8164	18.5456	32.1644	28.2089	32.4594	35.2927	34.5078
2796.5	20.4599	18.3655	17.5834	16.4118	15.8441	15.9896	16.0914	18.896	27.5223	21.1748	21.2597	23.1688	20.8142	18.5337	32.144	28.2088	32.4554	35.3137	34.5039
2798.39	20.4495	18.3445	17.5587	16.4183	15.8369	15.9674	16.0661	18.8978	27.4911	21.1715	21.2705	23.1688	20.8018	18.5222	32.1529	28.2067	32.4745	35.3026	34.4853
2800.29	20.4541	18.3457	17.5541	16.4301	15.8241	15.9595	16.0454	18.8955	27.4744	21.1671	21.2728	23.1634	20.7957	18.5155	32.1823	28.2037	32.5172	35.2676	34.4528
2802.18	20.4539	18.3446	17.5725	16.4515	15.8139	15.9702	16.0377	18.8915	27.4863	21.1496	21.2651	23.1587	20.8037	18.5111	32.193	28.1886	32.5445	35.2352	34.4317
2804.07	20.4454	18.3552	17.5952	16.474	15.8448	15.9839	16.0361	18.8902	27.5092	21.1217	21.2511	23.147	20.814	18.5032	32.2069	28.1812	32.5639	35.2514	34.4348
2805.96	20.4507	18.3808	17.6098	16.4821	15.9083	15.9925	16.0325	18.8913	27.52	21.1017	21.2367	23.1599	20.8086	18.5161	32.245	28.1942	32.5917	35.31	34.4183
2807.85	20.4637	18.4059	17.6124	16.4842	15.9454	15.9936	16.0646	18.8911	27.5359	21.1713	21.2404	23.1956	20.8343	18.5492	32.2644	28.2024	32.5963	35.3393	34.4498
2809.74	20.4708	18.4159	17.6098	16.4899	15.9565	15.9898	16.1283	18.903	27.5629	21.3118	21.2615	23.2043	20.8963	18.5673	32.2541	28.1918	32.5817	35.3394	34.5605
2811.63	20.4722	18.4075	17.6057	16.4936	15.9669	15.9823	16.1562	18.9277	27.5677	21.3924	21.2738	23.1966	20.9226	18.5728	32.2411	28.1748	32.5735	35.3429	34.616
2813.52	20.4696	18.3938	17.6392	16.5157	15.9697	15.9951	16.1517	18.9455	27.5607	21.3844	21.2905	23.1946	20.9136	18.5805	32.23	28.1554	32.5653	35.3278	34.598
2815.41	20.4681	18.3881	17.7017	16.554	15.9879	16.0257	16.148	18.9605	27.5609	21.3479	21.3179	23.1845	20.9074	18.5847	32.2639	28.1939	32.5834	35.3292	34.5816
2817.29	20.4741	18.4202	17.7415	16.578	16.0279	16.0442	16.136	18.9795	27.5506	21.3172	21.328	23.2017	20.9029	18.6129	32.3427	28.2919	32.633	35.3682	34.5762
2819.18	20.5176	18.4758	17.7776	16.619	16.0637	16.0753	16.1648	18.9886	27.5728	21.326	21.3243	23.2447	20.9372	18.6613	32.3932	28.3576	32.6641	35.3912	34.6029
2821.07	20.5827	18.517	17.8263	16.6842	16.0973	16.1268	16.2404	19.0311	27.6317	21.3665	21.3256	23.2649	21.0078	18.6898	32.4096	28.3744	32.697	35.424	34.6603
2822.95	20.63	18.5733	17.8662	16.7381	16.1371	16.1705	16.299	19.1078	27.6647	21.3948	21.3322	23.2812	21.0568	18.7215	32.4246	28.3834	32.7477	35.487	34.6969
2824.84	20.6852	18.6456	17.9021	16.7877	16.1757	16.2162	16.3536	19.1618	27.6839	21.4404	21.3842	23.3134	21.0962	18.7669	32.4414	28.401	32.7707	35.5267	34.6951
2826.72	20.7506	18.6971	17.9463	16.842	16.2294	16.2708	16.4194	19.2161	27.7135	21.5099	21.4695	23.3481	21.1426	18.7993	32.4725	28.4481	32.7614	35.546	34.6824
2828.61	20.7978	18.7508	18.0011	16.8904	16.2963	16.3224	16.4628	19.284	27.7363	21.5534	21.5199	23.3969	21.1727	18.8378	32.5209	28.5162	32.7528	35.5719	34.6807
2830.49	20.8595	18.8149	18.0853	16.9401	16.3502	16.3805	16.5069	19.3303	27.7753	21.5759	21.5431	23.4548	21.1887	18.891	32.5663	28.5622	32.7636	35.5963	34.7566
2832.37	20.9386	18.8718	18.1835	16.9949	16.4159	16.4465	16.5663	19.3776	27.8321	21.6023	21.569	23.4945	21.2063	18.943	32.6356	28.6032	32.8435	35.6682	34.8942
2834.25	21.0115	18.9719	18.2593	17.0485	16.4944	16.5097	16.6156	19.4384	27.8686	21.635	21.5964	23.5687	21.2296	19.0173	32.7256	28.6541	32.9719	35.7796	34.9831
2836.14	21.106	19.0916	18.3278	17.128	16.5501	16.5788	16.6974	19.491	27.9346	21.7078	21.666	23.666	21.2997	19.0987	32.7817	28.6903	33.0574	35.8472	35.0181
2838.02	21.2074	19.1643	18.4006	17.2225	16.6162	16.6556	16.8092	19.563	28.0312	21.8067	21.7629	23.7203	21.4008	19.1409	32.8245	28.739	33.1247	35.8746	35.0446
2839.9	21.2772	19.2167	18.4692	17.2951	16.6979	16.7319	16.8921	19.6523	28.095	21.8769	21.8213	23.7705	21.4694	19.1728	32.8736	28.8079	33.1961	35.8978	35.071
2841.78	21.3455	19.2683	18.5723	17.3706	16.7596	16.8269	16.9712	19.7228	28.1419	21.9431	21.8719	23.8307	21.5265	19.2097	32.9085	28.8637	33.2344	35.9246	35.1369
2843.66	21.4123	19.313	18.6856	17.4498	16.8327	16.9238	17.0531	19.8038	28.1902	22.0136	21.9328	23.8735	21.5879	19.2386	32.9133	28.8922	33.1941	35.9622	35.2333
2845.54	21.4556	19.4131	18.7502	17.5072	16.9202	16.9863	17.1014	19.8912	28.2267	22.0573	21.9779	23.9051	21.6328	19.2769	32.9037	28.9103	33.118	36.0071	35.2948
2847.41	21.5205	19.5327	18.7826	17.5735	16.989	17.0393	17.1278	19.9434	28.2524	22.0785	22.0263	23.9384	21.6771	19.3239	32.9064	28.9408	33.0961	36.0455	35.3604
2849.29	21.5939	19.5981	18.8124	17.6478	17.0691	17.0942	17.1503	19.9834	28.2756	22.0955	22.0784	23.9804	21.7297	19.3661	32.9738	29.0284	33.2181	36.1101	35.4439
2851.17	21.641	19.6483	18.8532	17.7047	17.1544	17.1422	17.1719	20.0295	28.3017	22.1198	22.1092	24.0839	21.7826	19.4573	33.0792	29.1513	33.4171	36.1951	35.4937
2853.04	21.7063	19.6997	18.9254	17.7701	17.2068	17.2034	17.2324	20.08	28.3508	22.184	22.1433	24.2123	21.879	19.5706	33.1405	29.2423	33.5412	36.2553	35.5306
2854.92	21.7798	19.74	19.0096	17.8416	17.2754	17.2704	17.3232	20.1894	28.416	22.2718	22.1905	24.2931	21.999	19.6405	33.2331	29.3324	33.6375	36.3532	35.5774
2856.8	21.8293	19.7824	19.0767	17.8992	17.3597	17.3236	17.4066	20.3262	28.4768	22.3407	22.2419	24.3447	22.0829	19.6879	33.3628	29.4248	33.7381	36.4808	35.6269
2858.67	21.8909	19.8323	19.183	17.9801	17.4216	17.409	17.5248	20.416	28.5928	22.4227	22.3649	24.3936	22.1549	19.7377	33.4478	29.4751	33.8003	36.5575	35.715
2860.54	21.9588	19.8947	19.3019	18.0753	17.529	17.5125	17.663	20.4878	28.7267	22.5196	22.5229	24.4583	22.2328	19.8033	33.5287	29.4964	33.8322	36.6018	35.8302
2862.42	22.0178	20.0193	19.375	18.1565	17.6656	17.5968	17.7667	20.5593	28.7858	22.6052	22.6228	24.6057	22.3143	19.9183	33.6231	29.518	33.8606	36.647	35.9217
2864.29	22.1304	20.1606	19.476	18.2588	17.7692	17.7169	17.8611	20.625	28.8014	22.7108	22.6934	24.7746	22.4569	20.0522	33.7049	29.5633	33.9094	36.7071	36.0139
2866.16	22.2608	20.2567	19.5835	18.3704	17.8754	17.8407	17.948	20.7278	28.8154	22.8199	22.7644	24.8761	22.6171	20.1624	33.8314	29.7069	34.0407	36.8297	36.1113
2868.03	22.3563	20.3526	19.6399	18.4599	17.9755	17.9064	18.0086	20.849	28.8528	22.889	22.844	24.9859	22.7077	20.2886	33.9724	29.8953	34.2023	36.9749	36.191
2869.91	22.454	20.4372	19.7064	18.5395	18.0332	17.962	18.0919	20.9461	28.9723	22.9335	22.9646	25.0889	22.7678	20.4037	34.0472	30.0152	34.2914	37.0624	36.2947
2871.78	22.538	20.4819	19.7747	18.6148	18.0806	18.0175	18.1798	21.0404	29.1137	22.9675	23.0837	25.1418	22.8202	20.4645	34.1221	30.1166	34.3629	37.1353	36.4033
2873.65	22.579	20.5221	19.8116	18.6868	18.126	18.066	18.2291	21.1279	29.1813	22.9996	23.135	25.2175	22.8657	20.5187	34.204	30.2108	34.4338	37.2061	36.4512
2875.52	22.5997	20.5583	19.8576	18.7711	18.1678	18.1492	18.2972	21.1921	29.2252	23.0697	23.1516	25.2959	22.9473	20.5659	34.2453	30.2631	34.4751	37.2525	36.4238
2877.39	22.6148	20.5848	19.9051	18.847	18.2455	18.2407	18.3705	21.2569	29.267	23.1463	23.1616	25.335	23.0322	20.6005	34.2535	30.3058	34.5096	37.2981	36.3796
2879.25	22.6341	20.6297	19.9374	18.8916	18.3248	18.3037	18.4057	21.3123	29.3004	23.1754	23.1751	25.3681	23.0656	20.6776	34.2584	30.3509	34.5473	37.3451	36.391
2881.12	22.6641	20.6755	19.992	18.9363	18.3522	18.3714	18.4345	21.3349	29.3407	23.1721	23.19	25.3974	23.078	20.7561	34.275	30.3868	34.5742	37.3722	36.4451
2882.99	22.6942	20.7021	20.0467	18.9766	18.3499	18.4343	18.4603	21.3319	29.3841	23.1677	23.2079	25.4108	23.087	20.7747	34.254	30.3952	34.5503	37.353	36.5069
2884.86	22.7171	20.7331	20.069	18.9989	18.3483	18.4744	18.4693	21.328	29.4092	23.1834	23.2262	25.4059	23.0877	20.7424	34.2267	30.3943	34.517	37.3244	36.5475
2886.72	22.7471	20.7676	20.0787	19.0138	18.371	18.5128	18.463	21.344	29.3837	23.2013	23.2214	25.4048	23.0552	20.7067	34.2497	30.4081	34.5244	37.3319	36.5494
2888.59	22.779	20.8016	20.0927	19.027	18.4154	18.5462	18.4574	21.3654	29.354	23.2213	23.216	25.4164	23.0175	20.6999	34.2831	30.4157	34.5056	37.3352	36.5351
2890.45	22.8069	20.8445	20.1269	19.0359	18.4603	18.5639	18.4617	21.3876	29.366	23.2479	23.2347	25.4032	23.0119	20.6893	34.312	30.4225	34.4807	37.3376	36.5259
2892.32	22.838	20.8899	20.1907	19.0287	18.4822	18.5671	18.4541	21.4103	29.3647	23.2679	23.2462	25.3939	23.0245	20.6908	34.3286	30.4401	34.5009	37.3619	36.5009
2894.18	22.8725	20.9376	20.2576	19.0267	18.4809	18.5707	18.4513	21.4304	29.3648	23.2875	23.2593	25.4176	23.047	20.7293	34.3048	30.4499	34.5399	37.3936	36.4831
2896.04	22.91	21.006	20.3072	19.0564	18.4836	18.5865	18.4955	21.4535	29.4028	23.3188	23.2902	25.4519	23.0881	20.7969	34.2831	30.4666	34.5844	37.4288	36.5038
2897.91	22.9516	21.0714	20.3625	19.1175	18.5301	18.6056	18.6113	21.4942	29.4687	23.3622	23.3244	25.4898	23.1671	20.8641	34.3122	30.4952	34.627	37.4525	36.541
2899.77	22.9929	21.1153	20.4209	19.1849	18.6369	18.6325	18.7314	21.5662	29.5349	23.4093	23.3629	25.5252	23.2489	20.9111	34.3661	30.4988	34.6575	37.4382	36.5879
2901.63	23.0396	21.1579	20.4831	19.2574	18.751	18.696	18.8014	21.6433	29.5729	23.4505	23.4123	25.5573	23.301	20.9553	34.4229	30.5062	34.6948	37.429	36.6476
2903.49	23.1102	21.2006	20.566	19.3745	18.833	18.8263	18.8715	21.7082	29.5859	23.4886	23.4743	25.598	23.3504	21.0015	34.4992	30.5524	34.7563	37.488	36.7153
2905.35	23.1807	21.2513	20.6535	19.4853	18.9185	18.9457	18.941	21.7883	29.6033	23.53	23.5434	25.687	23.404	21.075	34.6334	30.6187	34.8314	37.6139	36.7812
2907.21	23.257	21.3273	20.743	19.5567	18.9979	18.9989	19.0188	21.879	29.6654	23.6102	23.6344	25.8466	23.4829	21.1949	34.7691	30.6885	34.9096	37.7395	36.8367
2909.07	23.3909	21.4101	20.8629	19.6378	19.0891	19.0443	19.1409	21.9946	29.7765	23.7606	23.7662	25.9988	23.6173	21.2999	34.8821	30.7945	35.0219	37.8451	36.8875
2910.93	23.5314	21.523	20.995	19.7254	19.2395	19.0961	19.2673	22.1598	29.8742	23.9061	23.8858	26.1215	23.7634	21.3681	35.0277	30.9743	35.2028	37.9823	36.9361
2912.79	23.6622	21.7128	21.1388	19.8347	19.3905	19.1873	19.3816	22.3166	29.9631	24.0092	23.9615	26.2665	23.9065	21.4474	35.1654	31.1457	35.3816	38.1009	37.0429
2914.65	23.8219	21.88	21.3152	19.9911	19.5113	19.3467	19.5189	22.4279	30.1143	24.1214	24.0326	26.3867	24.0766	21.5251	35.2706	31.2826	35.5222	38.183	37.2457
2916.5	23.9549	21.9784	21.4864	20.1433	19.6419	19.5139	19.6529	22.5312	30.2513	24.2168	24.101	26.4924	24.2269	21.6292	35.3795	31.4407	35.6639	38.2821	37.4229
2918.36	24.0531	22.0798	21.6417	20.2771	19.7607	19.661	19.7869	22.6337	30.3396	24.2869	24.1976	26.6289	24.3428	21.7814	35.4746	31.56	35.7731	38.3693	37.5432
2920.21	24.1704	22.1708	21.7938	20.4239	19.8752	19.813	19.9387	22.7895	30.4362	24.3609	24.3396	26.7431	24.4593	21.9142	35.582	31.607	35.8643	38.4609	37.6777
2922.07	24.2639	22.2755	21.8949	20.5438	20.0062	19.937	20.0508	23.0035	30.5226	24.4215	24.4562	26.8558	24.548	22.0406	35.7223	31.6372	35.9744	38.5924	37.7595
2923.92	24.3381	22.4167	21.9343	20.6245	20.1017	20.0313	20.1102	23.1407	30.6097	24.5008	24.527	27.0012	24.6381	22.1922	35.8159	31.67	36.0426	38.699	37.7829
2925.78	24.43	22.5215	21.9567	20.6956	20.1749	20.1212	20.1616	23.1559	30.7132	24.6178	24.5967	27.1153	24.7596	22.2966	35.8541	31.7682	36.0659	38.7901	37.805
2927.63	24.4949	22.5751	21.9665	20.7526	20.2655	20.1833	20.2008	23.1439	30.7841	24.6972	24.6586	27.1794	24.8369	22.3533	35.8862	31.9256	36.0857	38.8909	37.7995
2929.49	24.5264	22.6231	21.977	20.8086	20.3242	20.2359	20.2592	23.1365	30.825	24.7162	24.7229	27.2214	24.8624	22.4006	35.8907	32.0238	36.0807	38.9278	37.7903
2931.34	24.5526	22.6471	21.9905	20.8637	20.3382	20.2982	20.3351	23.175	30.8576	24.712	24.7885	27.2438	24.8801	22.4227	35.8891	32.0442	36.0569	38.8668	37.8009
2933.19	24.5578	22.6446	21.9869	20.8822	20.3343	20.3279	20.3592	23.2439	30.8543	24.6902	24.8177	27.2648	24.8762	22.4374	35.8973	32.0415	36.0367	38.7627	37.7875
2935.04	24.5163	22.6318	21.9262	20.8449	20.3141	20.3217	20.3113	23.2717	30.777	24.6291	24.8115	27.2797	24.8542	22.4496	35.8807	32.018	36.0155	38.6742	37.7698
2936.89	24.4357	22.6124	21.8217	20.7791	20.2564	20.3049	20.2309	23.2467	30.6577	24.5397	24.7887	27.2641	24.8241	22.4358	35.8169	31.9634	36.021	38.6235	37.7653
2938.74	24.3534	22.5706	21.735	20.7198	20.1657	20.278	20.1502	23.2001	30.5704	24.4684	24.7495	27.2045	24.7823	22.3725	35.7277	31.8939	36.0428	38.5875	37.7437
2940.59	24.2536	22.5036	21.64	20.6459	20.0771	20.2236	20.0397	23.1419	30.5145	24.4065	24.6548	27.1182	24.6976	22.2811	35.651	31.8437	36.0311	38.5425	37.671
2942.44	24.1261	22.4317	21.5125	20.5456	19.9596	20.1437	19.9018	23.0169	30.4565	24.3342	24.5175	27.0272	24.5808	22.1988	35.5351	31.7767	35.9316	38.4608	37.5572
2944.29	24.0087	22.3088	21.3934	20.452	19.8096	20.0617	19.7877	22.8374	30.3954	24.2628	24.3974	26.8576	24.479	22.0894	35.3774	31.6776	35.7738	38.3508	37.4387
2946.14	23.8649	22.1333	21.2514	20.3308	19.6734	19.9462	19.6904	22.68	30.2802	24.156	24.2774	26.6338	24.3756	21.9517	35.245	31.5782	35.6305	38.247	37.2267
2947.99	23.689	21.9662	21.0797	20.1785	19.5442	19.8012	19.5878	22.5422	30.1125	24.0144	24.1446	26.4414	24.2566	21.8189	35.0698	31.4163	35.435	38.0442	36.9523
2949.83	23.5335	21.8006	20.9197	20.0389	19.4029	19.6733	19.4795	22.4035	29.9396	23.8762	24.0225	26.2479	24.1375	21.6486	34.8518	31.2066	35.2019	37.7789	36.748
2951.68	23.3776	21.6326	20.7555	19.8849	19.2496	19.5448	19.3223	22.2711	29.6952	23.7086	23.8796	26.056	23.9927	21.4613	34.6708	31.0318	35.0313	37.5978	36.613
2953.52	23.2151	21.4908	20.5919	19.7184	19.0546	19.4067	19.1323	22.1144	29.4305	23.5183	23.7224	25.9048	23.827	21.3111	34.5063	30.8545	34.8823	37.4691	36.4983
2955.37	23.0775	21.3532	20.462	19.5779	18.8467	19.2763	18.9607	21.9461	29.2756	23.349	23.5895	25.7574	23.6703	21.178	34.3479	30.6736	34.7299	37.3443	36.3777
2957.21	22.9549	21.217	20.3546	19.4444	18.6833	19.1103	18.7827	21.8043	29.2114	23.168	23.4571	25.6158	23.4922	21.0529	34.2165	30.532	34.5921	37.2174	36.2188
2959.06	22.8354	21.1006	20.2538	19.3118	18.554	18.9277	18.6092	21.6701	29.1686	23.0006	23.3275	25.4951	23.3159	20.9377	34.0645	30.3559	34.3695	37.0265	36.0478
2960.9	22.719	20.967	20.1537	19.1932	18.4452	18.7818	18.479	21.5398	29.0978	22.9069	23.2237	25.3323	23.1926	20.7955	33.9099	30.1765	34.1347	36.8184	35.9096
2962.74	22.5843	20.8243	20.0212	19.0673	18.3571	18.6563	18.3664	21.4267	28.9565	22.8599	23.1027	25.1789	23.0815	20.6644	33.8013	30.0743	34.0313	36.678	35.782
2964.59	22.4465	20.704	19.882	18.9412	18.2644	18.541	18.2697	21.3181	28.7982	22.8234	22.9797	25.101	22.9768	20.5915	33.6961	29.9777	34.0066	36.547	35.6604
2966.43	22.3333	20.5822	19.7771	18.8343	18.1717	18.4404	18.2039	21.2102	28.6954	22.7731	22.8913	25.0346	22.8955	20.5356	33.5942	29.8872	33.9988	36.429	35.5496
2968.27	22.2349	20.462	19.6754	18.7276	18.0913	18.34	18.1483	21.0996	28.6186	22.6879	22.7932	24.9711	22.8116	20.482	33.5138	29.8372	33.9691	36.356	35.4079
2970.11	22.1449	20.3596	19.5825	18.6248	17.9965	18.2465	18.0927	20.9492	28.545	22.59	22.6948	24.9132	22.7236	20.4177	33.416	29.7726	33.8762	36.2694	35.2666
2971.95	22.0618	20.2527	19.5169	18.5359	17.8953	18.1724	18.0304	20.8139	28.4601	22.5056	22.6196	24.8248	22.6366	20.3059	33.314	29.6938	33.7659	36.1799	35.1713
2973.79	21.9706	20.1515	19.4439	18.4396	17.8045	18.1036	17.942	20.759	28.3235	22.4148	22.5301	24.7247	22.5287	20.1894	33.2235	29.6118	33.6828	36.1023	35.0925
2975.63	21.8819	20.0724	19.3714	18.3457	17.7128	18.0342	17.8467	20.728	28.1755	22.3223	22.4364	24.6212	22.4178	20.0969	33.0993	29.4927	33.5674	35.9588	35.0222
2977.47	21.8035	19.9928	19.3059	18.2691	17.6208	17.9583	17.7608	20.6942	28.0571	22.2321	22.3542	24.4789	22.322	19.9798	32.9881	29.3704	33.4528	35.7979	34.9392
2979.31	21.6955	19.9142	19.1907	18.1923	17.5326	17.8534	17.6538	20.6378	27.9273	22.1181	22.2582	24.3471	22.2146	19.8724	32.9261	29.2645	33.3755	35.66	34.7915
2981.14	21.5861	19.8435	19.0678	18.112	17.4443	17.736	17.5481	20.5269	27.8119	22.013	22.1686	24.2525	22.1163	19.7819	32.8349	29.114	33.2854	35.4764	34.6589
2982.98	21.5033	19.7721	18.9814	18.0248	17.3552	17.6194	17.4582	20.3989	27.7229	21.9345	22.0993	24.1483	22.0377	19.6503	32.7409	28.9796	33.1943	35.3274	34.6101
2984.82	21.4024	19.6915	18.8891	17.9208	17.2571	17.485	17.3459	20.2706	27.6042	21.8333	22.0161	24.0639	21.9378	19.541	32.6597	28.907	33.111	35.2838	34.5709
2986.65	21.2993	19.5891	18.7909	17.8181	17.1377	17.3595	17.2375	20.0957	27.5116	21.7493	21.9344	24.0114	21.8483	19.4893	32.5357	28.8232	33.0066	35.2603	34.518
2988.49	21.2083	19.4534	18.6751	17.7208	17.0266	17.251	17.1553	19.9525	27.4934	21.7095	21.8627	23.9493	21.7905	19.4411	32.4153	28.7356	32.9084	35.2205	34.4098
2990.32	21.0997	19.3146	18.5101	17.6	16.9413	17.1175	17.0743	19.8967	27.4933	21.6606	21.775	23.8748	21.7224	19.3913	32.3188	28.6427	32.8201	35.1164	34.2225
2992.16	20.9859	19.1836	18.3671	17.4901	16.852	17.0124	16.996	19.8548	27.4772	21.6033	21.6857	23.7449	21.6485	19.3152	32.2033	28.5254	32.7101	34.9363	34.046
2993.99	20.8619	19.0313	18.2869	17.4103	16.7633	16.9751	16.9011	19.8088	27.3805	21.5122	21.5924	23.5495	21.54	19.2008	32.0995	28.4219	32.6121	34.7703	33.9235
2995.82	20.6991	18.9128	18.2039	17.3254	16.665	16.9553	16.774	19.7159	27.1868	21.3632	21.4781	23.4045	21.3711	19.0959	32.0064	28.3352	32.5309	34.654	33.8084
2997.66	20.5645	18.859	18.1239	17.2453	16.5437	16.9231	16.6724	19.5559	27.023	21.2301	21.3762	23.3331	21.2338	19.0031	31.8897	28.2346	32.4331	34.5345	33.7137
2999.49	20.4966	18.8142	18.0261	17.1414	16.4387	16.8177	16.6051	19.4223	26.9438	21.1331	21.2999	23.2573	21.1561	18.8978	31.7769	28.1526	32.3369	34.4265	33.6461
3001.32	20.4397	18.7657	17.8881	16.9819	16.3577	16.6276	16.5247	19.3524	26.8735	21.0252	21.2267	23.1874	21.0719	18.8129	31.6694	28.0809	32.2269	34.3431	33.5821
3003.15	20.3863	18.6752	17.7773	16.8496	16.2711	16.475	16.4547	19.2847	26.8101	20.9352	21.1595	23.0897	20.9953	18.7324	31.5513	27.9901	32.0917	34.2706	33.5005
3004.98	20.3133	18.5286	17.7124	16.7677	16.1933	16.4035	16.382	19.214	26.7285	20.8692	21.0835	22.9592	20.9022	18.6349	31.44	27.9026	31.9734	34.1932	33.3939
3006.81	20.2089	18.4088	17.6455	16.6827	16.1122	16.3365	16.2899	19.1147	26.6197	20.8064	20.9936	22.8516	20.781	18.5468	31.3391	27.7996	31.8924	34.1068	33.2793
3008.64	20.117	18.3408	17.5852	16.6122	16.0192	16.2743	16.2134	18.9882	26.5221	20.7466	20.9167	22.7691	20.6843	18.4498	31.24	27.6763	31.8242	34.0182	33.1725
3010.47	20.0506	18.2736	17.5145	16.5454	15.9434	16.1893	16.1462	18.8834	26.4435	20.6906	20.8564	22.6889	20.6213	18.3447	31.1416	27.5725	31.7436	33.9294	33.1127
3012.29	19.9835	18.2169	17.4271	16.4692	15.8941	16.0797	16.0721	18.7982	26.3664	20.6341	20.796	22.6135	20.5644	18.2694	31.0485	27.4856	31.6458	33.857	33.0802
3014.12	19.9226	18.1621	17.3568	16.4069	15.8517	15.9968	16.0064	18.7136	26.2873	20.5713	20.7291	22.5307	20.5064	18.2289	30.9622	27.4028	31.5491	33.798	33.02
3015.95	19.8645	18.0999	17.3233	16.3664	15.8005	15.954	15.9385	18.6437	26.2156	20.4832	20.6451	22.4488	20.4385	18.2	30.88	27.3318	31.4711	33.7338	32.8923
3017.77	19.8051	18.0434	17.3071	16.3323	15.7237	15.9211	15.8694	18.5977	26.1529	20.3875	20.5601	22.3855	20.3655	18.1637	30.7925	27.2443	31.382	33.6256	32.7492
3019.6	19.753	18.0067	17.2826	16.2922	15.64	15.8781	15.8184	18.565	26.092	20.3223	20.5015	22.332	20.2985	18.1064	30.7106	27.1505	31.2882	33.5046	32.6653
3021.43	19.7188	17.9818	17.2447	16.2505	15.5816	15.8359	15.7799	18.5305	26.0424	20.2855	20.4799	22.2834	20.2249	18.0476	30.6545	27.0846	31.2232	33.4312	32.6669
3023.25	19.6934	17.9506	17.2063	16.2132	15.5288	15.8017	15.7469	18.4994	26.0053	20.2596	20.4733	22.2408	20.1538	18.0137	30.6828	27.0482	31.2091	33.4542	32.6909
3025.07	19.6592	17.9189	17.1758	16.1775	15.4804	15.765	15.7206	18.4749	25.9756	20.2379	20.456	22.1954	20.1097	18.017	30.7357	27.023	31.2119	33.5017	32.6682
3026.9	19.644	17.8907	17.1543	16.1293	15.4597	15.698	15.7063	18.4541	26.0094	20.2696	20.4288	22.1534	20.1147	18.0223	30.7206	26.9954	31.1899	33.4801	32.634
3028.72	19.6466	17.8592	17.1367	16.0821	15.5036	15.6249	15.6983	18.4767	26.0598	20.3143	20.3983	22.1253	20.1357	17.9911	30.659	26.9682	31.1594	33.4133	32.6041
3030.54	19.6337	17.8388	17.1177	16.0605	15.5631	15.5895	15.6901	18.5093	26.0452	20.3033	20.3666	22.1092	20.1302	17.9186	30.5964	26.9441	31.1309	33.3445	32.5703
3032.37	19.6009	17.8278	17.1024	16.0743	15.5706	15.5969	15.6922	18.4965	25.9756	20.2613	20.332	22.0957	20.1113	17.8502	30.5617	26.921	31.0966	33.2978	32.5173
3034.19	19.568	17.8161	17.0903	16.0953	15.5398	15.6132	15.697	18.4547	25.9031	20.2217	20.2998	22.0819	20.093	17.8292	30.5484	26.8912	31.019	33.2579	32.4674
3036.01	19.5542	17.8394	17.0806	16.0959	15.5066	15.6087	15.6906	18.4125	25.8665	20.2079	20.2782	22.0835	20.0835	17.8553	30.5421	26.8644	30.9445	33.2266	32.4424
3037.83	19.5951	17.8694	17.096	16.1033	15.4968	15.6024	15.6703	18.3901	25.8423	20.2376	20.2735	22.0884	20.0982	17.887	30.5295	26.847	30.9267	33.2044	32.4205
3039.65	19.6482	17.8584	17.1191	16.1108	15.5054	15.5986	15.6489	18.3953	25.8274	20.2733	20.2745	22.0843	20.1156	17.8952	30.5041	26.8215	30.9442	33.1627	32.4056
3041.47	19.6573	17.8234	17.1291	16.1008	15.5179	15.5946	15.6427	18.4071	25.8228	20.2711	20.2705	22.0752	20.1027	17.8979	30.4821	26.8036	30.9666	33.123	32.3929
3043.29	19.6456	17.7932	17.1502	16.0863	15.5258	15.601	15.6619	18.408	25.8123	20.2304	20.2669	22.0682	20.0413	17.8967	30.4667	26.8011	30.9635	33.0996	32.3511
3045.1	19.6326	17.7927	17.1731	16.0784	15.5405	15.6124	15.6857	18.4143	25.8066	20.1974	20.2644	22.0614	19.9835	17.8833	30.4273	26.7853	30.9242	33.0667	32.3115
3046.92	19.6307	17.8405	17.1847	16.0888	15.5553	15.6269	15.6983	18.4227	25.8163	20.2065	20.2605	22.0445	19.974	17.8523	30.3956	26.7722	30.888	33.0489	32.2876
3048.74	19.6638	17.8897	17.1993	16.1251	15.5662	15.6613	15.712	18.433	25.8334	20.2282	20.2521	22.0351	19.9867	17.8357	30.3616	26.7553	30.8677	33.0733	32.2532
3050.55	19.7013	17.8928	17.2165	16.1607	15.5829	15.6912	15.7225	18.4587	25.8531	20.2489	20.2477	22.043	20.0031	17.8356	30.2715	26.7025	30.8285	33.1267	32.2421
3052.37	19.7075	17.8654	17.2351	16.1745	15.5981	15.6933	15.7252	18.4841	25.8598	20.2458	20.2518	22.0559	20.02	17.8219	30.2156	26.6665	30.8063	33.169	32.2619
3054.19	19.6875	17.8417	17.2578	16.1817	15.598	15.6816	15.725	18.4797	25.8388	20.2062	20.2569	22.0633	20.0507	17.8288	30.2553	26.6685	30.8206	33.1712	32.2761
3056	19.6694	17.8491	17.2776	16.1865	15.5804	15.6741	15.7286	18.4365	25.8204	20.177	20.2628	22.0512	20.0767	17.8857	30.3308	26.6694	30.8396	33.1501	32.2899
3057.81	19.6756	17.8775	17.2726	16.1819	15.5721	15.6678	15.7331	18.4079	25.8038	20.1757	20.2617	22.0259	20.0818	17.9679	30.3795	26.6733	30.8439	33.1294	32.2665
3059.63	19.693	17.9046	17.2287	16.1612	15.5913	15.6395	15.7297	18.4208	25.7638	20.1704	20.2472	22.018	20.0719	18.0157	30.3518	26.6745	30.8166	33.094	32.1975
3061.44	19.7025	17.9091	17.1925	16.1516	15.6214	15.624	15.7281	18.4392	25.7396	20.1686	20.2354	22.0438	20.0606	18.0028	30.2788	26.6685	30.7734	33.0332	32.1578
3063.25	19.672	17.8914	17.1821	16.1669	15.6426	15.6436	15.7281	18.449	25.724	20.1668	20.2359	22.0798	20.0495	17.9694	30.2231	26.6687	30.7477	32.9962	32.1554
3065.07	19.5928	17.8702	17.1669	16.186	15.634	15.6756	15.7246	18.4398	25.6898	20.1598	20.24	22.0923	20.0356	17.9495	30.1801	26.6604	30.7576	32.9476	32.1539
3066.88	19.5331	17.8449	17.1531	16.1977	15.6051	15.6983	15.7252	18.4202	25.6681	20.1581	20.2379	22.0398	20.0309	17.9258	30.1283	26.6398	30.7787	32.8728	32.1507
3068.69	19.5277	17.8053	17.1396	16.1862	15.5864	15.6945	15.7188	18.4053	25.6387	20.1388	20.2147	21.9618	20.028	17.8921	30.0917	26.6291	30.7771	32.8351	32.0896
3070.5	19.5357	17.7821	17.1213	16.1584	15.5683	15.6761	15.7038	18.4042	25.5938	20.1004	20.1793	21.9263	20.0187	17.8745	30.0186	26.5834	30.6697	32.7817	31.9955
3072.31	19.5463	17.778	17.1027	16.1424	15.5406	15.6666	15.697	18.4053	25.5719	20.0779	20.1531	21.9099	20.0088	17.8313	29.9299	26.5147	30.5186	32.7058	31.9434
3074.12	19.5352	17.7721	17.0453	16.1314	15.5247	15.6572	15.6674	18.391	25.5371	20.055	20.1063	21.8909	19.9476	17.7751	29.9057	26.4841	30.4539	32.6687	31.9207
3075.93	19.5005	17.7719	16.9612	16.1149	15.509	15.6394	15.6218	18.3061	25.4842	20.0259	20.0497	21.8829	19.8624	17.7541	29.9534	26.4879	30.4649	32.6604	31.9042
3077.73	19.476	17.7779	16.921	16.1076	15.4907	15.6305	15.601	18.1961	25.4515	20.0119	20.0314	21.8765	19.8326	17.756	30.0065	26.4939	30.4841	32.649	31.8948
3079.54	19.4441	17.7848	16.9243	16.0599	15.4841	15.592	15.5955	18.1544	25.4156	20.0065	20.052	21.867	19.8626	17.7591	29.9997	26.4812	30.474	32.6178	31.887
3081.35	19.396	17.789	16.9371	15.9903	15.4785	15.5366	15.5874	18.1583	25.3773	20.0006	20.0779	21.8446	19.8993	17.7586	29.892	26.4296	30.4315	32.5502	31.8768
3083.16	19.3704	17.7437	16.949	15.9693	15.4675	15.5188	15.5713	18.1648	25.3603	19.9909	20.0861	21.7747	19.8976	17.7606	29.7754	26.3715	30.3905	32.4832	31.8553
3084.96	19.3479	17.6731	16.9632	15.9901	15.4531	15.5193	15.5374	18.163	25.3547	19.9579	20.0944	21.7093	19.8393	17.7615	29.7557	26.3451	30.3843	32.4599	31.8028
3086.77	19.3211	17.6451	16.9756	16.0128	15.4319	15.5174	15.5052	18.1613	25.3491	19.9224	20.0998	21.7079	19.7743	17.7573	29.8372	26.3509	30.4175	32.4809	31.754
3088.57	19.3158	17.6557	16.976	16.0104	15.4111	15.5121	15.5033	18.162	25.3344	19.9174	20.086	21.7663	19.7524	17.7537	29.9179	26.3587	30.4468	32.5041	31.7385
3090.38	19.3489	17.6707	16.954	15.9605	15.4038	15.4844	15.5504	18.1718	25.2982	19.9607	20.0429	21.8152	19.7567	17.7456	29.9036	26.3424	30.4143	32.4882	31.7286
3092.18	19.3866	17.67	16.9296	15.9042	15.4278	15.4531	15.5972	18.2311	25.2638	20.0027	19.9977	21.8013	19.7629	17.725	29.8095	26.3086	30.2863	32.4332	31.7215
3093.98	19.3854	17.6447	16.9319	15.8886	15.4551	15.4476	15.6025	18.2881	25.256	19.99	19.9745	21.7464	19.7562	17.692	29.7222	26.2793	30.1748	32.3859	31.7129
3095.79	19.3347	17.6165	16.9821	15.9039	15.4603	15.4768	15.602	18.2863	25.2694	19.9244	19.9604	21.704	19.7433	17.6672	29.7049	26.2833	30.1818	32.3938	31.6891
3097.59	19.279	17.611	17.0317	15.9255	15.4647	15.5074	15.5988	18.2505	25.2854	19.867	19.9524	21.7108	19.7317	17.6777	29.7186	26.3282	30.2716	32.4511	31.6608
3099.39	19.2694	17.6334	17.0383	15.942	15.4715	15.5156	15.5946	18.2228	25.2948	19.8692	19.9511	21.7448	19.7378	17.7273	29.7254	26.3568	30.3459	32.4909	31.6263
3101.19	19.333	17.6571	17.0391	15.9749	15.4878	15.5342	15.5989	18.2334	25.3081	19.9093	19.9561	21.7648	19.7783	17.7647	29.716	26.3531	30.3495	32.4558	31.5792
3102.99	19.4046	17.6592	17.0377	16.0085	15.5232	15.549	15.6014	18.2656	25.3133	19.939	19.9642	21.7599	19.814	17.7767	29.7203	26.3654	30.3309	32.3722	31.5509
3104.79	19.4234	17.6581	17.0385	16.037	15.5471	15.5531	15.6057	18.2939	25.3109	19.9427	19.9878	21.7568	19.8401	17.7943	29.7191	26.3639	30.3003	32.3147	31.6006
3106.59	19.4286	17.6619	17.0556	16.0835	15.5474	15.5733	15.6293	18.3029	25.3171	19.9576	20.0369	21.7513	19.8924	17.8028	29.7246	26.3609	30.2632	32.3551	31.7107
3108.39	19.4333	17.6836	17.0689	16.1178	15.5516	15.5913	15.6513	18.3057	25.3155	19.9627	20.0668	21.7702	19.9213	17.8086	29.7536	26.3825	30.225	32.4517	31.7588
3110.19	19.4534	17.7361	17.0792	16.1273	15.5542	15.5969	15.6816	18.3099	25.3274	19.967	20.0742	21.8126	19.9098	17.8212	29.7734	26.3913	30.209	32.491	31.7118
3111.99	19.5094	17.7812	17.1141	16.14	15.5668	15.6054	15.7332	18.3266	25.3693	19.9909	20.0918	21.8277	19.8937	17.831	29.8102	26.4087	30.2689	32.4564	31.6501
3113.79	19.553	17.8009	17.1434	16.147	15.5965	15.6142	15.7644	18.3539	25.3846	20.0078	20.1026	21.852	19.8872	17.8542	29.8717	26.4501	30.38	32.4228	31.6234
3115.58	19.5503	17.8242	17.1645	16.1505	15.6153	15.6394	15.7788	18.3776	25.3798	20.0426	20.1442	21.9047	19.9313	17.8916	29.8964	26.4665	30.4441	32.4092	31.6753
3117.38	19.5315	17.8369	17.1993	16.1602	15.6339	15.6887	15.8007	18.4165	25.3884	20.1058	20.2196	21.9295	20.0091	17.9206	29.8918	26.4514	30.4427	32.424	31.7556
3119.17	19.5134	17.8512	17.2319	16.1685	15.6693	15.7273	15.8189	18.4734	25.3915	20.1463	20.2559	21.9404	20.047	17.9568	29.8878	26.4352	30.4253	32.4499	31.7904
3120.97	19.5251	17.8871	17.2923	16.2043	15.7015	15.7595	15.8526	18.5056	25.4119	20.1739	20.2361	21.956	20.0466	17.9964	29.8886	26.4391	30.4207	32.4701	31.7723
3122.76	19.5672	17.912	17.3787	16.2697	15.7485	15.8015	15.8987	18.5092	25.4478	20.2011	20.2045	21.9696	20.0447	18.0196	29.9231	26.471	30.4418	32.4877	31.7438
3124.56	19.5934	17.9382	17.4194	16.3116	15.8046	15.8317	15.93	18.5093	25.4683	20.209	20.1969	21.9896	20.0464	18.0424	29.9676	26.507	30.4709	32.5057	31.742
3126.35	19.605	17.9835	17.3943	16.3386	15.8372	15.8602	15.9458	18.5208	25.4816	20.2047	20.2311	22.0087	20.0422	18.0628	29.9918	26.5226	30.494	32.5293	31.7945
3128.14	19.6276	18.0157	17.3543	16.3705	15.8661	15.8925	15.9563	18.5624	25.4941	20.2006	20.2737	22.0215	20.0355	18.0744	30.032	26.5164	30.5241	32.5909	31.8466
3129.94	19.6419	18.0559	17.3467	16.3972	15.8947	15.9164	15.9704	18.6146	25.5064	20.2045	20.2946	22.0426	20.0403	18.0937	30.065	26.5076	30.5459	32.6464	31.8523
3131.73	19.6522	18.1075	17.4025	16.4389	15.9126	15.9645	16.0062	18.6515	25.5449	20.2285	20.3278	22.0609	20.0713	18.1083	30.0622	26.5181	30.5381	32.6422	31.8514
3133.52	19.668	18.1344	17.4768	16.4823	15.9511	16.0204	16.0388	18.6859	25.5818	20.2539	20.3621	22.0699	20.1076	18.1159	30.0598	26.563	30.5082	32.5876	31.854
3135.31	19.686	18.1413	17.5159	16.499	15.9909	16.0477	16.0427	18.7137	25.5831	20.2672	20.378	22.0869	20.138	18.1448	30.0564	26.6014	30.4868	32.534	31.8625
3137.1	19.7258	18.1469	17.5356	16.5042	16.0081	16.0815	16.0389	18.7248	25.5647	20.2978	20.4039	22.1003	20.2073	18.1719	30.0551	26.6017	30.5082	32.5195	31.8801
3138.89	19.7758	18.1621	17.5496	16.5073	16.0333	16.1163	16.0407	18.7309	25.5523	20.3303	20.4262	22.1162	20.2751	18.1813	30.081	26.5865	30.5789	32.5292	31.8943
3140.68	19.8099	18.2035	17.5614	16.5141	16.0563	16.1321	16.0717	18.7388	25.5728	20.3507	20.432	22.1595	20.3047	18.1885	30.1014	26.5775	30.6353	32.5409	31.8964
3142.47	19.843	18.2444	17.5878	16.5498	16.0689	16.151	16.1619	18.7604	25.637	20.3755	20.4406	22.1918	20.3254	18.2059	30.0782	26.5918	30.629	32.5563	31.8931
3144.26	19.8725	18.256	17.6186	16.5873	16.0946	16.1687	16.2388	18.8121	25.6902	20.3964	20.4532	22.2106	20.3386	18.2584	30.0173	26.6246	30.5877	32.6008	31.8924
3146.05	19.8892	18.267	17.6541	16.6115	16.1187	16.184	16.2536	18.8569	25.6878	20.4115	20.4737	22.2482	20.3437	18.3465	29.9857	26.6529	30.5636	32.6321	31.8871
3147.83	19.918	18.2817	17.7268	16.6672	16.1359	16.2223	16.249	18.8742	25.6526	20.4338	20.5052	22.2725	20.346	18.4026	30.0187	26.6667	30.5752	32.6058	31.8713
3149.62	19.9447	18.3052	17.7864	16.7169	16.1639	16.2599	16.2506	18.8929	25.6339	20.454	20.5282	22.2654	20.3489	18.4071	30.0764	26.6806	30.5891	32.5379	31.8742
3151.41	19.9514	18.3652	17.7974	16.7376	16.1879	16.2852	16.2707	18.9099	25.6723	20.4819	20.5248	22.2458	20.3535	18.403	30.1272	26.7043	30.6023	32.5103	31.901
3153.19	19.9564	18.4188	17.7982	16.7661	16.2155	16.3221	16.2957	18.9236	25.7459	20.5324	20.5064	22.2473	20.361	18.4103	30.1655	26.7494	30.5954	32.5745	31.9358
3154.98	19.9638	18.4313	17.8016	16.7924	16.2665	16.3486	16.323	18.9387	25.7993	20.577	20.508	22.2806	20.3796	18.4419	30.2071	26.8037	30.5737	32.6746	31.9733
3156.76	19.9782	18.4313	17.8223	16.8171	16.3155	16.3571	16.3703	18.9602	25.8025	20.6103	20.5592	22.3252	20.4163	18.4834	30.2392	26.8406	30.569	32.731	31.9941
3158.55	20.0067	18.4344	17.8598	16.8522	16.3708	16.3686	16.4377	18.9978	25.7903	20.6444	20.6352	22.3661	20.4625	18.5186	30.2271	26.8631	30.5609	32.748	32.0068
3160.33	20.0371	18.4659	17.8894	16.8855	16.4404	16.3855	16.4865	19.0459	25.7976	20.6718	20.6831	22.3997	20.5047	18.5511	30.1898	26.8818	30.5499	32.7635	32.0241
3162.11	20.079	18.5335	17.9172	16.9161	16.4868	16.412	16.518	19.0841	25.806	20.6874	20.6807	22.4299	20.5555	18.5814	30.171	26.8834	30.5738	32.7635	31.9992
3163.89	20.151	18.5927	17.96	16.9512	16.5029	16.4466	16.5469	19.1174	25.8051	20.6996	20.6638	22.4535	20.6101	18.5973	30.1374	26.8345	30.6252	32.7154	31.9683
3165.68	20.207	18.6117	17.9974	16.9872	16.5099	16.4833	16.5689	19.1515	25.8185	20.7195	20.6685	22.4665	20.6387	18.5993	30.1054	26.783	30.6816	32.6666	31.9908
3167.46	20.222	18.6116	18.0364	17.0404	16.5198	16.5476	16.596	19.1754	25.8106	20.7422	20.6998	22.4802	20.6339	18.604	30.1174	26.7945	30.7201	32.6672	32.0372
3169.24	20.2235	18.6249	18.0803	17.1025	16.5374	16.6285	16.6251	19.1868	25.7965	20.7657	20.7402	22.5061	20.6265	18.6321	30.1483	26.8572	30.702	32.6557	32.0843
3171.02	20.2334	18.6701	18.1119	17.1426	16.5589	16.6769	16.6402	19.1948	25.8149	20.7918	20.7803	22.5407	20.6447	18.6917	30.1784	26.9241	30.6749	32.6488	32.1017
3172.8	20.2599	18.7238	18.1377	17.1679	16.5841	16.687	16.622	19.2049	25.8402	20.8092	20.8224	22.577	20.6778	18.749	30.187	26.9629	30.6848	32.6662	32.0428
3174.58	20.291	18.7555	18.164	17.1925	16.6239	16.6875	16.6067	19.2047	25.8632	20.8244	20.8613	22.6033	20.7138	18.767	30.147	26.9796	30.7084	32.6556	31.9995
3176.36	20.3161	18.7531	18.1867	17.2131	16.6655	16.6976	16.632	19.2083	25.8794	20.8413	20.8794	22.6095	20.7465	18.7426	30.1246	26.9947	30.7311	32.656	32.0181
3178.13	20.3399	18.7472	18.1926	17.2011	16.6878	16.7071	16.6858	19.2339	25.8674	20.8428	20.8538	22.6197	20.7718	18.7328	30.1688	27.013	30.736	32.6914	32.0276
3179.91	20.3658	18.773	18.197	17.1828	16.6825	16.7168	16.7377	19.2747	25.8623	20.8453	20.8342	22.6356	20.7965	18.7699	30.2437	27.0173	30.7117	32.719	32.0445
3181.69	20.3903	18.8316	18.217	17.1969	16.6818	16.7346	16.7741	19.316	25.8894	20.8649	20.8558	22.6358	20.8233	18.8266	30.3081	27.0266	30.7018	32.7374	32.0675
3183.47	20.4095	18.8916	18.2402	17.2436	16.7142	16.7587	16.8148	19.3552	25.9243	20.8945	20.8847	22.6467	20.8427	18.8726	30.3376	27.0398	30.7221	32.733	32.0767
3185.24	20.4257	18.919	18.2647	17.293	16.7689	16.7839	16.8494	19.4098	25.9584	20.9231	20.9129	22.678	20.8594	18.885	30.3483	27.0385	30.7437	32.7005	32.0837
3187.02	20.4406	18.8921	18.2896	17.328	16.8152	16.8133	16.8728	19.4567	25.9609	20.9333	20.9308	22.712	20.8736	18.8737	30.3526	27.0482	30.7688	32.6883	32.0488
3188.79	20.446	18.8666	18.3081	17.3714	16.8244	16.8622	16.8952	19.4783	25.913	20.9223	20.9362	22.7365	20.8814	18.8691	30.3277	27.0698	30.7777	32.7195	31.9672
3190.57	20.4499	18.8967	18.3305	17.4095	16.8032	16.9061	16.9167	19.4865	25.8973	20.9283	20.9507	22.7457	20.89	18.8718	30.2731	27.0877	30.7666	32.7666	31.9367
3192.34	20.4599	18.9583	18.3673	17.4175	16.7944	16.9235	16.9324	19.4984	25.9414	20.9695	20.9708	22.749	20.8991	18.872	30.2638	27.1098	30.7735	32.805	31.9558
3194.11	20.467	19.0147	18.4132	17.3923	16.8144	16.925	16.9406	19.5196	25.9909	21.0199	20.9808	22.7607	20.9059	18.8928	30.3012	27.1235	30.7806	32.8325	31.9751
3195.89	20.4839	19.0431	18.4487	17.3844	16.8403	16.9338	16.9538	19.5399	26.0282	21.0552	21.0017	22.7907	20.9238	18.9424	30.34	27.1303	30.771	32.861	31.9976
3197.66	20.5206	19.0607	18.4497	17.4261	16.8715	16.9647	16.9842	19.5626	26.0401	21.0612	21.0301	22.8272	20.9723	18.9989	30.3689	27.1483	30.7734	32.8761	32.0091
3199.43	20.5623	19.0753	18.4254	17.4854	16.9147	17.0042	17.0213	19.6016	26.0438	21.0573	21.055	22.8456	21.0358	19.03	30.3661	27.1564	30.7814	32.8421	32.0182
3201.2	20.6008	19.0852	18.4213	17.5232	16.9635	17.0355	17.0403	19.6507	26.059	21.0665	21.0801	22.8316	21.0707	19.0226	30.3531	27.1555	30.7907	32.7926	32.0406
3202.97	20.6188	19.0868	18.4533	17.5257	16.9997	17.0528	17.0273	19.6797	26.0741	21.0854	21.0889	22.8146	21.0528	19.0087	30.3485	27.1697	30.8112	32.7803	32.0723
3204.74	20.6119	19.0966	18.4936	17.5214	17.0376	17.0652	17.0055	19.6776	26.0828	21.1028	21.0892	22.8256	21.0236	19.0256	30.3168	27.2025	30.8452	32.7881	32.097
3206.51	20.6135	19.1205	18.5255	17.5299	17.0784	17.0788	17.0056	19.6664	26.0922	21.1182	21.1057	22.86	21.0253	19.0794	30.2816	27.2315	30.8731	32.7948	32.1063
3208.28	20.6416	19.1492	18.5528	17.5449	17.1077	17.107	17.0386	19.6661	26.0932	21.133	21.1469	22.8913	21.0353	19.1248	30.2887	27.2342	30.8819	32.7944	32.107
3210.05	20.6769	19.1774	18.5786	17.5573	17.1389	17.142	17.076	19.6708	26.0897	21.1438	21.1864	22.9094	21.0446	19.1425	30.3457	27.2069	30.8846	32.7852	32.1015
3211.82	20.6998	19.1865	18.5965	17.575	17.166	17.1646	17.0972	19.6785	26.0906	21.1494	21.2052	22.9258	21.0657	19.1611	30.3914	27.1761	30.8815	32.7741	32.1034
3213.59	20.7027	19.1845	18.619	17.6209	17.1745	17.1696	17.1186	19.698	26.0954	21.1599	21.2206	22.9381	21.1065	19.1726	30.3936	27.1541	30.8763	32.7731	32.1272
3215.35	20.6992	19.1957	18.6443	17.6691	17.1668	17.1697	17.1348	19.7375	26.0991	21.1697	21.2325	22.9468	21.1414	19.1925	30.3894	27.1273	30.8816	32.7891	32.1363
3217.12	20.7036	19.2134	18.67	17.6861	17.1564	17.1803	17.1572	19.7708	26.1003	21.1808	21.2415	22.9578	21.1545	19.2461	30.3886	27.1087	30.8927	32.7974	32.1245
3218.89	20.7258	19.2271	18.7203	17.6919	17.1573	17.2157	17.2228	19.7863	26.1033	21.2073	21.2578	22.9668	21.1626	19.2819	30.4229	27.1205	30.9194	32.8031	32.1204
3220.65	20.7521	19.237	18.7642	17.6978	17.1742	17.2493	17.2715	19.8153	26.1052	21.2263	21.268	22.9745	21.1635	19.29	30.5024	27.1609	30.9682	32.8316	32.119
3222.42	20.7639	19.256	18.7738	17.7168	17.1924	17.2611	17.2739	19.84	26.1079	21.2377	21.2737	22.9841	21.1535	19.2985	30.5345	27.179	30.9888	32.8437	32.1375
3224.18	20.7562	19.2747	18.7752	17.7704	17.2199	17.274	17.2679	19.8582	26.1146	21.2647	21.2906	22.9962	21.1361	19.2992	30.4726	27.1669	30.9347	32.8188	32.1702
3225.94	20.7457	19.28	18.7705	17.8156	17.2775	17.2809	17.2548	19.8895	26.1084	21.2753	21.2948	23.025	21.1242	19.3016	30.3758	27.1553	30.8346	32.7787	32.1776
3227.71	20.752	19.2747	18.7599	17.824	17.3145	17.2813	17.2342	19.9057	26.0723	21.2535	21.2754	23.063	21.1389	19.3099	30.3241	27.1621	30.7942	32.7595	32.1852
3229.47	20.7802	19.2659	18.7499	17.8223	17.3101	17.2924	17.2086	19.8903	26.0184	21.2186	21.2477	23.0855	21.1768	19.3075	30.3446	27.2483	30.8825	32.7815	32.2041
3231.23	20.8051	19.2538	18.7432	17.8163	17.2932	17.3035	17.1942	19.8598	25.9923	21.2005	21.233	23.1172	21.2056	19.2931	30.3823	27.3664	31.0065	32.8126	32.1894
3233	20.8082	19.2327	18.7376	17.8062	17.2797	17.32	17.2181	19.8382	26.0364	21.2332	21.2622	23.1536	21.2454	19.2774	30.3869	27.3825	31.0228	32.8075	32.1362
3234.76	20.8052	19.2237	18.7281	17.7912	17.2914	17.3507	17.262	19.8416	26.1095	21.2873	21.312	23.1401	21.2961	19.2732	30.3422	27.2788	30.9144	32.7555	32.0812
3236.52	20.7969	19.2597	18.7208	17.7851	17.3147	17.3678	17.2779	19.8543	26.1291	21.2964	21.3274	23.0692	21.3009	19.2885	30.2915	27.168	30.7998	32.7014	32.0455
3238.28	20.7929	19.3353	18.744	17.8255	17.3158	17.3648	17.2709	19.8544	26.0782	21.2423	21.3117	23.0032	21.256	19.3015	30.2744	27.1302	30.762	32.674	32.0128
3240.04	20.8055	19.384	18.7897	17.8943	17.2969	17.3566	17.2617	19.8451	26.0184	21.1802	21.294	22.9888	21.2063	19.2913	30.2932	27.1405	30.7815	32.6495	31.9848
3241.8	20.8187	19.3933	18.808	17.9177	17.2804	17.3493	17.2646	19.8385	26	21.1543	21.2795	23.0071	21.1863	19.2665	30.3095	27.1468	30.7956	32.625	31.971
3243.56	20.8404	19.3975	18.8069	17.8962	17.2821	17.3598	17.3097	19.8431	26.0199	21.1472	21.2564	23.0225	21.1968	19.2455	30.2991	27.1272	30.7839	32.6008	31.9675
3245.31	20.8728	19.3877	18.8082	17.8708	17.3151	17.3793	17.3515	19.8797	26.0358	21.1392	21.2328	23.0221	21.2063	19.2534	30.2755	27.0951	30.7772	32.5634	31.9641
3247.07	20.8807	19.361	18.8115	17.8561	17.3487	17.3899	17.3415	19.9159	26.0138	21.1263	21.2125	23.0159	21.1897	19.2981	30.2605	27.0738	30.7744	32.5349	31.9556
3248.83	20.8453	19.3313	18.8267	17.8453	17.3539	17.405	17.2952	19.9177	25.9551	21.1121	21.1776	23.013	21.1504	19.3315	30.2691	27.0778	30.7563	32.5485	31.9467
3250.58	20.7961	19.3171	18.8399	17.8334	17.3412	17.4165	17.2603	19.8983	25.9112	21.1047	21.1548	23.0134	21.1227	19.3261	30.2935	27.0988	30.7172	32.6073	31.9439
3252.34	20.7696	19.3419	18.8352	17.8191	17.3294	17.4099	17.2742	19.8812	25.9222	21.124	21.1711	23.0124	21.1333	19.3007	30.3024	27.1174	30.7046	32.64	31.946
3254.1	20.7678	19.3742	18.8233	17.7964	17.3312	17.3966	17.3271	19.8856	25.9718	21.1816	21.2175	23.0124	21.1724	19.281	30.2669	27.1428	30.7322	32.6005	31.9482
3255.85	20.7705	19.3748	18.8153	17.7822	17.3443	17.3858	17.364	19.9115	26.0052	21.2202	21.2498	23.0034	21.2007	19.2673	30.205	27.189	30.7648	32.5266	31.9458
3257.61	20.7628	19.3599	18.8266	17.7986	17.3592	17.3904	17.3573	19.9314	25.9912	21.2005	21.2416	22.9833	21.1871	19.2509	30.1747	27.2152	30.7616	32.4931	31.9167
3259.36	20.7495	19.3455	18.8708	17.8479	17.3757	17.4222	17.3352	19.9285	25.9582	21.1489	21.2162	22.969	21.1474	19.2496	30.1766	27.1959	30.6648	32.5084	31.8701
3261.11	20.7399	19.3465	18.9101	17.8871	17.3993	17.4453	17.3222	19.9157	25.9393	21.1173	21.2072	22.9549	21.1322	19.2645	30.1816	27.1581	30.529	32.5248	31.8433
3262.87	20.742	19.3803	18.915	17.8911	17.413	17.4359	17.3313	19.9088	25.9291	21.1211	21.223	22.9379	21.1664	19.2829	30.1807	27.1337	30.505	32.5261	31.8272
3264.62	20.759	19.4129	18.9	17.885	17.3957	17.4153	17.3477	19.9071	25.9103	21.1339	21.2422	22.9377	21.216	19.2815	30.131	27.0991	30.6249	32.4994	31.8071
3266.37	20.7757	19.4074	18.8898	17.883	17.3588	17.404	17.3589	19.9026	25.8998	21.1474	21.2505	22.9612	21.2378	19.2394	30.0651	27.0593	30.7589	32.4625	31.7959
3268.12	20.7853	19.3722	18.8888	17.8965	17.3466	17.3976	17.3721	19.9008	25.8754	21.1525	21.2289	22.9857	21.2206	19.1941	30.0507	27.0585	30.7886	32.4331	31.8013
3269.87	20.8026	19.3559	18.8838	17.9186	17.3817	17.383	17.385	19.8862	25.8415	21.1512	21.1987	22.9899	21.1954	19.1933	30.0825	27.0961	30.707	32.4069	31.8044
3271.62	20.8173	19.3873	18.8819	17.9336	17.4274	17.3843	17.3811	19.8636	25.8403	21.1496	21.1906	22.978	21.1827	19.23	30.1079	27.1271	30.6267	32.3818	31.7567
3273.37	20.818	19.4337	18.8794	17.9323	17.4481	17.4193	17.3619	19.8597	25.8894	21.151	21.1925	22.9634	21.1724	19.2586	30.091	27.1088	30.5785	32.3535	31.6381
3275.12	20.8086	19.4575	18.8742	17.9256	17.465	17.4628	17.3394	19.8792	25.9358	21.1512	21.1899	22.9361	21.1623	19.2563	30.0378	27.0398	30.4887	32.3116	31.5552
3276.87	20.8033	19.4195	18.8723	17.9295	17.4775	17.4756	17.3163	19.8984	25.9145	21.1395	21.1767	22.8845	21.1516	19.2372	29.9947	26.9825	30.4225	32.2758	31.5645
3278.62	20.7909	19.3531	18.8734	17.9524	17.4606	17.4497	17.2847	19.8901	25.8119	21.1052	21.1479	22.846	21.1258	19.222	29.9598	26.9568	30.4304	32.2612	31.6106
3280.37	20.7673	19.3247	18.8722	17.9743	17.4083	17.4167	17.2635	19.8434	25.7255	21.0742	21.1218	22.833	21.1073	19.225	29.8961	26.9276	30.4709	32.2585	31.6295
3282.12	20.7549	19.3427	18.858	17.9638	17.3619	17.4048	17.2722	19.8029	25.7023	21.0448	21.1108	22.8259	21.1097	19.2418	29.8526	26.9048	30.4895	32.2455	31.6011
3283.86	20.7592	19.3666	18.8104	17.8898	17.3455	17.4109	17.3046	19.7937	25.6814	20.9845	21.1066	22.8249	21.1147	19.246	29.8449	26.8766	30.4687	32.2279	31.5589
3285.61	20.7655	19.3668	18.764	17.8184	17.3339	17.4151	17.3292	19.7865	25.6628	20.9445	21.0993	22.827	21.1125	19.219	29.8419	26.8302	30.4368	32.2224	31.5251
3287.35	20.7594	19.3498	18.7514	17.8056	17.327	17.4043	17.3352	19.783	25.655	20.9616	21.0849	22.8259	21.0977	19.177	29.8255	26.7999	30.4072	32.2065	31.5056
3289.1	20.7341	19.3277	18.7567	17.8149	17.3315	17.3867	17.3377	19.8024	25.6567	21.0093	21.0691	22.8247	21.0767	19.1595	29.7943	26.8059	30.3832	32.1739	31.4837
3290.84	20.7064	19.3019	18.7607	17.8254	17.3462	17.3738	17.3335	19.8496	25.6526	21.0327	21.0532	22.8383	21.0588	19.1725	29.7582	26.8225	30.3545	32.134	31.4645
3292.59	20.6861	19.261	18.7482	17.8396	17.351	17.3849	17.3328	19.8715	25.6614	21.0214	21.0346	22.8552	21.0357	19.1889	29.7488	26.8183	30.3171	32.1041	31.4739
3294.33	20.6397	19.2276	18.7234	17.8735	17.3479	17.4249	17.336	19.8498	25.6864	21.005	21.0119	22.8412	21.0019	19.1945	29.82	26.8132	30.277	32.1034	31.4833
3296.07	20.597	19.2263	18.7097	17.8888	17.3485	17.4422	17.3203	19.816	25.6824	20.9789	21.0004	22.7986	20.9787	19.195	29.8983	26.8066	30.2427	32.0975	31.4421
3297.82	20.5917	19.2506	18.7244	17.8658	17.3435	17.4068	17.286	19.788	25.6615	20.9392	21.024	22.7491	20.9759	19.1916	29.8562	26.7848	30.2139	32.0524	31.3617
3299.56	20.61	19.2659	18.7503	17.8278	17.3458	17.3495	17.2494	19.7684	25.6387	20.8939	21.0521	22.6987	20.9758	19.1745	29.6995	26.7759	30.1859	31.994	31.2834
3301.3	20.6234	19.2609	18.7528	17.7974	17.3481	17.3077	17.2201	19.7482	25.6	20.8734	21.0312	22.6468	20.9731	19.1463	29.5567	26.76	30.1549	31.9407	31.2522
3303.04	20.6192	19.2578	18.7146	17.789	17.3248	17.2923	17.2015	19.7351	25.5501	20.9083	20.9665	22.5994	20.9973	19.12	29.5418	26.717	30.1268	31.8847	31.2754
3304.78	20.6131	19.25	18.6618	17.7886	17.2814	17.2854	17.1848	19.7483	25.4994	20.9421	20.9038	22.5926	21.0127	19.1008	29.6463	26.6656	30.1093	31.8202	31.2773
3306.52	20.6055	19.2506	18.6343	17.7836	17.2399	17.2831	17.1688	19.7617	25.4498	20.9294	20.8852	22.6409	20.989	19.0837	29.7022	26.6168	30.0895	31.77	31.2279
3308.26	20.609	19.2574	18.6766	17.796	17.2119	17.3002	17.1645	19.7519	25.3969	20.9048	20.9209	22.6727	20.9665	19.067	29.6157	26.5839	30.0611	31.7706	31.1638
3310	20.6177	19.2444	18.7273	17.8106	17.1908	17.3177	17.1602	19.7446	25.3523	20.8771	20.9463	22.6559	20.9469	19.0586	29.4595	26.5712	30.0271	31.817	31.1176
3311.74	20.6028	19.2116	18.7158	17.7964	17.1718	17.3059	17.1651	19.7324	25.3451	20.8588	20.9215	22.6193	20.927	19.0576	29.3563	26.5557	29.9833	31.8277	31.1145
3313.48	20.5539	19.1742	18.6771	17.762	17.1568	17.2713	17.199	19.7034	25.3856	20.8647	20.8737	22.5831	20.9128	19.0407	29.3532	26.5326	29.9343	31.7768	31.132
3315.22	20.4961	19.1432	18.6374	17.7266	17.1505	17.2336	17.2117	19.6644	25.403	20.8572	20.8357	22.5401	20.8994	18.9998	29.382	26.5105	29.8901	31.7091	31.1068
3316.95	20.4557	19.1337	18.6093	17.7052	17.1479	17.2125	17.1873	19.6304	25.3749	20.816	20.8239	22.4864	20.8833	18.9529	29.3842	26.4955	29.8403	31.6569	31.0204
3318.69	20.4197	19.1279	18.6003	17.7004	17.1627	17.2169	17.1573	19.6182	25.3397	20.7605	20.8212	22.4602	20.8637	18.9269	29.3778	26.5088	29.7617	31.6284	30.9228
3320.42	20.3872	19.1063	18.5906	17.698	17.1995	17.2169	17.127	19.6239	25.3026	20.7195	20.8142	22.4852	20.8368	18.9323	29.3816	26.5285	29.6734	31.6021	30.8731
3322.16	20.3678	19.0782	18.5742	17.6989	17.2018	17.2002	17.0889	19.618	25.2729	20.7075	20.8195	22.5176	20.7954	18.9419	29.3558	26.5122	29.6371	31.5788	30.8779
3323.9	20.366	19.0581	18.5655	17.714	17.151	17.1877	17.0437	19.6063	25.2469	20.7064	20.8378	22.5036	20.7478	18.9329	29.3085	26.4773	29.6638	31.5776	30.8887
3325.63	20.3603	19.0692	18.553	17.7133	17.0885	17.1778	17.0245	19.6044	25.2153	20.6999	20.8203	22.4651	20.7296	18.918	29.2722	26.4466	29.6969	31.5872	30.877
3327.36	20.3451	19.1169	18.535	17.6862	17.0578	17.1926	17.0526	19.5893	25.184	20.6963	20.7512	22.4398	20.7684	18.9075	29.2354	26.4035	29.7059	31.5537	30.8528
3329.1	20.3502	19.1387	18.518	17.6533	17.0811	17.2295	17.0898	19.5501	25.1614	20.6972	20.6816	22.4388	20.8169	18.8863	29.1645	26.3353	29.7127	31.4552	30.8326
3330.83	20.3494	19.0882	18.501	17.6292	17.1174	17.2321	17.0829	19.5107	25.1448	20.6827	20.6501	22.4545	20.8139	18.8474	29.1128	26.2858	29.7181	31.3812	30.7857
3332.56	20.3339	19.0022	18.4931	17.6193	17.1265	17.1877	17.0282	19.4876	25.1253	20.6426	20.632	22.4632	20.7646	18.8185	29.0924	26.2625	29.6935	31.3692	30.6963
3334.29	20.3224	18.9472	18.4919	17.6145	17.1177	17.14	16.9813	19.4561	25.1083	20.6108	20.622	22.4189	20.7221	18.8049	29.0572	26.2289	29.6335	31.3664	30.6374
3336.03	20.3086	18.9581	18.4847	17.6088	17.1104	17.1232	16.973	19.4281	25.0852	20.5993	20.616	22.3194	20.7015	18.7921	29.0308	26.2014	29.593	31.3546	30.6124
3337.76	20.2928	18.9925	18.4687	17.6088	17.101	17.1325	16.979	19.4195	25.0361	20.577	20.5933	22.2532	20.6725	18.7885	28.9977	26.1787	29.5655	31.2938	30.584
3339.49	20.2782	19.0006	18.452	17.6146	17.0717	17.1456	16.9819	19.4136	24.9929	20.5552	20.5714	22.2257	20.6514	18.7853	28.9386	26.1504	29.5168	31.184	30.5548
3341.22	20.2619	18.9776	18.4322	17.6167	17.0419	17.1484	16.9625	19.4075	24.9656	20.5299	20.5471	22.1966	20.6484	18.7723	28.9023	26.1272	29.4789	31.115	30.4883
3342.95	20.2116	18.9522	18.3891	17.6007	17.0189	17.1378	16.92	19.4081	24.9356	20.4894	20.5053	22.1817	20.6492	18.7627	28.8861	26.0935	29.4426	31.0997	30.4041
3344.67	20.1553	18.9393	18.3534	17.5813	16.9905	17.1229	16.8971	19.4202	24.91	20.4652	20.4796	22.1886	20.6387	18.7579	28.8696	26.0517	29.4024	31.0943	30.3742
3346.4	20.141	18.9084	18.3461	17.5636	16.9693	17.0952	16.9087	19.4235	24.8725	20.4563	20.4837	22.2042	20.5956	18.7546	28.8529	26.0411	29.3775	31.0828	30.3851
3348.13	20.143	18.8777	18.3427	17.5327	16.9598	17.0331	16.9298	19.3947	24.8223	20.4443	20.4983	22.2062	20.5358	18.7417	28.8131	26.059	29.347	31.0587	30.4037
3349.86	20.1418	18.865	18.3337	17.5062	16.9555	16.9861	16.9369	19.3464	24.797	20.436	20.4978	22.1908	20.5054	18.7058	28.7676	26.0824	29.3234	31.0374	30.4138
3351.59	20.1288	18.8432	18.3058	17.4811	16.9555	16.9735	16.9177	19.3199	24.782	20.4188	20.4687	22.1824	20.4895	18.6793	28.7429	26.0681	29.3173	31.0201	30.3978
3353.31	20.1033	18.8211	18.2638	17.4448	16.9605	16.9652	16.8939	19.2973	24.7681	20.4009	20.437	22.1666	20.4752	18.6934	28.7215	25.9847	29.2873	30.9913	30.3822
3355.04	20.081	18.7972	18.2424	17.4308	16.9691	16.9637	16.884	19.2652	24.7676	20.4041	20.434	22.1128	20.4781	18.7253	28.7044	25.915	29.2512	30.9651	30.336
3356.76	20.0743	18.7606	18.2394	17.4463	16.9619	16.9705	16.876	19.2474	24.7565	20.417	20.4561	22.0697	20.4719	18.7515	28.67	25.8893	29.1869	30.9245	30.2342
3358.49	20.0746	18.7405	18.239	17.4686	16.9112	16.983	16.8681	19.2226	24.7424	20.4235	20.4782	22.0563	20.4616	18.7324	28.5956	25.8569	29.062	30.8431	30.1737
3360.21	20.0726	18.7527	18.2495	17.4771	16.8629	16.9895	16.8558	19.1975	24.723	20.4072	20.464	22.0397	20.4403	18.6625	28.544	25.8399	28.9891	30.7796	30.1782
3361.94	20.0558	18.7791	18.252	17.447	16.8527	16.9714	16.8243	19.185	24.6692	20.359	20.3939	22.0209	20.3778	18.6229	28.5261	25.8467	29.0068	30.7673	30.1938
3363.66	20.0309	18.7968	18.2509	17.4088	16.8407	16.9478	16.8054	19.1671	24.6262	20.3175	20.3451	21.9952	20.3314	18.6362	28.5073	25.8554	29.0476	30.7801	30.1909
3365.38	20.02	18.7698	18.2501	17.3904	16.834	16.9427	16.8066	19.1547	24.5898	20.2909	20.3526	21.963	20.3328	18.6623	28.4981	25.8585	29.069	30.7771	30.1466
3367.1	20.0142	18.7226	18.2073	17.3536	16.8501	16.9399	16.8018	19.1593	24.5181	20.2568	20.3713	21.9451	20.3477	18.6713	28.5004	25.8459	29.0609	30.722	30.0863
3368.83	20.0077	18.6993	18.1672	17.3239	16.8815	16.9371	16.8008	19.1734	24.4808	20.2417	20.3798	21.9407	20.3521	18.6468	28.5054	25.8262	29.0457	30.6429	30.0462
3370.55	20.0089	18.6857	18.1713	17.3354	16.9016	16.9323	16.804	19.184	24.4997	20.2475	20.3618	21.9412	20.3299	18.6137	28.5006	25.8171	29.0172	30.608	30.0092
3372.27	19.9846	18.6781	18.1893	17.371	16.8911	16.9141	16.8035	19.1797	24.5313	20.2534	20.3286	21.9429	20.2946	18.6006	28.4763	25.8069	28.9429	30.6125	29.9738
3373.99	19.9463	18.6794	18.2031	17.3948	16.8634	16.9026	16.7971	19.1638	24.5415	20.2525	20.302	21.9351	20.2747	18.5889	28.4497	25.7943	28.8587	30.6236	29.9747
3375.71	19.9126	18.6714	18.1982	17.3823	16.847	16.909	16.7791	19.1527	24.5133	20.2342	20.2634	21.9252	20.2702	18.574	28.4205	25.7725	28.8335	30.6293	30.0112
3377.43	19.853	18.6631	18.1782	17.3491	16.8396	16.9199	16.7582	19.1485	24.4738	20.21	20.2196	21.9244	20.2658	18.5653	28.3681	25.7182	28.8519	30.6158	30.0463
3379.15	19.8029	18.6601	18.165	17.3243	16.8292	16.9198	16.7528	19.1471	24.4488	20.2056	20.2062	21.9245	20.2636	18.5519	28.3315	25.6739	28.8716	30.5987	30.0491
3380.86	19.7975	18.6541	18.1466	17.3098	16.8231	16.8775	16.7632	19.1431	24.4294	20.2222	20.1987	21.9252	20.2674	18.5461	28.3517	25.6741	28.8772	30.5451	30.0243
3382.58	19.8136	18.6521	18.1119	17.2925	16.8139	16.8107	16.7743	19.1172	24.4126	20.2432	20.1887	21.8905	20.2737	18.5491	28.404	25.693	28.8716	30.4327	30.0002
3384.3	19.8266	18.6567	18.094	17.2858	16.8086	16.7901	16.7692	19.093	24.3948	20.2291	20.1766	21.8104	20.2769	18.5483	28.435	25.7003	28.8601	30.3625	29.9458
3386.01	19.8179	18.6629	18.0976	17.2957	16.8174	16.8356	16.7432	19.0994	24.3605	20.1528	20.1482	21.7666	20.2777	18.5505	28.4007	25.6601	28.8293	30.3843	29.8564
3387.73	19.7954	18.667	18.1075	17.3103	16.8321	16.8909	16.7238	19.1199	24.335	20.0963	20.132	21.7862	20.2767	18.5468	28.3203	25.5801	28.7833	30.446	29.7994
3389.45	19.7761	18.6457	18.1173	17.3113	16.8457	16.9035	16.7236	19.1319	24.3301	20.0993	20.1582	21.8259	20.2699	18.5341	28.2666	25.5263	28.7618	30.4721	29.7518
3391.16	19.7434	18.6139	18.1301	17.2881	16.8543	16.8707	16.728	19.1114	24.3295	20.1181	20.2141	21.8435	20.2549	18.5247	28.2347	25.498	28.7561	30.4059	29.6973
3392.88	19.7021	18.6094	18.1394	17.2621	16.8554	16.8369	16.7251	19.0565	24.3288	20.1281	20.2414	21.8295	20.2398	18.4811	28.1981	25.4699	28.7457	30.2975	29.654
3394.59	19.6866	18.6238	18.1339	17.2501	16.8463	16.8259	16.7029	19.0267	24.3144	20.0996	20.2	21.8112	20.2195	18.4166	28.1839	25.4536	28.7254	30.241	29.5827
3396.3	19.6872	18.6364	18.1106	17.2407	16.8055	16.8137	16.6708	19.0494	24.2876	20.0439	20.1255	21.7977	20.1902	18.404	28.1953	25.4457	28.6653	30.2104	29.5075
3398.02	19.6891	18.6302	18.0901	17.2293	16.7385	16.8018	16.657	19.0896	24.2713	20.0119	20.0789	21.7555	20.1602	18.4316	28.2089	25.4415	28.5937	30.1746	29.5072
3399.73	19.6831	18.5914	18.0821	17.2043	16.706	16.782	16.6606	19.0981	24.2518	19.9884	20.0317	21.7013	20.1157	18.4562	28.1849	25.437	28.5561	30.1492	29.5743
3401.44	19.6509	18.5523	18.0739	17.1622	16.7	16.7449	16.6637	19.0369	24.2222	19.9567	19.9698	21.6573	20.0669	18.4419	28.1146	25.4268	28.5386	30.1229	29.6277
3403.15	19.6204	18.5284	18.0542	17.1381	16.6861	16.7218	16.6653	18.952	24.2074	19.9471	19.9572	21.6039	20.044	18.3828	28.0591	25.4133	28.5331	30.1029	29.591
3404.87	19.6162	18.4911	17.9971	17.1472	16.6784	16.7214	16.6665	18.9125	24.2057	19.9541	19.991	21.5654	20.0359	18.3324	28.0358	25.3942	28.54	30.0988	29.4886
3406.58	19.6204	18.4546	17.921	17.1657	16.6762	16.7237	16.6664	18.9036	24.2019	19.9591	20.0228	21.5762	20.0318	18.3134	28.0153	25.3697	28.5488	30.1039	29.434
3408.29	19.6219	18.4105	17.8874	17.1698	16.675	16.7161	16.6497	18.8975	24.1693	19.9517	20.0192	21.6189	20.0427	18.3058	28.0114	25.3579	28.5554	30.1101	29.4323
3410	19.6023	18.351	17.8854	17.1535	16.6663	16.6853	16.6077	18.9034	24.0975	19.9339	19.9861	21.644	20.0725	18.2983	27.9937	25.3444	28.5207	30.0536	29.4333
3411.71	19.562	18.3162	17.8854	17.1359	16.6435	16.6494	16.5736	18.9253	24.0456	19.9171	19.958	21.6165	20.096	18.2954	27.945	25.3184	28.4439	29.9395	29.4194
3413.41	19.5342	18.329	17.8839	17.1259	16.6233	16.6322	16.5447	18.9397	24.0321	19.8821	19.9392	21.5619	20.0677	18.302	27.9128	25.3077	28.3867	29.8857	29.3547
3415.12	19.5222	18.3596	17.8699	17.1072	16.6009	16.6294	16.4996	18.9035	24.0222	19.8191	19.917	21.5361	19.9871	18.3122	27.8648	25.3047	28.3215	29.8584	29.2785
3416.83	19.5133	18.3661	17.8576	17.0907	16.56	16.6291	16.4792	18.8102	24.0108	19.7896	19.9077	21.5194	19.9388	18.3055	27.7998	25.3001	28.2458	29.8209	29.256
3418.54	19.5077	18.3164	17.8532	17.0766	16.5375	16.614	16.4862	18.748	23.9806	19.7973	19.8867	21.4956	19.9264	18.2885	27.7658	25.2905	28.2229	29.8311	29.2512
3420.24	19.4765	18.2623	17.8408	17.0368	16.5411	16.5705	16.4927	18.7413	23.9358	19.8036	19.8429	21.4741	19.9078	18.2751	27.7273	25.2487	28.2322	29.8669	29.2509
3421.95	19.4408	18.2473	17.8273	17.0089	16.5448	16.5414	16.4873	18.7459	23.9066	19.7992	19.8182	21.4348	19.8904	18.246	27.6878	25.205	28.2445	29.9026	29.2373
3423.66	19.4251	18.2193	17.8007	17.0088	16.54	16.5417	16.4531	18.7525	23.8771	19.7656	19.7953	21.4018	19.8527	18.2198	27.6784	25.184	28.235	29.8748	29.178
3425.36	19.3727	18.1962	17.7516	17.0102	16.5191	16.5421	16.4121	18.7456	23.8376	19.7248	19.7666	21.3913	19.8175	18.2058	27.6799	25.1563	28.1855	29.7467	29.1191
3427.07	19.3224	18.195	17.7275	17.0054	16.4978	16.5433	16.391	18.7321	23.7981	19.7015	19.7407	21.3797	19.813	18.181	27.6881	25.1312	28.1448	29.6494	29.0597
3428.77	19.3121	18.1944	17.7177	16.9687	16.4775	16.533	16.3727	18.7108	23.7459	19.6762	19.6913	21.379	19.8038	18.1637	27.6717	25.1019	28.1167	29.6401	28.988
3430.47	19.307	18.195	17.6942	16.9139	16.4278	16.5141	16.3586	18.6515	23.7035	19.656	19.6474	21.3461	19.8057	18.1432	27.6171	25.0516	28.0717	29.6531	28.9519
3432.18	19.3043	18.1918	17.674	16.8859	16.3878	16.501	16.3346	18.5984	23.6778	19.6491	19.6313	21.2635	19.806	18.106	27.5825	25.0064	28.0268	29.6507	28.9503
3433.88	19.2856	18.177	17.6259	16.8545	16.378	16.4661	16.2781	18.5799	23.648	19.6379	19.622	21.2101	19.7562	18.0846	27.5624	24.9372	27.9476	29.604	28.9562
3435.58	19.2408	18.1494	17.5743	16.8245	16.3473	16.4234	16.2409	18.5519	23.6349	19.6211	19.6241	21.1619	19.7186	18.0787	27.53	24.8516	27.8422	29.5293	28.9518
3437.28	19.2014	18.082	17.5621	16.8186	16.3214	16.3984	16.2365	18.5323	23.6316	19.5896	19.6276	21.1013	19.6883	18.0731	27.4951	24.8242	27.7953	29.4769	28.9142
3438.98	19.1496	18.0019	17.567	16.793	16.3056	16.3614	16.2349	18.5299	23.6138	19.5427	19.6169	21.0767	19.6263	18.0549	27.4437	24.8211	27.792	29.4281	28.8678
3440.68	19.0927	17.9605	17.5704	16.768	16.2741	16.3323	16.2284	18.5263	23.5893	19.4996	19.597	21.059	19.588	17.9923	27.3863	24.8143	27.7927	29.3774	28.8323
3442.39	19.0703	17.9422	17.5411	16.7583	16.2478	16.3208	16.1915	18.5212	23.5319	19.4328	19.5325	21.0412	19.5668	17.9157	27.3233	24.7868	27.7697	29.3276	28.7833
3444.08	19.0444	17.9316	17.45	16.7341	16.217	16.2955	16.1399	18.4891	23.4478	19.3493	19.4386	21.0067	19.5412	17.8684	27.222	24.6873	27.6893	29.2436	28.7387
3445.78	19.0224	17.9175	17.3789	16.7057	16.1763	16.2716	16.1122	18.4279	23.3917	19.3025	19.384	20.9089	19.5176	17.8244	27.1242	24.5932	27.6018	29.1633	28.701
3447.48	19.0218	17.8742	17.3549	16.6662	16.1429	16.2433	16.078	18.3694	23.358	19.2605	19.3451	20.8257	19.469	17.775	27.0726	24.5552	27.5241	29.1235	28.6469
3449.18	18.9864	17.8254	17.3337	16.6075	16.0849	16.1978	16.0373	18.2897	23.3216	19.218	19.3099	20.8001	19.4208	17.7134	27.0411	24.5242	27.434	29.0922	28.5935
3450.88	18.9429	17.7734	17.3165	16.5571	16.0248	16.1617	16.0167	18.2078	23.2653	19.1855	19.274	20.7862	19.3988	17.6397	27.0105	24.5	27.383	29.0442	28.4584
3452.58	18.8875	17.698	17.2787	16.5095	16.0079	16.1286	15.9942	18.1702	23.1798	19.1302	19.1995	20.7833	19.3684	17.5985	26.9402	24.4406	27.3802	28.9281	28.2655
3454.27	18.774	17.6436	17.2219	16.4588	15.997	16.0924	15.9626	18.1508	23.1055	19.0824	19.1353	20.7461	19.3387	17.5729	26.8354	24.3375	27.3836	28.7685	28.1818
3455.97	18.6923	17.6199	17.1716	16.4181	15.9741	16.0666	15.9018	18.1348	23.0549	19.0397	19.0996	20.6673	19.2744	17.5419	26.767	24.2703	27.3652	28.6909	28.1786
3457.66	18.6651	17.5984	17.1159	16.3706	15.9196	16.0371	15.8063	18.1052	23.0075	18.9707	19.0604	20.6145	19.147	17.5257	26.7127	24.2162	27.2917	28.6926	28.1838
3459.36	18.6414	17.5673	17.0639	16.3229	15.8202	16.0004	15.7363	18.0436	22.9717	18.9116	19.0324	20.5683	19.0625	17.4821	26.6537	24.1543	27.1912	28.7071	28.1573
3461.05	18.6262	17.4941	17.0179	16.2767	15.7419	15.9495	15.7001	17.9883	22.9267	18.8566	19.0026	20.5145	19.0343	17.4207	26.6153	24.1138	27.1111	28.6781	28.0568
3462.75	18.5947	17.4113	16.944	16.205	15.7016	15.8637	15.6681	17.9376	22.8585	18.793	18.9593	20.4665	19.0092	17.3883	26.5711	24.0726	27.0217	28.561	27.9556
3464.44	18.5453	17.3612	16.8802	16.1461	15.6679	15.7849	15.6321	17.8733	22.7842	18.7471	18.9102	20.3997	18.9871	17.3517	26.5246	24.034	26.9364	28.4417	27.8972
3466.14	18.488	17.3034	16.8303	16.1188	15.639	15.7372	15.571	17.8217	22.6828	18.6997	18.8156	20.3286	18.9507	17.3105	26.4535	23.9867	26.8855	28.3838	27.8383
3467.83	18.3783	17.2523	16.756	16.0926	15.5902	15.6978	15.5005	17.7648	22.5832	18.649	18.7121	20.2609	18.901	17.2661	26.3252	23.9041	26.8431	28.3344	27.7871
3469.52	18.2786	17.2233	16.701	16.0583	15.5315	15.6577	15.4438	17.7026	22.5308	18.6165	18.6606	20.1795	18.8429	17.1966	26.2146	23.8365	26.8059	28.2931	27.7293
3471.21	18.2527	17.1871	16.6576	15.9898	15.4902	15.5995	15.3837	17.6652	22.4888	18.5814	18.6129	20.1094	18.7637	17.1292	26.1345	23.7937	26.7422	28.2249	27.6531
3472.9	18.2452	17.1458	16.6035	15.901	15.438	15.5329	15.3297	17.6256	22.4491	18.5411	18.5703	20.0549	18.6819	17.0587	26.0491	23.7468	26.6458	28.1111	27.5895
3474.6	18.2358	17.0815	16.567	15.8481	15.3818	15.4921	15.2907	17.5738	22.3972	18.4755	18.5392	20.0007	18.6013	16.9803	25.9821	23.7037	26.5798	28.03	27.5262
3476.29	18.1871	16.9918	16.5233	15.8152	15.3211	15.4668	15.2505	17.5015	22.3066	18.3685	18.4872	19.9482	18.5104	16.9326	25.9126	23.6183	26.5281	27.9662	27.4591
3477.98	18.085	16.933	16.4701	15.7773	15.2264	15.435	15.2129	17.3939	22.2298	18.2851	18.4375	19.8603	18.4449	16.8947	25.8366	23.5033	26.4724	27.8946	27.3889
3479.67	17.9966	16.9068	16.4147	15.7275	15.1529	15.3827	15.1508	17.3065	22.1713	18.2322	18.3716	19.7588	18.4084	16.8534	25.7926	23.4367	26.4363	27.8345	27.2716
3481.35	17.9233	16.8803	16.3187	15.6383	15.1124	15.2898	15.0622	17.2498	22.1069	18.1751	18.2783	19.7165	18.3783	16.8296	25.7644	23.3891	26.3887	27.7507	27.1542
3483.04	17.8426	16.8354	16.2311	15.5545	15.0677	15.2039	15.0169	17.1915	22.0601	18.1279	18.2196	19.7187	18.3558	16.8083	25.7387	23.3358	26.3287	27.6608	27.0877
3484.73	17.7709	16.7288	16.1797	15.502	15.0367	15.1526	15.0223	17.1544	22.024	18.0901	18.1928	19.7226	18.3234	16.7798	25.6821	23.266	26.2484	27.5875	27.0334
3486.42	17.6952	16.6179	16.1229	15.4487	15.0156	15.1048	15.0361	17.1331	21.9846	18.0543	18.1656	19.6681	18.2796	16.7088	25.5594	23.16	26.1191	27.4946	26.9793
3488.1	17.6256	16.5633	16.0839	15.4054	14.9928	15.0637	15.0084	17.1149	21.9087	18.0024	18.1145	19.5361	18.2122	16.5755	25.4499	23.0798	26.0085	27.4033	26.9202
3489.79	17.5778	16.5273	16.0706	15.3634	14.9463	15.0193	14.9072	17.0803	21.7534	17.9152	18.0137	19.4262	18.0837	16.4623	25.3698	23.0384	25.9461	27.3199	26.8495
3491.48	17.5276	16.4927	16.0595	15.3079	14.8322	14.9648	14.8023	16.9794	21.6054	17.8353	17.9154	19.3693	17.9643	16.414	25.2789	22.9928	25.8928	27.2277	26.7789
3493.16	17.4776	16.4434	16.0208	15.252	14.7063	14.9155	14.7391	16.8683	21.5387	17.7853	17.8566	19.3192	17.9126	16.3895	25.21	22.9458	25.8434	27.1518	26.6448
3494.85	17.4265	16.3752	15.9091	15.1671	14.6326	14.8357	14.6784	16.8158	21.5039	17.7301	17.8058	19.2681	17.8783	16.3505	25.1604	22.8371	25.7629	27.0727	26.4788
3496.53	17.3598	16.3136	15.7735	15.0706	14.5767	14.7417	14.6132	16.7792	21.4721	17.6737	17.7594	19.1756	17.8404	16.2599	25.1088	22.6841	25.6611	26.9867	26.3818
3498.22	17.2925	16.2261	15.6931	15.0181	14.5356	14.6885	14.5355	16.7366	21.419	17.5833	17.6937	19.059	17.7603	16.1452	25.0487	22.5946	25.5939	26.9261	26.3112
3499.9	17.2113	16.113	15.6336	14.9882	14.5044	14.6349	14.4439	16.6668	21.3409	17.4507	17.6002	18.9909	17.6362	16.0722	24.943	22.531	25.5165	26.8551	26.257
3501.58	17.1148	16.0467	15.5869	14.9562	14.4611	14.5776	14.376	16.5615	21.2797	17.3665	17.5372	18.9562	17.5615	16.0241	24.8264	22.4648	25.433	26.7838	26.1983
3503.26	17.0428	15.9967	15.5427	14.9008	14.4173	14.5241	14.3265	16.4799	21.2094	17.3283	17.4952	18.925	17.5311	15.9803	24.7471	22.3869	25.372	26.7256	26.0786
3504.95	16.962	15.9425	15.4519	14.8016	14.3477	14.4522	14.281	16.4188	21.1233	17.2927	17.4499	18.8744	17.4986	15.9235	24.6702	22.2578	25.2916	26.6279	25.9821
3506.63	16.8783	15.8941	15.374	14.7066	14.2523	14.3874	14.2428	16.3534	21.0623	17.2566	17.4035	18.7902	17.446	15.8335	24.6027	22.1528	25.2203	26.5346	25.9491
3508.31	16.8253	15.8414	15.3164	14.6272	14.1885	14.329	14.1905	16.2974	20.9958	17.2005	17.323	18.7188	17.3363	15.7583	24.5432	22.1053	25.1542	26.4486	25.9275
3509.99	16.7559	15.784	15.2368	14.5417	14.1444	14.2558	14.1376	16.2165	20.9317	17.1439	17.2336	18.6425	17.218	15.7006	24.4717	22.0655	25.0633	26.3378	25.8946
3511.67	16.6861	15.7086	15.1804	14.4872	14.0994	14.196	14.0787	16.1282	20.8682	17.0739	17.1638	18.536	17.1366	15.6326	24.414	22.0302	24.9924	26.2638	25.8076
3513.35	16.6335	15.602	15.1327	14.4629	14.0432	14.1436	13.9844	16.0726	20.7647	16.9568	17.09	18.4593	17.0631	15.58	24.3591	21.9744	24.9418	26.2086	25.6941
3515.03	16.5684	15.5187	15.0739	14.443	13.9503	14.09	13.9047	16.02	20.6807	16.8619	17.0282	18.3939	17.0076	15.5255	24.2976	21.8997	24.8891	26.1413	25.6229
3516.71	16.5083	15.4597	15.0227	14.4067	13.8645	14.0427	13.8505	15.963	20.6204	16.8061	16.9732	18.3212	16.9711	15.4649	24.244	21.8509	24.8353	26.0834	25.5486
3518.39	16.4606	15.3918	14.9516	14.3165	13.8038	13.972	13.7934	15.896	20.5467	16.748	16.9079	18.2686	16.9315	15.4238	24.1612	21.8127	24.7645	26.0143	25.4707
3520.06	16.4122	15.3379	14.8752	14.2198	13.7435	13.8994	13.7507	15.8128	20.4978	16.7012	16.859	18.211	16.8909	15.3594	24.068	21.7698	24.6873	25.944	25.4047
3521.74	16.3621	15.2724	14.8055	14.1463	13.7018	13.8484	13.6969	15.7496	20.4477	16.6606	16.8164	18.1521	16.84	15.2881	24.0027	21.7109	24.6165	25.8953	25.3191
3523.42	16.2707	15.203	14.714	14.0497	13.6692	13.7951	13.6262	15.7065	20.3807	16.6205	16.7696	18.1106	16.7817	15.2464	23.931	21.615	24.5309	25.8405	25.2442
3525.09	16.1627	15.1559	14.6409	13.9849	13.6269	13.7513	13.5726	15.6643	20.3324	16.5851	16.7235	18.0644	16.7267	15.2008	23.8672	21.5258	24.4601	25.7895	25.1562
3526.77	16.0954	15.1002	14.5994	13.9777	13.5762	13.7157	13.5147	15.6245	20.2781	16.5334	16.6488	18.0238	16.6557	15.1582	23.7946	21.4562	24.3851	25.7186	25.0409
3528.44	16.0301	15.0487	14.5593	13.9795	13.4912	13.6691	13.4609	15.5672	20.2168	16.4773	16.5669	17.9442	16.583	15.0999	23.6888	21.3804	24.2775	25.6078	24.9703
3530.12	15.9714	15.0087	14.5261	13.9634	13.3972	13.6219	13.4179	15.507	20.1548	16.4158	16.5111	17.8102	16.5184	15.0089	23.6095	21.3161	24.1947	25.5163	24.9286
3531.79	15.9306	14.952	14.469	13.8867	13.3379	13.5592	13.3565	15.4538	20.0718	16.3249	16.4614	17.7148	16.4389	14.9347	23.5219	21.2418	24.1518	25.4428	24.8838
3533.47	15.8729	14.9012	14.3884	13.7742	13.2896	13.481	13.3076	15.3752	19.9983	16.2533	16.4153	17.6456	16.3722	14.8587	23.4142	21.1558	24.1203	25.371	24.833
3535.14	15.8198	14.8425	14.3207	13.6996	13.2422	13.4137	13.267	15.3036	19.925	16.2119	16.3595	17.576	16.3157	14.7759	23.3504	21.0992	24.0777	25.3166	24.7462
3536.81	15.778	14.7561	14.2238	13.65	13.1821	13.3418	13.2107	15.2559	19.8334	16.1688	16.2858	17.5312	16.2483	14.7268	23.2997	21.0561	23.9781	25.2438	24.6539
3538.49	15.7288	14.6862	14.1326	13.6084	13.0996	13.2742	13.1706	15.2015	19.7687	16.1295	16.2251	17.4877	16.1961	14.6896	23.2411	21.0165	23.8597	25.159	24.5742
3540.16	15.6809	14.617	14.094	13.5584	13.0413	13.2173	13.1248	15.1459	19.7083	16.0656	16.1618	17.4408	16.1483	14.651	23.1615	20.9543	23.7648	25.0685	24.4662
3541.83	15.6204	14.5445	14.0619	13.4586	13.004	13.141	13.0604	15.0776	19.6366	15.9783	16.0922	17.3796	16.0959	14.6037	23.0296	20.8261	23.649	24.9305	24.3808
3543.5	15.5518	14.4889	14.0367	13.3754	12.9633	13.0778	13.0019	14.9974	19.5853	15.9016	16.0416	17.2714	16.0446	14.5267	22.9149	20.7153	23.5584	24.8059	24.3072
3545.17	15.4933	14.4255	13.9987	13.3303	12.9196	13.0364	12.9257	14.9361	19.5242	15.8077	15.9799	17.1752	15.9611	14.4459	22.8402	20.6561	23.5123	24.7228	24.2084
3546.84	15.3982	14.3683	13.922	13.2738	12.8356	12.9887	12.8424	14.8776	19.4507	15.7106	15.91	17.1064	15.8726	14.3653	22.761	20.5929	23.4635	24.6419	24.1256
3548.51	15.3052	14.3267	13.8599	13.2253	12.7391	12.943	12.7689	14.8176	19.3621	15.6376	15.8409	17.0296	15.8041	14.2761	22.6855	20.5248	23.4128	24.5733	24.0054
3550.18	15.2563	14.2736	13.7982	13.175	12.6882	12.8699	12.6869	14.7573	19.2383	15.5653	15.7484	16.962	15.7223	14.2094	22.602	20.4219	23.329	24.4987	23.8694
3551.85	15.1961	14.2261	13.7207	13.1147	12.6564	12.7747	12.6162	14.669	19.1366	15.4995	15.6599	16.879	15.6421	14.1508	22.5155	20.3053	23.2217	24.4193	23.808
3553.51	15.1422	14.1785	13.667	13.0509	12.6173	12.7175	12.5554	14.5869	19.0699	15.4403	15.559	16.789	15.5692	14.0913	22.4569	20.2478	23.1478	24.3696	23.8046
3555.18	15.0963	14.1135	13.6023	12.9536	12.5477	12.6809	12.4917	14.5326	19.0095	15.3798	15.4352	16.7378	15.4958	14.0457	22.3929	20.215	23.0929	24.3306	23.8039
3556.85	15.0351	14.0485	13.5276	12.8599	12.4464	12.6405	12.4459	14.4842	18.9656	15.3317	15.3578	16.692	15.4452	13.9958	22.3277	20.1816	23.0431	24.2913	23.7314
3558.52	14.9794	13.9519	13.4566	12.8068	12.3759	12.5807	12.4072	14.4405	18.9109	15.2817	15.3287	16.6449	15.4103	13.9442	22.271	20.1308	22.9813	24.2278	23.5728
3560.18	14.9127	13.8456	13.3658	12.7552	12.3403	12.4815	12.3648	14.3866	18.8453	15.2301	15.3116	16.5957	15.3753	13.8938	22.1891	20.0341	22.8816	24.1038	23.4503
3561.85	14.8304	13.7841	13.2975	12.7102	12.307	12.4031	12.3202	14.3232	18.7854	15.1835	15.2864	16.5167	15.3262	13.8273	22.1097	19.9439	22.7909	23.9846	23.3897
3563.51	14.7525	13.7402	13.2639	12.6574	12.2616	12.3738	12.2518	14.2692	18.6813	15.106	15.2321	16.4421	15.2346	13.767	22.0422	19.8795	22.73	23.8922	23.3354
3565.18	14.6531	13.6988	13.2291	12.5752	12.1699	12.3574	12.1754	14.198	18.5704	15.0282	15.1694	16.3713	15.1329	13.7183	21.9673	19.8157	22.6746	23.7943	23.2851
3566.84	14.5647	13.6498	13.1915	12.5139	12.0659	12.3263	12.1016	14.1109	18.504	14.9802	15.1058	16.289	15.0409	13.6646	21.8979	19.7626	22.6277	23.7022	23.1871
3568.5	14.5257	13.5802	13.1154	12.475	11.9951	12.2356	12.0176	14.0305	18.4481	14.928	15.0265	16.2275	14.9395	13.6058	21.7961	19.6865	22.527	23.606	23.0703
3570.17	14.5038	13.5163	13.0118	12.4352	11.935	12.1179	11.9524	13.9458	18.3996	14.8738	14.9569	16.1619	14.865	13.5246	21.6835	19.5923	22.3951	23.5066	22.9972
3571.83	14.48	13.4483	12.9399	12.3845	11.8905	12.0551	11.9093	13.8784	18.3364	14.8011	14.905	16.0911	14.826	13.4353	21.6296	19.523	22.3213	23.4197	22.9198
3573.49	14.4203	13.3611	12.8743	12.2835	11.8725	12.0222	11.8703	13.8276	18.2528	14.7089	14.8582	16.0428	14.7941	13.369	21.5985	19.4571	22.2743	23.3197	22.8513
3575.15	14.3187	13.3021	12.8149	12.1835	11.8636	11.9877	11.8369	13.7742	18.1983	14.6514	14.8183	15.9874	14.7576	13.3057	21.5711	19.3927	22.227	23.2305	22.7995
3576.82	14.2341	13.26	12.7658	12.1339	11.8416	11.9369	11.7813	13.7335	18.1565	14.6225	14.7717	15.9306	14.7005	13.2549	21.5199	19.3246	22.1686	23.1829	22.7309
3578.48	14.1697	13.2199	12.6908	12.0981	11.7641	11.8498	11.7143	13.6777	18.1103	14.5943	14.7181	15.8759	14.6345	13.2265	21.4149	19.2342	22.0872	23.1471	22.6766
3580.14	14.1115	13.1836	12.6276	12.0665	11.6539	11.7829	11.6721	13.6014	18.064	14.5493	14.6619	15.8031	14.5879	13.1941	21.3381	19.1726	22.0144	23.1137	22.5976
3581.8	14.0682	13.12	12.5783	12.0196	11.5872	11.7465	11.631	13.553	17.9942	14.47	14.5868	15.7489	14.5517	13.1592	21.3092	19.1275	21.9234	23.0386	22.496
3583.46	14.0222	13.0594	12.516	11.9472	11.5462	11.7017	11.5909	13.5208	17.9301	14.398	14.5202	15.7073	14.5178	13.101	21.2797	19.0695	21.813	22.9304	22.4471
3585.11	13.972	13.018	12.4784	11.89	11.5084	11.6644	11.5466	13.4865	17.8748	14.3466	14.4681	15.6569	14.4564	13.0231	21.2359	19.0284	21.7556	22.8719	22.4097
3586.77	13.9109	12.9604	12.4586	11.8405	11.4682	11.6164	11.4822	13.4363	17.7987	14.2882	14.4049	15.614	14.3556	12.9705	21.1317	18.9805	21.7351	22.8468	22.3664
3588.43	13.8202	12.9106	12.4379	11.7889	11.4058	11.5549	11.4338	13.3554	17.7354	14.2386	14.3527	15.5185	14.2758	12.9181	21.0046	18.9259	21.7175	22.8205	22.308
3590.09	13.7491	12.8592	12.4096	11.7557	11.3566	11.5044	11.3771	13.28	17.6607	14.1864	14.2892	15.4046	14.2089	12.8615	20.928	18.8772	21.6881	22.7793	22.1793
3591.74	13.7102	12.7887	12.3398	11.7214	11.3179	11.4513	11.3013	13.2053	17.5613	14.1227	14.2069	15.352	14.1361	12.8178	20.8654	18.7835	21.625	22.7019	22.068
3593.4	13.6685	12.7286	12.2729	11.6844	11.2674	11.4031	11.2583	13.1191	17.4895	14.0695	14.1509	15.3158	14.0897	12.7605	20.8097	18.6948	21.5537	22.6174	22.0223
3595.06	13.6349	12.6642	12.2324	11.6373	11.2267	11.3622	11.224	13.0657	17.4304	14.0029	14.097	15.2802	14.0439	12.6999	20.7632	18.6506	21.4758	22.5365	21.9796
3596.71	13.571	12.6	12.1734	11.5618	11.1792	11.3082	11.1827	13.0342	17.3745	13.9308	14.0419	15.236	13.9906	12.642	20.708	18.6048	21.3717	22.4379	21.9327
3598.37	13.4954	12.5508	12.1223	11.4944	11.1198	11.259	11.1404	13.0029	17.3366	13.8923	14.0113	15.1678	13.9393	12.5772	20.6531	18.56	21.2893	22.3522	21.8421
3600.02	13.456	12.4893	12.0767	11.433	11.068	11.202	11.0777	12.9743	17.2979	13.8749	13.9839	15.1032	13.8715	12.5276	20.5834	18.4884	21.2364	22.2573	21.73
3601.68	13.4008	12.4334	12.0137	11.3592	11.009	11.126	11.0169	12.9274	17.2593	13.8552	13.9537	15.0191	13.8148	12.4871	20.5025	18.3953	21.1895	22.1504	21.6574
3603.33	13.3438	12.3945	11.9569	11.3109	10.9535	11.0734	10.9687	12.8766	17.1889	13.8039	13.8921	14.9194	13.7806	12.4443	20.4404	18.332	21.141	22.0767	21.5794
3604.98	13.2949	12.3526	11.9038	11.2803	10.9103	11.0273	10.9177	12.8233	17.0786	13.721	13.7933	14.8516	13.7466	12.4044	20.3567	18.2747	21.0612	22.0151	21.5056
3606.64	13.215	12.3112	11.8504	11.2509	10.8623	10.9763	10.8671	12.7526	16.9976	13.6516	13.7201	14.792	13.7108	12.356	20.267	18.2215	20.9787	21.9592	21.4574
3608.29	13.156	12.2638	11.8001	11.2159	10.8136	10.9407	10.7908	12.7007	16.9497	13.5808	13.6775	14.7388	13.6573	12.3057	20.2091	18.1738	20.9291	21.9154	21.4072
3609.94	13.1297	12.2094	11.7429	11.151	10.7467	10.9038	10.7027	12.6608	16.9077	13.5039	13.6447	14.6997	13.5924	12.256	20.1563	18.0892	20.8784	21.8635	21.3635
3611.59	13.1022	12.1567	11.6927	11.0891	10.6641	10.8647	10.6608	12.6133	16.8614	13.4549	13.6167	14.6476	13.5387	12.1849	20.1108	18.0132	20.8392	21.8177	21.3073
3613.24	13.0748	12.0867	11.6462	11.0415	10.6113	10.8037	10.654	12.5796	16.7838	13.4139	13.5672	14.5994	13.4689	12.119	20.0438	17.9484	20.7957	21.7556	21.2332
3614.89	13.0077	12.0192	11.5852	10.9821	10.5775	10.7052	10.6492	12.5449	16.7034	13.3739	13.5156	14.5522	13.3964	12.0658	19.9445	17.8652	20.7214	21.6656	21.1794
3616.54	12.924	11.9734	11.5373	10.9354	10.5465	10.6427	10.6156	12.499	16.6413	13.3221	13.4646	14.4939	13.3421	12.0122	19.8722	17.8011	20.6461	21.6052	21.1104
3618.19	12.8691	11.9151	11.4898	10.8936	10.5071	10.6299	10.5455	12.4428	16.5746	13.2393	13.3863	14.448	13.2846	11.9735	19.8123	17.7469	20.5347	21.5412	21.0312
3619.84	12.8218	11.8611	11.4286	10.8407	10.4369	10.6247	10.4846	12.3657	16.5232	13.1675	13.3235	14.393	13.2317	11.9206	19.7509	17.6956	20.4165	21.4639	20.9671
3621.49	12.778	11.816	11.3844	10.7939	10.3686	10.6127	10.4352	12.2909	16.4917	13.1202	13.2753	14.3298	13.167	11.8556	19.7006	17.656	20.3694	21.4044	20.8776
3623.14	12.7327	11.7652	11.3384	10.7415	10.3185	10.565	10.3816	12.2171	16.4615	13.0797	13.22	14.2811	13.0888	11.803	19.63	17.5789	20.3527	21.324	20.7979
3624.78	12.675	11.725	11.291	10.6912	10.2709	10.5052	10.3384	12.1357	16.4254	13.0466	13.1817	14.2219	13.0417	11.7308	19.5589	17.5025	20.3356	21.248	20.7353
3626.43	12.622	11.675	11.2517	10.6532	10.2317	10.4477	10.2893	12.0844	16.3329	13.0009	13.1434	14.1634	13.0101	11.661	19.497	17.4588	20.2739	21.1912	20.6481
3628.08	12.5547	11.6146	11.2004	10.6099	10.1905	10.3631	10.2383	12.054	16.2166	12.9445	13.0984	14.106	12.976	11.6165	19.4144	17.4032	20.1433	21.113	20.5811
3629.72	12.4746	11.5679	11.1545	10.5672	10.1438	10.2932	10.1992	12.0199	16.1512	12.8889	13.0532	14.0247	12.9398	11.5728	19.3458	17.3528	20.0428	21.0521	20.4813
3631.37	12.4216	11.5126	11.1144	10.5166	10.1014	10.2554	10.144	11.9765	16.1034	12.8183	12.986	13.9542	12.8832	11.536	19.2845	17.2695	19.9871	20.9821	20.3586
3633.01	12.3833	11.4596	11.0612	10.4479	10.0501	10.2206	10.0892	11.9022	16.0645	12.757	12.9197	13.8884	12.8261	11.4771	19.2177	17.1594	19.9377	20.888	20.3007
3634.66	12.3481	11.4208	10.9997	10.3888	10.0041	10.1821	10.0279	11.8245	15.9983	12.7	12.8444	13.8205	12.7509	11.3977	19.1687	17.1028	19.9006	20.818	20.2696
3636.3	12.3087	11.3766	10.9095	10.327	9.9573	10.1127	9.94636	11.7501	15.8851	12.629	12.7444	13.7774	12.645	11.3435	19.1165	17.0926	19.8121	20.7321	20.2424
3637.95	12.245	11.3293	10.8071	10.2608	9.88556	10.0281	9.89633	11.6582	15.8084	12.5841	12.6766	13.7386	12.5753	11.3097	19.0583	17.0888	19.7003	20.6453	20.2097
3639.59	12.1843	11.2608	10.7377	10.2118	9.82816	9.97182	9.8749	11.5984	15.7714	12.5572	12.6393	13.6962	12.5399	11.2808	18.9947	17.0493	19.6215	20.5989	20.1522
3641.23	12.1278	11.1708	10.6864	10.1552	9.79677	9.92591	9.85734	11.5877	15.7382	12.5293	12.6058	13.639	12.5052	11.2449	18.8996	16.9468	19.5425	20.558	20.0954
3642.87	12.0554	11.106	10.6478	10.1026	9.7699	9.88008	9.83635	11.5883	15.7021	12.5005	12.5726	13.5343	12.4626	11.191	18.8161	16.8501	19.48	20.5139	20.0172
3644.52	11.9988	11.0561	10.6274	10.067	9.74164	9.83949	9.77589	11.5611	15.643	12.4328	12.5192	13.4435	12.3908	11.143	18.7498	16.7813	19.4395	20.4279	19.9092
3646.16	11.9387	11.0095	10.6132	10.0295	9.69324	9.80114	9.70179	11.4647	15.5797	12.3539	12.4592	13.4083	12.3185	11.1008	18.6758	16.7086	19.3984	20.3025	19.8328
3647.8	11.8731	10.9698	10.5939	9.98928	9.63778	9.76082	9.64542	11.3513	15.5136	12.2955	12.4059	13.3932	12.275	11.0474	18.6294	16.6606	19.363	20.2313	19.7713
3649.44	11.8265	10.9197	10.5536	9.93932	9.58667	9.7026	9.58619	11.3011	15.4234	12.2309	12.346	13.3724	12.2384	10.9995	18.5969	16.6241	19.3066	20.2045	19.7141
3651.08	11.7856	10.8707	10.4978	9.88378	9.51674	9.63242	9.53297	11.2874	15.3597	12.174	12.2961	13.3144	12.2074	10.9425	18.5651	16.5874	19.2458	20.1822	19.6688
3652.72	11.7435	10.818	10.4383	9.83327	9.45612	9.58065	9.49599	11.2728	15.3379	12.1332	12.2464	13.2405	12.1633	10.8814	18.5372	16.5509	19.2192	20.1506	19.6158
3654.36	11.6908	10.7455	10.3469	9.76385	9.41374	9.53078	9.4645	11.2364	15.3253	12.0955	12.1878	13.1883	12.1014	10.8352	18.4833	16.4735	19.1847	20.0888	19.5665
3656	11.6194	10.6949	10.2574	9.69505	9.36786	9.48108	9.42914	11.1773	15.3003	12.0574	12.1435	13.1302	12.0515	10.7751	18.4246	16.3991	19.1398	20.0183	19.5107
3657.63	11.5591	10.6589	10.2184	9.66022	9.3325	9.45549	9.38357	11.135	15.2087	12.003	12.0918	13.0724	11.9799	10.7199	18.3608	16.3624	19.0772	19.9381	19.4312
3659.27	11.5031	10.6161	10.1945	9.63318	9.29149	9.44505	9.33702	11.1112	15.0921	11.937	12.0316	13.0206	11.8973	10.6758	18.2625	16.324	18.983	19.8249	19.3718
3660.91	11.4408	10.5755	10.1689	9.60214	9.23708	9.42648	9.2903	11.0896	15.0252	11.8639	11.9751	12.957	11.8451	10.6132	18.1903	16.2862	18.9115	19.7386	19.3152
3662.55	11.4006	10.5133	10.1216	9.55755	9.18257	9.37145	9.22406	11.045	14.9701	11.769	11.9046	12.8914	11.7975	10.5585	18.1319	16.2151	18.8604	19.6688	19.25
3664.18	11.37	10.4501	10.0452	9.49827	9.11246	9.28403	9.16171	10.9424	14.9188	11.6919	11.8446	12.8068	11.7508	10.5066	18.0661	16.1204	18.8081	19.5945	19.1897
3665.82	11.3406	10.4054	9.98281	9.44554	9.04171	9.21542	9.11476	10.839	14.8656	11.6428	11.8098	12.7144	11.6915	10.4472	18.0187	16.0585	18.7615	19.538	19.0914
3667.45	11.3054	10.3562	9.9352	9.39114	8.9888	9.16497	9.06821	10.7849	14.7978	11.5968	11.7779	12.6525	11.6122	10.3902	17.9652	16.0154	18.6721	19.4678	19.0008
3669.09	11.2359	10.3073	9.88565	9.33251	8.94244	9.11577	9.0264	10.7475	14.7417	11.5645	11.7351	12.5767	11.5508	10.3179	17.9056	15.9735	18.5749	19.3993	18.9499
3670.72	11.1672	10.2414	9.82843	9.27759	8.90224	9.07123	8.9573	10.7117	14.6955	11.5293	11.6574	12.5118	11.4999	10.2485	17.8383	15.9155	18.5126	19.3536	18.8873
3672.36	11.0986	10.156	9.74456	9.20524	8.86616	9.0106	8.87639	10.6571	14.6477	11.4837	11.5683	12.4895	11.4488	10.2038	17.7367	15.821	18.4404	19.2989	18.8323
3673.99	11.0044	10.1005	9.66761	9.14564	8.82807	8.956	8.83868	10.5858	14.5898	11.4352	11.5163	12.4606	11.4029	10.1647	17.6493	15.7319	18.3707	19.2543	18.7286
3675.62	10.9369	10.0691	9.61053	9.11204	8.78203	8.9173	8.82255	10.5357	14.5019	11.3609	11.4782	12.4314	11.3426	10.1316	17.5668	15.6434	18.2869	19.1865	18.5902
3677.25	10.8861	10.0399	9.54992	9.07201	8.71454	8.87147	8.80688	10.4972	14.4206	11.2875	11.4497	12.3781	11.2879	10.0812	17.4657	15.5436	18.1826	19.0804	18.5287
3678.89	10.8384	10.0018	9.51125	9.03167	8.64389	8.82836	8.76852	10.4583	14.3591	11.2354	11.4019	12.2939	11.2454	10.0133	17.3896	15.4769	18.103	18.9978	18.5038
3680.52	10.804	9.9378	9.48724	8.98161	8.58826	8.78545	8.69742	10.402	14.2895	11.1848	11.3087	12.2264	11.1924	9.97028	17.3053	15.4142	18.0424	18.9157	18.4767
3682.15	10.7607	9.87355	9.45673	8.91946	8.53465	8.73765	8.63649	10.3129	14.2364	11.1436	11.2356	12.1543	11.1465	9.93596	17.2221	15.3508	17.9813	18.8305	18.4166
3683.78	10.7189	9.81592	9.42061	8.86704	8.49062	8.68859	8.59006	10.2393	14.1897	11.1024	11.1868	12.0815	11.0905	9.89973	17.1673	15.2985	17.9025	18.7561	18.2843
3685.41	10.6797	9.74942	9.35622	8.81788	8.45079	8.62641	8.54338	10.1887	14.1386	11.0553	11.1353	12.0282	11.0183	9.85642	17.0952	15.2275	17.7932	18.6611	18.1755
3687.04	10.622	9.70145	9.28796	8.77192	8.40481	8.56493	8.49491	10.137	14.0952	11.0139	11.0835	11.9673	10.9572	9.77616	17.0342	15.1628	17.7099	18.5795	18.1117
3688.67	10.5751	9.65799	9.24537	8.72789	8.364	8.51712	8.42153	10.0939	14.0032	10.9572	11.0148	11.907	10.8916	9.70729	16.9882	15.1179	17.6681	18.5204	18.0419
3690.3	10.5235	9.61243	9.21084	8.67322	8.31363	8.46988	8.34909	10.0487	13.9046	10.8955	10.9463	11.843	10.8312	9.66877	16.9293	15.0683	17.622	18.4594	17.996
3691.92	10.4605	9.57938	9.17534	8.63009	8.25946	8.43003	8.30764	9.9992	13.8508	10.8438	10.896	11.7709	10.7855	9.62755	16.8872	15.0105	17.5845	18.4243	17.9329
3693.55	10.4204	9.52446	9.12538	8.59585	8.21655	8.38815	8.27388	9.95135	13.7945	10.7873	10.8476	11.7274	10.7318	9.59738	16.8533	14.9236	17.5368	18.3959	17.8676
3695.18	10.3713	9.47346	9.06313	8.55221	8.16638	8.33827	8.24909	9.89438	13.7556	10.738	10.8143	11.706	10.6913	9.5626	16.8159	14.8313	17.4797	18.3596	17.8321
3696.81	10.3204	9.44258	9.01602	8.50739	8.12285	8.30256	8.22088	9.84457	13.731	10.6998	10.7944	11.6876	10.6543	9.52136	16.77	14.7748	17.4223	18.3121	17.7796
3698.43	10.2821	9.3976	8.9738	8.449	8.09247	8.26262	8.18283	9.81289	13.6971	10.6628	10.7726	11.6574	10.6054	9.48312	16.6721	14.7363	17.3115	18.2112	17.7209
3700.06	10.2285	9.35858	8.93608	8.39139	8.05908	8.21697	8.15527	9.78657	13.6638	10.6238	10.7452	11.5739	10.5635	9.42149	16.5703	14.7023	17.2093	18.1082	17.6494
3701.68	10.1813	9.31387	8.90985	8.35502	8.02467	8.18314	8.11774	9.75823	13.5976	10.5561	10.6681	11.4899	10.5197	9.36204	16.4945	14.6613	17.164	18.029	17.5572
3703.31	10.1389	9.25531	8.86922	8.32108	7.97916	8.14433	8.07417	9.70927	13.5191	10.4803	10.5754	11.4434	10.4722	9.3191	16.4122	14.6089	17.1251	17.935	17.495
3704.93	10.0871	9.21387	8.82943	8.29528	7.92651	8.10808	8.04073	9.64875	13.4699	10.4364	10.5323	11.4011	10.4276	9.27169	16.355	14.5616	17.0854	17.8756	17.4471
3706.56	10.0496	9.17525	8.77841	8.27463	7.88754	8.06241	8.0006	9.59794	13.423	10.4093	10.5108	11.3735	10.3808	9.24074	16.3111	14.4844	16.9959	17.8171	17.4002
3708.18	10.0097	9.14049	8.70135	8.24573	7.85831	7.99594	7.96261	9.53884	13.3788	10.3841	10.4875	11.3379	10.3444	9.21547	16.2704	14.3951	16.8936	17.7475	17.3612
3709.8	9.9679	9.11166	8.65618	8.21456	7.83276	7.95231	7.93672	9.49258	13.3234	10.3397	10.4409	11.295	10.3106	9.18725	16.2457	14.3561	16.8694	17.7082	17.2997
3711.43	9.93432	9.06499	8.63779	8.15924	7.79947	7.92636	7.91671	9.46237	13.254	10.2812	10.3777	11.2735	10.2692	9.16184	16.2002	14.3443	16.8974	17.6745	17.241
3713.05	9.88629	9.02545	8.61648	8.09512	7.75583	7.89835	7.90051	9.42327	13.212	10.249	10.3438	11.2602	10.237	9.09845	16.1536	14.3321	16.9264	17.642	17.1949
3714.67	9.84257	8.99913	8.59192	8.06082	7.72653	7.87167	7.86651	9.39697	13.1869	10.2227	10.3252	11.2433	10.1917	9.0349	16.1171	14.3009	16.9022	17.6073	17.1375
3716.29	9.80987	8.96753	8.54984	8.03092	7.71039	7.83335	7.82221	9.37606	13.164	10.1957	10.3071	11.2085	10.1413	9.00992	16.0575	14.2524	16.8145	17.5525	17.0866
3717.91	9.77111	8.9322	8.51229	8.0027	7.69511	7.80157	7.78438	9.34864	13.1328	10.1785	10.2825	11.1498	10.1123	8.99445	16.0081	14.2145	16.7501	17.4968	17.0189
3719.53	9.739	8.87776	8.49344	7.98334	7.6773	7.78438	7.7333	9.32758	13.0647	10.1452	10.2241	11.1029	10.0833	8.98022	15.955	14.1743	16.7049	17.4259	16.9492
3721.15	9.71158	8.82954	8.48085	7.96335	7.64727	7.76669	7.68996	9.30624	13.006	10.117	10.1715	11.0671	10.0594	8.95674	15.8967	14.1267	16.6498	17.3479	16.9238
3722.77	9.68464	8.81989	8.46885	7.94522	7.61565	7.75107	7.66649	9.28104	12.9859	10.0909	10.1535	11.031	10.055	8.92604	15.8767	14.0971	16.6134	17.3052	16.9205
3724.39	9.65863	8.8275	8.44178	7.92675	7.58921	7.72872	7.64626	9.24943	12.974	10.0474	10.1445	11.0073	10.0574	8.8992	15.8899	14.0487	16.5624	17.2814	16.9159
3726.01	9.62416	8.82938	8.40489	7.90741	7.56016	7.70131	7.62984	9.20971	12.9562	10.0154	10.1308	10.9823	10.0495	8.86866	15.9023	14.0026	16.5122	17.2615	16.8843
3727.63	9.59351	8.7968	8.39034	7.88254	7.53917	7.67794	7.61299	9.17911	12.9098	9.99317	10.0813	10.9585	10.015	8.83898	15.8648	13.979	16.4845	17.2225	16.8166
3729.25	9.56854	8.73316	8.39606	7.83956	7.51104	7.64244	7.59606	9.14176	12.8537	9.97083	10.0185	10.9337	9.96811	8.80826	15.7564	13.9404	16.4558	17.1398	16.7585
3730.86	9.53248	8.69583	8.39587	7.8019	7.47232	7.6083	7.58338	9.0974	12.8243	9.95078	9.9913	10.8886	9.9252	8.7601	15.6759	13.9126	16.4308	17.0847	16.7068
3732.48	9.50513	8.68749	8.36235	7.77548	7.44683	7.58442	7.56559	9.08304	12.7939	9.92822	9.97553	10.8483	9.85738	8.72715	15.6509	13.8924	16.3738	17.0656	16.6561
3734.1	9.48352	8.68038	8.29652	7.73842	7.4233	7.55613	7.55273	9.09645	12.7681	9.91074	9.96323	10.8125	9.79903	8.71206	15.6295	13.8615	16.2907	17.0446	16.6288
3735.71	9.4605	8.66762	8.24748	7.7139	7.4028	7.53743	7.54317	9.10999	12.7447	9.89133	9.95219	10.7728	9.77816	8.69638	15.5996	13.8273	16.2501	17.0298	16.586
3737.33	9.44177	8.64943	8.22439	7.70267	7.39816	7.51988	7.52331	9.08918	12.7062	9.85936	9.93225	10.7459	9.76851	8.68486	15.5312	13.7527	16.2351	16.9949	16.541
3738.94	9.41016	8.63089	8.20656	7.68991	7.39857	7.49628	7.50487	9.03174	12.6789	9.83414	9.91388	10.7157	9.76306	8.65967	15.4597	13.6797	16.2239	16.9525	16.5036
3740.56	9.3813	8.60349	8.19126	7.68209	7.39389	7.48175	7.47748	8.9901	12.6381	9.81351	9.88097	10.6878	9.75192	8.63546	15.4209	13.6562	16.1978	16.9035	16.4537
3742.17	9.36946	8.55909	8.16586	7.67636	7.3679	7.46249	7.44659	8.96364	12.5861	9.79169	9.84023	10.6643	9.73349	8.6274	15.3874	13.6456	16.1353	16.8065	16.4185
3743.78	9.35695	8.53095	8.14172	7.67024	7.32901	7.44387	7.43364	8.93497	12.5574	9.76727	9.81875	10.6187	9.71211	8.6135	15.3704	13.6416	16.0938	16.7478	16.3918
3745.4	9.34419	8.51307	8.12626	7.64954	7.31034	7.43583	7.42012	8.92046	12.5265	9.7176	9.79959	10.5845	9.67271	8.60131	15.3777	13.6233	16.0911	16.7508	16.3625
3747.01	9.31713	8.49215	8.10772	7.60692	7.30777	7.42627	7.40601	8.91243	12.5014	9.67285	9.78245	10.5779	9.63355	8.58254	15.3907	13.588	16.0919	16.7544	16.3453
3748.62	9.28001	8.47828	8.09392	7.57975	7.30603	7.41599	7.39714	8.90416	12.4887	9.65802	9.75601	10.5768	9.61315	8.55027	15.3855	13.5648	16.088	16.7429	16.319
3750.23	9.26106	8.45938	8.07514	7.5679	7.28815	7.38676	7.38449	8.87993	12.4687	9.65037	9.70888	10.5666	9.59815	8.52117	15.3189	13.5146	16.0554	16.6886	16.2881
3751.84	9.2574	8.43797	8.04617	7.55134	7.24702	7.3408	7.36694	8.82706	12.4522	9.64385	9.68053	10.5191	9.58284	8.47105	15.2381	13.4646	16.0165	16.6313	16.252
3753.45	9.2529	8.41178	8.02856	7.54175	7.21275	7.32091	7.33067	8.79104	12.4234	9.63534	9.67319	10.4679	9.54653	8.42393	15.1997	13.4549	15.9863	16.6007	16.1976
3755.07	9.22276	8.37433	8.0146	7.52891	7.19431	7.31854	7.28573	8.77669	12.3865	9.62346	9.66946	10.4458	9.49893	8.41221	15.1773	13.449	15.9219	16.5444	16.1568
3756.68	9.14912	8.35289	8.00034	7.51457	7.181	7.31348	7.26073	8.76276	12.3669	9.60881	9.66144	10.4197	9.47221	8.4085	15.1523	13.4433	15.8585	16.5057	16.107
3758.28	9.09586	8.34934	7.98536	7.50281	7.17382	7.29165	7.25264	8.7556	12.3314	9.57751	9.62815	10.4048	9.45747	8.40133	15.1037	13.4161	15.7869	16.4781	16.0437
3759.89	9.08993	8.34464	7.96013	7.48251	7.17247	7.24356	7.24806	8.74549	12.2998	9.54215	9.59652	10.3931	9.44619	8.36769	15.0415	13.3645	15.701	16.4371	16.0163
3761.5	9.0957	8.33087	7.94148	7.46044	7.17134	7.21018	7.22709	8.73081	12.2678	9.50433	9.57577	10.3696	9.42222	8.31572	14.999	13.3251	15.6666	16.429	15.9815
3763.11	9.09618	8.29301	7.93476	7.43195	7.15238	7.20345	7.18663	8.70866	12.2027	9.45289	9.54149	10.3558	9.37921	8.29224	14.9666	13.2628	15.6625	16.421	15.9492
3764.72	9.07588	8.25561	7.92985	7.39638	7.10829	7.19976	7.15645	8.66936	12.1642	9.4173	9.52428	10.3279	9.35412	8.29345	14.9393	13.2019	15.6637	16.3995	15.9313
3766.32	9.05077	8.23611	7.91451	7.37	7.0747	7.18679	7.14335	8.63743	12.1549	9.39293	9.51428	10.2947	9.3434	8.29829	14.9174	13.1817	15.655	16.36	15.8963
3767.93	9.03798	8.21628	7.87337	7.3435	7.05521	7.15717	7.13702	8.61766	12.1495	9.36938	9.49588	10.2761	9.33385	8.29013	14.8859	13.1677	15.6119	16.2777	15.8675
3769.54	9.02781	8.19609	7.8346	7.32082	7.03565	7.1332	7.12993	8.59858	12.1444	9.3531	9.47291	10.2578	9.32673	8.25811	14.8575	13.1561	15.5806	16.2145	15.8506
3771.14	9.02	8.16249	7.81822	7.3152	7.02249	7.12577	7.10514	8.58198	12.107	9.3317	9.41903	10.2406	9.29686	8.23258	14.8098	13.1372	15.5593	16.191	15.8321
3772.75	8.98493	8.12422	7.80061	7.3157	6.99928	7.11683	7.08138	8.55473	12.0656	9.31382	9.36765	10.2129	9.2692	8.22324	14.7408	13.1054	15.5194	16.1709	15.8015
3774.35	8.92379	8.11313	7.78657	7.31572	6.97274	7.10828	7.07169	8.52703	12.0262	9.30248	9.3513	10.1713	9.25777	8.21159	14.7133	13.0681	15.4892	16.1517	15.7388
3775.96	8.89924	8.11942	7.76132	7.30373	6.96398	7.0897	7.058	8.52193	11.9569	9.28246	9.34584	10.138	9.23389	8.19503	14.7067	12.993	15.4268	16.1079	15.6768
3777.56	8.88544	8.12495	7.71689	7.27907	6.96379	7.05809	7.04343	8.52901	11.9054	9.26238	9.34596	10.101	9.21549	8.15185	14.6975	12.9151	15.3571	16.0599	15.6354
3779.16	8.8691	8.10691	7.69066	7.25944	6.96493	7.03789	7.01791	8.53244	11.8769	9.239	9.33264	10.0676	9.16716	8.10683	14.6678	12.8773	15.3115	16.0255	15.5912
3780.77	8.85323	8.05076	7.67922	7.24002	6.94436	7.01885	6.98644	8.49654	11.8555	9.21045	9.30755	10.05	9.10357	8.09016	14.5953	12.8501	15.2496	15.9742	15.5609
3782.37	8.81618	8.01248	7.6719	7.21862	6.90697	6.99745	6.96968	8.43306	11.8433	9.18327	9.29036	10.0331	9.09049	8.08332	14.5489	12.8347	15.2182	15.9374	15.5462
3783.97	8.78977	8.00913	7.6567	7.19369	6.89268	6.97732	6.95784	8.40251	11.8199	9.15162	9.26673	10.025	9.09928	8.07622	14.544	12.8378	15.2275	15.9064	15.5326
3785.57	8.7881	8.01187	7.61817	7.1588	6.89107	6.9483	6.9468	8.39138	11.8009	9.12343	9.24607	10.0138	9.1074	8.05463	14.5375	12.8494	15.2364	15.8632	15.5062
3787.17	8.788	8.00795	7.59121	7.13961	6.88562	6.93079	6.92952	8.38463	11.7963	9.10341	9.22884	9.98739	9.08589	8.02279	14.5282	12.8445	15.2315	15.8395	15.4525
3788.78	8.78035	7.97311	7.58453	7.13833	6.87133	6.92684	6.90302	8.3784	11.7852	9.08317	9.19742	9.96096	9.02474	8.00389	14.4712	12.7942	15.1812	15.782	15.4035
3790.38	8.75026	7.93742	7.57949	7.13724	6.84537	6.92091	6.89195	8.35639	11.7761	9.06912	9.17185	9.89971	8.98702	7.99159	14.4088	12.7328	15.1199	15.7204	15.3744
3791.98	8.71736	7.92246	7.57454	7.13458	6.82395	6.91411	6.8878	8.34012	11.7394	9.03757	9.13628	9.84	8.97339	7.98176	14.3909	12.6911	15.084	15.7068	15.3405
3793.57	8.70525	7.90254	7.55996	7.11834	6.80041	6.9025	6.88072	8.31617	11.6872	8.99816	9.09644	9.82712	8.96334	7.96848	14.3853	12.6485	15.0513	15.7182	15.3123
3795.17	8.69919	7.89096	7.54498	7.09664	6.77056	6.88792	6.87345	8.27492	11.6651	8.98626	9.0848	9.82774	8.95733	7.93551	14.3771	12.627	15.0266	15.7225	15.278
3796.77	8.68966	7.88757	7.53115	7.07071	6.7505	6.8692	6.84792	8.24172	11.6435	8.98222	9.08351	9.82736	8.93719	7.91539	14.334	12.6334	14.9983	15.6793	15.242
3798.37	8.65601	7.88177	7.50435	7.02979	6.73193	6.84345	6.81954	8.20189	11.6209	8.97951	9.07941	9.81027	8.91751	7.91027	14.2708	12.645	14.9644	15.6067	15.2246
3799.97	8.6047	7.86857	7.48335	7.00671	6.71468	6.82595	6.80095	8.16844	11.5874	8.97259	9.06454	9.7829	8.90618	7.89943	14.246	12.6434	14.9486	15.5608	15.2034
3801.56	8.57944	7.82627	7.46101	7.01165	6.70583	6.81413	6.78298	8.16587	11.5337	8.95425	9.03843	9.76929	8.88948	7.88948	14.2322	12.6097	14.9303	15.5193	15.1841
3803.16	8.57184	7.78812	7.42951	7.02246	6.70006	6.80185	6.77397	8.17482	11.5088	8.94031	9.01816	9.77092	8.87903	7.86464	14.2185	12.5702	14.9135	15.4842	15.1454
3804.76	8.567	7.77716	7.42381	7.02129	6.6975	6.79369	6.76131	8.18019	11.5064	8.92217	8.97914	9.77303	8.86033	7.83969	14.2081	12.5449	14.8965	15.4712	15.0637
3806.35	8.55612	7.76299	7.44328	6.9934	6.69077	6.77072	6.74518	8.17172	11.5029	8.89913	8.93224	9.75908	8.83394	7.83202	14.1889	12.5181	14.8488	15.4669	15.0176
3807.95	8.52203	7.75523	7.46171	6.96447	6.67871	6.7468	6.7395	8.15431	11.4927	8.88029	8.91925	9.72333	8.81566	7.82976	14.164	12.4995	14.8033	15.4561	15.0032
3809.54	8.49093	7.7392	7.44988	6.94949	6.67115	6.7441	6.73633	8.14291	11.4725	8.84814	8.93577	9.69189	8.79314	7.82655	14.108	12.4714	14.7521	15.4005	14.9836
3811.14	8.46277	7.71207	7.40556	6.93034	6.6661	6.74646	6.73112	8.12202	11.4532	8.81872	8.9502	9.65909	8.77627	7.81192	14.0353	12.4318	14.6914	15.3235	14.9703
3812.73	8.42816	7.70276	7.38015	6.91524	6.65934	6.74392	6.71992	8.10056	11.4331	8.79278	8.93904	9.61946	8.76237	7.79031	14.0063	12.414	14.6657	15.2972	14.9627
3814.33	8.4158	7.70247	7.39289	6.9067	6.64508	6.72898	6.70336	8.08985	11.4041	8.75787	8.91168	9.59797	8.73805	7.77554	14.0148	12.4112	14.6842	15.3068	14.9536
3815.92	8.40968	7.70007	7.41428	6.89824	6.62159	6.70725	6.69073	8.07564	11.3789	8.73739	8.88584	9.57869	8.71894	7.75626	14.0217	12.4053	14.7011	15.3136	14.9292
3817.51	8.4032	7.68731	7.40787	6.88972	6.60055	6.69607	6.68624	8.05939	11.3605	8.7523	8.85978	9.56238	8.71411	7.73785	13.991	12.3863	14.6881	15.3095	14.8902
3819.1	8.40124	7.66109	7.36064	6.8753	6.5824	6.69181	6.68189	8.04007	11.341	8.77473	8.83714	9.55664	8.71299	7.7212	13.9257	12.36	14.6708	15.3155	14.8517
3820.69	8.39857	7.63982	7.31615	6.85992	6.56533	6.6849	6.66241	8.01728	11.3132	8.76737	8.83044	9.55423	8.70385	7.69221	13.8833	12.3345	14.6465	15.2987	14.788
3822.29	8.39252	7.62366	7.30365	6.84061	6.55446	6.66968	6.61758	7.99677	11.2779	8.74328	8.83801	9.54432	8.69001	7.67168	13.8607	12.2913	14.5994	15.2175	14.7194
3823.88	8.37656	7.60687	7.30312	6.81089	6.54967	6.64479	6.58178	7.97551	11.2496	8.72105	8.83999	9.52785	8.67607	7.66481	13.8317	12.238	14.5426	15.1187	14.6966
3825.47	8.3535	7.59874	7.29616	6.79366	6.54518	6.62271	6.57676	7.95791	11.2303	8.70449	8.81188	9.51201	8.65483	7.65823	13.8087	12.2093	14.4979	15.0763	14.7035
3827.06	8.33662	7.60034	7.28016	6.80169	6.53937	6.60838	6.58232	7.94855	11.2107	8.68715	8.76427	9.49103	8.62535	7.64055	13.7917	12.1907	14.4322	15.051	14.6966
3828.65	8.32767	7.60032	7.2638	6.81698	6.53343	6.59881	6.5811	7.94293	11.1939	8.66978	8.73299	9.44654	8.60452	7.60022	13.7751	12.1772	14.3754	15.028	14.6551
3830.24	8.3193	7.58906	7.25272	6.81275	6.52465	6.59301	6.56942	7.93842	11.1618	8.6447	8.70287	9.40445	8.57906	7.56595	13.7636	12.1716	14.3634	15.0195	14.6024
3831.82	8.30246	7.57101	7.24379	6.7869	6.49835	6.58814	6.5525	7.93479	11.1246	8.61723	8.67202	9.3865	8.55082	7.56548	13.7614	12.1698	14.3772	15.0267	14.5655
3833.41	8.27409	7.55382	7.2339	6.76216	6.46338	6.58187	6.52989	7.92857	11.1041	8.59628	8.65692	9.37752	8.5352	7.58439	13.7435	12.1591	14.3686	15.0121	14.5449
3835	8.25127	7.52415	7.2076	6.74271	6.4474	6.5645	6.49311	7.91248	11.0918	8.57657	8.65607	9.36487	8.53072	7.5835	13.711	12.1379	14.3294	14.9714	14.5284
3836.59	8.23425	7.48763	7.16027	6.71978	6.45562	6.53395	6.46074	7.88318	11.0765	8.56182	8.65195	9.34873	8.52189	7.54853	13.6804	12.1138	14.2897	14.9304	14.51
3838.17	8.21525	7.46736	7.12925	6.70162	6.46131	6.51362	6.45949	7.85508	11.0579	8.55582	8.63297	9.33582	8.49881	7.5103	13.6605	12.0875	14.2633	14.9013	14.4862
3839.76	8.19927	7.4485	7.12295	6.68766	6.43958	6.51556	6.47599	7.84072	11.0398	8.55283	8.60879	9.32487	8.47168	7.49634	13.6557	12.0546	14.2396	14.8748	14.4663
3841.35	8.17582	7.43097	7.1201	6.67307	6.40232	6.52218	6.47377	7.8344	11.0209	8.54452	8.59363	9.31022	8.45515	7.49973	13.6475	12.0277	14.2229	14.8509	14.4555
3842.93	8.15285	7.41976	7.10491	6.65385	6.3771	6.50537	6.45368	7.82595	11.0125	8.52561	8.58865	9.2973	8.44421	7.50044	13.6117	12.0139	14.2302	14.8352	14.4496
3844.52	8.14485	7.41188	7.07504	6.62493	6.37212	6.46483	6.4341	7.82845	11.0056	8.50482	8.58768	9.28462	8.43295	7.48836	13.557	12.0044	14.2565	14.8281	14.4249
3846.1	8.14921	7.4021	7.04944	6.60194	6.37381	6.43201	6.4289	7.83604	10.9882	8.49149	8.58435	9.26509	8.41376	7.47244	13.5276	11.9853	14.2508	14.8095	14.3581
3847.69	8.14405	7.39586	7.05021	6.59885	6.36972	6.42252	6.43256	7.82602	10.9686	8.48046	8.57529	9.24386	8.38172	7.45688	13.5168	11.9338	14.1862	14.7534	14.2978
3849.27	8.10753	7.39045	7.07126	6.60662	6.36485	6.42335	6.43205	7.79683	10.9516	8.46834	8.56503	9.21076	8.35841	7.43247	13.5072	11.8811	14.1163	14.6958	14.2847
3850.85	8.06162	7.374	7.07616	6.6084	6.35857	6.4213	6.40612	7.77026	10.9227	8.43386	8.53458	9.18032	8.34115	7.40718	13.4923	11.8609	14.0835	14.6704	14.2924
3852.43	8.04574	7.34612	7.05634	6.60186	6.33551	6.41793	6.36865	7.73759	10.8852	8.38709	8.49057	9.16997	8.3214	7.39243	13.4635	11.8507	14.0542	14.646	14.2843
3854.02	8.06494	7.32424	7.03418	6.59518	6.30077	6.41612	6.35304	7.69501	10.8582	8.36224	8.46352	9.16159	8.30609	7.37697	13.4399	11.8397	14.0341	14.6298	14.2377
3855.6	8.08065	7.32128	7.0088	6.58202	6.28037	6.40099	6.34987	7.67224	10.8235	8.34599	8.43245	9.14812	8.29584	7.3615	13.4105	11.8216	14.0259	14.625	14.1819
3857.18	8.0634	7.32658	6.96746	6.55588	6.26127	6.36832	6.34666	7.66635	10.7922	8.33254	8.40411	9.11942	8.28436	7.33396	13.3657	11.8018	14.019	14.6203	14.1442
3858.76	8.03119	7.31747	6.93542	6.53576	6.24295	6.34377	6.32948	7.66374	10.7666	8.31423	8.38737	9.08431	8.25831	7.29608	13.341	11.7851	14.001	14.5967	14.1027
3860.34	8.00366	7.28097	6.92925	6.51175	6.23782	6.3384	6.29718	7.65528	10.73	8.28497	8.37014	9.07198	8.218	7.2816	13.3285	11.7574	13.9537	14.5226	14.0651
3861.92	7.96766	7.24339	6.9325	6.47453	6.23812	6.33717	6.27936	7.63769	10.7106	8.27046	8.36048	9.07926	8.19509	7.2887	13.3103	11.7345	13.9061	14.4499	14.0339
3863.5	7.92838	7.22628	6.93254	6.45841	6.23721	6.32618	6.27942	7.62437	10.7122	8.28253	8.34589	9.08396	8.18436	7.29673	13.264	11.7288	13.8742	14.4128	13.9997
3865.08	7.91065	7.21238	6.92864	6.45742	6.22512	6.30078	6.28318	7.61892	10.7163	8.29987	8.32606	9.06602	8.17634	7.28916	13.1833	11.7219	13.8365	14.3707	13.9804
3866.66	7.90544	7.20334	6.92633	6.45402	6.20539	6.27735	6.28172	7.61494	10.7029	8.29406	8.30967	9.02495	8.17532	7.2656	13.1338	11.7029	13.8128	14.3398	13.9695
3868.24	7.90009	7.19663	6.90594	6.45131	6.19149	6.27089	6.27027	7.60708	10.6476	8.25301	8.27721	8.99287	8.1734	7.24524	13.1259	11.6372	13.7951	14.3208	13.9557
3869.82	7.88941	7.18779	6.85857	6.44832	6.17318	6.27491	6.25701	7.58136	10.5974	8.211	8.2481	8.96693	8.16878	7.21796	13.1218	11.5542	13.7746	14.3029	13.9186
3871.39	7.87891	7.17892	6.82893	6.44044	6.15707	6.27485	6.23827	7.554	10.5762	8.18375	8.23501	8.93641	8.15271	7.18314	13.1059	11.5219	13.7554	14.2819	13.8449
3872.97	7.87007	7.15736	6.83069	6.4136	6.15132	6.25653	6.20966	7.53633	10.555	8.15709	8.22333	8.91899	8.12302	7.16871	13.0638	11.5125	13.7109	14.2506	13.797
3874.55	7.84773	7.13779	6.83761	6.37695	6.14471	6.22932	6.19016	7.51464	10.5331	8.14162	8.20951	8.90832	8.09814	7.1629	13.0252	11.5054	13.6708	14.2194	13.7873
3876.12	7.82123	7.12848	6.82874	6.36508	6.13432	6.2125	6.17274	7.49488	10.5027	8.12103	8.18568	8.89603	8.05796	7.15606	13.0024	11.4883	13.6319	14.1847	13.7784
3877.7	7.80386	7.10824	6.79484	6.37527	6.10676	6.19335	6.15739	7.47777	10.4721	8.09807	8.1625	8.86464	8.01883	7.13569	12.9779	11.4589	13.5654	14.1404	13.7619
3879.27	7.77725	7.09134	6.76215	6.38061	6.0717	6.17272	6.15055	7.46103	10.4516	8.0811	8.14848	8.81304	8.01442	7.0997	12.9482	11.4357	13.5289	14.1096	13.7226
3880.85	7.75689	7.07508	6.74681	6.35729	6.05115	6.15603	6.14469	7.44502	10.4304	8.0543	8.1251	8.78631	8.03254	7.0776	12.8918	11.4065	13.5172	14.0733	13.6826
3882.42	7.74061	7.05342	6.73765	6.3108	6.03391	6.13621	6.1401	7.42297	10.4137	8.03228	8.10938	8.77614	8.04383	7.06029	12.8349	11.3766	13.5052	14.0339	13.6491
3884	7.71743	7.03489	6.72806	6.28246	6.02218	6.12675	6.12772	7.40463	10.4002	8.01047	8.09928	8.7652	8.01836	7.042	12.8114	11.3586	13.4795	14.0096	13.6077
3885.57	7.70322	7.01354	6.70658	6.27559	6.02598	6.12954	6.10725	7.383	10.3848	7.98632	8.08572	8.75439	7.9729	7.03395	12.7978	11.3302	13.4228	13.9822	13.5787
3887.14	7.69425	6.99453	6.6808	6.27274	6.03746	6.13354	6.09074	7.35283	10.3672	7.97971	8.07855	8.7296	7.94632	7.02657	12.7852	11.2995	13.3839	13.951	13.5586
3888.72	7.68664	6.97838	6.67587	6.26943	6.04048	6.11941	6.05691	7.33813	10.3229	7.97935	8.07041	8.70634	7.92708	7.01681	12.7614	11.2701	13.3891	13.9026	13.5383
3890.29	7.66813	6.95834	6.68722	6.2582	6.0247	6.0785	6.02481	7.335	10.2788	7.97532	8.0604	8.67621	7.91014	6.99764	12.7255	11.2427	13.4035	13.8419	13.5213
3891.86	7.62107	6.94703	6.69249	6.24751	6.00356	6.04851	6.01861	7.33034	10.2695	7.95865	8.04187	8.63234	7.89943	6.97181	12.6905	11.2245	13.3884	13.8133	13.4967
3893.43	7.58905	6.94894	6.67875	6.22686	5.98848	6.03599	6.0231	7.3128	10.2791	7.92815	8.00579	8.61174	7.89259	6.95608	12.6453	11.2065	13.3414	13.8154	13.4656
3895	7.58011	6.95333	6.65489	6.19054	5.96644	6.01994	6.02293	7.27753	10.276	7.90702	7.97748	8.60655	7.88451	6.94392	12.6046	11.1924	13.2965	13.8162	13.4193
3896.57	7.57375	6.94769	6.63806	6.16878	5.94861	6.01285	6.00834	7.25122	10.2335	7.88757	7.96515	8.60223	7.86827	6.93279	12.571	11.1825	13.2648	13.7825	13.3634
3898.14	7.56625	6.92714	6.62164	6.16349	5.93067	6.01655	5.98809	7.2318	10.1805	7.86564	7.95709	8.59597	7.84728	6.92447	12.5241	11.1643	13.2293	13.7135	13.3348
3899.71	7.54511	6.90322	6.60496	6.1597	5.90872	6.0213	5.97282	7.20976	10.1596	7.84647	7.9414	8.58727	7.82573	6.91486	12.4975	11.1421	13.2002	13.673	13.3268
3901.28	7.52308	6.87757	6.59234	6.15164	5.89557	6.01727	5.95344	7.19437	10.1583	7.80517	7.90773	8.57361	7.79114	6.9059	12.4973	11.1102	13.1683	13.6821	13.3185
3902.85	7.51233	6.84893	6.57421	6.13865	5.88685	6.00272	5.93447	7.17672	10.1549	7.7715	7.87957	8.54908	7.76025	6.89719	12.4981	11.0742	13.1319	13.6958	13.2804
3904.42	7.50686	6.83094	6.55648	6.12803	5.87826	5.98905	5.9165	7.15984	10.1194	7.77186	7.86898	8.52228	7.73421	6.88864	12.4792	11.0395	13.1006	13.6708	13.2011
3905.98	7.50292	6.8122	6.53236	6.11194	5.86176	5.97494	5.89588	7.14908	10.0594	7.78328	7.85898	8.49704	7.70081	6.8727	12.4338	10.9877	13.062	13.6021	13.1508
3907.55	7.49525	6.79159	6.50159	6.08805	5.83436	5.95641	5.87986	7.13972	10.0259	7.77706	7.84299	8.44899	7.67673	6.83309	12.3932	10.9458	13.0308	13.5402	13.1524
3909.12	7.48295	6.77291	6.48611	6.07469	5.8151	5.93212	5.86753	7.1328	10.0041	7.74885	7.81947	8.40907	7.65299	6.80026	12.3698	10.9271	13.0101	13.5043	13.1621
3910.69	7.46205	6.751	6.48408	6.07334	5.80412	5.89403	5.85624	7.13841	9.9824	7.71739	7.79581	8.3941	7.62997	6.78694	12.3486	10.9131	12.9891	13.4725	13.1404
3912.25	7.42086	6.73687	6.48141	6.07054	5.79526	5.86211	5.84471	7.1473	9.96318	7.696	7.77553	8.38133	7.61449	6.77172	12.3299	10.9033	12.9752	13.4457	13.0834
3913.82	7.38978	6.73269	6.4744	6.05118	5.78981	5.86125	5.83206	7.13625	9.94193	7.67693	7.75026	8.37304	7.6018	6.75817	12.3094	10.8991	12.9583	13.4173	13.0334
3915.38	7.38439	6.72946	6.46504	6.01811	5.78825	5.87789	5.81987	7.09809	9.92401	7.66373	7.73052	8.37474	7.59178	6.74515	12.2906	10.8925	12.937	13.3903	13.0016
3916.95	7.38362	6.72394	6.45088	5.99405	5.78407	5.87721	5.80467	7.06608	9.91034	7.65526	7.71721	8.3766	7.58402	6.73358	12.2747	10.8609	12.8987	13.3712	12.9705
3918.51	7.37496	6.71741	6.41917	5.98208	5.77338	5.84147	5.78788	7.05175	9.89518	7.64794	7.70429	8.36041	7.5783	6.72163	12.2556	10.7984	12.8272	13.3572	12.938
3920.07	7.35073	6.71001	6.38254	5.97185	5.76033	5.79735	5.77642	7.03979	9.87144	7.64279	7.69111	8.32696	7.57618	6.70474	12.2303	10.7537	12.779	13.3336	12.8952
3921.64	7.3262	6.69781	6.36446	5.96512	5.74948	5.78706	5.7693	7.02848	9.82465	7.64304	7.67474	8.29865	7.58082	6.69358	12.1809	10.735	12.7697	13.2808	12.8575
3923.2	7.31235	6.67903	6.35592	5.9649	5.73135	5.80843	5.76338	7.00681	9.78489	7.64063	7.65683	8.2711	7.58199	6.69181	12.1219	10.7207	12.7686	13.2188	12.8446
3924.76	7.29682	6.65869	6.34802	5.96355	5.71001	5.82221	5.75612	6.98443	9.7673	7.61573	7.62421	8.23967	7.55776	6.69205	12.0926	10.7138	12.7568	13.1848	12.8432
3926.32	7.28517	6.62468	6.3402	5.95842	5.69264	5.81435	5.74822	6.96917	9.74926	7.56972	7.57399	8.23326	7.50985	6.6849	12.0767	10.7067	12.7217	13.161	12.8338
3927.89	7.27395	6.59026	6.33195	5.95371	5.67588	5.7997	5.74262	6.94918	9.73997	7.54488	7.55231	8.24969	7.48169	6.66225	12.0579	10.6974	12.6869	13.1378	12.7927
3929.45	7.26104	6.57947	6.32338	5.94315	5.66489	5.78083	5.74251	6.93664	9.73616	7.53387	7.56543	8.25798	7.47401	6.63955	12.0271	10.6705	12.638	13.1119	12.739
3931.01	7.24933	6.58178	6.31091	5.91823	5.64845	5.74369	5.74177	6.93951	9.73018	7.52515	7.58172	8.22951	7.4691	6.62144	11.9876	10.6236	12.5596	13.084	12.7192
3932.57	7.22578	6.58016	6.30004	5.89443	5.62861	5.70722	5.72625	6.94508	9.71083	7.51658	7.5722	8.17509	7.4549	6.60092	11.9555	10.5874	12.5135	13.059	12.7207
3934.13	7.20274	6.55873	6.28209	5.88113	5.62019	5.69318	5.6856	6.93527	9.6635	7.49291	7.53582	8.13501	7.42291	6.5898	11.9201	10.5495	12.4949	13.0156	12.7161
3935.69	7.18676	6.5282	6.24907	5.86708	5.6143	5.68704	5.65504	6.90181	9.62663	7.47306	7.50817	8.10267	7.3971	6.57847	11.8885	10.517	12.4808	12.9744	12.6778
3937.25	7.1684	6.51399	6.22736	5.85473	5.60942	5.68211	5.63847	6.86924	9.60031	7.45608	7.49264	8.07556	7.38212	6.56729	11.8762	10.5101	12.4839	12.9645	12.6115
3938.81	7.15209	6.50512	6.22053	5.84076	5.60212	5.68402	5.62107	6.84636	9.56926	7.43449	7.47435	8.07014	7.3663	6.5629	11.8685	10.5095	12.5073	12.9636	12.5687
3940.36	7.12259	6.49595	6.21473	5.82733	5.58972	5.69019	5.61385	6.82336	9.55444	7.41933	7.46343	8.07317	7.35071	6.55416	11.8537	10.5015	12.5132	12.9569	12.5384
3941.92	7.09301	6.48666	6.20746	5.81422	5.58006	5.68128	5.6114	6.8093	9.55524	7.39699	7.45515	8.07279	7.32328	6.54583	11.8133	10.4651	12.4621	12.9181	12.5104
3943.48	7.08504	6.47381	6.19697	5.78817	5.56248	5.65133	5.61005	6.80457	9.55439	7.37657	7.44651	8.04652	7.29904	6.52452	11.7631	10.4161	12.3884	12.8597	12.4997
3945.04	7.08607	6.46181	6.18813	5.76717	5.54401	5.62521	5.59569	6.8041	9.53163	7.36627	7.42386	8.00531	7.28579	6.49118	11.7316	10.3917	12.3551	12.8241	12.4931
3946.59	7.08077	6.43882	6.17075	5.76028	5.53281	5.6077	5.56003	6.79186	9.4893	7.3566	7.38228	7.98986	7.26996	6.47856	11.6986	10.3758	12.342	12.7971	12.4815
3948.15	7.04764	6.41189	6.14348	5.7559	5.51635	5.58996	5.5404	6.75318	9.45829	7.3489	7.36467	7.98586	7.26301	6.47811	11.678	10.3626	12.3322	12.7716	12.4472
3949.7	7.0027	6.39564	6.12552	5.74953	5.50529	5.57886	5.54288	6.72793	9.4348	7.32872	7.36555	7.98003	7.25815	6.47293	11.6843	10.3433	12.3045	12.7352	12.4049
3951.26	6.98565	6.36931	6.10741	5.72729	5.50173	5.56457	5.54869	6.72179	9.41403	7.30576	7.3681	7.9658	7.25254	6.45085	11.6968	10.3107	12.2545	12.6883	12.3656
3952.81	6.99335	6.35265	6.09012	5.70378	5.4997	5.55119	5.54644	6.71809	9.39886	7.2927	7.36559	7.94126	7.24285	6.41477	11.6878	10.286	12.2337	12.6672	12.2999
3954.37	7.00311	6.3538	6.07851	5.69583	5.49437	5.54436	5.5402	6.71156	9.37608	7.26639	7.34294	7.9175	7.20909	6.38628	11.6433	10.2607	12.2329	12.6517	12.2541
3955.92	6.99784	6.3547	6.06243	5.69125	5.46953	5.53413	5.53395	6.68883	9.35727	7.24654	7.32017	7.88382	7.18608	6.36148	11.5972	10.235	12.2228	12.6293	12.2531
3957.47	6.98231	6.34957	6.0521	5.68643	5.44612	5.52589	5.51508	6.66795	9.32697	7.23881	7.3	7.85447	7.17307	6.33943	11.5717	10.2106	12.1896	12.5987	12.2579
3959.03	6.96917	6.32901	6.0462	5.67914	5.4357	5.51096	5.48669	6.65025	9.2867	7.22822	7.27775	7.85177	7.1531	6.32539	11.5508	10.1749	12.1301	12.5481	12.2471
3960.58	6.93527	6.31056	6.04021	5.6721	5.42559	5.4904	5.47507	6.6242	9.27538	7.20939	7.26588	7.85767	7.14378	6.307	11.5309	10.1447	12.0797	12.5184	12.2038
3962.13	6.89557	6.30762	6.03041	5.6683	5.41726	5.48219	5.4704	6.60832	9.27056	7.17243	7.25269	7.85651	7.12946	6.28899	11.485	10.1104	12.0382	12.5031	12.1548
3963.68	6.87642	6.30652	6.00651	5.65949	5.40457	5.48092	5.46552	6.59039	9.26261	7.13769	7.24064	7.82767	7.11384	6.27413	11.4308	10.0756	11.9995	12.4859	12.1262
3965.23	6.84947	6.30024	5.98778	5.64984	5.39162	5.4805	5.45311	6.57083	9.24623	7.11319	7.22437	7.78866	7.09481	6.26462	11.4065	10.0662	11.9775	12.4698	12.1057
3966.79	6.83148	6.27464	5.97832	5.63887	5.38107	5.47074	5.42888	6.55103	9.21835	7.08502	7.19383	7.76876	7.06291	6.25927	11.3746	10.0643	11.958	12.427	12.0838
3968.34	6.82765	6.24465	5.9657	5.62247	5.36332	5.45137	5.40718	6.51748	9.19635	7.07485	7.17531	7.74044	7.0432	6.24767	11.3477	10.0599	11.9423	12.3864	12.026
3969.89	6.82612	6.23202	5.95283	5.60882	5.35115	5.43644	5.37367	6.49356	9.16525	7.08075	7.15828	7.71914	7.02805	6.23737	11.3178	10.0355	11.9076	12.3536	11.9594
3971.43	6.82537	6.21359	5.93178	5.59589	5.33995	5.41271	5.34197	6.48436	9.12905	7.08673	7.13656	7.71369	7.01341	6.22029	11.2691	9.99057	11.8527	12.3097	11.9322
3972.98	6.81115	6.19541	5.91139	5.58428	5.32812	5.3894	5.3384	6.47998	9.10009	7.08012	7.10835	7.70405	6.99885	6.18828	11.2358	9.9593	11.8241	12.2741	11.9117
3974.53	6.79055	6.18065	5.90092	5.56098	5.32059	5.38129	5.3512	6.47645	9.06433	7.05641	7.05861	7.69104	6.96654	6.16826	11.1963	9.93351	11.7963	12.2411	11.8991
3976.08	6.76307	6.16552	5.89143	5.51949	5.29498	5.3755	5.36029	6.46861	9.03826	7.03095	7.03016	7.66067	6.945	6.15164	11.1594	9.91084	11.7777	12.21	11.8732
3977.63	6.72234	6.15686	5.88277	5.492	5.27564	5.37001	5.34267	6.46069	9.02638	7.00377	7.02675	7.62909	6.94086	6.13758	11.1462	9.89057	11.7757	12.1759	11.827
3979.18	6.69844	6.14499	5.86421	5.47871	5.26624	5.34919	5.30904	6.45591	9.01608	6.97532	7.02388	7.61414	6.93663	6.1262	11.1393	9.86313	11.7581	12.1341	11.8121
3980.72	6.68037	6.13458	5.83963	5.46793	5.24994	5.31923	5.28669	6.45005	8.99959	6.95731	7.0234	7.60148	6.92697	6.10174	11.138	9.85107	11.751	12.1152	11.8152
3982.27	6.66541	6.12735	5.82761	5.45857	5.24111	5.30729	5.26883	6.43921	8.96707	6.93179	7.01182	7.58593	6.90449	6.09187	11.1294	9.84179	11.7331	12.1068	11.816
3983.81	6.65919	6.11149	5.82308	5.44061	5.23088	5.30588	5.2566	6.42064	8.93841	6.91632	6.99682	7.55134	6.88753	6.1035	11.1119	9.82645	11.7025	12.0931	11.7839
3985.36	6.63726	6.09386	5.82096	5.42644	5.22443	5.3024	5.25178	6.40275	8.91846	6.91797	6.98087	7.50912	6.88145	6.11764	11.0799	9.79812	11.6667	12.0647	11.7172
3986.91	6.61841	6.05583	5.81211	5.41967	5.22866	5.29243	5.249	6.38666	8.89094	6.91576	6.95921	7.48727	6.87097	6.11123	11.0208	9.73695	11.5943	12.0013	11.6805
3988.45	6.60645	6.01475	5.79576	5.4123	5.22922	5.28011	5.24722	6.36181	8.86889	6.9095	6.94277	7.47435	6.86293	6.0728	10.9782	9.69747	11.5438	11.9539	11.6673
3989.99	6.59197	6.00858	5.78351	5.40284	5.22308	5.27383	5.24062	6.34357	8.8433	6.8733	6.91793	7.47076	6.83813	6.04022	10.9548	9.6886	11.5373	11.934	11.6515
3991.54	6.57921	6.01406	5.76567	5.38297	5.19708	5.26458	5.2308	6.32352	8.8186	6.83296	6.89284	7.47172	6.80649	6.02782	10.9334	9.68142	11.5394	11.9143	11.608
3993.08	6.56494	6.01861	5.7454	5.36302	5.16209	5.25394	5.21914	6.30217	8.80241	6.82033	6.87583	7.47124	6.78116	6.01987	10.9223	9.67576	11.5057	11.8943	11.5323
3994.62	6.55402	6.00643	5.7318	5.35467	5.13798	5.23436	5.20169	6.29153	8.78635	6.81618	6.85139	7.46869	6.75074	6.00778	10.897	9.65543	11.4071	11.8674	11.4969
3996.17	6.54403	5.98245	5.72011	5.35179	5.11613	5.19976	5.18418	6.28152	8.77501	6.81359	6.83909	7.44394	6.73452	5.97659	10.8709	9.641	11.3393	11.8532	11.5217
3997.71	6.52735	5.97153	5.711	5.35016	5.10569	5.17713	5.15324	6.27339	8.75519	6.80067	6.825	7.41791	6.73215	5.94945	10.8355	9.63606	11.361	11.8581	11.5605
3999.25	6.51713	5.94933	5.69975	5.34148	5.10901	5.16536	5.12077	6.24298	8.7284	6.78431	6.8054	7.3999	6.73304	5.94479	10.7792	9.6234	11.4128	11.8649	11.5605
4000.79	6.5035	5.92543	5.69043	5.32707	5.11515	5.1558	5.11871	6.19808	8.71114	6.77683	6.79855	7.37184	6.73173	5.94601	10.7549	9.60865	11.4311	11.8512	11.5057
4002.33	6.48941	5.90881	5.67902	5.30882	5.11646	5.14662	5.14082	6.18763	8.69846	6.76239	6.79038	7.35046	6.71244	5.93768	10.7569	9.57372	11.3899	11.7877	11.4609
4003.87	6.47864	5.88554	5.65416	5.28305	5.10061	5.1316	5.15562	6.20425	8.69037	6.74841	6.78284	7.32532	6.69761	5.90998	10.759	9.53468	11.3458	11.7256	11.4216
4005.41	6.45433	5.87517	5.63717	5.26368	5.08284	5.1253	5.13496	6.22022	8.67925	6.73145	6.76999	7.29853	6.68581	5.88268	10.7552	9.50551	11.3175	11.7179	11.3694
4006.95	6.43971	5.87113	5.63045	5.25694	5.07132	5.1314	5.09644	6.21138	8.66246	6.70729	6.74889	7.28454	6.6635	5.86831	10.7398	9.46915	11.2738	11.7307	11.3433
4008.49	6.42642	5.86632	5.62398	5.25608	5.05671	5.13916	5.07769	6.18355	8.65076	6.69433	6.73595	7.27039	6.65075	5.85316	10.7199	9.44732	11.2467	11.7298	11.323
4010.03	6.40651	5.86066	5.61838	5.25435	5.04994	5.13746	5.06427	6.16593	8.61829	6.68647	6.72477	7.25519	6.62616	5.84607	10.6772	9.43371	11.2403	11.6854	11.3044
4011.57	6.39448	5.84442	5.60218	5.24501	5.04021	5.11758	5.05346	6.14998	8.58694	6.67898	6.7151	7.22769	6.60081	5.8468	10.6269	9.41935	11.2338	11.6239	11.2895
4013.11	6.37791	5.83273	5.58578	5.23455	5.02882	5.09566	5.04697	6.13507	8.5752	6.66367	6.70094	7.19456	6.58792	5.84527	10.5989	9.41022	11.2131	11.5846	11.2642
4014.64	6.36535	5.82193	5.56297	5.22239	5.01865	5.07631	5.03742	6.12732	8.56294	6.63611	6.67378	7.17886	6.57798	5.83743	10.5731	9.39415	11.1703	11.5499	11.2349
4016.18	6.36274	5.80572	5.52923	5.20597	4.9965	5.05505	5.02936	6.11596	8.5518	6.61957	6.65806	7.1702	6.57252	5.82105	10.5537	9.37883	11.1418	11.5235	11.1839
4017.72	6.36033	5.79615	5.51628	5.1938	4.9805	5.04444	5.00727	6.10671	8.52778	6.60388	6.6525	7.16398	6.55448	5.80884	10.5412	9.3543	11.1442	11.5108	11.1376
4019.25	6.35086	5.78176	5.523	5.18067	4.97019	5.04222	4.98435	6.09544	8.50124	6.58984	6.64745	7.15745	6.53193	5.79644	10.5265	9.32083	11.1546	11.501	11.1267
4020.79	6.30902	5.77096	5.52746	5.16766	4.96131	5.03901	4.98454	6.0809	8.48235	6.58642	6.63695	7.14773	6.51872	5.7767	10.4975	9.30392	11.131	11.4807	11.1236
4022.33	6.26794	5.76635	5.52024	5.16029	4.95953	5.03059	4.99806	6.06975	8.45097	6.57951	6.61385	7.13926	6.5014	5.76203	10.4391	9.29276	11.0552	11.4409	11.1184
4023.86	6.25857	5.75897	5.50567	5.15385	4.95898	5.01835	5.00351	6.06092	8.4278	6.57234	6.59189	7.12743	6.48344	5.74684	10.3965	9.28315	10.9867	11.4081	11.0794
4025.39	6.25485	5.75059	5.49705	5.14672	4.95902	5.01099	4.98705	6.04935	8.409	6.54614	6.56051	7.11727	6.45287	5.7349	10.4005	9.25052	10.9564	11.3786	11.0215
4026.93	6.25323	5.72513	5.49453	5.1327	4.95193	5.00388	4.96392	6.02618	8.39119	6.51082	6.52624	7.10153	6.42152	5.72964	10.4211	9.19224	10.9401	11.3386	10.9969
4028.46	6.24191	5.69945	5.49261	5.1173	4.93691	4.99516	4.9504	5.9981	8.38392	6.50081	6.51886	7.0734	6.42129	5.72284	10.4224	9.16654	10.9293	11.3145	10.9927
4030	6.22797	5.6904	5.48022	5.10698	4.92413	4.98471	4.93478	5.98324	8.35932	6.49753	6.5245	7.05498	6.44033	5.71225	10.3886	9.16511	10.9108	11.2982	10.9886
4031.53	6.22379	5.68077	5.45165	5.09398	4.88402	4.967	4.9212	5.96949	8.33754	6.49328	6.52721	7.03629	6.45296	5.68826	10.3496	9.15818	10.8891	11.2799	10.9646
4033.06	6.21615	5.66756	5.43118	5.08584	4.84847	4.95438	4.90519	5.95584	8.32278	6.48166	6.51309	7.01629	6.4396	5.65834	10.3129	9.14248	10.8504	11.2574	10.9301
4034.59	6.20885	5.64505	5.4144	5.07618	4.84928	4.94635	4.88308	5.93505	8.29929	6.46349	6.48815	7.00216	6.41247	5.63377	10.269	9.11812	10.7888	11.2291	10.9142
4036.12	6.18469	5.62363	5.39326	5.06149	4.85995	4.93714	4.87147	5.90154	8.27533	6.44591	6.47026	6.98043	6.39397	5.611	10.2453	9.09527	10.7608	11.2152	10.8918
4037.66	6.14921	5.61289	5.38203	5.05441	4.86197	4.9246	4.86125	5.88527	8.23622	6.40831	6.44667	6.96495	6.36908	5.59969	10.2266	9.07136	10.7796	11.2033	10.8714
4039.19	6.1389	5.59791	5.37078	5.04659	4.84701	4.89454	4.85391	5.89224	8.20605	6.377	6.42946	6.95958	6.34938	5.60162	10.2037	9.04854	10.8024	11.1883	10.8478
4040.72	6.13661	5.58669	5.35801	5.03843	4.82773	4.86653	4.85267	5.90233	8.20193	6.36893	6.42425	6.95412	6.34541	5.60631	10.1883	9.03065	10.7951	11.1625	10.8113
4042.25	6.13194	5.57856	5.3382	5.02702	4.81664	4.84747	4.85101	5.89373	8.20089	6.35913	6.41231	6.93615	6.34053	5.60552	10.1677	9.01225	10.7632	11.1075	10.7901
4043.78	6.11427	5.56725	5.3113	5.00923	4.80859	4.82777	4.84651	5.86441	8.19579	6.35231	6.40155	6.90186	6.33176	5.59789	10.1486	8.99846	10.7373	11.055	10.7575
4045.3	6.08274	5.55771	5.29975	4.9968	4.80358	4.82572	4.83299	5.83993	8.18277	6.34323	6.38446	6.87427	6.31583	5.58929	10.126	8.97287	10.6996	10.9967	10.7205
4046.83	6.0595	5.5446	5.29637	4.9831	4.79213	4.8485	4.81804	5.81928	8.16706	6.33245	6.36692	6.85849	6.29764	5.5685	10.1008	8.93837	10.6513	10.9371	10.6947
4048.36	6.0346	5.53282	5.29112	4.97013	4.77773	4.87282	4.80989	5.80088	8.14276	6.32087	6.35293	6.84442	6.27091	5.53655	10.0786	8.91206	10.6302	10.9195	10.6666
4049.89	6.01275	5.52258	5.28086	4.96807	4.76918	4.86076	4.80318	5.79601	8.09839	6.30348	6.32934	6.83471	6.22319	5.51131	10.0447	8.87957	10.6235	10.9263	10.649
4051.42	6.00524	5.51046	5.26387	4.9705	4.75311	4.81741	4.79683	5.79856	8.07617	6.29	6.31655	6.82739	6.19978	5.4854	10.0122	8.85545	10.6146	10.932	10.6376
4052.94	6.00369	5.50093	5.252	4.96588	4.74176	4.79262	4.78415	5.79783	8.08064	6.27754	6.31376	6.82096	6.19981	5.46768	9.97871	8.85097	10.5831	10.9266	10.6231
4054.47	5.99923	5.47798	5.23753	4.93424	4.73807	4.79086	4.76742	5.78712	8.08171	6.26344	6.3086	6.80876	6.19728	5.46843	9.9415	8.85095	10.5344	10.9126	10.5982
4056	5.98572	5.45549	5.22116	4.89604	4.73299	4.79134	4.74761	5.77245	8.06126	6.24988	6.29832	6.79103	6.18962	5.47496	9.92004	8.83211	10.4975	10.883	10.5586
4057.52	5.9708	5.44645	5.2138	4.88496	4.72432	4.7823	4.70896	5.76127	8.01585	6.22807	6.27945	6.77023	6.17467	5.46992	9.9	8.78023	10.4601	10.8165	10.5265
4059.05	5.95911	5.43514	5.20901	4.88785	4.70248	4.76105	4.68299	5.74351	7.98374	6.20744	6.26253	6.73044	6.16002	5.44461	9.87775	8.73861	10.4274	10.758	10.5114
4060.57	5.9375	5.42691	5.20349	4.88721	4.68072	4.74561	4.68514	5.72641	7.97447	6.18263	6.24563	6.69258	6.13419	5.41954	9.85258	8.7383	10.4112	10.746	10.501
4062.09	5.92521	5.4122	5.193	4.87778	4.66584	4.73184	4.69291	5.71208	7.96503	6.1529	6.22555	6.67243	6.09904	5.40817	9.82164	8.75218	10.3991	10.7509	10.4685
4063.62	5.92741	5.3932	5.17847	4.86448	4.65035	4.715	4.6882	5.69499	7.94646	6.13876	6.2097	6.65197	6.08624	5.40071	9.79285	8.74454	10.3806	10.7408	10.3958
4065.14	5.9279	5.37458	5.16329	4.852	4.6392	4.69806	4.66794	5.68435	7.90082	6.13265	6.18387	6.63867	6.08806	5.39039	9.74958	8.70532	10.3458	10.7085	10.34
4066.67	5.91573	5.34067	5.14263	4.83348	4.62495	4.67149	4.64863	5.67646	7.8634	6.12674	6.16351	6.63488	6.08645	5.36976	9.70811	8.66443	10.3108	10.6735	10.3191
4068.19	5.8864	5.31853	5.12592	4.81934	4.61149	4.65023	4.63602	5.6671	7.85071	6.11082	6.1556	6.63198	6.06587	5.348	9.6975	8.63793	10.2821	10.6447	10.3082
4069.71	5.86171	5.32287	5.11542	4.80418	4.60262	4.64751	4.62278	5.64572	7.83903	6.08604	6.14646	6.6222	6.03397	5.33309	9.70241	8.61658	10.2512	10.6162	10.2997
4071.23	5.84238	5.33316	5.10577	4.78239	4.59112	4.65206	4.61334	5.60828	7.82812	6.07376	6.1375	6.60644	6.01778	5.31765	9.69378	8.59865	10.2301	10.5858	10.2924
4072.75	5.81528	5.32779	5.09802	4.76713	4.57914	4.65137	4.60564	5.58762	7.8155	6.06992	6.12717	6.59019	6.01349	5.30504	9.64967	8.57131	10.2191	10.5446	10.2852
4074.27	5.80018	5.30746	5.0867	4.75128	4.56559	4.6427	4.59887	5.59169	7.80088	6.06228	6.11896	6.56117	6.00727	5.29797	9.60272	8.54294	10.2115	10.5058	10.2646
4075.79	5.78944	5.29168	5.07304	4.73684	4.55232	4.63234	4.59152	5.59893	7.77619	6.03741	6.10794	6.52778	5.99241	5.29208	9.57994	8.51921	10.194	10.4875	10.2309
4077.31	5.78028	5.28459	5.06569	4.73483	4.54179	4.61395	4.58257	5.58798	7.73917	5.99702	6.08634	6.51627	5.97214	5.28699	9.56341	8.48806	10.1619	10.4794	10.2003
4078.83	5.77062	5.2756	5.06317	4.73875	4.53098	4.58765	4.57588	5.55815	7.71519	5.97345	6.06809	6.51826	5.95407	5.28484	9.55562	8.46395	10.1399	10.4684	10.1532
4080.35	5.75569	5.26682	5.05403	4.73504	4.52133	4.57269	4.56428	5.53224	7.69635	5.96268	6.03902	6.51515	5.93816	5.28112	9.55626	8.44254	10.1219	10.4376	10.1089
4081.87	5.74447	5.25243	5.02817	4.71942	4.50436	4.57091	4.55131	5.50356	7.67783	5.95319	6.01032	6.48736	5.92506	5.26386	9.55805	8.42322	10.1015	10.3991	10.0756
4083.39	5.72361	5.23869	5.00335	4.70203	4.48476	4.5716	4.53704	5.47681	7.66336	5.94388	5.99873	6.44979	5.90774	5.23953	9.54458	8.41445	10.0722	10.3666	10.0401
4084.91	5.70007	5.22863	4.99217	4.68603	4.47487	4.56808	4.51107	5.47626	7.64806	5.93238	5.98814	6.42479	5.87498	5.22064	9.5033	8.40582	10.0196	10.329	10.0235
4086.43	5.68751	5.21631	4.98472	4.66892	4.46788	4.56081	4.49387	5.49583	7.63308	5.92125	5.97689	6.3971	5.85694	5.20064	9.46225	8.3997	9.97464	10.3028	10.017
4087.94	5.67761	5.19913	4.98016	4.65829	4.46329	4.55414	4.47528	5.50866	7.59161	5.89961	5.95482	6.37811	5.8545	5.18631	9.42732	8.39354	9.94092	10.2912	10.0123
4089.46	5.67024	5.16263	4.97649	4.6498	4.45352	4.53098	4.45544	5.48093	7.54353	5.87498	5.93102	6.37508	5.85122	5.17884	9.39549	8.38124	9.91253	10.2807	9.99429
4090.98	5.65726	5.13049	4.9729	4.6412	4.43907	4.50341	4.45389	5.43457	7.53207	5.86108	5.92143	6.37417	5.84204	5.17175	9.37764	8.35792	9.89875	10.266	9.95262
4092.49	5.64148	5.12261	4.95351	4.62582	4.43053	4.48791	4.46097	5.41671	7.53662	5.84436	5.9172	6.37272	5.82443	5.16648	9.36516	8.31815	9.88385	10.2416	9.92306
4094.01	5.62919	5.1173	4.90963	4.59722	4.42026	4.47066	4.46251	5.40317	7.53701	5.83355	5.91275	6.3663	5.80894	5.15732	9.35148	8.28276	9.86943	10.2217	9.9
4095.52	5.6082	5.11135	4.87953	4.5789	4.41101	4.45981	4.44684	5.39279	7.52072	5.82782	5.89287	6.36005	5.78944	5.15222	9.33226	8.24319	9.83824	10.1707	9.87931
4097.04	5.59057	5.09075	4.87463	4.57705	4.40208	4.46425	4.42723	5.37823	7.50059	5.82051	5.86343	6.33413	5.76469	5.12896	9.3097	8.19877	9.79393	10.0975	9.86166
4098.55	5.57469	5.06768	4.8767	4.57873	4.39004	4.47274	4.41863	5.35466	7.48371	5.80799	5.84156	6.28851	5.74351	5.08502	9.27958	8.18635	9.77042	10.0765	9.83326
4100.07	5.5561	5.06355	4.87202	4.5693	4.37825	4.4636	4.40498	5.34267	7.44689	5.77984	5.81028	6.26361	5.71028	5.07414	9.22378	8.20393	9.75102	10.0949	9.81614
4101.58	5.54106	5.06543	4.85552	4.543	4.3516	4.42996	4.397	5.32697	7.418	5.75977	5.79301	6.25058	5.69104	5.09433	9.18168	8.2183	9.73319	10.1089	9.80267
4103.09	5.51814	5.06035	4.84345	4.52535	4.32713	4.40335	4.39869	5.3136	7.40081	5.75274	5.79999	6.23722	5.69753	5.11108	9.17921	8.19851	9.70383	10.0813	9.78405
4104.61	5.50161	5.04366	4.8269	4.52317	4.31965	4.38776	4.399	5.31066	7.38156	5.74402	5.80953	6.21758	5.70745	5.09508	9.18935	8.15887	9.66194	10.0258	9.76145
4106.12	5.50046	5.02573	4.8031	4.52375	4.31752	4.3739	4.39046	5.30819	7.37587	5.73783	5.80213	6.18832	5.70577	5.05333	9.1848	8.14048	9.64363	9.99834	9.72625
4107.63	5.50307	5.01209	4.78469	4.52023	4.31614	4.36848	4.36395	5.29966	7.36932	5.73067	5.76495	6.17331	5.68985	5.02556	9.15227	8.13444	9.63876	9.98417	9.69533
4109.14	5.50065	4.99487	4.76047	4.50826	4.3113	4.36584	4.34072	5.26958	7.36068	5.72388	5.73498	6.17411	5.67425	4.99799	9.11735	8.12616	9.63443	9.9696	9.66496
4110.65	5.48446	4.98154	4.74403	4.49609	4.30485	4.36445	4.32495	5.24148	7.33627	5.70886	5.72142	6.17613	5.6576	4.96985	9.08456	8.0923	9.62035	9.92878	9.63333
4112.16	5.46882	4.97274	4.75171	4.485	4.29238	4.35862	4.30461	5.23805	7.29576	5.68402	5.70264	6.16319	5.63389	4.95448	9.04821	8.03603	9.59432	9.86147	9.61011
4113.67	5.45774	4.96367	4.7687	4.47291	4.26847	4.34675	4.29215	5.24232	7.27908	5.6676	5.69433	6.1356	5.61512	4.941	9.03182	8.00139	9.57625	9.8263	9.58564
4115.18	5.43999	4.95578	4.77286	4.46463	4.25379	4.33556	4.27764	5.24327	7.27174	5.64413	5.68774	6.11647	5.58367	4.93371	9.03456	7.97738	9.56059	9.81764	9.56589
4116.69	5.42717	4.94072	4.75606	4.45521	4.24258	4.3178	4.26363	5.23036	7.26256	5.62347	5.68174	6.10997	5.55885	4.93319	9.03607	7.95751	9.54564	9.8074	9.55143
4118.2	5.40548	4.92971	4.73669	4.4448	4.23249	4.30178	4.25272	5.21353	7.25408	5.61362	5.68299	6.10534	5.56022	4.93403	9.02792	7.95312	9.51684	9.78365	9.53785
4119.71	5.38482	4.92815	4.715	4.41817	4.22928	4.29502	4.24109	5.20344	7.24584	5.6016	5.68836	6.1035	5.57003	4.93344	9.01456	7.95567	9.47046	9.75228	9.52225
4121.22	5.37515	4.92703	4.68845	4.37702	4.2288	4.29092	4.23744	5.19347	7.22948	5.59025	5.6872	6.10598	5.56846	4.9293	8.99788	7.95398	9.43866	9.73605	9.48944
4122.72	5.36281	4.91755	4.67733	4.35676	4.22485	4.287	4.24221	5.18411	7.19771	5.5775	5.68791	6.09989	5.55043	4.91831	8.95465	7.93824	9.4063	9.7211	9.45988
4124.23	5.35325	4.88451	4.67786	4.35853	4.21175	4.28016	4.24492	5.17203	7.1685	5.56691	5.6851	6.06062	5.53162	4.8921	8.91148	7.91984	9.37447	9.70255	9.43328
4125.74	5.33246	4.85542	4.67789	4.36062	4.1984	4.27351	4.23191	5.15904	7.14851	5.55415	5.65597	6.01353	5.51513	4.86359	8.88586	7.88423	9.35186	9.68814	9.39995
4127.24	5.30866	4.84612	4.66619	4.35711	4.19068	4.2603	4.20415	5.14045	7.12416	5.5333	5.60104	5.99661	5.49182	4.84262	8.85614	7.82364	9.32453	9.67255	9.36699
4128.75	5.29302	4.8375	4.64319	4.352	4.1751	4.23785	4.18368	5.0988	7.10337	5.51716	5.56097	5.99568	5.47189	4.82091	8.83009	7.78637	9.29495	9.65136	9.30786
4130.26	5.27102	4.83413	4.62714	4.34214	4.16501	4.22104	4.16792	5.07018	7.07189	5.48847	5.53297	5.99167	5.44845	4.80814	8.79123	7.76947	9.25545	9.6075	9.26155
4131.76	5.255	4.83642	4.61726	4.31018	4.14905	4.19871	4.15239	5.05801	7.04127	5.45869	5.51174	5.96756	5.42301	4.81333	8.75256	7.75551	9.21951	9.56066	9.26403
4133.27	5.24821	4.83501	4.60932	4.27763	4.12738	4.17637	4.13897	5.04768	7.03037	5.45166	5.50149	5.93604	5.40272	4.823	8.73681	7.7478	9.21835	9.53959	9.28353
4134.77	5.24423	4.8146	4.60291	4.27456	4.11583	4.16982	4.12401	5.04004	7.02693	5.4549	5.49022	5.91578	5.38506	4.81703	8.72668	7.74204	9.24076	9.53057	9.27792
4136.27	5.23379	4.77645	4.59439	4.28644	4.10175	4.17004	4.11303	5.03183	7.02366	5.45431	5.48092	5.89563	5.3763	4.79516	8.71603	7.7325	9.24543	9.51568	9.22642
4137.78	5.20724	4.7539	4.58306	4.28751	4.09193	4.16691	4.10584	5.02644	7.01877	5.44697	5.47271	5.87913	5.37952	4.7753	8.6714	7.69934	9.20703	9.47545	9.17782
4139.28	5.18954	4.75346	4.55858	4.27724	4.0838	4.15125	4.09968	5.02097	7.00966	5.4377	5.46361	5.87499	5.38199	4.75155	8.61723	7.66105	9.16195	9.42687	9.15751
4140.78	5.18646	4.75529	4.53211	4.26806	4.07446	4.13329	4.0919	5.01256	6.98367	5.41808	5.44998	5.8756	5.36627	4.72625	8.60471	7.64164	9.1375	9.38716	9.1389
4142.29	5.18304	4.75164	4.51774	4.2583	4.06801	4.12517	4.0798	4.99872	6.93804	5.38257	5.4305	5.86811	5.33532	4.71476	8.61366	7.62537	9.11043	9.34552	9.12269
4143.79	5.16754	4.74998	4.50698	4.24161	4.05313	4.11919	4.0711	4.96262	6.90458	5.36205	5.41735	5.85111	5.31365	4.7092	8.61371	7.60997	9.08902	9.32103	9.11345
4145.29	5.1316	4.74139	4.49948	4.22946	4.04022	4.11099	4.0686	4.93336	6.88679	5.35775	5.40679	5.83822	5.29756	4.70335	8.59443	7.5924	9.07695	9.31662	9.1066
4146.79	5.10538	4.71544	4.49066	4.20845	4.02323	4.093	4.06741	4.91938	6.87303	5.35225	5.39564	5.82757	5.28206	4.69026	8.57017	7.57401	9.06624	9.31509	9.09115
4148.29	5.09887	4.68612	4.47881	4.18318	4.00093	4.0719	4.05666	4.90584	6.86109	5.34148	5.38816	5.81441	5.27569	4.673	8.55263	7.55998	9.04453	9.28689	9.06404
4149.79	5.09634	4.66646	4.4635	4.17295	3.99442	4.05936	4.0311	4.89355	6.84436	5.32417	5.37757	5.79729	5.26853	4.66112	8.53176	7.54554	9.00221	9.22381	9.03639
4151.29	5.0913	4.64549	4.4423	4.16719	3.99326	4.04974	4.01451	4.87122	6.82943	5.31079	5.36458	5.77047	5.25844	4.64875	8.51659	7.53352	8.96592	9.18376	8.98841
4152.79	5.07723	4.63405	4.4295	4.15955	3.99123	4.0423	4.00959	4.85591	6.80386	5.29809	5.34191	5.7464	5.23578	4.63607	8.49147	7.53023	8.92757	9.181	8.9464
4154.29	5.06547	4.62884	4.42021	4.1466	3.97957	4.03169	4.00494	4.86289	6.77305	5.28283	5.31691	5.7243	5.2093	4.62661	8.45814	7.52908	8.8896	9.18583	8.91916
4155.79	5.05754	4.6225	4.4101	4.13077	3.95988	4.01898	4.00052	4.87719	6.75703	5.26989	5.30455	5.70325	5.19721	4.61762	8.42594	7.49857	8.87802	9.16708	8.87804
4157.29	5.0458	4.61216	4.40623	4.11921	3.94767	4.01037	3.99421	4.8771	6.74147	5.25374	5.29503	5.69057	5.19027	4.60614	8.38059	7.42696	8.88388	9.11901	8.85415
4158.78	5.03158	4.58866	4.40376	4.11076	3.9409	4.00125	3.9861	4.86701	6.7262	5.23739	5.28405	5.677	5.18307	4.59254	8.34938	7.38056	8.88444	9.0859	8.83713
4160.28	5.00969	4.57333	4.39743	4.10546	3.93566	3.99205	3.96632	4.85082	6.70213	5.21977	5.2664	5.66672	5.17002	4.58201	8.34255	7.3823	8.86875	9.08148	8.8202
4161.78	4.99321	4.57013	4.38184	4.10774	3.92918	3.98059	3.94312	4.81723	6.67519	5.20329	5.24728	5.6576	5.15416	4.56508	8.34312	7.39714	8.84244	9.08435	8.80142
4163.27	4.98635	4.56511	4.36443	4.11242	3.92143	3.96757	3.9355	4.77387	6.6644	5.19389	5.23181	5.64577	5.14269	4.54374	8.32812	7.39013	8.79548	9.07082	8.7741
4164.77	4.97835	4.5529	4.35774	4.1055	3.91458	3.95419	3.93076	4.76092	6.65883	5.18537	5.21002	5.62847	5.13158	4.53473	8.28553	7.35712	8.71368	9.0325	8.74921
4166.27	4.9687	4.532	4.3547	4.08443	3.90427	3.93646	3.92343	4.77526	6.65249	5.17004	5.19254	5.59254	5.12168	4.53234	8.25637	7.33281	8.657	8.99934	8.69402
4167.76	4.95331	4.51816	4.34879	4.06656	3.89213	3.92549	3.90654	4.78637	6.6365	5.13791	5.17928	5.56325	5.11248	4.52892	8.23568	7.31386	8.64214	8.94304	8.64187
4169.26	4.93922	4.51286	4.32696	4.04896	3.8771	3.93146	3.88524	4.77296	6.61086	5.10394	5.16358	5.54628	5.10236	4.49942	8.21455	7.29417	8.64016	8.87907	8.63213
4170.75	4.92551	4.50769	4.29748	4.03028	3.86002	3.94237	3.87446	4.74847	6.57851	5.09321	5.14975	5.52899	5.08218	4.45561	8.20667	7.28283	8.64279	8.86888	8.63299
4172.24	4.90735	4.49915	4.28034	4.02194	3.84887	3.93594	3.86958	4.73267	6.5344	5.09428	5.13771	5.51668	5.04435	4.44591	8.19804	7.2695	8.6546	8.89202	8.62905
4173.74	4.89691	4.47459	4.26562	4.01838	3.82937	3.90875	3.86414	4.71355	6.50865	5.09269	5.12873	5.50939	5.01991	4.46281	8.18748	7.25805	8.66062	8.9036	8.61752
4175.23	4.88326	4.4514	4.25458	4.0134	3.81353	3.88513	3.85667	4.69846	6.50814	5.0779	5.11465	5.50501	5.01497	4.47421	8.1331	7.22339	8.62104	8.8871	8.60302
4176.72	4.86724	4.4286	4.24213	3.99829	3.80695	3.87198	3.85087	4.68975	6.51029	5.05972	5.09608	5.4914	5.01006	4.45229	8.05729	7.17772	8.56163	8.85911	8.58808
4178.22	4.84573	4.40282	4.22661	3.97918	3.79779	3.86336	3.84303	4.67592	6.50176	5.04498	5.08327	5.47126	5.00333	4.41312	8.02662	7.16243	8.53033	8.82113	8.57075
4179.71	4.81672	4.39784	4.22407	3.97264	3.79238	3.86056	3.82586	4.66468	6.47641	5.01746	5.06726	5.46075	4.99257	4.39599	8.02114	7.16219	8.50448	8.74683	8.55309
4181.2	4.80225	4.40775	4.23517	3.97144	3.78	3.85989	3.811	4.64712	6.45535	4.99879	5.05583	5.45282	4.98146	4.38901	8.01852	7.15807	8.4847	8.6977	8.51583
4182.69	4.79554	4.41263	4.24161	3.96933	3.76857	3.8563	3.79709	4.63064	6.43321	4.99034	5.0537	5.44325	4.96356	4.38005	8.00883	7.1446	8.49922	8.7009	8.47768
4184.18	4.78949	4.40327	4.21886	3.9462	3.75847	3.83407	3.77988	4.61381	6.4044	4.97795	5.05195	5.43145	4.94203	4.3665	7.99405	7.12663	8.52474	8.71772	8.45969
4185.67	4.77479	4.39029	4.18101	3.90955	3.73922	3.80255	3.77303	4.58738	6.39386	4.96913	5.04121	5.41782	4.9338	4.35023	7.9743	7.10127	8.51079	8.7089	8.44276
4187.16	4.74937	4.37839	4.15916	3.88886	3.72535	3.78903	3.7735	4.57192	6.39334	4.95854	5.02099	5.40254	4.93191	4.34172	7.93382	7.05253	8.4569	8.66754	8.4238
4188.65	4.73847	4.35966	4.14279	3.87199	3.71204	3.78552	3.76788	4.56306	6.3831	4.94665	4.99787	5.37649	4.92522	4.33976	7.89991	7.01571	8.40762	8.63368	8.38434
4190.14	4.74056	4.34482	4.12759	3.85665	3.70034	3.77992	3.75063	4.55424	6.34366	4.92818	4.96166	5.35274	4.89712	4.33811	7.88295	7.00152	8.36286	8.60936	8.34299
4191.63	4.73931	4.33246	4.12208	3.85409	3.68322	3.77384	3.73249	4.54031	6.29569	4.90762	4.92082	5.33686	4.86001	4.32168	7.87187	6.9943	8.32145	8.58276	8.3172
4193.12	4.71783	4.31482	4.1213	3.85725	3.65542	3.76866	3.71585	4.52167	6.27771	4.90149	4.90753	5.323	4.84714	4.29527	7.85997	6.98437	8.29148	8.55388	8.28845
4194.61	4.68148	4.30541	4.11395	3.85465	3.64977	3.76113	3.69247	4.51186	6.27443	4.90389	4.90869	5.3105	4.84689	4.27918	7.8395	6.96358	8.24865	8.51781	8.26783
4196.09	4.66472	4.29858	4.09858	3.84945	3.67552	3.74735	3.6784	4.51142	6.26776	4.90143	4.90738	5.29341	4.84325	4.26781	7.821	6.94688	8.22303	8.49908	8.23876
4197.58	4.66844	4.29039	4.08681	3.84518	3.69801	3.7367	3.67936	4.50818	6.24996	4.8771	4.90161	5.27891	4.82483	4.25839	7.78317	6.92361	8.20498	8.49106	8.20891
4199.07	4.67016	4.27913	4.08334	3.8311	3.69103	3.73264	3.68273	4.4916	6.22796	4.84474	4.89636	5.2543	4.80128	4.24324	7.73684	6.89455	8.18492	8.48147	8.19177
4200.55	4.64736	4.26557	4.08338	3.81092	3.67114	3.72891	3.6745	4.46797	6.20255	4.83256	4.88368	5.22106	4.78319	4.22359	7.72469	6.87751	8.18168	8.46548	8.17667
4202.04	4.60485	4.25291	4.0747	3.79701	3.65413	3.71838	3.64665	4.45116	6.16402	4.82487	4.85906	5.2048	4.7557	4.21403	7.73899	6.86182	8.1863	8.42683	8.16534
4203.53	4.58041	4.24056	4.04268	3.77754	3.62313	3.69579	3.62685	4.42998	6.14261	4.81427	4.83987	5.19971	4.73554	4.21056	7.74549	6.84287	8.1884	8.39931	8.1432
4205.01	4.56841	4.2303	4.0169	3.76023	3.59539	3.67783	3.62433	4.41443	6.14835	4.7884	4.82116	5.19288	4.72852	4.20744	7.71635	6.79817	8.16406	8.37557	8.12042
4206.49	4.56043	4.21977	4.01035	3.74015	3.58725	3.6602	3.62356	4.41629	6.15489	4.75493	4.79763	5.17704	4.72235	4.19641	7.66997	6.74694	8.12701	8.34693	8.10489
4207.98	4.55907	4.20686	4.00785	3.71709	3.58296	3.63905	3.6188	4.42215	6.13773	4.74086	4.78509	5.15611	4.71621	4.18122	7.63418	6.73124	8.10509	8.32751	8.08304
4209.46	4.56086	4.19046	3.99993	3.71077	3.57802	3.62795	3.60844	4.41942	6.093	4.73395	4.77294	5.13259	4.70737	4.17224	7.59948	6.73561	8.07962	8.31085	8.06977
4210.95	4.55571	4.157	3.98113	3.71389	3.56385	3.61972	3.59996	4.4085	6.06435	4.72559	4.76307	5.09363	4.69375	4.15951	7.57379	6.73645	8.05638	8.29605	8.05676
4212.43	4.53397	4.13098	3.96671	3.71678	3.55156	3.61192	3.59417	4.39534	6.06093	4.71073	4.75379	5.06562	4.66568	4.14738	7.55961	6.73686	8.03134	8.28385	8.03936
4213.91	4.51102	4.12527	3.96004	3.71147	3.5476	3.59948	3.58553	4.37358	6.05759	4.6933	4.74093	5.06448	4.63482	4.13491	7.54829	6.73698	8.00329	8.26908	8.01286
4215.39	4.49877	4.12271	3.95428	3.70045	3.54266	3.58395	3.57435	4.34157	6.05499	4.6825	4.72173	5.07171	4.6266	4.11991	7.53298	6.72617	7.98158	8.23747	7.97476
4216.88	4.48578	4.11609	3.94513	3.69285	3.53818	3.57593	3.56357	4.32953	6.0538	4.67312	4.69119	5.06926	4.62942	4.10759	7.51291	6.70367	7.96417	8.18351	7.94581
4218.36	4.47412	4.09843	3.92324	3.68091	3.53577	3.56889	3.55395	4.34105	6.04435	4.66383	4.67217	5.0562	4.62751	4.0943	7.49654	6.68365	7.94852	8.14931	7.90001
4219.84	4.45585	4.08487	3.90389	3.66929	3.53239	3.56014	3.54193	4.34922	6.0162	4.65678	4.67965	5.04568	4.61594	4.08125	7.48139	6.66405	7.93182	8.153	7.85766
4221.32	4.43957	4.08101	3.90395	3.65638	3.52426	3.55413	3.52894	4.33114	5.98311	4.65193	4.69233	5.02287	4.60416	4.07271	7.46474	6.64298	7.91258	8.16481	7.84167
4222.8	4.42957	4.07723	3.91196	3.64075	3.51371	3.551	3.51921	4.2991	5.95548	4.64226	4.68665	4.99183	4.58975	4.06653	7.43751	6.61953	7.88757	8.1372	7.83192
4224.28	4.41344	4.06853	3.9058	3.63247	3.50447	3.54622	3.50923	4.28131	5.92143	4.62462	4.67062	4.97365	4.56249	4.05542	7.38983	6.58553	7.85564	8.06244	7.82813
4225.76	4.40497	4.04404	3.88162	3.63172	3.48811	3.53423	3.50032	4.27011	5.89942	4.60825	4.65629	4.95583	4.54593	4.03618	7.36371	6.55679	7.83327	8.02128	7.82558
4227.24	4.40775	4.02128	3.86088	3.6301	3.47233	3.52501	3.49035	4.25874	5.89873	4.58929	4.64058	4.94335	4.54549	4.02364	7.34862	6.52372	7.80619	8.0227	7.82212
4228.72	4.40993	4.00855	3.84777	3.62178	3.45946	3.51183	3.47932	4.24303	5.9036	4.5698	4.62489	4.9438	4.54491	4.01715	7.33305	6.49449	7.7782	8.03044	7.80821
4230.2	4.40022	3.99671	3.83574	3.60965	3.44476	3.49338	3.46654	4.22344	5.89094	4.55587	4.60893	4.9482	4.53207	4.00864	7.31401	6.48756	7.7645	8.01822	7.78044
4231.67	4.38232	3.98691	3.82488	3.59783	3.43392	3.48506	3.44905	4.21103	5.85575	4.53705	4.58201	4.93939	4.50376	3.99756	7.27412	6.48725	7.75081	7.98061	7.75887
4233.15	4.36807	3.97575	3.81359	3.58435	3.40724	3.48528	3.4396	4.19638	5.82954	4.52556	4.56131	4.91014	4.48499	3.98446	7.24421	6.48461	7.73334	7.95016	7.72184
4234.63	4.34781	3.96706	3.80635	3.57476	3.38828	3.48364	3.43286	4.18494	5.81735	4.51925	4.54504	4.8909	4.47776	3.9722	7.21405	6.46211	7.68886	7.91607	7.6872
4236.1	4.32494	3.96029	3.7968	3.56367	3.39412	3.46778	3.42215	4.17298	5.80812	4.51035	4.52684	4.88639	4.4695	3.94024	7.1858	6.4335	7.6406	7.87964	7.6589
4237.58	4.3072	3.95251	3.78433	3.55167	3.40392	3.44703	3.40831	4.15391	5.80013	4.50193	4.51296	4.88241	4.45063	3.90344	7.1726	6.40262	7.61274	7.84828	7.62171
4239.06	4.2924	3.9457	3.77546	3.54165	3.40191	3.43686	3.38527	4.14359	5.78716	4.49073	4.49816	4.85878	4.41702	3.89409	7.16104	6.35023	7.58119	7.81115	7.60436
4240.53	4.28273	3.9349	3.76469	3.51908	3.38202	3.42586	3.36741	4.12719	5.77272	4.4752	4.48551	4.80602	4.39819	3.89708	7.15392	6.32471	7.5639	7.79125	7.58483
4242.01	4.27501	3.92379	3.75688	3.49933	3.3639	3.41643	3.35158	4.11187	5.74542	4.44466	4.46991	4.7762	4.39642	3.89772	7.15232	6.32596	7.5543	7.78948	7.56369
4243.48	4.26637	3.91042	3.74964	3.4851	3.34737	3.4098	3.33763	4.09875	5.71499	4.41533	4.45528	4.77722	4.39612	3.89321	7.1516	6.32907	7.54861	7.79404	7.53767
4244.96	4.25361	3.89292	3.7406	3.47208	3.32303	3.4026	3.33235	4.08346	5.69739	4.4067	4.44433	4.78542	4.39532	3.88754	7.13849	6.31681	7.5329	7.78735	7.50717
4246.43	4.23745	3.87812	3.72555	3.46148	3.31023	3.39244	3.32583	4.07618	5.68078	4.40316	4.42866	4.78159	4.39124	3.87896	7.10781	6.29203	7.49307	7.76087	7.49737
4247.9	4.22536	3.86217	3.69536	3.44497	3.30333	3.37454	3.32246	4.06508	5.66963	4.40052	4.41985	4.75937	4.38611	3.86087	7.08541	6.27974	7.47438	7.74105	7.49278
4249.38	4.20437	3.8484	3.67606	3.43295	3.29941	3.36205	3.32345	4.05734	5.65419	4.39118	4.41318	4.74494	4.3779	3.84957	7.04261	6.26711	7.46953	7.70645	7.48414
4250.85	4.18447	3.83009	3.67317	3.42706	3.29639	3.34022	3.3243	4.05525	5.63713	4.38169	4.40675	4.7264	4.36979	3.84137	7.00388	6.25099	7.46592	7.67595	7.45641
4252.32	4.16372	3.80959	3.67393	3.42148	3.29411	3.3156	3.3204	4.05291	5.62159	4.37551	4.40325	4.70655	4.35624	3.83268	6.98798	6.22792	7.4375	7.672	7.41753
4253.79	4.13101	3.8069	3.6675	3.41325	3.29351	3.31503	3.31172	4.05062	5.59693	4.36451	4.39444	4.70092	4.33149	3.82168	6.96766	6.19525	7.37833	7.67078	7.39406
4255.26	4.11989	3.8129	3.64794	3.40067	3.2864	3.32604	3.2987	4.04151	5.58141	4.3549	4.38463	4.69892	4.3092	3.80448	6.95946	6.17745	7.35315	7.66098	7.36096
4256.74	4.12499	3.81672	3.63479	3.39303	3.2777	3.33034	3.27394	4.02784	5.57514	4.33344	4.37075	4.69491	4.28103	3.7964	6.94628	6.15895	7.35165	7.61417	7.34468
4258.21	4.13053	3.80803	3.6189	3.38769	3.2668	3.30963	3.25087	3.9985	5.56851	4.30903	4.35493	4.67201	4.257	3.78773	6.93418	6.14531	7.35445	7.56726	7.34038
4259.68	4.11832	3.79343	3.60212	3.38316	3.25105	3.28207	3.24256	3.96452	5.55525	4.29318	4.33656	4.646	4.24968	3.77931	6.93004	6.13833	7.33554	7.54181	7.3275
4261.15	4.09217	3.78018	3.59532	3.37455	3.23295	3.27007	3.23961	3.95852	5.53526	4.27503	4.31466	4.63346	4.24386	3.76812	6.92236	6.12935	7.29429	7.51651	7.31773
4262.62	4.08526	3.75375	3.58678	3.35379	3.21057	3.25974	3.23652	3.96471	5.51875	4.25938	4.30282	4.62374	4.23225	3.74655	6.91107	6.13162	7.27738	7.5025	7.29881
4264.08	4.08812	3.73554	3.5807	3.33975	3.1979	3.25472	3.22503	3.96651	5.49997	4.23861	4.29583	4.61949	4.2045	3.73604	6.8932	6.13376	7.27142	7.48668	7.27864
4265.55	4.08608	3.72708	3.57769	3.33051	3.19484	3.25462	3.2145	3.94396	5.48184	4.22508	4.2912	4.61735	4.18221	3.73268	6.8731	6.13082	7.26804	7.47812	7.25055
4267.02	4.06773	3.71878	3.57529	3.32262	3.19211	3.25472	3.20591	3.91514	5.46341	4.22904	4.27879	4.6143	4.18069	3.73276	6.82869	6.08923	7.25106	7.46834	7.22051
4268.49	4.04126	3.71502	3.5643	3.31604	3.18888	3.24508	3.19275	3.90938	5.44123	4.23697	4.2555	4.60081	4.18323	3.73081	6.76843	6.01951	7.2224	7.44956	7.20299
4269.96	4.02735	3.70838	3.53992	3.30575	3.18148	3.22256	3.19177	3.9062	5.42869	4.23494	4.24754	4.57725	4.18624	3.72154	6.74761	5.99116	7.21525	7.44329	7.18085
4271.42	4.01205	3.70203	3.52436	3.30027	3.17651	3.21171	3.20216	3.90312	5.41823	4.21176	4.24815	4.56337	4.19022	3.7131	6.74766	5.98217	7.22279	7.4291	7.16737
4272.89	4.00309	3.68558	3.51709	3.29947	3.17425	3.2141	3.20768	3.8901	5.40886	4.19424	4.2464	4.54734	4.19196	3.6963	6.75124	5.97914	7.2248	7.41449	7.16118
4274.36	4.00418	3.66675	3.51174	3.30013	3.1707	3.21804	3.19725	3.87391	5.39815	4.19402	4.2386	4.53333	4.18242	3.68202	6.74209	5.98033	7.19721	7.3884	7.15641
4275.82	4.00439	3.66595	3.50523	3.28769	3.16076	3.21242	3.18065	3.86868	5.38364	4.19444	4.22444	4.51705	4.16512	3.67075	6.72372	5.98349	7.1532	7.35203	7.14575
4277.29	3.99719	3.67267	3.49575	3.25953	3.14118	3.19693	3.16991	3.86483	5.37122	4.188	4.21035	4.49558	4.15177	3.65601	6.71129	5.98893	7.12276	7.33179	7.11774
4278.75	3.97144	3.67048	3.4902	3.2441	3.12884	3.18571	3.15798	3.85681	5.35321	4.1673	4.19413	4.48556	4.13944	3.64951	6.69077	5.99471	7.09336	7.31226	7.09187
4280.22	3.95188	3.63922	3.48105	3.23161	3.12286	3.17405	3.14869	3.83189	5.34038	4.14813	4.18366	4.47673	4.12668	3.65384	6.67501	5.98911	7.07661	7.2954	7.04579
4281.68	3.94858	3.6065	3.47312	3.22071	3.11784	3.16215	3.13905	3.8078	5.33296	4.13727	4.18203	4.46759	4.1138	3.65298	6.64648	5.94311	7.06772	7.26802	7.00317
4283.15	3.94674	3.60592	3.46326	3.21757	3.11463	3.1521	3.12487	3.80336	5.32393	4.12825	4.18116	4.45927	4.10044	3.6278	6.61234	5.8844	7.05821	7.2364	6.99106
4284.61	3.93834	3.61628	3.44656	3.21638	3.1098	3.14252	3.11123	3.80287	5.31017	4.11276	4.16722	4.44964	4.08066	3.59098	6.59971	5.86233	7.04123	7.22516	6.98088
4286.07	3.92017	3.61516	3.43846	3.21725	3.09947	3.13952	3.09308	3.79788	5.28259	4.08538	4.13431	4.43434	4.0508	3.56798	6.58386	5.85596	6.9951	7.2264	6.9767
4287.54	3.90926	3.59272	3.43989	3.22302	3.07777	3.14817	3.08108	3.77689	5.26208	4.06744	4.10601	4.40261	4.03081	3.55319	6.57465	5.85009	6.96214	7.21938	6.96536
4289	3.91234	3.57076	3.44042	3.22548	3.05756	3.15512	3.0757	3.75643	5.24646	4.05706	4.08851	4.38093	4.01947	3.54231	6.5671	5.83676	6.95227	7.19298	6.94968
4290.46	3.91631	3.56252	3.42486	3.20005	3.04479	3.13486	3.06981	3.74891	5.22694	4.0456	4.07485	4.37018	4.00854	3.54195	6.55529	5.82293	6.94997	7.16455	6.92938
4291.92	3.90859	3.55582	3.39925	3.15875	3.03055	3.09952	3.06694	3.74226	5.2166	4.04384	4.07934	4.3614	4.00121	3.54744	6.53513	5.81297	6.938	7.14438	6.90464
4293.38	3.88806	3.54489	3.38228	3.14552	3.02969	3.08331	3.06495	3.7388	5.21058	4.04671	4.10066	4.35654	3.99038	3.54273	6.50174	5.79693	6.90319	7.11688	6.89586
4294.84	3.8685	3.51938	3.36071	3.1584	3.04541	3.07166	3.05747	3.73974	5.20081	4.04385	4.10307	4.34913	3.98274	3.52237	6.48392	5.78448	6.88391	7.10373	6.88687
4296.3	3.84775	3.49938	3.34509	3.16654	3.05516	3.06184	3.03798	3.73762	5.1801	4.02163	4.05951	4.34514	3.9818	3.51045	6.47271	5.76093	6.87721	7.0868	6.87433
4297.76	3.826	3.49835	3.3521	3.15553	3.03377	3.06354	3.01947	3.72314	5.16006	3.99533	4.01306	4.34319	3.9816	3.50055	6.45999	5.73684	6.86982	7.06702	6.85492
4299.22	3.80725	3.49943	3.36715	3.13684	2.99757	3.07011	3.00972	3.70335	5.15233	3.98366	4.00666	4.34021	3.96876	3.48973	6.43723	5.72549	6.84382	7.05007	6.8318
4300.68	3.7846	3.49945	3.36424	3.12304	2.988	3.06589	3.00015	3.69583	5.14845	3.97588	4.01692	4.32447	3.94379	3.48134	6.40008	5.71461	6.79551	7.02685	6.81736
4302.14	3.77226	3.50019	3.33943	3.10932	2.99014	3.04436	2.99518	3.69611	5.13954	3.96533	4.01576	4.28827	3.92273	3.4671	6.38324	5.70603	6.77445	7.01467	6.79467
4303.6	3.77414	3.49666	3.3199	3.09975	2.98833	3.03116	2.99241	3.69246	5.11604	3.94678	3.99195	4.27113	3.89664	3.45926	6.38438	5.67761	6.7595	6.9951	6.77284
4305.06	3.77816	3.47652	3.30985	3.09102	2.9723	3.02216	2.98987	3.66899	5.09478	3.93252	3.97027	4.26671	3.87778	3.45071	6.38337	5.65296	6.74869	6.97498	6.74783
4306.51	3.77357	3.4472	3.30138	3.08005	2.95038	3.0096	2.98231	3.63705	5.08072	3.93238	3.96307	4.26244	3.8829	3.44238	6.35823	5.64889	6.74127	6.94998	6.71822
4307.97	3.76308	3.43344	3.29088	3.06794	2.94436	2.99387	2.9681	3.62709	5.06216	3.93729	3.95602	4.26283	3.89393	3.44044	6.32027	5.64531	6.72625	6.9125	6.69533
4309.43	3.75441	3.4273	3.27409	3.05368	2.94521	2.96806	2.96327	3.62408	5.04734	3.93413	3.95088	4.26829	3.89569	3.43947	6.30984	5.63594	6.71298	6.89345	6.66689
4310.88	3.73581	3.42185	3.26434	3.04682	2.9455	2.95724	2.96684	3.62103	5.02984	3.91114	3.94695	4.26686	3.87921	3.43383	6.31848	5.60409	6.67914	6.87658	6.65231
4312.34	3.71918	3.40943	3.26158	3.04485	2.93833	2.97292	2.96809	3.61098	5.01666	3.892	3.94255	4.24479	3.85998	3.40372	6.32618	5.57968	6.65237	6.86295	6.65865
4313.8	3.71557	3.39351	3.26221	3.04464	2.92591	2.99435	2.94992	3.59587	5.01007	3.88706	3.92682	4.22052	3.83372	3.3759	6.30936	5.57005	6.6522	6.85686	6.66201
4315.25	3.71231	3.38761	3.26356	3.05111	2.90922	2.99156	2.91998	3.58197	5.00198	3.88271	3.90228	4.20253	3.80128	3.37363	6.27665	5.55962	6.65837	6.85369	6.63697
4316.71	3.70597	3.38219	3.25759	3.06195	2.8811	2.96424	2.90666	3.56442	4.98911	3.87855	3.88719	4.18463	3.79635	3.379	6.25178	5.55262	6.65278	6.84404	6.59398
4318.16	3.67617	3.37463	3.24526	3.06453	2.86973	2.94829	2.90261	3.55452	4.96266	3.86954	3.87675	4.17637	3.8116	3.37592	6.21255	5.53905	6.63276	6.80845	6.5679
4319.61	3.65316	3.36155	3.20864	3.04908	2.88436	2.94881	2.89978	3.54949	4.943	3.8598	3.86768	4.17623	3.8179	3.36637	6.18816	5.53055	6.61822	6.78843	6.54321
4321.07	3.65759	3.3487	3.17425	3.03171	2.89836	2.95195	2.90495	3.54448	4.93602	3.8457	3.85896	4.17271	3.80606	3.35731	6.18241	5.52661	6.58647	6.76968	6.52459
4322.52	3.66552	3.34311	3.17982	3.01618	2.88981	2.93704	2.91412	3.54101	4.93154	3.82996	3.85168	4.14844	3.79053	3.33536	6.17922	5.52073	6.54949	6.74492	6.52484
4323.97	3.6627	3.33609	3.20543	2.99446	2.86894	2.90654	2.91058	3.53537	4.92378	3.81959	3.84729	4.11683	3.77517	3.30761	6.16684	5.50713	6.53623	6.7278	6.52457
4325.43	3.64508	3.33322	3.21349	2.9823	2.85538	2.89487	2.89239	3.52632	4.90491	3.80667	3.84025	4.10317	3.7533	3.30191	6.1292	5.47572	6.50629	6.684	6.51324
4326.88	3.62798	3.336	3.20171	2.97595	2.84123	2.90088	2.87897	3.50637	4.88866	3.79675	3.8347	4.09259	3.74129	3.30918	6.10295	5.45272	6.49029	6.65761	6.47407
4328.33	3.61567	3.33452	3.18862	2.97253	2.83002	2.90792	2.86475	3.4887	4.87278	3.7878	3.81853	4.08702	3.73742	3.31084	6.07706	5.43419	6.46724	6.64547	6.44453
4329.78	3.60545	3.31947	3.17485	2.96639	2.82784	2.89852	2.84769	3.47736	4.85523	3.77812	3.79742	4.08165	3.73309	3.29482	6.05528	5.41693	6.44469	6.63638	6.44035
4331.23	3.60224	3.29881	3.15885	2.95668	2.82452	2.87775	2.83731	3.46194	4.83973	3.76853	3.78014	4.07743	3.72631	3.27618	6.06133	5.39997	6.44153	6.62533	6.43658
4332.68	3.59894	3.28617	3.15128	2.95216	2.82419	2.86465	2.82772	3.45883	4.82193	3.75566	3.75895	4.07984	3.71251	3.27218	6.08411	5.37439	6.43656	6.60218	6.42327
4334.13	3.59718	3.27199	3.14225	2.94269	2.8246	2.8479	2.81944	3.46343	4.80798	3.74833	3.75126	4.08173	3.7026	3.27316	6.08809	5.35706	6.43659	6.58911	6.38814
4335.58	3.57784	3.26116	3.13472	2.93377	2.82297	2.83657	2.8107	3.46579	4.79242	3.74468	3.75555	4.08227	3.69493	3.27339	6.03846	5.3359	6.43508	6.56998	6.36336
4337.03	3.55042	3.25975	3.12138	2.92481	2.81667	2.8389	2.8055	3.45772	4.77787	3.7417	3.75794	4.07112	3.68802	3.27231	5.99285	5.3214	6.43024	6.55479	6.34546
4338.48	3.54044	3.25646	3.10281	2.91477	2.80837	2.84357	2.81264	3.4444	4.77762	3.73443	3.74954	4.05433	3.6791	3.26874	5.98873	5.32228	6.41302	6.55194	6.32314
4339.93	3.53477	3.24986	3.09293	2.90812	2.80115	2.83506	2.82533	3.44015	4.78551	3.72208	3.73393	4.03052	3.66735	3.25121	5.98934	5.32437	6.38099	6.54673	6.30966
4341.38	3.52892	3.23225	3.08836	2.89857	2.78897	2.81095	2.82538	3.4407	4.78477	3.71324	3.72686	3.99693	3.6582	3.22079	5.97753	5.31879	6.35418	6.53617	6.28972
4342.83	3.51393	3.21818	3.08674	2.89371	2.77713	2.79729	2.80822	3.43811	4.77039	3.70147	3.72225	3.9844	3.64097	3.20896	5.92539	5.29087	6.32417	6.51465	6.27733
4344.27	3.49978	3.21424	3.08468	2.88488	2.7636	2.79616	2.79278	3.4148	4.75442	3.69137	3.7152	3.97725	3.62716	3.21266	5.88766	5.26714	6.30318	6.49752	6.2726
4345.72	3.493	3.21051	3.08156	2.87502	2.74864	2.79767	2.78154	3.38379	4.73591	3.68607	3.69434	3.97146	3.62461	3.21626	5.88824	5.25017	6.29309	6.47774	6.26682
4347.17	3.48179	3.20642	3.07501	2.8755	2.73908	2.80022	2.76908	3.37346	4.71192	3.67824	3.66518	3.96432	3.62279	3.21531	5.89445	5.23162	6.28624	6.45049	6.26025
4348.61	3.4778	3.20069	3.06145	2.87834	2.729	2.80193	2.76037	3.36682	4.68847	3.66675	3.66202	3.95259	3.6171	3.21334	5.88797	5.22823	6.28388	6.43468	6.25698
4350.06	3.47791	3.19834	3.05113	2.87774	2.72568	2.79801	2.75314	3.36113	4.66558	3.65232	3.68179	3.94029	3.6045	3.20804	5.86384	5.23701	6.27617	6.42544	6.23925
4351.5	3.47815	3.19737	3.0368	2.86493	2.73627	2.77085	2.74873	3.35519	4.64965	3.64152	3.691	3.91424	3.59465	3.19606	5.84867	5.23101	6.25975	6.41582	6.18208
4352.95	3.47394	3.19248	3.0233	2.85023	2.74702	2.74199	2.74549	3.34723	4.6454	3.63118	3.67662	3.89462	3.59046	3.18419	5.83471	5.18759	6.20501	6.39229	6.13185
4354.39	3.46415	3.17712	3.0159	2.84418	2.73962	2.73542	2.74091	3.33009	4.64565	3.62198	3.65802	3.88946	3.58719	3.16125	5.8192	5.14263	6.1511	6.36404	6.113
4355.84	3.45479	3.14722	3.00943	2.84094	2.72163	2.73828	2.72073	3.30539	4.63869	3.61098	3.63585	3.88726	3.56495	3.13569	5.80246	5.13459	6.15085	6.34112	6.09925
4357.28	3.43497	3.13175	3.00755	2.83731	2.71093	2.73714	2.68456	3.29694	4.62445	3.59256	3.60337	3.87867	3.52222	3.13225	5.76779	5.14126	6.16599	6.31476	6.09595
4358.73	3.41895	3.13507	3.00723	2.82682	2.70424	2.72928	2.66901	3.30194	4.61336	3.58101	3.58624	3.86079	3.50368	3.14226	5.74981	5.13871	6.16266	6.30068	6.0952
4360.17	3.41476	3.13945	3.00631	2.81699	2.69695	2.72243	2.67478	3.30439	4.59762	3.57524	3.58502	3.84831	3.51819	3.14441	5.72695	5.11154	6.12291	6.28126	6.09031
4361.61	3.4133	3.1403	2.99252	2.79952	2.68251	2.72173	2.68132	3.29525	4.58104	3.56654	3.58431	3.82567	3.53155	3.12709	5.7045	5.08626	6.08686	6.26224	6.07249
4363.05	3.40774	3.14115	2.97071	2.7752	2.66294	2.72169	2.6784	3.28044	4.55744	3.55397	3.57372	3.8031	3.51331	3.10576	5.68227	5.0749	6.08188	6.25429	6.05159
4364.5	3.39278	3.13279	2.96364	2.76281	2.65898	2.71417	2.6674	3.26699	4.52472	3.53894	3.5543	3.79663	3.47616	3.08493	5.65018	5.06072	6.08455	6.24966	6.03391
4365.94	3.38381	3.10422	2.96699	2.7535	2.66329	2.69775	2.66028	3.24613	4.50993	3.52442	3.54632	3.79294	3.46314	3.05664	5.64587	5.05001	6.07863	6.24271	6.00693
4367.38	3.37497	3.07831	2.96792	2.7463	2.66204	2.68585	2.65283	3.23282	4.50635	3.50733	3.55082	3.78865	3.47496	3.04919	5.66086	5.02662	6.04751	6.21986	5.98517
4368.82	3.36482	3.06451	2.94579	2.74258	2.64554	2.67558	2.64672	3.23504	4.50308	3.49538	3.55424	3.76783	3.48541	3.06378	5.67086	5.00597	6.01885	6.19924	5.95937
4370.26	3.35787	3.04898	2.91539	2.73956	2.62606	2.66545	2.64418	3.24011	4.49168	3.48311	3.53639	3.74825	3.47375	3.07636	5.65043	4.99535	5.99459	6.1713	5.9342
4371.7	3.34228	3.04448	2.90602	2.73656	2.61324	2.65699	2.64194	3.23414	4.47568	3.46882	3.5073	3.74512	3.45252	3.07179	5.61596	4.98622	5.96561	6.1327	5.92717
4373.14	3.32898	3.0463	2.90876	2.73417	2.59489	2.64406	2.63343	3.21596	4.46754	3.46309	3.49243	3.74727	3.44238	3.05859	5.59603	4.97478	5.9403	6.10673	5.92813
4374.58	3.30256	3.04501	2.90769	2.73137	2.58815	2.63835	2.61404	3.20316	4.45722	3.45915	3.48459	3.74298	3.43161	3.0419	5.56955	4.9549	5.90137	6.07459	5.92032
4376.02	3.27923	3.03541	2.89463	2.71657	2.59216	2.64327	2.60225	3.19057	4.445	3.45475	3.47961	3.72393	3.41796	3.01042	5.55195	4.93728	5.88012	6.05719	5.89552
4377.46	3.27526	3.02397	2.88233	2.70141	2.59594	2.64753	2.59236	3.17733	4.42774	3.44147	3.46849	3.70916	3.39304	2.98839	5.53566	4.91581	5.87782	6.05921	5.87328
4378.89	3.2735	3.00999	2.87808	2.68654	2.59388	2.63821	2.58069	3.17164	4.40887	3.4265	3.45503	3.69233	3.3691	2.98045	5.51979	4.89603	5.87581	6.06002	5.85339
4380.33	3.26935	2.98407	2.87273	2.66262	2.58365	2.61968	2.57566	3.1656	4.39602	3.41843	3.44297	3.67361	3.35708	2.97697	5.51021	4.88425	5.8701	6.03804	5.82913
4381.77	3.24829	2.97104	2.86435	2.64982	2.56899	2.60801	2.57194	3.1597	4.38434	3.40884	3.42521	3.66269	3.34504	2.98101	5.49784	4.86985	5.86647	5.99775	5.81573
4383.21	3.23166	2.97222	2.83943	2.64384	2.54161	2.59896	2.56936	3.15353	4.37515	3.40088	3.41042	3.64608	3.34339	2.99373	5.48848	4.86498	5.85376	5.97599	5.808
4384.64	3.23289	2.97196	2.81733	2.63899	2.52432	2.59045	2.56489	3.14763	4.36854	3.39332	3.39175	3.63624	3.35266	2.99572	5.47787	4.86141	5.80368	5.96795	5.80099
4386.08	3.23745	2.964	2.81533	2.63648	2.53402	2.5831	2.55973	3.14182	4.36343	3.38684	3.37664	3.62377	3.35885	2.9789	5.4655	4.85585	5.7634	5.96262	5.78544
4387.51	3.23375	2.94725	2.82123	2.63503	2.54917	2.57659	2.55005	3.13625	4.34715	3.37797	3.38324	3.61416	3.35053	2.96001	5.44624	4.83119	5.76498	5.94578	5.76721
4388.95	3.21807	2.93496	2.81918	2.63092	2.54606	2.57077	2.53764	3.13073	4.32354	3.3655	3.39931	3.61728	3.33412	2.94576	5.42375	4.7921	5.77237	5.91767	5.74462
4390.39	3.20761	2.92562	2.80508	2.62191	2.52532	2.56359	2.53454	3.12434	4.31352	3.35799	3.39963	3.62361	3.32274	2.92856	5.41196	4.78441	5.75968	5.89856	5.71273
4391.82	3.20223	2.91969	2.79013	2.61631	2.51162	2.55946	2.53457	3.11939	4.30881	3.35288	3.37953	3.6231	3.31001	2.91865	5.39354	4.79196	5.72262	5.87217	5.68671
4393.25	3.19616	2.9213	2.7735	2.61738	2.50291	2.5647	2.53142	3.10739	4.30389	3.34746	3.35806	3.61162	3.30154	2.90737	5.37699	4.79056	5.69808	5.85708	5.64732
4394.69	3.18727	2.92624	2.76027	2.61993	2.49305	2.57135	2.51428	3.09011	4.2786	3.33134	3.33822	3.6016	3.2929	2.89812	5.3353	4.75483	5.68742	5.8487	5.61521
4396.12	3.17074	2.9234	2.76181	2.6126	2.49303	2.56013	2.49242	3.06825	4.24644	3.31069	3.32167	3.58758	3.28077	2.88984	5.28686	4.71392	5.67731	5.83522	5.6072
4397.55	3.16086	2.90823	2.77171	2.59263	2.49654	2.53167	2.48008	3.03508	4.23309	3.30071	3.31632	3.56928	3.26756	2.88211	5.28291	4.70895	5.66933	5.8117	5.60304
4398.99	3.14633	2.89598	2.77683	2.58106	2.49517	2.51808	2.46935	3.02194	4.22242	3.29576	3.31728	3.56356	3.24923	2.88065	5.29751	4.7172	5.65424	5.76709	5.59835
4400.42	3.13551	2.88451	2.76729	2.57629	2.48063	2.51297	2.46325	3.02551	4.21416	3.28978	3.31833	3.56191	3.23558	2.88005	5.29992	4.71604	5.64031	5.74285	5.58746
4401.85	3.13942	2.87069	2.75745	2.57474	2.46572	2.50896	2.45926	3.02769	4.20483	3.2745	3.30795	3.55512	3.22192	2.87811	5.27445	4.70059	5.61287	5.74171	5.57984
4403.28	3.1455	2.86454	2.75048	2.56634	2.44873	2.503	2.45397	3.02032	4.19438	3.26048	3.29677	3.53749	3.20916	2.85726	5.24684	4.68323	5.59014	5.74308	5.56474
4404.71	3.14172	2.85655	2.73833	2.5493	2.4247	2.49383	2.45032	3.00709	4.18517	3.26176	3.27858	3.52216	3.20983	2.83606	5.22556	4.65878	5.58378	5.73225	5.54871
4406.15	3.11522	2.84931	2.72638	2.53919	2.41939	2.4863	2.44861	3.00049	4.1746	3.27066	3.24975	3.51966	3.21794	2.83632	5.20006	4.62743	5.57528	5.71515	5.54712
4407.58	3.09206	2.83713	2.70674	2.52681	2.4241	2.47113	2.44925	2.99206	4.16432	3.26734	3.24482	3.51884	3.21638	2.83972	5.19519	4.62329	5.5647	5.70459	5.54268
4409.01	3.0742	2.82424	2.68915	2.51571	2.42656	2.45876	2.44987	2.98257	4.14819	3.23626	3.26841	3.51146	3.20027	2.83495	5.20938	4.63029	5.54048	5.67921	5.52608
4410.44	3.05545	2.81694	2.68061	2.51136	2.42141	2.45534	2.44999	2.97226	4.13483	3.21394	3.28469	3.48732	3.18526	2.81119	5.21521	4.63167	5.52037	5.65892	5.48876
4411.86	3.0474	2.80974	2.67699	2.50964	2.41388	2.45517	2.43859	2.96359	4.12773	3.19861	3.26674	3.46344	3.17084	2.78884	5.18745	4.61673	5.49974	5.64256	5.45556
4413.29	3.03767	2.80514	2.67375	2.50372	2.40676	2.45306	2.4207	2.96344	4.1196	3.18108	3.23632	3.44639	3.15717	2.77057	5.14929	4.596	5.47458	5.62248	5.44529
4414.72	3.03235	2.80211	2.66778	2.4918	2.3957	2.44695	2.40351	2.96616	4.10119	3.17496	3.21754	3.43003	3.14902	2.75125	5.13146	4.57848	5.46159	5.60351	5.44378
4416.15	3.03673	2.79867	2.66321	2.48565	2.38821	2.44173	2.37998	2.95896	4.07157	3.16973	3.19962	3.41378	3.13854	2.7485	5.11862	4.55199	5.45254	5.56997	5.4314
4417.58	3.04128	2.78723	2.65517	2.48436	2.3769	2.43628	2.36699	2.92826	4.05072	3.1656	3.1856	3.38336	3.12828	2.75676	5.11086	4.53478	5.4421	5.54664	5.40271
4419.01	3.03095	2.77137	2.64852	2.48398	2.36579	2.43064	2.36913	2.90139	4.03138	3.16129	3.17488	3.3695	3.11613	2.76025	5.09503	4.52352	5.42271	5.52425	5.37857
4420.43	3.00837	2.76458	2.63627	2.4703	2.36251	2.41576	2.3732	2.89831	4.01643	3.15546	3.16386	3.37606	3.10559	2.75138	5.07896	4.51327	5.40187	5.50463	5.34733
4421.86	2.99741	2.75906	2.61341	2.44261	2.36015	2.39206	2.3717	2.89815	4.01182	3.14035	3.14949	3.38166	3.09308	2.73918	5.06443	4.49449	5.38081	5.49148	5.31439
4423.28	2.99313	2.75385	2.60517	2.43053	2.35728	2.38515	2.36645	2.89053	4.00876	3.11724	3.13235	3.36856	3.07625	2.72528	5.04142	4.46628	5.35551	5.47693	5.29913
4424.71	2.98851	2.74352	2.60488	2.4314	2.34748	2.39288	2.36006	2.87053	3.99959	3.10411	3.12215	3.34018	3.06685	2.70373	5.02104	4.45773	5.33612	5.47321	5.28586
4426.14	2.973	2.72993	2.60487	2.43053	2.33765	2.39743	2.34534	2.85786	3.96851	3.09399	3.1151	3.325	3.05639	2.69104	4.9885	4.45459	5.30959	5.47172	5.27068
4427.56	2.95191	2.71309	2.59688	2.41744	2.32258	2.38189	2.33424	2.85925	3.94557	3.0863	3.10894	3.3134	3.0458	2.67454	4.96822	4.44801	5.29293	5.46702	5.24784
4428.99	2.94459	2.68914	2.58511	2.40064	2.30395	2.35791	2.3273	2.86253	3.93725	3.07373	3.09706	3.30447	3.03271	2.6647	4.9656	4.42954	5.28793	5.44741	5.23204
4430.41	2.93942	2.67957	2.57893	2.39252	2.29404	2.3441	2.31985	2.8563	3.93178	3.05785	3.08285	3.296	3.01703	2.66808	4.96246	4.40952	5.28297	5.42102	5.22776
4431.83	2.93507	2.68163	2.57043	2.3865	2.28239	2.33166	2.31489	2.83786	3.93346	3.0564	3.07599	3.28598	3.00956	2.67236	4.95474	4.40707	5.27901	5.40262	5.22454
4433.26	2.92729	2.68177	2.56613	2.38394	2.27958	2.32422	2.30878	2.82739	3.93657	3.06564	3.0717	3.28317	3.00854	2.67205	4.94151	4.4124	5.27199	5.38103	5.21109
4434.68	2.91749	2.67691	2.55731	2.38414	2.29307	2.3232	2.302	2.82776	3.93784	3.06977	3.06949	3.28356	3.00535	2.66707	4.92657	4.40498	5.2593	5.37277	5.18211
4436.1	2.90448	2.67287	2.5477	2.3841	2.3033	2.32376	2.29362	2.82838	3.93451	3.0643	3.0728	3.28182	2.99351	2.66259	4.89945	4.3646	5.2274	5.37243	5.16451
4437.53	2.88312	2.66652	2.53308	2.37856	2.2953	2.32184	2.28561	2.82022	3.92885	3.05772	3.07499	3.27067	2.98251	2.65897	4.87307	4.32835	5.1991	5.37175	5.15663
4438.95	2.87173	2.65116	2.50813	2.36839	2.28191	2.31678	2.27981	2.80602	3.91198	3.04022	3.0628	3.25867	2.98604	2.65465	4.85168	4.31409	5.19167	5.36615	5.14691
4440.37	2.86353	2.64019	2.49896	2.36432	2.27172	2.30951	2.27486	2.79671	3.88587	3.01426	3.0415	3.25319	2.99693	2.64326	4.82851	4.29855	5.18833	5.35463	5.1398
4441.79	2.85728	2.63633	2.498	2.36313	2.26329	2.29957	2.27124	2.7861	3.8668	3.00753	3.02805	3.2462	2.99136	2.62253	4.82793	4.2944	5.18008	5.34298	5.13357
4443.21	2.84959	2.6309	2.49913	2.36186	2.25693	2.29126	2.26809	2.77333	3.84155	3.01318	3.01783	3.23722	2.9582	2.61123	4.84267	4.2944	5.16071	5.32561	5.11902
4444.63	2.83809	2.6177	2.50204	2.35745	2.24579	2.28005	2.26497	2.75304	3.82159	3.016	3.00935	3.22104	2.93471	2.59996	4.84559	4.29103	5.14371	5.30281	5.08683
4446.05	2.83103	2.59696	2.5047	2.35102	2.23306	2.26691	2.25882	2.73283	3.81117	2.99484	2.99502	3.20717	2.93721	2.59105	4.81992	4.27285	5.11498	5.25603	5.0616
4447.47	2.82524	2.58492	2.50161	2.34077	2.23019	2.25983	2.25261	2.73474	3.80412	2.96524	2.97967	3.18251	2.94481	2.5816	4.79262	4.24992	5.08401	5.20928	5.05339
4448.89	2.82089	2.58366	2.48831	2.31959	2.22884	2.25598	2.24419	2.74959	3.79669	2.95121	2.97199	3.15129	2.93611	2.57004	4.78758	4.23674	5.07456	5.20078	5.0466
4450.31	2.81081	2.58434	2.48057	2.30963	2.21905	2.2538	2.22776	2.75026	3.78346	2.94116	2.96411	3.14745	2.91381	2.56632	4.78733	4.22583	5.06226	5.20034	5.03592
4451.73	2.80112	2.5821	2.48148	2.3157	2.19333	2.25041	2.21424	2.72586	3.77388	2.93751	2.95792	3.15445	2.90192	2.5676	4.77654	4.2217	5.05284	5.19555	5.02175
4453.15	2.7939	2.57836	2.4815	2.32174	2.17293	2.2473	2.19836	2.70228	3.75789	2.93364	2.95009	3.15719	2.90472	2.56839	4.738	4.21608	5.04142	5.18315	5.01286
4454.57	2.77595	2.56659	2.45811	2.3017	2.17035	2.23838	2.18688	2.68811	3.7431	2.92846	2.9451	3.14997	2.90871	2.56162	4.70692	4.21108	5.03208	5.17024	5.0131
4455.98	2.76775	2.54187	2.41766	2.26413	2.17127	2.22176	2.19314	2.67527	3.72527	2.92117	2.93012	3.14245	2.89514	2.55369	4.70243	4.20698	5.02132	5.14876	5.00798
4457.4	2.76644	2.52913	2.4024	2.2534	2.17324	2.21364	2.20641	2.67151	3.70348	2.9101	2.90577	3.13727	2.87096	2.54141	4.70022	4.19823	5.00609	5.12029	4.96423
4458.82	2.76453	2.52772	2.39859	2.26491	2.17511	2.21406	2.20754	2.66933	3.70139	2.90218	2.89832	3.12759	2.85964	2.51976	4.679	4.18432	4.9956	5.11289	4.90772
4460.23	2.75082	2.52599	2.39855	2.27364	2.17595	2.21544	2.1953	2.67012	3.71398	2.89687	2.90298	3.11664	2.85716	2.51563	4.63016	4.16306	4.98236	5.11937	4.88878
4461.65	2.72977	2.52513	2.39874	2.26712	2.17323	2.20965	2.18547	2.67582	3.7192	2.89054	2.90515	3.0973	2.8534	2.5256	4.60561	4.14221	4.96611	5.1141	4.88852
4463.06	2.71972	2.52229	2.39814	2.25629	2.16965	2.20014	2.17927	2.67844	3.70687	2.87454	2.8962	3.08074	2.84172	2.52811	4.60918	4.11303	4.92294	5.07754	4.88582
4464.48	2.71285	2.51458	2.40011	2.25277	2.15741	2.19304	2.17486	2.66086	3.69	2.85844	2.886	3.06774	2.82891	2.51032	4.61244	4.08924	4.88078	5.03953	4.87631
4465.89	2.70792	2.49199	2.40294	2.25017	2.13457	2.18567	2.16182	2.62901	3.66874	2.84984	2.87283	3.05744	2.81407	2.48875	4.60375	4.09177	4.87584	5.01914	4.8646
4467.31	2.70246	2.47777	2.40228	2.24496	2.12193	2.18062	2.13883	2.61365	3.63883	2.84163	2.85105	3.05241	2.79362	2.47676	4.58481	4.10205	4.87875	4.99885	4.85202
4468.72	2.69947	2.48352	2.39109	2.22651	2.116	2.17494	2.13136	2.61214	3.62181	2.83615	2.83944	3.04434	2.78501	2.46419	4.56877	4.09006	4.87282	4.99227	4.83651
4470.14	2.70108	2.48994	2.37875	2.21047	2.11199	2.16794	2.13703	2.61084	3.61497	2.83142	2.82569	3.04151	2.79015	2.45898	4.54804	4.05026	4.85635	4.99139	4.81812
4471.55	2.70159	2.48319	2.36324	2.20969	2.11735	2.15289	2.14037	2.60737	3.60964	2.82538	2.81394	3.03987	2.79332	2.46286	4.53191	4.02715	4.84845	4.98599	4.78478
4472.96	2.69967	2.46412	2.34371	2.21324	2.12547	2.13274	2.12683	2.60275	3.60349	2.81164	2.81291	3.03602	2.78912	2.46404	4.5174	4.02525	4.85174	4.96646	4.75808
4474.38	2.68675	2.45246	2.33598	2.21151	2.12024	2.12152	2.10537	2.59397	3.5977	2.79567	2.8161	3.01878	2.78313	2.44832	4.50032	4.01911	4.85187	4.94491	4.75356
4475.79	2.67423	2.44301	2.33152	2.20227	2.10542	2.1106	2.0944	2.58016	3.59163	2.78353	2.81222	2.99359	2.77072	2.4252	4.48964	4.00432	4.83211	4.93689	4.75415
4477.2	2.65045	2.43514	2.32757	2.19234	2.09674	2.10492	2.09003	2.57139	3.58117	2.76763	2.79651	2.98979	2.74626	2.41326	4.47844	3.97717	4.79311	4.93071	4.75403
4478.61	2.62052	2.43831	2.32322	2.17473	2.09342	2.11171	2.08943	2.56179	3.57411	2.76109	2.78699	2.99817	2.73405	2.39949	4.46836	3.96437	4.77275	4.92132	4.75386
4480.02	2.61332	2.44271	2.32012	2.15813	2.0889	2.12153	2.09459	2.55097	3.56438	2.76428	2.77777	2.99915	2.73307	2.39391	4.45736	3.96062	4.76042	4.89878	4.74356
4481.43	2.61133	2.4361	2.31114	2.15249	2.07723	2.1203	2.09933	2.54212	3.55463	2.76702	2.76824	2.98537	2.73246	2.40222	4.44866	3.95352	4.74914	4.87874	4.71657
4482.84	2.61119	2.41813	2.29108	2.14826	2.06195	2.10986	2.08939	2.5324	3.54831	2.76011	2.75991	2.97398	2.72674	2.40992	4.44215	3.94285	4.73993	4.87265	4.69476
4484.25	2.6146	2.40236	2.28303	2.14611	2.05969	2.10229	2.07102	2.52713	3.54115	2.74676	2.75016	2.97549	2.71725	2.40533	4.43589	3.93347	4.72929	4.86892	4.6823
4485.66	2.61663	2.38814	2.28526	2.13701	2.06618	2.09196	2.06286	2.52241	3.52792	2.73614	2.743	2.97757	2.70769	2.39712	4.43275	3.93346	4.72532	4.85796	4.67306
4487.07	2.60811	2.37431	2.28547	2.12979	2.0657	2.08415	2.05838	2.52005	3.50238	2.72299	2.73748	2.97107	2.69134	2.39269	4.43004	3.94235	4.72313	4.83948	4.6575
4488.48	2.59188	2.3693	2.28085	2.13617	2.04467	2.07743	2.05598	2.52055	3.48769	2.71381	2.73248	2.95438	2.6795	2.38495	4.4205	3.93767	4.71359	4.82558	4.62723
4489.89	2.5802	2.3671	2.27516	2.14584	2.02241	2.06974	2.05813	2.51834	3.48627	2.71346	2.72935	2.941	2.67418	2.37788	4.38542	3.9056	4.68256	4.81023	4.6141
4491.3	2.56651	2.3644	2.26932	2.13882	2.02513	2.06587	2.06145	2.50858	3.48603	2.71483	2.72688	2.92575	2.67006	2.36712	4.35256	3.87765	4.6532	4.79462	4.62765
4492.71	2.55894	2.35885	2.2627	2.11364	2.03866	2.06316	2.05267	2.49464	3.47839	2.70756	2.72629	2.90842	2.66294	2.3533	4.34302	3.86978	4.63714	4.77596	4.63972
4494.11	2.56962	2.35395	2.25924	2.09684	2.03758	2.05891	2.03256	2.48614	3.46469	2.69327	2.72807	2.89489	2.65229	2.34431	4.33274	3.86012	4.61805	4.75	4.62031
4495.52	2.58208	2.35049	2.25459	2.08854	2.017	2.044	2.02392	2.48222	3.45659	2.68275	2.72441	2.87369	2.64415	2.3358	4.3275	3.84977	4.61083	4.74092	4.58276
4496.93	2.57386	2.34585	2.25084	2.08477	2.00266	2.02999	2.02226	2.47912	3.44994	2.67046	2.70776	2.86723	2.63572	2.33168	4.32142	3.83624	4.60451	4.73749	4.56214
4498.33	2.5538	2.33729	2.24304	2.08577	2.00188	2.02961	2.02181	2.47472	3.44445	2.66287	2.69643	2.87329	2.62797	2.33108	4.31219	3.83008	4.5977	4.73083	4.55342
4499.74	2.53987	2.32262	2.23028	2.08758	2.00281	2.0349	2.01814	2.46993	3.43505	2.65713	2.69654	2.87632	2.6212	2.32964	4.29712	3.83378	4.58714	4.71955	4.54805
4501.14	2.52512	2.31412	2.22663	2.08519	2.00252	2.03465	2.0121	2.46285	3.42208	2.65028	2.69805	2.86883	2.61565	2.31866	4.28364	3.83523	4.57528	4.70959	4.53177
4502.55	2.51351	2.31269	2.22715	2.07697	2.00047	2.02733	2.00617	2.45016	3.40587	2.64566	2.69056	2.85921	2.61314	2.30428	4.27189	3.81471	4.56431	4.70453	4.51463
4503.95	2.50647	2.31199	2.22456	2.07226	1.99654	2.02223	1.99818	2.43723	3.38387	2.64106	2.67361	2.85292	2.61196	2.3031	4.2552	3.77829	4.55047	4.69923	4.50804
4505.36	2.49997	2.31318	2.20962	2.07595	1.98407	2.0173	1.99435	2.42457	3.37382	2.6381	2.66321	2.84441	2.6105	2.30659	4.24065	3.76994	4.54392	4.69123	4.5032
4506.76	2.49388	2.31575	2.19472	2.0795	1.97364	2.01265	1.99557	2.41546	3.36876	2.62752	2.65754	2.84075	2.60741	2.30749	4.21783	3.78558	4.53943	4.67905	4.48839
4508.17	2.48405	2.31311	2.1952	2.07239	1.96804	2.00995	1.99579	2.41055	3.36609	2.61877	2.65322	2.83733	2.6063	2.30175	4.20385	3.78958	4.53175	4.66169	4.44808
4509.57	2.48179	2.30534	2.20179	2.05971	1.96083	2.0066	1.99101	2.40687	3.362	2.61431	2.64986	2.83302	2.59785	2.29311	4.20178	3.76169	4.50442	4.62293	4.42245
4510.97	2.48482	2.29776	2.20188	2.05484	1.95821	2.00394	1.98411	2.40662	3.355	2.6092	2.64544	2.82178	2.58437	2.27665	4.19849	3.73151	4.47259	4.58241	4.43447
4512.37	2.48703	2.28786	2.19058	2.04854	1.95655	1.99041	1.97342	2.40799	3.34799	2.60516	2.62999	2.80423	2.57724	2.25521	4.19945	3.73264	4.47149	4.57755	4.4499
4513.78	2.48401	2.2765	2.17884	2.04408	1.95248	1.98156	1.95314	2.40693	3.33549	2.60034	2.5972	2.79909	2.56671	2.25309	4.20161	3.74567	4.48049	4.58505	4.44047
4515.18	2.47724	2.2642	2.16522	2.0439	1.94265	1.98361	1.9437	2.39812	3.32753	2.59852	2.5822	2.79465	2.55919	2.26349	4.18943	3.74805	4.47727	4.58418	4.41828
4516.58	2.47348	2.24778	2.15168	2.04196	1.93543	1.98574	1.94442	2.39148	3.31752	2.59669	2.59095	2.78617	2.54508	2.26831	4.15287	3.73434	4.45685	4.56828	4.4081
4517.98	2.46867	2.24514	2.14255	2.0285	1.93477	1.97461	1.94647	2.39136	3.30934	2.59173	2.60128	2.76547	2.53508	2.25708	4.12877	3.71706	4.44398	4.55543	4.40767
4519.38	2.4678	2.25198	2.13078	2.00464	1.93453	1.94893	1.94178	2.38897	3.30294	2.57868	2.59551	2.74727	2.5219	2.24586	4.13414	3.68745	4.44437	4.5511	4.40885
4520.78	2.46185	2.25529	2.1272	1.99478	1.92865	1.9357	1.93266	2.37472	3.29524	2.56247	2.58046	2.74688	2.50064	2.23936	4.14339	3.65288	4.44186	4.54535	4.39171
4522.18	2.45449	2.24582	2.12265	1.9937	1.91279	1.93001	1.92718	2.34607	3.28986	2.55379	2.57145	2.75033	2.49872	2.22637	4.12639	3.64365	4.41726	4.5373	4.36791
4523.58	2.44446	2.23246	2.11914	1.99259	1.9025	1.92719	1.9157	2.32941	3.27246	2.5431	2.56416	2.74282	2.51019	2.21738	4.08266	3.64448	4.37159	4.52742	4.35912
4524.98	2.42129	2.22974	2.12436	1.98623	1.90337	1.9308	1.90924	2.33196	3.25911	2.53513	2.55738	2.72281	2.5152	2.20373	4.06851	3.64452	4.35505	4.51637	4.35508
4526.38	2.41448	2.22891	2.13191	1.97754	1.90543	1.93726	1.90822	2.33451	3.23392	2.53231	2.54559	2.71206	2.50318	2.1994	4.0813	3.64287	4.36424	4.49806	4.34898
4527.78	2.40644	2.22257	2.12736	1.96971	1.90116	1.93534	1.9077	2.32712	3.21121	2.53118	2.53678	2.71662	2.48853	2.20715	4.08931	3.64191	4.37088	4.4805	4.3361
4529.18	2.3976	2.20318	2.10689	1.9561	1.89124	1.92159	1.90956	2.31595	3.21882	2.52903	2.54075	2.72061	2.47954	2.213	4.07777	3.62401	4.36915	4.46205	4.32687
4530.57	2.38735	2.18876	2.09051	1.94782	1.87771	1.91502	1.91313	2.31541	3.23922	2.52581	2.54911	2.71164	2.47014	2.20607	4.05901	3.59789	4.3605	4.44205	4.31649
4531.97	2.37838	2.19028	2.07819	1.94008	1.85864	1.91311	1.91225	2.32422	3.24572	2.52231	2.54868	2.69631	2.4662	2.19017	4.05161	3.59669	4.34269	4.43953	4.30577
4533.37	2.37638	2.19306	2.07147	1.93614	1.84785	1.91203	1.90231	2.32698	3.23387	2.51227	2.53105	2.69114	2.46892	2.17796	4.04213	3.60374	4.31808	4.44509	4.29577
4534.76	2.3729	2.18884	2.07719	1.9464	1.85463	1.90718	1.89464	2.31481	3.22227	2.50595	2.51846	2.68793	2.46883	2.15815	4.03514	3.60496	4.3096	4.44339	4.27662
4536.16	2.36915	2.17611	2.08809	1.96275	1.86475	1.89958	1.87946	2.29993	3.20026	2.4852	2.5062	2.68545	2.45547	2.15075	4.02449	3.59522	4.31317	4.42895	4.26645
4537.56	2.35526	2.16615	2.08829	1.96721	1.85784	1.9009	1.86306	2.28895	3.17962	2.46315	2.49514	2.67805	2.44149	2.1659	4.01515	3.58621	4.31457	4.41919	4.26298
4538.95	2.34615	2.1601	2.07441	1.95993	1.83952	1.90961	1.86167	2.27829	3.17179	2.46451	2.49169	2.668	2.43421	2.17971	4.0067	3.5756	4.30352	4.42078	4.25977
4540.35	2.34443	2.15699	2.06692	1.95322	1.83645	1.91085	1.86729	2.27466	3.1606	2.47366	2.48852	2.66169	2.42409	2.16938	3.99096	3.55945	4.28286	4.42189	4.24861
4541.74	2.34141	2.15757	2.06658	1.93815	1.84884	1.88925	1.86654	2.27698	3.1515	2.47269	2.48588	2.65209	2.41666	2.14472	3.97298	3.54671	4.25958	4.4032	4.23323
4543.14	2.3418	2.15806	2.06691	1.92493	1.85369	1.86948	1.85246	2.27491	3.13911	2.4504	2.46912	2.64505	2.4097	2.13453	3.94693	3.53207	4.22621	4.3611	4.22207
4544.53	2.34185	2.15361	2.06138	1.92684	1.84262	1.87239	1.8423	2.25927	3.13177	2.43537	2.45538	2.63479	2.40649	2.12801	3.93306	3.52027	4.20151	4.33369	4.20947
4545.92	2.33888	2.14024	2.05121	1.93355	1.8301	1.88093	1.84046	2.2423	3.12295	2.43977	2.44589	2.62848	2.4137	2.12154	3.93825	3.4956	4.17989	4.31834	4.20217
4547.32	2.31878	2.13203	2.04544	1.9326	1.8305	1.87945	1.84056	2.24095	3.11426	2.4476	2.43882	2.62737	2.42302	2.11263	3.94076	3.47419	4.16525	4.3038	4.19289
4548.71	2.3032	2.1309	2.0321	1.91473	1.83941	1.86181	1.83888	2.24792	3.10858	2.44224	2.43924	2.62318	2.41607	2.10305	3.93113	3.47594	4.17812	4.29521	4.18481
4550.1	2.3096	2.13002	2.02458	1.90337	1.83635	1.85055	1.83438	2.24688	3.09778	2.42559	2.44066	2.61158	2.39466	2.1025	3.92193	3.48032	4.19803	4.28807	4.15723
4551.5	2.31937	2.12478	2.02145	1.89859	1.81229	1.84419	1.82956	2.23411	3.09213	2.41428	2.43918	2.59563	2.38276	2.10562	3.90673	3.47163	4.20175	4.29594	4.12047
4552.89	2.31297	2.11466	2.01887	1.89571	1.79385	1.83893	1.81715	2.22654	3.08231	2.4055	2.43576	2.58973	2.3725	2.10504	3.87976	3.44689	4.19609	4.31751	4.11592
4554.28	2.28524	2.10785	2.01964	1.89416	1.79373	1.83304	1.80898	2.22862	3.07815	2.40177	2.43319	2.58795	2.36668	2.09663	3.86545	3.43353	4.1871	4.31892	4.13209
4555.67	2.26839	2.09756	2.02121	1.89053	1.79742	1.82302	1.80846	2.23075	3.08783	2.40252	2.43106	2.58543	2.3577	2.09088	3.86429	3.43396	4.16652	4.28268	4.1372
4557.06	2.26304	2.08888	2.0145	1.8874	1.79217	1.81767	1.80967	2.22263	3.09992	2.40465	2.42947	2.57822	2.34787	2.08938	3.86123	3.43458	4.14765	4.2523	4.11961
4558.45	2.25977	2.08124	1.98853	1.87902	1.77917	1.81216	1.80938	2.20649	3.09151	2.40008	2.41967	2.56925	2.35108	2.08588	3.85489	3.42104	4.12344	4.25296	4.10211
4559.84	2.25389	2.07385	1.97387	1.87206	1.77462	1.80767	1.80626	2.19838	3.06193	2.38536	2.39658	2.56201	2.36043	2.07827	3.84816	3.40095	4.09172	4.25868	4.08585
4561.23	2.24628	2.07602	1.97571	1.86487	1.78002	1.80163	1.80097	2.19553	3.04692	2.3811	2.38501	2.55138	2.35789	2.06606	3.83812	3.39544	4.09645	4.24922	4.06928
4562.62	2.244	2.08469	1.97862	1.85815	1.78308	1.79636	1.7828	2.19415	3.03141	2.38502	2.38317	2.54705	2.33642	2.06361	3.82253	3.39264	4.1274	4.22557	4.06853
4564.01	2.2394	2.08371	1.974	1.85727	1.77599	1.7979	1.77141	2.1947	3.02219	2.38542	2.38244	2.54301	2.32028	2.07013	3.81497	3.39079	4.13429	4.20783	4.07774
4565.4	2.23549	2.0687	1.96514	1.85813	1.7677	1.80139	1.77899	2.1959	3.03144	2.36898	2.38172	2.53667	2.32391	2.07498	3.80983	3.38999	4.09606	4.18785	4.07484
4566.78	2.22798	2.05908	1.96115	1.85111	1.7627	1.79368	1.78934	2.18399	3.04408	2.3486	2.38084	2.52581	2.33202	2.07512	3.80364	3.3869	4.06262	4.16763	4.04454
4568.17	2.22023	2.0595	1.96044	1.83476	1.75639	1.76831	1.78872	2.15882	3.03535	2.34228	2.37547	2.51468	2.32596	2.0746	3.80098	3.37701	4.04685	4.15676	4.01992
4569.56	2.21928	2.05775	1.96125	1.8257	1.75351	1.75494	1.78317	2.14773	3.00833	2.34067	2.36502	2.50735	2.30966	2.06705	3.8003	3.36671	4.02768	4.15045	3.99683
4570.95	2.22073	2.04262	1.95938	1.83019	1.75451	1.76651	1.77718	2.1491	2.99622	2.33467	2.35891	2.49753	2.30022	2.05047	3.78878	3.35923	4.01309	4.13951	3.97283
4572.33	2.21488	2.01557	1.95641	1.83641	1.7534	1.78171	1.76248	2.14985	2.99602	2.30834	2.35269	2.49587	2.28898	2.03695	3.76023	3.34689	3.99752	4.11758	3.96911
4573.72	2.19914	2.00719	1.95253	1.82759	1.74498	1.7858	1.75035	2.14684	2.99455	2.28916	2.34842	2.49989	2.28079	2.01854	3.74366	3.34105	3.99067	4.10529	3.97342
4575.11	2.18979	2.01743	1.94488	1.80647	1.73687	1.78612	1.73635	2.14303	2.96679	2.28809	2.33225	2.49825	2.27199	2.00697	3.74015	3.34218	3.99056	4.09851	3.97555
4576.49	2.19589	2.02071	1.93881	1.79853	1.73496	1.78127	1.72263	2.12956	2.93498	2.29174	2.3116	2.47778	2.26325	2.00415	3.73658	3.34164	3.99022	4.08907	3.96144
4577.88	2.2038	2.00786	1.92422	1.79626	1.73432	1.76184	1.71772	2.10608	2.93401	2.29245	2.3029	2.45424	2.25849	2.00094	3.72159	3.33493	3.97949	4.07941	3.95038
4579.26	2.1973	1.99526	1.91572	1.79442	1.72942	1.74883	1.71432	2.10029	2.94342	2.29047	2.29692	2.44984	2.25109	1.99995	3.70266	3.32616	3.96546	4.0701	3.94053
4580.65	2.18192	1.99216	1.90874	1.78373	1.71489	1.73722	1.71587	2.11301	2.94344	2.28832	2.29365	2.45018	2.24584	1.99903	3.69522	3.31486	3.96291	4.06077	3.92601
4582.03	2.17407	1.99248	1.90198	1.77164	1.70424	1.72673	1.72734	2.12072	2.93117	2.28042	2.29246	2.44838	2.24382	2.0014	3.68912	3.29833	3.96236	4.04827	3.911
4583.41	2.1668	1.98752	1.90191	1.76362	1.70545	1.72073	1.73534	2.11653	2.92347	2.27581	2.29286	2.44114	2.24241	2.00246	3.68402	3.28789	3.95979	4.04208	3.89193
4584.8	2.1614	1.97172	1.90293	1.75304	1.70892	1.71096	1.73097	2.11071	2.9223	2.28033	2.2851	2.43764	2.23639	2.00235	3.67559	3.27659	3.94863	4.04104	3.8787
4586.18	2.14902	1.96303	1.90181	1.75425	1.7086	1.71184	1.72286	2.1038	2.92061	2.28492	2.27548	2.44088	2.22946	1.99733	3.66629	3.26511	3.93537	4.03635	3.85782
4587.56	2.13817	1.96405	1.89559	1.76837	1.70629	1.72323	1.71533	2.09496	2.91256	2.27492	2.27494	2.4424	2.22323	1.98739	3.65598	3.25568	3.91143	4.01297	3.84229
4588.95	2.1406	1.96237	1.89239	1.7775	1.70651	1.73144	1.70414	2.0915	2.89777	2.25267	2.27499	2.43296	2.21386	1.97156	3.64271	3.24625	3.88057	3.98368	3.83392
4590.33	2.14603	1.95533	1.88932	1.77018	1.7071	1.73087	1.69571	2.08817	2.88727	2.23985	2.26745	2.4162	2.21076	1.94977	3.62621	3.24006	3.86076	3.96655	3.82762
4591.71	2.14575	1.94442	1.88505	1.76135	1.70357	1.72836	1.68358	2.08241	2.87194	2.22988	2.24292	2.40711	2.21084	1.9401	3.59958	3.23316	3.84307	3.9514	3.8215
4593.09	2.14	1.93862	1.87766	1.76051	1.68356	1.72542	1.67609	2.06455	2.86088	2.22085	2.22386	2.40229	2.20966	1.93806	3.56323	3.22677	3.8224	3.93376	3.8137
4594.47	2.13455	1.93207	1.86488	1.75662	1.66268	1.71822	1.67462	2.04474	2.85242	2.20938	2.2155	2.396	2.19906	1.94025	3.51789	3.2223	3.79391	3.90943	3.80235
4595.85	2.11944	1.92793	1.85684	1.7478	1.6559	1.71111	1.67741	2.03873	2.84193	2.19479	2.2126	2.3825	2.17911	1.9436	3.4643	3.22121	3.75275	3.87424	3.7856
4597.23	2.10349	1.92736	1.84536	1.72634	1.65503	1.69862	1.68366	2.0414	2.82665	2.17858	2.21031	2.35602	2.15377	1.94504	3.40318	3.22492	3.69408	3.82403	3.76159
4598.61	2.09567	1.92559	1.83879	1.71164	1.65468	1.69031	1.69259	2.04709	2.80382	2.16224	2.20378	2.31084	2.12703	1.9415	3.33528	3.23486	3.61307	3.75463	3.72846
4599.99	2.08784	1.91936	1.83401	1.70488	1.64957	1.6883	1.70341	2.05018	2.77072	2.14727	2.18817	2.24123	2.10286	1.92991	3.26133	3.25247	3.50489	3.66189	3.68436
4601.37	2.08288	1.90906	1.82799	1.70229	1.63444	1.68948	1.71534	2.04504	2.72459	2.13517	2.15863	2.14145	2.08521	1.90723	3.18205	3.27918	3.36473	3.54166	3.62744
4602.75	2.0738	1.90378	1.8196	1.70134	1.60403	1.69039	1.72759	2.02607	2.6627	2.12742	2.11035	2.00581	2.07805	1.8704	3.09817	3.31639	3.18777	3.3898	3.55586
4604.13	2.06538	1.90128	1.80768	1.69948	1.55309	1.68758	1.73938	1.98765	2.58232	2.1255	2.0385	1.8286	2.08532	1.81636	3.01043	3.36555	2.96923	3.20217	3.46778
4605.51	2.06098	1.89947	1.79111	1.69415	1.47639	1.67764	1.74993	1.9242	2.48072	2.13091	1.93826	1.60412	2.11096	1.74208	2.91954	3.42807	2.7043	2.97464	3.36135
4606.88	2.05931	1.8964	1.76875	1.68282	1.36869	1.65711	1.75846	1.83012	2.35519	2.14513	1.80483	1.32669	2.15893	1.64452	2.82625	3.50537	2.38821	2.7031	3.23474

## Sheet: Face 785 nm
481.391	15.6798	12.769	13.2986	12.5077	11.7215	11.0456	10.8033	10.6358	7.81621	7.9352	8.48714	7.99661	6.80701	7.41944	7.21588	7.27374	7.21446	6.81518	6.76718	6.77138
483.285	15.9243	13.0662	13.5616	12.735	12.0055	11.1833	10.8977	10.8689	8.02268	8.09355	8.70312	8.14651	7.00807	7.49427	7.38111	7.31611	7.30238	7.0199	6.88983	7.01081
485.178	16.1171	13.3079	13.7731	12.868	12.242	11.271	10.9667	11.0614	8.15319	8.19025	8.89187	8.29223	7.18172	7.55697	7.48254	7.31431	7.38569	7.20647	7.01782	7.17398
487.071	16.2274	13.4373	13.8804	12.9261	12.3709	11.3414	11.0141	11.1724	8.2272	8.2132	9.01947	8.42995	7.28869	7.59371	7.53673	7.29578	7.42793	7.33075	7.14471	7.28003
488.963	16.301	13.4983	13.9106	12.9598	12.4208	11.4031	11.051	11.2301	8.28701	8.2033	9.10091	8.55583	7.31243	7.60121	7.57739	7.27717	7.41565	7.3975	7.26403	7.34802
490.854	16.3711	13.5504	13.9253	12.9926	12.4531	11.4765	11.081	11.2758	8.34353	8.20151	9.16557	8.66604	7.29571	7.60193	7.61292	7.24923	7.39223	7.44409	7.36937	7.39694
492.745	16.4175	13.5968	13.9502	13.0231	12.4871	11.552	11.0654	11.3128	8.39315	8.19731	9.21768	8.75578	7.28865	7.59027	7.64037	7.21866	7.37718	7.48985	7.4539	7.43809
494.635	16.4406	13.6278	13.986	13.0446	12.5027	11.6012	11.009	11.325	8.42594	8.18046	9.24027	8.79466	7.30409	7.55826	7.65246	7.19358	7.35337	7.52006	7.50072	7.46683
496.525	16.4559	13.6422	14.0194	13.057	12.4941	11.563	10.9702	11.3111	8.4341	8.16313	9.23862	8.76736	7.31684	7.51914	7.64335	7.15556	7.32079	7.52767	7.50416	7.48275
498.414	16.4707	13.6471	14.0432	13.0246	12.4798	11.4683	10.9632	11.2846	8.38089	8.12452	9.23559	8.72696	7.30697	7.47536	7.58045	7.10614	7.26733	7.52505	7.4924	7.48403
500.303	16.4477	13.6045	14.0138	12.9615	12.4498	11.3968	10.9617	11.2309	8.2938	8.06764	9.18931	8.71564	7.25044	7.42293	7.48856	7.05214	7.18524	7.47347	7.48455	7.45231
502.191	16.4017	13.533	13.9477	12.9104	12.406	11.357	10.954	11.1644	8.22991	8.01514	9.10575	8.71852	7.16781	7.365	7.41921	6.98911	7.10273	7.38759	7.47265	7.40497
504.078	16.3852	13.491	13.8978	12.8731	12.3674	11.3254	10.9007	11.1221	8.19096	7.96441	9.03733	8.71815	7.09636	7.2931	7.37393	6.9295	7.03211	7.32419	7.45833	7.36739
505.965	16.3813	13.4825	13.853	12.8402	12.3318	11.3003	10.8131	11.106	8.15863	7.91851	8.97596	8.70154	7.04139	7.21124	7.33436	6.88504	6.96761	7.28502	7.42958	7.33352
507.851	16.3761	13.4839	13.8161	12.8144	12.2986	11.2797	10.7484	11.0964	8.13003	7.89078	8.91239	8.66271	6.99229	7.1386	7.29631	6.84802	6.91476	7.25092	7.3704	7.29999
509.737	16.3877	13.4856	13.8221	12.7948	12.2769	11.2593	10.7117	11.0811	8.09798	7.87573	8.8631	8.6345	6.94708	7.07276	7.2582	6.8113	6.87778	7.22006	7.31792	7.27078
511.622	16.4124	13.4637	13.8578	12.7796	12.2706	11.2336	10.6891	11.0399	8.06331	7.86523	8.82653	8.62943	6.90298	7.01335	7.21674	6.76873	6.84862	7.1961	7.29955	7.23988
513.506	16.4354	13.4293	13.8966	12.7672	12.2689	11.1905	10.6872	10.9878	8.02854	7.85617	8.79648	8.62683	6.86095	6.9738	7.16562	6.71662	6.81838	7.17343	7.29797	7.21327
515.39	16.4463	13.4093	13.9244	12.7521	12.2587	11.1453	10.704	10.9533	7.98251	7.84074	8.77208	8.62871	6.82328	6.95164	7.09504	6.67273	6.76744	7.14103	7.29669	7.19994
517.274	16.4273	13.3996	13.8922	12.7389	12.233	11.1244	10.7245	10.9293	7.93581	7.82525	8.7446	8.64027	6.78722	6.93602	7.02833	6.64961	6.7011	7.08823	7.28975	7.19587
519.156	16.4021	13.3968	13.83	12.7329	12.206	11.127	10.7363	10.9168	7.90663	7.82121	8.71795	8.65101	6.75549	6.92026	6.99661	6.63901	6.65994	7.03181	7.27354	7.19208
521.039	16.4075	13.4081	13.8018	12.7186	12.1948	11.1359	10.7029	10.9304	7.88616	7.83382	8.70207	8.65845	6.73415	6.89999	6.99745	6.63159	6.65871	6.99584	7.25432	7.18141
522.92	16.44	13.4297	13.8047	12.7056	12.1956	11.1365	10.6457	10.961	7.87018	7.84813	8.69373	8.65364	6.72419	6.87843	7.00417	6.62147	6.67225	6.97475	7.21924	7.16034
524.801	16.4788	13.4513	13.8151	12.7124	12.2019	11.1085	10.6235	10.9938	7.86059	7.84438	8.68747	8.63126	6.72024	6.86138	6.99288	6.60673	6.66953	6.95864	7.15991	7.13867
526.682	16.5096	13.4633	13.8236	12.7236	12.2113	11.0735	10.6223	11.0174	7.84252	7.80393	8.67994	8.61669	6.71632	6.85097	6.95002	6.59419	6.6221	6.94464	7.12303	7.12486
528.562	16.4974	13.4393	13.8228	12.7391	12.1983	11.0644	10.6244	10.9869	7.82518	7.76244	8.65017	8.62606	6.7021	6.84288	6.90909	6.57903	6.54778	6.91841	7.12884	7.11674
530.441	16.4752	13.4051	13.8241	12.7676	12.1834	11.0682	10.6379	10.9392	7.82525	7.7611	8.62089	8.6475	6.68652	6.83203	6.90685	6.54844	6.50592	6.89092	7.14727	7.1148
532.32	16.4954	13.4013	13.8412	12.7957	12.2022	11.0735	10.6486	10.9362	7.83923	7.78132	8.62789	8.66798	6.68347	6.80596	6.93174	6.52379	6.5044	6.88161	7.16545	7.11626
534.198	16.5328	13.4127	13.8617	12.8171	12.2364	11.0789	10.6523	10.9497	7.85194	7.80227	8.64865	8.6694	6.68525	6.77307	6.95693	6.5041	6.51435	6.88661	7.17334	7.10768
536.075	16.5659	13.4271	13.8813	12.8306	12.2656	11.0716	10.6557	10.9597	7.84899	7.81317	8.66263	8.64468	6.68271	6.75277	6.96295	6.46529	6.51538	6.89398	7.16269	7.10056
537.952	16.5929	13.4457	13.903	12.8301	12.2801	11.056	10.666	10.9688	7.81882	7.79887	8.66204	8.62648	6.67119	6.73187	6.9422	6.4326	6.50595	6.89507	7.14872	7.10829
539.829	16.6186	13.4656	13.9233	12.8249	12.2668	11.0421	10.677	10.9754	7.78552	7.77924	8.6316	8.621	6.64718	6.71009	6.91376	6.42551	6.49172	6.88252	7.13967	7.12619
541.705	16.6389	13.4818	13.9398	12.8275	12.2444	11.03	10.678	10.9805	7.77395	7.77683	8.59284	8.60966	6.62459	6.7009	6.89451	6.43474	6.47478	6.86427	7.13196	7.14257
543.58	16.6472	13.4892	13.9537	12.8421	12.239	11.0197	10.6646	10.9907	7.77184	7.78182	8.5754	8.6041	6.61996	6.73739	6.87165	6.43873	6.44013	6.84872	7.12756	7.14973
545.455	16.6468	13.4824	13.9772	12.8551	12.2571	11.0135	10.6456	11.0402	7.77206	7.78605	8.58027	8.61845	6.62994	6.78969	6.8517	6.42104	6.39402	6.81911	7.12657	7.1487
547.329	16.6443	13.4688	14.0015	12.8537	12.2773	11.0182	10.6323	11.0948	7.77787	7.78765	8.59116	8.647	6.63881	6.80271	6.84762	6.38498	6.36831	6.7879	7.12515	7.14641
549.202	16.647	13.4578	14.0175	12.8425	12.2774	11.0256	10.6191	11.1059	7.8049	7.79087	8.59562	8.67006	6.63293	6.7855	6.86014	6.35373	6.36056	6.77671	7.12294	7.14697
551.075	16.6726	13.449	14.0606	12.8313	12.2619	11.0269	10.6054	11.0861	7.82891	7.79271	8.6047	8.6719	6.61756	6.7586	6.87669	6.33008	6.35505	6.78841	7.12234	7.14784
552.948	16.7012	13.4406	14.1017	12.833	12.2433	11.0325	10.5958	11.062	7.8212	7.79104	8.61318	8.65728	6.60433	6.7315	6.89027	6.30169	6.34517	6.80598	7.12475	7.14676
554.819	16.707	13.4393	14.095	12.8671	12.2345	11.036	10.59	11.053	7.78296	7.79503	8.61096	8.64881	6.60174	6.68527	6.91613	6.28195	6.31674	6.81405	7.12556	7.14633
556.691	16.6921	13.4854	14.0328	12.8975	12.2529	11.0262	10.5841	11.0622	7.74482	7.80044	8.60264	8.6731	6.6031	6.63548	6.93413	6.26801	6.27854	6.81978	7.12643	7.15349
558.561	16.6715	13.5385	13.9644	12.8861	12.272	10.9992	10.5739	11.0726	7.7306	7.79907	8.59333	8.72692	6.60502	6.61003	6.91829	6.24973	6.2572	6.82213	7.13127	7.15841
560.432	16.658	13.5483	13.9371	12.8396	12.2585	10.9701	10.5586	11.0678	7.72504	7.78392	8.5848	8.75716	6.60591	6.5903	6.86582	6.2408	6.24721	6.81678	7.13352	7.15324
562.301	16.6498	13.5344	13.936	12.7919	12.2097	10.9491	10.5448	11.0515	7.72012	7.76548	8.56985	8.75512	6.60146	6.57168	6.81368	6.2268	6.23777	6.80663	7.13559	7.14372
564.17	16.6398	13.5156	13.9419	12.7628	12.1604	10.914	10.5391	11.0324	7.71165	7.75142	8.55299	8.75075	6.59218	6.55754	6.78964	6.19449	6.22669	6.7947	7.14278	7.13937
566.038	16.621	13.4985	13.9413	12.7243	12.1514	10.8811	10.5334	11.0149	7.69803	7.73274	8.53701	8.74249	6.57717	6.53388	6.77128	6.1824	6.20147	6.78221	7.14676	7.14943
567.906	16.5899	13.4664	13.9312	12.6935	12.2035	10.8653	10.5279	10.9887	7.68401	7.71441	8.50707	8.73063	6.54901	6.51111	6.7562	6.19722	6.17078	6.76548	7.14221	7.17269
569.774	16.5645	13.4345	13.9187	12.6897	12.2595	10.843	10.5194	10.9645	7.66296	7.69673	8.47817	8.71826	6.52168	6.50108	6.74053	6.21781	6.15467	6.74878	7.13057	7.18592
571.64	16.5587	13.4187	13.9035	12.705	12.2635	10.8273	10.4796	10.9544	7.61017	7.66659	8.46569	8.70331	6.5082	6.47698	6.71057	6.23794	6.13712	6.72905	7.11581	7.16437
573.506	16.5571	13.4071	13.8662	12.7225	12.2361	10.8324	10.4369	10.9536	7.56631	7.64418	8.45898	8.67945	6.49888	6.45461	6.68716	6.25105	6.12095	6.68085	7.09024	7.10687
575.372	16.56	13.4009	13.8348	12.7158	12.2101	10.846	10.4292	10.9571	7.55869	7.63748	8.45757	8.64783	6.49391	6.46093	6.68372	6.26058	6.13285	6.63819	7.05273	7.06078
577.237	16.5614	13.3911	13.8277	12.6647	12.1969	10.8625	10.4397	10.9572	7.55441	7.61747	8.46037	8.62535	6.48868	6.48697	6.68094	6.27916	6.18158	6.62623	7.02846	7.04544
579.101	16.5358	13.3432	13.8047	12.627	12.1553	10.8734	10.4553	10.9439	7.55626	7.60234	8.45649	8.61968	6.46404	6.51528	6.67977	6.31446	6.243	6.60485	7.01679	7.02897
580.965	16.515	13.304	13.789	12.6456	12.1234	10.8684	10.4718	10.9334	7.56962	7.60651	8.45097	8.62514	6.44449	6.53212	6.68327	6.35842	6.29089	6.59127	7.00472	7.02113
582.828	16.5327	13.3116	13.8032	12.6886	12.1351	10.8656	10.4968	10.9409	7.59077	7.61883	8.43969	8.63437	6.4505	6.54503	6.69214	6.3981	6.34384	6.60609	7.00347	7.02425
584.691	16.5785	13.3268	13.8278	12.7308	12.1594	10.8801	10.5262	10.9586	7.611	7.63502	8.40202	8.64868	6.46287	6.564	6.70432	6.44219	6.39757	6.63717	7.01103	7.02694
586.553	16.6221	13.3451	13.8549	12.7667	12.1849	10.9052	10.5647	10.978	7.62838	7.6616	8.37561	8.66794	6.47573	6.61119	6.72637	6.49376	6.42831	6.66979	7.01856	7.03378
588.415	16.6373	13.3722	13.8809	12.8198	12.2097	10.9398	10.6326	10.9947	7.65356	7.7114	8.40635	8.67771	6.49346	6.70627	6.77003	6.53258	6.44318	6.69477	7.02719	7.05407
590.276	16.6348	13.4169	13.9092	12.8673	12.244	10.9955	10.7004	11.0146	7.68189	7.75932	8.49575	8.67206	6.53167	6.79398	6.81403	6.56052	6.45709	6.71968	7.03539	7.09074
592.136	16.6443	13.4636	13.9411	12.9032	12.2782	11.0824	10.7408	11.0385	7.71575	7.79746	8.57814	8.66161	6.57597	6.82729	6.85715	6.58342	6.48837	6.7459	7.04225	7.1219
593.996	16.6946	13.5054	13.9888	12.9499	12.3116	11.1566	10.773	11.08	7.76267	7.84526	8.61768	8.66535	6.62331	6.84161	6.92081	6.59359	6.54657	6.77484	7.05211	7.14102
595.855	16.7763	13.5546	14.0655	12.9932	12.358	11.1944	10.8036	11.1534	7.80859	7.88572	8.66298	8.69498	6.68769	6.85329	6.97451	6.59214	6.6071	6.80708	7.07756	7.16275
597.714	16.8465	13.5995	14.137	13.0291	12.401	11.2259	10.844	11.216	7.84892	7.91052	8.70301	8.7387	6.74016	6.87548	7.00667	6.59019	6.64176	6.83858	7.11782	7.18537
599.572	16.8535	13.634	14.1756	13.0686	12.4321	11.2526	10.901	11.2349	7.89251	7.93139	8.72418	8.77114	6.75535	6.91134	7.03943	6.60403	6.65687	6.87622	7.15108	7.2155
601.43	16.8022	13.6696	14.1955	13.1046	12.4658	11.2809	10.9489	11.2329	7.93295	7.95171	8.73353	8.78672	6.74827	6.94197	7.06943	6.64032	6.66568	6.93155	7.17923	7.25651
603.287	16.7765	13.7065	14.2175	13.1404	12.5003	11.3162	10.9673	11.2385	7.97345	7.96068	8.74913	8.79702	6.74925	6.95201	7.08452	6.68155	6.67243	6.98048	7.20976	7.28765
605.143	16.8412	13.7537	14.2455	13.1813	12.5395	11.3461	10.97	11.2662	8.01817	7.94923	8.79242	8.80534	6.78237	6.9515	7.07794	6.69926	6.67512	6.9998	7.22583	7.29415
606.999	16.9535	13.8134	14.2619	13.2109	12.5857	11.3595	10.9735	11.2974	8.04918	7.94431	8.85699	8.80588	6.8314	6.95537	7.07013	6.68221	6.67843	6.99606	7.21068	7.28512
608.855	17.04	13.8578	14.2798	13.2011	12.6222	11.3638	10.9852	11.3252	8.04985	7.95487	8.90522	8.79843	6.86499	6.9657	7.07	6.65527	6.68578	6.99436	7.18002	7.28358
610.709	17.055	13.8613	14.2979	13.1586	12.6338	11.3771	10.9979	11.3341	8.03288	7.96561	8.91639	8.79776	6.85611	6.97181	7.07173	6.6359	6.69211	7.0043	7.17989	7.29974
612.564	17.0369	13.8394	14.3052	13.138	12.6295	11.4037	11.0099	11.3224	8.03059	7.97378	8.9105	8.80724	6.82	6.98067	7.07796	6.61168	6.69812	7.01176	7.21964	7.31827
614.417	17.0255	13.8301	14.3152	13.1527	12.6327	11.4329	11.0212	11.3193	8.05012	7.96488	8.89957	8.82244	6.79326	6.97193	7.08199	6.58669	6.69262	7.01929	7.26878	7.32094
616.27	17.0337	13.8528	14.3331	13.1734	12.6562	11.465	11.0317	11.3333	8.07323	7.9426	8.888	8.83656	6.79267	6.93733	7.08031	6.57344	6.66714	7.02595	7.28805	7.28776
618.123	17.0458	13.888	14.3543	13.1999	12.6857	11.4757	11.0414	11.3467	8.09933	7.93687	8.8735	8.83546	6.80059	6.92138	7.08324	6.56453	6.63908	7.02769	7.25075	7.23635
619.975	17.0716	13.9225	14.3831	13.2198	12.7078	11.4612	11.0292	11.3589	8.10689	7.95114	8.8615	8.82339	6.81014	6.92166	7.08542	6.55857	6.61174	7.02468	7.196	7.21034
621.826	17.1108	13.9457	14.4035	13.2281	12.6948	11.4572	10.9955	11.3492	8.09495	7.96654	8.85224	8.81323	6.80263	6.91124	7.07969	6.56251	6.5796	7.01236	7.18503	7.21189
623.677	17.1513	13.9584	14.4097	13.2337	12.655	11.4525	10.9757	11.3202	8.08907	7.9787	8.84463	8.79595	6.78208	6.90545	7.07192	6.57545	6.55753	6.99078	7.21397	7.21614
625.527	17.1857	13.9645	14.4265	13.2246	12.6332	11.4336	10.9746	11.3123	8.05079	7.97609	8.84319	8.77901	6.77957	6.89171	7.04599	6.58752	6.54208	6.96824	7.24726	7.22693
627.377	17.1812	13.9389	14.4395	13.2072	12.6291	11.4249	10.9738	11.3337	7.9863	7.96389	8.82566	8.79081	6.77507	6.86527	7.00893	6.58057	6.52572	6.93971	7.27179	7.24039
629.226	17.1449	13.8909	14.4369	13.2096	12.6234	11.4204	10.9698	11.3598	7.96598	7.95771	8.7946	8.83051	6.75463	6.85098	6.99275	6.54906	6.52319	6.90909	7.27843	7.254
631.075	17.1251	13.8718	14.4435	13.2254	12.627	11.4126	10.9486	11.3794	7.9821	7.95265	8.78786	8.87417	6.75215	6.85073	6.99596	6.52082	6.52301	6.89637	7.2813	7.26463
632.923	17.1077	13.8839	14.4511	13.243	12.6395	11.4114	10.9206	11.3873	7.99876	7.94602	8.811	8.89117	6.76558	6.85453	7.00198	6.50833	6.51456	6.90365	7.28576	7.25662
634.77	17.0817	13.9005	14.4525	13.2622	12.6549	11.4133	10.9135	11.388	8.01022	7.94727	8.83828	8.86245	6.77582	6.86206	7.00516	6.50017	6.51211	6.91581	7.27652	7.2418
636.617	17.0776	13.9138	14.4616	13.2439	12.6727	11.4176	10.9296	11.386	7.99646	7.95816	8.85189	8.82378	6.77974	6.86246	6.98805	6.49233	6.50499	6.92215	7.26417	7.24763
638.463	17.0962	13.889	14.4709	13.2116	12.688	11.429	10.951	11.3687	7.97536	7.97289	8.83062	8.81517	6.76028	6.85493	6.96618	6.4872	6.48925	6.90585	7.26891	7.26844
640.309	17.1226	13.8498	14.4772	13.2219	12.7017	11.4323	10.9634	11.3496	7.97807	7.98365	8.79565	8.83184	6.73142	6.84754	6.96738	6.48605	6.48349	6.88279	7.27996	7.28629
642.154	17.1507	13.8511	14.4877	13.2874	12.7183	11.4315	10.9698	11.3582	7.99958	7.97063	8.78327	8.85584	6.72403	6.83179	6.99011	6.4863	6.47717	6.88207	7.29223	7.29268
643.999	17.1818	13.8763	14.4908	13.3572	12.7419	11.4368	10.9747	11.3882	8.01935	7.94995	8.78658	8.86756	6.74677	6.81187	7.01433	6.48794	6.46647	6.89611	7.28864	7.27794
645.843	17.2078	13.9002	14.4861	13.3752	12.76	11.3986	10.978	11.4196	8.02203	7.94454	8.79271	8.84919	6.77635	6.80143	7.02199	6.49099	6.46546	6.90904	7.24302	7.26127
647.686	17.2136	13.9191	14.4824	13.3076	12.7532	11.3451	10.9821	11.4388	7.99161	7.93603	8.80087	8.83267	6.7881	6.79245	6.99377	6.49113	6.48257	6.91421	7.20293	7.26386
649.529	17.1697	13.9188	14.4717	13.2275	12.6902	11.33	10.9823	11.4138	7.95261	7.92574	8.79503	8.85065	6.77574	6.78252	6.95691	6.48735	6.50422	6.89437	7.20787	7.27602
651.372	17.1099	13.9096	14.4578	13.2076	12.6182	11.3262	10.9713	11.3724	7.9327	7.92508	8.78184	8.89487	6.75647	6.77624	6.94152	6.48195	6.50834	6.86695	7.2327	7.28665
653.214	17.0825	13.9098	14.4517	13.2058	12.6023	11.3229	10.9445	11.3592	7.92348	7.92537	8.77673	8.93311	6.74687	6.77963	6.93265	6.47626	6.50407	6.85976	7.25402	7.28632
655.055	17.0629	13.9162	14.4574	13.2021	12.6192	11.3291	10.9164	11.3692	7.91902	7.92522	8.77855	8.93984	6.73625	6.78753	6.925	6.47196	6.49947	6.8743	7.25658	7.25549
656.896	17.0451	13.9202	14.4631	13.1988	12.6359	11.3606	10.9076	11.3802	7.92121	7.92459	8.7807	8.91564	6.7225	6.79325	6.91993	6.47021	6.4946	6.89104	7.23362	7.22231
658.736	17.0424	13.9131	14.454	13.197	12.6358	11.3893	10.9381	11.3768	7.93517	7.91375	8.78182	8.89526	6.71056	6.80605	6.91093	6.47325	6.50399	6.893	7.21237	7.21524
660.575	17.0699	13.8731	14.4198	13.1932	12.627	11.3898	10.9723	11.3607	7.95058	7.90176	8.80148	8.89403	6.70425	6.82012	6.90314	6.49619	6.51884	6.88703	7.20948	7.22033
662.415	17.0978	13.8296	14.3828	13.1869	12.6176	11.3932	10.9658	11.3441	7.96009	7.90482	8.82173	8.8958	6.70136	6.82754	6.90694	6.53166	6.51695	6.87947	7.21491	7.22373
664.253	17.0977	13.8228	14.3727	13.1894	12.6179	11.3964	10.9279	11.3433	7.97486	7.9365	8.82018	8.89274	6.70558	6.84017	6.93219	6.54177	6.49438	6.87459	7.21747	7.21737
666.091	17.104	13.8667	14.4061	13.1959	12.6552	11.3938	10.8907	11.3823	7.98616	7.96356	8.81294	8.88375	6.7467	6.84959	6.95527	6.5189	6.46955	6.87939	7.20917	7.19903
667.928	17.1079	13.9162	14.4474	13.201	12.6916	11.4016	10.8869	11.4193	7.98585	7.95915	8.80305	8.87264	6.78963	6.83956	6.95948	6.48735	6.46349	6.88476	7.1921	7.18087
669.765	17.0933	13.9303	14.4635	13.2068	12.6894	11.4057	10.9233	11.4062	7.9809	7.94162	8.78787	8.86429	6.79666	6.80451	6.96177	6.47742	6.47123	6.8799	7.18215	7.18249
671.601	17.0776	13.931	14.4719	13.2134	12.678	11.3914	10.9569	11.348	7.97472	7.92587	8.76872	8.87204	6.78902	6.77219	6.95957	6.4998	6.48171	6.86651	7.19971	7.21993
673.437	17.0722	13.9285	14.4748	13.2237	12.6657	11.3668	10.9508	11.2931	7.96853	7.9227	8.75375	8.89903	6.77697	6.77371	6.95133	6.53266	6.49051	6.85555	7.24328	7.25282
675.272	17.0894	13.9293	14.4663	13.2423	12.6582	11.3483	10.932	11.2873	7.96108	7.92982	8.75532	8.9125	6.76187	6.80596	6.94555	6.54784	6.50497	6.85984	7.26887	7.25887
677.107	17.1311	13.9377	14.4415	13.2575	12.6648	11.3567	10.9191	11.3235	7.95553	7.93716	8.78215	8.90402	6.73812	6.83738	6.94366	6.54527	6.51995	6.8843	7.2634	7.26575
678.941	17.1603	13.9444	14.4176	13.2619	12.6709	11.3971	10.925	11.3552	7.9609	7.95171	8.80906	8.89296	6.71955	6.84252	6.95009	6.5403	6.52507	6.91025	7.25121	7.26768
680.774	17.1487	13.9431	14.4155	13.2631	12.6692	11.4315	10.9448	11.3589	7.98297	7.99271	8.82131	8.88373	6.72328	6.83509	6.96713	6.5354	6.52113	6.9263	7.24097	7.26272
682.607	17.1214	13.9407	14.4384	13.2664	12.6763	11.4352	10.963	11.3761	7.9995	8.0226	8.83963	8.88107	6.74927	6.82984	6.97997	6.52349	6.51745	6.94486	7.23019	7.26013
684.44	17.1	13.9399	14.4607	13.2693	12.6849	11.4287	10.9696	11.3933	8.00112	8.02672	8.85362	8.88508	6.77177	6.83722	6.97837	6.51321	6.52045	6.95713	7.21374	7.25678
686.272	17.1004	13.9373	14.4637	13.266	12.6831	11.4255	10.9722	11.4035	8.00379	8.03282	8.84734	8.89208	6.77472	6.85231	6.97083	6.52051	6.52587	6.95577	7.20501	7.25287
688.103	17.1174	13.9289	14.4614	13.2689	12.671	11.4186	10.9779	11.4209	8.00875	8.03873	8.82251	8.91152	6.77442	6.86704	6.96986	6.5393	6.53118	6.94958	7.21603	7.25297
689.934	17.1384	13.9294	14.4646	13.2838	12.6679	11.3943	10.9819	11.4353	8.01831	8.04111	8.80707	8.94534	6.77626	6.87317	6.97917	6.55749	6.53497	6.94888	7.24125	7.25572
691.764	17.1614	13.9482	14.4781	13.3023	12.6894	11.3835	10.9781	11.4319	8.03083	8.03988	8.81688	8.96723	6.78351	6.87174	6.99005	6.56765	6.53739	6.94761	7.26156	7.263
693.593	17.1916	13.9745	14.495	13.318	12.7247	11.3898	10.9818	11.4136	8.03943	8.04147	8.83514	8.96855	6.79276	6.87134	7.00395	6.56947	6.54109	6.9323	7.28652	7.27691
695.422	17.214	13.9998	14.5145	13.3212	12.7534	11.3902	11.007	11.4071	8.03591	8.04247	8.8533	8.96283	6.79841	6.8715	7.02561	6.57345	6.54352	6.92681	7.32404	7.29165
697.251	17.1988	14.0181	14.5485	13.3152	12.7594	11.3906	11.0435	11.4201	8.02427	8.03819	8.86295	8.96444	6.78235	6.86839	7.05232	6.57545	6.5438	6.94107	7.34501	7.30654
699.079	17.1534	14.0309	14.5966	13.3158	12.7524	11.3954	11.0709	11.4339	8.01827	8.03635	8.86652	8.97951	6.74649	6.86881	7.06921	6.56747	6.54794	6.959	7.34381	7.32281
700.906	17.1364	14.0408	14.6275	13.318	12.7517	11.4042	11.0693	11.4469	8.01711	8.02761	8.87441	9.0005	6.72921	6.86707	7.06052	6.56462	6.56007	6.97432	7.33526	7.33346
702.733	17.1726	14.026	14.5946	13.3153	12.7479	11.4151	11.0506	11.4567	8.01485	8.01278	8.88545	9.01635	6.74215	6.86013	7.03802	6.57012	6.57475	6.98511	7.32824	7.33097
704.559	17.2228	13.989	14.5205	13.3191	12.7336	11.4237	11.0416	11.4649	8.0176	8.01466	8.89341	9.01696	6.76305	6.85696	7.02866	6.57401	6.585	6.99371	7.32235	7.32012
706.385	17.2532	13.9738	14.4843	13.3224	12.7367	11.4315	11.0527	11.4766	8.02885	8.04267	8.90317	9.01027	6.78339	6.86187	7.03988	6.57811	6.57318	6.99979	7.31583	7.31424
708.21	17.2515	13.9874	14.4832	13.3224	12.7649	11.4449	11.0719	11.4806	8.04352	8.07939	8.92255	9.00614	6.80438	6.86964	7.05785	6.58523	6.54788	6.98288	7.31233	7.31296
710.035	17.2417	14.008	14.4835	13.3287	12.7989	11.474	11.0868	11.4765	8.05592	8.10611	8.9458	8.99364	6.82582	6.87393	7.0718	6.59229	6.53701	6.95271	7.30809	7.31304
711.859	17.2468	14.0293	14.5001	13.3384	12.823	11.5088	11.0822	11.4801	8.07387	8.12163	8.95891	8.97572	6.83952	6.8711	7.0692	6.59417	6.54419	6.94719	7.30405	7.32208
713.683	17.2345	14.0364	14.5465	13.3462	12.8178	11.5273	11.0673	11.4711	8.09491	8.13292	8.93487	8.97412	6.83166	6.8661	7.06184	6.59045	6.55784	6.97703	7.3078	7.34177
715.506	17.2086	14.0361	14.6003	13.3502	12.7967	11.493	11.0594	11.4538	8.10989	8.13859	8.8945	8.99132	6.81486	6.86597	7.06466	6.58485	6.56904	7.01513	7.32104	7.36364
717.328	17.2108	14.045	14.6263	13.3486	12.7849	11.4435	11.0558	11.4581	8.12682	8.12303	8.88042	9.00951	6.8127	6.87834	7.06094	6.58074	6.58716	7.03407	7.33557	7.37913
719.15	17.2329	14.0471	14.6098	13.348	12.7634	11.4383	11.0551	11.4903	8.14219	8.10009	8.88939	9.01127	6.81748	6.89308	7.05246	6.58758	6.60525	7.01521	7.34368	7.38724
720.971	17.2534	14.0414	14.579	13.3627	12.7376	11.4947	11.0625	11.5259	8.1474	8.09177	8.90171	8.99413	6.82148	6.89551	7.05423	6.60111	6.60576	6.98427	7.34543	7.39241
722.792	17.264	14.0427	14.5658	13.4193	12.7354	11.5574	11.0901	11.54	8.14803	8.09502	8.90772	8.98093	6.8264	6.8825	7.0713	6.60256	6.58834	6.97488	7.34769	7.39261
724.612	17.2632	14.0646	14.561	13.4774	12.779	11.5735	11.1144	11.5339	8.14564	8.09772	8.89955	8.97869	6.82444	6.86686	7.08601	6.59051	6.56611	6.98265	7.34595	7.37125
726.432	17.259	14.0907	14.5604	13.4919	12.8269	11.5557	11.1045	11.5227	8.13569	8.09327	8.88691	8.96947	6.81848	6.86441	7.07957	6.57114	6.55419	6.9955	7.32875	7.3462
728.251	17.2619	14.103	14.5707	13.4747	12.8287	11.5314	11.0594	11.5187	8.10828	8.08746	8.88246	8.96214	6.81406	6.88584	7.05027	6.5468	6.55912	7.00975	7.31447	7.3444
730.07	17.2874	14.1251	14.5978	13.4487	12.8016	11.5182	11.0127	11.5216	8.08103	8.08125	8.88538	8.97962	6.80083	6.90674	7.02166	6.5216	6.5643	7.03388	7.32609	7.367
731.888	17.3102	14.1398	14.6188	13.4224	12.771	11.5141	11.0011	11.5193	8.06876	8.07957	8.88576	9.02564	6.78506	6.90495	7.01393	6.49736	6.54976	7.05426	7.36167	7.38861
733.705	17.3011	14.1249	14.6104	13.3812	12.7593	11.5148	11.0311	11.505	8.05937	8.09662	8.8768	9.06031	6.78057	6.89942	7.02188	6.4706	6.51942	7.05523	7.38867	7.38755
735.522	17.2729	14.113	14.5898	13.3455	12.7943	11.5212	11.0606	11.5012	8.05127	8.10687	8.86941	9.06056	6.8004	6.88752	7.03143	6.43251	6.4855	7.04908	7.38885	7.36648
737.339	17.2439	14.1013	14.568	13.345	12.8393	11.5385	11.0565	11.4986	8.0529	8.09669	8.86185	9.04373	6.82035	6.86666	7.02934	6.3872	6.45668	7.0411	7.37552	7.34529
739.154	17.2439	14.0809	14.5568	13.3891	12.8638	11.5479	11.0424	11.4972	8.07591	8.09133	8.85462	9.02579	6.81908	6.8488	7.01172	6.35166	6.42845	7.03412	7.36485	7.34518
740.97	17.3132	14.0642	14.5724	13.4219	12.8962	11.5413	11.0214	11.538	8.08897	8.07766	8.86183	9.02193	6.81315	6.82733	6.99177	6.33402	6.39839	7.03017	7.36096	7.37579
742.785	17.3681	14.0547	14.5855	13.4132	12.9085	11.534	11	11.567	8.07588	8.05343	8.86451	9.03513	6.79996	6.7988	6.98077	6.31979	6.37183	7.02019	7.35474	7.4054
744.599	17.336	14.0619	14.5724	13.3965	12.8686	11.5108	10.9876	11.5451	8.05931	8.03939	8.84805	9.04127	6.77654	6.76973	6.97606	6.29375	6.35471	6.99744	7.34469	7.41911
746.412	17.2632	14.0932	14.5491	13.3661	12.7909	11.468	10.9669	11.5207	8.03753	8.02464	8.82829	9.02877	6.75214	6.73435	6.96658	6.26376	6.33306	6.96942	7.34169	7.44066
748.226	17.1917	14.1042	14.5184	13.3166	12.7149	11.4237	10.9301	11.4865	8.01199	7.99979	8.80702	9.00628	6.72817	6.69944	6.95254	6.23597	6.30821	6.94001	7.35462	7.44791
750.038	17.1576	14.0676	14.4877	13.2562	12.6877	11.378	10.891	11.4419	7.98736	7.96763	8.79174	8.98223	6.71374	6.67782	6.94295	6.22298	6.29368	6.91461	7.36212	7.4291
751.85	17.1585	14.0178	14.4677	13.2066	12.7125	11.3459	10.8509	11.4074	7.96117	7.93887	8.78835	8.97304	6.71525	6.6531	6.92372	6.23156	6.27633	6.89609	7.36225	7.40186
753.662	17.1599	13.9721	14.4459	13.212	12.7213	11.3344	10.8173	11.3731	7.93626	7.92284	8.77228	8.97603	6.70406	6.61628	6.89718	6.24084	6.25635	6.87649	7.36163	7.36944
755.473	17.1498	13.9486	14.427	13.2667	12.6868	11.3121	10.7949	11.3398	7.91614	7.91476	8.73932	8.95389	6.66943	6.57821	6.87545	6.23573	6.24241	6.85272	7.34178	7.33684
757.283	17.1427	13.9412	14.423	13.2818	12.6534	11.2824	10.7761	11.319	7.89525	7.90218	8.71278	8.91271	6.63484	6.54889	6.84728	6.22536	6.22906	6.82896	7.3007	7.3085
759.093	17.1196	13.9185	14.4089	13.2343	12.6168	11.2631	10.7754	11.3008	7.87612	7.89003	8.68527	8.88176	6.60383	6.53651	6.8083	6.21964	6.21403	6.80238	7.25347	7.28344
760.902	17.0787	13.8689	14.384	13.1789	12.5831	11.2377	10.7928	11.3071	7.86265	7.88576	8.67019	8.85541	6.57969	6.5366	6.76821	6.23864	6.2023	6.76703	7.21431	7.26423
762.711	17.038	13.8146	14.3632	13.1414	12.561	11.2189	10.8024	11.3406	7.85154	7.87787	8.67213	8.85051	6.56294	6.54027	6.73959	6.2795	6.19815	6.72683	7.20358	7.25142
764.519	17.002	13.769	14.3343	13.1459	12.5439	11.214	10.7985	11.3434	7.85087	7.86782	8.65844	8.86917	6.55183	6.55353	6.73853	6.30836	6.21233	6.696	7.21239	7.24019
766.327	16.9893	13.7443	14.3101	13.1669	12.5515	11.2079	10.7908	11.3096	7.85774	7.8617	8.61452	8.88766	6.5602	6.57076	6.75624	6.31633	6.23776	6.68741	7.21096	7.24473
768.134	16.9957	13.7354	14.3054	13.1656	12.5786	11.1991	10.7833	11.2753	7.85812	7.86163	8.56596	8.90695	6.58418	6.57484	6.77458	6.31607	6.25736	6.6973	7.20581	7.26389
769.94	16.9938	13.7296	14.3146	13.1459	12.5864	11.1911	10.7718	11.2518	7.85292	7.88156	8.54123	8.92602	6.5987	6.56657	6.8044	6.31769	6.28483	6.71554	7.2059	7.26797
771.747	16.992	13.7335	14.3471	13.1281	12.5691	11.1865	10.7615	11.2409	7.84736	7.90773	8.54488	8.9319	6.59626	6.56352	6.83693	6.31557	6.31648	6.74132	7.202	7.26522
773.552	16.9939	13.746	14.3835	13.1255	12.5498	11.2075	10.7634	11.2395	7.84461	7.92059	8.56288	8.93254	6.58933	6.58674	6.85094	6.30982	6.33568	6.7688	7.20665	7.27042
775.357	16.9854	13.7545	14.388	13.172	12.5449	11.2368	10.7868	11.2477	7.85894	7.94588	8.58773	8.93369	6.58906	6.68317	6.86387	6.31201	6.35349	6.78627	7.21656	7.27763
777.161	16.9866	13.7692	14.3622	13.2257	12.5645	11.2493	10.8152	11.2751	7.87866	7.97622	8.63645	8.93445	6.61126	6.78517	6.87794	6.33862	6.37247	6.79885	7.22471	7.29595
778.965	16.9982	13.7914	14.3361	13.229	12.5911	11.2634	10.8315	11.31	7.88917	7.99417	8.6918	8.9408	6.64273	6.80425	6.88813	6.3766	6.3907	6.80975	7.24705	7.31684
780.769	17.0055	13.8146	14.3379	13.1818	12.6034	11.2782	10.8535	11.3348	7.90312	8.02231	8.72301	8.94744	6.66379	6.76265	6.91249	6.3993	6.42021	6.81719	7.27035	7.32556
782.571	17.0018	13.8472	14.3959	13.135	12.6014	11.2883	10.8742	11.3652	7.91694	8.04981	8.74679	8.94706	6.69078	6.71989	6.93664	6.42145	6.45032	6.82649	7.2812	7.33652
784.374	16.9927	13.8788	14.4629	13.1281	12.5977	11.3107	10.8803	11.3943	7.92634	8.05174	8.76634	8.94371	6.71696	6.71984	6.9426	6.44761	6.46412	6.83623	7.29608	7.34972
786.175	16.9808	13.892	14.4763	13.1469	12.6018	11.3298	10.8736	11.4015	7.94527	8.01471	8.77587	8.94561	6.7252	6.74126	6.93815	6.46427	6.46279	6.84662	7.30903	7.35465
787.977	16.9505	13.8791	14.4228	13.167	12.6093	11.3235	10.8666	11.3707	7.96273	7.98113	8.78905	8.96512	6.71783	6.76357	6.93559	6.46964	6.46421	6.88027	7.30582	7.34759
789.777	16.9171	13.8625	14.3637	13.1793	12.6161	11.2891	10.8689	11.3385	7.96677	7.98764	8.80087	9.00718	6.70965	6.77616	6.94424	6.47436	6.48258	6.91496	7.28749	7.34107
791.577	16.8992	13.8629	14.3526	13.2019	12.6192	11.2647	10.8769	11.3377	7.96123	8.02017	8.80403	9.04025	6.71308	6.78941	6.96278	6.49455	6.50744	6.92653	7.27379	7.34312
793.377	16.8899	13.8679	14.3568	13.2193	12.6163	11.2907	10.8897	11.3397	7.95827	8.04899	8.80594	9.02392	6.72356	6.80328	6.98131	6.531	6.52953	6.93438	7.27847	7.34014
795.176	16.8852	13.8707	14.3664	13.2168	12.6173	11.3642	10.9138	11.3451	7.97754	8.05451	8.8066	8.95246	6.7353	6.82013	6.99739	6.56496	6.54099	6.9418	7.29616	7.33725
796.974	16.8872	13.8677	14.382	13.2024	12.6403	11.4237	10.9535	11.3628	8.02768	8.04886	8.80226	8.90142	6.74757	6.84381	7.02016	6.57669	6.54529	6.94653	7.31303	7.34323
798.772	16.9041	13.8604	14.4071	13.1994	12.6962	11.4324	10.9865	11.3944	8.06728	8.04594	8.79112	8.91042	6.76764	6.86594	7.04008	6.57189	6.55323	6.94747	7.32791	7.35984
800.57	16.9262	13.858	14.4359	13.2248	12.7437	11.4239	10.9894	11.4243	8.07577	8.04696	8.78605	8.94436	6.78647	6.88765	7.0498	6.56979	6.58398	6.95099	7.3496	7.37777
802.366	16.9437	13.8765	14.4638	13.2653	12.7441	11.4204	10.9715	11.4384	8.07774	8.0429	8.79706	8.9702	6.79256	6.91427	7.05424	6.58832	6.63159	6.96378	7.36638	7.39746
804.163	16.9584	13.9198	14.4906	13.2947	12.7127	11.4246	10.9688	11.4426	8.08296	8.04999	8.81726	8.96506	6.7875	6.93299	7.06559	6.62188	6.66311	6.98352	7.37892	7.43116
805.959	16.9762	13.9549	14.512	13.2905	12.6916	11.4228	11.0013	11.4491	8.09303	8.07589	8.83802	8.94099	6.78911	6.93845	7.09941	6.64551	6.67309	6.99984	7.39683	7.45935
807.754	17.0002	13.9513	14.5214	13.2677	12.7014	11.4263	11.0454	11.4556	8.1004	8.10796	8.8507	8.93561	6.80921	6.94094	7.14789	6.66258	6.679	7.00726	7.4111	7.46796
809.549	17.0246	13.9265	14.5197	13.2624	12.7193	11.4336	11.0735	11.4528	8.10745	8.13346	8.85558	8.97234	6.83701	6.95063	7.17785	6.68368	6.68754	7.01306	7.41567	7.46642
811.343	17.0452	13.9245	14.5188	13.2896	12.7398	11.4408	11.0744	11.4573	8.11854	8.15441	8.86006	9.02799	6.85938	6.98034	7.16499	6.7011	6.70996	7.02291	7.415	7.46942
813.136	17.0578	13.9741	14.519	13.3265	12.7605	11.4556	11.0664	11.4875	8.13359	8.17708	8.85762	9.0554	6.86353	7.01807	7.13474	6.71831	6.74028	7.04736	7.41702	7.47872
814.929	17.0661	14.0425	14.517	13.3535	12.7808	11.4923	11.0692	11.5314	8.14628	8.1939	8.84775	9.03768	6.85834	7.04125	7.12797	6.73706	6.76379	7.08173	7.41417	7.48567
816.722	17.0776	14.0815	14.5218	13.3742	12.7977	11.5383	11.1045	11.5593	8.14909	8.19885	8.85029	9.00967	6.86431	7.04698	7.14741	6.74977	6.77572	7.10715	7.40563	7.49703
818.514	17.0969	14.0593	14.54	13.3932	12.8073	11.5722	11.1491	11.5688	8.14936	8.19996	8.88011	9.00339	6.89878	7.04878	7.17161	6.75336	6.78613	7.13453	7.41181	7.5095
820.305	17.1189	14.014	14.5649	13.4073	12.8129	11.6078	11.1678	11.5743	8.1631	8.20953	8.91987	9.01544	6.94322	7.05574	7.19547	6.75526	6.80616	7.16563	7.43276	7.5184
822.096	17.1368	14.0018	14.585	13.4386	12.8222	11.6424	11.1547	11.5799	8.20719	8.22996	8.94347	9.02681	6.96787	7.05652	7.23302	6.767	6.83146	7.1794	7.4535	7.52629
823.887	17.1471	14.0541	14.5795	13.474	12.842	11.6531	11.1396	11.5901	8.25587	8.25174	8.95929	9.03416	6.9813	7.05837	7.26938	6.79563	6.85301	7.16288	7.46284	7.52254
825.677	17.1535	14.1252	14.5669	13.4862	12.8643	11.6146	11.1544	11.6029	8.27738	8.26606	8.97702	9.02737	6.99379	7.0737	7.27694	6.8285	6.86103	7.1403	7.45602	7.5116
827.466	17.158	14.1564	14.5794	13.4719	12.8759	11.5755	11.2118	11.6146	8.27559	8.27218	8.99368	9.01876	7.00092	7.09399	7.25003	6.84942	6.84838	7.14193	7.4485	7.50955
829.255	17.1416	14.1363	14.6215	13.4594	12.8698	11.5901	11.2718	11.6301	8.27107	8.27873	9.00198	9.02745	6.98799	7.1128	7.22388	6.86706	6.83455	7.1604	7.463	7.51956
831.043	17.1235	14.1088	14.6662	13.4721	12.8637	11.6496	11.3	11.6471	8.27488	8.28956	9.00912	9.05507	6.97158	7.12242	7.23107	6.88114	6.84298	7.18231	7.51107	7.53546
832.831	17.1349	14.1188	14.6885	13.5007	12.8783	11.7046	11.3154	11.661	8.27641	8.29373	9.02565	9.08437	6.97327	7.11256	7.26589	6.88896	6.87409	7.20302	7.55889	7.55673
834.618	17.1796	14.1707	14.6966	13.5251	12.911	11.7235	11.3241	11.6759	8.28197	8.29861	9.04937	9.09981	6.97895	7.10323	7.29852	6.90051	6.90325	7.23265	7.5759	7.60041
836.405	17.2262	14.22	14.7031	13.5349	12.9442	11.7329	11.331	11.6879	8.30323	8.31268	9.06961	9.10074	6.98731	7.11525	7.31327	6.91133	6.91431	7.26217	7.56973	7.6467
838.191	17.2501	14.223	14.718	13.5427	12.9608	11.7396	11.3412	11.6893	8.34176	8.33241	9.08025	9.10623	7.00748	7.14573	7.32982	6.9197	6.91993	7.28505	7.56396	7.67368
839.976	17.2742	14.1875	14.7444	13.5498	12.9592	11.7589	11.3477	11.6739	8.3702	8.34733	9.09465	9.13143	7.05146	7.17325	7.34406	6.93092	6.92374	7.3198	7.57539	7.69642
841.761	17.2947	14.1555	14.77	13.5664	12.9581	11.8029	11.3424	11.6603	8.37741	8.36542	9.1092	9.17207	7.09103	7.19143	7.35988	6.93677	6.92308	7.34805	7.60312	7.71755
843.546	17.3176	14.1649	14.7939	13.6019	12.9817	11.8313	11.3289	11.6794	8.38507	8.40665	9.12878	9.20798	7.11311	7.21528	7.3879	6.92091	6.91727	7.3517	7.62926	7.74173
845.33	17.3671	14.2071	14.8342	13.6266	13.0342	11.824	11.3253	11.7451	8.39084	8.43407	9.17138	9.23612	7.15038	7.23526	7.4085	6.88953	6.91507	7.34233	7.66278	7.78151
847.113	17.4008	14.2435	14.8632	13.6413	13.0755	11.8076	11.352	11.798	8.40918	8.43673	9.20634	9.26972	7.17855	7.24746	7.42065	6.86995	6.9301	7.33387	7.72535	7.81039
848.896	17.3906	14.2616	14.8628	13.671	13.0852	11.7977	11.3971	11.8009	8.44974	8.44041	9.22343	9.28952	7.18535	7.25594	7.43977	6.87256	6.95445	7.34516	7.76815	7.81651
850.679	17.3656	14.2889	14.8533	13.6917	13.0918	11.7963	11.4236	11.7905	8.47788	8.44486	9.2487	9.28624	7.19198	7.26097	7.45129	6.88611	6.96644	7.37829	7.77668	7.82417
852.461	17.345	14.3079	14.8457	13.7	13.0981	11.7944	11.4156	11.7855	8.47738	8.45249	9.26571	9.27328	7.1961	7.2636	7.44107	6.8981	6.97357	7.40304	7.78084	7.82415
854.242	17.3259	14.3095	14.8312	13.7067	13.1099	11.7981	11.3938	11.7843	8.46638	8.4602	9.24891	9.26708	7.18649	7.26343	7.41931	6.92132	6.98031	7.4154	7.77554	7.80575
856.023	17.2994	14.3051	14.8036	13.7053	13.1256	11.8265	11.3787	11.7753	8.46229	8.45934	9.20445	9.27459	7.16488	7.25921	7.41093	6.94993	6.97725	7.43298	7.74196	7.77389
857.803	17.2871	14.3022	14.7898	13.676	13.1313	11.8643	11.3729	11.7711	8.46716	8.4416	9.17098	9.28498	7.15417	7.24935	7.41285	6.95888	6.9658	7.44233	7.68662	7.74851
859.583	17.3088	14.3046	14.8007	13.6298	13.1075	11.8731	11.3657	11.7692	8.46854	8.41444	9.15739	9.28221	7.15481	7.23513	7.41127	6.92005	6.95127	7.43097	7.66115	7.73288
861.362	17.343	14.3051	14.8168	13.5974	13.0674	11.8376	11.3465	11.7614	8.45573	8.38989	9.14756	9.24732	7.15302	7.21657	7.40523	6.86169	6.93528	7.40664	7.66857	7.71697
863.141	17.3516	14.2943	14.8189	13.5743	13.0433	11.7921	11.2984	11.7499	8.41002	8.36492	9.13853	9.19972	7.14693	7.18159	7.38653	6.83201	6.90709	7.38472	7.6773	7.70607
864.919	17.2825	14.2444	14.783	13.5538	13.025	11.7673	11.2537	11.7225	8.3627	8.3406	9.11283	9.17805	7.1203	7.143	7.36383	6.81684	6.88056	7.34422	7.67987	7.69986
866.696	17.1883	14.1847	14.7374	13.5413	13.0073	11.7419	11.249	11.6902	8.35296	8.32388	9.08181	9.17687	7.08445	7.11722	7.34817	6.80535	6.87067	7.29527	7.67219	7.69383
868.474	17.1548	14.1676	14.7268	13.5395	13.0028	11.7194	11.2663	11.6757	8.36833	8.31715	9.07012	9.17532	7.06425	7.09719	7.33074	6.79323	6.8656	7.27141	7.66038	7.68516
870.25	17.1494	14.1911	14.7406	13.5385	13.0007	11.708	11.2835	11.6701	8.38488	8.31775	9.06704	9.16788	7.0561	7.08331	7.31233	6.76542	6.86383	7.26742	7.64746	7.66996
872.026	17.1474	14.2197	14.7565	13.5274	12.9976	11.6838	11.2799	11.6675	8.38819	8.32015	9.06758	9.14582	7.04763	7.07849	7.29187	6.73854	6.85885	7.2706	7.63025	7.65374
873.802	17.1537	14.2221	14.7593	13.5062	12.9966	11.6639	11.2456	11.6705	8.37889	8.3144	9.07488	9.1235	7.02939	7.08006	7.25423	6.72536	6.83594	7.27056	7.61271	7.64173
875.577	17.1722	14.1873	14.7304	13.4916	12.9954	11.6622	11.2133	11.6813	8.37057	8.30916	9.08164	9.10535	6.99278	7.08434	7.22571	6.70793	6.81151	7.23766	7.60055	7.62026
877.351	17.1891	14.1475	14.6995	13.4928	12.9933	11.6607	11.205	11.6898	8.36836	8.30313	9.08653	9.06877	6.96068	7.0934	7.22378	6.69196	6.789	7.203	7.59185	7.6017
879.125	17.1883	14.139	14.6934	13.4938	12.9893	11.6576	11.2034	11.683	8.3583	8.27651	9.08526	9.04036	6.95917	7.11145	7.22605	6.68072	6.75594	7.20172	7.58243	7.60362
880.898	17.168	14.1653	14.6824	13.4853	12.9788	11.6482	11.1986	11.6572	8.34472	8.25286	9.06127	9.03631	6.98412	7.11939	7.22843	6.66872	6.72729	7.21451	7.56739	7.61656
882.671	17.1459	14.1918	14.6685	13.4562	12.9651	11.6292	11.1768	11.6346	8.31979	8.2445	9.03323	9.02918	7.00563	7.09101	7.21658	6.66204	6.7173	7.224	7.54436	7.62762
884.444	17.1223	14.1823	14.6519	13.4086	12.9461	11.6125	11.1403	11.6264	8.27341	8.23628	9.00807	9.02771	6.99862	7.03154	7.17972	6.66954	6.72139	7.21733	7.52453	7.62156
886.215	17.0679	14.1375	14.6209	13.3707	12.9128	11.5892	11.1162	11.6112	8.23928	8.22506	8.96477	9.0403	6.97338	6.98746	7.15329	6.68371	6.72632	7.1962	7.51419	7.58775
887.987	17.0169	14.097	14.5936	13.3539	12.8815	11.5482	11.1175	11.5987	8.22499	8.19778	8.93406	9.05843	6.94944	6.97247	7.14419	6.68887	6.73754	7.17241	7.50744	7.56083
889.757	16.9858	14.0772	14.5771	13.3441	12.8512	11.5204	11.1267	11.5868	8.20961	8.15632	8.93202	9.06799	6.92778	6.96556	7.13024	6.66819	6.75196	7.14231	7.49983	7.56273
891.528	16.9558	14.056	14.5577	13.3372	12.8075	11.5101	11.1246	11.564	8.19959	8.13565	8.93434	9.05034	6.89496	6.96514	7.12166	6.63763	6.75123	7.09721	7.48253	7.56986
893.297	16.9386	14.0454	14.5413	13.3243	12.7782	11.5035	11.0956	11.5489	8.19506	8.15208	8.93356	9.00809	6.87466	6.97749	7.12368	6.62884	6.71633	7.0666	7.45726	7.57292
895.067	16.9314	14.0393	14.5266	13.3079	12.7733	11.5015	11.0613	11.5474	8.19319	8.18031	8.90988	8.97875	6.8773	6.99344	7.1302	6.63711	6.67264	7.07071	7.45	7.54407
896.835	16.9216	14.0263	14.5143	13.3011	12.7761	11.4928	11.0508	11.546	8.19378	8.19222	8.87012	8.96867	6.88654	6.993	7.13045	6.64958	6.65312	7.09251	7.46897	7.48024
898.603	16.9112	14.0177	14.5156	13.3098	12.7783	11.4831	11.0532	11.5392	8.19532	8.18494	8.85373	8.95794	6.88954	6.96769	7.1158	6.65975	6.6478	7.10721	7.4933	7.44593
900.371	16.9165	14.0217	14.5047	13.3247	12.7705	11.488	11.0601	11.5151	8.1962	8.17357	8.87614	8.95139	6.8762	6.9396	7.09971	6.66396	6.65093	7.11405	7.50305	7.47061
902.138	16.93	14.032	14.4803	13.33	12.7551	11.5049	11.068	11.482	8.19158	8.16234	8.90882	8.94827	6.85759	6.93251	7.09779	6.66555	6.66273	7.12199	7.48688	7.51378
903.904	16.9255	14.0363	14.4707	13.3019	12.7392	11.5185	11.0512	11.4589	8.16715	8.14161	8.91923	8.94609	6.85061	6.94571	7.10036	6.66835	6.67735	7.12833	7.46371	7.5369
905.671	16.8721	13.9845	14.445	13.2706	12.7163	11.5103	11.0313	11.4453	8.14225	8.1255	8.86639	8.94171	6.84806	6.95913	7.1033	6.67	6.68931	7.11781	7.45685	7.52018
907.436	16.8075	13.9153	14.4131	13.2668	12.6942	11.4628	11.0252	11.4368	8.13962	8.13068	8.79711	8.93059	6.84657	6.95139	7.10633	6.67049	6.6874	7.10139	7.46622	7.49056
909.201	16.7845	13.8949	14.4096	13.2666	12.6896	11.4232	11.005	11.4347	8.15081	8.14458	8.7802	8.92293	6.8508	6.91577	7.09977	6.67537	6.66341	7.09712	7.47742	7.4796
910.965	16.7876	13.8884	14.4198	13.268	12.7118	11.4306	10.9873	11.4425	8.16499	8.15935	8.80713	8.9259	6.8596	6.88691	7.09468	6.68951	6.64564	7.08348	7.48293	7.49129
912.729	16.797	13.8869	14.4351	13.2661	12.7382	11.4589	10.984	11.4512	8.17366	8.1716	8.83896	8.92342	6.86972	6.8889	7.10028	6.70224	6.6518	7.06883	7.48158	7.50801
914.493	16.7988	13.9037	14.4527	13.2397	12.7384	11.4846	10.9829	11.4481	8.17123	8.1809	8.84768	8.92255	6.87391	6.90396	7.10828	6.70168	6.66579	7.07121	7.4789	7.51526
916.256	16.7774	13.9451	14.4607	13.2238	12.6976	11.4913	10.9869	11.4269	8.16408	8.18774	8.84314	8.92887	6.85593	6.91974	7.11511	6.69233	6.67467	7.08721	7.47884	7.5109
918.018	16.7614	13.9822	14.4674	13.245	12.66	11.4834	11.0004	11.4093	8.15651	8.18598	8.83511	8.92478	6.84007	6.93409	7.11778	6.68695	6.67528	7.10482	7.48135	7.50896
919.78	16.7744	13.9778	14.4746	13.2845	12.6636	11.4759	11.0206	11.4181	8.14809	8.17074	8.82063	8.92368	6.8521	6.95278	7.11679	6.69147	6.67575	7.11663	7.48549	7.52165
921.541	16.7945	13.9268	14.4644	13.3098	12.6859	11.4721	11.0374	11.4475	8.14226	8.16477	8.78595	8.93541	6.88367	6.96667	7.1188	6.70039	6.67812	7.12866	7.48919	7.54191
923.302	16.8106	13.8893	14.4543	13.2926	12.7055	11.4657	11.0531	11.4711	8.14274	8.17991	8.76349	8.94844	6.91116	6.97958	7.12785	6.70841	6.6854	7.13844	7.48957	7.55793
925.062	16.8279	13.9035	14.4477	13.2511	12.7056	11.4643	11.0721	11.4694	8.14827	8.20162	8.78013	8.9589	6.92299	6.9953	7.14035	6.70506	6.69541	7.14155	7.48916	7.5623
926.822	16.8593	13.9349	14.4297	13.2376	12.694	11.4602	11.085	11.455	8.15273	8.21442	8.81726	8.96955	6.93264	7.00271	7.15172	6.69498	6.70404	7.13862	7.48635	7.56212
928.581	16.8828	13.961	14.4182	13.2875	12.69	11.4514	11.0818	11.4455	8.15365	8.20878	8.84431	8.9854	6.93969	6.99673	7.1598	6.69001	6.71129	7.13748	7.47979	7.56268
930.34	16.8988	13.9639	14.4238	13.361	12.7113	11.4599	11.0752	11.446	8.15438	8.19853	8.86183	8.99867	6.94089	6.98688	7.16579	6.68372	6.71911	7.14837	7.48287	7.57173
932.098	16.9187	13.9546	14.4376	13.3964	12.7468	11.5146	11.0816	11.4486	8.15791	8.20106	8.88486	9.01447	6.93793	6.98419	7.17065	6.67663	6.7291	7.16787	7.50555	7.58899
933.856	16.9274	13.9564	14.4502	13.3835	12.7706	11.5814	11.0837	11.4546	8.16694	8.21276	8.89419	9.03711	6.93818	6.98885	7.17765	6.67492	6.74224	7.18126	7.53897	7.59917
935.613	16.8817	13.955	14.4608	13.3601	12.7665	11.6013	11.082	11.4594	8.1783	8.22422	8.88757	9.04169	6.93501	6.99437	7.1825	6.67971	6.75456	7.18187	7.56283	7.58277
937.369	16.8102	13.9452	14.4686	13.3492	12.7534	11.5547	11.0834	11.4617	8.18738	8.22986	8.87567	9.00081	6.92905	6.997	7.17597	6.68336	6.75773	7.17738	7.56751	7.54981
939.125	16.7803	13.9462	14.4673	13.3411	12.7568	11.4996	11.0762	11.4628	8.19237	8.21154	8.86322	8.94085	6.93145	6.9989	7.15063	6.67415	6.74221	7.17608	7.56461	7.53196
940.881	16.7402	13.939	14.4354	13.3276	12.7686	11.4853	11.0669	11.4288	8.19398	8.18892	8.84099	8.91405	6.93523	6.99715	7.12363	6.64746	6.72477	7.17856	7.56213	7.53038
942.636	16.6954	13.9266	14.3954	13.3003	12.7776	11.4884	11.0572	11.3856	8.1925	8.18342	8.81879	8.91212	6.93289	6.98734	7.1086	6.62184	6.70859	7.18066	7.54694	7.52829
944.391	16.6966	13.9245	14.3792	13.2416	12.7782	11.488	11.0319	11.3778	8.1881	8.18137	8.81264	8.90954	6.91977	6.96862	7.09075	6.60459	6.67811	7.1776	7.52341	7.51696
946.145	16.7368	13.9162	14.362	13.1963	12.7481	11.4711	11.0071	11.3785	8.1833	8.17412	8.81001	8.89673	6.88408	6.94662	7.07179	6.58244	6.65461	7.15824	7.49922	7.46755
947.898	16.7756	13.9032	14.3481	13.1947	12.7087	11.4391	10.9891	11.3778	8.1783	8.1452	8.80647	8.85759	6.84948	6.9156	7.05442	6.56165	6.64928	7.13595	7.4484	7.40649
949.651	16.7693	13.8913	14.3514	13.2034	12.6804	11.4156	10.9671	11.3715	8.16913	8.08022	8.79867	8.8151	6.83893	6.86813	7.03448	6.54539	6.64917	7.11834	7.39543	7.3723
951.404	16.6985	13.8718	14.3613	13.2077	12.6389	11.4167	10.951	11.3394	8.15945	8.036	8.77515	8.79052	6.83213	6.83367	7.01633	6.52896	6.64105	7.07684	7.36327	7.34798
953.155	16.6289	13.8473	14.3662	13.1944	12.6064	11.4294	10.9545	11.308	8.14698	8.04075	8.75408	8.77391	6.8235	6.8205	6.99965	6.50974	6.61103	7.03848	7.32857	7.33196
954.907	16.6067	13.8157	14.3472	13.1654	12.6002	11.4289	10.9717	11.3011	8.12624	8.05593	8.74319	8.76138	6.8038	6.80967	6.97893	6.47777	6.57395	7.02153	7.30594	7.32772
956.658	16.5921	13.7721	14.2954	13.1425	12.5958	11.3956	10.9741	11.3042	8.1046	8.06042	8.72072	8.75372	6.7642	6.79806	6.95667	6.44202	6.55576	7.00086	7.30559	7.32214
958.408	16.5779	13.7387	14.2541	13.1349	12.5823	11.3466	10.9448	11.3031	8.06801	8.03101	8.69876	8.75113	6.73245	6.78687	6.92541	6.42162	6.55675	6.98318	7.30946	7.31611
960.158	16.5708	13.7377	14.2539	13.1301	12.5483	11.3184	10.9057	11.2877	8.0161	7.98071	8.68106	8.74649	6.72515	6.77739	6.88712	6.41785	6.55848	6.96558	7.30962	7.31331
961.907	16.5743	13.7562	14.2705	13.1157	12.5014	11.3233	10.8784	11.2639	7.98954	7.94912	8.65887	8.73405	6.72527	6.76545	6.8699	6.41751	6.53974	6.93993	7.29221	7.31342
963.656	16.5665	13.7595	14.272	13.0744	12.4686	11.3371	10.8353	11.2421	7.98835	7.94285	8.63783	8.71553	6.71945	6.74539	6.89719	6.40718	6.47238	6.92093	7.25542	7.30858
965.405	16.5556	13.74	14.2401	13.0238	12.4748	11.3368	10.7878	11.2171	7.98741	7.94046	8.62095	8.69635	6.69027	6.72412	6.93853	6.3826	6.40596	6.90628	7.22833	7.28406
967.152	16.5522	13.7177	14.1967	12.9915	12.4992	11.3112	10.7666	11.1883	7.97641	7.9291	8.60625	8.67675	6.64976	6.7076	6.94682	6.35885	6.38282	6.88849	7.21524	7.24163
968.9	16.5392	13.7017	14.1695	12.9596	12.5015	11.2811	10.7597	11.1715	7.94587	7.89533	8.59124	8.65706	6.62684	6.68448	6.92034	6.34629	6.37162	6.87242	7.20021	7.20877
970.646	16.4835	13.7023	14.1416	12.929	12.4773	11.2635	10.7504	11.1648	7.91361	7.85674	8.55466	8.644	6.61074	6.66133	6.88684	6.33113	6.36273	6.83696	7.18524	7.17736
972.393	16.4135	13.703	14.1118	12.9179	12.444	11.2457	10.7262	11.1597	7.89686	7.83093	8.50912	8.63352	6.59232	6.6472	6.8587	6.31911	6.34533	6.7932	7.16201	7.14109
974.138	16.3773	13.677	14.101	12.9249	12.409	11.2252	10.6844	11.1522	7.88544	7.80696	8.48161	8.62231	6.57522	6.63814	6.82111	6.30281	6.31227	6.76993	7.13616	7.1256
975.884	16.349	13.6063	14.1188	12.9268	12.3577	11.1967	10.6493	11.1366	7.8732	7.78698	8.45568	8.60352	6.53576	6.62404	6.78747	6.26955	6.28568	6.75949	7.11979	7.13754
977.628	16.3218	13.5331	14.1354	12.9013	12.3076	11.1477	10.6371	11.1194	7.86219	7.77696	8.43139	8.54329	6.49418	6.58814	6.7674	6.24666	6.26843	6.75091	7.10265	7.1545
979.372	16.3034	13.4994	14.1092	12.8486	12.282	11.1088	10.6372	11.1077	7.85854	7.77364	8.41892	8.47783	6.47806	6.52911	6.74298	6.24614	6.24762	6.73842	7.08586	7.14885
981.116	16.2835	13.475	14.0145	12.8035	12.2688	11.0893	10.6366	11.0962	7.84987	7.76981	8.41556	8.455	6.46944	6.49026	6.72401	6.25174	6.23488	6.71821	7.07777	7.08548
982.859	16.2669	13.4572	13.926	12.7797	12.2619	11.0628	10.6249	11.0853	7.81937	7.7542	8.41252	8.45926	6.46209	6.48551	6.71141	6.25145	6.23498	6.70027	7.07549	7.01592
984.602	16.2646	13.459	13.9098	12.7546	12.2551	11.0437	10.6077	11.0722	7.76874	7.72497	8.40398	8.46663	6.45142	6.48654	6.69275	6.25542	6.24014	6.69007	7.07225	6.99823
986.344	16.2797	13.4885	13.9316	12.7391	12.2411	11.0406	10.6002	11.0498	7.73516	7.70838	8.39402	8.46745	6.43189	6.48648	6.67935	6.26246	6.24114	6.67716	7.06861	7.00596
988.086	16.2865	13.5078	13.9523	12.7469	12.2329	11.0448	10.6104	11.0304	7.73475	7.7199	8.38245	8.46955	6.41545	6.48793	6.67395	6.25758	6.23571	6.66693	7.07422	7.02003
989.827	16.2719	13.4903	13.9517	12.7709	12.2421	11.0447	10.6248	11.0225	7.74479	7.74473	8.36319	8.46982	6.40691	6.49209	6.66897	6.22994	6.23134	6.66549	7.07429	7.03721
991.567	16.2545	13.4577	13.9472	12.7861	12.2613	11.0455	10.6284	11.0204	7.74682	7.76384	8.3363	8.46682	6.39865	6.49112	6.66618	6.1975	6.23543	6.67117	7.05424	7.06836
993.307	16.2432	13.4359	13.9455	12.8056	12.2762	11.0506	10.6269	11.021	7.72721	7.77586	8.32023	8.46576	6.39416	6.48868	6.67772	6.18032	6.24874	6.67813	7.02128	7.09275
995.047	16.2498	13.4365	13.9593	12.8344	12.2785	11.0491	10.6249	11.0319	7.70218	7.78794	8.32559	8.47189	6.40822	6.4878	6.69767	6.16997	6.25933	6.6817	7.00705	7.10695
996.786	16.2657	13.4462	13.9828	12.8449	12.2764	11.0384	10.6137	11.0502	7.69834	7.79828	8.34176	8.49775	6.43701	6.4924	6.70796	6.15986	6.2562	6.68371	7.03548	7.12865
998.524	16.2686	13.4539	13.9949	12.8347	12.2812	11.0268	10.5775	11.0565	7.7292	7.81135	8.35587	8.53661	6.45726	6.51439	6.72062	6.14357	6.24109	6.68817	7.08286	7.14387
1000.26	16.2272	13.4762	14.0001	12.8226	12.3144	11.0263	10.5441	11.0509	7.76324	7.82095	8.36532	8.55271	6.49936	6.53422	6.73393	6.11959	6.22691	6.69857	7.10279	7.15181
1002	16.1678	13.5024	14.0026	12.8198	12.3528	11.0483	10.545	11.0419	7.76647	7.81441	8.37092	8.53077	6.54814	6.53651	6.73323	6.10429	6.21554	6.7079	7.08989	7.15818
1003.74	16.1339	13.4978	13.9939	12.8148	12.3515	11.066	10.5777	11.0311	7.74067	7.78305	8.37005	8.49792	6.55391	6.53376	6.71369	6.11625	6.19675	6.70693	7.07442	7.15672
1005.47	16.0975	13.4211	13.9584	12.8059	12.273	11.053	10.5971	11.0025	7.71625	7.74834	8.35899	8.48043	6.51802	6.52613	6.68717	6.14531	6.18001	6.70072	7.0683	7.10837
1007.21	16.0612	13.3336	13.9155	12.777	12.1845	11.015	10.558	10.9691	7.71761	7.72314	8.34106	8.46855	6.47212	6.4927	6.65723	6.15702	6.15903	6.69102	7.06743	7.03992
1008.94	16.0375	13.3051	13.8802	12.6977	12.1587	10.9798	10.4725	10.9478	7.7395	7.69339	8.31939	8.45494	6.43661	6.42188	6.6132	6.13543	6.13028	6.67435	7.06128	7.00792
1010.68	15.9956	13.3024	13.8131	12.6308	12.1579	10.9462	10.4186	10.923	7.75294	7.67162	8.29058	8.43837	6.38987	6.37454	6.57798	6.10376	6.11542	6.64527	7.0383	6.99115
1012.41	15.957	13.2987	13.7535	12.5994	12.1551	10.888	10.4116	10.8976	7.73499	7.64993	8.26358	8.40008	6.34743	6.36303	6.56295	6.08715	6.11895	6.62049	6.98181	6.9746
1014.15	15.9356	13.2732	13.7276	12.5586	12.1271	10.8419	10.4027	10.8614	7.69644	7.60706	8.23952	8.35989	6.31799	6.35181	6.55201	6.08953	6.12627	6.60926	6.92927	6.95553
1015.88	15.9033	13.2237	13.6919	12.5257	12.0677	10.8071	10.3909	10.7897	7.66803	7.57912	8.20469	8.33293	6.27944	6.34295	6.54004	6.09631	6.12445	6.59285	6.91228	6.92261
1017.61	15.8746	13.1826	13.6655	12.5003	12.0165	10.7656	10.3669	10.7367	7.65246	7.57058	8.17994	8.30336	6.25091	6.33732	6.5199	6.09348	6.1072	6.57512	6.91221	6.89209
1019.35	15.8487	13.1633	13.6585	12.4744	11.9819	10.7468	10.3376	10.7399	7.6324	7.56065	8.17572	8.28049	6.24123	6.33407	6.49606	6.07001	6.08688	6.55582	6.91035	6.88167
1021.08	15.8129	13.1462	13.6548	12.4594	11.9396	10.7786	10.3258	10.7661	7.61755	7.56107	8.17632	8.27184	6.23602	6.33438	6.48379	6.04572	6.07256	6.53291	6.88847	6.88694
1022.81	15.7883	13.1319	13.6498	12.4618	11.9133	10.8275	10.3601	10.7779	7.6034	7.58949	8.17455	8.27062	6.23316	6.35229	6.48848	6.04293	6.05864	6.51635	6.84891	6.89335
1024.54	15.7795	13.1299	13.65	12.4714	11.9225	10.8408	10.3946	10.7808	7.58966	7.62589	8.16691	8.26855	6.2491	6.37156	6.49665	6.05937	6.05082	6.51518	6.82753	6.90114
1026.27	15.7752	13.1364	13.6533	12.4765	11.9494	10.8222	10.3856	10.7879	7.58456	7.63543	8.15791	8.26505	6.28	6.37195	6.49978	6.07369	6.06004	6.52151	6.84964	6.91847
1028	15.7707	13.1354	13.6455	12.4833	11.9653	10.7975	10.3636	10.7808	7.58764	7.62643	8.15291	8.26558	6.29882	6.35962	6.51352	6.07653	6.0869	6.52136	6.89033	6.9258
1029.73	15.7666	13.1385	13.6166	12.4896	11.9832	10.7858	10.347	10.7534	7.58905	7.61527	8.152	8.26981	6.31434	6.34716	6.52738	6.08142	6.10452	6.51999	6.9045	6.92382
1031.46	15.7652	13.1429	13.5823	12.492	11.9988	10.799	10.3488	10.7235	7.5838	7.60874	8.14973	8.29085	6.32618	6.34681	6.52513	6.08238	6.10144	6.51863	6.8813	6.92255
1033.19	15.7694	13.1329	13.565	12.5009	11.9914	10.8053	10.3687	10.7117	7.58145	7.60921	8.14177	8.3166	6.31849	6.36108	6.51673	6.07283	6.09285	6.51057	6.85109	6.91891
1034.92	15.7912	13.1069	13.5804	12.5034	11.9709	10.7839	10.3757	10.7268	7.57957	7.61049	8.1341	8.32	6.28237	6.3697	6.50764	6.05746	6.08859	6.49205	6.83695	6.92237
1036.64	15.8079	13.0775	13.6023	12.4942	11.9512	10.7543	10.3599	10.7468	7.58464	7.61258	8.12671	8.30665	6.24687	6.35944	6.50351	6.04814	6.09976	6.47403	6.84367	6.92845
1038.37	15.7941	13.0594	13.6092	12.4891	11.9378	10.7335	10.3428	10.7532	7.60949	7.62199	8.11866	8.29193	6.24276	6.33896	6.50823	6.05323	6.11592	6.47462	6.85243	6.92442
1040.1	15.761	13.061	13.623	12.4782	11.9181	10.741	10.3291	10.7583	7.62106	7.62511	8.11307	8.28712	6.26214	6.32255	6.50814	6.06399	6.11719	6.50766	6.84772	6.9085
1041.82	15.731	13.0676	13.6311	12.4539	11.8996	10.7706	10.3242	10.7552	7.60872	7.61841	8.10618	8.30078	6.27891	6.31596	6.49999	6.06898	6.10601	6.53635	6.83278	6.89223
1043.55	15.7141	13.0802	13.6227	12.4227	11.9018	10.7859	10.3224	10.7403	7.59546	7.61213	8.10093	8.3087	6.27413	6.31179	6.49357	6.07004	6.09399	6.54196	6.81943	6.89124
1045.27	15.6957	13.1138	13.6091	12.4021	11.9323	10.7864	10.3176	10.7252	7.58397	7.60455	8.10637	8.28328	6.26006	6.30772	6.48763	6.071	6.08842	6.55187	6.81574	6.91417
1047	15.6802	13.1322	13.5945	12.4162	11.9526	10.7881	10.3185	10.7109	7.58605	7.5952	8.10938	8.22524	6.25349	6.31426	6.48835	6.0732	6.0942	6.55452	6.81763	6.93018
1048.72	15.6801	13.1137	13.5878	12.4466	11.9408	10.7787	10.3215	10.692	7.59569	7.58428	8.1093	8.18223	6.27598	6.32715	6.49334	6.07586	6.10051	6.54635	6.81853	6.91588
1050.44	15.6901	13.0788	13.585	12.4485	11.9176	10.754	10.3127	10.67	7.5969	7.57321	8.11388	8.18	6.31412	6.34046	6.48745	6.0785	6.09268	6.53648	6.82385	6.89078
1052.17	15.6838	13.049	13.5673	12.427	11.9035	10.7283	10.2877	10.6588	7.61049	7.56695	8.11689	8.19207	6.32655	6.36668	6.46397	6.07545	6.06754	6.52712	6.84117	6.87067
1053.89	15.662	13.0263	13.5366	12.4063	11.9006	10.7212	10.2664	10.6688	7.62848	7.56307	8.12186	8.20039	6.30454	6.38646	6.4392	6.06218	6.05368	6.52287	6.84794	6.86269
1055.61	15.6415	13.0065	13.5076	12.3959	11.8982	10.7409	10.2669	10.6851	7.62591	7.56104	8.12481	8.19547	6.27419	6.37871	6.43491	6.05671	6.06919	6.5209	6.83555	6.8594
1057.33	15.6314	12.9968	13.4927	12.3973	11.8918	10.7604	10.2855	10.688	7.61041	7.57366	8.11489	8.18414	6.2567	6.35029	6.46102	6.06272	6.09927	6.51687	6.81799	6.85546
1059.05	15.6362	13.0303	13.5249	12.3987	11.8951	10.7594	10.3041	10.6892	7.597	7.5861	8.09613	8.17153	6.25458	6.32852	6.48481	6.06833	6.1207	6.53158	6.80809	6.86085
1060.77	15.6441	13.0684	13.565	12.3915	11.9018	10.7491	10.3167	10.6913	7.5941	7.58458	8.07791	8.15977	6.25641	6.3281	6.47871	6.0737	6.12938	6.54865	6.8147	6.87198
1062.49	15.6408	13.0602	13.5575	12.38	11.8944	10.7384	10.3313	10.6881	7.59809	7.57834	8.06986	8.14784	6.25319	6.33764	6.45442	6.06988	6.13613	6.54118	6.82532	6.87325
1064.21	15.6231	13.0281	13.5066	12.3725	11.8592	10.7236	10.3354	10.6781	7.60165	7.57332	8.0809	8.13694	6.24893	6.34708	6.43672	6.06304	6.13766	6.51448	6.82682	6.87491
1065.93	15.6088	13.0036	13.4624	12.3713	11.8307	10.6981	10.311	10.67	7.59908	7.56336	8.09169	8.13274	6.24765	6.34539	6.43717	6.06686	6.13126	6.49126	6.82702	6.87592
1067.65	15.6048	13.0006	13.4599	12.373	11.8257	10.6815	10.2709	10.6722	7.59339	7.54205	8.08458	8.12921	6.25028	6.33772	6.44376	6.0738	6.1237	6.48529	6.82588	6.86719
1069.37	15.5922	12.9979	13.4723	12.3814	11.8083	10.6669	10.2524	10.6819	7.5922	7.53541	8.06787	8.11634	6.25216	6.33786	6.45406	6.07729	6.11948	6.48165	6.81746	6.84924
1071.08	15.5836	12.9977	13.4865	12.3883	11.802	10.6473	10.2562	10.6899	7.59084	7.5489	8.0521	8.09088	6.25262	6.3405	6.46751	6.0733	6.10929	6.47656	6.79957	6.83244
1072.8	15.5881	12.9927	13.477	12.387	11.8072	10.6474	10.2652	10.678	7.5848	7.56444	8.03966	8.07254	6.25068	6.34001	6.48251	6.0582	6.09941	6.46052	6.78601	6.82303
1074.52	15.5974	12.9773	13.4421	12.3817	11.8034	10.6658	10.2772	10.6489	7.58341	7.57407	8.02653	8.07347	6.24816	6.33611	6.48885	6.04823	6.09572	6.43421	6.78931	6.81508
1076.23	15.6029	12.9676	13.4234	12.3496	11.8081	10.6862	10.2959	10.6363	7.57815	7.57122	8.0191	8.08187	6.25023	6.32173	6.46875	6.04965	6.09289	6.41906	6.80603	6.81494
1077.95	15.571	12.9367	13.4179	12.3121	11.8281	10.7004	10.3131	10.649	7.57105	7.56412	8.01065	8.08927	6.26091	6.30614	6.44272	6.04778	6.0907	6.42198	6.82101	6.8234
1079.66	15.5227	12.8924	13.4115	12.3112	11.8502	10.7099	10.3184	10.6655	7.57359	7.55934	8.00137	8.08261	6.27306	6.30113	6.44659	6.04384	6.08962	6.43074	6.82192	6.83175
1081.38	15.5146	12.8855	13.4154	12.3395	11.8599	10.7185	10.3112	10.6689	7.58225	7.54705	8.00246	8.06561	6.27495	6.30774	6.48422	6.01086	6.08848	6.43665	6.81359	6.83966
1083.09	15.5345	12.9349	13.4302	12.3666	11.8448	10.7098	10.3027	10.6447	7.59071	7.53771	8.01173	8.05993	6.25072	6.31408	6.51824	5.95042	6.0817	6.45694	6.80502	6.83571
1084.8	15.5524	12.9925	13.4449	12.3724	11.8196	10.6557	10.287	10.6168	7.59565	7.53443	8.0205	8.06582	6.21919	6.31058	6.51765	5.92712	6.06232	6.4785	6.77812	6.82065
1086.51	15.5478	13.0061	13.4453	12.36	11.8034	10.6181	10.2557	10.6153	7.59632	7.51492	8.02003	8.06957	6.20485	6.29794	6.48879	5.94432	6.03756	6.4753	6.74549	6.80803
1088.23	15.5045	12.981	13.4178	12.3441	11.7941	10.6271	10.2417	10.6362	7.59096	7.50158	8.00187	8.06282	6.19865	6.28213	6.45856	5.96377	6.02609	6.44639	6.74111	6.78726
1089.94	15.4588	12.9516	13.3898	12.321	11.7842	10.6441	10.2427	10.6562	7.57618	7.4995	7.98706	8.03764	6.19486	6.2635	6.44188	5.96975	6.0321	6.42036	6.75319	6.76609
1091.65	15.441	12.9414	13.3801	12.2781	11.7581	10.6576	10.236	10.6467	7.55395	7.48662	7.99003	8.01387	6.19059	6.24266	6.43049	5.97059	6.04043	6.41933	6.76426	6.76211
1093.36	15.4301	12.9355	13.3648	12.2494	11.7035	10.6452	10.219	10.5986	7.53716	7.47666	7.99181	8.00846	6.18401	6.2248	6.42362	5.96514	6.03636	6.42837	6.7633	6.76734
1095.07	15.4184	12.9249	13.3533	12.2426	11.6645	10.6168	10.1684	10.5571	7.53124	7.46985	7.9949	8.00493	6.17861	6.20566	6.4215	5.94037	6.01709	6.43636	6.74165	6.77357
1096.78	15.3929	12.8922	13.3372	12.2369	11.6658	10.6047	10.1116	10.5419	7.52884	7.45912	7.99919	8.00258	6.16808	6.18637	6.42145	5.89006	5.997	6.43263	6.71411	6.77082
1098.49	15.3562	12.8377	13.3043	12.2221	11.6796	10.5792	10.0831	10.5272	7.52398	7.44441	7.99902	7.99863	6.14672	6.17035	6.41557	5.85349	5.98134	6.41997	6.68819	6.74939
1100.2	15.338	12.7968	13.2838	12.1785	11.6877	10.5403	10.0573	10.5132	7.51431	7.40816	7.99448	7.98426	6.13004	6.15112	6.39596	5.8519	5.96089	6.41233	6.65807	6.72866
1101.91	15.3357	12.7579	13.2618	12.1296	11.6715	10.5155	10.0348	10.4784	7.50162	7.36822	7.96044	7.96636	6.1118	6.13388	6.36904	5.85918	5.93634	6.38405	6.6397	6.70757
1103.61	15.3316	12.7165	13.2303	12.1089	11.6404	10.484	10.0132	10.4335	7.48642	7.35011	7.91032	7.93036	6.08787	6.12194	6.33847	5.85927	5.90062	6.33935	6.63257	6.66813
1105.32	15.3223	12.7013	13.212	12.1011	11.6124	10.46	9.97233	10.4158	7.46773	7.32796	7.88671	7.87381	6.06918	6.10868	6.28716	5.83487	5.85745	6.31892	6.62332	6.63348
1107.03	15.2676	12.6963	13.1897	12.0914	11.551	10.4594	9.94524	10.4125	7.44895	7.30866	7.85036	7.83806	6.0468	6.09465	6.23914	5.79752	5.83337	6.29708	6.61785	6.60856
1108.73	15.1966	12.6913	13.1611	12.0656	11.4857	10.465	9.9517	10.4058	7.42815	7.30512	7.81123	7.81278	6.02452	6.07157	6.2167	5.77313	5.82039	6.27351	6.60462	6.58637
1110.44	15.1553	12.6829	13.1318	12.0112	11.465	10.464	9.97127	10.3876	7.39701	7.30419	7.80246	7.78835	6.00962	6.03472	6.20383	5.75216	5.8047	6.26479	6.58368	6.57013
1112.15	15.1233	12.6469	13.0836	11.9723	11.4579	10.433	9.97294	10.3516	7.37442	7.30146	7.79438	7.78207	5.98588	6.00279	6.19257	5.73317	5.79097	6.25152	6.56497	6.53208
1113.85	15.0919	12.6068	13.0394	11.9726	11.4532	10.3696	9.93499	10.3215	7.36231	7.2889	7.78411	7.77958	5.96338	5.97095	6.17199	5.72645	5.76302	6.23613	6.5299	6.48829
1115.55	15.0531	12.5766	13.0199	11.9833	11.4465	10.3246	9.8822	10.3171	7.34198	7.2648	7.76701	7.77723	5.9509	5.9366	6.14001	5.71774	5.73545	6.21342	6.49379	6.47345
1117.26	15.0003	12.531	13.0086	11.9815	11.4314	10.2949	9.85051	10.3219	7.32289	7.24956	7.72719	7.77614	5.93792	5.92457	6.12228	5.70555	5.72172	6.16408	6.47796	6.47987
1118.96	14.9628	12.4946	13.001	11.9495	11.4154	10.2591	9.83322	10.3223	7.29007	7.24319	7.69328	7.76679	5.92891	5.94106	6.12996	5.69097	5.70439	6.12482	6.47006	6.49003
1120.66	14.9655	12.4829	12.9899	11.9084	11.3989	10.2443	9.81926	10.3007	7.24463	7.23371	7.67831	7.75752	5.92192	5.95833	6.14585	5.67311	5.68787	6.11045	6.46562	6.50196
1122.37	14.9899	12.4787	12.9742	11.889	11.3783	10.2458	9.80846	10.2596	7.22433	7.22084	7.66758	7.75478	5.91025	5.94827	6.14925	5.66009	5.67788	6.10018	6.45915	6.53474
1124.07	14.9996	12.4667	12.9644	11.8728	11.3608	10.2453	9.79191	10.224	7.22764	7.18636	7.66166	7.75247	5.89832	5.91284	6.12569	5.64666	5.67168	6.09628	6.44458	6.55759
1125.77	14.9486	12.4398	12.9497	11.8498	11.3353	10.233	9.77818	10.1903	7.23323	7.14671	7.64617	7.74684	5.87005	5.88652	6.09754	5.62308	5.6683	6.10235	6.43229	6.52858
1127.47	14.8727	12.4091	12.9289	11.8233	11.3049	10.2094	9.77016	10.1571	7.23197	7.12742	7.62531	7.7221	5.83192	5.8878	6.07925	5.60633	5.66149	6.11054	6.42275	6.459
1129.17	14.8388	12.3841	12.9139	11.7714	11.2877	10.1885	9.75984	10.1387	7.22545	7.11564	7.6155	7.67996	5.80902	5.89919	6.03986	5.59681	5.65038	6.10714	6.40947	6.40826
1130.87	14.8211	12.3229	12.8803	11.7272	11.2808	10.1751	9.75271	10.1261	7.21661	7.10441	7.58694	7.65103	5.79343	5.90547	6.00474	5.58826	5.63847	6.07721	6.39472	6.37668
1132.57	14.8055	12.2596	12.8393	11.7098	11.2757	10.1579	9.7413	10.1172	7.19314	7.0929	7.55344	7.62134	5.78073	5.88977	5.99273	5.57866	5.61023	6.04234	6.35131	6.34552
1134.27	14.7911	12.2427	12.8091	11.6869	11.2538	10.1381	9.7208	10.1088	7.13859	7.08075	7.5425	7.58653	5.7688	5.85559	5.97595	5.55472	5.57662	6.02602	6.29753	6.32696
1135.97	14.7513	12.2391	12.7691	11.6716	11.1733	10.1056	9.71256	10.0749	7.09934	7.06947	7.54159	7.56449	5.74033	5.82285	5.96176	5.53322	5.56129	6.01359	6.2766	6.312
1137.66	14.7143	12.2348	12.7347	11.661	11.1049	10.0607	9.71579	10.0454	7.09562	7.05226	7.53823	7.54139	5.71471	5.77915	5.9495	5.53138	5.5514	6.00505	6.27265	6.29903
1139.36	14.7011	12.2218	12.7157	11.6393	11.1021	10.0394	9.72066	10.0421	7.09877	7.02704	7.52142	7.52234	5.69816	5.73193	5.93289	5.53623	5.54317	5.99349	6.27087	6.29003
1141.06	14.6914	12.1992	12.6968	11.6191	11.1174	10.0471	9.72082	10.041	7.09514	7.01263	7.49332	7.51651	5.66821	5.71792	5.9223	5.54237	5.54089	5.96611	6.26089	6.26624
1142.75	14.6867	12.1815	12.689	11.5903	11.1302	10.0625	9.69974	10.0375	7.06866	7.00061	7.47464	7.51208	5.64783	5.73251	5.91085	5.5456	5.54223	5.94931	6.22565	6.24441
1144.45	14.6784	12.1577	12.7047	11.5595	11.1314	10.0707	9.67626	10.0174	7.03639	6.98531	7.45869	7.50653	5.651	5.75055	5.89844	5.54494	5.54368	5.9476	6.19515	6.24508
1146.14	14.6641	12.1239	12.7319	11.5586	11.1295	10.0546	9.66138	9.98635	7.03033	6.98494	7.43334	7.48862	5.66506	5.75764	5.89901	5.54607	5.5287	5.94511	6.19073	6.25893
1147.84	14.66	12.1138	12.7449	11.5877	11.1314	10.0353	9.63699	9.97544	7.0505	6.99689	7.41987	7.45112	5.67705	5.75643	5.90169	5.53521	5.49711	5.94482	6.19594	6.26981
1149.53	14.649	12.121	12.7145	11.6194	11.1255	10.0334	9.62416	9.98205	7.07302	7.00993	7.41597	7.42903	5.68147	5.75561	5.90477	5.50992	5.48885	5.92727	6.20142	6.267
1151.23	14.6367	12.1344	12.6712	11.6339	11.1157	10.0373	9.62807	9.99181	7.08299	7.01852	7.41583	7.44349	5.6831	5.75516	5.90704	5.50045	5.50362	5.90523	6.21237	6.25867
1152.92	14.6466	12.1594	12.6626	11.6338	11.1163	10.0416	9.6293	9.99901	7.08492	7.02491	7.42164	7.4726	5.68572	5.75037	5.89224	5.50433	5.51757	5.90814	6.23209	6.25757
1154.61	14.6653	12.2032	12.6829	11.6327	11.1185	10.0412	9.63396	9.99165	7.08408	7.03088	7.42918	7.48723	5.68275	5.74727	5.88368	5.51049	5.52957	5.92647	6.24673	6.25872
1156.31	14.686	12.245	12.7094	11.6293	11.1228	10.0353	9.63887	9.98447	7.076	7.03745	7.43764	7.47564	5.67923	5.7387	5.89588	5.51752	5.53803	5.94462	6.26589	6.25705
1158	14.702	12.2511	12.7246	11.6133	11.1297	10.0366	9.64318	9.99373	7.05537	7.04528	7.44639	7.45939	5.68459	5.72419	5.91292	5.52058	5.5451	5.95035	6.2842	6.25573
1159.69	14.6996	12.2038	12.7258	11.61	11.129	10.0432	9.6548	10.0121	7.0441	7.05118	7.45255	7.46155	5.70123	5.72159	5.92805	5.52447	5.54797	5.94027	6.27952	6.25716
1161.38	14.7005	12.1639	12.725	11.6233	11.1322	10.0486	9.66757	10.0326	7.04692	7.04321	7.45991	7.48219	5.71641	5.72866	5.93146	5.53142	5.54411	5.92971	6.22953	6.25974
1163.07	14.7134	12.1621	12.7262	11.6357	11.1302	10.0636	9.6786	10.0455	7.05219	7.02349	7.45572	7.50184	5.71343	5.73814	5.92451	5.53679	5.54514	5.91925	6.18147	6.2577
1164.76	14.7221	12.1628	12.7241	11.648	11.1064	10.085	9.68681	10.0485	7.06327	7.01809	7.43037	7.50432	5.6952	5.75148	5.92171	5.54032	5.55772	5.90003	6.18029	6.24103
1166.45	14.7332	12.1705	12.7276	11.6552	11.0986	10.104	9.68455	10.0554	7.07799	7.0279	7.42035	7.49331	5.68775	5.76998	5.92439	5.53663	5.57451	5.89607	6.20496	6.22646
1168.14	14.7334	12.1757	12.7286	11.6578	11.0992	10.1143	9.68325	10.0408	7.09262	7.03896	7.43447	7.47703	5.69643	5.78643	5.92623	5.52537	5.58338	5.89786	6.22874	6.22541
1169.83	14.723	12.1782	12.7242	11.6545	11.0942	10.1108	9.68994	10.0074	7.09533	7.04207	7.45168	7.45101	5.7066	5.78558	5.92185	5.51906	5.57105	5.89413	6.23469	6.22778
1171.51	14.7215	12.1916	12.7257	11.6337	11.0995	10.1075	9.69569	9.99801	7.06272	7.02823	7.45862	7.41619	5.70937	5.76372	5.90382	5.51634	5.54745	5.89769	6.23199	6.23517
1173.2	14.7089	12.211	12.7146	11.62	11.0934	10.1064	9.69265	10.0066	7.0322	7.01435	7.44094	7.40602	5.68649	5.75458	5.88693	5.51476	5.5319	5.90537	6.23077	6.24705
1174.89	14.6945	12.2323	12.7025	11.6319	11.0861	10.0929	9.66788	10.0177	7.03626	7.01415	7.41958	7.41883	5.65898	5.7653	5.88236	5.51451	5.5117	5.9137	6.21765	6.2576
1176.58	14.6948	12.2493	12.7053	11.6491	11.0958	10.0883	9.63129	10.0218	7.05492	7.01923	7.41688	7.43205	5.65631	5.77638	5.88095	5.50548	5.4909	5.91934	6.19533	6.26193
1178.26	14.6803	12.233	12.6906	11.6574	11.0936	10.0879	9.61136	10.0045	7.06893	7.02051	7.4119	7.43916	5.67238	5.78154	5.87958	5.49895	5.48829	5.90859	6.18662	6.25186
1179.95	14.6696	12.2084	12.6764	11.6335	11.0909	10.0691	9.59216	9.98955	7.06381	7.01087	7.40967	7.43796	5.68818	5.76174	5.87808	5.50399	5.49409	5.89802	6.17557	6.23422
1181.63	14.6752	12.1858	12.6666	11.5814	11.0916	10.0469	9.56954	9.98953	7.04727	6.99604	7.41302	7.43543	5.68144	5.72691	5.87788	5.51109	5.50069	5.89345	6.16416	6.21961
1183.32	14.6744	12.1425	12.633	11.553	11.0761	10.0151	9.57585	9.98301	7.0414	6.99064	7.41055	7.43611	5.64929	5.69929	5.87397	5.51585	5.50972	5.87535	6.16557	6.20071
1185	14.6719	12.1183	12.6128	11.5489	11.0678	9.98629	9.6121	9.98142	7.04726	6.99491	7.41238	7.43069	5.62542	5.67304	5.85498	5.51349	5.52051	5.86108	6.17804	6.18507
1186.68	14.6491	12.1198	12.6246	11.5472	11.0591	9.98476	9.64425	9.9848	7.0529	6.99873	7.41025	7.4243	5.61339	5.65605	5.83084	5.50509	5.52074	5.8572	6.19062	6.1812
1188.37	14.6071	12.1198	12.646	11.5553	11.0395	9.9877	9.64214	9.98595	7.05121	7.00161	7.39888	7.4146	5.59834	5.65637	5.82136	5.49921	5.50185	5.85416	6.18754	6.18134
1190.05	14.5894	12.1175	12.6588	11.563	11.0393	9.99034	9.61053	9.98994	7.02297	7.00808	7.3976	7.39148	5.59494	5.6638	5.81458	5.49293	5.47493	5.84948	6.16599	6.18413
1191.73	14.5957	12.1054	12.6346	11.572	11.056	9.99094	9.58857	9.98452	6.99286	7.01513	7.37289	7.37486	5.6154	5.67422	5.80938	5.48471	5.4615	5.83794	6.15481	6.1808
1193.41	14.6085	12.0898	12.5987	11.5827	11.0727	9.97191	9.58918	9.97583	6.98416	7.00984	7.33536	7.37007	5.64096	5.68813	5.81676	5.47992	5.46221	5.82679	6.17151	6.17006
1195.09	14.6208	12.0811	12.5905	11.5827	11.0789	9.95913	9.59226	9.9788	6.97956	6.98123	7.32287	7.36975	5.64645	5.704	5.83927	5.47348	5.46314	5.82786	6.19765	6.16831
1196.77	14.6269	12.069	12.5941	11.5821	11.066	9.97466	9.59394	9.98219	6.97964	6.96263	7.32112	7.37826	5.63503	5.70715	5.85827	5.46664	5.4595	5.84292	6.20899	6.18423
1198.45	14.6252	12.0622	12.5968	11.581	11.0479	10.0057	9.59394	9.98486	6.99912	6.9723	7.32005	7.3947	5.62429	5.68692	5.86958	5.46132	5.45352	5.85864	6.18717	6.20564
1200.13	14.6098	12.0706	12.5936	11.5676	11.0339	10.0209	9.59518	9.98954	7.04146	6.98847	7.31906	7.41038	5.63133	5.65895	5.88654	5.45455	5.44698	5.86813	6.15791	6.21665
1201.81	14.5774	12.0868	12.5859	11.5502	11.0152	10.0195	9.59703	9.99431	7.06204	6.9957	7.32233	7.41626	5.65557	5.6584	5.8924	5.44987	5.44721	5.88256	6.15602	6.21631
1203.49	14.5522	12.1025	12.5757	11.5255	11.0063	10.0176	9.59829	9.99627	7.03419	6.98602	7.32406	7.4109	5.67312	5.69917	5.86936	5.44688	5.45935	5.89023	6.18442	6.21215
1205.17	14.5376	12.126	12.5562	11.4985	11.0315	10.0095	9.5973	9.98721	6.98999	6.96893	7.32566	7.40353	5.66874	5.734	5.83168	5.44332	5.46844	5.88506	6.21173	6.20938
1206.85	14.517	12.1578	12.5279	11.4873	11.0784	9.99589	9.59219	9.96595	6.97587	6.95797	7.33101	7.40079	5.65584	5.72792	5.81662	5.44457	5.46872	5.87558	6.21054	6.20525
1208.52	14.4992	12.1655	12.5116	11.4831	11.0959	9.98044	9.58235	9.94508	6.99541	6.96459	7.33105	7.39784	5.64914	5.7009	5.83375	5.45265	5.46608	5.86615	6.19021	6.20318
1210.2	14.457	12.1391	12.5245	11.4749	11.0425	9.95968	9.57083	9.9174	7.01528	6.97249	7.3244	7.39494	5.6373	5.67646	5.85473	5.46126	5.46075	5.85759	6.17244	6.20846
1211.88	14.4032	12.1006	12.5439	11.4611	10.9678	9.92451	9.5517	9.88706	7.01597	6.96587	7.31496	7.37808	5.62111	5.66521	5.85556	5.46992	5.44811	5.84986	6.16175	6.21793
1213.55	14.3796	12.0688	12.5348	11.443	10.9468	9.89739	9.52263	9.87157	7.00632	6.95413	7.3038	7.34439	5.61786	5.66324	5.83968	5.48842	5.43418	5.84443	6.14795	6.22194
1215.23	14.3866	12.0261	12.4831	11.4263	10.992	9.89192	9.50622	9.87446	6.99275	6.94354	7.28542	7.32413	5.62971	5.66526	5.82582	5.5055	5.43339	5.84164	6.14039	6.21326
1216.9	14.398	11.9858	12.4308	11.4243	11.0389	9.89421	9.51039	9.87848	6.96921	6.93727	7.26806	7.32453	5.63767	5.66607	5.81893	5.50594	5.44434	5.83882	6.1388	6.19793
1218.58	14.3988	11.9708	12.422	11.443	11.0329	9.89413	9.51841	9.86581	6.93177	6.9351	7.26257	7.32896	5.61962	5.66465	5.80832	5.49518	5.452	5.83387	6.13852	6.18616
1220.25	14.4072	11.9787	12.4482	11.4529	11.0039	9.89485	9.51247	9.83979	6.91095	6.93432	7.26793	7.32561	5.57546	5.66546	5.80589	5.48814	5.45255	5.82993	6.14109	6.18111
1221.92	14.4101	11.9849	12.4688	11.4495	10.9803	9.89986	9.49306	9.82125	6.92008	6.94137	7.27347	7.32276	5.5438	5.67333	5.81895	5.49789	5.45389	5.82925	6.16609	6.18063
1223.6	14.3889	11.9878	12.4697	11.4475	10.9763	9.89643	9.47663	9.83442	6.93771	6.95674	7.2803	7.32185	5.56442	5.68216	5.83859	5.51932	5.45902	5.84334	6.1898	6.18762
1225.27	14.3516	12.0023	12.4728	11.4427	10.9787	9.88389	9.48268	9.87033	6.94687	6.96829	7.29471	7.32586	5.62043	5.696	5.85485	5.53276	5.48532	5.87334	6.1841	6.21699
1226.94	14.3305	12.0031	12.4683	11.4399	10.9765	9.86972	9.51746	9.8897	6.95748	6.98498	7.30057	7.34846	5.65564	5.72682	5.87569	5.54173	5.52838	5.89198	6.16269	6.24548
1228.61	14.3457	11.98	12.4487	11.4377	10.9697	9.86507	9.54785	9.90601	6.97063	7.00548	7.30429	7.37476	5.66861	5.74849	5.89631	5.55154	5.54924	5.90041	6.1481	6.27025
1230.28	14.374	11.952	12.4256	11.4376	10.965	9.88019	9.56342	9.92978	6.98248	7.02649	7.31009	7.4121	5.67973	5.74646	5.90393	5.54996	5.5499	5.90658	6.17451	6.31332
1231.95	14.3849	11.9429	12.4177	11.4544	10.9676	9.89545	9.5781	9.94135	7.00973	7.06237	7.30881	7.467	5.68601	5.73576	5.90267	5.53973	5.54493	5.9062	6.23875	6.33849
1233.62	14.384	11.9867	12.4545	11.4723	10.9935	9.91717	9.5871	9.94662	7.03172	7.08882	7.30327	7.49052	5.68909	5.73281	5.89925	5.52934	5.54527	5.91428	6.28234	6.34623
1235.29	14.3772	12.034	12.4973	11.4916	11.02	9.9666	9.602	9.95124	7.03834	7.09589	7.29695	7.48512	5.69406	5.7444	5.90583	5.53658	5.56628	5.92496	6.30672	6.35545
1236.96	14.3691	12.0352	12.507	11.5288	11.0246	9.99899	9.62324	9.96205	7.04749	7.10567	7.29913	7.47714	5.71402	5.76061	5.92889	5.56897	5.58125	5.93807	6.32811	6.36141
1238.63	14.3733	12.0268	12.5126	11.5434	11.0268	10.0102	9.63659	9.99019	7.05355	7.10831	7.32798	7.47188	5.76518	5.77805	5.9451	5.58961	5.60165	5.98131	6.33368	6.38551
1240.3	14.3796	12.0185	12.513	11.5208	11.0255	10.0235	9.6506	10.0081	7.05808	7.10347	7.352	7.47576	5.80328	5.80465	5.96133	5.58423	5.65	6.0139	6.32621	6.41378
1241.97	14.3908	12.0256	12.5132	11.4895	11.0335	10.035	9.65899	9.9903	7.06388	7.09944	7.36282	7.48098	5.7937	5.82601	5.98949	5.57117	5.67242	6.01099	6.316	6.41876
1243.63	14.4132	12.0509	12.5215	11.4762	11.0595	10.0533	9.65234	9.95331	7.06656	7.09632	7.38345	7.47997	5.76153	5.83517	6.00551	5.55956	5.64572	5.99952	6.31288	6.4149
1245.3	14.4177	12.0579	12.5208	11.4995	11.0664	10.0677	9.63909	9.93151	7.0718	7.09359	7.39467	7.47877	5.74202	5.84859	6.0151	5.54846	5.60402	5.99078	6.32075	6.40846
1246.97	14.4045	12.0506	12.5142	11.526	11.0357	10.0639	9.62448	9.94145	7.07682	7.09003	7.39224	7.47384	5.76986	5.85299	6.02058	5.53784	5.58882	6.00272	6.32934	6.3983
1248.63	14.3867	12.0462	12.5086	11.5241	10.9952	10.0464	9.61357	9.95915	7.07815	7.08958	7.38517	7.45712	5.81379	5.83139	6.01102	5.53751	5.60354	6.02397	6.33929	6.38515
1250.3	14.3638	12.0448	12.5011	11.5119	10.9797	10.0263	9.60752	9.96056	7.08551	7.10012	7.37746	7.43234	5.82137	5.79297	5.9845	5.54724	5.61857	6.03156	6.35686	6.37576
1251.96	14.3321	12.0643	12.5025	11.4989	11.0064	10.0052	9.60043	9.97435	7.0895	7.10608	7.36707	7.41883	5.8057	5.77502	5.96155	5.55453	5.6149	6.04816	6.36301	6.36737
1253.63	14.3026	12.0829	12.5071	11.482	11.0368	9.97959	9.59313	9.9885	7.07793	7.09545	7.3587	7.43741	5.78602	5.78849	5.95997	5.55013	5.59688	6.06281	6.36022	6.35745
1255.29	14.2873	12.0714	12.509	11.456	11.037	9.96375	9.5871	9.9761	7.05315	7.07688	7.36061	7.46592	5.76786	5.80706	5.97365	5.5372	5.58163	6.04893	6.35686	6.35143
1256.95	14.2827	12.037	12.5178	11.4355	11.0298	9.96551	9.58007	9.94221	7.03526	7.06543	7.37379	7.46592	5.74629	5.80108	5.97795	5.52486	5.58472	6.00538	6.34888	6.34862
1258.61	14.2765	12.0082	12.5193	11.4265	11.0166	9.97393	9.57366	9.9156	7.03433	7.07316	7.38001	7.43794	5.72994	5.76392	5.95919	5.51432	5.60185	5.97209	6.32587	6.34608
1260.28	14.2806	11.9963	12.4921	11.4208	10.987	9.97112	9.56706	9.91109	7.03777	7.08915	7.36627	7.40589	5.72691	5.72905	5.93371	5.50359	5.60589	5.98495	6.30198	6.34251
1261.94	14.3062	11.9831	12.4413	11.4117	10.9429	9.95067	9.55319	9.91097	7.03123	7.0886	7.3434	7.38523	5.73137	5.72403	5.92095	5.49701	5.59742	6.02366	6.29854	6.33993
1263.6	14.3098	11.9668	12.4017	11.398	10.9118	9.92785	9.52815	9.90544	7.01479	7.06315	7.32506	7.36377	5.73182	5.7413	5.91659	5.49487	5.58895	6.04	6.31763	6.33757
1265.26	14.2676	11.9465	12.3789	11.384	10.8873	9.91093	9.50547	9.875	7.00021	7.03421	7.30911	7.34777	5.72317	5.75019	5.91282	5.49419	5.57391	6.0123	6.33035	6.33844
1266.92	14.2126	11.9271	12.3612	11.3676	10.8635	9.89068	9.48746	9.83498	6.99721	7.01482	7.2927	7.35194	5.71108	5.73549	5.90796	5.48764	5.54814	5.97348	6.31869	6.34442
1268.58	14.1809	11.9128	12.3473	11.3404	10.8536	9.87473	9.46907	9.81689	7.0072	6.99044	7.28198	7.37202	5.70049	5.71235	5.89599	5.47142	5.5258	5.95864	6.2983	6.34626
1270.24	14.1412	11.8841	12.3373	11.3183	10.8604	9.87316	9.45628	9.81331	7.01101	6.96875	7.28177	7.37774	5.68458	5.7013	5.88334	5.45912	5.51593	5.95613	6.27918	6.3187
1271.9	14.1027	11.8529	12.3262	11.3129	10.8682	9.88264	9.44661	9.8108	6.99424	6.95804	7.28237	7.34338	5.6673	5.70092	5.86896	5.45407	5.50852	5.95395	6.24636	6.27378
1273.56	14.0837	11.8311	12.3021	11.315	10.863	9.88376	9.43846	9.8	6.96576	6.95383	7.27156	7.29393	5.651	5.70019	5.8476	5.44856	5.50244	5.94401	6.20809	6.25244
1275.22	14.0663	11.8023	12.2555	11.3139	10.8512	9.86393	9.43707	9.77858	6.94859	6.95027	7.24815	7.26872	5.62665	5.69636	5.83654	5.44424	5.493	5.92057	6.19487	6.2502
1276.87	14.0505	11.7826	12.2189	11.3063	10.8414	9.83757	9.44041	9.75944	6.95852	6.94294	7.22508	7.25662	5.6085	5.68386	5.83663	5.43253	5.47864	5.90391	6.20413	6.25088
1278.53	14.0364	11.7844	12.2048	11.2963	10.8334	9.81847	9.43806	9.74625	6.9793	6.93375	7.20673	7.24973	5.60333	5.66961	5.83771	5.41523	5.46963	5.90336	6.21453	6.24359
1280.19	14.0223	11.7952	12.1941	11.2743	10.8209	9.79214	9.41297	9.73223	6.97951	6.92254	7.18915	7.24392	5.59954	5.65765	5.83232	5.40409	5.45318	5.9052	6.20902	6.2196
1281.84	14.011	11.7971	12.1883	11.2197	10.8081	9.76702	9.3658	9.72183	6.94568	6.90012	7.17969	7.22492	5.59106	5.64458	5.79783	5.38906	5.43013	5.90348	6.19263	6.19528
1283.5	13.9941	11.7693	12.1739	11.1698	10.7803	9.76043	9.33821	9.70134	6.90743	6.87942	7.17968	7.20884	5.57836	5.63161	5.76249	5.37206	5.41488	5.87648	6.17848	6.18594
1285.15	13.9752	11.7324	12.1564	11.1676	10.7483	9.76636	9.34978	9.67593	6.88333	6.87186	7.18085	7.20677	5.56757	5.61537	5.75815	5.36787	5.39738	5.84069	6.15841	6.18462
1286.81	13.9669	11.7179	12.1539	11.1966	10.7378	9.76804	9.37471	9.66332	6.85552	6.86398	7.17447	7.20773	5.56439	5.59615	5.76775	5.37378	5.38101	5.82862	6.12345	6.18273
1288.46	13.9702	11.7107	12.1679	11.214	10.7404	9.75123	9.38297	9.65691	6.83869	6.86063	7.15662	7.20311	5.57174	5.5871	5.77366	5.37656	5.38833	5.82763	6.10659	6.17654
1290.11	13.9723	11.7045	12.1793	11.1974	10.7465	9.72229	9.37727	9.65302	6.84239	6.86378	7.13694	7.18338	5.57632	5.59301	5.76948	5.36745	5.41618	5.82788	6.1136	6.16902
1291.77	13.9632	11.7013	12.1743	11.1684	10.7529	9.70763	9.37139	9.6531	6.85339	6.86592	7.11847	7.16027	5.5645	5.60061	5.76271	5.3515	5.43086	5.82023	6.12321	6.16443
1293.42	13.9493	11.7027	12.1641	11.1518	10.7608	9.717	9.37095	9.65907	6.86445	6.86568	7.09029	7.15374	5.5426	5.59728	5.7574	5.34025	5.41199	5.79722	6.11924	6.16458
1295.07	13.9328	11.7026	12.1529	11.1568	10.7634	9.7305	9.38324	9.66431	6.88132	6.86342	7.06904	7.16554	5.5286	5.58694	5.75755	5.33231	5.37782	5.78161	6.10314	6.16544
1296.72	13.8964	11.6933	12.1339	11.1682	10.7397	9.7278	9.39167	9.66212	6.89969	6.85872	7.06	7.18013	5.5317	5.57951	5.75856	5.32373	5.36351	5.792	6.08842	6.16357
1298.38	13.8461	11.6774	12.1075	11.1772	10.6963	9.70914	9.3785	9.65482	6.89943	6.85029	7.05305	7.18686	5.54015	5.57053	5.75477	5.32199	5.37298	5.81318	6.08039	6.16258
1300.03	13.8277	11.665	12.0908	11.1868	10.673	9.69382	9.35104	9.64873	6.88193	6.84195	7.04745	7.19357	5.54172	5.55426	5.7508	5.3299	5.38522	5.81834	6.06441	6.16023
1301.68	13.8394	11.6505	12.0796	11.1899	10.6563	9.69256	9.33658	9.63152	6.86559	6.83496	7.03802	7.19551	5.51899	5.54617	5.74566	5.3364	5.38337	5.79667	6.0527	6.14664
1303.33	13.854	11.6362	12.0687	11.1749	10.6404	9.69828	9.32964	9.6114	6.85454	6.82348	7.02814	7.16059	5.49087	5.54453	5.73057	5.33204	5.36969	5.77053	6.05652	6.12187
1304.98	13.8535	11.6323	12.0587	11.1456	10.6379	9.70209	9.31815	9.60927	6.83402	6.8007	7.02718	7.09446	5.48415	5.53987	5.70165	5.32143	5.36149	5.76195	6.06706	6.10357
1306.62	13.8367	11.6425	12.0473	11.1244	10.6477	9.69485	9.30936	9.63184	6.82055	6.7837	7.0443	7.06394	5.48912	5.53468	5.68335	5.3148	5.37002	5.75934	6.07013	6.09161
1308.27	13.8167	11.6498	12.0373	11.1184	10.656	9.67972	9.29135	9.65233	6.81962	6.77699	7.05908	7.07565	5.49481	5.52861	5.68922	5.31425	5.38673	5.75948	6.06858	6.08153
1309.92	13.7964	11.637	12.0327	11.1151	10.6552	9.67348	9.27107	9.6414	6.81989	6.77049	7.0499	7.09638	5.49624	5.52347	5.70335	5.31507	5.38888	5.76759	6.06604	6.07657
1311.57	13.7674	11.6104	12.0333	11.1117	10.6526	9.68115	9.26644	9.60391	6.81886	6.76568	7.02487	7.10354	5.49664	5.52254	5.7075	5.31046	5.35966	5.783	6.05948	6.0772
1313.22	13.7484	11.5886	12.0338	11.1032	10.6457	9.6905	9.27491	9.57422	6.8128	6.75911	7.00968	7.09437	5.49576	5.52517	5.70104	5.29458	5.31814	5.78307	6.04489	6.07866
1314.86	13.7549	11.5756	12.0347	11.0938	10.6302	9.68525	9.27704	9.56097	6.80487	6.75031	7.00921	7.08306	5.48737	5.52461	5.69356	5.27888	5.29994	5.74771	6.03099	6.07253
1316.51	13.7703	11.5647	12.0335	11.0827	10.6113	9.65921	9.26291	9.55126	6.80259	6.74036	7.00837	7.07542	5.47461	5.52053	5.68478	5.26802	5.30219	5.70134	6.02018	6.05575
1318.15	13.767	11.5572	12.0219	11.054	10.6002	9.63684	9.24207	9.54597	6.80982	6.72708	7.00021	7.05993	5.46972	5.51701	5.66993	5.25247	5.30273	5.6843	6.00171	6.04327
1319.8	13.7412	11.552	11.9954	11.0271	10.5999	9.62362	9.22735	9.55618	6.81361	6.71612	6.97484	7.04831	5.47604	5.50612	5.65476	5.23877	5.29664	5.69247	5.98792	6.04376
1321.44	13.7109	11.5469	11.9697	11.0172	10.6016	9.60311	9.21798	9.5671	6.79261	6.71266	6.94872	7.03394	5.48121	5.47606	5.64133	5.22369	5.28827	5.70119	5.98086	6.04677
1323.09	13.6879	11.5378	11.961	11.0133	10.5946	9.58841	9.208	9.5584	6.74481	6.71356	6.94463	7.01203	5.46673	5.44099	5.62484	5.20272	5.27629	5.6865	5.97182	6.04195
1324.73	13.66	11.5204	11.9611	11.0037	10.5745	9.58123	9.20103	9.53387	6.71535	6.71159	6.96311	6.99836	5.42129	5.4242	5.61058	5.18854	5.24682	5.63808	5.95892	6.01346
1326.37	13.6381	11.5009	11.9572	10.9745	10.5541	9.57548	9.19788	9.50949	6.7113	6.70408	6.9754	6.97765	5.38217	5.41867	5.59371	5.18108	5.2076	5.59893	5.94199	5.97778
1328.02	13.6387	11.4908	11.9312	10.9368	10.5419	9.55943	9.1924	9.48546	6.70752	6.695	6.95224	6.95529	5.36951	5.41397	5.57318	5.17458	5.18835	5.59893	5.92633	5.96166
1329.66	13.6533	11.4904	11.8882	10.9168	10.5304	9.51429	9.17047	9.45289	6.70736	6.6824	6.90553	6.94564	5.36313	5.40779	5.5622	5.16727	5.18853	5.6144	5.91573	5.94652
1331.3	13.648	11.4831	11.8612	10.9074	10.5129	9.4752	9.13161	9.42974	6.71336	6.65694	6.87458	6.93423	5.35886	5.40093	5.55918	5.15638	5.19041	5.61975	5.90116	5.93193
1332.94	13.5656	11.4622	11.845	10.8948	10.4783	9.47289	9.10104	9.4097	6.71804	6.63315	6.85836	6.92361	5.34576	5.39377	5.55501	5.1451	5.18688	5.60118	5.88804	5.92042
1334.58	13.4598	11.4383	11.8272	10.8759	10.4405	9.48571	9.07706	9.38968	6.70748	6.61911	6.8463	6.91075	5.32852	5.37832	5.54211	5.11957	5.18025	5.57731	5.88182	5.90391
1336.22	13.4254	11.4185	11.8094	10.8541	10.4206	9.49018	9.05208	9.37773	6.67702	6.59457	6.84554	6.88672	5.31878	5.35717	5.51874	5.07742	5.17143	5.57074	5.87812	5.89042
1337.86	13.446	11.3845	11.7787	10.8351	10.4054	9.47368	9.04115	9.36686	6.64734	6.57244	6.86519	6.86481	5.31012	5.34732	5.49753	5.05124	5.15464	5.57863	5.87269	5.87515
1339.5	13.4666	11.3514	11.7474	10.8076	10.3922	9.44741	9.03973	9.35473	6.61993	6.54777	6.88089	6.83724	5.30033	5.3454	5.4795	5.03955	5.13187	5.58337	5.86774	5.85441
1341.14	13.4491	11.3333	11.7189	10.7652	10.382	9.42928	9.03383	9.33288	6.58381	6.50982	6.86472	6.8045	5.28589	5.34148	5.45671	5.02789	5.11389	5.57079	5.86227	5.8361
1342.78	13.4106	11.3165	11.6728	10.7407	10.3691	9.41646	9.01309	9.2925	6.56206	6.48813	6.82293	6.78156	5.26329	5.31997	5.4377	5.0176	5.10127	5.54613	5.84989	5.80788
1344.42	13.3796	11.3021	11.6346	10.7286	10.3494	9.39887	8.97806	9.26524	6.55945	6.47683	6.78865	6.7573	5.24851	5.27451	5.41857	5.00242	5.08929	5.52263	5.82046	5.77792
1346.06	13.3526	11.2757	11.6075	10.712	10.3	9.36503	8.94454	9.25499	6.5573	6.46362	6.76224	6.73448	5.23576	5.23948	5.39793	4.98758	5.07074	5.50307	5.7857	5.75572
1347.69	13.3164	11.2325	11.5749	10.6873	10.2336	9.30176	8.90879	9.2436	6.54093	6.45106	6.73248	6.71786	5.21681	5.22503	5.37674	4.9586	5.03796	5.48211	5.75801	5.71876
1349.33	13.2838	11.1892	11.534	10.6408	10.1999	9.24906	8.86768	9.23099	6.51276	6.42692	6.71587	6.69625	5.2049	5.21359	5.34413	4.90661	5.00517	5.45981	5.73048	5.68631
1350.97	13.2232	11.1339	11.4507	10.5931	10.1756	9.22514	8.83913	9.17877	6.48353	6.39728	6.68697	6.67469	5.1771	5.19676	5.31657	4.87322	4.9793	5.41589	5.70583	5.66436
1352.6	13.1594	11.0827	11.371	10.5515	10.1496	9.20768	8.8109	9.11565	6.45198	6.361	6.65451	6.64396	5.14131	5.16432	5.30061	4.86535	4.9515	5.36862	5.67549	5.63659
1354.24	13.1298	11.0579	11.3528	10.5015	10.1256	9.19243	8.78245	9.08323	6.41243	6.31216	6.63835	6.60112	5.1167	5.12792	5.27949	4.86153	4.92299	5.34041	5.63598	5.61135
1355.87	13.1079	11.041	11.3616	10.4693	10.0902	9.15411	8.75672	9.05764	6.38708	6.28031	6.62187	6.56852	5.09485	5.09528	5.25992	4.85519	4.88928	5.3094	5.60389	5.5883
1357.51	13.0892	11.0304	11.3698	10.455	10.0599	9.10113	8.71464	9.04196	6.3766	6.27152	6.60676	6.53868	5.07589	5.05452	5.2364	4.84028	4.8566	5.28718	5.56429	5.56449
1359.14	13.0564	11.0165	11.3527	10.4416	10.041	9.07163	8.6848	9.02722	6.36618	6.26805	6.59101	6.51133	5.05765	5.02148	5.20716	4.82329	4.84383	5.27949	5.52274	5.53797
1360.77	13.0019	10.9897	11.3135	10.4178	10.019	9.0474	8.67484	8.9994	6.35375	6.26165	6.56738	6.49656	5.036	5.00615	5.18436	4.8074	4.84405	5.27313	5.49637	5.48897
1362.41	12.9647	10.966	11.2844	10.3486	9.9958	9.02236	8.66252	8.98218	6.32767	6.23967	6.54114	6.48821	5.01539	4.99882	5.16122	4.787	4.845	5.26635	5.46872	5.44783
1364.04	12.9274	10.9038	11.2595	10.2824	9.94539	9.00075	8.65049	8.97001	6.30211	6.21861	6.4902	6.4819	4.97638	4.99499	5.14279	4.77203	4.83373	5.22864	5.4469	5.44397
1365.67	12.8885	10.8252	11.2289	10.27	9.8847	8.97718	8.61488	8.95469	6.28463	6.21328	6.43323	6.46871	4.93182	4.97813	5.13527	4.76252	4.80496	5.17856	5.43521	5.45
1367.3	12.8747	10.7925	11.1948	10.2805	9.85176	8.9649	8.56702	8.93846	6.25785	6.21253	6.41075	6.4436	4.91309	4.95455	5.1282	4.75243	4.77781	5.15943	5.42183	5.4532
1368.93	12.8702	10.7821	11.1408	10.2866	9.82621	8.96427	8.55374	8.90979	6.24248	6.20965	6.40842	6.42308	4.90932	4.95221	5.12201	4.74889	4.75118	5.15526	5.41109	5.4243
1370.56	12.8649	10.7764	11.1005	10.2637	9.80919	8.96321	8.56025	8.88386	6.24337	6.18536	6.40932	6.39858	4.90773	4.96329	5.10983	4.759	4.72391	5.1522	5.39615	5.37474
1372.19	12.8512	10.7605	11.1058	10.2222	9.80868	8.95888	8.56449	8.86111	6.2436	6.14077	6.39747	6.37052	4.8973	4.97059	5.08837	4.77489	4.71623	5.14162	5.37981	5.35582
1373.82	12.8278	10.7279	11.1318	10.2051	9.81659	8.94578	8.56413	8.81879	6.24097	6.12398	6.36867	6.35723	4.87651	4.95966	5.07301	4.76822	4.73393	5.12297	5.37498	5.36485
1375.45	12.814	10.7125	11.1467	10.2038	9.82112	8.93216	8.55825	8.79607	6.22344	6.13765	6.35037	6.34794	4.86451	4.93024	5.06001	4.72701	4.75562	5.11089	5.36271	5.37822
1377.08	12.7988	10.7228	11.1122	10.2021	9.79006	8.92014	8.55	8.8054	6.20508	6.15419	6.34992	6.34258	4.86632	4.91299	5.04894	4.69329	4.75784	5.10776	5.34978	5.38054
1378.71	12.7755	10.7362	11.0554	10.2027	9.74114	8.89822	8.53072	8.82076	6.20713	6.16232	6.35201	6.34748	4.87027	4.91371	5.04933	4.68396	4.74589	5.10562	5.34878	5.37339
1380.34	12.7666	10.7393	11.0368	10.192	9.73178	8.88343	8.50399	8.8262	6.21906	6.16267	6.34931	6.35853	4.86948	4.91714	5.05819	4.67949	4.73786	5.10252	5.3491	5.36513
1381.96	12.7758	10.7213	11.0466	10.1817	9.76267	8.8822	8.49452	8.82899	6.22713	6.16034	6.33629	6.36786	4.85619	4.92042	5.06617	4.676	4.73771	5.093	5.34921	5.35288
1383.59	12.7857	10.6976	11.0589	10.1701	9.79464	8.88202	8.50163	8.82932	6.22119	6.15102	6.32455	6.37425	4.84313	4.92182	5.07076	4.67343	4.73842	5.0846	5.34249	5.3362
1385.22	12.7709	10.6809	11.061	10.145	9.79763	8.87932	8.50796	8.82369	6.20215	6.13013	6.32543	6.37907	4.84374	4.92415	5.07714	4.67037	4.7334	5.08298	5.32893	5.32978
1386.84	12.7193	10.6592	11.0573	10.133	9.78427	8.86603	8.50086	8.81696	6.18502	6.11726	6.3312	6.37841	4.85121	4.91058	5.07801	4.66687	4.70872	5.07739	5.32061	5.33881
1388.47	12.6823	10.6478	11.0535	10.1345	9.77479	8.8502	8.48092	8.8082	6.17369	6.12191	6.33661	6.36343	4.86081	4.87043	5.06313	4.66345	4.67828	5.07481	5.30876	5.35174
1390.09	12.6846	10.6386	11.0541	10.1343	9.74938	8.84764	8.46563	8.77968	6.16498	6.1326	6.33257	6.34271	4.87247	4.84301	5.04141	4.66263	4.66907	5.079	5.29734	5.35518
1391.72	12.6947	10.6185	11.0568	10.1317	9.69806	8.85317	8.45209	8.73594	6.15826	6.1313	6.3201	6.3285	4.88417	4.84023	5.03387	4.6643	4.67209	5.0836	5.30205	5.35125
1393.34	12.6966	10.6124	11.0547	10.1225	9.67789	8.85183	8.43302	8.72043	6.147	6.10834	6.31305	6.31492	4.88554	4.84082	5.04037	4.66544	4.67263	5.084	5.32684	5.34823
1394.97	12.6823	10.6132	11.0449	10.1101	9.68491	8.82555	8.42203	8.73765	6.13758	6.08642	6.29725	6.30407	4.85312	4.84126	5.04606	4.66472	4.66633	5.07681	5.34837	5.35011
1396.59	12.6612	10.6082	11.0339	10.0844	9.69227	8.77646	8.41747	8.75681	6.13634	6.07707	6.27672	6.30058	4.81289	4.84486	5.04533	4.65443	4.65642	5.0678	5.33625	5.35296
1398.21	12.6395	10.5919	11.0297	10.0337	9.68738	8.74318	8.41351	8.75157	6.13902	6.06502	6.26573	6.30247	4.80089	4.85077	5.04488	4.63861	4.65001	5.05992	5.30034	5.35487
1399.83	12.6027	10.5596	11.0319	10.002	9.67091	8.72739	8.40383	8.72296	6.13742	6.05412	6.2555	6.30503	4.79947	4.84963	5.037	4.62967	4.64478	5.03897	5.2836	5.3545
1401.46	12.5683	10.5341	11.0288	10.0046	9.65193	8.71165	8.38192	8.69336	6.11936	6.04127	6.24628	6.2964	4.80022	4.84018	5.00929	4.62441	4.63932	5.02244	5.3052	5.3507
1403.08	12.5494	10.5309	11.0057	10.0143	9.6299	8.70987	8.36054	8.66939	6.09211	6.02742	6.2374	6.28173	4.80247	4.83181	4.97414	4.62189	4.63274	5.01544	5.33497	5.34205
1404.7	12.5374	10.5345	10.966	10.0197	9.60084	8.72525	8.34214	8.64106	6.07621	6.02471	6.22695	6.27473	4.80698	4.82179	4.9642	4.62933	4.61846	5.00339	5.33281	5.3235
1406.32	12.5316	10.5316	10.9316	10.0271	9.58223	8.73502	8.32186	8.62634	6.06265	6.02953	6.22126	6.27299	4.8082	4.80655	4.97661	4.64458	4.60606	4.99966	5.28659	5.3048
1407.94	12.53	10.5144	10.8934	10.0333	9.57519	8.71032	8.3101	8.62972	6.05142	6.03459	6.2287	6.27386	4.80042	4.80001	4.98847	4.65442	4.61251	4.99849	5.24218	5.30163
1409.56	12.5266	10.4937	10.8543	10.0154	9.57175	8.6562	8.3116	8.63879	6.05266	6.04127	6.23832	6.27184	4.79009	4.80334	4.98534	4.6574	4.63243	4.99517	5.24127	5.3134
1411.18	12.5128	10.4815	10.8347	9.96331	9.57018	8.62563	8.3174	8.64348	6.06269	6.05356	6.23033	6.26267	4.78694	4.80733	4.96929	4.65919	4.64286	4.99286	5.26175	5.32539
1412.79	12.4762	10.4647	10.83	9.9312	9.57536	8.63265	8.31487	8.64688	6.06625	6.06189	6.19564	6.25799	4.78937	4.8061	4.95834	4.66196	4.65226	4.98373	5.27323	5.33117
1414.41	12.4386	10.4472	10.8295	9.94442	9.58043	8.64426	8.30359	8.64849	6.05842	6.07254	6.1644	6.26472	4.79205	4.80098	4.95531	4.66615	4.66451	4.9775	5.27012	5.33477
1416.03	12.4188	10.4357	10.831	9.96793	9.5692	8.64569	8.29559	8.6446	6.04937	6.09188	6.16802	6.27424	4.79267	4.79899	4.95016	4.67045	4.6642	4.99003	5.26437	5.33831
1417.65	12.407	10.4268	10.8389	9.97402	9.53809	8.63624	8.29053	8.63508	6.04791	6.0965	6.19655	6.2738	4.79405	4.82298	4.95252	4.67902	4.65089	5.01824	5.26304	5.33421
1419.26	12.397	10.4181	10.8393	9.96277	9.52115	8.62489	8.28331	8.62856	6.06361	6.08564	6.21391	6.24694	4.79535	4.8709	4.97139	4.69508	4.63857	5.03249	5.27449	5.32888
1420.88	12.4042	10.4036	10.8257	9.95189	9.52666	8.61011	8.28314	8.62814	6.07989	6.07574	6.20963	6.21917	4.80758	4.89272	4.99304	4.71031	4.64092	5.03238	5.29	5.34307
1422.5	12.4226	10.3881	10.8094	9.94579	9.53505	8.58942	8.29662	8.62998	6.08003	6.07489	6.20301	6.23468	4.82645	4.88633	5.00384	4.72421	4.65449	5.03175	5.30228	5.38587
1424.11	12.4264	10.3832	10.8033	9.93983	9.53542	8.57774	8.31537	8.63177	6.07455	6.07825	6.20673	6.29688	4.83472	4.87945	5.01269	4.73893	4.66285	5.0313	5.31996	5.42323
1425.73	12.4337	10.385	10.8093	9.93446	9.53269	8.58314	8.33389	8.63422	6.07233	6.08409	6.21871	6.34291	4.84067	4.87916	5.01829	4.75552	4.67558	5.04687	5.33154	5.42609
1427.34	12.4435	10.3884	10.8173	9.92737	9.52875	8.59644	8.35899	8.63464	6.08202	6.09925	6.22891	6.34816	4.84703	4.8867	5.02068	4.78705	4.69739	5.06558	5.34828	5.41305
1428.95	12.4439	10.3931	10.8225	9.91683	9.51807	8.60915	8.38052	8.62437	6.10249	6.12586	6.23618	6.34298	4.85584	4.8957	5.02443	4.818	4.71881	5.08044	5.3762	5.41584
1430.57	12.4344	10.4019	10.8332	9.9207	9.49759	8.62379	8.38597	8.60045	6.11871	6.15512	6.25248	6.34521	4.87333	4.90072	5.03326	4.82029	4.74745	5.10931	5.39387	5.45916
1432.18	12.4318	10.4054	10.8396	9.96113	9.48898	8.64009	8.38332	8.59045	6.13159	6.20324	6.26244	6.3876	4.88952	4.90419	5.05917	4.80252	4.77556	5.12978	5.41144	5.51706
1433.79	12.4502	10.3925	10.8413	10.0085	9.51739	8.65617	8.39048	8.61168	6.14299	6.25119	6.25897	6.43928	4.90376	4.92135	5.09231	4.79532	4.80268	5.14457	5.43419	5.55326
1435.41	12.4763	10.3764	10.845	10.0269	9.56506	8.67683	8.43147	8.64609	6.15283	6.26543	6.25422	6.4585	4.92199	4.97587	5.12455	4.81352	4.83902	5.16365	5.4637	5.58643
1437.02	12.4897	10.3857	10.8503	10.0379	9.59406	8.69828	8.48676	8.67213	6.17218	6.26685	6.26235	6.47512	4.94658	5.04311	5.17527	4.84191	4.86457	5.17613	5.50841	5.61172
1438.63	12.5099	10.4563	10.8603	10.0486	9.61802	8.74278	8.50984	8.70245	6.19058	6.27191	6.31007	6.48736	5.0066	5.07938	5.21862	4.85843	4.87935	5.20645	5.54072	5.61996
1440.24	12.5279	10.5302	10.8764	10.0793	9.64094	8.81299	8.50959	8.73229	6.20854	6.28699	6.36108	6.50943	5.06744	5.10399	5.25025	4.86812	4.89391	5.23938	5.54726	5.62268
1441.85	12.5191	10.5523	10.9065	10.1373	9.66508	8.84506	8.51148	8.7588	6.23385	6.30565	6.3767	6.54733	5.09279	5.12147	5.28905	4.87442	4.90849	5.25942	5.54858	5.62715
1443.46	12.482	10.5644	10.9584	10.1624	9.70748	8.83449	8.52356	8.8005	6.24868	6.31591	6.38026	6.56523	5.1114	5.12441	5.30405	4.87881	4.92852	5.29244	5.55666	5.65081
1445.07	12.4538	10.5713	10.9916	10.1494	9.73871	8.82206	8.54215	8.82446	6.25868	6.3178	6.38424	6.56213	5.12221	5.12678	5.29387	4.8839	4.94835	5.31934	5.60949	5.68188
1446.68	12.4512	10.567	10.9857	10.1366	9.74751	8.82734	8.5495	8.82474	6.27175	6.31975	6.39695	6.5501	5.1219	5.12798	5.28028	4.88065	4.95887	5.34089	5.67239	5.69202
1448.29	12.4545	10.5566	10.9655	10.1324	9.74784	8.84656	8.52486	8.82262	6.28024	6.31751	6.4138	6.53308	5.11533	5.12861	5.26694	4.86215	4.96168	5.367	5.68285	5.6862
1449.89	12.4507	10.5546	10.9491	10.1234	9.73786	8.86549	8.4839	8.81474	6.28466	6.30055	6.42398	6.51121	5.10813	5.12879	5.2456	4.83615	4.96355	5.38098	5.65863	5.67723
1451.5	12.4141	10.5407	10.9157	10.1091	9.69145	8.87821	8.46226	8.79704	6.28795	6.28612	6.41486	6.48981	5.0888	5.12517	5.23201	4.81411	4.94938	5.36684	5.63334	5.65948
1453.11	12.3705	10.5237	10.8772	10.0855	9.63943	8.88722	8.45056	8.77692	6.28751	6.27524	6.40235	6.45473	5.06648	5.11631	5.231	4.78972	4.9224	5.3513	5.61605	5.62558
1454.72	12.3487	10.5169	10.8554	10.0463	9.62136	8.88037	8.43736	8.75639	6.28007	6.24957	6.39961	6.40134	5.05124	5.10334	5.2251	4.76449	4.90663	5.35859	5.59407	5.59787
1456.32	12.323	10.4999	10.8353	10.0082	9.6167	8.83205	8.41123	8.71939	6.27243	6.22545	6.38672	6.36684	5.02722	5.06748	5.21023	4.73338	4.89534	5.3609	5.57146	5.55231
1457.93	12.2937	10.4872	10.8132	9.97021	9.60549	8.76888	8.36625	8.68774	6.25726	6.19837	6.3757	6.33891	5.00475	5.00443	5.16737	4.68821	4.88261	5.35674	5.53902	5.49337
1459.53	12.249	10.4631	10.7816	9.9274	9.56625	8.73235	8.33116	8.6468	6.23366	6.16211	6.36605	6.30968	4.99013	4.95465	5.11411	4.65709	4.84369	5.30776	5.49773	5.46072
1461.14	12.1873	10.4128	10.7401	9.87864	9.5113	8.70351	8.29444	8.58338	6.20996	6.12139	6.34729	6.2875	4.97395	4.9206	5.08502	4.62223	4.76507	5.2162	5.45581	5.43236
1462.74	12.1349	10.3693	10.7016	9.81254	9.47699	8.67017	8.25744	8.54292	6.17656	6.06878	6.32472	6.24789	4.94519	4.88694	5.06019	4.57896	4.70837	5.16575	5.40482	5.39941
1464.35	12.0557	10.3061	10.6647	9.75702	9.4378	8.62736	8.23591	8.51168	6.13725	6.01365	6.26004	6.20086	4.85608	4.85332	5.02995	4.55577	4.68739	5.12696	5.35773	5.34402
1465.95	11.9792	10.2363	10.6249	9.72174	9.39208	8.57513	8.18955	8.47726	6.08785	5.96032	6.1873	6.14242	4.75643	4.80706	4.98505	4.5243	4.67298	5.09032	5.31991	5.2534
1467.55	11.949	10.1908	10.5747	9.68414	9.3537	8.51977	8.14747	8.43893	6.023	5.90288	6.15207	6.06052	4.7113	4.75623	4.92087	4.493	4.64739	5.06626	5.2785	5.18023
1469.15	11.9212	10.1555	10.5008	9.64955	9.30884	8.45552	8.12181	8.38815	5.97161	5.84878	6.11613	5.99096	4.68391	4.70902	4.86793	4.47334	4.59325	5.01772	5.23809	5.13405
1470.76	11.8914	10.1222	10.4309	9.59803	9.2616	8.39635	8.07497	8.34052	5.93597	5.79578	6.07925	5.93667	4.65859	4.65968	4.82814	4.43933	4.53034	4.96703	5.18698	5.09641
1472.36	11.8387	10.0815	10.3772	9.53571	9.20971	8.36773	8.0353	8.29601	5.90062	5.74133	6.0243	5.88819	4.61708	4.61263	4.78749	4.39574	4.48488	4.91217	5.12542	5.06508
1473.96	11.764	10.031	10.3265	9.49712	9.1511	8.3599	7.98309	8.248	5.86368	5.68711	5.94845	5.8462	4.56151	4.56775	4.74598	4.32205	4.44805	4.84048	5.06347	5.03177
1475.56	11.7193	9.97896	10.2795	9.47148	9.09855	8.34416	7.91043	8.21368	5.82236	5.62875	5.89599	5.80064	4.52142	4.5236	4.69828	4.23794	4.40487	4.78287	4.99215	4.99716
1477.16	11.6986	9.91459	10.2318	9.44559	9.04967	8.29276	7.86053	8.17518	5.78104	5.58165	5.86471	5.75924	4.49737	4.48073	4.65167	4.1982	4.33928	4.73222	4.93256	4.95737
1478.76	11.6791	9.85027	10.1876	9.41115	9.001	8.21392	7.82408	8.13115	5.74144	5.55435	5.83613	5.7207	4.47315	4.43624	4.6078	4.17912	4.27014	4.68843	4.89742	4.90637
1480.36	11.6442	9.80126	10.1471	9.36653	8.94849	8.15438	7.78968	8.08994	5.70195	5.53397	5.79833	5.67309	4.43424	4.4	4.56157	4.16746	4.23157	4.66096	4.86713	4.86306
1481.96	11.5802	9.75175	10.0929	9.32224	8.88526	8.11803	7.7482	8.04322	5.66415	5.51189	5.74407	5.63105	4.37696	4.36862	4.52043	4.15519	4.20251	4.63987	4.84234	4.8257
1483.56	11.5236	9.71524	10.0478	9.27316	8.83894	8.08668	7.69504	7.99625	5.62396	5.48079	5.6906	5.59042	4.32913	4.33281	4.48064	4.12942	4.18444	4.61352	4.79596	4.78725
1485.15	11.4897	9.69369	10.0154	9.22442	8.81986	8.05603	7.6568	7.94983	5.58887	5.45026	5.64683	5.55168	4.29777	4.30567	4.44388	4.10548	4.17026	4.54998	4.73849	4.74939
1486.75	11.4611	9.67313	9.98223	9.19301	8.80712	8.01957	7.63477	7.90742	5.57053	5.42791	5.60863	5.52534	4.26773	4.27963	4.41927	4.07219	4.13712	4.46254	4.70636	4.69279
1488.35	11.4404	9.65356	9.9601	9.16733	8.79208	7.98623	7.6158	7.88384	5.5572	5.3999	5.57953	5.49905	4.24498	4.24938	4.39845	4.03169	4.10803	4.42402	4.67765	4.64152
1489.95	11.4129	9.61135	9.93053	9.1394	8.75126	7.95617	7.58901	7.86769	5.54342	5.37615	5.5482	5.48166	4.19757	4.22779	4.38162	4.00395	4.07886	4.41368	4.65341	4.62348
1491.54	11.3852	9.56648	9.90106	9.09247	8.70531	7.92334	7.54508	7.85422	5.51661	5.35702	5.52524	5.47639	4.15176	4.21202	4.36444	3.98046	4.04901	4.40866	4.63616	4.61807
1493.14	11.3647	9.5478	9.87509	9.02469	8.6813	7.89133	7.51268	7.83732	5.47173	5.33074	5.52065	5.46723	4.14841	4.20025	4.33889	3.96532	4.03554	4.40266	4.61586	4.61305
1494.73	11.3299	9.53813	9.81234	8.98764	8.66153	7.85689	7.5028	7.79341	5.44517	5.31838	5.50846	5.45928	4.16352	4.18081	4.31291	3.96375	4.02783	4.3732	4.60683	4.58356
1496.33	11.2957	9.53237	9.77175	8.97967	8.64284	7.82834	7.49677	7.75958	5.43661	5.31691	5.49958	5.4349	4.17503	4.15017	4.27871	3.9665	4.02237	4.3454	4.59358	4.54059
1497.92	11.255	9.50191	9.76994	8.97685	8.61815	7.81709	7.49115	7.73987	5.4279	5.31314	5.4746	5.40247	4.1601	4.13073	4.24425	3.96808	4.00899	4.31866	4.57067	4.5257
1499.52	11.2016	9.44418	9.76779	8.97343	8.59131	7.81403	7.46954	7.7137	5.40641	5.30554	5.42362	5.39033	4.12737	4.11302	4.23288	3.9589	3.98058	4.28373	4.54945	4.5268
1501.11	11.1686	9.40919	9.77083	8.94383	8.58243	7.80492	7.44106	7.70407	5.34925	5.28818	5.39378	5.37994	4.10886	4.0921	4.23686	3.94322	3.95861	4.27112	4.51923	4.52973
1502.7	11.1409	9.3681	9.75757	8.92052	8.57761	7.77362	7.42269	7.70942	5.30784	5.26999	5.3755	5.37216	4.09267	4.08959	4.23971	3.92688	3.93412	4.27401	4.4926	4.51818
1504.3	11.1132	9.32897	9.73827	8.91369	8.57028	7.72985	7.39423	7.7146	5.30563	5.25114	5.36223	5.36578	4.079	4.10234	4.22849	3.89504	3.91066	4.27856	4.48515	4.48507
1505.89	11.0908	9.32035	9.72081	8.89676	8.55352	7.7095	7.36996	7.69933	5.30633	5.22851	5.36012	5.3501	4.07095	4.11314	4.2069	3.87047	3.90737	4.27219	4.48717	4.46669
1507.48	11.0661	9.32446	9.67299	8.88057	8.50658	7.70787	7.35774	7.6488	5.30942	5.21998	5.3622	5.3421	4.04611	4.09584	4.19222	3.87087	3.91173	4.24145	4.48738	4.46948
1509.07	11.0448	9.32625	9.63655	8.85132	8.46912	7.70847	7.34293	7.61363	5.30998	5.21934	5.36151	5.32525	4.03109	4.05473	4.17655	3.88095	3.91506	4.21868	4.47256	4.47491
1510.66	11.016	9.30501	9.62615	8.81896	8.44908	7.70721	7.33291	7.6132	5.30961	5.21878	5.35451	5.30202	4.02634	4.03419	4.15961	3.88766	3.9152	4.20749	4.45153	4.47079
1512.25	10.9779	9.26723	9.62022	8.80707	8.42811	7.6972	7.32649	7.618	5.3077	5.22407	5.34366	5.29573	4.01619	4.04401	4.15613	3.88982	3.91333	4.19318	4.44034	4.44626
1513.84	10.956	9.24284	9.62016	8.79438	8.42106	7.68933	7.32223	7.61784	5.2941	5.22901	5.32946	5.28804	4.01504	4.06069	4.15537	3.89118	3.91232	4.19248	4.42296	4.4227
1515.43	10.943	9.22182	9.60522	8.77742	8.42736	7.67446	7.32307	7.60671	5.28092	5.23174	5.29711	5.27866	4.01279	4.06393	4.1529	3.89122	3.90202	4.20375	4.40723	4.41501
1517.02	10.9379	9.20467	9.58301	8.75837	8.43231	7.64908	7.32456	7.59575	5.27205	5.21662	5.26909	5.27081	4.00913	4.05097	4.1431	3.88207	3.88843	4.21103	4.3985	4.40782
1518.61	10.9369	9.19603	9.55845	8.74137	8.4193	7.63584	7.32614	7.59003	5.25972	5.17906	5.26396	5.26024	4.00703	4.03471	4.12624	3.87401	3.88289	4.19401	4.38647	4.40234
1520.2	10.9177	9.18338	9.51445	8.73329	8.38719	7.62132	7.32161	7.57356	5.25302	5.15795	5.25198	5.2551	3.99888	4.0075	4.11893	3.86446	3.87597	4.14815	4.37625	4.39152
1521.78	10.9053	9.17639	9.4931	8.72434	8.36579	7.6072	7.30837	7.56149	5.25323	5.1518	5.24272	5.24875	3.99037	3.97249	4.12017	3.84803	3.87164	4.11849	4.36728	4.37556
1523.37	10.9014	9.16645	9.5003	8.71303	8.35366	7.6001	7.29297	7.56312	5.255	5.14702	5.23832	5.23714	3.97859	3.96093	4.12158	3.834	3.86051	4.12266	4.35882	4.36468
1524.96	10.8932	9.14952	9.50752	8.70553	8.33669	7.58438	7.26891	7.56832	5.24339	5.13935	5.23387	5.2201	3.96515	3.97091	4.11959	3.81533	3.84022	4.13505	4.35413	4.34888
1526.54	10.8835	9.14302	9.5065	8.69391	8.32748	7.56828	7.24482	7.56397	5.20606	5.11694	5.23001	5.18852	3.96238	3.98274	4.11039	3.7989	3.83105	4.13891	4.35235	4.33696
1528.13	10.8371	9.13964	9.46165	8.68116	8.32713	7.54616	7.23687	7.53166	5.18279	5.10291	5.20407	5.16441	3.96043	3.98682	4.10264	3.80211	3.8333	4.12514	4.35197	4.34186
1529.72	10.7873	9.13569	9.41623	8.66204	8.3289	7.51774	7.23752	7.49721	5.1851	5.09988	5.17691	5.17022	3.95653	3.98243	4.09407	3.82366	3.83646	4.11023	4.35489	4.3535
1531.3	10.7659	9.12182	9.41477	8.63591	8.32443	7.5114	7.23608	7.48292	5.18677	5.09221	5.16686	5.18998	3.94712	3.97779	4.08007	3.83603	3.83004	4.1101	4.36004	4.35972
1532.89	10.7428	9.08672	9.42614	8.62412	8.30933	7.52924	7.22162	7.47044	5.18788	5.08992	5.15403	5.1977	3.92584	3.97094	4.0727	3.82727	3.81379	4.117	4.36118	4.33905
1534.47	10.7281	9.06724	9.43037	8.62315	8.29309	7.54395	7.19903	7.46173	5.18172	5.08571	5.15028	5.16441	3.91197	3.9618	4.06563	3.81248	3.80481	4.11872	4.34289	4.30691
1536.05	10.7215	9.07949	9.40525	8.6205	8.27183	7.53548	7.18905	7.46017	5.1737	5.0818	5.16217	5.11841	3.90817	3.95923	4.0572	3.80668	3.81232	4.09385	4.3168	4.30155
1537.64	10.7136	9.09663	9.36909	8.60788	8.24741	7.51189	7.19343	7.46056	5.16662	5.08533	5.17705	5.1084	3.9053	3.96186	4.05263	3.80848	3.82425	4.05782	4.30308	4.3181
1539.22	10.701	9.09085	9.3592	8.58147	8.23323	7.49877	7.19719	7.45417	5.15229	5.08892	5.18111	5.12217	3.90268	3.96187	4.0492	3.81219	3.82427	4.04716	4.29074	4.33282
1540.8	10.6795	9.05677	9.37565	8.56508	8.22578	7.50863	7.20818	7.43753	5.14385	5.08732	5.17756	5.13474	3.90071	3.96326	4.04612	3.81448	3.80311	4.06186	4.28239	4.3307
1542.38	10.6622	9.02649	9.39222	8.57811	8.2207	7.52358	7.23325	7.42267	5.15274	5.07795	5.1724	5.13396	3.89977	3.97105	4.04093	3.81486	3.78112	4.0771	4.27807	4.31782
1543.96	10.6615	9.02864	9.39878	8.60404	8.22029	7.52092	7.24375	7.43435	5.16742	5.06475	5.16105	5.12562	3.90105	3.9769	4.03384	3.81285	3.78939	4.0777	4.27173	4.30913
1545.55	10.6704	9.04868	9.41023	8.60903	8.22684	7.50438	7.22825	7.47546	5.16972	5.05459	5.13833	5.12003	3.90412	3.97998	4.03502	3.79306	3.82277	4.07445	4.26637	4.30594
1547.13	10.6775	9.05629	9.40976	8.59425	8.22626	7.49141	7.20726	7.49123	5.16687	5.05026	5.12929	5.10715	3.90385	3.98258	4.05123	3.76741	3.83674	4.06997	4.25283	4.30332
1548.71	10.6781	9.04881	9.3898	8.57946	8.20497	7.49348	7.19913	7.47051	5.16299	5.04976	5.1569	5.09229	3.9085	3.97656	4.06415	3.76408	3.8131	4.05102	4.23979	4.296
1550.29	10.6751	9.03937	9.36614	8.57754	8.18059	7.50717	7.19926	7.44326	5.15467	5.05811	5.19322	5.08951	3.91572	3.95723	4.05835	3.78349	3.78102	4.0273	4.24984	4.28213
1551.87	10.6736	9.03298	9.35671	8.58758	8.17963	7.51451	7.19979	7.42784	5.1461	5.07878	5.19609	5.09326	3.91302	3.93758	4.04466	3.79875	3.77446	4.02167	4.28097	4.27129
1553.44	10.684	9.0323	9.36303	8.5902	8.20091	7.51003	7.19541	7.41835	5.13995	5.088	5.16571	5.09597	3.90108	3.9321	4.03833	3.79509	3.79301	4.02751	4.30325	4.27884
1555.02	10.6898	9.02874	9.36947	8.58251	8.22194	7.50267	7.18374	7.41206	5.12989	5.07745	5.13712	5.09479	3.89288	3.93601	4.04328	3.78632	3.80998	4.03233	4.28796	4.29767
1556.6	10.6615	9.00963	9.37081	8.57401	8.23049	7.49794	7.1719	7.40835	5.11656	5.06424	5.12736	5.09278	3.8998	3.93645	4.05007	3.78048	3.81031	4.03852	4.25315	4.30301
1558.18	10.6069	8.97997	9.37351	8.56652	8.2347	7.49417	7.16415	7.40553	5.11645	5.06591	5.11952	5.09521	3.91426	3.94102	4.05017	3.77642	3.80589	4.05352	4.24076	4.29611
1559.75	10.5809	8.96495	9.36565	8.56608	8.23297	7.48665	7.15885	7.40206	5.13016	5.08717	5.11556	5.1026	3.91885	3.94968	4.03885	3.77407	3.80259	4.05821	4.26418	4.28806
1561.33	10.5967	8.97669	9.32853	8.56634	8.22094	7.4671	7.15367	7.3988	5.13813	5.10369	5.12457	5.10895	3.90362	3.95146	4.0287	3.77945	3.80149	4.05719	4.29203	4.28003
1562.91	10.6219	8.99382	9.28829	8.56286	8.20667	7.43956	7.14937	7.39629	5.13277	5.10207	5.13497	5.10198	3.88479	3.94937	4.02937	3.79774	3.79989	4.05513	4.29042	4.2679
1564.48	10.6327	8.99597	9.28354	8.55968	8.20298	7.43082	7.146	7.39892	5.1255	5.09525	5.13351	5.07933	3.88127	3.94663	4.03505	3.80916	3.7916	4.04833	4.26984	4.25772
1566.06	10.641	8.99544	9.31011	8.55949	8.2114	7.44759	7.14799	7.41762	5.11593	5.08903	5.13509	5.06282	3.88923	3.92999	4.03684	3.79154	3.77231	4.03693	4.25504	4.26027
1567.63	10.6439	8.99634	9.32962	8.56438	8.21626	7.46515	7.15391	7.43034	5.10489	5.08022	5.13569	5.06264	3.89429	3.90337	4.03466	3.76115	3.75853	4.02849	4.24779	4.26968
1569.21	10.6399	8.9929	9.32283	8.56674	8.21214	7.4651	7.15673	7.41555	5.0956	5.06854	5.13412	5.06734	3.89629	3.89521	4.03278	3.75061	3.76319	4.03402	4.24198	4.27103
1570.78	10.6333	8.98289	9.30851	8.55135	8.20523	7.45455	7.16868	7.38757	5.08983	5.06031	5.13379	5.06523	3.90025	3.91017	4.0301	3.75164	3.77497	4.04727	4.24074	4.27305
1572.35	10.6241	8.97564	9.29829	8.51611	8.18963	7.44595	7.18462	7.3736	5.08586	5.05379	5.13081	5.06329	3.89366	3.9266	4.02635	3.75438	3.77688	4.0471	4.25211	4.27773
1573.93	10.607	8.9648	9.29348	8.49241	8.14133	7.44505	7.1781	7.35804	5.08596	5.04861	5.11384	5.06219	3.87116	3.92774	4.02329	3.75424	3.76985	4.02527	4.26349	4.28156
1575.5	10.5924	8.95397	9.29105	8.50299	8.09566	7.44774	7.1513	7.34229	5.09633	5.04367	5.09664	5.0676	3.85019	3.91845	4.02498	3.74954	3.76208	4.00416	4.25807	4.28724
1577.07	10.5891	8.95044	9.29737	8.52927	8.09888	7.44498	7.13377	7.34228	5.1136	5.03822	5.10304	5.08374	3.84828	3.91053	4.03162	3.74414	3.75344	4.00734	4.24108	4.29049
1578.64	10.5871	8.95106	9.32178	8.53465	8.13746	7.43433	7.14039	7.35986	5.11687	5.03401	5.13432	5.09113	3.85824	3.91054	4.03476	3.73166	3.73663	4.02752	4.22772	4.28661
1580.21	10.5876	8.95154	9.33241	8.5141	8.16387	7.42336	7.15438	7.37219	5.09991	5.02855	5.15043	5.07364	3.86392	3.91388	4.03191	3.71799	3.72493	4.03846	4.21594	4.2794
1581.79	10.5939	8.94897	9.28766	8.49425	8.16467	7.42053	7.155	7.35978	5.08147	5.02292	5.11496	5.04769	3.86056	3.91328	4.02901	3.7161	3.71542	4.02671	4.20397	4.27345
1583.36	10.5989	8.94349	9.22224	8.48988	8.15945	7.42463	7.14837	7.33788	5.08442	5.02321	5.06247	5.0431	3.85573	3.91443	4.03224	3.72002	3.70606	4.00818	4.19615	4.26407
1584.93	10.5894	8.93294	9.20658	8.49353	8.15306	7.42255	7.14061	7.33174	5.11028	5.03049	5.05076	5.06555	3.8546	3.91723	4.04091	3.72457	3.70409	3.99983	4.19143	4.2582
1586.5	10.5574	8.90317	9.23898	8.49239	8.13632	7.40718	7.12161	7.33841	5.12196	5.03293	5.07459	5.08587	3.86416	3.90888	4.04325	3.73562	3.70892	3.99849	4.18961	4.26543
1588.06	10.5275	8.8761	9.26685	8.47654	8.11822	7.38964	7.09419	7.34367	5.10069	5.02516	5.09523	5.07903	3.87405	3.89141	4.0285	3.75298	3.71409	3.9997	4.21513	4.27904
1589.63	10.5181	8.87132	9.25418	8.45475	8.10922	7.37688	7.07823	7.33461	5.07285	5.01565	5.08677	5.05798	3.87994	3.88448	4.00689	3.75645	3.72469	4.0041	4.26404	4.28634
1591.2	10.5161	8.87579	9.22642	8.44653	8.1061	7.36091	7.08011	7.3152	5.06919	5.01052	5.06635	5.04786	3.88889	3.89792	3.99585	3.73035	3.74306	4.01355	4.28364	4.28491
1592.77	10.5128	8.87875	9.21263	8.45109	8.10389	7.34929	7.08526	7.30537	5.08707	5.00656	5.05623	5.05807	3.89007	3.91665	3.98768	3.70058	3.74886	4.02238	4.2642	4.28073
1594.34	10.5095	8.89285	9.2139	8.45395	8.09949	7.3444	7.08917	7.31702	5.10109	5.00447	5.06918	5.07412	3.87861	3.91911	3.98087	3.69626	3.73529	4.03548	4.23803	4.28191
1595.9	10.5055	8.9097	9.21681	8.44593	8.09306	7.33732	7.10213	7.33457	5.10027	5.01394	5.08456	5.08285	3.86563	3.90725	3.9809	3.70857	3.71972	4.04971	4.23346	4.29125
1597.47	10.4947	8.89918	9.2155	8.43198	8.08566	7.3388	7.11162	7.34317	5.09513	5.03558	5.07776	5.09342	3.86545	3.89839	3.98567	3.71996	3.71883	4.05206	4.24396	4.29921
1599.04	10.4766	8.84472	9.21136	8.42565	8.08043	7.36242	7.09427	7.35575	5.08881	5.04213	5.05578	5.10106	3.88108	3.90145	3.99487	3.72954	3.72642	4.03386	4.25241	4.29915
1600.6	10.4623	8.80493	9.2075	8.42869	8.07708	7.38582	7.06295	7.36162	5.07122	5.02388	5.03999	5.09638	3.89085	3.91004	4.01875	3.74001	3.73251	4.02126	4.25537	4.29518
1602.17	10.4666	8.81174	9.20292	8.43175	8.08869	7.37466	7.05022	7.34411	5.05043	5.0033	5.04761	5.0861	3.88659	3.91237	4.04603	3.74592	3.7444	4.02851	4.25662	4.29349
1603.73	10.4823	8.8299	9.1959	8.42717	8.11305	7.33986	7.05074	7.3147	5.05167	5.0043	5.06755	5.08231	3.88223	3.90611	4.05178	3.7549	3.76107	4.03979	4.25668	4.3017
1605.29	10.4837	8.83608	9.18942	8.41083	8.11548	7.3219	7.04934	7.30369	5.07018	5.02645	5.07847	5.07702	3.88099	3.8983	4.04333	3.76269	3.76535	4.045	4.26088	4.31226
1606.86	10.4625	8.82326	9.17378	8.39236	8.07476	7.34114	7.03906	7.30554	5.08169	5.04115	5.08791	5.07023	3.88429	3.89758	4.03468	3.76377	3.75514	4.04265	4.2672	4.3039
1608.42	10.437	8.80844	9.15739	8.37318	8.03459	7.37124	7.02154	7.30758	5.07117	5.03262	5.09446	5.06952	3.88812	3.90281	4.0289	3.76099	3.7443	4.03884	4.27429	4.27603
1609.98	10.4161	8.80276	9.14541	8.3522	8.03144	7.37642	7.01103	7.30431	5.05157	5.01675	5.08898	5.07166	3.88972	3.90406	4.02123	3.75894	3.7434	4.04068	4.28413	4.2584
1611.55	10.386	8.79553	9.12366	8.34783	8.03332	7.35944	7.01595	7.29745	5.04744	5.01155	5.07433	5.06833	3.89247	3.89991	4.0174	3.76084	3.7464	4.0496	4.29012	4.2695
1613.11	10.3684	8.79238	9.10927	8.36792	8.03197	7.34208	7.0263	7.291	5.0617	5.01425	5.06323	5.05352	3.89564	3.89444	4.02367	3.76321	3.74564	4.05445	4.2745	4.29257
1614.67	10.3701	8.79922	9.0937	8.38801	8.01852	7.33656	7.02796	7.29163	5.07366	5.0164	5.06094	5.03538	3.90049	3.89359	4.02859	3.76489	3.74578	4.0481	4.24829	4.30116
1616.23	10.3758	8.80759	9.07496	8.38329	7.99954	7.34116	7.02344	7.29517	5.07388	5.02331	5.06288	5.0306	3.90506	3.90389	4.02487	3.77317	3.74704	4.03885	4.23687	4.29654
1617.79	10.3729	8.80544	9.0727	8.36041	7.98901	7.33893	7.02232	7.29335	5.07201	5.03908	5.06516	5.04594	3.90311	3.91457	4.02297	3.78028	3.74861	4.03985	4.2307	4.29075
1619.35	10.3572	8.79645	9.08616	8.34457	7.98334	7.32202	7.01096	7.294	5.07466	5.05238	5.0626	5.05897	3.88855	3.92989	4.02093	3.78835	3.76078	4.06057	4.22515	4.30286
1620.91	10.3422	8.78681	9.0977	8.34246	7.98087	7.30545	6.98892	7.29333	5.08949	5.06965	5.05908	5.06951	3.87753	3.9523	4.02008	3.79828	3.77101	4.07667	4.23606	4.33292
1622.47	10.3399	8.77796	9.10147	8.3429	7.98738	7.29883	6.9841	7.28606	5.10686	5.08923	5.06171	5.08711	3.87828	3.96158	4.02096	3.8021	3.77825	4.06751	4.26295	4.35116
1624.03	10.3439	8.76841	9.10703	8.34811	8.00323	7.29301	7.00032	7.27487	5.10865	5.0908	5.07113	5.09079	3.87952	3.95526	4.01546	3.81069	3.78645	4.04913	4.28244	4.35809
1625.59	10.3409	8.76256	9.10639	8.36309	8.01164	7.29123	7.01624	7.26366	5.10142	5.08524	5.07875	5.08244	3.88311	3.94721	4.00024	3.81708	3.78825	4.04572	4.29113	4.36236
1627.15	10.3203	8.75795	9.10197	8.37352	8.01103	7.30515	7.0268	7.24828	5.0945	5.0813	5.08721	5.07278	3.91087	3.94074	3.98986	3.82112	3.79269	4.06802	4.29665	4.36335
1628.71	10.2995	8.75446	9.09583	8.36746	8.00664	7.32778	7.0409	7.23412	5.08719	5.08367	5.09468	5.07236	3.94311	3.93269	4.01066	3.83379	3.79622	4.09277	4.30222	4.36645
1630.26	10.2987	8.75525	9.08619	8.3522	8.00189	7.33204	7.04614	7.23833	5.07878	5.09284	5.09858	5.09112	3.95123	3.93201	4.05973	3.84338	3.79981	4.10056	4.30848	4.37062
1631.82	10.3099	8.76016	9.07366	8.34472	8.00033	7.31453	7.04533	7.27438	5.0784	5.10421	5.10685	5.10489	3.95155	3.945	4.08971	3.8624	3.81244	4.10909	4.31473	4.37339
1633.38	10.3176	8.76149	9.06427	8.35824	7.99737	7.2967	7.04556	7.3028	5.08355	5.12366	5.11109	5.11751	3.95369	3.96259	4.10413	3.88095	3.82032	4.11636	4.3263	4.37662
1634.93	10.3342	8.76586	9.07976	8.37813	8.01444	7.29424	7.04328	7.322	5.08862	5.14111	5.10341	5.13643	3.96716	3.97379	4.11604	3.8782	3.84013	4.13013	4.34168	4.38673
1636.49	10.3581	8.77573	9.10849	8.38865	8.04734	7.30357	7.04575	7.34439	5.09868	5.14251	5.09103	5.14591	3.98607	3.98133	4.1187	3.86191	3.86456	4.14916	4.35419	4.426
1638.04	10.3565	8.77832	9.11565	8.39661	8.05764	7.31879	7.0505	7.34937	5.11749	5.13802	5.08916	5.15493	3.99627	3.98763	4.11984	3.85268	3.87153	4.15731	4.37684	4.46768
1639.6	10.3367	8.78004	9.14302	8.40806	8.06593	7.35259	7.07217	7.34517	5.13316	5.13773	5.11862	5.166	4.00456	4.00015	4.12521	3.86935	3.87043	4.1643	4.39783	4.48048
1641.15	10.3209	8.78088	9.16473	8.43237	8.07318	7.38659	7.10857	7.34295	5.15016	5.14637	5.14539	5.18295	4.01282	4.02003	4.14309	3.89614	3.86861	4.16871	4.40662	4.48306
1642.71	10.3282	8.785	9.15024	8.46015	8.07248	7.38949	7.12209	7.35473	5.1712	5.158	5.14929	5.20944	4.03098	4.03635	4.16423	3.90244	3.88175	4.17232	4.41437	4.48686
1644.26	10.3522	8.79881	9.12543	8.46714	8.06917	7.38078	7.11943	7.37834	5.17692	5.16596	5.15688	5.22697	4.06587	4.05927	4.1755	3.88487	3.90706	4.18504	4.41887	4.51194
1645.81	10.3651	8.80701	9.11218	8.45933	8.06859	7.37652	7.11872	7.38675	5.17025	5.17199	5.16137	5.23237	4.08612	4.08462	4.19241	3.86707	3.92244	4.19746	4.42862	4.54818
1647.36	10.3653	8.8152	9.13294	8.44979	8.08482	7.38241	7.11932	7.38468	5.16439	5.17687	5.16724	5.23067	4.09299	4.09716	4.20554	3.86344	3.93326	4.21798	4.44279	4.55838
1648.92	10.3583	8.82313	9.16174	8.43958	8.10409	7.39635	7.11842	7.38189	5.16629	5.17991	5.17591	5.23305	4.09549	4.10005	4.20727	3.86372	3.94204	4.2386	4.45475	4.54604
1650.47	10.3342	8.82062	9.16647	8.42659	8.10878	7.40766	7.11801	7.37579	5.17338	5.18227	5.18672	5.25654	4.08943	4.10051	4.20943	3.86177	3.94826	4.24476	4.47335	4.5322
1652.02	10.279	8.80649	9.16286	8.40694	8.11481	7.41322	7.12432	7.36235	5.17862	5.17928	5.206	5.27219	4.06997	4.09361	4.2105	3.85427	3.95266	4.24751	4.4862	4.52492
1653.57	10.2366	8.7911	9.15336	8.36143	8.11531	7.41527	7.12957	7.34962	5.17596	5.16062	5.21785	5.24607	4.05568	4.08136	4.21092	3.8467	3.95219	4.24683	4.48268	4.52131
1655.12	10.2169	8.7659	9.12861	8.31646	8.09318	7.41008	7.11412	7.33693	5.17003	5.1369	5.20177	5.19713	4.05325	4.0761	4.20921	3.84179	3.93724	4.23743	4.47339	4.51852
1656.67	10.1983	8.73197	9.09161	8.30714	8.05718	7.39486	7.07378	7.32199	5.16354	5.1144	5.17021	5.1644	4.05169	4.07916	4.2018	3.83288	3.91742	4.22474	4.4708	4.52125
1658.22	10.1864	8.71463	9.05441	8.31004	8.03328	7.37249	7.03547	7.31125	5.15188	5.07917	5.15255	5.14111	4.04594	4.08153	4.18897	3.82342	3.90452	4.22221	4.46888	4.52424
1659.77	10.1694	8.70055	8.97969	8.30852	8.00445	7.33654	7.0072	7.29633	5.14532	5.05542	5.13925	5.12113	4.02964	4.0621	4.17386	3.80738	3.88848	4.22637	4.46372	4.51093
1661.32	10.1474	8.68838	8.91588	8.29574	7.97269	7.29809	6.98021	7.28519	5.1452	5.04815	5.12797	5.10291	4.01183	4.024	4.1475	3.78444	3.87514	4.22904	4.44655	4.4791
1662.86	10.0926	8.67666	8.90172	8.27786	7.93801	7.27813	6.95727	7.2674	5.14512	5.04444	5.12034	5.07905	3.99897	3.99608	4.11353	3.76113	3.86144	4.22086	4.41419	4.45101
1664.41	9.98979	8.65627	8.89571	8.25327	7.89479	7.2706	6.92799	7.22254	5.13339	5.04146	5.11168	5.05938	3.98448	3.97763	4.09563	3.72778	3.84417	4.20274	4.39055	4.40273
1665.96	9.93534	8.6358	8.88824	8.20692	7.86916	7.2647	6.9002	7.19463	5.09168	5.02508	5.10063	5.0261	3.96761	3.96139	4.08777	3.69938	3.82876	4.19257	4.37693	4.34221
1667.51	9.91818	8.6037	8.85943	8.15496	7.86367	7.23509	6.87715	7.1614	5.05144	5.00284	5.07186	4.98227	3.943	3.93754	4.07782	3.67726	3.80632	4.17158	4.36346	4.31641
1669.05	9.90099	8.56157	8.81977	8.1096	7.85963	7.18416	6.84608	7.12171	5.03418	4.97304	5.03836	4.95124	3.91528	3.90051	4.06167	3.65015	3.7812	4.1414	4.34214	4.30596
1670.6	9.8766	8.51303	8.77829	8.06393	7.83527	7.1513	6.81941	7.09925	5.02158	4.92837	5.01879	4.92179	3.88933	3.87045	4.04069	3.63299	3.75238	4.11618	4.30238	4.29671
1672.14	9.83447	8.44238	8.70881	8.02034	7.77405	7.12897	6.78934	7.07823	5.00323	4.8874	4.99414	4.89381	3.85517	3.83699	4.01174	3.61956	3.71512	4.08418	4.266	4.27401
1673.69	9.79094	8.38873	8.66341	7.97353	7.71495	7.10456	6.7528	7.05164	4.97512	4.84614	4.9641	4.86471	3.82117	3.8016	3.9675	3.6012	3.6834	4.0626	4.24557	4.23101
1675.23	9.74054	8.36956	8.64779	7.92769	7.67242	7.07306	6.716	6.99027	4.94326	4.80533	4.9072	4.82877	3.78082	3.77855	3.92142	3.56566	3.65751	4.04478	4.22884	4.19164
1676.78	9.68329	8.3571	8.62816	7.88479	7.63454	7.02943	6.6678	6.90726	4.90685	4.77139	4.83723	4.79157	3.73493	3.74821	3.88971	3.50868	3.63336	4.01645	4.20407	4.14681
1678.32	9.64239	8.3278	8.60322	7.83904	7.60507	6.98171	6.62197	6.85785	4.86309	4.73646	4.80652	4.74924	3.70424	3.72043	3.86464	3.46769	3.6049	3.98416	4.15104	4.09779
1679.87	9.59674	8.26721	8.54665	7.81015	7.57485	6.922	6.58877	6.82968	4.82686	4.70462	4.8013	4.70981	3.68499	3.68056	3.83355	3.44456	3.5668	3.92936	4.09601	4.05852
1681.41	9.5525	8.20716	8.48607	7.79509	7.53798	6.86553	6.55861	6.80381	4.79394	4.67014	4.7939	4.67724	3.6654	3.62765	3.7821	3.42796	3.53953	3.87425	4.06379	4.02328
1682.95	9.49973	8.17085	8.44498	7.7796	7.47726	6.83617	6.52189	6.76581	4.76215	4.63444	4.75935	4.64245	3.6304	3.59848	3.72519	3.41989	3.51565	3.83716	4.03552	3.99104
1684.49	9.42519	8.14092	8.40879	7.75211	7.39633	6.81951	6.47328	6.71803	4.73954	4.60919	4.70226	4.61213	3.58218	3.57229	3.69219	3.41189	3.48772	3.8052	4.00828	3.95281
1686.04	9.38173	8.10783	8.37604	7.68786	7.35071	6.80032	6.42739	6.68372	4.70665	4.58393	4.65972	4.57661	3.54997	3.54779	3.67344	3.39997	3.4594	3.77746	3.96935	3.91075
1687.58	9.33564	8.05977	8.339	7.62556	7.33042	6.76377	6.39345	6.6483	4.67671	4.5559	4.62737	4.53877	3.52756	3.52913	3.65403	3.36413	3.4104	3.7422	3.92052	3.87324
1689.12	9.29255	8.01031	8.29927	7.58209	7.31553	6.72022	6.36637	6.60996	4.65759	4.51894	4.5981	4.50812	3.50588	3.50388	3.62285	3.30903	3.37813	3.70844	3.87961	3.82887
1690.66	9.28172	7.97463	8.25239	7.54079	7.29695	6.68448	6.34942	6.57333	4.63697	4.47417	4.56964	4.46646	3.47934	3.47972	3.58326	3.27074	3.37269	3.68571	3.84187	3.79445
1692.2	9.27587	7.94277	8.1844	7.51643	7.26148	6.64001	6.33383	6.52723	4.60697	4.44318	4.5297	4.42802	3.43716	3.45174	3.55609	3.23693	3.36232	3.65696	3.80499	3.77441
1693.74	9.27326	7.91508	8.13953	7.49992	7.23628	6.60281	6.31652	6.49916	4.55637	4.42159	4.50157	4.39655	3.40624	3.41986	3.5397	3.20783	3.34084	3.62971	3.76855	3.7539
1695.28	9.23535	7.87599	8.11702	7.48318	7.22073	6.58357	6.29545	6.4884	4.51066	4.39869	4.48695	4.36335	3.3859	3.38888	3.52625	3.18392	3.28447	3.59033	3.73133	3.73023
1696.82	9.17374	7.83322	8.0959	7.45646	7.20087	6.56775	6.26071	6.47765	4.48665	4.37131	4.47543	4.3357	3.36408	3.35464	3.50897	3.15869	3.23094	3.54475	3.6952	3.68686
1698.35	9.14082	7.81417	8.07594	7.40996	7.17275	6.54829	6.22573	6.46167	4.467	4.33926	4.46654	4.30589	3.34489	3.3251	3.48166	3.14157	3.20868	3.52126	3.65713	3.63942
1699.89	9.10359	7.80842	8.02671	7.36728	7.10766	6.506	6.17515	6.42177	4.45364	4.31151	4.44603	4.27816	3.32076	3.29848	3.45415	3.12971	3.19304	3.50927	3.62508	3.61114
1701.43	9.0667	7.7988	7.98544	7.3299	7.04951	6.45903	6.11667	6.38538	4.4326	4.28884	4.42606	4.25268	3.29353	3.27658	3.42081	3.11809	3.18216	3.49622	3.60268	3.59243
1702.97	9.03	7.75698	7.96947	7.29307	7.02355	6.42429	6.08193	6.35996	4.4051	4.26923	4.40183	4.22432	3.2536	3.26714	3.38642	3.10316	3.15439	3.46799	3.58397	3.57625
1704.5	8.99136	7.68737	7.94958	7.25942	7.00449	6.38753	6.05002	6.32838	4.38143	4.25222	4.36228	4.20974	3.20691	3.25565	3.36335	3.08357	3.128	3.42782	3.57259	3.56062
1706.04	8.97729	7.63999	7.92423	7.22148	6.98995	6.36006	6.02871	6.30799	4.34741	4.23364	4.33163	4.19523	3.19445	3.24882	3.34	3.06828	3.12513	3.39816	3.55516	3.54474
1707.57	8.94927	7.60371	7.87761	7.19978	6.96092	6.33946	6.02582	6.29118	4.32522	4.22035	4.29604	4.17934	3.20788	3.23454	3.32383	3.05646	3.11935	3.367	3.53188	3.5261
1709.11	8.92202	7.57728	7.83596	7.20219	6.93431	6.32225	6.02715	6.27455	4.31993	4.21074	4.26178	4.17184	3.22249	3.20712	3.30942	3.04707	3.11388	3.34143	3.5154	3.50085
1710.64	8.91417	7.55905	7.82642	7.2125	6.92409	6.30338	6.02659	6.25594	4.31457	4.19899	4.23828	4.15839	3.21789	3.19256	3.29148	3.03884	3.10084	3.331	3.50107	3.47979
1712.18	8.89315	7.52811	7.82792	7.20963	6.9087	6.27255	6.01162	6.22986	4.30142	4.1872	4.21486	4.15018	3.19116	3.17766	3.28159	3.01983	3.08436	3.32208	3.48905	3.46744
1713.71	8.86638	7.50987	7.82014	7.17666	6.89234	6.26072	5.99278	6.20867	4.26717	4.17063	4.20065	4.14393	3.16655	3.16427	3.26589	3.00782	3.0816	3.31611	3.4759	3.45773
1715.25	8.81344	7.5022	7.77417	7.14516	6.85655	6.27714	5.96662	6.1886	4.23744	4.15781	4.18787	4.13077	3.14139	3.15895	3.25127	3.00959	3.08251	3.30441	3.46158	3.4461
1716.78	8.76066	7.4948	7.72424	7.12547	6.81672	6.2971	5.92635	6.1709	4.2296	4.1489	4.17316	4.11874	3.11824	3.15165	3.2433	3.01271	3.07787	3.2893	3.44907	3.42879
1718.31	8.75185	7.48654	7.71897	7.10014	6.80386	6.29669	5.9099	6.1625	4.22695	4.13695	4.15895	4.10451	3.11063	3.14735	3.2343	3.00798	3.05484	3.27717	3.42341	3.41531
1719.85	8.7583	7.47265	7.73389	7.09084	6.80304	6.26276	5.91347	6.15313	4.21631	4.12743	4.13786	4.09194	3.11036	3.1384	3.22893	2.98812	3.01993	3.25898	3.40364	3.41334
1721.38	8.7635	7.46001	7.74695	7.09381	6.80004	6.22756	5.9178	6.14313	4.19176	4.10615	4.12453	4.07249	3.11057	3.12715	3.22045	2.97158	2.99869	3.2476	3.39335	3.41683
1722.91	8.75621	7.43321	7.73123	7.09888	6.77076	6.19813	5.91746	6.12042	4.17205	4.08558	4.12452	4.04553	3.09869	3.1176	3.21016	2.96498	2.97826	3.23955	3.37925	3.41798
1724.44	8.74021	7.39623	7.69741	7.08982	6.73075	6.1637	5.90947	6.09117	4.16821	4.0848	4.12759	4.0391	3.0785	3.09882	3.20212	2.95632	2.96425	3.22892	3.37558	3.39943
1725.97	8.72107	7.3823	7.67845	7.05449	6.72196	6.14953	5.90002	6.08119	4.16848	4.08823	4.12627	4.04882	3.06697	3.08664	3.19138	2.94836	2.96768	3.22665	3.371	3.37646
1727.5	8.6769	7.37584	7.65522	7.03774	6.72106	6.14898	5.8738	6.07442	4.17193	4.08955	4.11102	4.05794	3.05809	3.08243	3.18652	2.93676	2.97917	3.2247	3.36353	3.36713
1729.03	8.64558	7.37355	7.63721	7.04422	6.72014	6.14657	5.84101	6.07127	4.1717	4.0836	4.09451	4.04713	3.05242	3.07829	3.19081	2.92577	2.98246	3.22109	3.35943	3.35676
1730.56	8.65861	7.37332	7.62257	7.04683	6.70818	6.13938	5.83182	6.07124	4.16927	4.07428	4.08137	4.01232	3.04767	3.07378	3.19681	2.91992	2.96546	3.21073	3.35172	3.35014
1732.09	8.68523	7.36916	7.59763	7.03397	6.67929	6.12486	5.83005	6.06723	4.17047	4.06069	4.06696	3.98981	3.0388	3.06424	3.19055	2.91648	2.94716	3.19288	3.34892	3.34386
1733.62	8.68948	7.36545	7.58833	6.99743	6.6592	6.11163	5.8295	6.06562	4.16601	4.03421	4.06508	3.98485	3.03268	3.05708	3.16624	2.91694	2.94419	3.18229	3.34384	3.3353
1735.15	8.63114	7.34285	7.58424	6.96566	6.63352	6.09538	5.8196	6.05823	4.16276	4.01861	4.06018	3.98477	3.0202	3.05897	3.1467	2.92107	2.94355	3.16183	3.33478	3.32939
1736.67	8.56961	7.31807	7.57713	6.94453	6.6122	6.07945	5.79921	6.04645	4.15899	4.01581	4.05344	3.98086	3.01039	3.06404	3.1304	2.92332	2.93973	3.14357	3.3295	3.31268
1738.2	8.56479	7.30919	7.5646	6.92401	6.60594	6.07186	5.78948	6.02371	4.14863	4.0092	4.04702	3.95984	3.00785	3.06394	3.10746	2.91203	2.9286	3.1441	3.31767	3.29679
1739.73	8.58023	7.29873	7.54647	6.91859	6.59485	6.06333	5.79136	5.97927	4.13437	4.00339	4.02784	3.94069	2.99583	3.0541	3.10002	2.88269	2.91604	3.14745	3.30412	3.29028
1741.25	8.58802	7.28959	7.53904	6.92503	6.59257	6.05313	5.79613	5.95826	4.10926	3.99123	4.01129	3.928	2.99117	3.04113	3.10441	2.86166	2.9075	3.14859	3.2888	3.28574
1742.78	8.56568	7.27927	7.5354	6.93033	6.60427	6.02677	5.78122	5.96243	4.0888	3.98076	3.99369	3.9134	2.98715	3.02605	3.10357	2.85691	2.89693	3.13878	3.27061	3.28637
1744.31	8.53604	7.26839	7.53061	6.91472	6.61611	5.99183	5.7463	5.96806	4.08395	3.97135	3.97685	3.90158	2.98146	3.00678	3.08228	2.85702	2.89167	3.12601	3.26158	3.29448
1745.83	8.52787	7.25893	7.52388	6.88309	6.61189	5.99251	5.73069	5.96034	4.08539	3.95755	3.96728	3.88697	2.98019	2.99252	3.04954	2.85344	2.89362	3.12275	3.25918	3.30241
1747.35	8.52535	7.24503	7.4998	6.87109	6.58965	6.02446	5.72568	5.93115	4.08749	3.95493	3.95042	3.87577	2.9727	2.97147	3.03893	2.83822	2.89629	3.12225	3.25797	3.30087
1748.88	8.5205	7.2358	7.48683	6.86414	6.57401	6.04619	5.72092	5.91241	4.08372	3.95573	3.93964	3.87484	2.96758	2.9523	3.04938	2.82941	2.89262	3.12193	3.25041	3.29073
1750.4	8.48931	7.23229	7.49098	6.85373	6.57693	6.01791	5.71728	5.91709	4.07649	3.9538	3.93493	3.87693	2.9597	2.95065	3.05843	2.82985	2.87101	3.11327	3.23676	3.27689
1751.93	8.44343	7.22719	7.49494	6.84051	6.58179	5.95867	5.70911	5.92573	4.06455	3.94554	3.92827	3.8758	2.94683	2.9545	3.05642	2.82906	2.85368	3.09906	3.23099	3.25087
1753.45	8.42102	7.21558	7.49018	6.81116	6.56999	5.9351	5.70225	5.92429	4.04455	3.92498	3.92161	3.86329	2.94162	2.95596	3.04674	2.82708	2.85036	3.08869	3.22486	3.22334
1754.97	8.39894	7.18573	7.45303	6.79061	6.53166	5.94433	5.69904	5.91064	4.0281	3.91233	3.90821	3.84903	2.94128	2.94881	3.03812	2.81495	2.84757	3.06259	3.21669	3.22071
1756.49	8.38406	7.1608	7.41884	6.77888	6.4998	5.95005	5.69377	5.89626	4.01072	3.90949	3.89781	3.84047	2.94171	2.93626	3.02773	2.8032	2.84302	3.04407	3.21749	3.23699
1758.02	8.3824	7.14984	7.4051	6.76872	6.4871	5.93214	5.67407	5.87785	3.99404	3.90446	3.89451	3.8305	2.93057	2.92158	3.01669	2.79506	2.8216	3.04661	3.22281	3.24359
1759.54	8.3818	7.13657	7.38882	6.7592	6.47474	5.89538	5.63451	5.85017	3.98959	3.88502	3.89105	3.82704	2.90822	2.89904	3.01263	2.78494	2.80352	3.05178	3.22136	3.22015
1761.06	8.37742	7.12191	7.36955	6.73901	6.46818	5.87693	5.60595	5.8326	3.9887	3.84695	3.88722	3.83664	2.89758	2.88593	3.00949	2.77564	2.79961	3.05289	3.20078	3.18696
1762.58	8.35933	7.0933	7.34167	6.72194	6.46264	5.87669	5.60389	5.81622	3.98432	3.82669	3.87246	3.84968	2.88119	2.89491	3.00135	2.75671	2.78963	3.03847	3.1731	3.1777
1764.1	8.33387	7.0647	7.31291	6.70384	6.45844	5.87687	5.61129	5.80612	3.96736	3.83614	3.85969	3.84257	2.866	2.91131	2.98324	2.74146	2.77948	3.0233	3.16239	3.18346
1765.62	8.29765	7.0428	7.28194	6.68162	6.44123	5.86462	5.60561	5.806	3.94697	3.84916	3.85528	3.80517	2.85841	2.91506	2.96443	2.74758	2.76797	3.02111	3.1642	3.18707
1767.14	8.2459	7.01495	7.24319	6.67326	6.39901	5.83632	5.57526	5.80268	3.94345	3.84209	3.84471	3.77494	2.84598	2.90589	2.96097	2.76369	2.75801	3.02174	3.16377	3.17153
1768.66	8.21613	6.99958	7.22739	6.67211	6.37798	5.81827	5.55137	5.7971	3.94876	3.81044	3.8365	3.76282	2.84073	2.89545	2.96831	2.76896	2.75557	3.0171	3.15185	3.14131
1770.18	8.1964	6.98893	7.2212	6.66966	6.3803	5.81156	5.53962	5.76474	3.95076	3.78712	3.81452	3.75337	2.83727	2.88125	2.97113	2.76579	2.75872	2.99757	3.13423	3.12197
1771.69	8.18084	6.97905	7.2153	6.65627	6.38356	5.80548	5.5264	5.72887	3.941	3.78169	3.79125	3.74765	2.8337	2.86295	2.95314	2.75956	2.75634	2.9775	3.12254	3.10771
1773.21	8.17819	6.96866	7.21639	6.63549	6.37659	5.80281	5.52087	5.72036	3.92431	3.77785	3.79213	3.7469	2.83138	2.85405	2.92222	2.73788	2.74375	2.96959	3.11033	3.09781
1774.73	8.18007	6.94798	7.22342	6.61292	6.36533	5.79922	5.53109	5.71652	3.90984	3.77618	3.80983	3.7464	2.82509	2.85758	2.90839	2.70141	2.73087	2.95966	3.10128	3.10242
1776.25	8.17543	6.93644	7.22229	6.56989	6.35478	5.79204	5.54037	5.71081	3.88862	3.77187	3.8164	3.74182	2.82136	2.86136	2.90886	2.67937	2.72207	2.95219	3.09877	3.11406
1777.76	8.14308	6.93029	7.20041	6.53441	6.33508	5.77187	5.52843	5.69682	3.87094	3.76781	3.78911	3.73509	2.81982	2.86289	2.90884	2.67425	2.70855	2.94253	3.09629	3.11528
1779.28	8.10036	6.92134	7.17267	6.5386	6.31108	5.74382	5.50149	5.67994	3.86515	3.76688	3.75402	3.72861	2.81745	2.86596	2.90949	2.67026	2.69909	2.93145	3.0919	3.08913
1780.79	8.07625	6.90793	7.15609	6.56281	6.2922	5.7246	5.47895	5.66638	3.85982	3.7667	3.74611	3.71362	2.81333	2.86239	2.91479	2.66952	2.69342	2.92741	3.08075	3.05771
1782.31	8.05568	6.87801	7.13709	6.56626	6.26006	5.70834	5.45049	5.64571	3.85047	3.76287	3.75243	3.69669	2.80525	2.83958	2.91189	2.67505	2.68779	2.93027	3.06961	3.05431
1783.82	8.0379	6.85495	7.12403	6.53445	6.23689	5.69075	5.42423	5.62997	3.83419	3.74927	3.74868	3.6873	2.79963	2.81574	2.89674	2.6763	2.69179	2.93032	3.06017	3.0694
1785.34	8.03043	6.84798	7.11366	6.50123	6.22933	5.67101	5.42364	5.61788	3.81967	3.73276	3.72835	3.68004	2.79568	2.80427	2.8819	2.67075	2.71065	2.91225	3.0467	3.07476
1786.85	8.02744	6.84249	7.09937	6.48287	6.22382	5.65184	5.44028	5.60415	3.81082	3.71688	3.70844	3.67225	2.79001	2.79289	2.87208	2.66534	2.71962	2.88753	3.03732	3.06425
1788.36	8.00594	6.82799	7.08034	6.46232	6.21367	5.64069	5.44163	5.59493	3.80152	3.69667	3.70011	3.65804	2.78074	2.78585	2.86152	2.66401	2.70103	2.88029	3.03714	3.05105
1789.88	7.93739	6.79815	7.03151	6.44431	6.18572	5.63169	5.4091	5.58449	3.79204	3.68535	3.6966	3.64334	2.74984	2.7913	2.85754	2.66724	2.67462	2.87568	3.03858	3.04624
1791.39	7.88574	6.77404	6.99277	6.42865	6.16055	5.6245	5.36898	5.57531	3.77704	3.68942	3.69481	3.63993	2.72515	2.79844	2.8594	2.66618	2.66387	2.87031	3.02836	3.04717
1792.9	7.87925	6.76358	6.98948	6.41574	6.14791	5.62846	5.34871	5.57229	3.76106	3.69641	3.69243	3.64147	2.72439	2.78867	2.86054	2.65298	2.65715	2.86076	3.00649	3.04472
1794.41	7.87879	6.75279	6.99513	6.3992	6.13703	5.64063	5.3356	5.57113	3.75543	3.69562	3.68695	3.6367	2.72917	2.76392	2.85652	2.63558	2.65111	2.84816	2.99149	3.0252
1795.93	7.88155	6.73682	6.99122	6.3699	6.12962	5.6341	5.3268	5.56177	3.7572	3.69232	3.67786	3.61015	2.72806	2.75071	2.84567	2.62711	2.64521	2.84544	2.98425	2.99714
1797.44	7.89099	6.69352	6.96917	6.34789	6.12421	5.58351	5.31527	5.5426	3.75434	3.68716	3.66534	3.57635	2.72418	2.74965	2.83091	2.62438	2.63864	2.85863	2.97824	2.98799
1798.95	7.89345	6.65512	6.94461	6.33112	6.11959	5.53492	5.30264	5.52371	3.7347	3.67012	3.65515	3.56731	2.71904	2.7515	2.80645	2.62158	2.63629	2.87001	2.9795	2.99722
1800.46	7.84597	6.64116	6.92359	6.31457	6.11247	5.52812	5.29467	5.50951	3.70961	3.64971	3.64516	3.57573	2.71167	2.74954	2.78085	2.60999	2.63421	2.86464	2.98896	3.00401
1801.97	7.75329	6.62834	6.8992	6.3032	6.09805	5.5349	5.28156	5.49454	3.69946	3.6396	3.63032	3.58119	2.70349	2.73381	2.77666	2.59296	2.63211	2.85142	2.9933	2.99877
1803.48	7.7164	6.62046	6.88342	6.28432	6.07605	5.53684	5.27159	5.48213	3.69891	3.62593	3.62407	3.57636	2.69857	2.72151	2.78809	2.5891	2.6248	2.84109	2.98651	2.98659
1804.98	7.72973	6.59771	6.85786	6.27446	6.04019	5.53193	5.25535	5.47603	3.69714	3.6171	3.61893	3.56643	2.70552	2.71581	2.79534	2.59569	2.60844	2.81857	2.97535	2.97487
1806.49	7.74688	6.57683	6.83353	6.28595	6.00921	5.52424	5.23462	5.4727	3.68515	3.61233	3.61175	3.554	2.71289	2.71042	2.79586	2.59796	2.59556	2.79711	2.96601	2.96545
1808	7.74074	6.5819	6.8261	6.30314	5.99914	5.5083	5.22883	5.46584	3.6668	3.60493	3.6019	3.5299	2.70841	2.70601	2.79828	2.58166	2.58371	2.79228	2.95987	2.95892
1809.51	7.71966	6.59973	6.82362	6.29469	5.99536	5.48299	5.23314	5.45343	3.66035	3.59906	3.58826	3.50995	2.69881	2.701	2.79545	2.55665	2.5746	2.79027	2.95558	2.94994
1811.02	7.70852	6.60719	6.82208	6.25382	5.99081	5.46376	5.23849	5.44112	3.66898	3.58867	3.58163	3.51444	2.69003	2.69864	2.78353	2.54808	2.56917	2.78691	2.94791	2.93629
1812.52	7.68967	6.59723	6.8153	6.22306	5.97477	5.45167	5.22527	5.41948	3.67259	3.57721	3.58476	3.53101	2.67009	2.70039	2.7717	2.54851	2.56311	2.774	2.93628	2.92549
1814.03	7.66942	6.57804	6.80692	6.2188	5.96022	5.44194	5.19981	5.39963	3.66057	3.56292	3.58908	3.53297	2.65154	2.70331	2.7561	2.54805	2.56133	2.75961	2.92653	2.91867
1815.53	7.66905	6.5496	6.79847	6.21866	5.96039	5.44557	5.19175	5.3925	3.64532	3.5465	3.58682	3.51025	2.65471	2.70424	2.7354	2.54928	2.55877	2.7536	2.91756	2.91354
1817.04	7.67811	6.50943	6.78225	6.22255	5.96118	5.46224	5.20105	5.38039	3.64334	3.53911	3.58085	3.48506	2.66814	2.69843	2.73275	2.55191	2.55656	2.74969	2.90907	2.90844
1818.55	7.6819	6.49083	6.77097	6.23527	5.96041	5.47089	5.20727	5.37341	3.65725	3.5355	3.57855	3.47533	2.67242	2.69507	2.74572	2.55283	2.55617	2.7473	2.90275	2.90301
1820.05	7.65177	6.50771	6.74296	6.23873	5.94552	5.45962	5.18735	5.35349	3.66776	3.53363	3.56336	3.47422	2.65525	2.67731	2.75529	2.55185	2.55252	2.74613	2.89906	2.90148
1821.55	7.61054	6.53003	6.71161	6.20332	5.92318	5.44093	5.15487	5.32947	3.65579	3.53588	3.54092	3.47205	2.63256	2.64328	2.75138	2.54952	2.55268	2.74325	2.8958	2.90702
1823.06	7.59036	6.52526	6.71209	6.146	5.90225	5.41451	5.14658	5.32752	3.63107	3.54078	3.52973	3.46473	2.62225	2.62632	2.74304	2.53829	2.55754	2.7329	2.87526	2.9152
1824.56	7.5641	6.49692	6.72849	6.12415	5.86757	5.3741	5.16182	5.33374	3.61827	3.54067	3.52097	3.45718	2.61759	2.61782	2.73393	2.51954	2.56149	2.71296	2.85029	2.90495
1826.07	7.5453	6.47663	6.73625	6.13188	5.84964	5.35078	5.17322	5.33265	3.60974	3.5297	3.51804	3.44506	2.61528	2.61193	2.71186	2.50726	2.55222	2.70236	2.84934	2.8746
1827.57	7.5254	6.46619	6.69953	6.13424	5.85401	5.35891	5.16434	5.3123	3.60363	3.52045	3.52347	3.42481	2.61475	2.61233	2.69357	2.49567	2.52653	2.70121	2.86382	2.85826
1829.07	7.50459	6.45528	6.65112	6.11233	5.8618	5.37369	5.14571	5.288	3.60584	3.5168	3.52841	3.41458	2.61346	2.61487	2.69522	2.4857	2.51447	2.70054	2.87218	2.85551
1830.57	7.50187	6.44243	6.64901	6.07547	5.86511	5.3713	5.12893	5.27883	3.60996	3.5092	3.51978	3.42331	2.60523	2.6117	2.70198	2.48735	2.51707	2.70003	2.86896	2.85335
1832.07	7.50772	6.40984	6.66712	6.06139	5.8635	5.35019	5.10421	5.2707	3.60502	3.50424	3.49359	3.43807	2.58612	2.60446	2.69942	2.49472	2.5182	2.69615	2.86356	2.85292
1833.57	7.51046	6.38756	6.67946	6.07296	5.85706	5.3315	5.08162	5.26622	3.58011	3.50249	3.47575	3.42791	2.57438	2.59714	2.68059	2.49178	2.51689	2.69487	2.85	2.84984
1835.07	7.50533	6.38524	6.65022	6.08256	5.84136	5.31955	5.07477	5.26409	3.55563	3.50097	3.46783	3.38948	2.57667	2.59073	2.66465	2.46994	2.51401	2.69804	2.82257	2.8479
1836.58	7.49473	6.38418	6.6016	6.07285	5.81968	5.30924	5.07507	5.26027	3.54858	3.49225	3.45709	3.36989	2.5808	2.58504	2.66259	2.45015	2.50884	2.70057	2.80604	2.84224
1838.07	7.47179	6.37854	6.58691	6.05064	5.80124	5.29433	5.07016	5.25618	3.54731	3.47423	3.44564	3.38357	2.5782	2.58226	2.66238	2.44538	2.49593	2.69666	2.80683	2.83401
1839.57	7.41094	6.37227	6.57549	6.04195	5.7842	5.26432	5.05565	5.24922	3.54233	3.46039	3.42227	3.40219	2.56607	2.58453	2.66086	2.44364	2.48135	2.67662	2.8111	2.82406
1841.07	7.36469	6.36433	6.5638	6.05441	5.77283	5.23826	5.04194	5.23989	3.52433	3.44902	3.40693	3.39677	2.55559	2.58752	2.65578	2.44364	2.47689	2.6588	2.81617	2.80409
1842.57	7.35513	6.35509	6.55268	6.06387	5.75126	5.22567	5.03452	5.21651	3.5076	3.43981	3.42061	3.36627	2.54155	2.58194	2.65112	2.44799	2.47854	2.64955	2.82199	2.79057
1844.07	7.35174	6.34672	6.54095	6.04684	5.72007	5.21527	5.02501	5.18243	3.51316	3.43822	3.44515	3.34352	2.52209	2.56766	2.6489	2.45166	2.47613	2.64101	2.82406	2.7918
1845.57	7.35035	6.3331	6.53569	6.01169	5.71514	5.20708	5.01332	5.16335	3.5327	3.43837	3.44749	3.3378	2.52051	2.55789	2.64528	2.44836	2.4583	2.63778	2.81386	2.79483
1847.06	7.35455	6.28635	6.54176	5.98629	5.73172	5.20035	4.98451	5.15298	3.539	3.43367	3.42717	3.33559	2.5427	2.54502	2.63814	2.4419	2.43811	2.63944	2.79747	2.78896
1848.56	7.35424	6.24702	6.54242	5.96985	5.74081	5.19584	4.95615	5.14629	3.52336	3.42015	3.4074	3.3258	2.55814	2.53307	2.62162	2.43745	2.43468	2.64039	2.78307	2.7735
1850.06	7.33293	6.23049	6.52133	5.95493	5.71484	5.18658	4.95576	5.14905	3.50723	3.40463	3.39044	3.30626	2.54143	2.52954	2.60553	2.43358	2.43759	2.62439	2.76607	2.76113
1851.55	7.2977	6.21159	6.48887	5.93986	5.67178	5.17329	4.97094	5.15866	3.49384	3.38946	3.36863	3.29338	2.51214	2.52718	2.60009	2.42951	2.43542	2.59518	2.75511	2.75913
1853.05	7.2727	6.20367	6.46378	5.91456	5.65301	5.16531	4.97555	5.15434	3.47034	3.3701	3.36194	3.29813	2.5018	2.525	2.59566	2.41819	2.41374	2.5843	2.76029	2.76186
1854.55	7.24369	6.21542	6.43392	5.88777	5.64166	5.15261	4.9536	5.12329	3.45597	3.35442	3.36882	3.30806	2.50492	2.51811	2.58674	2.39757	2.38712	2.58688	2.77111	2.75811
1856.04	7.22314	6.2253	6.40797	5.85347	5.63427	5.14055	4.92261	5.09518	3.449	3.33957	3.37461	3.30097	2.50776	2.50822	2.56493	2.38529	2.3886	2.58901	2.77281	2.74383
1857.53	7.2167	6.19258	6.39227	5.82198	5.63077	5.13347	4.8973	5.07953	3.43889	3.32621	3.36471	3.27398	2.49915	2.49686	2.54252	2.38098	2.40909	2.5834	2.76607	2.73129
1859.03	7.20895	6.12887	6.37894	5.81988	5.62381	5.12213	4.87036	5.05826	3.43148	3.32258	3.34254	3.24892	2.48289	2.48197	2.54434	2.37699	2.42028	2.57521	2.76124	2.72404
1860.52	7.20184	6.108	6.36996	5.83612	5.61435	5.11054	4.85575	5.04669	3.42639	3.32252	3.32395	3.23357	2.47475	2.47275	2.56413	2.36982	2.41474	2.57206	2.75236	2.71671
1862.02	7.17792	6.11513	6.35673	5.83954	5.59499	5.09919	4.85532	5.03963	3.42258	3.32192	3.30425	3.22251	2.47209	2.47485	2.57461	2.35755	2.4058	2.57601	2.73918	2.70851
1863.51	7.14565	6.11997	6.34451	5.81673	5.57376	5.08883	4.85704	5.03344	3.4198	3.32202	3.29085	3.218	2.46828	2.47879	2.56689	2.34949	2.39463	2.57931	2.73456	2.69704
1865	7.10916	6.0954	6.33729	5.789	5.56162	5.07028	4.84731	5.02984	3.41695	3.32048	3.28964	3.21909	2.45874	2.47394	2.55469	2.3488	2.37834	2.56504	2.73255	2.68817
1866.49	7.06892	6.04648	6.32772	5.7823	5.55639	5.04398	4.82609	5.02773	3.40375	3.30721	3.29025	3.21883	2.44578	2.4639	2.54218	2.34972	2.36457	2.53539	2.72918	2.69554
1867.98	7.05227	6.02341	6.31268	5.79406	5.54933	5.03385	4.81318	5.0201	3.37652	3.28471	3.28779	3.21677	2.43708	2.4564	2.52657	2.34336	2.35372	2.52699	2.72201	2.71275
1869.48	7.05072	6.02734	6.2788	5.79032	5.53537	5.03949	4.8217	5.00608	3.35932	3.26944	3.28041	3.21607	2.42831	2.44969	2.51819	2.33111	2.34342	2.54509	2.70889	2.71604
1870.97	7.04798	6.03227	6.24615	5.74862	5.51818	5.04451	4.83382	4.99449	3.35772	3.2589	3.27087	3.21248	2.42126	2.44229	2.52264	2.32509	2.33896	2.55992	2.69455	2.70299
1872.46	7.0352	6.0225	6.22855	5.70071	5.497	5.02181	4.82272	4.98732	3.35896	3.24761	3.25509	3.2018	2.42037	2.43751	2.52914	2.32293	2.33832	2.54981	2.67463	2.69109
1873.95	7.01615	6.00721	6.21137	5.68581	5.47146	4.97573	4.79186	4.97536	3.36081	3.24212	3.23171	3.19242	2.42256	2.43685	2.5256	2.32194	2.33888	2.52998	2.65774	2.67615
1875.44	6.99874	5.99757	6.20005	5.68905	5.45666	4.95487	4.77543	4.96044	3.3605	3.23547	3.22174	3.19212	2.42183	2.43391	2.51414	2.32159	2.3392	2.51929	2.6497	2.65385
1876.93	6.97514	5.99006	6.1958	5.68713	5.45101	4.95926	4.76706	4.92705	3.35567	3.22934	3.22537	3.19502	2.4197	2.42137	2.50255	2.31828	2.33952	2.51515	2.64259	2.64362
1878.41	6.95048	5.98385	6.19236	5.66805	5.44466	4.96226	4.75786	4.89255	3.34901	3.22817	3.23061	3.1905	2.41626	2.4078	2.48447	2.313	2.33627	2.51183	2.63498	2.64686
1879.9	6.93245	5.96637	6.18088	5.64592	5.4283	4.96161	4.7438	4.87786	3.34215	3.22983	3.23351	3.17316	2.40924	2.40565	2.46455	2.29734	2.32582	2.50923	2.6264	2.65019
1881.39	6.91816	5.92857	6.163	5.63778	5.40452	4.96053	4.71452	4.8738	3.32583	3.23239	3.238	3.15427	2.4007	2.40976	2.46329	2.28306	2.31779	2.50726	2.61995	2.64192
1882.88	6.9066	5.91305	6.15533	5.63488	5.38992	4.95216	4.69776	4.87117	3.29989	3.2395	3.23427	3.13555	2.3969	2.40837	2.47338	2.27523	2.3158	2.50007	2.61831	2.6243
1884.37	6.88483	5.9212	6.15846	5.6305	5.38063	4.92549	4.69588	4.87963	3.28297	3.23697	3.20235	3.11336	2.39169	2.3945	2.47614	2.26367	2.31382	2.47942	2.61877	2.61249
1885.85	6.8656	5.92968	6.16074	5.62057	5.3743	4.90036	4.69442	4.88728	3.27936	3.20249	3.17055	3.1032	2.38575	2.37637	2.45768	2.2563	2.30161	2.46048	2.62145	2.60345
1887.34	6.85641	5.91105	6.149	5.60919	5.36859	4.89983	4.68501	4.87743	3.2794	3.16044	3.16204	3.11042	2.37508	2.3606	2.43295	2.24702	2.27686	2.4574	2.63081	2.59619
1888.82	6.84055	5.86476	6.12374	5.60495	5.35756	4.91181	4.66866	4.85865	3.27753	3.15655	3.15498	3.11645	2.3533	2.34228	2.42674	2.23603	2.26286	2.45983	2.63768	2.59494
1890.31	6.82844	5.84301	6.10483	5.60337	5.34952	4.91428	4.65543	4.84482	3.26875	3.17297	3.15238	3.10744	2.34335	2.33166	2.43166	2.23499	2.26254	2.46031	2.62402	2.59491
1891.79	6.81567	5.84497	6.07454	5.59697	5.33033	4.90007	4.64895	4.83491	3.26278	3.183	3.15352	3.09221	2.34347	2.34403	2.43283	2.23908	2.26229	2.45541	2.59677	2.5919
1893.28	6.80408	5.84819	6.04502	5.58285	5.3099	4.88706	4.64519	4.82658	3.26352	3.18351	3.1546	3.08437	2.34477	2.36185	2.42671	2.23985	2.25374	2.45069	2.57933	2.57846
1894.76	6.79726	5.83832	6.03066	5.56512	5.30212	4.87586	4.63792	4.81323	3.26533	3.18138	3.15166	3.08225	2.34296	2.3584	2.4199	2.24127	2.23214	2.44849	2.57026	2.56474
1896.25	6.78827	5.81637	6.01572	5.53888	5.29714	4.85728	4.6243	4.78972	3.25977	3.17307	3.14399	3.08161	2.33813	2.34065	2.4099	2.24398	2.21932	2.44323	2.56126	2.55676
1897.73	6.77392	5.79931	6.01155	5.50026	5.29189	4.84175	4.61591	4.78045	3.24364	3.16029	3.13568	3.07343	2.33561	2.33047	2.39213	2.2303	2.21503	2.43747	2.54865	2.54709
1899.21	6.7344	5.78052	6.01976	5.47836	5.27697	4.82532	4.59986	4.7929	3.23264	3.14588	3.11715	3.05544	2.33518	2.32655	2.38116	2.2026	2.20792	2.42047	2.53128	2.54363
1900.7	6.6958	5.76067	6.02595	5.48174	5.25814	4.80866	4.58121	4.80466	3.22852	3.12195	3.09984	3.04514	2.33326	2.32325	2.37933	2.187	2.21001	2.40373	2.52338	2.54837
1902.18	6.6863	5.74242	6.0103	5.48768	5.23955	4.80193	4.57921	4.79097	3.22207	3.09543	3.09278	3.03917	2.32223	2.32159	2.37736	2.18403	2.22178	2.39883	2.52916	2.5531
1903.66	6.68545	5.72149	5.97376	5.4727	5.21752	4.80038	4.58787	4.75925	3.20712	3.08701	3.08284	3.03251	2.30023	2.31999	2.37072	2.18272	2.22546	2.39436	2.53632	2.54994
1905.14	6.67929	5.70998	5.95136	5.43144	5.20814	4.79132	4.59005	4.74417	3.17882	3.08744	3.07809	3.03235	2.28738	2.31619	2.35498	2.18641	2.21254	2.39067	2.531	2.54019
1906.62	6.66236	5.70745	5.93396	5.40716	5.21792	4.76536	4.57335	4.73666	3.15922	3.0848	3.07574	3.03475	2.27998	2.29916	2.34444	2.19363	2.19839	2.37605	2.51568	2.53588
1908.1	6.64228	5.70592	5.91869	5.41901	5.22659	4.74137	4.5517	4.72962	3.15524	3.07347	3.07281	3.02793	2.27465	2.27997	2.34314	2.19081	2.1922	2.36055	2.50675	2.54056
1909.58	6.62332	5.6969	5.91106	5.43946	5.20889	4.72877	4.53728	4.72601	3.15547	3.06135	3.06466	3.00261	2.27508	2.27401	2.34363	2.17292	2.1866	2.35959	2.50788	2.54491
1911.06	6.60332	5.68033	5.90353	5.42784	5.17027	4.71791	4.51901	4.72086	3.15037	3.06134	3.04878	2.97645	2.27871	2.27111	2.34363	2.15913	2.18432	2.36684	2.50941	2.52983
1912.54	6.59053	5.67203	5.89559	5.3762	5.14779	4.7124	4.50639	4.71072	3.13408	3.06983	3.04258	2.97456	2.27653	2.26815	2.34109	2.16372	2.18887	2.36848	2.5054	2.49718
1914.02	6.57484	5.66869	5.8725	5.34004	5.13871	4.71	4.50169	4.68669	3.1251	3.07632	3.04801	2.98826	2.26591	2.25959	2.33873	2.17564	2.19374	2.35061	2.49836	2.4768
1915.5	6.55848	5.66446	5.85151	5.32752	5.13109	4.70794	4.49809	4.66356	3.12902	3.07913	3.05242	2.9898	2.25416	2.24939	2.3349	2.17882	2.18917	2.33325	2.49304	2.47042
1916.98	6.54427	5.64489	5.84925	5.31499	5.11855	4.709	4.48186	4.65553	3.13379	3.07938	3.03992	2.96976	2.2421	2.23885	2.3306	2.17318	2.17705	2.33249	2.48701	2.46788
1918.46	6.52577	5.6032	5.84798	5.30297	5.10101	4.71117	4.44748	4.6524	3.1316	3.06516	3.01172	2.94587	2.22447	2.22136	2.32526	2.16933	2.1693	2.3326	2.48077	2.47318
1919.94	6.51375	5.58371	5.84122	5.28127	5.09374	4.70686	4.42879	4.64809	3.12212	3.03527	2.99683	2.92661	2.21495	2.21403	2.31289	2.15881	2.16643	2.33188	2.46635	2.48312
1921.41	6.50794	5.58487	5.81429	5.27005	5.09833	4.68877	4.41806	4.62073	3.11632	3.01442	2.99019	2.90836	2.21139	2.22549	2.304	2.14159	2.16249	2.32489	2.44072	2.48688
1922.89	6.50204	5.58747	5.78704	5.27971	5.10313	4.67086	4.40929	4.59401	3.11404	3.00448	2.98418	2.90049	2.20941	2.23878	2.29514	2.13535	2.14936	2.31653	2.42597	2.4759
1924.36	6.48719	5.56969	5.76906	5.29187	5.08623	4.65124	4.41689	4.59335	3.11019	2.99567	2.97263	2.90634	2.20652	2.23719	2.28412	2.13637	2.12652	2.3118	2.42183	2.4641
1925.84	6.46424	5.5277	5.74134	5.29367	5.04585	4.62334	4.44041	4.60077	3.10434	2.9944	2.95245	2.91447	2.2017	2.22793	2.28166	2.13397	2.11699	2.3079	2.41804	2.46254
1927.32	6.45429	5.50553	5.727	5.29184	5.03025	4.61164	4.44818	4.60255	3.09346	2.99596	2.94453	2.90923	2.20025	2.22217	2.28133	2.13118	2.12614	2.30585	2.41795	2.4635
1928.79	6.44952	5.50544	5.72583	5.28362	5.03339	4.62371	4.42925	4.58509	3.08599	2.99944	2.95475	2.89212	2.20007	2.21699	2.28084	2.13043	2.13521	2.29574	2.42016	2.45994
1930.27	6.44325	5.50843	5.72515	5.25862	5.03573	4.63236	4.407	4.56794	3.08581	3.00774	2.96539	2.88222	2.20004	2.21065	2.27846	2.12137	2.13042	2.2856	2.41925	2.44013
1931.74	6.42407	5.50814	5.70833	5.23362	5.03068	4.61469	4.39797	4.57457	3.08689	3.01686	2.96209	2.88008	2.20155	2.20631	2.27283	2.09724	2.11686	2.28754	2.41314	2.41945
1933.21	6.38813	5.50763	5.67582	5.22704	5.02269	4.58543	4.39071	4.59332	3.07608	3.00478	2.95189	2.87844	2.20337	2.20392	2.26196	2.08218	2.10883	2.29551	2.40789	2.4194
1934.69	6.36967	5.49349	5.66032	5.22095	5.01492	4.57428	4.38437	4.59308	3.05063	2.9679	2.94246	2.87458	2.20034	2.19793	2.24572	2.08577	2.10672	2.29641	2.40525	2.42677
1936.16	6.3522	5.44295	5.65182	5.21125	4.99955	4.57965	4.36929	4.54896	3.03326	2.94622	2.91732	2.86672	2.18564	2.18602	2.23877	2.09397	2.10367	2.28894	2.39988	2.42449
1937.63	6.33509	5.40064	5.64388	5.19636	4.98598	4.58007	4.35443	4.50498	3.02649	2.94808	2.89577	2.8622	2.16933	2.17602	2.25202	2.09417	2.09343	2.27987	2.38707	2.41151
1939.11	6.32295	5.40747	5.64269	5.17961	4.98494	4.5671	4.34514	4.49327	3.02021	2.94965	2.89795	2.86104	2.15821	2.17473	2.26755	2.08306	2.07849	2.26616	2.36412	2.4009
1940.58	6.30714	5.43276	5.64657	5.16573	4.98732	4.54756	4.33194	4.48768	3.02062	2.9432	2.90737	2.85781	2.14756	2.17735	2.26337	2.07153	2.07203	2.24524	2.34346	2.39563
1942.05	6.29083	5.44247	5.6412	5.15296	4.97892	4.52765	4.32283	4.48278	3.02795	2.93275	2.90973	2.83908	2.14176	2.17809	2.24905	2.0592	2.0705	2.23653	2.33922	2.3905
1943.52	6.27323	5.43389	5.62943	5.14401	4.94468	4.50519	4.31197	4.4847	3.03159	2.92423	2.90543	2.80616	2.13781	2.17634	2.23789	2.04669	2.06727	2.23024	2.34428	2.38524
1944.99	6.25811	5.42082	5.61697	5.13526	4.91517	4.48837	4.30294	4.48483	3.02936	2.91069	2.90074	2.78851	2.13376	2.17317	2.22588	2.04762	2.06554	2.22715	2.34433	2.37794
1946.46	6.25133	5.39518	5.60614	5.12649	4.91644	4.48903	4.30094	4.46089	3.02628	2.89636	2.8811	2.7885	2.1291	2.16889	2.21206	2.06196	2.06569	2.23426	2.33876	2.37052
1947.93	6.24889	5.35527	5.59631	5.12017	4.92822	4.4958	4.29986	4.4204	3.01734	2.89758	2.84317	2.78906	2.12493	2.16327	2.20017	2.06964	2.06652	2.24457	2.33419	2.36818
1949.4	6.23871	5.34385	5.58487	5.11184	4.92758	4.49386	4.29307	4.40947	2.99986	2.90756	2.83099	2.78418	2.12404	2.15584	2.1857	2.05074	2.06762	2.2433	2.33646	2.36808
1950.87	6.2193	5.35586	5.55989	5.09955	4.91784	4.49006	4.26666	4.42741	2.98766	2.90929	2.84157	2.77494	2.12829	2.14359	2.17974	2.02683	2.06575	2.22685	2.34486	2.36348
1952.34	6.20247	5.36259	5.5349	5.07666	4.9071	4.48547	4.2453	4.44114	2.9854	2.89933	2.85241	2.76796	2.12875	2.13387	2.1818	2.01757	2.04891	2.21102	2.34648	2.35408
1953.81	6.17542	5.34404	5.51295	5.05363	4.88078	4.45752	4.2432	4.42405	2.98406	2.88746	2.8502	2.76658	2.12119	2.1314	2.18329	2.01012	2.02413	2.19697	2.339	2.34417
1955.27	6.13399	5.31469	5.48888	5.04569	4.83837	4.41733	4.24211	4.39351	2.97885	2.87283	2.84238	2.76637	2.11276	2.12956	2.17543	2.00567	2.01389	2.17917	2.33258	2.3308
1956.74	6.12064	5.29967	5.48074	5.04605	4.82013	4.39705	4.23437	4.38281	2.97137	2.85336	2.83894	2.76355	2.10516	2.12231	2.15642	2.00321	2.01344	2.17691	2.33435	2.3145
1958.21	6.12607	5.29622	5.49086	5.04176	4.82208	4.38983	4.21087	4.38196	2.96029	2.84302	2.83613	2.76044	2.09189	2.10475	2.14404	2.00128	2.01481	2.19622	2.34011	2.30561
1959.67	6.12547	5.29067	5.49601	5.02261	4.82631	4.38476	4.18942	4.38179	2.94572	2.8442	2.83108	2.75698	2.08093	2.0906	2.14149	2.00043	2.01446	2.2127	2.3348	2.30397
1961.14	6.09482	5.27216	5.46624	4.99871	4.81219	4.37432	4.17594	4.371	2.93428	2.84695	2.81892	2.75012	2.07688	2.0852	2.14118	1.99774	2.01141	2.20873	2.31246	2.30358
1962.61	6.05131	5.24851	5.41976	4.97969	4.78581	4.36029	4.16304	4.35207	2.92804	2.84116	2.80451	2.74269	2.07518	2.08119	2.14432	1.99308	2.00563	2.19687	2.29425	2.3022
1964.07	6.0349	5.23355	5.40312	4.96313	4.76991	4.35555	4.15441	4.33989	2.92393	2.82858	2.79978	2.73442	2.07552	2.07704	2.15223	1.98028	1.99418	2.18829	2.29546	2.29996
1965.54	6.03375	5.21777	5.40253	4.94852	4.74494	4.35664	4.14215	4.31606	2.92347	2.82027	2.79186	2.72283	2.07799	2.06823	2.15216	1.96974	1.98976	2.16684	2.30381	2.29263
1967	6.0335	5.20475	5.40141	4.92867	4.72721	4.35438	4.13816	4.29716	2.92208	2.81075	2.78421	2.71412	2.07833	2.06354	2.13645	1.96313	1.99569	2.15269	2.30372	2.27407
1968.47	6.02919	5.18226	5.38119	4.91375	4.72585	4.33854	4.14002	4.28012	2.91777	2.80332	2.76987	2.70774	2.06959	2.06612	2.12284	1.95453	2.00218	2.1546	2.29132	2.25898
1969.93	6.02302	5.15392	5.35342	4.90909	4.72576	4.32064	4.13864	4.26032	2.90021	2.80883	2.74948	2.70087	2.0565	2.07058	2.12374	1.95005	1.99988	2.15914	2.27806	2.25395
1971.39	6.00993	5.14497	5.3476	4.90387	4.71512	4.31201	4.13652	4.25704	2.87119	2.82064	2.73765	2.69144	2.05078	2.07364	2.1288	1.94346	1.98744	2.16142	2.26145	2.24713
1972.86	5.97491	5.14105	5.3543	4.8889	4.69108	4.30424	4.13185	4.26241	2.86017	2.82396	2.72405	2.68136	2.0514	2.07219	2.1278	1.93745	1.9788	2.16105	2.23963	2.2411
1974.32	5.95461	5.14305	5.35821	4.85353	4.67472	4.30267	4.12542	4.26708	2.86274	2.81562	2.71964	2.67258	2.05129	2.07131	2.11715	1.93875	1.97114	2.1602	2.23129	2.24014
1975.78	5.94774	5.1387	5.34805	4.82956	4.66896	4.30456	4.10439	4.26492	2.86618	2.80956	2.73635	2.65883	2.04699	2.05989	2.1107	1.94216	1.96228	2.14103	2.23522	2.2404
1977.24	5.93852	5.12861	5.33455	4.83215	4.66614	4.30434	4.07913	4.25952	2.86965	2.80473	2.7574	2.6446	2.04045	2.04299	2.11655	1.93625	1.95848	2.11351	2.23654	2.23454
1978.71	5.93361	5.12234	5.32996	4.84035	4.66622	4.29094	4.07337	4.2527	2.87275	2.79431	2.75437	2.63303	2.03272	2.03332	2.12596	1.91631	1.95497	2.10776	2.22957	2.22699
1980.17	5.92534	5.10239	5.32053	4.83656	4.6606	4.26259	4.07738	4.23479	2.86761	2.78361	2.72333	2.62312	2.02385	2.01626	2.12183	1.90328	1.94778	2.11324	2.21977	2.23006
1981.63	5.9169	5.09149	5.30918	4.8056	4.64981	4.2454	4.07536	4.21888	2.84927	2.76666	2.70464	2.62773	2.0179	2.00795	2.09635	1.90885	1.93456	2.11746	2.2157	2.24266
1983.09	5.89884	5.08375	5.26903	4.78287	4.62795	4.23015	4.05778	4.17787	2.8354	2.75159	2.69585	2.64783	2.01212	2.00854	2.07291	1.91991	1.92415	2.11115	2.21872	2.25133
1984.55	5.87824	5.07504	5.22277	4.78229	4.60661	4.21454	4.03694	4.13506	2.83079	2.73582	2.68643	2.66228	2.00659	2.00951	2.05671	1.91878	1.92431	2.09992	2.22165	2.24406
1986.01	5.86597	5.06741	5.21402	4.78337	4.5959	4.21547	4.02401	4.13637	2.82569	2.71796	2.68153	2.65143	2.00007	2.00694	2.04145	1.90366	1.92864	2.0888	2.21941	2.2304
1987.47	5.84754	5.04261	5.21897	4.78309	4.57816	4.22377	4.01137	4.1497	2.81909	2.71481	2.67317	2.62967	1.98412	1.99894	2.03787	1.89172	1.92888	2.07276	2.21664	2.21795
1988.92	5.83572	5.02837	5.21759	4.7788	4.57334	4.22142	4.00243	4.15755	2.80792	2.71926	2.66834	2.61715	1.97793	1.99012	2.03859	1.88446	1.92269	2.06572	2.21427	2.19706
1990.38	5.8156	5.01571	5.19104	4.77643	4.58158	4.20337	3.99565	4.15476	2.80142	2.72064	2.66433	2.6054	1.9814	1.97877	2.04011	1.87835	1.91709	2.0693	2.20695	2.18253
1991.84	5.79499	5.0015	5.16512	4.76847	4.58962	4.18539	3.991	4.14975	2.79748	2.70861	2.65851	2.59495	1.98344	1.97005	2.04467	1.87254	1.91011	2.0734	2.20055	2.17818
1993.3	5.78936	4.99648	5.1709	4.75457	4.58377	4.1767	3.98623	4.1426	2.79095	2.69382	2.64634	2.57948	1.97679	1.97057	2.04964	1.86516	1.9012	2.06597	2.18542	2.17434
1994.76	5.78627	4.99661	5.19195	4.73352	4.56138	4.17156	3.9782	4.12577	2.78562	2.69456	2.6249	2.56086	1.96348	1.97471	2.04602	1.86176	1.89796	2.04623	2.16218	2.17373
1996.21	5.78481	4.99164	5.19899	4.69508	4.54868	4.16329	3.97483	4.11981	2.77779	2.70068	2.61629	2.55896	1.95676	1.97402	2.03513	1.86838	1.89577	2.03773	2.15459	2.17268
1997.67	5.76351	4.95999	5.17402	4.67445	4.54173	4.14796	3.95145	4.12043	2.76779	2.70082	2.62175	2.56577	1.9633	1.96319	2.02898	1.87603	1.89531	2.04104	2.15659	2.1691
1999.13	5.74225	4.92816	5.14991	4.67215	4.53443	4.13383	3.93031	4.12122	2.74875	2.68233	2.62681	2.56787	1.96824	1.95391	2.02656	1.86959	1.89705	2.04388	2.15465	2.16311
2000.58	5.73138	4.91543	5.14504	4.66962	4.51668	4.12094	3.93142	4.11874	2.72808	2.65891	2.61658	2.55814	1.95602	1.95313	2.02375	1.85301	1.89863	2.04081	2.13944	2.1573
2002.04	5.71007	4.90437	5.13367	4.66753	4.48423	4.10438	3.93646	4.11066	2.7184	2.64642	2.59393	2.54646	1.93554	1.95308	2.01382	1.84434	1.89284	2.03554	2.12324	2.15519
2003.49	5.69808	4.90453	5.11826	4.65995	4.46549	4.08322	3.93637	4.10172	2.71076	2.63255	2.58007	2.54538	1.92724	1.95225	1.99173	1.84436	1.87283	2.02721	2.12143	2.15651
2004.95	5.68513	4.89864	5.08905	4.64904	4.44953	4.05758	3.92106	4.07874	2.70507	2.62439	2.57062	2.54866	1.93269	1.95369	1.98296	1.84703	1.85784	2.01148	2.1245	2.15224
2006.4	5.67175	4.89015	5.06538	4.62126	4.43592	4.04499	3.90904	4.05458	2.70241	2.62326	2.56675	2.54642	1.93689	1.95184	1.99048	1.84502	1.85292	2.00051	2.12602	2.13318
2007.85	5.65277	4.87714	5.04599	4.59244	4.43185	4.05234	3.89615	4.02941	2.70166	2.62324	2.57003	2.53388	1.92849	1.93323	1.99799	1.8398	1.84871	1.99447	2.12465	2.11463
2009.31	5.62723	4.8553	5.01776	4.5858	4.43189	4.06406	3.87535	3.99926	2.69884	2.62029	2.57304	2.52123	1.91529	1.90779	2.00064	1.84013	1.83803	1.9859	2.12323	2.11453
2010.76	5.61577	4.83974	5.00715	4.58543	4.4237	4.05557	3.86357	3.99062	2.69453	2.61491	2.57142	2.51669	1.90991	1.90062	2.00133	1.84144	1.8203	1.98916	2.1172	2.12188
2012.21	5.60306	4.8204	5.00773	4.58117	4.40282	4.02504	3.8451	3.99255	2.68894	2.61259	2.56566	2.51358	1.90985	1.90353	1.99652	1.83992	1.81338	2.0017	2.10349	2.12272
2013.66	5.58865	4.81005	5.00829	4.56974	4.3891	4.00721	3.82889	3.99356	2.67182	2.6107	2.56195	2.50527	1.90935	1.90748	1.97748	1.82726	1.82425	2.00871	2.09484	2.11477
2015.12	5.56192	4.81321	4.99976	4.56005	4.37944	4.00042	3.81368	3.98053	2.65516	2.60817	2.55791	2.48722	1.90572	1.91603	1.95989	1.8087	1.83556	2.00383	2.08981	2.1055
2016.57	5.52736	4.81708	4.98625	4.5583	4.3663	3.99459	3.79989	3.95842	2.64843	2.59734	2.55036	2.47213	1.90199	1.92521	1.95523	1.79769	1.83396	1.99538	2.08644	2.09555
2018.02	5.50847	4.80933	4.97213	4.5588	4.36144	3.99848	3.79537	3.94177	2.64096	2.57868	2.54278	2.47236	1.8981	1.91937	1.9531	1.79143	1.82686	1.98623	2.08542	2.08521
2019.47	5.49409	4.77448	4.94105	4.54787	4.35058	4.00759	3.79341	3.92125	2.63555	2.57144	2.52994	2.47981	1.88417	1.89567	1.94866	1.79005	1.82352	1.96681	2.08241	2.08288
2020.92	5.48477	4.7524	4.92259	4.51991	4.34102	4.01138	3.79362	3.91115	2.63253	2.57015	2.51842	2.4792	1.877	1.88042	1.93721	1.79129	1.81811	1.95212	2.07716	2.08786
2022.37	5.47999	4.73379	4.92146	4.49317	4.31292	3.99883	3.78652	3.92088	2.63014	2.56907	2.50696	2.46276	1.87412	1.86969	1.9275	1.7934	1.81194	1.94321	2.06272	2.09153
2023.82	5.47301	4.71119	4.91977	4.4758	4.28102	3.97875	3.77827	3.93332	2.62803	2.56454	2.49601	2.4477	1.87037	1.8617	1.92535	1.79399	1.81198	1.93686	2.04793	2.0886
2025.27	5.45364	4.70122	4.90538	4.46476	4.27719	3.9554	3.77477	3.92521	2.62571	2.55457	2.49151	2.44034	1.87076	1.86307	1.92534	1.79009	1.81548	1.93748	2.04067	2.08102
2026.71	5.41978	4.68751	4.87315	4.46089	4.27531	3.92992	3.7678	3.89497	2.61805	2.54691	2.49065	2.43281	1.86995	1.86614	1.92556	1.78681	1.81496	1.94145	2.03569	2.06938
2028.16	5.40097	4.67742	4.85148	4.45724	4.27512	3.91825	3.76912	3.8733	2.60542	2.54349	2.48632	2.43488	1.8662	1.86616	1.9276	1.78706	1.80733	1.9429	2.0345	2.05228
2029.61	5.40435	4.67361	4.84164	4.45241	4.27413	3.91681	3.77207	3.86923	2.60112	2.54399	2.46848	2.44553	1.85805	1.86379	1.92618	1.7876	1.80281	1.93673	2.0351	2.04138
2031.06	5.41317	4.67378	4.83525	4.43548	4.26866	3.91378	3.77166	3.87108	2.60967	2.54412	2.45026	2.45147	1.84978	1.86209	1.91203	1.79224	1.80104	1.92902	2.03382	2.04181
2032.51	5.40509	4.67631	4.82635	4.41556	4.25221	3.90336	3.75802	3.86315	2.61845	2.54275	2.44175	2.44022	1.84232	1.85509	1.89704	1.80082	1.79778	1.92462	2.02564	2.04393
2033.95	5.37638	4.67774	4.81074	4.41478	4.22745	3.8923	3.73174	3.84131	2.61849	2.53669	2.43284	2.42277	1.83107	1.84117	1.89642	1.79867	1.78547	1.91904	2.01449	2.04297
2035.4	5.36386	4.67382	4.80317	4.42115	4.22084	3.88873	3.71835	3.83377	2.61433	2.52255	2.43488	2.41588	1.82462	1.83828	1.89982	1.77788	1.76136	1.91417	2.01275	2.04005
2036.84	5.35638	4.65817	4.79856	4.4192	4.2295	3.88285	3.71078	3.84305	2.60547	2.51279	2.4531	2.41026	1.82117	1.84138	1.90146	1.75781	1.75176	1.90887	2.01799	2.03398
2038.29	5.34961	4.64062	4.79467	4.39727	4.23835	3.87968	3.70533	3.85241	2.58017	2.50255	2.46761	2.40082	1.82075	1.84371	1.8977	1.74444	1.76632	1.90573	2.01794	2.01719
2039.73	5.33672	4.61803	4.79728	4.37529	4.23665	3.88839	3.69653	3.85068	2.55751	2.49091	2.45863	2.38434	1.82337	1.83259	1.89259	1.73507	1.7845	1.90626	2.00784	1.99884
2041.18	5.3159	4.58757	4.80514	4.3659	4.22742	3.8988	3.68703	3.84145	2.56316	2.48454	2.43816	2.36794	1.82586	1.81554	1.88824	1.73752	1.78106	1.9064	1.99769	1.99589
2042.62	5.31511	4.57697	4.80252	4.35491	4.21735	3.89402	3.68394	3.82687	2.57996	2.47836	2.42972	2.3624	1.82716	1.81464	1.88192	1.74932	1.76082	1.90195	1.99429	2.00086
2044.07	5.32352	4.56887	4.77245	4.34742	4.18971	3.87599	3.67045	3.79641	2.57836	2.47615	2.42696	2.35975	1.82111	1.81773	1.88008	1.75455	1.75432	1.88573	1.99347	2.00212
2045.51	5.32658	4.56294	4.74984	4.33803	4.17022	3.86779	3.66306	3.77666	2.54526	2.47509	2.42406	2.35143	1.81474	1.81739	1.88157	1.73705	1.76228	1.87544	1.99565	1.99688
2046.95	5.30241	4.5622	4.75046	4.32961	4.18112	3.86734	3.65593	3.78901	2.51911	2.47256	2.41788	2.33082	1.80775	1.80719	1.88202	1.71568	1.76799	1.88119	2.00015	1.99106
2048.4	5.2678	4.56494	4.75273	4.32719	4.20039	3.86606	3.64897	3.81028	2.5232	2.46614	2.41193	2.31389	1.79921	1.7962	1.87734	1.71602	1.7521	1.88986	2.00216	1.98796
2049.84	5.26393	4.57187	4.73922	4.32654	4.19908	3.85325	3.64975	3.80491	2.53348	2.45631	2.41334	2.31968	1.79609	1.79767	1.86903	1.72712	1.72494	1.8879	1.99015	1.98667
2051.28	5.27469	4.57958	4.69554	4.32011	4.17937	3.82936	3.645	3.76332	2.53135	2.44921	2.42008	2.33543	1.79198	1.80614	1.85907	1.7309	1.71869	1.87205	1.96593	1.9867
2052.72	5.28218	4.58097	4.67115	4.30201	4.16436	3.8187	3.64476	3.73868	2.51594	2.44364	2.42492	2.34356	1.78719	1.80859	1.84238	1.71894	1.7268	1.86363	1.95806	1.98701
2054.16	5.26337	4.56509	4.6795	4.29294	4.14382	3.81144	3.64426	3.72917	2.50924	2.44045	2.4093	2.34337	1.77656	1.80502	1.83206	1.70667	1.72983	1.85766	1.96895	1.98663
2055.6	5.2386	4.54376	4.69429	4.30097	4.12345	3.80467	3.64331	3.72275	2.52141	2.43668	2.3891	2.34168	1.76512	1.8003	1.8332	1.70121	1.71068	1.8512	1.97807	1.97942
2057.04	5.24005	4.53014	4.69437	4.30938	4.12085	3.78698	3.64554	3.73394	2.53682	2.43076	2.39177	2.3286	1.76044	1.79878	1.835	1.69528	1.68457	1.85373	1.97703	1.96742
2058.48	5.25223	4.51494	4.67517	4.30759	4.11664	3.75794	3.64735	3.7548	2.53251	2.43003	2.40358	2.30512	1.75582	1.79997	1.83073	1.694	1.68134	1.85939	1.9717	1.96028
2059.92	5.24985	4.50981	4.66381	4.29673	4.11163	3.75159	3.64026	3.76103	2.50998	2.43319	2.40226	2.29406	1.7542	1.79457	1.81956	1.69746	1.69241	1.86173	1.96501	1.95243
2061.36	5.20349	4.50878	4.65158	4.28913	4.09783	3.76576	3.60337	3.73518	2.49782	2.43252	2.37806	2.29119	1.75971	1.78027	1.81533	1.70027	1.69544	1.84512	1.95506	1.94642
2062.8	5.15753	4.50524	4.63766	4.28654	4.08356	3.77472	3.57435	3.70844	2.4983	2.42503	2.35511	2.29059	1.76442	1.76902	1.82274	1.68471	1.68072	1.82812	1.94706	1.94102
2064.24	5.14706	4.48698	4.62744	4.28298	4.07981	3.77201	3.5682	3.70403	2.4972	2.4161	2.35033	2.29368	1.76046	1.75609	1.82882	1.66165	1.6647	1.83049	1.94192	1.93351
2065.68	5.14204	4.45512	4.61747	4.26186	4.08011	3.76464	3.56132	3.70313	2.49648	2.40922	2.35032	2.29775	1.75332	1.73883	1.82415	1.65651	1.67653	1.83879	1.93667	1.93131
2067.12	5.13828	4.44683	4.6123	4.22452	4.07405	3.75177	3.54853	3.70036	2.49759	2.40377	2.35167	2.29927	1.75043	1.73451	1.81477	1.65771	1.70625	1.83987	1.93186	1.93217
2068.55	5.13504	4.45425	4.60853	4.21173	4.05041	3.73066	3.52613	3.6867	2.49417	2.39484	2.35777	2.29907	1.75162	1.73618	1.80882	1.65942	1.71231	1.83118	1.92444	1.93153
2069.99	5.13133	4.45729	4.60687	4.22205	4.03095	3.71432	3.51257	3.67539	2.47977	2.37576	2.36093	2.29635	1.75208	1.73552	1.80522	1.66265	1.68548	1.82502	1.92007	1.92417
2071.43	5.1123	4.4287	4.60803	4.22799	4.02163	3.69863	3.51668	3.66418	2.46452	2.36163	2.34798	2.28337	1.74701	1.72844	1.80073	1.66532	1.66148	1.82275	1.91709	1.91496
2072.86	5.08478	4.38447	4.60831	4.21259	4.01154	3.68366	3.52359	3.64719	2.45079	2.36193	2.32767	2.26568	1.73908	1.71967	1.79029	1.66555	1.65002	1.81801	1.91394	1.91113
2074.3	5.07551	4.37176	4.5971	4.18502	4.00326	3.67515	3.51873	3.63396	2.4332	2.36471	2.31739	2.25476	1.73153	1.71345	1.77528	1.66477	1.64307	1.8125	1.9089	1.909
2075.73	5.06353	4.37766	4.55761	4.17466	3.98604	3.66855	3.50679	3.60791	2.41795	2.37095	2.30156	2.24603	1.71511	1.70869	1.77286	1.66127	1.64235	1.79994	1.89675	1.90324
2077.17	5.05622	4.38022	4.5353	4.1759	3.97485	3.66092	3.4977	3.59378	2.40312	2.38138	2.29107	2.24188	1.70376	1.70762	1.78385	1.64748	1.64295	1.79117	1.89111	1.88804
2078.6	5.06214	4.38798	4.53063	4.17017	3.97761	3.6438	3.47349	3.60454	2.39724	2.38415	2.28994	2.23875	1.70409	1.70933	1.79003	1.6355	1.64364	1.78317	1.89029	1.87443
2080.04	5.06784	4.39804	4.52864	4.14658	3.98267	3.63095	3.45148	3.6196	2.40458	2.36509	2.29047	2.23539	1.70704	1.71162	1.77951	1.63074	1.63886	1.77654	1.88814	1.86987
2081.47	5.04918	4.38661	4.53179	4.1218	3.98049	3.6373	3.44478	3.61605	2.41451	2.34222	2.28723	2.23456	1.7058	1.71191	1.76536	1.62577	1.63259	1.7752	1.88311	1.86521
2082.91	5.00588	4.35416	4.52904	4.11477	3.97515	3.65178	3.43961	3.5959	2.41079	2.32591	2.28057	2.23269	1.70284	1.70988	1.7662	1.61902	1.63047	1.76908	1.87427	1.86337
2084.34	4.98619	4.33339	4.51767	4.11266	3.9649	3.64562	3.44257	3.58443	2.39233	2.30089	2.27443	2.22815	1.69782	1.7073	1.77621	1.61089	1.6279	1.76518	1.86736	1.86798
2085.77	4.98027	4.31617	4.47541	4.10118	3.9247	3.60583	3.45163	3.5766	2.38291	2.28948	2.25234	2.22409	1.67551	1.69846	1.77831	1.60705	1.62294	1.75102	1.85978	1.8728
2087.2	4.97544	4.30184	4.43452	4.06361	3.88708	3.58103	3.45694	3.56862	2.38483	2.29295	2.23083	2.21905	1.65566	1.68944	1.76831	1.59484	1.60688	1.73837	1.85555	1.87685
2088.64	4.96205	4.28798	4.41765	4.02637	3.87838	3.58202	3.44878	3.55218	2.38524	2.29512	2.23389	2.20425	1.65558	1.68295	1.7562	1.57996	1.59283	1.7436	1.85957	1.88276
2090.07	4.93564	4.26669	4.40352	4.01774	3.87402	3.58525	3.43349	3.52433	2.38051	2.29298	2.2482	2.18724	1.65928	1.67771	1.74397	1.57814	1.59169	1.75502	1.86661	1.87401
2091.5	4.91678	4.25646	4.40046	4.01737	3.86958	3.58703	3.41983	3.51022	2.37161	2.2877	2.24502	2.18096	1.65895	1.67603	1.73192	1.5828	1.59529	1.75457	1.86285	1.84591
2092.93	4.89078	4.25438	4.40095	4.01574	3.85812	3.58791	3.40177	3.49543	2.36377	2.28407	2.21581	2.17273	1.65174	1.67765	1.72461	1.58599	1.59918	1.73731	1.84491	1.8274
2094.36	4.87452	4.25185	4.40012	4.00889	3.84902	3.58699	3.38468	3.48755	2.35627	2.27773	2.19779	2.16686	1.64704	1.67509	1.71559	1.57923	1.60509	1.72499	1.83458	1.82567
2095.79	4.87231	4.24153	4.38949	4.00373	3.8381	3.5751	3.35893	3.49946	2.34924	2.27367	2.20744	2.16468	1.64872	1.66233	1.71007	1.5708	1.6071	1.71963	1.83315	1.82512
2097.22	4.86917	4.22716	4.37411	4.00036	3.82531	3.55813	3.33498	3.51642	2.33515	2.27024	2.22133	2.1628	1.65158	1.64868	1.71538	1.56281	1.59054	1.71339	1.82967	1.8238
2098.65	4.85847	4.21149	4.36112	3.9954	3.82947	3.53311	3.32572	3.51157	2.31851	2.26358	2.22123	2.15667	1.65226	1.64094	1.72173	1.55294	1.56957	1.71135	1.82794	1.82286
2100.08	4.83557	4.18397	4.33288	3.97984	3.85193	3.50168	3.3206	3.48071	2.31245	2.25367	2.20729	2.14184	1.64956	1.63445	1.71367	1.54943	1.56441	1.70688	1.82606	1.81942
2101.51	4.81606	4.16835	4.31636	3.94608	3.85849	3.48371	3.31693	3.4568	2.30605	2.23268	2.1969	2.13425	1.64703	1.63406	1.6904	1.54757	1.5668	1.70256	1.82287	1.81373
2102.93	4.78326	4.1675	4.31749	3.9261	3.82128	3.47293	3.32188	3.43546	2.30132	2.22273	2.18685	2.13486	1.64065	1.64422	1.67268	1.54643	1.56816	1.69995	1.81914	1.80708
2104.36	4.75296	4.16704	4.31997	3.93077	3.77805	3.46495	3.32435	3.41915	2.29743	2.23416	2.17786	2.13451	1.63231	1.64914	1.66564	1.54553	1.57253	1.69823	1.81353	1.79732
2105.79	4.74996	4.15101	4.31027	3.93613	3.76452	3.46146	3.31257	3.42319	2.29381	2.2471	2.17226	2.12637	1.62167	1.62821	1.66316	1.54476	1.57635	1.69333	1.80333	1.78672
2107.22	4.75466	4.12078	4.29166	3.92601	3.75915	3.46034	3.295	3.43626	2.29506	2.24025	2.16327	2.11374	1.60581	1.59875	1.66923	1.54425	1.57443	1.68299	1.79208	1.77939
2108.64	4.75329	4.10841	4.28116	3.9049	3.75093	3.4524	3.28221	3.43671	2.29605	2.22007	2.16021	2.10754	1.60129	1.593	1.67982	1.54248	1.56962	1.67673	1.78233	1.77134
2110.07	4.74166	4.10453	4.26895	3.88592	3.73255	3.43148	3.26818	3.41801	2.28968	2.21057	2.15765	2.1016	1.60395	1.5971	1.67762	1.53873	1.56271	1.67057	1.77016	1.76649
2111.5	4.72704	4.10194	4.25535	3.86612	3.71714	3.41563	3.26071	3.40129	2.27113	2.20601	2.15271	2.09659	1.60629	1.59774	1.65702	1.53338	1.54781	1.66653	1.76159	1.76904
2112.92	4.70068	4.08526	4.232	3.85308	3.70028	3.40697	3.26089	3.38869	2.25677	2.20134	2.14151	2.09294	1.60331	1.58493	1.64154	1.52852	1.53695	1.66499	1.75787	1.77489
2114.35	4.66663	4.05917	4.20293	3.85187	3.6798	3.39956	3.25915	3.37033	2.25508	2.19894	2.12887	2.08823	1.59726	1.57364	1.64938	1.52118	1.53493	1.66324	1.75472	1.77161
2115.77	4.65284	4.05227	4.19139	3.85187	3.67689	3.39234	3.24078	3.35558	2.25501	2.1942	2.12629	2.07918	1.59182	1.57435	1.66541	1.51063	1.53481	1.66118	1.74903	1.75659
2117.19	4.64883	4.04763	4.18091	3.8376	3.67917	3.38455	3.20828	3.34163	2.25615	2.18701	2.12586	2.06182	1.58089	1.5737	1.66424	1.50306	1.52692	1.65371	1.73663	1.7474
2118.62	4.64543	4.0397	4.17327	3.80123	3.68113	3.37904	3.1972	3.33364	2.259	2.17523	2.12492	2.05087	1.57539	1.57426	1.6455	1.49339	1.51186	1.64977	1.73099	1.74261
2120.04	4.6374	4.01641	4.1713	3.77986	3.68312	3.37394	3.20571	3.33557	2.25755	2.16881	2.11758	2.04659	1.5751	1.57273	1.63154	1.4879	1.50591	1.65201	1.7317	1.73672
2121.47	4.62647	3.99348	4.16955	3.78189	3.68247	3.36836	3.21083	3.33908	2.23854	2.16604	2.1073	2.04439	1.57573	1.57172	1.62879	1.48785	1.50539	1.65469	1.73165	1.72925
2122.89	4.61276	3.985	4.15723	3.7826	3.66882	3.35734	3.19603	3.32508	2.21503	2.15892	2.09947	2.04949	1.57809	1.57362	1.62838	1.48851	1.50482	1.64888	1.73087	1.71923
2124.31	4.59305	3.97169	4.13182	3.7735	3.63926	3.34217	3.17487	3.29121	2.20781	2.1518	2.09129	2.05833	1.58111	1.57379	1.62651	1.48327	1.50229	1.63281	1.72816	1.71673
2125.73	4.57103	3.96468	4.11294	3.75656	3.61699	3.32132	3.16497	3.2801	2.20734	2.14518	2.08529	2.05617	1.58115	1.56454	1.6241	1.4697	1.49702	1.62652	1.72229	1.71914
2127.15	4.52811	3.96258	4.09122	3.74726	3.59743	3.29056	3.15232	3.2869	2.20545	2.13876	2.0752	2.03917	1.57549	1.54402	1.62173	1.46184	1.48907	1.62556	1.71182	1.72111
2128.58	4.4941	3.95598	4.06973	3.74782	3.58503	3.2705	3.14016	3.29222	2.19591	2.13451	2.06716	2.02564	1.56746	1.53001	1.61403	1.46031	1.47721	1.624	1.70477	1.71738
2130	4.4864	3.93507	4.04921	3.74867	3.57436	3.26467	3.11483	3.26562	2.18763	2.13231	2.06094	2.02386	1.55237	1.52383	1.60534	1.46065	1.47003	1.62063	1.7019	1.7113
2131.42	4.48314	3.91063	4.02752	3.73217	3.55905	3.2601	3.08979	3.21961	2.18192	2.13035	2.05177	2.0236	1.53275	1.51949	1.59986	1.45848	1.46762	1.61694	1.69746	1.70522
2132.84	4.47478	3.90109	4.01132	3.70579	3.55353	3.24744	3.08327	3.20763	2.17337	2.12945	2.04478	2.0175	1.52503	1.5181	1.59408	1.45309	1.46598	1.61518	1.69413	1.69132
2134.26	4.45264	3.88884	3.98864	3.69407	3.54859	3.23085	3.08022	3.20973	2.16303	2.11989	2.03414	2.00436	1.52113	1.51884	1.5906	1.44569	1.46217	1.61378	1.68995	1.68593
2135.68	4.43863	3.87832	3.97165	3.68513	3.53881	3.22329	3.0731	3.20842	2.14396	2.09659	2.02857	1.99612	1.51817	1.51392	1.58902	1.43388	1.45561	1.60857	1.68458	1.69414
2137.1	4.43446	3.87265	3.96316	3.67484	3.51265	3.21997	3.06051	3.19667	2.13067	2.08025	2.02753	1.99389	1.51585	1.50496	1.5853	1.42708	1.44952	1.58888	1.67449	1.69992
2138.51	4.42533	3.86641	3.95952	3.65717	3.48822	3.21781	3.05332	3.18163	2.12698	2.06839	2.02646	1.98956	1.51395	1.49744	1.56972	1.43006	1.43881	1.56765	1.66517	1.68778
2139.93	4.39548	3.84674	3.96299	3.63334	3.48417	3.21695	3.05913	3.16643	2.12359	2.05572	2.01623	1.97822	1.51262	1.49072	1.5515	1.43372	1.43086	1.55969	1.66049	1.66498
2141.35	4.34753	3.80984	3.96912	3.6076	3.48124	3.21498	3.06834	3.14816	2.1204	2.05005	1.99088	1.9622	1.51106	1.48565	1.53834	1.42596	1.43072	1.55412	1.6538	1.65794
2142.77	4.32459	3.7876	3.95932	3.57773	3.47482	3.19769	3.06152	3.1422	2.11729	2.04285	1.97962	1.95316	1.50414	1.48835	1.52225	1.41026	1.43305	1.55255	1.65322	1.66676
2144.18	4.32106	3.77623	3.92201	3.56585	3.44908	3.16222	3.03131	3.14447	2.11011	2.03571	1.97926	1.94865	1.48144	1.49405	1.5204	1.40465	1.43157	1.55716	1.65748	1.67038
2145.6	4.32251	3.77068	3.89076	3.57004	3.42619	3.14365	3.01515	3.14572	2.09233	2.02476	1.98135	1.94479	1.46429	1.49541	1.53416	1.40538	1.42479	1.5599	1.65903	1.65145
2147.02	4.31864	3.76643	3.88064	3.57099	3.41969	3.13733	3.00915	3.14211	2.07955	2.01745	1.97781	1.94106	1.46684	1.49039	1.54293	1.4059	1.42154	1.54448	1.65275	1.62657
2148.43	4.31118	3.76021	3.87588	3.55081	3.41623	3.1332	3.00544	3.13538	2.07976	2.0191	1.97044	1.93744	1.47401	1.48666	1.5314	1.39649	1.41441	1.52155	1.64299	1.62047
2149.85	4.30752	3.75328	3.87713	3.52183	3.41104	3.12601	3.00574	3.12341	2.08035	2.02215	1.96825	1.93428	1.47323	1.48909	1.5122	1.38421	1.40752	1.51938	1.63206	1.61842
2151.26	4.29751	3.73816	3.88063	3.51702	3.40293	3.11396	3.00411	3.10136	2.0828	2.02672	1.96107	1.93005	1.46338	1.49214	1.50675	1.38405	1.40717	1.52512	1.61455	1.61713
2152.68	4.29243	3.72928	3.88093	3.52646	3.39903	3.11186	2.99688	3.08942	2.08802	2.03101	1.95244	1.92307	1.45683	1.48898	1.51022	1.38865	1.40693	1.52881	1.60545	1.61604
2154.09	4.28628	3.72099	3.84806	3.53301	3.39483	3.1183	2.97784	3.09413	2.08844	2.02835	1.93126	1.90732	1.45706	1.47517	1.51282	1.39219	1.40296	1.53153	1.60684	1.61208
2155.51	4.28058	3.71058	3.81069	3.53775	3.39073	3.12201	2.96551	3.10086	2.07747	2.01465	1.91155	1.89337	1.45656	1.46251	1.51278	1.393	1.39709	1.53182	1.60782	1.59947
2156.92	4.27737	3.69971	3.80895	3.54349	3.38879	3.10569	2.96175	3.09554	2.06534	2.00113	1.91587	1.89373	1.44422	1.45341	1.51205	1.3935	1.39264	1.52361	1.60409	1.58077
2158.34	4.26642	3.68557	3.82137	3.53283	3.3839	3.08463	2.95692	3.08269	2.0626	1.99277	1.93118	1.89745	1.4233	1.44458	1.50501	1.39072	1.38327	1.5103	1.59678	1.57664
2159.75	4.25619	3.67919	3.82736	3.5078	3.37721	3.08545	2.94902	3.07897	2.06367	1.98478	1.93504	1.89785	1.42108	1.43507	1.49189	1.38233	1.37402	1.50254	1.59468	1.58974
2161.16	4.23745	3.67958	3.82401	3.49913	3.35576	3.09737	2.93448	3.07883	2.0606	1.98133	1.93061	1.89168	1.43687	1.42199	1.48586	1.3725	1.37242	1.49143	1.60007	1.59617
2162.57	4.22118	3.67648	3.81514	3.50287	3.33969	3.1001	2.9197	3.07696	2.05065	1.97832	1.92409	1.88489	1.44752	1.4181	1.48427	1.35427	1.37163	1.48496	1.60121	1.58494
2163.98	4.19094	3.6552	3.78943	3.49763	3.33244	3.08921	2.88955	3.05427	2.0416	1.97548	1.912	1.88267	1.43993	1.41847	1.47964	1.34352	1.37249	1.4858	1.58736	1.57307
2165.4	4.15457	3.62946	3.75727	3.47315	3.32213	3.07305	2.86848	3.01867	2.03485	1.97819	1.89822	1.88234	1.4272	1.41782	1.47039	1.34422	1.3769	1.48616	1.56929	1.57188
2166.81	4.15	3.62292	3.74892	3.44686	3.30747	3.04801	2.87244	2.99834	2.02977	1.983	1.89491	1.8784	1.42242	1.41285	1.46184	1.34747	1.3788	1.4807	1.56536	1.57491
2168.22	4.1525	3.61969	3.75717	3.43613	3.28323	3.02125	2.87733	2.98314	2.02527	1.97895	1.89857	1.87145	1.42042	1.405	1.45695	1.34666	1.35921	1.46636	1.56998	1.57586
2169.63	4.15299	3.61127	3.75586	3.42726	3.27381	3.01186	2.87083	2.977	2.01665	1.9665	1.89778	1.8623	1.416	1.39889	1.4519	1.34108	1.33108	1.46225	1.57	1.57166
2171.04	4.13268	3.58051	3.72173	3.41888	3.28964	3.01129	2.85657	2.98093	2.00874	1.95369	1.87933	1.84657	1.40574	1.38893	1.44878	1.33417	1.32888	1.47232	1.55909	1.56791
2172.45	4.11114	3.55258	3.68909	3.41249	3.30386	3.00376	2.8465	2.98297	1.99492	1.93591	1.86357	1.83297	1.39585	1.38246	1.44287	1.31649	1.34512	1.48092	1.54918	1.56192
2173.86	4.09708	3.55373	3.68275	3.40556	3.28378	2.97308	2.83405	2.97102	1.98166	1.92136	1.86737	1.8272	1.39047	1.37271	1.43625	1.30431	1.35099	1.47502	1.54719	1.55045
2175.27	4.07761	3.56242	3.67899	3.39133	3.24407	2.9412	2.82189	2.94981	1.97771	1.91781	1.87399	1.82117	1.38645	1.36393	1.42834	1.30107	1.34013	1.4628	1.54524	1.54374
2176.67	4.07452	3.55277	3.6665	3.37451	3.22914	2.9314	2.81964	2.93012	1.9738	1.91391	1.87053	1.81837	1.3833	1.36674	1.41582	1.29789	1.32654	1.45736	1.54296	1.53376
2178.08	4.08087	3.52794	3.63503	3.35775	3.22701	2.93191	2.82007	2.90858	1.96531	1.90543	1.85859	1.81243	1.37652	1.37336	1.41502	1.29849	1.31248	1.44709	1.53811	1.52467
2179.49	4.07615	3.50153	3.61565	3.33069	3.22191	2.93269	2.81204	2.89457	1.94995	1.89115	1.84801	1.80833	1.3716	1.37144	1.42624	1.30349	1.29576	1.44029	1.53546	1.5183
2180.9	4.02614	3.47087	3.61606	3.31296	3.18605	2.93516	2.79089	2.88497	1.93889	1.88238	1.83867	1.80796	1.36551	1.35741	1.42979	1.30242	1.28971	1.4317	1.5353	1.51298
2182.3	3.97228	3.4464	3.61828	3.30619	3.14716	2.93515	2.77284	2.8768	1.93047	1.88471	1.8298	1.80598	1.35925	1.34752	1.41107	1.28753	1.2968	1.42243	1.53418	1.50686
2183.71	3.96836	3.44875	3.61099	3.2987	3.14475	2.92869	2.75522	2.87451	1.92065	1.88873	1.82485	1.7944	1.35725	1.35288	1.39007	1.27545	1.30095	1.4221	1.53069	1.49696
2185.12	3.97832	3.46461	3.59493	3.29418	3.15196	2.91983	2.73499	2.87452	1.91719	1.87595	1.8214	1.77091	1.35453	1.36001	1.39287	1.27041	1.29409	1.42394	1.52312	1.48761
2186.52	3.97242	3.45947	3.57959	3.28815	3.15079	2.89705	2.72443	2.86945	1.91668	1.84965	1.81454	1.75767	1.35163	1.34983	1.40707	1.2627	1.28514	1.42158	1.51501	1.46988
2187.93	3.92825	3.4219	3.553	3.2746	3.14108	2.85795	2.71961	2.85353	1.90599	1.83823	1.80015	1.7508	1.34786	1.32632	1.41018	1.25785	1.27989	1.41001	1.5002	1.45803
2189.33	3.89097	3.39284	3.53284	3.2464	3.13109	2.83838	2.71744	2.83896	1.87987	1.84023	1.78869	1.74723	1.34299	1.31539	1.40075	1.25284	1.27458	1.40035	1.48942	1.46532
2190.74	3.89323	3.38925	3.52448	3.22277	3.11385	2.8419	2.72064	2.82996	1.86282	1.83954	1.77993	1.75193	1.34084	1.31389	1.39168	1.25003	1.27142	1.38715	1.49215	1.47602
2192.14	3.90419	3.38733	3.51502	3.21458	3.09282	2.84417	2.71922	2.82152	1.87372	1.83782	1.76973	1.75791	1.33965	1.31309	1.38018	1.25012	1.26655	1.3703	1.49606	1.47233
2193.55	3.88104	3.37272	3.50333	3.20694	3.08624	2.83022	2.70568	2.81578	1.89105	1.83712	1.76551	1.75118	1.32844	1.31483	1.36625	1.24939	1.26152	1.37164	1.48959	1.45601
2194.95	3.81664	3.34283	3.48575	3.18462	3.08139	2.81051	2.69035	2.81148	1.88472	1.83053	1.76411	1.73095	1.30517	1.31764	1.35673	1.24227	1.25734	1.38551	1.47319	1.45006
2196.35	3.78874	3.32823	3.47182	3.15019	3.07352	2.8006	2.68153	2.80641	1.8602	1.81969	1.7572	1.71919	1.29381	1.3054	1.34734	1.2317	1.25387	1.38859	1.46158	1.45955
2197.76	3.80353	3.33483	3.4548	3.13262	3.06197	2.79448	2.67448	2.79777	1.84552	1.81016	1.74003	1.71493	1.2936	1.27478	1.3405	1.23049	1.25192	1.37233	1.44993	1.4671
2199.16	3.81677	3.33964	3.44046	3.13339	3.05148	2.78831	2.67011	2.78837	1.84576	1.80132	1.72535	1.70985	1.29347	1.26256	1.33264	1.23798	1.25018	1.35655	1.43915	1.45985
2200.56	3.80394	3.32788	3.42683	3.13345	3.03974	2.77736	2.66563	2.76682	1.8471	1.79479	1.72357	1.70106	1.28891	1.27058	1.32599	1.23937	1.2472	1.35516	1.44193	1.44405
2201.96	3.78067	3.31126	3.40515	3.12291	3.02407	2.76421	2.65844	2.73373	1.8433	1.78745	1.72585	1.68265	1.28262	1.27778	1.32088	1.22353	1.23601	1.35766	1.44864	1.42975
2203.36	3.76207	3.29922	3.38925	3.10604	3.01167	2.75175	2.63841	2.72404	1.83768	1.77737	1.72094	1.67085	1.27805	1.27508	1.31378	1.20896	1.22715	1.35561	1.44358	1.41136
2204.77	3.73189	3.28002	3.36919	3.10147	2.98861	2.73958	2.60978	2.72551	1.83046	1.76922	1.70556	1.66262	1.27285	1.26927	1.31013	1.21201	1.22214	1.3512	1.42375	1.40109
2206.17	3.70976	3.26743	3.3534	3.10875	2.97593	2.72903	2.60843	2.7247	1.81951	1.75835	1.69518	1.65722	1.2668	1.26919	1.30735	1.21841	1.21728	1.34557	1.41049	1.40237
2207.57	3.69885	3.2558	3.3429	3.10424	2.97804	2.71766	2.63056	2.70603	1.81367	1.74832	1.69322	1.65186	1.25924	1.2734	1.30486	1.21512	1.21866	1.32935	1.41257	1.4035
2208.97	3.69142	3.2438	3.33666	3.07733	2.98	2.71034	2.63955	2.68553	1.81356	1.73942	1.69311	1.64553	1.25281	1.27387	1.29995	1.19897	1.22374	1.31349	1.41648	1.39961
2210.37	3.68389	3.23462	3.33561	3.05421	2.97198	2.72067	2.62414	2.68189	1.81249	1.73224	1.68552	1.64362	1.25063	1.26061	1.29647	1.18733	1.22425	1.31174	1.4094	1.39192
2211.77	3.67414	3.22105	3.33663	3.05966	2.95726	2.73591	2.60584	2.68364	1.8088	1.73692	1.66925	1.64347	1.25039	1.24689	1.29932	1.18566	1.21312	1.31343	1.39141	1.38876
2213.16	3.67151	3.21139	3.34133	3.07786	2.94417	2.7353	2.58943	2.68833	1.80308	1.74852	1.66601	1.64003	1.24952	1.24713	1.30274	1.18493	1.20301	1.31491	1.38291	1.38982
2214.56	3.68272	3.20465	3.34775	3.07481	2.92658	2.72419	2.56797	2.701	1.79786	1.74871	1.66798	1.62507	1.25142	1.25073	1.30121	1.17961	1.1977	1.32051	1.3787	1.38972
2215.96	3.68978	3.20165	3.35023	3.04822	2.91511	2.71461	2.56206	2.70772	1.79287	1.73789	1.66821	1.61332	1.25054	1.24846	1.29363	1.17103	1.19142	1.32293	1.37396	1.38403
2217.36	3.67437	3.19883	3.31917	3.03137	2.91324	2.70314	2.56734	2.68513	1.78923	1.7288	1.656	1.60898	1.24006	1.23716	1.28855	1.16882	1.18906	1.30564	1.3697	1.37646
2218.76	3.65105	3.19515	3.27622	3.0234	2.91301	2.69512	2.56852	2.65332	1.78294	1.71918	1.64058	1.60218	1.22847	1.23019	1.28375	1.17088	1.18656	1.2844	1.36375	1.3745
2220.15	3.63654	3.19195	3.27174	3.01137	2.90768	2.68657	2.55337	2.63687	1.7757	1.70951	1.64005	1.60378	1.22591	1.23468	1.27688	1.17	1.18574	1.2816	1.35794	1.37468
2221.55	3.62153	3.18464	3.28787	2.9975	2.89541	2.67589	2.53551	2.61579	1.76437	1.70451	1.64608	1.61033	1.22535	1.24006	1.27083	1.16173	1.18933	1.2807	1.35315	1.37077
2222.95	3.61264	3.17572	3.28672	2.97937	2.88783	2.66683	2.52565	2.60712	1.74628	1.69912	1.6468	1.61109	1.22158	1.23309	1.26355	1.15424	1.19183	1.28024	1.34664	1.35782
2224.34	3.59548	3.15711	3.26667	2.97694	2.86961	2.65771	2.51151	2.60194	1.73851	1.69395	1.63748	1.60067	1.20846	1.21761	1.25965	1.15591	1.18543	1.27845	1.33429	1.34537
2225.74	3.58286	3.13988	3.25001	2.99268	2.85572	2.6514	2.50588	2.59704	1.73777	1.68657	1.62938	1.59217	1.19966	1.21404	1.2567	1.15951	1.17356	1.27498	1.32518	1.33434
2227.13	3.57153	3.12158	3.24108	3.00144	2.84908	2.64829	2.50561	2.59506	1.73697	1.68068	1.62271	1.59276	1.20552	1.21729	1.25414	1.15793	1.16477	1.26667	1.32832	1.31939
2228.53	3.55617	3.10105	3.23295	2.98597	2.84064	2.6449	2.50603	2.59349	1.73199	1.68078	1.61396	1.59237	1.21324	1.21872	1.25406	1.14917	1.15404	1.25725	1.33517	1.31527
2229.92	3.55264	3.09553	3.23006	2.96441	2.83803	2.63732	2.50692	2.58753	1.72566	1.6818	1.60837	1.58373	1.20731	1.21321	1.25401	1.14223	1.14582	1.25712	1.33539	1.31848
2231.32	3.55073	3.09825	3.22995	2.94434	2.83726	2.62714	2.50572	2.57763	1.72054	1.66923	1.60012	1.56027	1.1908	1.20626	1.24796	1.13413	1.13938	1.26414	1.32915	1.31994
2232.71	3.54447	3.09601	3.22556	2.91796	2.83422	2.61473	2.49223	2.56974	1.71157	1.64506	1.59347	1.54438	1.1811	1.20442	1.23665	1.12462	1.13438	1.26551	1.32515	1.32063
2234.1	3.52041	3.08025	3.20464	2.91154	2.81648	2.59836	2.46639	2.55621	1.70984	1.63128	1.59066	1.53827	1.17893	1.20138	1.23253	1.12685	1.13534	1.25335	1.32506	1.32056
2235.5	3.49844	3.06751	3.18616	2.9313	2.80108	2.58203	2.45532	2.54411	1.71476	1.62583	1.58813	1.53297	1.17899	1.19434	1.23749	1.135	1.14039	1.24164	1.32383	1.31479
2236.89	3.49075	3.0693	3.17615	2.94369	2.80036	2.55337	2.46085	2.54192	1.71511	1.62367	1.57848	1.53199	1.17722	1.17435	1.23984	1.13192	1.13963	1.24636	1.31879	1.30685
2238.28	3.48466	3.07343	3.16535	2.92135	2.80282	2.53187	2.46443	2.54391	1.70119	1.63669	1.56585	1.53309	1.17459	1.16094	1.2272	1.10563	1.13304	1.25688	1.31222	1.30082
2239.67	3.47849	3.06616	3.1657	2.88867	2.79865	2.53721	2.45662	2.5422	1.68396	1.65351	1.56387	1.53372	1.1776	1.16609	1.20957	1.09033	1.12695	1.25201	1.3086	1.29445
2241.06	3.471	3.04302	3.17133	2.86836	2.77725	2.55067	2.44575	2.53229	1.67937	1.64649	1.56754	1.53489	1.18613	1.17287	1.20568	1.10326	1.11805	1.23725	1.30338	1.28886
2242.45	3.46247	3.027	3.16763	2.84851	2.76224	2.55431	2.43686	2.52591	1.67888	1.6225	1.5663	1.53568	1.1874	1.16936	1.20943	1.11759	1.1114	1.22808	1.29947	1.28657
2243.84	3.43726	3.01512	3.14033	2.83997	2.74378	2.55311	2.42635	2.52101	1.68036	1.60782	1.55095	1.5351	1.17937	1.16178	1.20952	1.11583	1.11278	1.21964	1.30159	1.28651
2245.24	3.41457	3.00343	3.11201	2.84465	2.72809	2.54626	2.41574	2.51523	1.68594	1.60576	1.53738	1.53223	1.17073	1.15715	1.2027	1.10507	1.11482	1.21203	1.30421	1.28551
2246.63	3.41004	2.99402	3.09885	2.8471	2.7239	2.52942	2.39453	2.50294	1.68875	1.60608	1.53952	1.52425	1.16391	1.15049	1.19394	1.09851	1.11194	1.20766	1.29531	1.28308
2248.01	3.40627	2.98564	3.08913	2.83773	2.71937	2.51614	2.37803	2.4832	1.67484	1.60802	1.54596	1.51282	1.15635	1.14585	1.18147	1.09167	1.0942	1.20279	1.27703	1.27851
2249.4	3.39518	2.97631	3.07825	2.82456	2.71012	2.50055	2.37143	2.47007	1.65547	1.61057	1.54193	1.50686	1.1493	1.14426	1.16858	1.08369	1.08332	1.19903	1.26764	1.26943
2250.79	3.3736	2.96101	3.05512	2.80927	2.69106	2.48311	2.36372	2.46028	1.65319	1.60631	1.52212	1.50479	1.13486	1.14141	1.16783	1.07378	1.08349	1.1971	1.26	1.26406
2252.18	3.35966	2.95339	3.04306	2.78631	2.68133	2.47573	2.35553	2.45063	1.66088	1.59473	1.51295	1.50218	1.12751	1.1398	1.17396	1.06443	1.08435	1.19456	1.25494	1.26546
2253.57	3.35021	2.95455	3.04472	2.77572	2.67943	2.46773	2.34141	2.42991	1.65821	1.57998	1.51382	1.49298	1.12313	1.137	1.17374	1.06515	1.0858	1.1832	1.25658	1.2664
2254.96	3.34242	2.95264	3.04741	2.7789	2.67806	2.46049	2.33299	2.41054	1.63124	1.55654	1.51468	1.47927	1.1202	1.13419	1.16311	1.07108	1.09	1.17296	1.25955	1.26434
2256.34	3.33149	2.92328	3.0392	2.77615	2.67	2.46006	2.32276	2.39998	1.60624	1.53774	1.50961	1.46729	1.12538	1.13025	1.15509	1.06882	1.08726	1.1742	1.25709	1.26221
2257.73	3.31173	2.87533	3.02259	2.75545	2.6556	2.45788	2.31532	2.38768	1.59959	1.53899	1.49984	1.45332	1.13405	1.12343	1.15635	1.05354	1.07624	1.17825	1.24882	1.25814
2259.12	3.29663	2.86742	3.01067	2.72944	2.65098	2.44484	2.31529	2.38411	1.59441	1.54483	1.49585	1.44865	1.13409	1.1123	1.15909	1.04186	1.06702	1.17862	1.24209	1.24872
2260.5	3.28132	2.89047	2.98463	2.72305	2.64625	2.42753	2.31187	2.3928	1.58464	1.54042	1.4878	1.45024	1.12425	1.1016	1.15509	1.04096	1.05923	1.17659	1.23223	1.24223
2261.89	3.26954	2.89844	2.968	2.73068	2.63886	2.41153	2.29198	2.39577	1.56975	1.52899	1.4814	1.45131	1.1149	1.0969	1.14419	1.04074	1.05229	1.17276	1.22535	1.23966
2263.28	3.24938	2.87679	2.96434	2.72785	2.61833	2.39149	2.25704	2.37875	1.56553	1.52406	1.47263	1.44908	1.09941	1.09371	1.13801	1.03708	1.0481	1.15885	1.22424	1.2355
2264.66	3.23127	2.85269	2.9631	2.70333	2.59524	2.37959	2.24132	2.3622	1.57588	1.52691	1.46441	1.44373	1.08575	1.09075	1.13677	1.0333	1.04415	1.14571	1.22202	1.23235
2266.05	3.22739	2.84067	2.95985	2.68376	2.58591	2.37178	2.23946	2.3633	1.58282	1.52734	1.46414	1.43351	1.087	1.08553	1.13447	1.02929	1.03992	1.14128	1.21749	1.22814
2267.43	3.22523	2.82784	2.95445	2.68068	2.58407	2.36576	2.2393	2.36689	1.56843	1.51568	1.46693	1.41821	1.0926	1.08092	1.12154	1.02076	1.03532	1.13554	1.2085	1.21828
2268.82	3.22266	2.80929	2.94549	2.67757	2.57667	2.36286	2.24171	2.36091	1.54608	1.49927	1.46558	1.41316	1.08912	1.08079	1.10284	1.01474	1.03329	1.13244	1.20224	1.20059
2270.2	3.21997	2.77846	2.91963	2.66315	2.55779	2.35953	2.24494	2.34417	1.54166	1.49144	1.46088	1.41551	1.07656	1.08243	1.09562	1.01356	1.0339	1.1308	1.20002	1.18817
2271.58	3.21346	2.76421	2.90011	2.63606	2.5467	2.35075	2.24292	2.33222	1.54857	1.48848	1.45643	1.41674	1.06713	1.08301	1.09369	1.01257	1.03465	1.12733	1.19706	1.18655
2272.97	3.18969	2.77855	2.88474	2.62308	2.54461	2.33507	2.23658	2.33021	1.54865	1.48937	1.45	1.41636	1.06263	1.08554	1.09354	1.01518	1.03112	1.11991	1.18957	1.18646
2274.35	3.16615	2.79287	2.87179	2.62646	2.54247	2.32557	2.23585	2.3293	1.53907	1.49624	1.4413	1.41487	1.05959	1.08393	1.09714	1.02112	1.02433	1.11411	1.18179	1.18203
2275.73	3.16118	2.78486	2.86986	2.62806	2.53824	2.325	2.24742	2.32401	1.53165	1.50126	1.42842	1.40323	1.05468	1.07703	1.09869	1.01838	1.02358	1.11697	1.17758	1.17324
2277.11	3.15986	2.76828	2.87155	2.61002	2.53419	2.32392	2.25093	2.317	1.53038	1.49234	1.41262	1.37978	1.04843	1.07043	1.08895	1.00586	1.02637	1.12363	1.17036	1.1693
2278.49	3.15291	2.75595	2.85998	2.5835	2.528	2.31657	2.23078	2.309	1.52998	1.47937	1.40648	1.36874	1.04986	1.06025	1.07513	0.998458	1.02501	1.12107	1.16784	1.16918
2279.87	3.14253	2.73972	2.82738	2.57505	2.50951	2.30629	2.20652	2.29883	1.53202	1.47	1.40584	1.36399	1.05718	1.04817	1.06947	1.00106	1.01725	1.10609	1.17017	1.16979
2281.26	3.13307	2.72336	2.80769	2.57379	2.49595	2.29503	2.19395	2.29122	1.53644	1.45687	1.4028	1.3616	1.05998	1.04528	1.06889	1.00303	1.01029	1.0956	1.17134	1.16975
2282.64	3.11315	2.69671	2.80549	2.57084	2.48917	2.28127	2.18163	2.28236	1.5345	1.44905	1.3959	1.36632	1.04951	1.04217	1.06655	0.991137	1.00926	1.0869	1.167	1.16848
2284.02	3.09362	2.67569	2.80356	2.56383	2.48199	2.27241	2.17476	2.27319	1.52296	1.44623	1.38977	1.37115	1.03874	1.04009	1.05891	0.97029	1.00979	1.08043	1.16071	1.16569
2285.4	3.08744	2.68596	2.78897	2.55848	2.46712	2.26245	2.16739	2.26307	1.51144	1.44401	1.38379	1.36576	1.03818	1.04123	1.05371	0.969776	1.00589	1.08792	1.15876	1.16082
2286.78	3.08426	2.70936	2.76787	2.55277	2.44865	2.25414	2.16113	2.25061	1.50272	1.45022	1.37656	1.35358	1.0399	1.04346	1.06592	0.986896	0.995485	1.10297	1.15757	1.1571
2288.15	3.0806	2.71125	2.76212	2.54195	2.44825	2.26057	2.15802	2.24571	1.49507	1.45944	1.37626	1.34465	1.04222	1.04456	1.08333	0.995785	0.988772	1.10317	1.15376	1.15257
2289.53	3.07713	2.6998	2.76749	2.53525	2.46259	2.27378	2.15393	2.24067	1.48994	1.45373	1.38074	1.33529	1.04676	1.04443	1.08046	0.995514	0.988297	1.09107	1.14469	1.14964
2290.91	3.07163	2.68394	2.76972	2.53323	2.46513	2.26517	2.14171	2.23624	1.48454	1.43655	1.38166	1.32903	1.04755	1.03718	1.06513	0.993633	0.988066	1.08163	1.13794	1.14662
2292.29	3.05179	2.64989	2.76852	2.52936	2.43978	2.23196	2.12078	2.22901	1.48026	1.42551	1.3735	1.3313	1.04427	1.02045	1.05704	0.97737	0.986647	1.08193	1.13772	1.14236
2293.67	3.03032	2.62144	2.76883	2.51863	2.41595	2.21319	2.10947	2.22314	1.47761	1.41837	1.36528	1.33509	1.03983	1.01009	1.05583	0.955334	0.986694	1.08327	1.138	1.14123
2295.04	3.01612	2.61966	2.7647	2.50891	2.4066	2.20446	2.10614	2.21736	1.47403	1.41144	1.3648	1.33275	1.02827	1.00307	1.05249	0.954812	0.984661	1.07459	1.13532	1.1386
2296.42	3.00114	2.62077	2.75298	2.496	2.39432	2.19943	2.10431	2.20737	1.46202	1.40342	1.36605	1.32609	1.01052	1.00204	1.04083	0.966358	0.977016	1.05967	1.12978	1.13491
2297.8	2.99172	2.61041	2.74184	2.47985	2.38789	2.20787	2.1025	2.1983	1.44812	1.3937	1.3622	1.32044	1.00215	1.01058	1.02734	0.969032	0.974085	1.04908	1.12693	1.12712
2299.17	2.98421	2.59218	2.72117	2.47846	2.3823	2.22005	2.10013	2.17384	1.4414	1.39177	1.35309	1.31363	0.994998	1.01735	1.02878	0.958106	0.973336	1.03636	1.1297	1.12024
2300.55	2.97619	2.58668	2.71101	2.48621	2.37852	2.21907	2.0924	2.16	1.4354	1.39397	1.34656	1.30809	0.993616	1.00444	1.03972	0.947361	0.972247	1.03158	1.13118	1.11147
2301.93	2.96635	2.6025	2.70379	2.48669	2.37869	2.2087	2.08027	2.16012	1.43482	1.39801	1.34192	1.30715	0.996353	0.978762	1.04529	0.941363	0.970819	1.03989	1.1246	1.10124
2303.3	2.96017	2.61696	2.69777	2.47459	2.37691	2.19783	2.07299	2.16184	1.44121	1.40978	1.3399	1.30706	0.997904	0.972613	1.04587	0.936903	0.967977	1.0475	1.11511	1.10053
2304.68	2.95972	2.61112	2.69355	2.46321	2.36939	2.17044	2.06458	2.15215	1.44376	1.41503	1.34249	1.30374	0.998684	0.979821	1.04528	0.93495	0.959041	1.03906	1.10398	1.10224
2306.05	2.95836	2.59663	2.68524	2.44992	2.36147	2.14676	2.05802	2.13467	1.43136	1.38945	1.34503	1.29858	0.999766	0.983742	1.03719	0.933509	0.942177	1.02435	1.08209	1.10277
2307.42	2.94832	2.58488	2.67018	2.43531	2.35363	2.13341	2.05194	2.12483	1.41635	1.36032	1.33415	1.29449	0.995024	0.980814	1.02828	0.930748	0.934933	1.02077	1.07859	1.10382
2308.8	2.92323	2.56798	2.64128	2.42785	2.33732	2.12284	2.04749	2.11446	1.40915	1.35994	1.29893	1.29002	0.982894	0.977362	1.01944	0.921197	0.935461	1.01835	1.09981	1.10296
2310.17	2.90627	2.55929	2.62803	2.41888	2.32247	2.11501	2.04656	2.10897	1.40214	1.37046	1.28376	1.28833	0.974961	0.972571	1.00565	0.914071	0.935626	1.01655	1.11365	1.09369
2311.54	2.89582	2.55167	2.63457	2.40668	2.30317	2.10924	2.04385	2.10039	1.40357	1.37172	1.28803	1.29709	0.965733	0.965504	1.00028	0.914768	0.930241	1.00731	1.09889	1.08242
2312.92	2.88692	2.54549	2.64041	2.39	2.28949	2.10883	2.03357	2.09503	1.41607	1.36035	1.29454	1.30695	0.959447	0.966242	1.00119	0.915666	0.923803	1.00144	1.07867	1.07837
2314.29	2.86886	2.53382	2.6288	2.38024	2.29196	2.11327	2.00785	2.09598	1.4217	1.35005	1.30348	1.29411	0.959192	0.97267	0.999413	0.919009	0.921898	1.00716	1.07508	1.07497
2315.66	2.84741	2.51587	2.61002	2.38135	2.29744	2.11494	1.99283	2.0949	1.40769	1.34271	1.31231	1.26386	0.959036	0.970665	0.987278	0.925308	0.921408	1.01391	1.07475	1.07477
2317.03	2.84026	2.50349	2.59808	2.38373	2.28891	2.10702	1.98793	2.08894	1.39166	1.33667	1.30549	1.25464	0.954951	0.951395	0.973341	0.919202	0.920476	1.01309	1.07289	1.0784
2318.4	2.83308	2.48942	2.58431	2.37187	2.26948	2.09974	1.98469	2.08061	1.3859	1.33756	1.28502	1.26018	0.945867	0.936263	0.978451	0.899775	0.923426	1.00702	1.06467	1.07837
2319.77	2.82992	2.48362	2.57444	2.3498	2.26101	2.09792	1.98584	2.07678	1.38129	1.34037	1.27124	1.2639	0.944102	0.94021	0.993191	0.88967	0.924195	1.0001	1.05978	1.06518
2321.14	2.82394	2.48017	2.56204	2.33802	2.26003	2.09604	1.98641	2.06977	1.37141	1.33908	1.26186	1.26	0.949712	0.947035	0.993643	0.892088	0.92015	0.989705	1.05956	1.05134
2322.51	2.81665	2.47447	2.55391	2.32953	2.26051	2.0891	1.98428	2.06398	1.35551	1.33383	1.25692	1.25201	0.952966	0.944102	0.980527	0.894772	0.916224	0.982551	1.05856	1.05116
2323.88	2.80425	2.45502	2.54991	2.32366	2.25858	2.0668	1.9834	2.05681	1.34553	1.32704	1.25347	1.24073	0.941303	0.933689	0.973854	0.894407	0.911312	0.984763	1.05726	1.05273
2325.25	2.79158	2.43253	2.54508	2.32287	2.25498	2.05055	1.98161	2.04821	1.34484	1.31379	1.24894	1.22632	0.926485	0.927824	0.976057	0.891647	0.902528	0.987909	1.05409	1.048
2326.62	2.78798	2.42606	2.54173	2.31983	2.2472	2.04058	1.97775	2.04268	1.34443	1.30318	1.24758	1.22032	0.927478	0.926682	0.976295	0.886273	0.894509	0.980334	1.04867	1.03669
2327.99	2.78526	2.42428	2.53965	2.31046	2.2306	2.03452	1.97193	2.03373	1.34539	1.30665	1.2495	1.21924	0.934712	0.926977	0.970692	0.876761	0.880157	0.966812	1.03573	1.02948
2329.36	2.78176	2.42164	2.5354	2.30079	2.22209	2.02856	1.96159	2.02552	1.34929	1.31352	1.24687	1.21745	0.935486	0.929289	0.963716	0.872874	0.873035	0.965975	1.02612	1.02787
2330.73	2.76971	2.41123	2.52883	2.29755	2.21892	2.02113	1.94998	2.01692	1.34561	1.30945	1.23739	1.21011	0.932568	0.930949	0.958497	0.877118	0.876489	0.980494	1.02149	1.02818
2332.09	2.75744	2.40287	2.51698	2.29593	2.21534	2.01649	1.94161	2.01002	1.33347	1.2942	1.2313	1.20403	0.929279	0.92683	0.952389	0.879459	0.878614	0.98874	1.01918	1.02867
2333.46	2.73957	2.39997	2.48783	2.2889	2.19667	2.00976	1.93181	1.99178	1.32769	1.28305	1.22259	1.20681	0.919851	0.920331	0.948233	0.872911	0.872718	0.976875	1.0221	1.02749
2334.83	2.72295	2.39859	2.46336	2.26902	2.17751	2.0044	1.92506	1.97385	1.33243	1.27867	1.21411	1.21085	0.910766	0.916437	0.94719	0.865765	0.866252	0.963144	1.02705	1.02604
2336.19	2.715	2.39297	2.46737	2.25187	2.16125	1.98822	1.9208	1.96876	1.33551	1.27648	1.21506	1.20861	0.913447	0.911201	0.947003	0.857879	0.864149	0.960094	1.02881	1.02288
2337.56	2.70709	2.38218	2.47842	2.24407	2.13421	1.97542	1.91112	1.96351	1.32619	1.27256	1.2178	1.2021	0.920517	0.905316	0.945685	0.845271	0.862257	0.956564	1.02887	1.01795
2338.93	2.70325	2.37376	2.47425	2.23593	2.13273	1.97829	1.88821	1.96347	1.31321	1.26615	1.2143	1.19801	0.919775	0.898244	0.943976	0.841827	0.861738	0.951401	1.02682	1.01128
2340.29	2.68698	2.3567	2.4496	2.234	2.14842	1.98454	1.86968	1.96382	1.30761	1.25912	1.20179	1.19424	0.915662	0.892804	0.943322	0.846146	0.858433	0.939807	1.01838	1.00534
2341.66	2.6709	2.34628	2.43513	2.2353	2.15743	1.97591	1.86836	1.96197	1.30474	1.25124	1.19618	1.18855	0.911634	0.892975	0.943715	0.848012	0.85669	0.935467	1.00966	0.998137
2343.02	2.64494	2.33432	2.42612	2.22572	2.1574	1.95493	1.86904	1.94148	1.29877	1.24676	1.19921	1.17861	0.906907	0.894398	0.939509	0.847103	0.857611	0.942268	1.00503	0.990547
2344.39	2.62468	2.32229	2.41569	2.20029	2.15314	1.94294	1.86105	1.92296	1.28704	1.24369	1.20244	1.16619	0.902809	0.88858	0.922962	0.844562	0.856963	0.948044	0.998951	0.987964
2345.75	2.62415	2.30888	2.39959	2.18193	2.13354	1.93071	1.83818	1.917	1.2792	1.24173	1.19884	1.16085	0.900335	0.87104	0.911155	0.83481	0.850778	0.939304	0.990075	0.982268
2347.11	2.62665	2.29027	2.38231	2.17244	2.10473	1.9223	1.82467	1.91073	1.27475	1.24002	1.19173	1.15739	0.898533	0.860574	0.910246	0.823748	0.841367	0.924709	0.977501	0.980879
2348.48	2.61658	2.27366	2.37963	2.16274	2.09099	1.91382	1.81125	1.90715	1.27047	1.23794	1.18492	1.15693	0.89636	0.859432	0.908636	0.820845	0.836485	0.922006	0.972877	0.982725
2349.84	2.58756	2.24963	2.37917	2.15374	2.07782	1.90634	1.79971	1.89564	1.26613	1.23376	1.16873	1.16038	0.890739	0.859306	0.903738	0.821164	0.83013	0.922682	0.977355	0.981634
2351.2	2.57712	2.24132	2.37603	2.14389	2.0685	1.89724	1.79603	1.89203	1.25808	1.2264	1.15899	1.16205	0.885694	0.858279	0.896824	0.82029	0.824165	0.921957	0.980197	0.970604
2352.56	2.57257	2.24348	2.34551	2.14055	2.05166	1.88485	1.79086	1.89289	1.25122	1.21734	1.14473	1.15684	0.874557	0.856675	0.892287	0.818399	0.814788	0.914751	0.968146	0.958567
2353.93	2.5697	2.24351	2.32285	2.13973	2.03689	1.87478	1.78927	1.89122	1.24479	1.20332	1.13515	1.1493	0.863717	0.85711	0.88566	0.816315	0.810282	0.907644	0.949608	0.95796
2355.29	2.55992	2.2421	2.31995	2.1373	2.03035	1.85592	1.78637	1.87765	1.24004	1.19314	1.13782	1.14073	0.848005	0.860173	0.877683	0.80925	0.816068	0.899494	0.940594	0.958798
2356.65	2.54365	2.24165	2.31724	2.12259	2.02699	1.84516	1.78259	1.86082	1.23168	1.18835	1.14141	1.12458	0.832966	0.855849	0.871453	0.802743	0.821837	0.891826	0.931913	0.956468
2358.01	2.52325	2.23421	2.30869	2.10579	2.02427	1.84104	1.77459	1.84832	1.22448	1.18443	1.13905	1.1143	0.835929	0.840125	0.868725	0.79768	0.821409	0.890879	0.932204	0.950999
2359.37	2.49394	2.21836	2.29387	2.0904	2.02079	1.84068	1.76929	1.83036	1.2241	1.18305	1.1369	1.10394	0.846126	0.832539	0.867694	0.790188	0.818024	0.890758	0.94459	0.948046
2360.73	2.48899	2.20944	2.28655	2.07371	2.0169	1.83573	1.76612	1.827	1.22467	1.1823	1.13756	1.09865	0.848582	0.837033	0.865636	0.788111	0.816549	0.889195	0.952705	0.944325
2362.09	2.49139	2.1963	2.2845	2.06476	2.00448	1.82734	1.75976	1.83353	1.21861	1.17693	1.14096	1.10437	0.847195	0.838934	0.86198	0.788656	0.812612	0.881192	0.952239	0.939855
2363.45	2.49064	2.18231	2.28032	2.05527	1.99948	1.82715	1.74685	1.83445	1.2042	1.16781	1.14165	1.11008	0.843963	0.830259	0.856645	0.790232	0.806594	0.875476	0.949964	0.936313
2364.81	2.47217	2.15435	2.26171	2.05328	1.99582	1.82974	1.72878	1.80568	1.19781	1.16279	1.12911	1.09912	0.836497	0.816052	0.854071	0.794985	0.79916	0.869317	0.942804	0.931317
2366.17	2.45171	2.13003	2.24452	2.05762	1.99002	1.82358	1.71654	1.77665	1.19803	1.15894	1.11468	1.07718	0.830922	0.812209	0.852947	0.797359	0.792823	0.863168	0.92966	0.928455
2367.52	2.43549	2.12663	2.24056	2.05751	1.97912	1.79888	1.7039	1.77314	1.1977	1.15649	1.10289	1.0699	0.829926	0.8122	0.851066	0.78922	0.789073	0.860338	0.92257	0.923323
2368.88	2.41559	2.1278	2.23605	2.04205	1.95967	1.77703	1.70063	1.77437	1.19235	1.1563	1.08927	1.06955	0.827976	0.813466	0.849902	0.777349	0.786002	0.857931	0.919103	0.918787
2370.24	2.41168	2.12862	2.22314	2.02198	1.94209	1.76185	1.70822	1.76899	1.18552	1.15527	1.08839	1.06899	0.824615	0.819479	0.850195	0.768153	0.784319	0.854295	0.91556	0.906405
2371.6	2.41279	2.12763	2.19465	2.00749	1.92239	1.75103	1.71292	1.75041	1.17859	1.14863	1.09282	1.05853	0.815906	0.822699	0.841987	0.760351	0.780853	0.848549	0.90768	0.897704
2372.95	2.4068	2.12243	2.17656	1.99204	1.91679	1.75348	1.7061	1.74492	1.16808	1.13701	1.09318	1.05047	0.810511	0.814985	0.826169	0.757485	0.778914	0.847801	0.90229	0.901129
2374.31	2.37384	2.10706	2.16964	1.98082	1.91723	1.76368	1.69608	1.75492	1.16418	1.13392	1.08097	1.05395	0.805532	0.804936	0.825396	0.75798	0.778396	0.848294	0.904751	0.9047
2375.67	2.35147	2.09399	2.1641	1.97122	1.91707	1.76314	1.68879	1.76101	1.16467	1.13853	1.07198	1.05729	0.800729	0.800217	0.839158	0.758256	0.776413	0.848527	0.907007	0.898529
2377.02	2.35969	2.089	2.15329	1.96503	1.91212	1.75003	1.67847	1.74453	1.16506	1.13869	1.06931	1.04934	0.797958	0.7974	0.844389	0.755239	0.768807	0.847525	0.899182	0.884191
2378.38	2.36996	2.08545	2.14408	1.96376	1.90403	1.74311	1.66583	1.72267	1.16518	1.1286	1.06712	1.02709	0.796182	0.794367	0.833628	0.752158	0.760208	0.845701	0.882134	0.880844
2379.73	2.36196	2.07853	2.1473	1.96265	1.89792	1.74074	1.64863	1.71725	1.16485	1.11979	1.06783	1.02252	0.793868	0.788934	0.823342	0.750064	0.754872	0.843145	0.875775	0.882219
2381.09	2.34501	2.06647	2.15528	1.95256	1.89261	1.73863	1.63333	1.71445	1.15537	1.11651	1.06835	1.03753	0.791245	0.785323	0.817879	0.747699	0.747331	0.838243	0.874118	0.881313
2382.44	2.3341	2.0537	2.15022	1.93848	1.88504	1.72814	1.619	1.70808	1.14265	1.1133	1.06645	1.04761	0.789302	0.782454	0.81333	0.745257	0.744442	0.836964	0.873508	0.875392
2383.8	2.31421	2.03445	2.1277	1.93259	1.8685	1.71469	1.60801	1.69719	1.13845	1.10416	1.05639	1.04515	0.78541	0.779083	0.810023	0.741573	0.740158	0.838286	0.877511	0.870093
2385.15	2.30212	2.02107	2.11547	1.92944	1.85985	1.70419	1.60356	1.68879	1.13584	1.0883	1.05076	1.03991	0.781461	0.772566	0.805833	0.739276	0.737884	0.837432	0.881747	0.869694
2386.5	2.294	2.00756	2.1131	1.91783	1.85215	1.69222	1.59961	1.68028	1.12887	1.07731	1.05255	1.03069	0.767052	0.763183	0.801661	0.737361	0.737741	0.832724	0.875765	0.869719
2387.86	2.28332	1.99882	2.10822	1.89425	1.84437	1.68625	1.59291	1.67404	1.11305	1.068	1.05259	1.01584	0.753286	0.758902	0.793701	0.734724	0.73713	0.828608	0.863338	0.86845
2389.21	2.26103	1.9983	2.09517	1.87997	1.83944	1.67665	1.58058	1.67348	1.1011	1.06165	1.03426	1.00987	0.751741	0.753643	0.787441	0.726075	0.733614	0.821425	0.860252	0.865159
2390.56	2.23484	1.99682	2.07747	1.88201	1.83416	1.67101	1.57972	1.67324	1.10074	1.06159	1.00749	1.00766	0.753741	0.753272	0.78365	0.719048	0.729425	0.811816	0.857387	0.862331
2391.91	2.23409	1.99126	2.05927	1.88441	1.82656	1.66147	1.59026	1.66634	1.10218	1.06208	1.00271	1.00633	0.753607	0.759607	0.77999	0.718893	0.730472	0.809937	0.852054	0.856043
2393.26	2.2474	1.975	2.03614	1.87817	1.80829	1.65103	1.59395	1.65095	1.1017	1.06043	1.0074	1.00259	0.750334	0.761973	0.783264	0.719417	0.733298	0.804881	0.84043	0.849923
2394.62	2.24995	1.96199	2.02776	1.86823	1.79656	1.64784	1.58236	1.64434	1.10021	1.05709	1.0104	0.998522	0.749079	0.755693	0.788159	0.717493	0.73299	0.799295	0.831247	0.844477
2395.97	2.23015	1.94068	2.0272	1.86582	1.78799	1.6482	1.56881	1.64684	1.09877	1.05854	1.01767	0.984955	0.746526	0.74935	0.786847	0.712251	0.729027	0.785493	0.830015	0.83907
2397.32	2.21137	1.92962	2.026	1.86705	1.78307	1.64711	1.55806	1.64832	1.09781	1.06476	1.02138	0.966436	0.744211	0.746811	0.781709	0.706453	0.726963	0.777326	0.8309	0.838368
2398.67	2.20035	1.93512	2.02079	1.86067	1.77749	1.64288	1.54586	1.63722	1.09187	1.06196	1.01548	0.969057	0.747381	0.745172	0.776033	0.699012	0.726872	0.783692	0.831353	0.838798
2400.02	2.19123	1.94222	2.01245	1.84102	1.76959	1.63797	1.54188	1.62341	1.07363	1.04306	1.00593	0.981472	0.7503	0.744215	0.76908	0.695192	0.724893	0.791274	0.829509	0.834594
2401.37	2.1806	1.94076	1.99331	1.82204	1.75538	1.62304	1.54064	1.61084	1.05954	1.02927	0.992194	0.981438	0.741659	0.742469	0.763739	0.699515	0.710616	0.7875	0.827866	0.820882
2402.72	2.16825	1.93308	1.96658	1.81237	1.73593	1.60885	1.53113	1.59168	1.05652	1.03102	0.975293	0.967738	0.726811	0.738733	0.756525	0.703702	0.689948	0.777822	0.824256	0.815018
2404.06	2.15958	1.92697	1.96146	1.80876	1.7319	1.59757	1.50843	1.57921	1.0546	1.0351	0.971749	0.95844	0.722533	0.732323	0.748732	0.694565	0.687225	0.770778	0.822714	0.818526
2405.41	2.13998	1.91768	1.96869	1.80872	1.73574	1.58944	1.49237	1.5648	1.05262	1.03594	0.975134	0.953481	0.724042	0.726627	0.750887	0.680589	0.688243	0.761567	0.826435	0.819445
2406.76	2.13226	1.90377	1.97137	1.80713	1.73602	1.58811	1.48895	1.56286	1.05105	1.03288	0.976742	0.949927	0.723788	0.720458	0.759012	0.678406	0.687991	0.756509	0.828047	0.806941
2408.11	2.13311	1.87332	1.96448	1.80124	1.7283	1.5896	1.48766	1.5757	1.04951	1.02541	0.976726	0.947034	0.724287	0.714924	0.755018	0.682667	0.683813	0.760371	0.811332	0.789816
2409.46	2.13316	1.85513	1.95704	1.78954	1.71865	1.58226	1.49702	1.58537	1.0437	1.01549	0.976331	0.941248	0.723415	0.714111	0.736059	0.683131	0.68256	0.763714	0.784539	0.790629
2410.8	2.12315	1.8596	1.94171	1.77291	1.70309	1.56111	1.5113	1.57345	1.03836	1.00788	0.971417	0.93828	0.711511	0.712624	0.727548	0.677615	0.684505	0.756437	0.782139	0.798324
2412.15	2.11217	1.86391	1.9232	1.74779	1.68773	1.55078	1.5061	1.55306	1.03233	1.00109	0.965581	0.932389	0.699018	0.713831	0.732672	0.674078	0.686257	0.747286	0.791689	0.802956
2413.5	2.10879	1.85162	1.90788	1.73085	1.68743	1.54525	1.48489	1.53892	1.02794	0.995852	0.962222	0.929628	0.699722	0.719988	0.734774	0.674401	0.687561	0.743773	0.794983	0.806188
2414.84	2.09941	1.82601	1.88483	1.73416	1.69313	1.54197	1.47298	1.52415	1.0303	0.998943	0.955007	0.934748	0.702084	0.719854	0.732243	0.675042	0.687721	0.738544	0.789939	0.804463
2416.19	2.08708	1.81142	1.87991	1.74175	1.68756	1.53589	1.47183	1.51655	1.03241	1.0055	0.949388	0.937886	0.703132	0.70687	0.728847	0.66616	0.687327	0.737779	0.78724	0.789399
2417.53	2.05992	1.80112	1.88125	1.73356	1.66226	1.53069	1.46835	1.50301	1.0265	0.998621	0.942144	0.932018	0.70371	0.695205	0.728714	0.653253	0.685659	0.741143	0.792307	0.774887
2418.88	2.04264	1.79485	1.88271	1.71253	1.64923	1.53129	1.4521	1.49725	1.01593	0.981549	0.938632	0.924643	0.702814	0.68785	0.732608	0.648626	0.680874	0.739509	0.797593	0.772973
2420.22	2.03277	1.78724	1.88745	1.70169	1.64713	1.53275	1.43332	1.4916	1.01418	0.971476	0.937417	0.917512	0.690877	0.681465	0.730403	0.646838	0.66823	0.723128	0.791741	0.771321
2421.57	2.02611	1.78126	1.89029	1.69971	1.64466	1.52855	1.42674	1.48741	1.02051	0.966905	0.935973	0.905698	0.682114	0.683557	0.717468	0.646258	0.657032	0.710771	0.777781	0.76852
2422.91	2.02556	1.77166	1.87346	1.69761	1.62843	1.50987	1.42116	1.48616	1.02088	0.964589	0.921522	0.899413	0.689576	0.686721	0.707249	0.645934	0.647186	0.714023	0.771873	0.765328
2424.25	2.02517	1.76202	1.8478	1.69225	1.60696	1.49581	1.41677	1.48482	1.00989	0.964622	0.903606	0.891197	0.700522	0.682439	0.702259	0.645059	0.640083	0.719992	0.762564	0.761571
2425.6	2.01196	1.76626	1.83466	1.68806	1.60038	1.48001	1.4118	1.47923	0.999727	0.964923	0.904375	0.887309	0.702393	0.671115	0.699528	0.639164	0.642924	0.720063	0.75733	0.753752
2426.94	1.98747	1.77162	1.82281	1.68521	1.59872	1.47022	1.40462	1.46394	0.994871	0.961811	0.908499	0.882073	0.69872	0.667162	0.6953	0.632934	0.647724	0.716924	0.753542	0.752028
2428.28	1.97821	1.7663	1.81731	1.68104	1.59954	1.46673	1.39237	1.46184	0.990573	0.958228	0.908583	0.878857	0.690215	0.671051	0.69018	0.626934	0.645842	0.715185	0.751164	0.764055
2429.63	1.97819	1.747	1.8051	1.67144	1.60068	1.46503	1.38124	1.468	0.98129	0.946584	0.901466	0.881701	0.666678	0.672401	0.692189	0.620824	0.639873	0.710964	0.750037	0.775658
2430.97	1.97376	1.7336	1.80138	1.65615	1.59754	1.46081	1.37057	1.46832	0.968578	0.92581	0.896202	0.885631	0.653842	0.666774	0.696078	0.62243	0.636364	0.708842	0.746553	0.768256
2432.31	1.94219	1.72755	1.78638	1.64745	1.57697	1.45168	1.35869	1.45155	0.96575	0.92097	0.884607	0.883342	0.655388	0.660354	0.693045	0.629365	0.630923	0.705556	0.738794	0.749927
2433.65	1.91827	1.72238	1.77286	1.64209	1.56078	1.44297	1.34812	1.43497	0.970344	0.929526	0.875771	0.874056	0.658825	0.652913	0.682103	0.630736	0.627778	0.70192	0.729652	0.744499
2434.99	1.92047	1.71155	1.76096	1.63426	1.56063	1.42928	1.33619	1.42313	0.972863	0.934286	0.876321	0.871351	0.657343	0.641644	0.675504	0.623659	0.625674	0.693054	0.73034	0.742437
2436.33	1.92369	1.69843	1.744	1.62365	1.56257	1.41611	1.33449	1.41176	0.971729	0.934859	0.877898	0.866825	0.653767	0.637321	0.675809	0.616629	0.622498	0.682492	0.741082	0.740588
2437.67	1.91775	1.69193	1.74327	1.61598	1.55694	1.39528	1.33863	1.40849	0.970361	0.933406	0.879037	0.865594	0.650529	0.635792	0.677116	0.607909	0.616643	0.683849	0.745022	0.731053
2439.01	1.9027	1.68652	1.74768	1.61574	1.53818	1.38437	1.34322	1.40536	0.965651	0.91851	0.879291	0.861224	0.645523	0.636698	0.671995	0.586168	0.608345	0.688555	0.738642	0.725037
2440.35	1.89647	1.68005	1.74342	1.61668	1.53032	1.38388	1.34932	1.40568	0.958217	0.900722	0.877353	0.857791	0.644881	0.639783	0.663805	0.539928	0.60618	0.689273	0.733182	0.720797
2441.69	1.89635	1.66664	1.7252	1.60343	1.51997	1.38504	1.34957	1.40875	0.947119	0.89665	0.869359	0.855965	0.641353	0.640484	0.659898	0.45773	0.600721	0.683348	0.730475	0.714868
2443.03	1.89214	1.65554	1.71437	1.58163	1.51084	1.38527	1.33474	1.40874	0.930663	0.896508	0.861055	0.852524	0.639241	0.636215	0.657063	0.328134	0.580446	0.680844	0.72638	0.716511
2444.37	1.86868	1.64315	1.71233	1.57271	1.4969	1.38312	1.31754	1.39309	0.919708	0.895158	0.844619	0.84746	0.631294	0.630511	0.658364	0.139717	0.533851	0.678477	0.720605	0.718623
2445.7	1.84994	1.63506	1.71243	1.56897	1.48797	1.38015	1.30683	1.37647	0.914374	0.893393	0.829844	0.834465	0.624948	0.623948	0.663334	-0.118928	0.449452	0.676121	0.71186	0.717174
2447.04	1.84776	1.63487	1.71364	1.56316	1.4938	1.37384	1.28412	1.36319	0.909276	0.892194	0.824208	0.827475	0.625416	0.607622	0.66507	-0.459187	0.315779	0.669037	0.709486	0.711041
2448.38	1.84744	1.63579	1.71265	1.55508	1.50196	1.36819	1.22896	1.34987	0.902305	0.889134	0.82164	0.822045	0.626973	0.571969	0.657991	-0.892431	0.121385	0.658759	0.708399	0.706245
2449.72	1.84018	1.6308	1.70223	1.543	1.49636	1.35844	1.12096	1.34637	0.897098	0.884143	0.824265	0.817751	0.628104	0.507435	0.648672	-1.43001	-0.145165	0.657999	0.707801	0.699274
2451.05	1.82063	1.61549	1.68426	1.52245	1.47852	1.33346	0.93974	1.34477	0.89486	0.875844	0.830782	0.812093	0.625527	0.404486	0.640677	-2.08327	-0.495283	0.661504	0.703054	0.695701
2452.39	1.80915	1.60284	1.67134	1.47855	1.46978	1.28207	0.664956	1.33785	0.887639	0.855709	0.828773	0.808321	0.619851	0.2536	0.623856	-2.86351	-0.940367	0.659254	0.698381	0.698999
2453.72	1.79141	1.58258	1.64868	1.39598	1.46068	1.19314	0.2763	1.32374	0.867078	0.814892	0.820433	0.805058	0.607431	0.0452692	0.587447	-3.78204	-1.49179	0.648549	0.697289	0.700792

## Sheet: Finger 660 nm
2753.02	15.8701	30.6766	16.4745	12.1455	10.6699	10.444	9.65998	8.90892	8.3067	7.88212
2754.91	16.0267	30.7843	16.5035	12.1592	10.6967	10.442	9.67645	8.92708	8.31852	7.88807
2756.8	16.1281	30.8457	16.518	12.1806	10.7246	10.436	9.70571	8.94897	8.31133	7.87923
2758.7	16.2026	30.8678	16.546	12.2066	10.7552	10.4279	9.72045	8.95837	8.30032	7.86912
2760.59	16.2619	30.8908	16.5893	12.2162	10.7655	10.4341	9.7143	8.95709	8.29157	7.86231
2762.48	16.2936	30.9249	16.6112	12.2125	10.7556	10.4589	9.70476	8.9587	8.29175	7.866
2764.37	16.3275	30.9304	16.6131	12.2104	10.7439	10.476	9.69668	8.95892	8.29977	7.87957
2766.26	16.366	30.9258	16.6165	12.2089	10.7326	10.4756	9.69926	8.96308	8.30677	7.89118
2768.15	16.3705	30.9354	16.6159	12.2194	10.73	10.4707	9.71313	8.97544	8.29773	7.89364
2770.04	16.3425	30.9344	16.6181	12.2403	10.7372	10.4675	9.72378	8.98589	8.27557	7.89117
2771.93	16.3121	30.9191	16.6275	12.2536	10.7434	10.46	9.72012	8.97952	8.26204	7.89205
2773.82	16.2929	30.906	16.6356	12.248	10.7326	10.4462	9.70731	8.95835	8.2575	7.88323
2775.7	16.2908	30.9018	16.6195	12.2328	10.7093	10.4389	9.69827	8.94087	8.25111	7.86014
2777.59	16.2972	30.8993	16.582	12.2228	10.6964	10.4309	9.68321	8.91836	8.24873	7.84521
2779.48	16.3025	30.8942	16.5534	12.1913	10.6872	10.4142	9.65605	8.88398	8.25074	7.84497
2781.36	16.2951	30.8989	16.5212	12.1381	10.6709	10.4057	9.63791	8.86239	8.25043	7.84656
2783.25	16.2813	30.8559	16.4766	12.1087	10.6648	10.4004	9.63081	8.86302	8.24874	7.84597
2785.13	16.2769	30.7658	16.4532	12.1071	10.6646	10.3876	9.62284	8.87126	8.23021	7.83434
2787.02	16.2697	30.715	16.455	12.1091	10.658	10.3825	9.62007	8.88059	8.19682	7.81325
2788.9	16.2541	30.7131	16.4605	12.111	10.6539	10.3783	9.61039	8.87568	8.17998	7.79908
2790.78	16.2459	30.7141	16.4656	12.0946	10.6455	10.3646	9.58738	8.85655	8.17938	7.79153
2792.66	16.2268	30.712	16.4398	12.0644	10.6269	10.3559	9.57154	8.84611	8.17738	7.78333
2794.55	16.195	30.6592	16.3868	12.0474	10.6107	10.3511	9.56008	8.84466	8.1763	7.7778
2796.43	16.1776	30.5675	16.3548	12.0377	10.5906	10.3426	9.5439	8.84024	8.17808	7.78283
2798.31	16.1566	30.5128	16.332	12.0254	10.5642	10.3363	9.53367	8.83582	8.17996	7.79514
2800.19	16.126	30.4838	16.2999	12.0206	10.5488	10.3397	9.54217	8.83487	8.17913	7.80261
2802.07	16.1119	30.448	16.2832	12.0312	10.5563	10.349	9.5622	8.83538	8.18727	7.8069
2803.95	16.1052	30.426	16.3006	12.0472	10.5756	10.3522	9.5746	8.83425	8.20535	7.81303
2805.82	16.0953	30.4152	16.3328	12.0536	10.5858	10.3578	9.58414	8.83712	8.21629	7.81485
2807.7	16.0923	30.4024	16.3486	12.0554	10.6041	10.3721	9.59879	8.84573	8.22295	7.82466
2809.58	16.1017	30.388	16.3544	12.0599	10.6362	10.3821	9.60739	8.85065	8.23328	7.84582
2811.46	16.1142	30.3838	16.3632	12.0632	10.6545	10.3914	9.61626	8.86043	8.24101	7.8619
2813.33	16.1187	30.3888	16.3652	12.08	10.653	10.4063	9.63248	8.87925	8.26053	7.87758
2815.21	16.1397	30.388	16.3744	12.1072	10.6474	10.4182	9.64588	8.89212	8.29419	7.89943
2817.08	16.1752	30.4036	16.3957	12.1243	10.6452	10.4385	9.67041	8.9123	8.32169	7.91925
2818.96	16.1956	30.4354	16.4119	12.145	10.6708	10.469	9.70961	8.94547	8.35723	7.94747
2820.83	16.2231	30.4507	16.4463	12.1741	10.7186	10.4906	9.74257	8.97159	8.402	7.98596
2822.7	16.2624	30.4781	16.4994	12.1969	10.7554	10.5092	9.77219	8.99401	8.42823	8.01935
2824.57	16.2879	30.5252	16.5384	12.2275	10.7827	10.5339	9.80582	9.02148	8.44346	8.05419
2826.45	16.3138	30.5595	16.5653	12.2664	10.8126	10.5561	9.83483	9.04755	8.4621	8.09556
2828.32	16.3505	30.5974	16.5925	12.2965	10.8422	10.5896	9.8707	9.08353	8.48096	8.13574
2830.19	16.391	30.6421	16.6169	12.3287	10.8748	10.6374	9.9153	9.13085	8.52228	8.17914
2832.06	16.4674	30.6674	16.6504	12.3686	10.9126	10.6819	9.95223	9.17341	8.58457	8.22866
2833.93	16.5654	30.6886	16.6951	12.4094	10.9514	10.7336	9.98903	9.22268	8.64185	8.2792
2835.8	16.6421	30.7173	16.7395	12.4835	11.0094	10.7997	10.0351	9.2833	8.70984	8.34709
2837.66	16.7051	30.7458	16.8134	12.579	11.0848	10.8699	10.0857	9.34072	8.79292	8.4311
2839.53	16.7704	30.8132	16.9093	12.6575	11.1556	10.9605	10.1657	9.40759	8.87274	8.5128
2841.4	16.8398	30.9064	16.9883	12.7315	11.2366	11.0709	10.2728	9.48864	8.9641	8.6085
2843.27	16.9385	30.9767	17.0576	12.8137	11.3334	11.1782	10.377	9.5693	9.07201	8.72116
2845.13	17.0563	31.0456	17.1326	12.9028	11.4324	11.2938	10.4904	9.68234	9.18502	8.83582
2847	17.1682	31.1217	17.2142	13.0253	11.5486	11.4201	10.6188	9.82284	9.32245	8.96523
2848.86	17.2998	31.1865	17.3456	13.1702	11.6807	11.5412	10.7476	9.94945	9.47714	9.10798
2850.73	17.4434	31.275	17.5102	13.3109	11.8099	11.6665	10.8842	10.0701	9.62293	9.24908
2852.59	17.5711	31.3834	17.6572	13.464	11.9419	11.7996	11.0283	10.1961	9.7705	9.39626
2854.45	17.6998	31.482	17.8046	13.6207	12.0802	11.9323	11.1678	10.3224	9.92129	9.54624
2856.32	17.8311	31.6111	17.9569	13.7577	12.2195	12.0813	11.3084	10.4572	10.0641	9.68604
2858.18	17.9545	31.7648	18.0961	13.8821	12.3715	12.2426	11.4523	10.6012	10.2017	9.82112
2860.04	18.0928	31.9098	18.2422	14.0099	12.5322	12.3958	11.5948	10.748	10.3431	9.96163
2861.9	18.243	32.0857	18.3938	14.1547	12.6878	12.5486	11.7446	10.9114	10.4965	10.1164
2863.76	18.394	32.2677	18.5345	14.3346	12.8441	12.7087	11.905	11.0886	10.68	10.3129
2865.62	18.5821	32.4022	18.6884	14.5313	13.0089	12.8776	12.0744	11.2659	10.8793	10.5286
2867.48	18.7845	32.5325	18.8561	14.7227	13.1878	13.0796	12.2774	11.4592	11.0724	10.7268
2869.34	18.9631	32.6684	19.0262	14.929	13.4073	13.2999	12.497	11.6608	11.2768	10.9237
2871.2	19.1397	32.8028	19.2278	15.1397	13.6394	13.508	12.6992	11.8504	11.4782	11.1137
2873.06	19.3122	33.0183	19.4362	15.3401	13.839	13.7278	12.9041	12.0409	11.6526	11.2813
2874.91	19.4695	33.248	19.6103	15.5555	14.0287	13.9399	13.1025	12.227	11.8223	11.4482
2876.77	19.6326	33.3925	19.7759	15.7535	14.2089	14.1058	13.2691	12.3945	11.9811	11.6058
2878.63	19.7856	33.5315	19.9307	15.902	14.3683	14.2552	13.4291	12.5655	12.1163	11.7405
2880.48	19.909	33.6674	20.0622	16.048	14.5396	14.3863	13.5746	12.7227	12.2521	11.8794
2882.34	20.028	33.7772	20.2039	16.169	14.6934	14.4813	13.6842	12.8372	12.3696	11.9983
2884.19	20.1346	33.9238	20.3333	16.2362	14.7871	14.5653	13.7816	12.9401	12.445	12.0667
2886.04	20.2198	34.065	20.4193	16.2853	14.8682	14.6386	13.8661	13.0331	12.5094	12.1199
2887.9	20.3157	34.1381	20.5034	16.3292	14.9391	14.6932	13.9317	13.1073	12.5695	12.1667
2889.75	20.4022	34.1741	20.5792	16.3824	14.9859	14.748	14.0094	13.1859	12.6273	12.2134
2891.6	20.4525	34.2078	20.6314	16.4711	15.0266	14.8008	14.0831	13.2613	12.6938	12.2825
2893.45	20.4796	34.2595	20.6867	16.5566	15.0666	14.8489	14.1318	13.3202	12.7583	12.3532
2895.3	20.5079	34.309	20.7418	16.6117	15.113	14.9182	14.1897	13.3782	12.8136	12.4088
2897.15	20.5647	34.3613	20.7947	16.6758	15.1866	14.9891	14.2469	13.4332	12.8773	12.4769
2899	20.6643	34.4302	20.8745	16.7421	15.2634	15.0439	14.2921	13.4854	12.9417	12.5503
2900.85	20.7646	34.5197	20.9563	16.8078	15.3222	15.1183	14.359	13.5572	13.0112	12.6245
2902.7	20.8483	34.6062	21.0221	16.8908	15.3908	15.201	14.4306	13.6336	13.116	12.7181
2904.55	20.9781	34.6644	21.11	16.9765	15.4623	15.2875	14.5007	13.7083	13.2298	12.8225
2906.4	21.1053	34.6991	21.2017	17.0622	15.5371	15.4182	14.6189	13.8178	13.3332	12.9385
2908.24	21.1981	34.7396	21.2883	17.1729	15.6493	15.5657	14.7568	13.9414	13.4506	13.0868
2910.09	21.3136	34.8269	21.4081	17.2983	15.7801	15.7099	14.8914	14.0655	13.5875	13.2547
2911.94	21.444	34.98	21.5417	17.4457	15.9229	15.8844	15.0572	14.2207	13.7778	13.4452
2913.78	21.6031	35.1447	21.6941	17.6394	16.1091	16.0754	15.2453	14.3925	14.0464	13.6756
2915.63	21.8343	35.3153	21.9098	17.8528	16.3169	16.286	15.4607	14.5767	14.321	13.9188
2917.47	22.0835	35.5553	22.142	18.0878	16.5428	16.5451	15.7245	14.7965	14.5545	14.1646
2919.31	22.3289	35.7873	22.375	18.3653	16.8131	16.8175	15.9998	15.0341	14.7804	14.4278
2921.16	22.6079	35.9887	22.6464	18.6471	17.0972	17.0879	16.2679	15.2904	15.0201	14.6965
2923	22.8815	36.2251	22.9146	18.9271	17.3858	17.3778	16.5494	15.5822	15.3041	14.9756
2924.84	23.1403	36.4419	23.1669	19.2229	17.6946	17.6655	16.8294	15.8783	15.6193	15.2653
2926.68	23.4101	36.6357	23.4328	19.5059	17.9917	17.9497	17.1089	16.1703	15.9078	15.5329
2928.52	23.6573	36.8516	23.6878	19.7799	18.2707	18.2379	17.3951	16.468	16.158	15.7854
2930.36	23.8798	37.0409	23.9476	20.0526	18.546	18.4953	17.6607	16.742	16.3908	16.0291
2932.2	24.0943	37.2243	24.2204	20.2913	18.7914	18.7231	17.9188	16.996	16.5913	16.2234
2934.04	24.2644	37.4342	24.4352	20.5282	19.024	18.934	18.1679	17.2373	16.7945	16.3924
2935.88	24.4088	37.5572	24.6092	20.7534	19.246	19.0945	18.3399	17.4246	16.9811	16.5417
2937.72	24.5424	38.3745	24.7746	20.8745	19.3913	19.2367	18.4554	17.5768	17.0676	16.6183
2939.55	24.5977	39.8801	24.8631	20.9262	19.4875	19.3653	18.5487	17.7074	17.0922	16.6519
2941.39	24.5757	40.6397	24.9002	20.9628	19.5685	19.4087	18.5798	17.7688	17.106	16.6737
2943.23	24.5309	40.6318	24.9262	20.9609	19.5904	19.3665	18.5625	17.7836	17.0992	16.6698
2945.06	24.4738	40.6018	24.9128	20.918	19.5443	19.289	18.5302	17.7864	17.0063	16.574
2946.9	24.3713	40.5543	24.8067	20.8539	19.4626	19.2061	18.4932	17.777	16.8471	16.4077
2948.73	24.2187	39.4898	24.6308	20.7771	19.3749	19.0531	18.3582	17.6529	16.6852	16.2358
2950.57	24.0544	37.8085	24.4517	20.5713	19.205	18.8283	18.1325	17.4303	16.4864	16.023
2952.4	23.8371	36.9762	24.2179	20.2702	18.9575	18.595	17.9075	17.2147	16.2522	15.7768
2954.23	23.5692	36.6916	23.9312	19.9819	18.7102	18.3311	17.6499	17.0035	16.0165	15.5411
2956.07	23.3078	36.3823	23.659	19.6811	18.45	18.0406	17.3595	16.7745	15.7548	15.3097
2957.9	23.0283	36.0867	23.3861	19.3719	18.1702	17.7645	17.0879	16.5347	15.4839	15.0747
2959.73	22.7359	35.7779	23.1075	19.092	17.8936	17.4892	16.8236	16.2646	15.2364	14.8349
2961.56	22.4726	35.4665	22.844	18.8255	17.5967	17.221	16.5652	15.9844	14.9977	14.5756
2963.39	22.2268	35.1951	22.5696	18.5761	17.3095	16.9833	16.3281	15.7297	14.7674	14.3238
2965.22	21.9899	34.927	22.3018	18.3573	17.0853	16.7622	16.1025	15.4904	14.5524	14.1108
2967.05	21.7667	34.6736	22.0764	18.1573	16.9133	16.5524	15.8882	15.2661	14.3455	13.9216
2968.88	21.5381	34.4685	21.8735	17.9676	16.7564	16.3556	15.6911	15.0662	14.1451	13.7402
2970.71	21.32	34.277	21.6785	17.7828	16.581	16.1605	15.5052	14.885	13.9487	13.5509
2972.53	21.137	34.0928	21.4836	17.5975	16.3745	15.9677	15.3242	14.7078	13.7488	13.343
2974.36	20.9762	33.9197	21.2685	17.4084	16.163	15.7781	15.1418	14.5179	13.5538	13.1405
2976.19	20.8173	33.724	21.052	17.2068	15.9706	15.5779	14.949	14.306	13.3692	12.9602
2978.01	20.6419	33.5165	20.8546	16.9815	15.7769	15.376	14.7526	14.094	13.1849	12.7821
2979.84	20.4348	33.3059	20.6578	16.76	15.5821	15.1786	14.5558	13.9021	13.007	12.6083
2981.66	20.2177	33.0526	20.4593	16.5613	15.3864	14.9677	14.344	13.7166	12.8373	12.4372
2983.49	20.0093	32.7894	20.2533	16.3667	15.1738	14.7622	14.1363	13.5355	12.664	12.2572
2985.31	19.7923	32.5408	20.0234	16.1765	14.9622	14.5823	13.9497	13.3601	12.4868	12.0735
2987.13	19.5718	32.2701	19.8047	15.9915	14.7671	14.4151	13.7674	13.1864	12.2968	11.8795
2988.95	19.3476	32.0197	19.6258	15.8072	14.5762	14.243	13.5832	13.0059	12.0877	11.6656
2990.78	19.103	31.8168	19.4597	15.6186	14.3846	14.0411	13.3857	12.8038	11.8782	11.4543
2992.6	18.8706	31.616	19.2859	15.4133	14.1824	13.8063	13.1695	12.5791	11.6707	11.2515
2994.42	18.6773	31.4211	19.0739	15.1878	13.9645	13.5789	12.9577	12.36	11.4563	11.046
2996.24	18.5023	31.2092	18.819	14.9643	13.7497	13.3741	12.7601	12.1574	11.2494	10.8465
2998.06	18.322	30.9572	18.5759	14.7406	13.543	13.1674	12.5609	11.9542	11.0467	10.6484
2999.88	18.1046	30.739	18.36	14.5067	13.3321	12.969	12.3624	11.7571	10.8441	10.4513
3001.7	17.8547	30.5707	18.1407	14.2899	13.1263	12.7723	12.1522	11.5579	10.6571	10.271
3003.51	17.6322	30.3905	17.9445	14.0894	12.9229	12.5699	11.9319	11.353	10.4798	10.1027
3005.33	17.4603	30.2149	17.7729	13.8945	12.7196	12.3802	11.7331	11.1645	10.3067	9.93843
3007.15	17.2994	29.9994	17.6053	13.7169	12.5318	12.1983	11.5527	10.9912	10.1452	9.78122
3008.96	17.144	29.7427	17.4451	13.5472	12.3531	12.0193	11.3796	10.8228	9.97925	9.61635
3010.78	16.9667	29.5509	17.2728	13.3823	12.1781	11.8585	11.2278	10.6642	9.81589	9.452
[truncated: 966 more rows]

## Sheet: Finger 785 nm
539.002	4.89823	4.48994	4.30467	4.24242	4.03662	4.24048	5.96887	5.2591	4.48362	4.27011
[truncated: 865 more rows]

[truncated: 2 more sheets: Hand 660 nm, Hand 785 nm]
