# Supplementary material for: Optics miniaturization strategy for demanding Raman spectroscopy applications
Source: Research Square preprint supplement (doi:10.21203/rs.3.rs-3186206/v1), 2023-08-16
Supplement: Supplementary file 4 [file triplicate serine.xlsx]

## Sheet: Concentration
	Sample ID	Conc, g/L	Peak Area
	SER_0,5g/L	0.5	0.3011
	SER_1,0g/L	1	0.675
	SER_2,0g/L	2	1.3066
	SER_4,0g/L	4	2.5497
	SER_6,0g/L	6	3.7885
	SER_8,0g/L	8	5.1607
	SER_10g/L	10	6.621
	Sample ID	DF	Peak area	Conc, g/L
	C1_7	5	2.561	19.5975
	C1_8	5	3.6221	27.7173
	C1_9	5	3.3731	25.8119
	C1_10	5	3.5948	27.5084
	C2_7	5	3.5355	27.0546
	C2_8	5	5.1658	39.5301
	C2_9	5	5.3874	41.2259			C3
	C2_10	5	5.6005	42.8566
							Arbitary time				Average	deviation
	C3_1-1	5	0.4886	3.7389			3	3.7389	3.16651	3.86746	3.59096	0.373159
	C3_1-2	5	0.8282	6.33762			9	6.33762	5.47368	5.35124	5.72084	0.537638
	C3_1-3	5	1.6802	12.8574			20	12.8574	13.8369	12.9125	13.2022	0.550295
	C3_1-4	5	2.3161	17.7234			24	17.7234	16.317	17.2521	17.0975	0.715872
	C3_1-5	5	2.6674	20.4117			28	20.4117	20.476	21.105	20.6642	0.38307
	C3_1-6	5	3.3267	25.4568			32	25.4568	24.9242	25.2564	25.2125	0.268996
	C3_1-7	5	3.4399	26.3231			36	26.3231	27.64	28.1007	27.3546	0.922545
	C3_1-8	5	5.5018	42.1013			38	42.1013	41.2205	42.2505	41.8575	0.556616
	C3_1-9	5	6.3548	48.6287			44	48.6287	48.2583	47.3592	48.0821	0.652852
	C3_1-10	5	6.0086	45.9795			48	45.9795	46.1126	45.7912	45.9611	0.161483
	C3_2_1	5	0.4138	3.16651
	C3_2_2	5	0.7153	5.47368
	C3_2_3	5	1.8082	13.8369
	C3_2_4	5	2.1323	16.317
	C3_2_5	5	2.6758	20.476
	C3_2_6	5	3.2571	24.9242
	C3_2_7	5	3.612	27.64
	C3_2_8	5	5.3867	41.2205
	C3_2_9	5	6.3064	48.2583
	C3_2_10	5	6.026	46.1126
	C3_3_1	5	0.5054	3.86746
	C3_3_2	5	0.6993	5.35124
	C3_3_3	5	1.6874	12.9125
	C3_3_4	5	2.2545	17.2521
	C3_3_5	5	2.758	21.105				D3
	C3_3_6	5	3.3005	25.2564						3.38537	3.61953	3.48026
	C3_3_7	5	3.6722	28.1007						7.47628	6.38736	7.1809
	C3_3_8	5	5.5213	42.2505						13.2851	14.1315	13.6065
	C3_3_9	5	6.1889	47.3592						15.665	16.33	16.4164
	C3_3_10	5	5.984	45.7912						19.8515	20.2051	20.5862
	D3_1_1	5	0.4424	3.38537						21.0874	21.646	21.6475
	D3_1_2	5	0.977	7.47628						24.1001	25.4392	23.6723
	D3_1_3	5	1.7361	13.2851						32.5115	33.4527	33.693
	D3_1_4	5	2.0471	15.665						41.4899	41.4409	40.5946
	D3_1_5	5	2.5942	19.8515						45.489	44.1514	45.7369
	D3_1_6	5	2.7557	21.0874
	D3_1_7	5	3.1494	24.1001
	D3_1_8	5	4.2486	32.5115
	D3_1_9	5	5.4219	41.4899
	D3_1_10	5	5.9445	45.489
	D3_2_1	5	0.473	3.61953
	D3_2_2	5	0.8347	6.38736
	D3_2_3	5	1.8467	14.1315
	D3_2_4	5	2.134	16.33
	D3_2_5	5	2.6404	20.2051
	D3_2_6	5	2.8287	21.646
	D3_2_7	5	3.3244	25.4392
	D3_2_8	5	4.3716	33.4527
	D3_2_9	5	5.4155	41.4409
	D3_2_10	5	5.7697	44.1514
	D3_3_1	5	0.4548	3.48026
	D3_3_2	5	0.9384	7.1809
	D3_3_3	5	1.7781	13.6065
	D3_3_4	5	2.1453	16.4164
	D3_3_5	5	2.6902	20.5862
	D3_3_6	5	2.8289	21.6475
	D3_3_7	5	3.0935	23.6723
	D3_3_8	5	4.403	33.693
	D3_3_9	5	5.3049	40.5946
	D3_3_10	5	5.9769	45.7369
	Sample ID	Conc, g/L	Peak area
	SER_0,5g/L	0.5	0.2588
	SER_1,0g/L	1	0.6357
	SER_2,0g/L	2	1.2286
	SER_4,0g/L	4	2.6275
	SER_6,0g/L	6	3.9208
	SER_8,0g/L	8	5.2451
	SER_10g/L	10	6.5999

## Sheet: Mean, Stdv., RSD
			Concentration, g/L
		C3 Samples	1st injection	2nd injection	3rd injection	Average	stdv.	RSD, %
		1	3.7389	3.16651	3.86746	3.59096	0.373159	10.3916
		2	6.33762	5.47368	5.35124	5.72084	0.537638	9.39789
		3	12.8574	13.8369	12.9125	13.2022	0.550295	4.1682
		4	17.7234	16.317	17.2521	17.0975	0.715872	4.187
		5	20.4117	20.476	21.105	20.6642	0.38307	1.85378
		6	25.4568	24.9242	25.2564	25.2125	0.268996	1.06692
		7	26.3231	27.64	28.1007	27.3546	0.922545	3.37254
		8	42.1013	41.2205	42.2505	41.8575	0.556616	1.32979
		9	48.6287	48.2583	47.3592	48.0821	0.652852	1.35779
		10	45.9795	46.1126	45.7912	45.9611	0.161483	0.351347
		D3 Samples
		1	3.38537	3.61953	3.48026	3.49505	0.117779	3.36987
		2	7.47628	6.38736	7.1809	7.01485	0.563131	8.02771
		3	13.2851	14.1315	13.6065	13.6744	0.427231	3.12432
		4	15.665	16.33	16.4164	16.1371	0.41117	2.54797
		5	19.8515	20.2051	20.5862	20.2143	0.367396	1.81751
		6	21.0874	21.646	21.6475	21.4603	0.32296	1.50492
		7	24.1001	25.4392	23.6723	24.4039	0.921799	3.77726
		8	32.5115	33.4527	33.693	33.2191	0.624449	1.87979
		9	41.4899	41.4409	40.5946	41.1751	0.50337	1.22251
		10	45.489	44.1514	45.7369	45.1258	0.852904	1.89006
