# Supplementary material for: Optics miniaturization strategy for demanding Raman spectroscopy applications
Source: Research Square preprint supplement (doi:10.21203/rs.3.rs-3186206/v1), 2023-08-16
Supplement: Supplementary file 10 [file Data S6 SERS spectra, calibration and validation data for MTX quantification.xlsx]

## Sheet: Raw Data
	0	0	0	5	5	5	5	10	10	10	10	25	25	25	25	50	50	50	50	75	75	75	75	100	100	100	100
500	0.0124400453642011	0.0956858173012734	0.0173468906432390	0.0467625297605991	0.0703619197010994	0.0360728241503239	0.0611414127051830	0.100554198026657	0.169947937130928	0.0488889291882515	0.0685927346348763	0.109561510384083	0.127874866127968	0.216520056128502	0.115559816360474	0.219375535845757	0.240918755531311	0.174999192357063	0.178764373064041	0.234762400388718	0.158248454332352	0.192792907357216	0.193227753043175	0.212030962109566	0.172331839799881	0.150043129920959	0.138570472598076
502	0.0123670483008027	0.0957165136933327	0.0173069089651108	0.0467483550310135	0.0703326538205147	0.0359847545623779	0.0610139966011047	0.100635237991810	0.170101031661034	0.0488661564886570	0.0684513673186302	0.109546005725861	0.127931833267212	0.216332659125328	0.115703649818897	0.219237238168716	0.240435466170311	0.174865037202835	0.178590446710587	0.234434336423874	0.158293992280960	0.192504420876503	0.192994415760040	0.212176367640495	0.172493577003479	0.150247097015381	0.138499587774277
504	0.0122933499515057	0.0957420170307159	0.0172628853470087	0.0467495657503605	0.0703001767396927	0.0359059683978558	0.0609047934412956	0.100736409425735	0.170288756489754	0.0488456599414349	0.0683484598994255	0.109566576778889	0.128011837601662	0.216204538941383	0.115816041827202	0.218936607241631	0.239611089229584	0.174600973725319	0.178298279643059	0.233919739723206	0.158319890499115	0.192021578550339	0.192562073469162	0.212313055992126	0.172614932060242	0.150416746735573	0.138446152210236
506	0.0122651802375913	0.0957772359251976	0.0172548238188028	0.0468074455857277	0.0703228861093521	0.0358999371528626	0.0608901046216488	0.100771196186543	0.170465514063835	0.0488229207694531	0.0683152824640274	0.109629191458225	0.128180995583534	0.216128230094910	0.115959607064724	0.218765854835510	0.239032626152039	0.174503386020660	0.178195729851723	0.233720928430557	0.158303692936897	0.191795662045479	0.192348182201386	0.212474629282951	0.172899469733238	0.150580674409866	0.138461172580719
508	0.0122379269450903	0.0958732292056084	0.0172784850001335	0.0469391904771328	0.0704257488250732	0.0359178818762302	0.0609351322054863	0.100766845047474	0.170756489038467	0.0487739741802216	0.0682905465364456	0.109776601195335	0.128446623682976	0.215973898768425	0.116161905229092	0.218748956918716	0.238598287105560	0.174604848027229	0.178389087319374	0.233879446983337	0.158251315355301	0.191802188754082	0.192363917827606	0.212782636284828	0.173188939690590	0.150772482156754	0.138549029827118
510	0.0122241247445345	0.0959514081478119	0.0173046700656414	0.0470150634646416	0.0705145820975304	0.0359240211546421	0.0609616823494434	0.100763410329819	0.170944139361382	0.0487252548336983	0.0682820305228233	0.109857596457005	0.128547132015228	0.215807288885117	0.116246089339256	0.218761667609215	0.238162428140640	0.174735978245735	0.178678557276726	0.234004050493240	0.158218160271645	0.191809549927712	0.192408159375191	0.213249772787094	0.173217803239822	0.150842696428299	0.138621732592583
512	0.0122326817363501	0.0959523990750313	0.0173187553882599	0.0470257140696049	0.0705229490995407	0.0359070077538490	0.0608548931777477	0.100755259394646	0.170921593904495	0.0486404225230217	0.0682635307312012	0.109787024557590	0.128467395901680	0.215445622801781	0.116190396249294	0.218741178512573	0.237865149974823	0.174738571047783	0.178775876760483	0.233877152204514	0.158264994621277	0.191711306571960	0.192399889230728	0.213771969079971	0.173156738281250	0.150838389992714	0.138530448079109
514	0.0122467828914523	0.0959109067916870	0.0173277799040079	0.0470602028071880	0.0705148503184319	0.0358848124742508	0.0606591515243053	0.100722759962082	0.170876979827881	0.0485384650528431	0.0682314261794090	0.109677068889141	0.128405794501305	0.215021327137947	0.116083092987537	0.218562528491020	0.237342774868011	0.174663737416267	0.178662165999413	0.233680084347725	0.158427864313126	0.191453337669373	0.192336618900299	0.213947862386704	0.173199132084847	0.150844842195511	0.138397350907326
516	0.0122664337977767	0.0958906933665276	0.0173367019742727	0.0471186675131321	0.0705475136637688	0.0358898565173149	0.0605566091835499	0.100718684494495	0.170910894870758	0.0485305488109589	0.0682031959295273	0.109641402959824	0.128500670194626	0.214875578880310	0.116111956536770	0.218402206897736	0.236873775720596	0.174626097083092	0.178597062826157	0.233648896217346	0.158579707145691	0.191310554742813	0.192339569330215	0.213792771100998	0.173470646142960	0.150958523154259	0.138424485921860
518	0.0123382471501827	0.0959320440888405	0.0174001380801201	0.0472727641463280	0.0706617757678032	0.0359358415007591	0.0605367757380009	0.100829064846039	0.171049490571022	0.0486397668719292	0.0681607574224472	0.109695211052895	0.128823891282082	0.214819744229317	0.116393700242043	0.218522310256958	0.236748725175858	0.174797743558884	0.178918689489365	0.233860448002815	0.158795475959778	0.191539347171783	0.192676812410355	0.213636457920074	0.173855826258659	0.151306167244911	0.138616949319839
520	0.0124194463714957	0.0959939956665039	0.0174809210002422	0.0474412590265274	0.0707725808024406	0.0359842516481876	0.0605375692248344	0.100964538753033	0.171165362000465	0.0487449392676353	0.0681300684809685	0.109778754413128	0.129112079739571	0.214771866798401	0.116727791726589	0.218846231698990	0.236756548285484	0.175141856074333	0.179604008793831	0.234233349561691	0.159158825874329	0.191976100206375	0.193346962332726	0.213614225387573	0.174130022525787	0.151657670736313	0.138800323009491
522	0.0124878622591496	0.0960537791252136	0.0175399500876665	0.0475619845092297	0.0708400979638100	0.0360345691442490	0.0604996755719185	0.100982755422592	0.171161070466042	0.0487870648503304	0.0681235119700432	0.109904274344444	0.129326730966568	0.214741483330727	0.117121860384941	0.219158172607422	0.236869171261787	0.175416931509972	0.180174991488457	0.234643891453743	0.159481808543205	0.192297622561455	0.193906277418137	0.213889449834824	0.174519762396812	0.152081936597824	0.139007583260536
524	0.0126025462523103	0.0961421653628349	0.0176424514502287	0.0477401167154312	0.0709145590662956	0.0361197143793106	0.0603946521878243	0.100897789001465	0.171102732419968	0.0488445051014423	0.0681087374687195	0.110129475593567	0.129622310400009	0.214743405580521	0.117723464965820	0.219730660319328	0.237201586365700	0.175929278135300	0.180937334895134	0.235551238059998	0.160191476345062	0.192874312400818	0.194778159260750	0.214443430304527	0.175019010901451	0.152686044573784	0.139310881495476
526	0.0126473056152463	0.0961690545082092	0.0176968518644571	0.0478284358978272	0.0709331780672073	0.0361378192901611	0.0602831579744816	0.100809931755066	0.171062007546425	0.0488540232181549	0.0680663287639618	0.110279738903046	0.129787728190422	0.214800521731377	0.118160538375378	0.220459133386612	0.237614035606384	0.176540315151215	0.181811347603798	0.236598998308182	0.161093950271606	0.193560421466827	0.195801615715027	0.215030118823051	0.175606489181519	0.153119087219238	0.139513164758682
528	0.0124476114287972	0.0960334539413452	0.0175351519137621	0.0477377362549305	0.0708092972636223	0.0359059572219849	0.0600627996027470	0.100718133151531	0.171045869588852	0.0486561805009842	0.0678565949201584	0.110373705625534	0.129916384816170	0.214936584234238	0.118553504347801	0.220884516835213	0.237890198826790	0.176953032612801	0.182475119829178	0.237454414367676	0.161780595779419	0.194115564227104	0.196531772613525	0.215519502758980	0.176525026559830	0.153730735182762	0.139866322278976
530	0.0121078491210938	0.0958328619599342	0.0172138158231974	0.0475773885846138	0.0706171467900276	0.0355406552553177	0.0597277879714966	0.100549213588238	0.171036913990974	0.0483578816056252	0.0675636976957321	0.110469020903111	0.130077928304672	0.215095996856689	0.118908606469631	0.221507370471954	0.238288015127182	0.177529528737068	0.183524429798126	0.238755896687508	0.162724271416664	0.195059984922409	0.197552472352982	0.215916708111763	0.177359551191330	0.154374584555626	0.140285521745682
532	0.0118869245052338	0.0957410559058189	0.0170011464506388	0.0474888868629932	0.0704752206802368	0.0353288352489471	0.0595358535647392	0.100446030497551	0.171071603894234	0.0481954067945480	0.0673989430069923	0.110517986118793	0.130210772156715	0.215269923210144	0.119063906371593	0.222053140401840	0.238579571247101	0.177928552031517	0.184321567416191	0.239699840545654	0.163419619202614	0.195744618773460	0.198329702019691	0.216298922896385	0.178186357021332	0.154867306351662	0.140500828623772
534	0.0116424467414618	0.0956720635294914	0.0168001912534237	0.0474370978772640	0.0702017173171043	0.0351178161799908	0.0593991614878178	0.100387975573540	0.171171009540558	0.0480553694069386	0.0672179907560349	0.110595159232616	0.130400821566582	0.215634122490883	0.119208231568336	0.222158893942833	0.238433465361595	0.178021654486656	0.184525772929192	0.239958256483078	0.163627907633781	0.195950910449028	0.198596745729446	0.216545775532722	0.179078608751297	0.155667334794998	0.140693873167038
536	0.0114289410412312	0.0956085845828056	0.0166158024221659	0.0474134907126427	0.0699612572789192	0.0349456332623959	0.0592805221676827	0.100338868796825	0.171269208192825	0.0479503162205219	0.0670735388994217	0.110667742788792	0.130511611700058	0.215895920991898	0.119321204721928	0.222086429595947	0.237945094704628	0.178031384944916	0.184535935521126	0.240015149116516	0.163737133145332	0.196061015129089	0.198747575283051	0.216338232159615	0.179468184709549	0.156208455562592	0.140791058540344
538	0.0113725019618869	0.0956404507160187	0.0165688004344702	0.0474152192473412	0.0699972286820412	0.0348999351263046	0.0592067502439022	0.100379057228565	0.171365022659302	0.0479031018912792	0.0670130699872971	0.110681712627411	0.130462124943733	0.215769395232201	0.119327358901501	0.222004950046539	0.237535923719406	0.177972331643105	0.184348568320274	0.239888429641724	0.163704738020897	0.195956736803055	0.198658227920532	0.215591326355934	0.179455831646919	0.156203269958496	0.140778347849846
540	0.0113708637654781	0.0957717970013619	0.0165848098695278	0.0474220700562000	0.0702096670866013	0.0348788239061832	0.0591054633259773	0.100535258650780	0.171518385410309	0.0478413403034210	0.0669459328055382	0.110643066465855	0.130354270339012	0.215399891138077	0.119220070540905	0.221890762448311	0.237086638808250	0.177754014730454	0.183737024664879	0.239360287785530	0.163326397538185	0.195390045642853	0.197956457734108	0.214608699083328	0.179242357611656	0.156020358204842	0.140684470534325
542	0.0113800307735801	0.0958645343780518	0.0166057441383600	0.0473958551883698	0.0703340992331505	0.0348487161099911	0.0590175315737724	0.100640885531902	0.171573773026466	0.0477883182466030	0.0668606236577034	0.110496833920479	0.130201354622841	0.214936107397079	0.118990056216717	0.221674859523773	0.236527368426323	0.177443936467171	0.183026775717735	0.238635808229446	0.162804409861565	0.194623246788979	0.197006225585938	0.213706746697426	0.178546309471130	0.155669882893562	0.140395328402519
544	0.0113885225728154	0.0958740115165710	0.0166190844029188	0.0472445562481880	0.0702533870935440	0.0347779691219330	0.0588432624936104	0.100510396063328	0.171362280845642	0.0476775281131268	0.0666132494807243	0.109849445521832	0.129659503698349	0.213712707161903	0.118300922214985	0.221246078610420	0.235863178968430	0.177006185054779	0.182416826486588	0.237732052803040	0.162216857075691	0.193667054176331	0.196091189980507	0.212757393717766	0.177065968513489	0.154525265097618	0.139346763491631
546	0.0113949328660965	0.0958606824278832	0.0166391916573048	0.0470160879194737	0.0701314881443977	0.0346988998353481	0.0585678629577160	0.100235603749752	0.171062484383583	0.0475234575569630	0.0663065537810326	0.108981609344482	0.129018336534500	0.212278261780739	0.117428138852119	0.220189586281776	0.234577044844627	0.176138117909431	0.181171014904976	0.236026719212532	0.161146640777588	0.191906854510307	0.194611072540283	0.211912825703621	0.175725564360619	0.153230533003807	0.138094872236252
548	0.0113754849880934	0.0958732366561890	0.0166437607258558	0.0468535460531712	0.0701000988483429	0.0346537232398987	0.0584002807736397	0.100101694464684	0.171015053987503	0.0473869107663631	0.0661351308226585	0.108533106744289	0.128608107566834	0.211446881294251	0.116767346858978	0.219334840774536	0.233509749174118	0.175538599491119	0.180054694414139	0.234604477882385	0.160311058163643	0.190437525510788	0.193326324224472	0.211186930537224	0.174667686223984	0.152474775910378	0.137322545051575
550	0.0113056749105453	0.0959691479802132	0.0166068747639656	0.0466464757919312	0.0701333582401276	0.0345574356615543	0.0582041144371033	0.100128129124641	0.171261578798294	0.0471657887101173	0.0659076124429703	0.108136825263500	0.128001064062119	0.210486084222794	0.115907184779644	0.219174474477768	0.232862263917923	0.175333082675934	0.179151117801666	0.233417183160782	0.159605860710144	0.189349263906479	0.192223682999611	0.210683450102806	0.173524647951126	0.151602327823639	0.136374071240425
552	0.0112387677654624	0.0960710570216179	0.0165571924299002	0.0464566759765148	0.0701825916767120	0.0344586707651615	0.0580053254961968	0.100184693932533	0.171523705124855	0.0469856336712837	0.0657123625278473	0.107773244380951	0.127510875463486	0.209719866514206	0.115224197506905	0.219163939356804	0.232125580310822	0.175107374787331	0.178015902638435	0.232051447033882	0.158659607172012	0.188133880496025	0.190985471010208	0.210699632763863	0.172628656029701	0.150971919298172	0.135628148913383
554	0.0112050762400031	0.0961104035377502	0.0165252406150103	0.0463151186704636	0.0702285170555115	0.0343817919492722	0.0578707642853260	0.100184239447117	0.171621084213257	0.0468479953706265	0.0655393302440643	0.107383958995342	0.127170071005821	0.209089487791061	0.114687688648701	0.219083786010742	0.231696695089340	0.175020918250084	0.177368402481079	0.231300085783005	0.158159285783768	0.187353447079659	0.190247356891632	0.211084231734276	0.171706885099411	0.150406748056412	0.135117590427399
556	0.0111667988821864	0.0961382687091827	0.0164854470640421	0.0461119227111340	0.0702671557664871	0.0342728346586227	0.0576857477426529	0.100094400346279	0.171725183725357	0.0466414205729961	0.0652782246470451	0.106813438236713	0.126756221055985	0.208304092288017	0.114092953503132	0.218758419156075	0.231296271085739	0.175118610262871	0.176814228296280	0.230728194117546	0.157958015799522	0.186491280794144	0.189594924449921	0.211537316441536	0.171003803610802	0.149747490882874	0.134615659713745
558	0.0111548323184252	0.0961851179599762	0.0164702907204628	0.0460077561438084	0.0703238919377327	0.0342336669564247	0.0575892478227615	0.100052826106548	0.171849042177200	0.0465291850268841	0.0651516243815422	0.106509625911713	0.126514837145805	0.207834154367447	0.113872632384300	0.218483909964561	0.230893820524216	0.175270557403564	0.176295518875122	0.230306863784790	0.157879874110222	0.185766950249672	0.189121976494789	0.211999297142029	0.170830965042114	0.149569198489189	0.134426176548004
560	0.0112128043547273	0.0964417755603790	0.0165204871445894	0.0460873879492283	0.0705836489796639	0.0343189612030983	0.0576445311307907	0.100255429744720	0.172217249870300	0.0465365424752235	0.0652310848236084	0.106471374630928	0.126379832625389	0.207493498921394	0.113935723900795	0.218665719032288	0.230666726827621	0.175501599907875	0.176194384694099	0.230245038866997	0.158070400357246	0.185570418834686	0.189165279269218	0.212645694613457	0.170888602733612	0.149869635701180	0.134430974721909
562	0.0112937018275261	0.0968253687024117	0.0166021324694157	0.0462278053164482	0.0709048584103584	0.0344390422105789	0.0577498003840447	0.100654616951942	0.172775685787201	0.0465589798986912	0.0653429478406906	0.106496788561344	0.126319140195847	0.207246318459511	0.114041417837143	0.219344243407249	0.230466723442078	0.175972938537598	0.176424533128738	0.230332016944885	0.158604949712753	0.185552731156349	0.189470574259758	0.213306024670601	0.171028494834900	0.150246635079384	0.134486705064774
564	0.0113162472844124	0.0970743000507355	0.0166357606649399	0.0462982319295406	0.0710327699780464	0.0344717614352703	0.0577898435294628	0.100923471152782	0.173122689127922	0.0465424545109272	0.0653562247753143	0.106572695076466	0.126383066177368	0.207176998257637	0.114113241434097	0.219899117946625	0.230371981859207	0.176335543394089	0.176696479320526	0.230518147349358	0.159031376242638	0.185628563165665	0.189694240689278	0.213983237743378	0.171400070190430	0.150575324892998	0.134617239236832
566	0.0113032925873995	0.0973772332072258	0.0166314840316772	0.0463396869599819	0.0711345225572586	0.0344294197857380	0.0577665977180004	0.101138018071651	0.173498690128326	0.0465071275830269	0.0653403326869011	0.106770336627960	0.126550689339638	0.207160249352455	0.114259757101536	0.220295742154121	0.230564340949059	0.176689058542252	0.176976725459099	0.231020525097847	0.159455329179764	0.185985982418060	0.190055295825005	0.214722394943237	0.171949654817581	0.151107817888260	0.134892955422401
568	0.0112890787422657	0.0976251661777496	0.0166288726031780	0.0463842600584030	0.0712401121854782	0.0343853533267975	0.0577392913401127	0.101327128708363	0.173843786120415	0.0464827418327332	0.0653481632471085	0.106950163841248	0.126680642366409	0.207192674279213	0.114427313208580	0.220877379179001	0.230919048190117	0.177163377404213	0.177304863929749	0.231654435396194	0.160003781318665	0.186503499746323	0.190614849328995	0.215372264385223	0.172316312789917	0.151478216052055	0.135059550404549
570	0.0112791089341044	0.0977664813399315	0.0166552830487490	0.0464764460921288	0.0713665783405304	0.0343889817595482	0.0577473901212215	0.101460807025433	0.174191057682037	0.0464816540479660	0.0653637796640396	0.107082910835743	0.126829847693443	0.207362025976181	0.114624410867691	0.221372827887535	0.231170713901520	0.177587449550629	0.177559435367584	0.231965661048889	0.160424992442131	0.186824217438698	0.191032350063324	0.216058924794197	0.172591313719749	0.151707902550697	0.135050222277641
572	0.0112634841352701	0.0979692116379738	0.0167153049260378	0.0466077364981175	0.0715280771255493	0.0344120375812054	0.0577787235379219	0.101690866053104	0.174789875745773	0.0465049445629120	0.0653620064258575	0.107227154076099	0.127051651477814	0.207578822970390	0.114842981100082	0.222312897443771	0.231675118207932	0.178390011191368	0.178117081522942	0.232387274503708	0.161105930805206	0.187304675579071	0.191687569022179	0.216971784830093	0.172816172242165	0.151941910386086	0.134996369481087
574	0.0112549997866154	0.0981423929333687	0.0167608615010977	0.0466825626790524	0.0716144889593124	0.0344344452023506	0.0578000098466873	0.101865381002426	0.175212547183037	0.0465437881648541	0.0653627738356590	0.107265532016754	0.127197533845902	0.207639217376709	0.114969715476036	0.223211690783501	0.232149749994278	0.179100841283798	0.178611442446709	0.232827812433243	0.161680981516838	0.187728241086006	0.192227467894554	0.218108713626862	0.173104375600815	0.152111992239952	0.135001897811890
576	0.0112594328820705	0.0984216406941414	0.0167991351336241	0.0467241816222668	0.0717322751879692	0.0344796516001225	0.0578045770525932	0.101944349706173	0.175632402300835	0.0466136597096920	0.0653840303421021	0.107263490557671	0.127368986606598	0.207606032490730	0.115121327340603	0.223445504903793	0.232180550694466	0.179243773221970	0.178671285510063	0.233026459813118	0.161825478076935	0.187896743416786	0.192260012030602	0.219175502657890	0.173589169979095	0.152402698993683	0.135086417198181
578	0.0112735144793987	0.0987525060772896	0.0168454702943563	0.0467802137136459	0.0718861222267151	0.0345328748226166	0.0578084066510201	0.102029450237751	0.176157027482986	0.0466850213706493	0.0654166415333748	0.107303783297539	0.127551555633545	0.207619681954384	0.115282155573368	0.223479464650154	0.232051938772202	0.179211676120758	0.178572788834572	0.233199626207352	0.161898776888847	0.188095465302467	0.192108705639839	0.219586476683617	0.174045294523239	0.152704641222954	0.135201722383499
580	0.0113032450899482	0.0990115925669670	0.0168873108923435	0.0468842126429081	0.0720728561282158	0.0345936231315136	0.0578538030385971	0.102122120559216	0.176556661725044	0.0467831976711750	0.0655063912272453	0.107447907328606	0.127783477306366	0.207976028323174	0.115456141531467	0.223613113164902	0.232115507125855	0.179305195808411	0.178630381822586	0.233475893735886	0.162050366401672	0.188339233398438	0.192122340202332	0.219533666968346	0.174612402915955	0.153025016188622	0.135429769754410
582	0.0113690551370382	0.0994688645005226	0.0169783104211092	0.0471054837107658	0.0724475011229515	0.0347371883690357	0.0580054186284542	0.102358520030975	0.177187085151672	0.0469828248023987	0.0657171085476875	0.107814267277718	0.128207653760910	0.208708226680756	0.115704566240311	0.224298506975174	0.232684433460236	0.180010333657265	0.179327994585037	0.234465554356575	0.162629023194313	0.188880905508995	0.192636027932167	0.219533860683441	0.175156593322754	0.153522595763206	0.135832980275154
584	0.0114139840006828	0.0998317897319794	0.0170585382729769	0.0472713485360146	0.0727169066667557	0.0348344296216965	0.0581344775855541	0.102585971355438	0.177683711051941	0.0471040084958077	0.0658574104309082	0.108104608952999	0.128496021032333	0.209149733185768	0.115888118743896	0.225243538618088	0.233444720506668	0.180868297815323	0.180243194103241	0.235537379980087	0.163423821330071	0.189496934413910	0.193299099802971	0.219775900244713	0.175324082374573	0.153803005814552	0.136040747165680
586	0.0113937705755234	0.0999604836106300	0.0170770976692438	0.0473052896559238	0.0727277994155884	0.0348017401993275	0.0581338219344616	0.102597527205944	0.177848652005196	0.0470478981733322	0.0658282116055489	0.108161471784115	0.128708675503731	0.209231182932854	0.116097174584866	0.225709021091461	0.233870700001717	0.181245952844620	0.180694654583931	0.235941722989082	0.163929864764214	0.189822629094124	0.193625390529633	0.220212250947952	0.175355330109596	0.153909295797348	0.135971993207932
588	0.0113392742350698	0.100083470344543	0.0170762855559587	0.0473164394497871	0.0726775750517845	0.0347253456711769	0.0580879785120487	0.102534949779511	0.178022056818008	0.0469320975244045	0.0657455325126648	0.108131550252438	0.128949567675591	0.209277153015137	0.116371020674706	0.226143985986710	0.234302967786789	0.181597039103508	0.181159436702728	0.236568808555603	0.164527475833893	0.190120831131935	0.193919360637665	0.220615446567535	0.175497174263001	0.154046148061752	0.135853320360184
590	0.0113154659047723	0.100241519510746	0.0170787908136845	0.0473386347293854	0.0727045461535454	0.0346966087818146	0.0580889247357845	0.102532103657722	0.178264871239662	0.0469196848571301	0.0657422542572022	0.108172059059143	0.129183903336525	0.209488019347191	0.116656325757504	0.226469203829765	0.234555691480637	0.181831076741219	0.181504920125008	0.237144708633423	0.164916098117828	0.190244764089584	0.194061949849129	0.220983430743217	0.175926476716995	0.154245093464851	0.135921567678452
592	0.0113232247531414	0.100700974464417	0.0171196907758713	0.0474370606243610	0.0729527920484543	0.0347345992922783	0.0581576228141785	0.102738760411739	0.178962916135788	0.0470459982752800	0.0658781453967094	0.108443848788738	0.129700660705566	0.210206151008606	0.117168359458447	0.226408794522285	0.234269067645073	0.181737616658211	0.181512609124184	0.236855596303940	0.164846092462540	0.189996317028999	0.193784967064857	0.221385315060616	0.176521718502045	0.154695615172386	0.136323690414429
594	0.0113401664420962	0.101199664175510	0.0171714778989553	0.0475526042282581	0.0732073262333870	0.0347834713757038	0.0582294613122940	0.103048190474510	0.179759562015533	0.0471673458814621	0.0660299137234688	0.108743786811829	0.130131453275681	0.210845887660980	0.117539845407009	0.226068124175072	0.233731865882874	0.181487083435059	0.181365042924881	0.236081153154373	0.164603486657143	0.189615368843079	0.193227827548981	0.221601217985153	0.176834598183632	0.155073300004005	0.136683091521263
596	0.0113703766837716	0.101464293897152	0.0172145534306765	0.0476633720099926	0.0733240023255348	0.0348358377814293	0.0582700297236443	0.103206925094128	0.180204540491104	0.0472451373934746	0.0661410912871361	0.108898684382439	0.130387023091316	0.211135968565941	0.117679379880428	0.225899785757065	0.233609437942505	0.181419283151627	0.181330084800720	0.235878989100456	0.164512485265732	0.189535483717918	0.193008795380592	0.221668139100075	0.176994040608406	0.155348598957062	0.136847034096718
598	0.0114257279783487	0.101771958172321	0.0172954872250557	0.0478570945560932	0.0735100358724594	0.0349374264478684	0.0583610013127327	0.103370256721973	0.180742144584656	0.0473775938153267	0.0662733763456345	0.109093114733696	0.130760312080383	0.211522683501244	0.117818839848042	0.226245984435081	0.234099417924881	0.181698411703110	0.181648790836334	0.236520528793335	0.164719000458717	0.189756274223328	0.193249210715294	0.221931889653206	0.177128776907921	0.155666172504425	0.137016847729683
600	0.0114574050530791	0.101963259279728	0.0173572786152363	0.0479604937136173	0.0736505091190338	0.0349844098091126	0.0584298446774483	0.103500045835972	0.181098684668541	0.0474503375589848	0.0663099735975266	0.109206467866898	0.130920290946960	0.211715370416641	0.117869816720486	0.226747870445251	0.234601914882660	0.182035595178604	0.182055786252022	0.237256214022636	0.164972588419914	0.190019130706787	0.193583607673645	0.222514718770981	0.177097469568253	0.155735850334167	0.136998683214188
602	0.0114476364105940	0.101989991962910	0.0173580329865217	0.0478767827153206	0.0736711546778679	0.0348988249897957	0.0583367273211479	0.103460051119328	0.181133270263672	0.0473912023007870	0.0661717951297760	0.109112456440926	0.130708664655685	0.211487084627152	0.117670401930809	0.227001726627350	0.234656348824501	0.182199805974960	0.182153046131134	0.237558320164680	0.165081590414047	0.190266236662865	0.193669974803925	0.223136976361275	0.176937803626060	0.155519559979439	0.136595860123634
604	0.0114296646788716	0.101984821259975	0.0173363909125328	0.0477404221892357	0.0736541524529457	0.0347655117511749	0.0581434816122055	0.103310428559780	0.181105092167854	0.0472887717187405	0.0660015568137169	0.108945667743683	0.130439639091492	0.211231544613838	0.117419421672821	0.227294608950615	0.234554871916771	0.182393282651901	0.182059466838837	0.237646490335464	0.165268525481224	0.190718770027161	0.193688124418259	0.223351076245308	0.176937699317932	0.155321493744850	0.136193245649338
606	0.0114296702668071	0.102086059749126	0.0173349380493164	0.0477481521666050	0.0736948028206825	0.0347500406205654	0.0580643825232983	0.103272072970867	0.181244045495987	0.0472756661474705	0.0660091638565064	0.108979240059853	0.130522087216377	0.211419776082039	0.117468900978565	0.227611601352692	0.234583601355553	0.182556822896004	0.181971386075020	0.237766772508621	0.165506079792976	0.191172167658806	0.193795964121819	0.223260566592217	0.177400976419449	0.155472353100777	0.136338606476784
608	0.0114536574110389	0.102485708892345	0.0173840094357729	0.0479849837720394	0.0738978534936905	0.0348991975188255	0.0581250786781311	0.103525154292583	0.181806042790413	0.0474067442119122	0.0661524087190628	0.109301529824734	0.130968958139420	0.211965680122376	0.117808625102043	0.228202894330025	0.235117375850678	0.182896047830582	0.182199463248253	0.238530397415161	0.165956988930702	0.191911965608597	0.194281503558159	0.223214790225029	0.178034484386444	0.155938237905502	0.136976510286331
610	0.0114797316491604	0.102866433560848	0.0174381416290998	0.0481957718729973	0.0740833654999733	0.0350439772009850	0.0581826046109200	0.103863172233105	0.182352110743523	0.0475308261811733	0.0662532225251198	0.109561689198017	0.131326124072075	0.212347418069839	0.118032395839691	0.228993445634842	0.235837385058403	0.183287665247917	0.182608783245087	0.239445000886917	0.166437685489655	0.192735433578491	0.194878220558167	0.223215341567993	0.178351029753685	0.156286686658859	0.137428596615791
612	0.0114815160632133	0.103013813495636	0.0174450594931841	0.0482250563800335	0.0741605386137962	0.0350561961531639	0.0581487864255905	0.104022152721882	0.182571500539780	0.0475392974913120	0.0662167817354202	0.109579317271709	0.131575867533684	0.212499305605888	0.118037380278111	0.229124307632446	0.235890969634056	0.183255985379219	0.182641029357910	0.239446446299553	0.166440844535828	0.192737892270088	0.194957852363586	0.223051846027374	0.178538635373116	0.156520143151283	0.137587487697601
614	0.0114728184416890	0.103150643408298	0.0174238756299019	0.0482094511389732	0.0742348358035088	0.0350075885653496	0.0580934733152390	0.104142799973488	0.182807371020317	0.0474934093654156	0.0661339238286018	0.109553612768650	0.131856665015221	0.212634548544884	0.118001922965050	0.228422448039055	0.235062345862389	0.182721704244614	0.182016924023628	0.238523095846176	0.165937036275864	0.191909790039063	0.194449767470360	0.222594961524010	0.178721562027931	0.156789168715477	0.137701764702797
616	0.0114785879850388	0.103275872766972	0.0174227114766836	0.0482323952019215	0.0743119195103645	0.0349840410053730	0.0580893754959106	0.104224927723408	0.183042436838150	0.0474817454814911	0.0661205276846886	0.109612554311752	0.132035166025162	0.212812274694443	0.118091188371181	0.227752834558487	0.234314471483231	0.182308048009872	0.181435048580170	0.237830042839050	0.165557369589806	0.191305682063103	0.194016546010971	0.221988216042519	0.178983554244041	0.157005578279495	0.137735933065414
618	0.0115215806290507	0.103643514215946	0.0175142530351877	0.0483995340764523	0.0745218545198441	0.0350273884832859	0.0581789612770081	0.104401916265488	0.183603569865227	0.0476045906543732	0.0662463158369064	0.109912931919098	0.132333725690842	0.213391974568367	0.118538215756416	0.227948650717735	0.234425991773605	0.182587638497353	0.181621998548508	0.238229542970657	0.165800660848618	0.191518932580948	0.194233566522598	0.221631556749344	0.179367899894714	0.157382369041443	0.137758359313011
620	0.0115592563524842	0.104048132896423	0.0176291000097990	0.0485759079456329	0.0747293159365654	0.0350718349218369	0.0582767128944397	0.104656293988228	0.184264257550240	0.0477303266525269	0.0663662329316139	0.110236950218678	0.132577463984489	0.213879793882370	0.118996232748032	0.228758171200752	0.234933152794838	0.183291897177696	0.182275339961052	0.239240527153015	0.166424900293350	0.192042976617813	0.194815635681152	0.221966296434402	0.179481029510498	0.157627239823341	0.137750357389450
622	0.0115195922553539	0.104047991335392	0.0176249165087938	0.0485530644655228	0.0746712610125542	0.0350029058754444	0.0582074970006943	0.104675427079201	0.184355571866035	0.0476631373167038	0.0662679225206375	0.110215932130814	0.132510840892792	0.213529646396637	0.119005993008614	0.229313924908638	0.235228896141052	0.183732360601425	0.182722747325897	0.239832639694214	0.166800901293755	0.192316070199013	0.195191994309425	0.222822904586792	0.179145932197571	0.157360360026360	0.137509822845459
624	0.0113809863105416	0.103733606636524	0.0174949876964092	0.0483700782060623	0.0743523910641670	0.0348015576601028	0.0578897073864937	0.104322098195553	0.183963984251022	0.0474327206611633	0.0659637823700905	0.109924532473087	0.132267370820045	0.212575107812881	0.118739195168018	0.229547172784805	0.235246911644936	0.184046760201454	0.183102265000343	0.240283131599426	0.167033106088638	0.192486286163330	0.195514008402824	0.223621085286140	0.178793624043465	0.156825765967369	0.137041583657265
626	0.0112867522984743	0.103543497622013	0.0173936150968075	0.0482648052275181	0.0741628855466843	0.0346878953278065	0.0576522760093212	0.104008920490742	0.183686479926109	0.0473118424415588	0.0657950043678284	0.109769858419895	0.132202282547951	0.212171927094460	0.118692710995674	0.229769200086594	0.235291078686714	0.184329152107239	0.183463558554649	0.240642428398132	0.167297303676605	0.192670896649361	0.195870414376259	0.224098697304726	0.179076895117760	0.156730860471725	0.136931732296944
628	0.0113140810281038	0.103787444531918	0.0174211040139198	0.0484113730490208	0.0743645131587982	0.0347569324076176	0.0577039048075676	0.104161001741886	0.184094548225403	0.0474461391568184	0.0659110546112061	0.110069282352924	0.132618367671967	0.212894067168236	0.119186446070671	0.230017855763435	0.235534757375717	0.184505179524422	0.183783769607544	0.240894675254822	0.167646735906601	0.193015456199646	0.196275770664215	0.224608778953552	0.180065467953682	0.157502308487892	0.137622907757759
630	0.0113779213279486	0.104233987629414	0.0174996182322502	0.0486684441566467	0.0747247561812401	0.0348692908883095	0.0578651763498783	0.104671455919743	0.184856161475182	0.0476509593427181	0.0661018267273903	0.110567905008793	0.133199572563171	0.213859841227531	0.119821168482304	0.230589210987091	0.236154839396477	0.184826105833054	0.184454858303070	0.241287514567375	0.168318241834641	0.193817391991615	0.197084844112396	0.225073426961899	0.181011930108070	0.158464267849922	0.138514816761017
632	0.0113924536854029	0.104481063783169	0.0175279583781958	0.0488027334213257	0.0749036148190498	0.0349137336015701	0.0579615086317062	0.105003863573074	0.185253471136093	0.0477299615740776	0.0661908909678459	0.110916145145893	0.133635416626930	0.214347481727600	0.120255917310715	0.231139734387398	0.236741542816162	0.185142129659653	0.185074031352997	0.241730064153671	0.168855205178261	0.194552958011627	0.197873353958130	0.225479021668434	0.181897506117821	0.159049496054649	0.139093056321144
634	0.0113499341532588	0.104679614305496	0.0175007134675980	0.0489595755934715	0.0749741941690445	0.0349589586257935	0.0580495446920395	0.105145566165447	0.185577049851418	0.0477719083428383	0.0662670210003853	0.111365914344788	0.134285256266594	0.215030774474144	0.120898284018040	0.231830641627312	0.237415850162506	0.185653939843178	0.185915291309357	0.242955952882767	0.169566482305527	0.195654332637787	0.199017316102982	0.225987732410431	0.182968363165855	0.159815728664398	0.139909029006958
636	0.0113103957846761	0.104825049638748	0.0174768101423979	0.0491253808140755	0.0750176683068276	0.0350046567618847	0.0581347532570362	0.105258643627167	0.185854300856590	0.0478050634264946	0.0663352087140083	0.111758619546890	0.134760960936546	0.215576812624931	0.121492356061935	0.232813760638237	0.238222360610962	0.186312183737755	0.187063887715340	0.244568660855293	0.170505464076996	0.197034314274788	0.200468212366104	0.226614028215408	0.183863505721092	0.160402983427048	0.140578418970108
638	0.0113170836120844	0.104910701513290	0.0174998231232166	0.0492717884480953	0.0751047506928444	0.0350293442606926	0.0581638887524605	0.105315156280994	0.185985580086708	0.0478399097919464	0.0663979500532150	0.112032510340214	0.135112792253494	0.216009125113487	0.122061498463154	0.233364999294281	0.238685384392738	0.186715543270111	0.187761187553406	0.245405152440071	0.171025887131691	0.197855785489082	0.201459988951683	0.227382540702820	0.184953078627586	0.161060363054276	0.141149938106537
640	0.0113489283248782	0.105041287839413	0.0175633896142244	0.0494551174342632	0.0752472281455994	0.0350505560636520	0.0581789091229439	0.105417847633362	0.186177164316177	0.0478866174817085	0.0664617419242859	0.112395562231541	0.135511711239815	0.216611906886101	0.122684858739376	0.233835175633430	0.239236935973167	0.187243297696114	0.188467741012573	0.246054098010063	0.171631500124931	0.198821470141411	0.202718451619148	0.228140428662300	0.185953125357628	0.161867558956146	0.141799777746201
642	0.0113672250881791	0.105109609663486	0.0176021307706833	0.0495558828115463	0.0753350928425789	0.0350582748651505	0.0581848695874214	0.105495952069759	0.186326563358307	0.0479033142328262	0.0664849579334259	0.112624906003475	0.135726541280746	0.217045620083809	0.123025439679623	0.234283477067947	0.239803954958916	0.187718018889427	0.189144685864449	0.246693134307861	0.172192677855492	0.199667826294899	0.203900322318077	0.228782221674919	0.186675727367401	0.162345051765442	0.142176225781441
644	0.0113742919638753	0.105155102908611	0.0175942163914442	0.0496677197515965	0.0754098296165466	0.0350534133613110	0.0581769198179245	0.105580948293209	0.186587437987328	0.0479106307029724	0.0665419176220894	0.112795464694500	0.135998323559761	0.217695146799088	0.123456686735153	0.234799265861511	0.240392968058586	0.188197627663612	0.189887732267380	0.247772365808487	0.172735095024109	0.200585350394249	0.204966977238655	0.229504197835922	0.187461227178574	0.162936747074127	0.142603263258934
646	0.0113754849880934	0.105218924582005	0.0175725724548101	0.0497890822589397	0.0754869133234024	0.0350488498806953	0.0581707693636417	0.105710253119469	0.186898782849312	0.0479187667369843	0.0666032433509827	0.112992927432060	0.136248111724854	0.218309506773949	0.123842582106590	0.235666483640671	0.241311788558960	0.188879385590553	0.190999835729599	0.249285131692886	0.173549294471741	0.201960310339928	0.206269413232803	0.230313330888748	0.188056185841560	0.163446724414825	0.142997831106186
648	0.0113445306196809	0.105277985334396	0.0175486858934164	0.0498454347252846	0.0755296424031258	0.0350605398416519	0.0581612735986710	0.105787903070450	0.187005966901779	0.0479574501514435	0.0666145756840706	0.113267071545124	0.136480703949928	0.218659877777100	0.124109864234924	0.236305952072144	0.241959199309349	0.189349666237831	0.191849261522293	0.250405132770538	0.174153834581375	0.202974274754524	0.207241043448448	0.231261149048805	0.188707724213600	0.163882553577423	0.143329218029976
650	0.0112585155293345	0.105380088090897	0.0175021886825562	0.0499083474278450	0.0755695626139641	0.0350849032402039	0.0581332109868526	0.105821974575520	0.187057942152023	0.0480537302792072	0.0666196942329407	0.113790147006512	0.136907979846001	0.219068840146065	0.124532081186771	0.237187713384628	0.242806121706963	0.190025821328163	0.192928463220596	0.251767933368683	0.175045683979988	0.204212382435799	0.208606421947479	0.232083648443222	0.189360141754150	0.164522990584373	0.143809214234352
652	0.0112095084041357	0.105478890240192	0.0174795724451542	0.0499762818217278	0.0756171569228172	0.0351072214543819	0.0581281334161758	0.105842225253582	0.187134459614754	0.0481248646974564	0.0666510090231895	0.114191487431526	0.137256130576134	0.219363018870354	0.124972239136696	0.238131225109100	0.243651255965233	0.190697312355042	0.193977445363998	0.253010779619217	0.175934582948685	0.205260783433914	0.209891244769096	0.232552587985992	0.189784660935402	0.164940968155861	0.144143372774124
654	0.0112726325169206	0.105714440345764	0.0175453368574381	0.0501378141343594	0.0757748261094093	0.0351808033883572	0.0582458227872849	0.105959020555019	0.187463179230690	0.0481874570250511	0.0667736828327179	0.114492096006870	0.137713983654976	0.219897463917732	0.125652447342873	0.238523021340370	0.243910431861877	0.190972447395325	0.194464713335037	0.253668963909149	0.176380142569542	0.205570355057716	0.210338503122330	0.232928514480591	0.190261721611023	0.165438786149025	0.144460022449493
656	0.0113794188946486	0.106054060161114	0.0176607146859169	0.0503527894616127	0.0759911164641380	0.0352757722139359	0.0584433600306511	0.106212429702282	0.187988102436066	0.0482688471674919	0.0669311434030533	0.114823713898659	0.138161003589630	0.220521807670593	0.126363247632980	0.238835647702217	0.244035542011261	0.191220864653587	0.195048898458481	0.254280209541321	0.176835700869560	0.205777019262314	0.210592940449715	0.233246475458145	0.190622791647911	0.165931001305580	0.144786417484283
658	0.0114130554720759	0.106225825846195	0.0177122149616480	0.0504309572279453	0.0761025622487068	0.0352912135422230	0.0585112161934376	0.106380790472031	0.188284784555435	0.0483154430985451	0.0669789463281632	0.114953212440014	0.138259202241898	0.220732256770134	0.126750394701958	0.239038586616516	0.244099006056786	0.191467002034187	0.195590719580650	0.254641085863113	0.177156209945679	0.205886170268059	0.210741743445396	0.233626306056976	0.190816342830658	0.166155695915222	0.144989654421806
660	0.0113835418596864	0.106430649757385	0.0177258737385273	0.0504272766411305	0.0762318000197411	0.0352412275969982	0.0584492273628712	0.106499478220940	0.188598036766052	0.0483439229428768	0.0669614002108574	0.114993549883366	0.138214230537415	0.220763221383095	0.127195656299591	0.239264354109764	0.244092985987663	0.191908627748489	0.196275636553764	0.254912644624710	0.177405744791031	0.205792844295502	0.210845217108727	0.234208464622498	0.191073358058929	0.166401356458664	0.145268172025681
662	0.0113442139700055	0.106620989739895	0.0177244450896978	0.0504328869283199	0.0763387829065323	0.0351950861513615	0.0583891943097115	0.106616526842117	0.188875809311867	0.0483417101204395	0.0669553577899933	0.115107871592045	0.138256236910820	0.220825508236885	0.127672061324120	0.239678278565407	0.244192659854889	0.192460626363754	0.197263568639755	0.255292236804962	0.177784830331802	0.205774024128914	0.211096495389938	0.235024154186249	0.191586866974831	0.166715428233147	0.145600065588951
664	0.0112834637984633	0.106682710349560	0.0176881831139326	0.0504946410655975	0.0764043480157852	0.0351551249623299	0.0584139302372932	0.106681510806084	0.189077198505402	0.0482785776257515	0.0669938474893570	0.115465439856052	0.138732776045799	0.221295684576035	0.128454968333244	0.240348577499390	0.244670435786247	0.193035885691643	0.198505386710167	0.256263375282288	0.178454712033272	0.206358224153519	0.211925387382507	0.236352130770683	0.192804604768753	0.167543679475784	0.146233931183815
666	0.0111787309870124	0.106700472533703	0.0176079999655485	0.0506306812167168	0.0764731392264366	0.0350926592946053	0.0585045553743839	0.106776781380177	0.189400464296341	0.0482048355042934	0.0670602321624756	0.116094000637531	0.139551490545273	0.222201600670815	0.129567340016365	0.241907507181168	0.246198862791061	0.194208145141602	0.200785532593727	0.258610188961029	0.179932385683060	0.208094283938408	0.214174658060074	0.237983837723732	0.194541200995445	0.168881163001060	0.147276684641838
668	0.0111215198412538	0.106748782098293	0.0175602957606316	0.0508506856858730	0.0765434578061104	0.0350992791354656	0.0586262270808220	0.106908045709133	0.189690187573433	0.0482643023133278	0.0671724602580071	0.116855069994926	0.140436604619026	0.223498493432999	0.130825802683830	0.243678927421570	0.248198613524437	0.195484682917595	0.203528851270676	0.261586219072342	0.181659862399101	0.210456907749176	0.217168614268303	0.239924982190132	0.197140961885452	0.170561790466309	0.148749217391014
670	0.0111022358760238	0.106967099010944	0.0175537131726742	0.0513541847467423	0.0767784342169762	0.0352862179279327	0.0589368864893913	0.107229821383953	0.190313890576363	0.0485721565783024	0.0675305947661400	0.118348389863968	0.141997396945953	0.226271674036980	0.132998779416084	0.245800852775574	0.250817179679871	0.197122380137444	0.206906035542488	0.265784412622452	0.184032246470451	0.214230298995972	0.221371009945869	0.242384552955627	0.201097071170807	0.173613995313644	0.151568815112114
672	0.0110984891653061	0.107234440743923	0.0175679028034210	0.0519915334880352	0.0770742744207382	0.0355203375220299	0.0593519285321236	0.107687674462795	0.191087201237679	0.0489514917135239	0.0679703950881958	0.120242424309254	0.143805786967278	0.229613825678825	0.135549813508987	0.249051839113235	0.254603028297424	0.199464067816734	0.211501613259316	0.271553069353104	0.187479674816132	0.219755023717880	0.227360144257545	0.245103672146797	0.205682933330536	0.177163422107697	0.154961958527565
674	0.0111360838636756	0.107459448277950	0.0176146887242794	0.0527220331132412	0.0773979425430298	0.0357443057000637	0.0597935728728771	0.108077362179756	0.191628649830818	0.0494135878980160	0.0685393735766411	0.122329756617546	0.145952835679054	0.233410075306892	0.138353332877159	0.252528458833694	0.258866429328918	0.201940163969994	0.216514527797699	0.277947366237640	0.191207021474838	0.226099535822868	0.234278485178947	0.248326852917671	0.211394906044006	0.181253328919411	0.158990338444710
676	0.0112285483628511	0.107816010713577	0.0177185200154781	0.0537959747016430	0.0779338777065277	0.0360850021243095	0.0605660602450371	0.108847424387932	0.192390933632851	0.0500983931124210	0.0694365054368973	0.125030055642128	0.148670226335526	0.238094970583916	0.141710653901100	0.257463842630386	0.264957159757614	0.205665543675423	0.222615838050842	0.286214351654053	0.196202725172043	0.234600067138672	0.243488505482674	0.252120614051819	0.217136308550835	0.185863971710205	0.163789600133896
678	0.0112737501040101	0.108054496347904	0.0177861880511045	0.0545562766492367	0.0782662704586983	0.0363014340400696	0.0611614398658276	0.109495431184769	0.192942202091217	0.0504790134727955	0.0700596421957016	0.127177730202675	0.150769025087357	0.241969108581543	0.144737645983696	0.261947214603424	0.270645231008530	0.208906739950180	0.228672668337822	0.294039875268936	0.200684070587158	0.242107599973679	0.251970827579498	0.255968093872070	0.221732392907143	0.189310684800148	0.167521655559540
680	0.0112231755629182	0.108240254223347	0.0177578963339329	0.0550564043223858	0.0784381702542305	0.0364027842879295	0.0615264177322388	0.109775990247726	0.193426653742790	0.0506289824843407	0.0705824866890907	0.129010900855064	0.152769312262535	0.245780363678932	0.147716775536537	0.264197200536728	0.274143278598785	0.210680857300758	0.233904913067818	0.300327479839325	0.203583955764771	0.247018337249756	0.257945030927658	0.259360373020172	0.225731924176216	0.192521438002586	0.170926809310913
682	0.0111537585034966	0.108466155827045	0.0177032668143511	0.0554728247225285	0.0786143764853478	0.0364795327186585	0.0618753954768181	0.110059060156345	0.194067060947418	0.0507396049797535	0.0710946768522263	0.130485191941261	0.154315218329430	0.248560786247253	0.150307923555374	0.266042709350586	0.277111828327179	0.212239071726799	0.238835155963898	0.305714547634125	0.206089437007904	0.250903189182282	0.262821018695831	0.261547446250916	0.227708861231804	0.194760218262672	0.173379853367805
684	0.0111645078286529	0.108721107244492	0.0177175868302584	0.0555829778313637	0.0788133516907692	0.0365531854331493	0.0620940588414669	0.110227786004543	0.194617614150047	0.0507512837648392	0.0715020075440407	0.130911305546761	0.154947057366371	0.249139308929443	0.152200803160667	0.266806185245514	0.278199881315231	0.212844222784042	0.241883665323257	0.307612717151642	0.207006499171257	0.251755654811859	0.264258205890656	0.262749373912811	0.227689623832703	0.195277616381645	0.173983976244926
686	0.0112682655453682	0.109269678592682	0.0178387630730867	0.0555687062442303	0.0792376697063446	0.0367056764662266	0.0623616650700569	0.110445640981197	0.195576399564743	0.0506565384566784	0.0720499306917191	0.130888760089874	0.155387952923775	0.248952180147171	0.153921753168106	0.266127854585648	0.276805579662323	0.212567061185837	0.244019225239754	0.307164967060089	0.206571906805038	0.248451411724091	0.262009382247925	0.263337433338165	0.226677820086479	0.195237442851067	0.173860579729080
688	0.0113537050783634	0.109725095331669	0.0179473143070936	0.0554770193994045	0.0795322433114052	0.0368051193654537	0.0625237450003624	0.110633261501789	0.196319431066513	0.0505100488662720	0.0723498985171318	0.130597010254860	0.155423000454903	0.248218864202499	0.154543474316597	0.264934688806534	0.274347960948944	0.211970612406731	0.245459645986557	0.306073844432831	0.205687269568443	0.243345648050308	0.258154213428497	0.263203144073486	0.224608018994331	0.194728627800941	0.173096135258675
690	0.0113771902397275	0.109951466321945	0.0179914031177759	0.0551246516406536	0.0795526653528214	0.0367102362215519	0.0624159239232540	0.110522940754890	0.196501046419144	0.0501471199095249	0.0722706168889999	0.129354506731033	0.154453799128532	0.245414644479752	0.153819367289543	0.263663411140442	0.271528989076614	0.210890293121338	0.244970813393593	0.303775578737259	0.204178407788277	0.237886831164360	0.253463029861450	0.262307226657867	0.220683172345161	0.192666038870811	0.170727208256722
692	0.0113909048959613	0.110189683735371	0.0180335398763418	0.0545527152717114	0.0795174986124039	0.0365374907851219	0.0621738620102406	0.110189765691757	0.196586593985558	0.0496814027428627	0.0721033811569214	0.127396300435066	0.153010815382004	0.241544708609581	0.152436792850494	0.261352419853210	0.267222106456757	0.208733171224594	0.242307767271996	0.298818349838257	0.201241463422775	0.231016293168068	0.246906563639641	0.260757684707642	0.216653078794479	0.189890131354332	0.167573675513268
694	0.0114178489893675	0.110398210585117	0.0180710256099701	0.0541247278451920	0.0795411318540573	0.0364725701510906	0.0619941949844360	0.110049463808537	0.196669667959213	0.0494781509041786	0.0719951391220093	0.125879526138306	0.151902228593826	0.238733455538750	0.150548592209816	0.259215474128723	0.263282179832459	0.206807404756546	0.238918066024780	0.293309509754181	0.198398023843765	0.225124910473824	0.240769356489182	0.258513212203980	0.213189631700516	0.187631323933601	0.165106773376465
696	0.0115053374320269	0.110819287598133	0.0181682687252760	0.0537049099802971	0.0796711519360542	0.0365128964185715	0.0617188662290573	0.110288560390472	0.196950420737267	0.0493545755743980	0.0717669874429703	0.124193869531155	0.150478810071945	0.235856518149376	0.147353097796440	0.256938785314560	0.259767234325409	0.204717010259628	0.233782589435577	0.286819964647293	0.195366248488426	0.220188319683075	0.234877794981003	0.255872517824173	0.209871888160706	0.185057923197746	0.162475839257240
698	0.0115806609392166	0.111195273697376	0.0182622615247965	0.0533479675650597	0.0797791406512260	0.0365610644221306	0.0614561364054680	0.110580697655678	0.197215393185616	0.0492564328014851	0.0715369433164597	0.122782029211521	0.149247258901596	0.233531206846237	0.144303843379021	0.254446685314178	0.256606221199036	0.202673375606537	0.227634400129318	0.280339062213898	0.192275866866112	0.216209992766380	0.229716300964355	0.253615617752075	0.207203328609467	0.182911261916161	0.160284489393234
700	0.0115747610107064	0.111300833523273	0.0182508006691933	0.0530668236315250	0.0797404199838638	0.0365456901490688	0.0612998865544796	0.110616341233253	0.197255551815033	0.0491547323763371	0.0712263062596321	0.121784992516041	0.147833794355392	0.231529697775841	0.141638994216919	0.253178775310516	0.255003899335861	0.201624289155006	0.222919166088104	0.275890797376633	0.190199077129364	0.213863089680672	0.226841494441032	0.251718997955322	0.204754039645195	0.180713370442390	0.158334374427795
702	0.0115418443456292	0.111348561942577	0.0181789100170136	0.0527714900672436	0.0796224400401115	0.0365028195083141	0.0610922649502754	0.110512070357800	0.197234302759171	0.0490434579551220	0.0707935914397240	0.120808795094490	0.146298199892044	0.229705661535263	0.139294967055321	0.252234339714050	0.253780692815781	0.200667098164558	0.218514382839203	0.272173970937729	0.188270330429077	0.211836904287338	0.224686473608017	0.250396192073822	0.203073173761368	0.178630217909813	0.156560182571411
704	0.0115508772432804	0.111422747373581	0.0181560609489679	0.0527041293680668	0.0795985311269760	0.0365259237587452	0.0610129982233048	0.110500819981098	0.197254553437233	0.0490680821239948	0.0706759393215179	0.120485611259937	0.145788222551346	0.229151993989944	0.138249516487122	0.251716405153275	0.253045350313187	0.200137183070183	0.215927243232727	0.270345330238342	0.187200441956520	0.210910618305206	0.223716855049133	0.249742701649666	0.202335476875305	0.177880853414536	0.155937924981117
706	0.0116684567183256	0.111677020788193	0.0182587280869484	0.0529316924512386	0.0797874704003334	0.0367385111749172	0.0612422563135624	0.110855661332607	0.197472527623177	0.0493209995329380	0.0709195733070374	0.120794817805290	0.145825117826462	0.229438826441765	0.137741729617119	0.252001792192459	0.253264039754868	0.200239166617394	0.215445026755333	0.270193964242935	0.187155038118362	0.211770147085190	0.224365681409836	0.249491333961487	0.202048078179359	0.177697747945786	0.155842974781990
708	0.0117972549051046	0.111965656280518	0.0183880180120468	0.0532127171754837	0.0800142288208008	0.0369753725826740	0.0615614503622055	0.111395545303822	0.197752296924591	0.0495784543454647	0.0712080150842667	0.121245481073856	0.145981058478355	0.229949787259102	0.137584984302521	0.252716690301895	0.254001319408417	0.200543209910393	0.215461269021034	0.270440250635147	0.187413424253464	0.213386446237564	0.225801229476929	0.249538585543633	0.202321439981461	0.177762001752853	0.155886486172676
710	0.0118596972897649	0.112173832952976	0.0184348560869694	0.0534715391695499	0.0801446512341499	0.0371509790420532	0.0617964081466198	0.111746661365032	0.198094680905342	0.0497296825051308	0.0715182051062584	0.121891602873802	0.146516799926758	0.230984732508659	0.138179838657379	0.253313213586807	0.254719376564026	0.200818538665771	0.215799003839493	0.271158397197723	0.187828272581100	0.214773878455162	0.227468729019165	0.249795645475388	0.203434929251671	0.178424075245857	0.156320318579674
712	0.0119356121867895	0.112499214708805	0.0184745322912931	0.0538554787635803	0.0803022906184197	0.0373954288661480	0.0621547102928162	0.112222194671631	0.198783576488495	0.0499087348580360	0.0720447152853012	0.123018339276314	0.147429004311562	0.232542201876640	0.139249771833420	0.254375845193863	0.255998998880386	0.201332673430443	0.217029646039009	0.273003190755844	0.188904598355293	0.216818317770958	0.230435192584991	0.250267505645752	0.204561054706574	0.179503157734871	0.157114923000336
714	0.0119881751015782	0.112716428935528	0.0185032486915588	0.0540723763406277	0.0804201737046242	0.0375641249120235	0.0624191686511040	0.112595826387405	0.199274390935898	0.0500367581844330	0.0724482014775276	0.123716197907925	0.147863015532494	0.233379408717155	0.139683246612549	0.255267441272736	0.257067352533340	0.201699405908585	0.217979714274406	0.274171382188797	0.189698427915573	0.218290790915489	0.232888534665108	0.250718593597412	0.205026805400848	0.180030122399330	0.157563254237175
716	0.0120318867266178	0.112876631319523	0.0184983350336552	0.0541563816368580	0.0806027948856354	0.0377812273800373	0.0627047419548035	0.112849213182926	0.199710458517075	0.0502096153795719	0.0729568675160408	0.124151907861233	0.148003041744232	0.234113901853561	0.139660179615021	0.255457133054733	0.257457911968231	0.201540216803551	0.217605814337730	0.273812294006348	0.189580440521240	0.218711808323860	0.234079807996750	0.250964373350143	0.205336913466454	0.180421367287636	0.157942578196526
718	0.0120903570204973	0.113036371767521	0.0184833556413651	0.0542200282216072	0.0807806476950645	0.0380174666643143	0.0630626305937767	0.113208152353764	0.200190544128418	0.0503753833472729	0.0734550058841705	0.124528989195824	0.148012772202492	0.234614357352257	0.139471545815468	0.255538254976273	0.257762432098389	0.201139226555824	0.216495648026466	0.272808223962784	0.189157962799072	0.218896657228470	0.235028177499771	0.250910937786102	0.205335065722466	0.180623993277550	0.158175751566887
720	0.0121655622497201	0.113149054348469	0.0184868369251490	0.0542538501322269	0.0808613374829292	0.0381832234561443	0.0633004456758499	0.113437898457050	0.200434014201164	0.0504333153367043	0.0737748816609383	0.124640323221684	0.147669449448586	0.234294369816780	0.138782128691673	0.255516111850739	0.257664978504181	0.200742498040199	0.215242788195610	0.271693408489227	0.188594460487366	0.218547344207764	0.235204190015793	0.250614851713181	0.204655423760414	0.180152535438538	0.157893031835556
722	0.0122997229918838	0.113299362361431	0.0185285061597824	0.0542869530618191	0.0809956267476082	0.0384459160268307	0.0636398121714592	0.113725103437901	0.200754389166832	0.0504925362765789	0.0742122828960419	0.124636702239513	0.146994128823280	0.233450412750244	0.137368336319923	0.255051285028458	0.256772458553314	0.199907466769218	0.212822958827019	0.269572585821152	0.187178850173950	0.217130243778229	0.234356671571732	0.250095218420029	0.203709512948990	0.179192036390305	0.157275393605232
724	0.0124107915908098	0.113423496484756	0.0185743924230337	0.0543010346591473	0.0811173990368843	0.0386735238134861	0.0639583542943001	0.113997794687748	0.201025366783142	0.0505617260932922	0.0745841562747955	0.124635517597198	0.146548852324486	0.232883736491203	0.136148989200592	0.254527240991592	0.255857020616531	0.199141755700111	0.210224732756615	0.267576843500137	0.185804903507233	0.215741306543350	0.233510211110115	0.249497979879379	0.202937722206116	0.178582265973091	0.156897485256195
726	0.0125335631892085	0.113643638789654	0.0186355523765087	0.0543244071304798	0.0813454687595367	0.0390043295919895	0.0643602609634399	0.114254288375378	0.201332911849022	0.0506769604980946	0.0751287639141083	0.124739341437817	0.146047636866570	0.232198923826218	0.134773626923561	0.254456520080566	0.255486935377121	0.198736414313316	0.208414658904076	0.266139835119247	0.185018390417099	0.214855894446373	0.233449980616570	0.248992457985878	0.201996073126793	0.177931204438210	0.156503900885582
728	0.0126795433461666	0.113931626081467	0.0187179762870073	0.0543586090207100	0.0816272571682930	0.0393970347940922	0.0648818686604500	0.114634767174721	0.201761111617088	0.0508019663393498	0.0757597535848618	0.124917283654213	0.145574510097504	0.231547191739082	0.133537694811821	0.254633635282517	0.255211472511292	0.198288157582283	0.206560492515564	0.264630705118179	0.184195160865784	0.213930681347847	0.233716323971748	0.248819708824158	0.201368764042854	0.177410617470741	0.156189888715744
730	0.0127605004236102	0.114091314375401	0.0187499653548002	0.0544216930866241	0.0818070769309998	0.0396271385252476	0.0652268603444099	0.114910818636417	0.202129364013672	0.0508856773376465	0.0762556567788124	0.125190764665604	0.145468384027481	0.231484532356262	0.132942542433739	0.254830777645111	0.255169034004211	0.198011785745621	0.205425485968590	0.263814866542816	0.183642193675041	0.213473021984100	0.234135597944260	0.249050438404083	0.201051592826843	0.177433773875237	0.156339824199677
732	0.0128458207473159	0.114316724240780	0.0187433697283268	0.0545706897974014	0.0820525214076042	0.0399179868400097	0.0656853169202805	0.115352004766464	0.202815473079681	0.0510262362658978	0.0769651979207993	0.125736296176910	0.145488202571869	0.231817632913589	0.132414519786835	0.255126297473907	0.255394339561462	0.197680756449699	0.204505339264870	0.263000905513763	0.182912290096283	0.213193848729134	0.235129684209824	0.249497279524803	0.200894013047218	0.177747115492821	0.156756296753883
734	0.0129190012812614	0.114553451538086	0.0187389831990004	0.0547154508531094	0.0822364315390587	0.0401653349399567	0.0661270320415497	0.115802466869354	0.203437998890877	0.0511626936495304	0.0775647759437561	0.126204773783684	0.145530059933662	0.232146412134171	0.132091194391251	0.255499571561813	0.255611240863800	0.197415784001350	0.203732550144196	0.262177109718323	0.182253733277321	0.212988078594208	0.236237019300461	0.249983400106430	0.201090693473816	0.178085923194885	0.157079562544823
736	0.0130183398723602	0.114918790757656	0.0187755320221186	0.0549566522240639	0.0825168341398239	0.0404720790684223	0.0665883272886276	0.116131462156773	0.204100459814072	0.0513578318059444	0.0782557949423790	0.126780390739441	0.145708516240120	0.232581079006195	0.131832614541054	0.255998164415360	0.255776017904282	0.197406560182571	0.203195422887802	0.261577844619751	0.182004272937775	0.212902188301086	0.237264439463615	0.250565052032471	0.201621711254120	0.178921341896057	0.157571211457253
738	0.0131475636735559	0.115386478602886	0.0188400745391846	0.0552745498716831	0.0829219222068787	0.0408533774316311	0.0671632736921310	0.116623498499393	0.205047547817230	0.0515633225440979	0.0790097787976265	0.127489313483238	0.145961791276932	0.232984289526939	0.131541445851326	0.256974965333939	0.256117761135101	0.197446033358574	0.202450811862946	0.260951846837997	0.181815803050995	0.212824016809464	0.238726913928986	0.251295566558838	0.202039420604706	0.179843023419380	0.158083677291870
740	0.0131933987140656	0.115611784160137	0.0188636388629675	0.0553835816681385	0.0831527858972549	0.0410567522048950	0.0674581229686737	0.116957679390907	0.205595523118973	0.0516393631696701	0.0793818086385727	0.127767994999886	0.146030828356743	0.233064368367195	0.131200835108757	0.257630825042725	0.256276071071625	0.197389110922813	0.201776370406151	0.260476499795914	0.181704401969910	0.212759718298912	0.239596173167229	0.252270221710205	0.202342152595520	0.180345818400383	0.158238708972931
742	0.0131965838372707	0.115779496729374	0.0188364796340466	0.0553899444639683	0.0834164917469025	0.0412495844066143	0.0676843374967575	0.117318466305733	0.206135571002960	0.0516779497265816	0.0797224342823029	0.127896338701248	0.145984500646591	0.233068794012070	0.130580961704254	0.257959336042404	0.256047189235687	0.197040617465973	0.200638964772224	0.259477883577347	0.181488931179047	0.212535709142685	0.239966109395027	0.253322929143906	0.202712759375572	0.180922135710716	0.158301442861557
744	0.0131935775279999	0.115908555686474	0.0188067965209484	0.0553793944418430	0.0836350023746491	0.0413743779063225	0.0678349956870079	0.117685988545418	0.206612884998322	0.0516825430095196	0.0798968523740768	0.127939149737358	0.145942375063896	0.233054205775261	0.130113080143929	0.258277267217636	0.255711019039154	0.196700140833855	0.199447214603424	0.258429467678070	0.181220456957817	0.212240219116211	0.240179210901260	0.254110038280487	0.203034281730652	0.181354239583015	0.158293202519417
746	0.0131573909893632	0.116077579557896	0.0187872238457203	0.0554007105529308	0.0838679373264313	0.0413539484143257	0.0677492916584015	0.117863371968269	0.207041934132576	0.0516199283301830	0.0797971114516258	0.127795577049255	0.145880505442619	0.232847064733505	0.129716813564301	0.258490234613419	0.255454421043396	0.196726545691490	0.198860719799995	0.257913351058960	0.181104853749275	0.211845263838768	0.240129485726357	0.254797697067261	0.203378856182098	0.182074204087257	0.158141732215881
748	0.0130877252668142	0.116344898939133	0.0187500361353159	0.0554271675646305	0.0841719806194305	0.0412702336907387	0.0675114542245865	0.118035823106766	0.207612007856369	0.0515154302120209	0.0795973092317581	0.127517297863960	0.145774677395821	0.232500180602074	0.129314810037613	0.258829712867737	0.255086272954941	0.196962550282478	0.198280677199364	0.257469117641449	0.180996596813202	0.211187124252319	0.239889219403267	0.255368620157242	0.203600496053696	0.182890012860298	0.157901182770729
750	0.0130464835092425	0.116466365754604	0.0187260694801807	0.0554192364215851	0.0842732489109039	0.0411932840943337	0.0673076584935188	0.118093430995941	0.207859814167023	0.0514083765447140	0.0793864503502846	0.127251327037811	0.145628139376640	0.232091635465622	0.129067003726959	0.259046137332916	0.254745900630951	0.197141632437706	0.197916537523270	0.257145792245865	0.180995255708694	0.210825473070145	0.239635258913040	0.255894452333450	0.203734517097473	0.183291435241699	0.157598167657852
752	0.0130073158070445	0.116440631449223	0.0187201909720898	0.0553978718817234	0.0842490941286087	0.0410224273800850	0.0669703558087349	0.117962881922722	0.207932248711586	0.0511915907263756	0.0789314582943916	0.126718729734421	0.145315900444984	0.231330588459969	0.128727316856384	0.259038627147675	0.254097938537598	0.197298586368561	0.197693198919296	0.256631195545197	0.181376084685326	0.210658758878708	0.238956734538078	0.256427943706512	0.203878998756409	0.183716073632240	0.156955331563950
754	0.0129694519564509	0.116374544799328	0.0187272280454636	0.0553780496120453	0.0842204615473747	0.0408497788012028	0.0666324049234390	0.117772549390793	0.207949027419090	0.0510164871811867	0.0785009115934372	0.126206234097481	0.145116597414017	0.230772703886032	0.128542676568031	0.259037613868713	0.253329068422318	0.197464480996132	0.197575688362122	0.256256759166718	0.181898579001427	0.210504412651062	0.238123252987862	0.256762832403183	0.204042211174965	0.183991640806198	0.156455606222153
756	0.0129480333998799	0.116354405879974	0.0187761206179857	0.0553680881857872	0.0842390060424805	0.0406633280217648	0.0663543045520783	0.117642499506474	0.207845702767372	0.0509308986365795	0.0780302360653877	0.125761970877647	0.145060807466507	0.230314195156097	0.128859594464302	0.259130924940109	0.252986073493958	0.197630211710930	0.197871178388596	0.256555199623108	0.182306766510010	0.210467174649239	0.237552955746651	0.256894916296005	0.204334378242493	0.184263959527016	0.156028971076012
758	0.0129258586093783	0.116366446018219	0.0188842974603176	0.0553539693355560	0.0842714309692383	0.0403902716934681	0.0659161061048508	0.117452897131443	0.207656860351563	0.0508575290441513	0.0773709714412689	0.125188365578651	0.144986569881439	0.229833990335464	0.129454359412193	0.259302288293839	0.252680838108063	0.197919651865959	0.198885783553123	0.257388263940811	0.182939678430557	0.210578307509422	0.236796587705612	0.256870329380035	0.204629406332970	0.184620484709740	0.155535787343979
760	0.0128763159736991	0.116326190531254	0.0189321003854275	0.0553129948675633	0.0842566192150116	0.0402002371847630	0.0655625164508820	0.117273114621639	0.207441821694374	0.0507873855531216	0.0768548846244812	0.124864824116230	0.144992694258690	0.229759573936462	0.129953131079674	0.259325891733170	0.252455949783325	0.198090165853500	0.199846148490906	0.258164286613464	0.183436855673790	0.210768982768059	0.236319616436958	0.256861180067062	0.204970136284828	0.184856578707695	0.155246317386627
762	0.0127156767994165	0.116127990186214	0.0188545901328325	0.0552042685449123	0.0840501040220261	0.0399088747799397	0.0650886967778206	0.116868779063225	0.206859141588211	0.0505998060107231	0.0761498436331749	0.124379917979240	0.145136103034019	0.229992553591728	0.130647197365761	0.258999973535538	0.252229422330856	0.198193699121475	0.200956568121910	0.259412288665772	0.184075370430946	0.211373090744019	0.236051112413406	0.256910473108292	0.205429688096046	0.185134798288345	0.154988408088684
764	0.0125500410795212	0.115931279957294	0.0187585651874542	0.0551296137273312	0.0838013440370560	0.0396149605512619	0.0646000355482101	0.116332605481148	0.206215336918831	0.0504314489662647	0.0755511596798897	0.123913764953613	0.145307630300522	0.230255931615829	0.131420820951462	0.258515059947968	0.252002179622650	0.198338150978088	0.202298596501350	0.260925561189652	0.184851929545403	0.212202653288841	0.235854580998421	0.256837040185928	0.205850005149841	0.185276865959167	0.154899746179581
766	0.0124624641612172	0.115804754197598	0.0187374576926231	0.0551719181239605	0.0835755169391632	0.0393837429583073	0.0642822086811066	0.116049371659756	0.205779984593391	0.0503871589899063	0.0751587525010109	0.123779781162739	0.145736739039421	0.230714038014412	0.132846936583519	0.258233994245529	0.252123206853867	0.198535338044167	0.203632906079292	0.262224346399307	0.185577020049095	0.213122442364693	0.235879093408585	0.256438046693802	0.206500932574272	0.185291066765785	0.155106216669083
768	0.0123713752254844	0.115611843764782	0.0187436435371637	0.0552463680505753	0.0832714438438416	0.0390880107879639	0.0639169812202454	0.115740001201630	0.205184400081635	0.0503724366426468	0.0747120678424835	0.123698212206364	0.146304160356522	0.231267735362053	0.134587600827217	0.257897734642029	0.252595365047455	0.198858991265297	0.205847322940826	0.263881742954254	0.186768427491188	0.214548185467720	0.236086845397949	0.255805909633637	0.206900939345360	0.185233324766159	0.155321583151817
770	0.0123245483264327	0.115456700325012	0.0187448859214783	0.0552047304809094	0.0830498337745667	0.0388886518776417	0.0636409744620323	0.115459963679314	0.204676821827889	0.0503118038177490	0.0743538886308670	0.123461104929447	0.146373271942139	0.231246724724770	0.135113105177879	0.257533580064774	0.252777248620987	0.198959290981293	0.207179263234139	0.264602601528168	0.187388539314270	0.215179398655891	0.235870793461800	0.254765033721924	0.206409558653831	0.184736520051956	0.155055046081543
772	0.0122894104570150	0.115202821791172	0.0187136046588421	0.0549188479781151	0.0826324224472046	0.0385974645614624	0.0632091537117958	0.115053631365299	0.203836023807526	0.0500859990715981	0.0737215057015419	0.122683048248291	0.145928427577019	0.230549007654190	0.134887963533402	0.256659507751465	0.252176403999329	0.198521181941032	0.206915900111198	0.263957798480988	0.186932489275932	0.214491799473763	0.234196126461029	0.253206491470337	0.205220252275467	0.183216735720634	0.154052078723907
774	0.0122517086565495	0.114954926073551	0.0186691675335169	0.0545625351369381	0.0822116136550903	0.0382978655397892	0.0627070739865303	0.114522106945515	0.202940762042999	0.0498360209167004	0.0730452165007591	0.121717564761639	0.145351961255074	0.229546457529068	0.134387835860252	0.255266100168228	0.251153677701950	0.197848647832870	0.206082001328468	0.262711554765701	0.186073139309883	0.213237836956978	0.231471732258797	0.251493632793427	0.203583776950836	0.181423723697662	0.152860954403877
776	0.0122006582096219	0.114802718162537	0.0186522305011749	0.0541244298219681	0.0819383114576340	0.0380064360797405	0.0622284337878227	0.114100582897663	0.202371433377266	0.0495563074946404	0.0723535865545273	0.120585262775421	0.144289240241051	0.227570638060570	0.133121117949486	0.254126667976379	0.250058352947235	0.197243213653564	0.204748988151550	0.260770857334137	0.185013279318810	0.211604863405228	0.228406473994255	0.249551713466644	0.200702980160713	0.178948894143105	0.151068046689034
778	0.0121083473786712	0.114573664963245	0.0186478253453970	0.0534203797578812	0.0815974175930023	0.0376008972525597	0.0614715665578842	0.113437831401825	0.201626136898994	0.0491476580500603	0.0714602395892143	0.118951693177223	0.142723679542542	0.224701076745987	0.131222441792488	0.252452284097672	0.248102366924286	0.196289256215096	0.201813891530037	0.257226347923279	0.182915285229683	0.208639755845070	0.224123880267143	0.247708290815353	0.197504892945290	0.175852954387665	0.148559093475342
780	0.0120402975007892	0.114424645900726	0.0186476241797209	0.0529114454984665	0.0813731104135513	0.0373414643108845	0.0608973354101181	0.112898170948029	0.201159238815308	0.0488867945969105	0.0708247944712639	0.117582812905312	0.141624972224236	0.222662031650543	0.129687294363976	0.250753462314606	0.246062755584717	0.195396199822426	0.198876678943634	0.253947556018829	0.180929556488991	0.205695524811745	0.219981253147125	0.246063828468323	0.194778069853783	0.173464715480804	0.146594107151032
782	0.0119570437818766	0.114292569458485	0.0186207480728626	0.0524750128388405	0.0811323449015617	0.0370752997696400	0.0603830404579639	0.112404219806194	0.200727850198746	0.0485641732811928	0.0701192542910576	0.116097830235958	0.140398725867271	0.220663398504257	0.127894788980484	0.248610213398933	0.243568956851959	0.194042563438416	0.196056544780731	0.250735193490982	0.178975895047188	0.202617004513741	0.215864136815071	0.244218066334724	0.192156657576561	0.171024590730667	0.144449621438980
784	0.0118720447644591	0.114185929298401	0.0185851603746414	0.0520980730652809	0.0809034481644630	0.0368435680866241	0.0599195621907711	0.111848086118698	0.200306400656700	0.0482799485325813	0.0695129334926605	0.114860847592354	0.139414250850678	0.219076305627823	0.126367777585983	0.246032536029816	0.240789830684662	0.192451119422913	0.193122699856758	0.247610256075859	0.176964864134789	0.199546739459038	0.211888343095779	0.242308840155602	0.190250113606453	0.169143095612526	0.142713025212288
786	0.0118445949628949	0.114243954420090	0.0185998268425465	0.0519019663333893	0.0807861909270287	0.0367489270865917	0.0597347766160965	0.111629426479340	0.200208336114883	0.0481689870357513	0.0690816864371300	0.114174768328667	0.138786792755127	0.217893764376640	0.125277876853943	0.244592308998108	0.239210098981857	0.191531017422676	0.190985158085823	0.245254561305046	0.175658196210861	0.197346404194832	0.208957448601723	0.240356117486954	0.188601374626160	0.167710185050964	0.141606628894806
788	0.0118366722017527	0.114423684775829	0.0186630394309759	0.0517311356961727	0.0806819200515747	0.0366569645702839	0.0595231242477894	0.111472889780998	0.200216680765152	0.0480809807777405	0.0685681551694870	0.113433137536049	0.138179704546928	0.216575741767883	0.124188117682934	0.243353709578514	0.237822771072388	0.190555661916733	0.188842087984085	0.242725044488907	0.174291387200356	0.195167675614357	0.206197023391724	0.238904595375061	0.187209367752075	0.166332319378853	0.140552356839180
790	0.0118373306468129	0.114491641521454	0.0186931043863297	0.0516172535717487	0.0806177109479904	0.0365807302296162	0.0593259148299694	0.111324600875378	0.200139373540878	0.0480100736021996	0.0682384148240089	0.112869203090668	0.137803345918655	0.215655639767647	0.123451784253120	0.242412298917770	0.236870735883713	0.189981073141098	0.187450364232063	0.241115719079971	0.173391655087471	0.193749800324440	0.204388916492462	0.238010764122009	0.186047151684761	0.165526181459427	0.139869749546051
792	0.0118383867666125	0.114324629306793	0.0186592806130648	0.0514704324305058	0.0805097147822380	0.0364359319210053	0.0590258054435253	0.111007191240788	0.199748516082764	0.0478339344263077	0.0678854063153267	0.112158790230751	0.137229576706886	0.214518129825592	0.122664116322994	0.241724818944931	0.236196726560593	0.189753890037537	0.186752766370773	0.240285038948059	0.172928243875504	0.192941680550575	0.203275337815285	0.237300634384155	0.184890151023865	0.164651662111282	0.139161184430122
794	0.0118331117555499	0.114138565957546	0.0186117012053728	0.0513255372643471	0.0803948268294334	0.0362851954996586	0.0587169118225575	0.110569857060909	0.199317425489426	0.0476568378508091	0.0675683841109276	0.111493051052094	0.136773660778999	0.213717669248581	0.122138485312462	0.241044417023659	0.235526353120804	0.189556688070297	0.186222821474075	0.239798501133919	0.172576546669006	0.192331910133362	0.202394381165504	0.236924991011620	0.184292718768120	0.164082229137421	0.138684809207916
796	0.0117735126987100	0.114108592271805	0.0185794029384851	0.0512659735977650	0.0803526937961578	0.0361736491322517	0.0585522912442684	0.110381171107292	0.199134096503258	0.0475632101297379	0.0673013776540756	0.111176565289497	0.136595070362091	0.213482946157455	0.122153162956238	0.240804687142372	0.235265076160431	0.189445003867149	0.186186075210571	0.239855736494064	0.172556966543198	0.192114606499672	0.202076494693756	0.236745044589043	0.184144377708435	0.163940533995628	0.138631135225296
798	0.0116332126781344	0.114124149084091	0.0185272973030806	0.0512038953602314	0.0803193151950836	0.0360114723443985	0.0583235360682011	0.110298044979572	0.198899820446968	0.0474366098642349	0.0669196620583534	0.110922642052174	0.136419683694839	0.213306099176407	0.122288189828396	0.240720868110657	0.235178053379059	0.189369052648544	0.186498910188675	0.240098997950554	0.172803774476051	0.192066535353661	0.201860785484314	0.236565589904785	0.184202685952187	0.163838937878609	0.138667538762093
800	0.0115373879671097	0.114140562713146	0.0184900220483542	0.0511657930910587	0.0802731513977051	0.0358983166515827	0.0581634119153023	0.110279753804207	0.198760554194450	0.0473619885742664	0.0666820183396339	0.110798850655556	0.136404976248741	0.213280797004700	0.122326262295246	0.240683540701866	0.235150754451752	0.189372688531876	0.186785638332367	0.240257292985916	0.173009663820267	0.192111656069756	0.201719611883163	0.236367389559746	0.184407591819763	0.163817465305328	0.138635978102684
802	0.0114578511565924	0.114190429449081	0.0184536464512348	0.0511591322720051	0.0801402106881142	0.0357409194111824	0.0579985566437244	0.110254444181919	0.198803082108498	0.0473362393677235	0.0664597600698471	0.110655538737774	0.136636629700661	0.213427215814590	0.122304126620293	0.240728735923767	0.235193133354187	0.189512684941292	0.187066271901131	0.240519434213638	0.173167526721954	0.192130163311958	0.201777607202530	0.236239567399025	0.184708073735237	0.163940057158470	0.138545662164688
804	0.0113917374983430	0.114244170486927	0.0184124633669853	0.0511694960296154	0.0800382867455483	0.0355893187224865	0.0578202344477177	0.110178038477898	0.198900625109673	0.0473312884569168	0.0662789270281792	0.110481865704060	0.136823758482933	0.213494345545769	0.122329898178577	0.240794226527214	0.235310316085815	0.189704611897469	0.187426254153252	0.240868017077446	0.173365816473961	0.192108213901520	0.201927721500397	0.236319407820702	0.184844702482224	0.164072141051292	0.138458669185638
806	0.0113999694585800	0.114270806312561	0.0184097308665514	0.0511649772524834	0.0800423175096512	0.0355350710451603	0.0577370673418045	0.110080495476723	0.198955729603767	0.0472858138382435	0.0661263465881348	0.110306642949581	0.136760354042053	0.213317811489105	0.122464768588543	0.240950286388397	0.235444754362106	0.189918532967567	0.187838286161423	0.241293504834175	0.173599109053612	0.192178979516029	0.201961457729340	0.236604750156403	0.184855103492737	0.164141923189163	0.138212025165558
808	0.0114498371258378	0.114300280809402	0.0184435881674290	0.0511401817202568	0.0800562575459480	0.0354949645698071	0.0576454326510429	0.109912052750587	0.199009224772453	0.0471847504377365	0.0659046173095703	0.110088668763638	0.136635661125183	0.213091313838959	0.122613005340099	0.241558417677879	0.235679775476456	0.190413594245911	0.188699573278427	0.242002248764038	0.174124091863632	0.192481219768524	0.201932042837143	0.237063378095627	0.184873148798943	0.164187714457512	0.137828782200813
810	0.0114547787234187	0.114314585924149	0.0184566788375378	0.0511077456176281	0.0800315737724304	0.0354548320174217	0.0575828216969967	0.109768979251385	0.199007317423821	0.0470919311046600	0.0657560676336289	0.109963528811932	0.136599943041801	0.212968915700912	0.122657604515553	0.242004945874214	0.235781967639923	0.190756008028984	0.189309075474739	0.242408722639084	0.174496948719025	0.192671805620193	0.201931312680244	0.237574219703674	0.184957832098007	0.164171785116196	0.137663632631302
812	0.0113326599821448	0.114330358803272	0.0183854289352894	0.0510058775544167	0.0798967257142067	0.0353233925998211	0.0574691370129585	0.109601020812988	0.198926180601120	0.0469261109828949	0.0655030086636543	0.109673835337162	0.136581391096115	0.212796047329903	0.122643135488033	0.241671636700630	0.235530227422714	0.190822854638100	0.189403995871544	0.242470771074295	0.174674779176712	0.192639127373695	0.201727584004402	0.237914249300957	0.185128062963486	0.164079532027245	0.137671664357185
814	0.0112006813287735	0.114350907504559	0.0183025542646647	0.0509189032018185	0.0797633677721024	0.0351914018392563	0.0573356598615646	0.109418794512749	0.198869481682777	0.0467828325927258	0.0652810409665108	0.109357990324497	0.136554807424545	0.212680712342262	0.122643038630486	0.241139650344849	0.235248625278473	0.190843045711517	0.189391314983368	0.242573693394661	0.174836024641991	0.192606940865517	0.201443046331406	0.237850785255432	0.185357645153999	0.164031997323036	0.137709096074104
816	0.0111970007419586	0.114439159631729	0.0183285828679800	0.0510094612836838	0.0798245966434479	0.0351968966424465	0.0573047734797001	0.109423756599426	0.199027210474014	0.0468149222433567	0.0652986839413643	0.109277658164501	0.136745706200600	0.212842002511024	0.122822090983391	0.241183221340179	0.235481366515160	0.191022753715515	0.189597979187965	0.243023425340652	0.175095230340958	0.192821815609932	0.201520934700966	0.237608850002289	0.185743451118469	0.164177611470222	0.137786582112312
818	0.0112599506974220	0.114643909037113	0.0184477046132088	0.0512165091931820	0.0800223425030708	0.0352821163833141	0.0573272444307804	0.109635718166828	0.199399143457413	0.0469369068741798	0.0654236450791359	0.109289966523647	0.137126266956329	0.213159769773483	0.123079709708691	0.241795003414154	0.236366376280785	0.191469296813011	0.190358981490135	0.243912413716316	0.175706282258034	0.193385273218155	0.201927930116653	0.237662881612778	0.185914859175682	0.164354622364044	0.137853339314461
820	0.0112828100100160	0.114741653203964	0.0185126606374979	0.0512933880090714	0.0800871700048447	0.0353040285408497	0.0573086477816105	0.109797872602940	0.199587792158127	0.0469967126846314	0.0654349923133850	0.109246134757996	0.137246981263161	0.213179126381874	0.122996546328068	0.242147997021675	0.236933946609497	0.191711440682411	0.190721794962883	0.244214683771133	0.176038771867752	0.193621873855591	0.201981008052826	0.238019511103630	0.185449644923210	0.164125859737396	0.137684017419815
822	0.0112017877399921	0.114653430879116	0.0184835121035576	0.0511453747749329	0.0799317508935928	0.0351553484797478	0.0571031123399735	0.109707519412041	0.199437916278839	0.0469673685729504	0.0652017742395401	0.108896657824516	0.137056693434715	0.212835997343063	0.122475475072861	0.241721197962761	0.236570447683334	0.191565513610840	0.189853802323341	0.243228033185005	0.175653114914894	0.193142727017403	0.200821742415428	0.238108709454536	0.184592813253403	0.163161754608154	0.137061953544617
824	0.0111137544736266	0.114575177431107	0.0184478722512722	0.0509695261716843	0.0797867327928543	0.0350070111453533	0.0568703934550285	0.109544083476067	0.199274241924286	0.0469567701220512	0.0649920850992203	0.108565762639046	0.136850357055664	0.212586238980293	0.122124195098877	0.241072878241539	0.235881939530373	0.191301718354225	0.188629478216171	0.241917848587036	0.175037696957588	0.192472785711288	0.199209883809090	0.237683981657028	0.184094995260239	0.162389114499092	0.136508762836456
826	0.0111313508823514	0.114780463278294	0.0184838287532330	0.0509325787425041	0.0798687115311623	0.0350326225161552	0.0568425059318543	0.109599865972996	0.199531242251396	0.0470396764576435	0.0650083124637604	0.108535192906857	0.136901095509529	0.212789475917816	0.122180402278900	0.240818813443184	0.235608533024788	0.191115289926529	0.187959745526314	0.241099387407303	0.174669489264488	0.191996410489082	0.198230281472206	0.236949369311333	0.183763042092323	0.162049561738968	0.136172086000443
828	0.0112045146524906	0.115243412554264	0.0185821596533060	0.0509395152330399	0.0800644308328629	0.0351380109786987	0.0569124408066273	0.109945967793465	0.200227275490761	0.0471799597144127	0.0650998279452324	0.108604766428471	0.137077674269676	0.213153511285782	0.122276604175568	0.240586519241333	0.235503703355789	0.190876230597496	0.187065795063972	0.240299314260483	0.174291625618935	0.191303238272667	0.197196260094643	0.236284911632538	0.183370232582092	0.161740228533745	0.135864093899727
830	0.0112262936308980	0.115459255874157	0.0186246968805790	0.0509052053093910	0.0801290273666382	0.0351632311940193	0.0569458082318306	0.110173307359219	0.200584024190903	0.0471970662474632	0.0650784894824028	0.108582168817520	0.137105152010918	0.213115096092224	0.122216783463955	0.240521207451820	0.235544413328171	0.190816715359688	0.186517626047134	0.240016847848892	0.174172252416611	0.190943598747253	0.196639508008957	0.235905125737190	0.182789877057076	0.161443158984184	0.135628238320351
832	0.0111621208488941	0.115376591682434	0.0185689348727465	0.0507275946438313	0.0800552666187286	0.0350537039339542	0.0568446367979050	0.110067799687386	0.200462758541107	0.0470158979296684	0.0648486390709877	0.108254276216030	0.136913746595383	0.212562754750252	0.121963344514370	0.240840852260590	0.235997140407562	0.191130995750427	0.186610102653503	0.240257218480110	0.174427449703217	0.191121205687523	0.196420088410378	0.235799595713615	0.182096272706985	0.160821229219437	0.135060682892799
834	0.0111062768846750	0.115295775234699	0.0185041408985853	0.0505708903074265	0.0799768865108490	0.0349552221596241	0.0567516870796680	0.109895989298821	0.200293228030205	0.0468638427555561	0.0646537467837334	0.107935503125191	0.136749669909477	0.212141990661621	0.121855191886425	0.241236791014671	0.236602649092674	0.191460087895393	0.186856701970100	0.240574836730957	0.174736887216568	0.191376805305481	0.196195349097252	0.235965207219124	0.181782439351082	0.160395845770836	0.134630009531975
836	0.0111296921968460	0.115408897399902	0.0185153502970934	0.0506179593503475	0.0799973607063294	0.0349891409277916	0.0568447783589363	0.109911106526852	0.200307741761208	0.0469342656433582	0.0646670982241631	0.107898138463497	0.136798664927483	0.212214246392250	0.122074127197266	0.241288587450981	0.236789375543594	0.191385477781296	0.186847314238548	0.240445643663406	0.174751937389374	0.191325873136520	0.195905849337578	0.236151590943337	0.181708618998528	0.160392388701439	0.134647279977798
838	0.0111887659877539	0.115633338689804	0.0185813885182142	0.0507654100656509	0.0801019370555878	0.0350952185690403	0.0570464469492435	0.110100299119949	0.200414076447487	0.0471169129014015	0.0647627711296082	0.107974901795387	0.136961594223976	0.212491989135742	0.122331209480762	0.241061300039291	0.236684709787369	0.191054627299309	0.186624079942703	0.239869683980942	0.174459725618362	0.191089317202568	0.195411369204521	0.236061289906502	0.181790545582771	0.160478055477142	0.134826779365540
840	0.0112382099032402	0.115837715566158	0.0186425596475601	0.0508584268391132	0.0802367702126503	0.0351724140346050	0.0572116188704968	0.110259480774403	0.200602874159813	0.0472695976495743	0.0648591518402100	0.108095191419125	0.137173384428024	0.212871447205544	0.122414499521256	0.240814357995987	0.236418917775154	0.190858930349350	0.186450645327568	0.239412263035774	0.174204498529434	0.190871551632881	0.195072174072266	0.235820084810257	0.182261630892754	0.160659089684486	0.135022133588791
842	0.0113533539697528	0.116331517696381	0.0187587868422270	0.0510201975703239	0.0805906578898430	0.0353092364966869	0.0574597567319870	0.110558040440083	0.201296359300613	0.0474821664392948	0.0650816485285759	0.108451806008816	0.137696221470833	0.213666275143623	0.122593902051449	0.240414753556252	0.235737204551697	0.190584719181061	0.186060383915901	0.238893061876297	0.174060747027397	0.190394625067711	0.194580763578415	0.235560745000839	0.182937771081924	0.161217525601387	0.135456502437592
844	0.0114492932334542	0.116774149239063	0.0188674330711365	0.0511572770774365	0.0808946192264557	0.0354049429297447	0.0576595067977905	0.110914982855320	0.202005177736282	0.0476136915385723	0.0652467533946037	0.108727201819420	0.138045802712441	0.214176982641220	0.122786007821560	0.240062847733498	0.235127270221710	0.190391629934311	0.185711577534676	0.238510653376579	0.174075081944466	0.190030813217163	0.194202631711960	0.235303908586502	0.183202862739563	0.161658033728600	0.135769993066788
846	0.0113615533336997	0.116774745285511	0.0188139118254185	0.0511000156402588	0.0808282196521759	0.0353035293519497	0.0575615093111992	0.110945932567120	0.202172726392746	0.0475143715739250	0.0652181878685951	0.108648307621479	0.138028368353844	0.214131414890289	0.122936204075813	0.240550100803375	0.235667496919632	0.191016897559166	0.186265483498573	0.239358514547348	0.174665614962578	0.190670743584633	0.194781839847565	0.235172078013420	0.183205664157867	0.161804780364037	0.135797321796417
848	0.0111564528197050	0.116611547768116	0.0186261013150215	0.0509497113525867	0.0805793926119804	0.0351015403866768	0.0572663396596909	0.110806614160538	0.202176287770271	0.0473360307514668	0.0651288181543350	0.108462452888489	0.137931510806084	0.214045882225037	0.123048454523087	0.241905212402344	0.237225756049156	0.192398086190224	0.187661483883858	0.241048410534859	0.175880074501038	0.192131832242012	0.196150973439217	0.235687151551247	0.183182239532471	0.161842420697212	0.135768756270409
850	0.0110728424042463	0.116494409739971	0.0185244213789701	0.0508988350629807	0.0804296880960465	0.0350190922617912	0.0570637248456478	0.110708646476269	0.202103286981583	0.0472654029726982	0.0650340691208839	0.108350649476051	0.137875914573669	0.214025512337685	0.123074397444725	0.242688968777657	0.238161027431488	0.193173721432686	0.188434004783630	0.241894334554672	0.176563292741776	0.192901745438576	0.196927607059479	0.236908450722694	0.183078378438950	0.161800369620323	0.135773330926895
852	0.0110929664224386	0.116323977708817	0.0185181610286236	0.0509363710880280	0.0803109109401703	0.0350168012082577	0.0569479204714298	0.110544726252556	0.201810657978058	0.0472189374268055	0.0648188367486000	0.108225256204605	0.137831166386604	0.213874235749245	0.123086705803871	0.243050336837769	0.238534078001976	0.193573623895645	0.188854783773422	0.242336943745613	0.176957070827484	0.193369284272194	0.197346106171608	0.238072097301483	0.183023184537888	0.161682665348053	0.135762587189674
854	0.0111358696594834	0.116263486444950	0.0185457095503807	0.0510231368243694	0.0803026109933853	0.0350552648305893	0.0569127537310123	0.110403060913086	0.201640456914902	0.0472350455820560	0.0647218972444534	0.108217947185040	0.137950330972672	0.213926360011101	0.123247839510441	0.243416324257851	0.238789454102516	0.193843692541122	0.189165189862251	0.242739766836166	0.177264973521233	0.193777009844780	0.197688207030296	0.238543510437012	0.183534651994705	0.161758974194527	0.135895252227783
856	0.0112496707588434	0.116777293384075	0.0186711829155684	0.0513439215719700	0.0807342082262039	0.0352639853954315	0.0571181029081345	0.110729813575745	0.202295184135437	0.0475418232381344	0.0651197209954262	0.108720242977142	0.138745576143265	0.214946627616882	0.123979508876801	0.243711963295937	0.238977268338203	0.193995803594589	0.189386069774628	0.242973595857620	0.177451074123383	0.194146007299423	0.197987154126167	0.238846123218536	0.184828594326973	0.162609517574310	0.136680096387863
858	0.0114268967881799	0.117653869092464	0.0189089886844158	0.0518448911607266	0.0814198851585388	0.0355823822319508	0.0575427561998367	0.111591964960098	0.203533634543419	0.0479928068816662	0.0657078102231026	0.109549097716808	0.139716461300850	0.216231197118759	0.124860368669033	0.244169995188713	0.239300668239594	0.194214299321175	0.189740166068077	0.243167430162430	0.177735894918442	0.194611832499504	0.198392763733864	0.239203974604607	0.185806810855865	0.163647234439850	0.137648954987526
860	0.0114939920604229	0.118024013936520	0.0190207585692406	0.0520799420773983	0.0816780999302864	0.0357127375900745	0.0577322691679001	0.112069040536881	0.204054579138756	0.0481752455234528	0.0658993124961853	0.109888225793839	0.140037253499031	0.216704115271568	0.125266954302788	0.244500443339348	0.239640578627586	0.194463163614273	0.190117090940475	0.243504643440247	0.178099766373634	0.195051863789558	0.198821201920509	0.239569693803787	0.186118423938751	0.164093837141991	0.138059303164482
862	0.0114949317649007	0.118130207061768	0.0190281514078379	0.0522522442042828	0.0817251428961754	0.0357926562428474	0.0577547475695610	0.112161137163639	0.204128056764603	0.0482726208865643	0.0659727528691292	0.109940834343433	0.140243813395500	0.217002958059311	0.125697240233421	0.245089232921600	0.240597248077393	0.195120543241501	0.191086530685425	0.244676545262337	0.178949162364006	0.196088790893555	0.199929967522621	0.239937156438828	0.186312839388847	0.164506658911705	0.138438478112221
864	0.0114782238379121	0.118167750537395	0.0190120916813612	0.0523470826447010	0.0817305222153664	0.0358271189033985	0.0577634312212467	0.112214207649231	0.204165577888489	0.0483087934553623	0.0660117343068123	0.109945729374886	0.140378758311272	0.217225924134254	0.126025512814522	0.245632693171501	0.241535469889641	0.195686876773834	0.191973999142647	0.245666176080704	0.179633185267448	0.196955665946007	0.200906425714493	0.240330338478088	0.186521455645561	0.164722323417664	0.138674408197403
866	0.0113877272233367	0.118172250688076	0.0189369525760412	0.0523025505244732	0.0817262083292007	0.0357417762279511	0.0577273555099964	0.112217649817467	0.204377755522728	0.0482100024819374	0.0659009516239166	0.110042430460453	0.140515267848969	0.217577069997787	0.126197457313538	0.245763912796974	0.241783544421196	0.195650383830071	0.192247286438942	0.245951563119888	0.179761856794357	0.197313398122787	0.201223358511925	0.240680500864983	0.186842665076256	0.164783686399460	0.138671666383743
868	0.0112592140212655	0.118183739483356	0.0188107844442129	0.0522405318915844	0.0817392766475678	0.0356421694159508	0.0576543137431145	0.112184062600136	0.204721778631210	0.0480908937752247	0.0657671317458153	0.110182940959930	0.140658497810364	0.217984512448311	0.126310393214226	0.245816782116890	0.241839274764061	0.195391058921814	0.192432314157486	0.246173664927483	0.179821819067001	0.197593629360199	0.201438933610916	0.240753576159477	0.187168255448341	0.164818957448006	0.138631150126457
870	0.0112558752298355	0.118329435586929	0.0188161339610815	0.0523157939314842	0.0818816497921944	0.0357427038252354	0.0577448457479477	0.112255521118641	0.204948976635933	0.0482212305068970	0.0659283772110939	0.110372520983219	0.140907853841782	0.218341514468193	0.126539915800095	0.245886579155922	0.241930410265923	0.195383638143539	0.192557856440544	0.246416524052620	0.179916352033615	0.197748631238937	0.201488763093948	0.240784868597984	0.187582254409790	0.164928048849106	0.138709798455238
872	0.0113703431561589	0.118796624243259	0.0190299842506647	0.0526121146976948	0.0822529867291451	0.0360932536423206	0.0581428147852421	0.112730443477631	0.205309510231018	0.0486486926674843	0.0664663463830948	0.110780976712704	0.141376107931137	0.218810811638832	0.126996308565140	0.246233046054840	0.242321908473969	0.195721566677094	0.192723765969276	0.246784895658493	0.180162146687508	0.197994753718376	0.201423108577728	0.240917369723320	0.187842786312103	0.165086135268211	0.138816744089127
874	0.0114392237737775	0.119113363325596	0.0191975161433220	0.0527812503278255	0.0824288055300713	0.0362730957567692	0.0583987757563591	0.113176763057709	0.205583810806274	0.0488525442779064	0.0667482465505600	0.110964089632034	0.141516327857971	0.218943908810616	0.127104595303535	0.246580526232719	0.242642223834991	0.195953682065010	0.192715004086494	0.246879264712334	0.180298373103142	0.198151096701622	0.201313003897667	0.241037264466286	0.187506347894669	0.165028363466263	0.138672664761543
876	0.0113615402951837	0.119047842919827	0.0191212501376867	0.0525944679975510	0.0821803659200668	0.0360381416976452	0.0581279210746288	0.113095551729202	0.205644086003304	0.0485598966479301	0.0664786323904991	0.110610082745552	0.141075074672699	0.218588665127754	0.126742199063301	0.246684610843658	0.242618769407272	0.195839792490006	0.192254677414894	0.246455863118172	0.180032595992088	0.198005601763725	0.200984954833984	0.241006419062614	0.186655312776566	0.164476990699768	0.137843504548073
878	0.0112431859597564	0.118899941444397	0.0189546756446362	0.0523095093667507	0.0818640291690826	0.0357105694711208	0.0576874464750290	0.112769171595573	0.205663517117500	0.0481853932142258	0.0660786107182503	0.110118761658669	0.140608057379723	0.218267068266869	0.126350298523903	0.246690049767494	0.242500394582748	0.195639610290527	0.191666230559349	0.245966702699661	0.179614439606667	0.197782963514328	0.200572565197945	0.240790367126465	0.186059013009071	0.163907885551453	0.137004479765892
880	0.0112050157040358	0.118932731449604	0.0188838243484497	0.0521994754672051	0.0818696841597557	0.0356140397489071	0.0575561076402664	0.112672321498394	0.205772876739502	0.0481189675629139	0.0659273937344551	0.109939888119698	0.140562176704407	0.218416064977646	0.126252546906471	0.246734172105789	0.242585867643356	0.195643156766891	0.191428124904633	0.245759919285774	0.179502964019775	0.197715207934380	0.200448676943779	0.240442767739296	0.185736149549484	0.163581147789955	0.136710152029991
882	0.0111908363178372	0.119148112833500	0.0188433527946472	0.0521314702928066	0.0820736810564995	0.0356016829609871	0.0575492121279240	0.112867169082165	0.206125229597092	0.0481597743928432	0.0658315792679787	0.109844096004963	0.140667170286179	0.218768790364265	0.126225605607033	0.246917083859444	0.242944747209549	0.195869758725166	0.191128402948380	0.245432764291763	0.179552778601646	0.197731927037239	0.200410589575768	0.240318268537521	0.185475125908852	0.163205176591873	0.136488184332848
884	0.0111695313826203	0.119290679693222	0.0188137050718069	0.0520969703793526	0.0821651145815849	0.0355993732810020	0.0575419478118420	0.113073259592056	0.206407234072685	0.0481524206697941	0.0657811835408211	0.109772995114326	0.140723347663879	0.218901857733727	0.126165807247162	0.247076854109764	0.243182957172394	0.196016192436218	0.190903380513191	0.245203092694283	0.179568082094193	0.197736471891403	0.200391590595245	0.240500390529633	0.185288622975349	0.162960246205330	0.136291459202766
886	0.0110972337424755	0.119385510683060	0.0187822151929140	0.0520858429372311	0.0821343436837196	0.0355611741542816	0.0574718713760376	0.113145545125008	0.206592395901680	0.0480603538453579	0.0657365098595619	0.109673194587231	0.140753641724587	0.218845888972282	0.126029565930367	0.247137352824211	0.243272274732590	0.195981889963150	0.190613135695457	0.245126485824585	0.179559975862503	0.197709783911705	0.200324431061745	0.240670561790466	0.185030266642571	0.162669718265533	0.135957613587379
888	0.0110280839726329	0.119511775672436	0.0187589898705483	0.0520835742354393	0.0821290835738182	0.0355262942612171	0.0574045255780220	0.113213010132313	0.206768646836281	0.0479897670447826	0.0657052248716354	0.109617866575718	0.140835404396057	0.218821614980698	0.125978276133537	0.247232809662819	0.243368253111839	0.195971444249153	0.190357640385628	0.245129674673080	0.179601475596428	0.197737023234367	0.200298473238945	0.240715458989143	0.184997916221619	0.162530004978180	0.135726630687714
890	0.0110586667433381	0.119749307632446	0.0187909416854382	0.0521571114659309	0.0822893753647804	0.0356062054634094	0.0574837848544121	0.113351479172707	0.207008391618729	0.0480645410716534	0.0657503828406334	0.109788797795773	0.141178071498871	0.219224169850349	0.126312643289566	0.247617155313492	0.243712142109871	0.196182250976563	0.190681830048561	0.245416879653931	0.179949000477791	0.198051258921623	0.200675800442696	0.240875303745270	0.185458302497864	0.162843734025955	0.135862290859222
892	0.0111631518229842	0.120227545499802	0.0188856553286314	0.0523617938160896	0.0825964286923409	0.0357956290245056	0.0577584654092789	0.113703839480877	0.207553371787071	0.0482534803450108	0.0658685341477394	0.110197193920612	0.141696318984032	0.220089152455330	0.126936972141266	0.248622566461563	0.244628906250000	0.196712866425514	0.191672697663307	0.246050804853439	0.180694088339806	0.198778629302979	0.201555028557777	0.241272926330566	0.186004936695099	0.163361743092537	0.136139973998070
894	0.0112328492105007	0.120498605072498	0.0189608559012413	0.0525305122137070	0.0827629417181015	0.0359141789376736	0.0579347014427185	0.113983266055584	0.207942038774490	0.0483997762203217	0.0659912452101708	0.110447466373444	0.141962721943855	0.220768868923187	0.127340108156204	0.249346449971199	0.245363920927048	0.197143554687500	0.192414790391922	0.246687620878220	0.181187063455582	0.199375867843628	0.202222511172295	0.241868317127228	0.186336800456047	0.163648620247841	0.136311799287796
896	0.0113062355667353	0.120582319796085	0.0190619509667158	0.0527509711682797	0.0828888788819313	0.0360330231487751	0.0579796582460403	0.114142559468746	0.208220064640045	0.0485931150615215	0.0662786215543747	0.110741615295410	0.142298415303230	0.221588715910912	0.127761483192444	0.249949514865875	0.246199443936348	0.197706803679466	0.193054765462875	0.247855663299561	0.181795001029968	0.200167223811150	0.203056201338768	0.242481067776680	0.186677321791649	0.164035245776176	0.136586114764214
898	0.0113715175539255	0.120655544102192	0.0191697366535664	0.0529500283300877	0.0830285325646401	0.0361383892595768	0.0580090694129467	0.114292696118355	0.208484530448914	0.0487554781138897	0.0665297433733940	0.111036077141762	0.142615631222725	0.222183689475060	0.128153875470161	0.250552833080292	0.247001260519028	0.198162406682968	0.193627417087555	0.248820781707764	0.182419478893280	0.200885728001595	0.203789561986923	0.242909565567970	0.187079206109047	0.164357975125313	0.136816844344139
900	0.0114007741212845	0.120903082191944	0.0192299112677574	0.0530678331851959	0.0832324102520943	0.0362092256546021	0.0581385940313339	0.114436656236649	0.208809047937393	0.0488952249288559	0.0666777566075325	0.111396156251431	0.143033713102341	0.222776979207993	0.128778412938118	0.250838637351990	0.247231602668762	0.198327481746674	0.194139286875725	0.249352902173996	0.182824701070786	0.201329514384270	0.204114332795143	0.243287682533264	0.187759682536125	0.164868354797363	0.137117400765419
902	0.0114372102543712	0.121353618800640	0.0192997176200151	0.0532133243978024	0.0835333913564682	0.0362913794815540	0.0584002584218979	0.114784806966782	0.209346503019333	0.0490765981376171	0.0668556541204453	0.111927792429924	0.143573343753815	0.223503008484840	0.129470571875572	0.251098245382309	0.247360318899155	0.198535293340683	0.194939449429512	0.249946430325508	0.183300301432610	0.201811507344246	0.204495027661324	0.243511259555817	0.188313186168671	0.165497049689293	0.137556836009026
904	0.0114450240507722	0.121603839099407	0.0193211715668440	0.0532756336033344	0.0836714357137680	0.0363154858350754	0.0585343837738037	0.115059562027454	0.209714740514755	0.0491325818002224	0.0669354423880577	0.112145699560642	0.143841102719307	0.223939478397369	0.129681870341301	0.251252353191376	0.247507959604263	0.198682889342308	0.195289149880409	0.250152885913849	0.183520689606667	0.202089175581932	0.204794064164162	0.243652835488319	0.188788741827011	0.165856674313545	0.137876093387604
906	0.0114004081115127	0.121854901313782	0.0192653536796570	0.0532841756939888	0.0837533995509148	0.0362909249961376	0.0586198121309280	0.115271024405956	0.210189774632454	0.0491172634065151	0.0669708028435707	0.112263843417168	0.144101411104202	0.224379003047943	0.129764333367348	0.251363784074783	0.247857749462128	0.198913380503654	0.195260897278786	0.250198751688004	0.183726087212563	0.202504381537437	0.205224901437759	0.243843346834183	0.189390480518341	0.166290163993835	0.138333082199097
908	0.0113483509048820	0.122025005519390	0.0192095637321472	0.0532907061278820	0.0837794467806816	0.0362642407417297	0.0586739592254162	0.115455947816372	0.210581585764885	0.0490947179496288	0.0669458881020546	0.112319149076939	0.144239977002144	0.224557831883430	0.129790678620338	0.251424372196198	0.248108372092247	0.199043005704880	0.195161998271942	0.250213921070099	0.183883368968964	0.202735021710396	0.205469459295273	0.243966460227966	0.189668297767639	0.166510641574860	0.138588666915894
910	0.0112707540392876	0.122037045657635	0.0191795602440834	0.0532729774713516	0.0837835595011711	0.0362278781831265	0.0585801005363464	0.115469798445702	0.210716679692268	0.0490223579108715	0.0668327957391739	0.112190522253513	0.144203156232834	0.224409103393555	0.129578486084938	0.251378118991852	0.247815310955048	0.198762252926826	0.194865778088570	0.250032067298889	0.183746367692947	0.202415645122528	0.205052852630615	0.243901848793030	0.189704924821854	0.166439086198807	0.138601526618004
912	0.0111721754074097	0.122057318687439	0.0191324688494205	0.0532362423837185	0.0838046073913574	0.0361902713775635	0.0584343522787094	0.115416526794434	0.210839778184891	0.0489516519010067	0.0667214021086693	0.111992582678795	0.144115537405014	0.224259912967682	0.129331976175308	0.251298666000366	0.247206479310989	0.198337927460670	0.194245755672455	0.249773949384689	0.183460429310799	0.201940804719925	0.204360589385033	0.243698388338089	0.189702630043030	0.166290298104286	0.138567164540291
914	0.0111821629106998	0.122159697115421	0.0191420335322619	0.0532923527061939	0.0838687568902969	0.0362298749387264	0.0584543943405151	0.115448586642742	0.211029604077339	0.0490011498332024	0.0668030902743340	0.111942932009697	0.144212976098061	0.224402517080307	0.129378825426102	0.251349300146103	0.247008353471756	0.198321864008904	0.193906918168068	0.249640151858330	0.183399915695190	0.201802968978882	0.204166352748871	0.243597790598869	0.189812779426575	0.166271626949310	0.138594880700111
916	0.0113163031637669	0.122430436313152	0.0192828010767698	0.0535225570201874	0.0840641111135483	0.0363602079451084	0.0586537979543209	0.115632139146328	0.211516097187996	0.0491448752582073	0.0670679807662964	0.111956112086773	0.144538268446922	0.224727034568787	0.129463702440262	0.251610904932022	0.247260510921478	0.198739916086197	0.193765938282013	0.249674230813980	0.183532029390335	0.201836094260216	0.204154044389725	0.243728145956993	0.189892604947090	0.166334703564644	0.138676404953003
918	0.0114100240170956	0.122617505490780	0.0193952564150095	0.0536714307963848	0.0841663256287575	0.0364390574395657	0.0587685033679009	0.115785442292690	0.211855649948120	0.0492135658860207	0.0671827793121338	0.111925318837166	0.144693151116371	0.224806666374207	0.129352569580078	0.251901090145111	0.247611984610558	0.199085116386414	0.193814456462860	0.249842882156372	0.183663949370384	0.201931789517403	0.204196810722351	0.243945360183716	0.189830273389816	0.166361168026924	0.138738974928856
920	0.0114037254825234	0.122591666877270	0.0193770192563534	0.0536012426018715	0.0841027349233627	0.0364036634564400	0.0586789511144161	0.115767568349838	0.211816221475601	0.0491427071392536	0.0670497044920921	0.111718803644180	0.144573688507080	0.224441587924957	0.128940761089325	0.252353996038437	0.248048946261406	0.199412807822227	0.194188520312309	0.250358521938324	0.184101566672325	0.202312052249908	0.204511210322380	0.244132280349731	0.189736634492874	0.166271403431892	0.138768866658211
922	0.0113723529502749	0.122511334717274	0.0193304009735584	0.0534879378974438	0.0840563625097275	0.0363560207188129	0.0585336871445179	0.115711472928524	0.211669340729713	0.0490595214068890	0.0669231638312340	0.111505329608917	0.144456863403320	0.224139273166657	0.128694951534271	0.252895444631577	0.248478904366493	0.199732348322868	0.194536715745926	0.250851869583130	0.184654831886292	0.202731296420097	0.204902082681656	0.244295313954353	0.189777240157127	0.166188418865204	0.138780504465103
924	0.0113512938842177	0.122576147317886	0.0193192865699530	0.0534927248954773	0.0841518715023994	0.0363777838647366	0.0585204213857651	0.115731500089169	0.211703464388847	0.0491022206842899	0.0669784173369408	0.111568801105022	0.144632324576378	0.224375352263451	0.128898978233337	0.252969115972519	0.248645380139351	0.199791699647903	0.194388493895531	0.250826120376587	0.184754580259323	0.202835693955421	0.204860135912895	0.244385093450546	0.190025672316551	0.166281908750534	0.138921156525612
926	0.0113310292363167	0.122828580439091	0.0193202216178179	0.0535557270050049	0.0843513458967209	0.0364344492554665	0.0586158446967602	0.115843579173088	0.211976885795593	0.0492407456040382	0.0670777708292007	0.111835487186909	0.144975572824478	0.224823042750359	0.129236996173859	0.252744734287262	0.248867034912109	0.199819728732109	0.194003939628601	0.250594586133957	0.184579834342003	0.202954038977623	0.204545274376869	0.244234651327133	0.190286070108414	0.166479185223579	0.139149069786072
928	0.0113361570984125	0.123021163046360	0.0193303916603327	0.0536223724484444	0.0844560265541077	0.0364817120134831	0.0587200522422791	0.115964896976948	0.212220236659050	0.0493390336632729	0.0671231299638748	0.112014785408974	0.145149543881416	0.225094154477119	0.129411980509758	0.252684086561203	0.249081313610077	0.199863791465759	0.193976089358330	0.250426530838013	0.184530153870583	0.203146636486053	0.204514086246490	0.243922695517540	0.190480113029480	0.166629567742348	0.139268457889557
930	0.0113929724320769	0.123228155076504	0.0193808190524578	0.0537679009139538	0.0845159515738487	0.0365842282772064	0.0589045099914074	0.116225257515907	0.212634861469269	0.0494445487856865	0.0672305747866631	0.112179458141327	0.145349755883217	0.225541576743126	0.129656374454498	0.253059148788452	0.249576434493065	0.199987679719925	0.194584980607033	0.250300258398056	0.184792384505272	0.203617617487907	0.204991117119789	0.243803903460503	0.190716326236725	0.166851833462715	0.139460235834122
932	0.0114520620554686	0.123411208391190	0.0194380264729261	0.0539004579186440	0.0845678821206093	0.0366655960679054	0.0590696930885315	0.116543084383011	0.213075295090675	0.0495157018303871	0.0673595592379570	0.112310729920864	0.145493939518929	0.225894659757614	0.129814699292183	0.253487974405289	0.250061988830566	0.200086817145348	0.195201203227043	0.250242620706558	0.185078769922256	0.203969165682793	0.205367147922516	0.244037657976151	0.190743431448936	0.166968792676926	0.139579743146896
934	0.0114876721054316	0.123464375734329	0.0194612927734852	0.0539428815245628	0.0846052989363670	0.0366839095950127	0.0590644478797913	0.116620928049088	0.213151231408119	0.0495025850832462	0.0674399361014366	0.112226597964764	0.145439743995667	0.225900322198868	0.129733607172966	0.253626644611359	0.250133961439133	0.200077041983604	0.195217460393906	0.250163018703461	0.185154646635056	0.203704416751862	0.205173939466476	0.244388058781624	0.190503776073456	0.166832000017166	0.139425948262215
936	0.0115292761474848	0.123534619808197	0.0194841269403696	0.0539447590708733	0.0846461653709412	0.0367066934704781	0.0590220168232918	0.116605222225189	0.213106721639633	0.0494829230010510	0.0674734562635422	0.112002380192280	0.145339891314507	0.225819498300552	0.129633769392967	0.253730654716492	0.250043213367462	0.200051322579384	0.194936409592628	0.249996095895767	0.185170099139214	0.203211218118668	0.204770460724831	0.244636237621307	0.190342903137207	0.166686177253723	0.139201909303665
938	0.0115414559841156	0.123662710189819	0.0195017978549004	0.0539564602077007	0.0847058296203613	0.0367376469075680	0.0590323135256767	0.116621434688568	0.213199004530907	0.0495100617408752	0.0674813017249107	0.111960574984550	0.145448818802834	0.225950926542282	0.129743888974190	0.253891706466675	0.250072896480560	0.200125843286514	0.194815784692764	0.250044047832489	0.185173824429512	0.203214764595032	0.204732626676559	0.244833454489708	0.190492227673531	0.166800051927567	0.139230892062187
940	0.0115140266716480	0.123981088399887	0.0195334143936634	0.0540610961616039	0.0848691835999489	0.0367781445384026	0.0590865947306156	0.116788066923618	0.213751390576363	0.0496058128774166	0.0675313696265221	0.112154781818390	0.145844489336014	0.226351171731949	0.130005687475204	0.254344403743744	0.250451982021332	0.200403064489365	0.195054024457932	0.250295042991638	0.185308873653412	0.203669980168343	0.205013215541840	0.245112940669060	0.190694585442543	0.167128831148148	0.139470934867859
942	0.0114900739863515	0.124233044683933	0.0195685494691134	0.0541527792811394	0.0849993079900742	0.0368021018803120	0.0591300912201405	0.116989180445671	0.214218467473984	0.0496823713183403	0.0675844699144363	0.112299926578999	0.146111950278282	0.226584821939468	0.130123198032379	0.254663139581680	0.250729262828827	0.200581118464470	0.195219874382019	0.250386297702789	0.185386791825295	0.203905194997787	0.205182597041130	0.245489552617073	0.190774321556091	0.167292520403862	0.139639854431152
944	0.0115007534623146	0.124267674982548	0.0196128450334072	0.0541827268898487	0.0850818306207657	0.0368444994091988	0.0591338947415352	0.117090091109276	0.214313507080078	0.0497269742190838	0.0677313506603241	0.112292379140854	0.146140605211258	0.226707175374031	0.130014151334763	0.254325807094574	0.250421911478043	0.200303554534912	0.194910719990730	0.249858662486076	0.184997454285622	0.203415468335152	0.204915583133698	0.245764017105103	0.190904960036278	0.167256936430931	0.139642968773842
946	0.0115238223224878	0.124225415289402	0.0196701493114233	0.0542159341275692	0.0851715058088303	0.0369098410010338	0.0591582655906677	0.117157027125359	0.214369982481003	0.0497596003115177	0.0679107978940010	0.112282447516918	0.146164566278458	0.226888284087181	0.129934713244438	0.253675401210785	0.249951809644699	0.199907392263412	0.194508180022240	0.249322608113289	0.184490785002708	0.202757760882378	0.204549565911293	0.245591893792152	0.191138744354248	0.167252361774445	0.139633208513260
948	0.0115527249872684	0.124282948672771	0.0197031889110804	0.0543092638254166	0.0852584242820740	0.0369762443006039	0.0592618323862553	0.117186233401299	0.214503303170204	0.0498507432639599	0.0679775476455689	0.112391531467438	0.146436974406242	0.227343618869782	0.130124166607857	0.253541558980942	0.250020682811737	0.200035467743874	0.194551914930344	0.249801471829414	0.184574604034424	0.202963247895241	0.204693064093590	0.245285421609879	0.191683068871498	0.167576566338539	0.139970198273659
950	0.0116107584908605	0.124567814171314	0.0197461415082216	0.0545284971594811	0.0854627788066864	0.0370945073664188	0.0594785213470459	0.117358453571796	0.214873626828194	0.0500706061720848	0.0680521130561829	0.112651184201241	0.146977722644806	0.228080898523331	0.130454018712044	0.253909945487976	0.250632107257843	0.200649276375771	0.195025786757469	0.250977098941803	0.185125574469566	0.203883588314056	0.205296561121941	0.245259836316109	0.192246869206429	0.168126598000526	0.140684843063355
952	0.0116180749610066	0.124706149101257	0.0197464600205421	0.0546191483736038	0.0855526104569435	0.0371249020099640	0.0595612451434135	0.117512755095959	0.215097919106483	0.0501498989760876	0.0680620372295380	0.112773805856705	0.147164732217789	0.228318855166435	0.130576968193054	0.254288762807846	0.251194864511490	0.201085522770882	0.195453897118568	0.251482188701630	0.185582280158997	0.204585954546928	0.205868616700172	0.245591655373573	0.192393079400063	0.168352633714676	0.140970572829247
954	0.0114647094160318	0.124479688704014	0.0195935070514679	0.0545111298561096	0.0853519290685654	0.0369499661028385	0.0593466609716415	0.117367975413799	0.214826524257660	0.0499904304742813	0.0679232627153397	0.112643934786320	0.146865278482437	0.228078052401543	0.130495727062225	0.254998773336411	0.251941740512848	0.201484635472298	0.196181014180183	0.251538276672363	0.186297431588173	0.205356732010841	0.206894174218178	0.246132194995880	0.192435055971146	0.168343707919121	0.140948116779327
956	0.0113005684688687	0.124227918684483	0.0194175560027361	0.0544187426567078	0.0851106047630310	0.0367791652679443	0.0591016001999378	0.117106162011623	0.214452266693115	0.0498500317335129	0.0678097680211067	0.112552039325237	0.146648749709129	0.227938637137413	0.130497246980667	0.255834013223648	0.252655714750290	0.201857715845108	0.196929484605789	0.251731693744659	0.186999753117561	0.206080913543701	0.207925200462341	0.246722817420959	0.192807689309120	0.168399110436440	0.141019731760025
958	0.0113439634442329	0.124269582331181	0.0194594338536263	0.0545637272298336	0.0851660296320915	0.0368532612919807	0.0592106394469738	0.117183551192284	0.214592695236206	0.0500106737017632	0.0679997056722641	0.112923242151737	0.147256061434746	0.228484213352203	0.130960270762444	0.256280452013016	0.253147989511490	0.202076792716980	0.197449743747711	0.252394974231720	0.187473237514496	0.206823080778122	0.208662018179894	0.247421190142632	0.193843975663185	0.169017091393471	0.141665935516357
960	0.0115087116137147	0.124485991895199	0.0196573622524738	0.0549130178987980	0.0854327231645584	0.0370723083615303	0.0595621615648270	0.117698147892952	0.215160101652145	0.0503189712762833	0.0683677569031715	0.113618887960911	0.148222237825394	0.229397177696228	0.131695196032524	0.256819128990173	0.253862977027893	0.202293038368225	0.198208242654800	0.253373920917511	0.188107222318649	0.207896262407303	0.209532156586647	0.247936353087425	0.194774419069290	0.169887334108353	0.142620787024498
962	0.0115772066637874	0.124644428491592	0.0197527669370174	0.0551206134259701	0.0856126546859741	0.0371987782418728	0.0597267411649227	0.118033438920975	0.215501457452774	0.0504153594374657	0.0685527995228767	0.113928377628326	0.148698449134827	0.229845568537712	0.132207840681076	0.257037490606308	0.254211992025375	0.202397629618645	0.198722034692764	0.253952324390411	0.188446283340454	0.208428725600243	0.209953084588051	0.248301908373833	0.195373132824898	0.170371875166893	0.143113702535629
964	0.0115580521523952	0.124804116785526	0.0197182390838861	0.0553074441850185	0.0858156159520149	0.0372844226658344	0.0597610548138619	0.118074387311935	0.215642675757408	0.0504143461585045	0.0687000453472138	0.114110119640827	0.149164140224457	0.230214491486549	0.132814869284630	0.257027149200439	0.254129081964493	0.202622786164284	0.199394956231117	0.254788994789124	0.188765764236450	0.208741530776024	0.210377871990204	0.248571529984474	0.195944041013718	0.170951858162880	0.143607378005981
966	0.0115283243358135	0.124911852180958	0.0196737665683031	0.0554305166006088	0.0859350860118866	0.0373087376356125	0.0597891733050346	0.118084475398064	0.215717568993568	0.0504173897206783	0.0687953680753708	0.114254653453827	0.149423480033875	0.230477616190910	0.133306860923767	0.257088541984558	0.254101693630219	0.202874854207039	0.200120165944099	0.255534410476685	0.189121410250664	0.208896189928055	0.210833162069321	0.248701855540276	0.196252509951592	0.171335682272911	0.143914401531219
968	0.0114847132936120	0.124903552234173	0.0196607001125813	0.0554486662149429	0.0858698487281799	0.0372287742793560	0.0598330087959766	0.118054814636707	0.215815231204033	0.0503714345395565	0.0688737481832504	0.114303022623062	0.149640873074532	0.230965077877045	0.134224176406860	0.257676184177399	0.254608720541000	0.203322932124138	0.201712056994438	0.256614893674850	0.189925000071526	0.209043577313423	0.211640626192093	0.248987659811974	0.196453660726547	0.171778097748756	0.144123524427414
970	0.0114273652434349	0.124846816062927	0.0196296442300081	0.0554374940693378	0.0857520774006844	0.0371253825724125	0.0598896816372871	0.117976054549217	0.215949863195419	0.0502995252609253	0.0689425617456436	0.114328488707542	0.149865224957466	0.231420561671257	0.135175496339798	0.258523523807526	0.255261123180389	0.203824892640114	0.203732535243034	0.257678061723709	0.190828353166580	0.209205016493797	0.212559327483177	0.249478116631508	0.196447730064392	0.172141462564468	0.144218862056732
972	0.0113868685439229	0.124776653945446	0.0195695776492357	0.0553775243461132	0.0856732279062271	0.0370502099394798	0.0598349124193192	0.117865711450577	0.215842232108116	0.0502215698361397	0.0689157769083977	0.114262029528618	0.149905055761337	0.231330886483192	0.135517969727516	0.258745402097702	0.255312293767929	0.203849911689758	0.204645425081253	0.257960617542267	0.190985992550850	0.209144517779350	0.212790459394455	0.249921604990959	0.196106806397438	0.172067537903786	0.144042089581490
974	0.0113125415518880	0.124633342027664	0.0194341149181128	0.0551858134567738	0.0855507403612137	0.0369156599044800	0.0596809126436710	0.117568857967854	0.215367972850800	0.0500771552324295	0.0688138082623482	0.114027403295040	0.149842843413353	0.230903238058090	0.135624632239342	0.258683085441589	0.255018383264542	0.203556954860687	0.205346867442131	0.258125126361847	0.190900921821594	0.208825916051865	0.212739527225494	0.250032961368561	0.195716738700867	0.171822160482407	0.143696784973145
976	0.0112731093540788	0.124593526124954	0.0193606708198786	0.0550559200346470	0.0854947194457054	0.0368487052619457	0.0595967955887318	0.117366917431355	0.215099722146988	0.0500008575618267	0.0687733665108681	0.113813966512680	0.149709433317184	0.230562120676041	0.135431215167046	0.258540421724319	0.254751622676849	0.203267410397530	0.205398589372635	0.257800638675690	0.190725445747376	0.208361119031906	0.212421908974648	0.249775618314743	0.195455312728882	0.171621620655060	0.143435716629028
978	0.0112923206761479	0.124831795692444	0.0194144733250141	0.0549520067870617	0.0855611041188240	0.0368772186338902	0.0595780164003372	0.117546364665031	0.215270772576332	0.0500221587717533	0.0688024833798409	0.113580659031868	0.149376213550568	0.230083569884300	0.134727880358696	0.258173465728760	0.254254549741745	0.202815517783165	0.204042464494705	0.256074845790863	0.189911797642708	0.207130089402199	0.211248591542244	0.249280691146851	0.195090875029564	0.171211585402489	0.142996415495873
980	0.0113263074308634	0.125125512480736	0.0194867514073849	0.0548672191798687	0.0856361687183380	0.0369222126901150	0.0595725178718567	0.117864988744259	0.215508386492729	0.0500535331666470	0.0688067600131035	0.113356396555901	0.149012967944145	0.229602962732315	0.133992671966553	0.257714092731476	0.253695756196976	0.202446043491364	0.202443376183510	0.254392266273499	0.189023867249489	0.205988973379135	0.209984213113785	0.248594447970390	0.194554075598717	0.170726999640465	0.142535671591759
982	0.0113800968974829	0.125294700264931	0.0195390786975622	0.0547917336225510	0.0856358185410500	0.0369700677692890	0.0596033930778503	0.117935456335545	0.215554237365723	0.0500195808708668	0.0686643719673157	0.113059349358082	0.148418948054314	0.228988870978355	0.133159130811691	0.257322996854782	0.253400564193726	0.202264830470085	0.201102942228317	0.253081053495407	0.188379153609276	0.205399915575981	0.209037691354752	0.247600391507149	0.193422675132751	0.169780090451241	0.141808614134789
984	0.0114604653790593	0.125505790114403	0.0196286905556917	0.0546255074441433	0.0856088101863861	0.0370162725448608	0.0596625395119190	0.117869406938553	0.215550750494003	0.0499285981059074	0.0684447959065437	0.112585499882698	0.147656485438347	0.228194460272789	0.132167011499405	0.256808936595917	0.253078103065491	0.201986268162727	0.199449822306633	0.251443505287170	0.187571287155151	0.204880014061928	0.207932800054550	0.246722772717476	0.192387297749519	0.168613493442535	0.140930503606796
986	0.0114484764635563	0.125561088323593	0.0196543820202351	0.0544800460338593	0.0855969786643982	0.0369591191411018	0.0596311017870903	0.117807358503342	0.215510159730911	0.0498224608600140	0.0683147534728050	0.112246423959732	0.147207871079445	0.227715179324150	0.131479397416115	0.256352245807648	0.252743363380432	0.201608389616013	0.198223814368248	0.250269114971161	0.186885461211205	0.204351037740707	0.207044899463654	0.245948433876038	0.191696792840958	0.167939633131027	0.140442937612534
988	0.0113075403496623	0.125417798757553	0.0195574648678303	0.0542754419147968	0.0855614170432091	0.0367321074008942	0.0593556612730026	0.117581233382225	0.215358808636665	0.0496181137859821	0.0680913627147675	0.111786991357803	0.146588951349258	0.227243408560753	0.130605563521385	0.255417525768280	0.252031207084656	0.200865492224693	0.196563780307770	0.248722344636917	0.185792088508606	0.203278914093971	0.205739527940750	0.245054349303246	0.191122770309448	0.167226314544678	0.139875248074532
990	0.0112231383100152	0.125344946980476	0.0194915272295475	0.0541668646037579	0.0855551213026047	0.0366124175488949	0.0591516345739365	0.117346428334713	0.215295329689980	0.0495524667203426	0.0679571107029915	0.111535511910915	0.146235018968582	0.227121576666832	0.130197286605835	0.254768282175064	0.251546174287796	0.200397223234177	0.195508301258087	0.247923180460930	0.185102432966232	0.202614888548851	0.204914242029190	0.244224905967712	0.190996482968330	0.166946336627007	0.139589816331863
992	0.0113856177777052	0.125731602311134	0.0196287985891104	0.0543317422270775	0.0857236310839653	0.0368103459477425	0.0593703724443913	0.117468811571598	0.215583652257919	0.0498558916151524	0.0680737495422363	0.111748844385147	0.146340668201447	0.227445080876350	0.130323976278305	0.254773139953613	0.251402795314789	0.200269132852554	0.195348471403122	0.248077705502510	0.184891149401665	0.202624425292015	0.204700186848640	0.243754491209984	0.191089943051338	0.167061880230904	0.139737665653229
994	0.0116181094199419	0.126271888613701	0.0198474358767271	0.0545587539672852	0.0859448015689850	0.0370494462549686	0.0597453564405441	0.117784783244133	0.215955242514610	0.0501841530203819	0.0682449862360954	0.112016327679157	0.146550387144089	0.227761581540108	0.130462750792503	0.254873842000961	0.251358300447464	0.200211733579636	0.195346072316170	0.248375609517097	0.184759885072708	0.202783048152924	0.204651668667793	0.243876487016678	0.191023007035255	0.167148336768150	0.139910325407982
996	0.0116234496235847	0.126332297921181	0.0198778174817562	0.0545073822140694	0.0859403312206268	0.0369696281850338	0.0597261860966682	0.117846921086311	0.215954750776291	0.0500572100281715	0.0681310594081879	0.111926786601543	0.146450981497765	0.227785065770149	0.130214884877205	0.254941761493683	0.251518934965134	0.200226500630379	0.195457667112350	0.248510286211967	0.184707671403885	0.202951669692993	0.204909890890121	0.244199201464653	0.190713867545128	0.166938304901123	0.139813914895058
998	0.0114947808906436	0.126135036349297	0.0197550952434540	0.0542781800031662	0.0857571363449097	0.0366869121789932	0.0593706369400024	0.117586232721806	0.215660214424133	0.0496450662612915	0.0677952691912651	0.111608855426311	0.146181583404541	0.227698057889938	0.129802837967873	0.255104899406433	0.251895219087601	0.200326904654503	0.195779278874397	0.248647063970566	0.184636473655701	0.203203901648521	0.205458536744118	0.244620710611343	0.190528988838196	0.166628897190094	0.139640524983406
1000	0.0114144179970026	0.126038029789925	0.0196709372103214	0.0541693642735481	0.0856456384062767	0.0365615859627724	0.0591829866170883	0.117391608655453	0.215483456850052	0.0494699478149414	0.0676501020789146	0.111440978944302	0.146026313304901	0.227636292576790	0.129707172513008	0.255285501480103	0.252233773469925	0.200453951954842	0.196055397391319	0.248857140541077	0.184719279408455	0.203432396054268	0.205833449959755	0.245160430669785	0.190605983138084	0.166595473885536	0.139616161584854
1002	0.0113627826794982	0.126074686646462	0.0196471251547337	0.0542003512382507	0.0856291055679321	0.0365504696965218	0.0592204928398132	0.117418795824051	0.215438261628151	0.0495331995189190	0.0676685199141502	0.111490048468113	0.145873501896858	0.227673515677452	0.129826590418816	0.255701214075089	0.252889543771744	0.200756549835205	0.196637243032455	0.249544546008110	0.185255810618401	0.204010650515556	0.206474021077156	0.245712116360664	0.190714225172997	0.166671186685562	0.139694362878799
1004	0.0113257737830281	0.126142546534538	0.0196285489946604	0.0542331151664257	0.0856602862477303	0.0365421883761883	0.0592589825391769	0.117469444870949	0.215429693460464	0.0495860129594803	0.0676737427711487	0.111549846827984	0.145757749676704	0.227745041251183	0.129922658205032	0.255967110395432	0.253346115350723	0.200881168246269	0.196937859058380	0.250001013278961	0.185530737042427	0.204310506582260	0.206819593906403	0.246035411953926	0.190662428736687	0.166660860180855	0.139698490500450
1006	0.0113275339826941	0.126255810260773	0.0196178406476975	0.0541824810206890	0.0857189670205116	0.0365437567234039	0.0592611357569695	0.117428049445152	0.215452656149864	0.0495091341435909	0.0675302371382713	0.111442163586617	0.145636379718781	0.227710783481598	0.130012646317482	0.255298227071762	0.252612680196762	0.200225144624710	0.196029677987099	0.249331742525101	0.184769704937935	0.203669294714928	0.206052437424660	0.246010020375252	0.190500348806381	0.166506275534630	0.139593645930290
1008	0.0113421473652124	0.126431092619896	0.0196211729198694	0.0540629923343658	0.0857564806938171	0.0365511812269688	0.0592400692403317	0.117278367280960	0.215511158108711	0.0494161136448383	0.0673533380031586	0.111250437796116	0.145520061254501	0.227577731013298	0.130035072565079	0.254226982593536	0.251385480165482	0.199336692690849	0.194658994674683	0.248284414410591	0.183812394738197	0.202825605869293	0.204911246895790	0.245524376630783	0.190378576517105	0.166344761848450	0.139515385031700
1010	0.0113365650177002	0.126554399728775	0.0196238383650780	0.0539746768772602	0.0857632979750633	0.0365240424871445	0.0591901801526547	0.117176711559296	0.215680554509163	0.0493880920112133	0.0673062354326248	0.111161701381207	0.145394310355186	0.227404981851578	0.129719048738480	0.254090100526810	0.251261264085770	0.199331030249596	0.194272056221962	0.247903421521187	0.183702737092972	0.202641084790230	0.204632043838501	0.244877710938454	0.190184816718102	0.166160210967064	0.139355242252350
1012	0.0112992376089096	0.126755312085152	0.0196117088198662	0.0538522414863110	0.0858411788940430	0.0364629365503788	0.0591148920357227	0.117174908518791	0.216111615300179	0.0493770577013493	0.0672245994210243	0.111058443784714	0.145140141248703	0.227214455604553	0.129074662923813	0.254579126834869	0.251843720674515	0.199884042143822	0.194303616881371	0.247732803225517	0.183776468038559	0.202602118253708	0.204680949449539	0.244704350829124	0.189820766448975	0.165820375084877	0.138903319835663
1014	0.0112746581435204	0.126827046275139	0.0195987988263369	0.0537512414157391	0.0858822688460350	0.0364216119050980	0.0590461827814579	0.117192044854164	0.216285362839699	0.0493549220263958	0.0670892372727394	0.110839225351810	0.144804462790489	0.226806908845902	0.128545597195625	0.254767656326294	0.252033799886704	0.200032994151115	0.194113284349442	0.247413545846939	0.183573320508003	0.202281549572945	0.204460069537163	0.245054021477699	0.189020156860352	0.165434673428535	0.138450875878334
1016	0.0112740918993950	0.126571938395500	0.0195875130593777	0.0535335056483746	0.0857131406664848	0.0363558046519756	0.0587941929697990	0.117000550031662	0.215739682316780	0.0492144636809826	0.0666716322302818	0.110097549855709	0.144012704491615	0.225453227758408	0.127712517976761	0.254174381494522	0.251199930906296	0.199271053075790	0.192897796630859	0.246467918157578	0.182811468839645	0.200966551899910	0.203403770923615	0.245264410972595	0.187868684530258	0.164521351456642	0.137592419981956
1018	0.0112744849175215	0.126314386725426	0.0195839069783688	0.0533384010195732	0.0855499058961868	0.0363014265894890	0.0585002154111862	0.116694696247578	0.215146616101265	0.0490627624094486	0.0663223862648010	0.109403714537621	0.143434941768646	0.224441140890121	0.127119734883308	0.253481924533844	0.250307142734528	0.198545247316360	0.191664740443230	0.245549887418747	0.182155042886734	0.199815139174461	0.202384799718857	0.245010599493980	0.187570005655289	0.163908466696739	0.136974424123764
1020	0.0112840104848146	0.126578301191330	0.0196184292435646	0.0534507669508457	0.0857381373643875	0.0363591164350510	0.0585029982030392	0.116739295423031	0.215487718582153	0.0490588136017323	0.0664213374257088	0.109306119382381	0.143532291054726	0.224674180150032	0.127007752656937	0.253038734197617	0.249872907996178	0.198221474885941	0.191088840365410	0.244745820760727	0.181759804487228	0.199346959590912	0.201656267046928	0.244519948959351	0.188078045845032	0.164106830954552	0.137136876583099
1022	0.0113127436488867	0.127181276679039	0.0196838695555925	0.0537093132734299	0.0861246064305306	0.0364814586937428	0.0586715079843998	0.117182098329067	0.216436102986336	0.0491410754621029	0.0666744560003281	0.109373129904270	0.143789067864418	0.225125148892403	0.126985371112824	0.252480268478394	0.249407172203064	0.197877123951912	0.190605476498604	0.243871614336967	0.181330978870392	0.198919162154198	0.200862154364586	0.244113847613335	0.188446581363678	0.164472237229347	0.137471452355385
1024	0.0113433068618178	0.127397075295448	0.0197228565812111	0.0537944808602333	0.0862362310290337	0.0365233346819878	0.0587671212852001	0.117461293935776	0.216774970293045	0.0491745583713055	0.0667393133044243	0.109368741512299	0.143788278102875	0.225062489509583	0.126871496438980	0.252195298671722	0.249230310320854	0.197751566767693	0.190328076481819	0.243493795394897	0.181256085634232	0.198704868555069	0.200576603412628	0.243939071893692	0.188287213444710	0.164504140615463	0.137480929493904
1026	0.0114034358412027	0.127370059490204	0.0197811033576727	0.0537425912916660	0.0861472859978676	0.0365019068121910	0.0588342286646366	0.117466159164906	0.216533347964287	0.0491492189466953	0.0666522085666657	0.109230130910873	0.143551930785179	0.224693506956100	0.126575604081154	0.251951843500137	0.249183416366577	0.197699606418610	0.189910456538200	0.243355795741081	0.181364879012108	0.198479890823364	0.200534582138062	0.243909895420074	0.188067734241486	0.164339885115623	0.137396931648254
1028	0.0114366644993424	0.127328276634216	0.0198196563869715	0.0536840073764324	0.0860792845487595	0.0364723131060600	0.0588556528091431	0.117410950362682	0.216287672519684	0.0491171851754189	0.0665510073304176	0.109122604131699	0.143414840102196	0.224489688873291	0.126395851373672	0.251803249120712	0.249142125248909	0.197636693716049	0.189680516719818	0.243288040161133	0.181404933333397	0.198364406824112	0.200519263744354	0.243810951709747	0.188100934028626	0.164229407906532	0.137362062931061
1030	0.0113944876939058	0.127266362309456	0.0197498071938753	0.0536239519715309	0.0860296636819840	0.0364331416785717	0.0587655715644360	0.117318160831928	0.216211467981339	0.0490933321416378	0.0663863047957420	0.108944557607174	0.143385946750641	0.224386915564537	0.126316502690315	0.251791149377823	0.248953059315681	0.197405323386192	0.189548283815384	0.243224218487740	0.181267067790031	0.198273181915283	0.200322002172470	0.243504822254181	0.188250333070755	0.164132311940193	0.137388259172440
1032	0.0113345235586166	0.127202138304710	0.0196399893611670	0.0535683892667294	0.0859723016619682	0.0363924279808998	0.0586471222341061	0.117152966558933	0.216194927692413	0.0490459576249123	0.0662472546100617	0.108702301979065	0.143371969461441	0.224335074424744	0.126276507973671	0.251805156469345	0.248707428574562	0.197210296988487	0.189384952187538	0.243162542581558	0.181129232048988	0.198180094361305	0.200119361281395	0.243184655904770	0.188292145729065	0.164075016975403	0.137441515922546
1034	0.0113192331045866	0.127164050936699	0.0196292642503977	0.0535849966108799	0.0859496369957924	0.0363738164305687	0.0585935562849045	0.117128841578960	0.216220274567604	0.0490197017788887	0.0662399083375931	0.108596906065941	0.143385797739029	0.224420219659805	0.126252412796021	0.251626849174500	0.248459458351135	0.197242692112923	0.189162418246269	0.242962643504143	0.181066006422043	0.197982534766197	0.199887603521347	0.243007794022560	0.188247799873352	0.164081782102585	0.137350082397461
1036	0.0113174840807915	0.127090841531754	0.0196807086467743	0.0536551773548126	0.0859566479921341	0.0363511554896832	0.0585285760462284	0.117208458483219	0.216227322816849	0.0490081459283829	0.0662681683897972	0.108540512621403	0.143419280648232	0.224577948451042	0.126170843839645	0.251273185014725	0.248171582818031	0.197306483983994	0.188836693763733	0.242610290646553	0.181004971265793	0.197696924209595	0.199510186910629	0.242952153086662	0.188159480690956	0.164029419422150	0.137189224362373
1038	0.0113294953480363	0.127019718289375	0.0197078213095665	0.0536833703517914	0.0859468206763268	0.0363353714346886	0.0584652014076710	0.117238916456699	0.216199383139610	0.0490131117403507	0.0662445500493050	0.108511358499527	0.143419668078423	0.224542513489723	0.126020371913910	0.251125216484070	0.248044058680534	0.197165802121162	0.188616499304771	0.242313951253891	0.180921271443367	0.197564885020256	0.199240118265152	0.242737844586372	0.187841549515724	0.163806989789009	0.137074336409569
1040	0.0113795539364219	0.126877337694168	0.0197160094976425	0.0536867715418339	0.0858683511614800	0.0363223515450954	0.0583761259913445	0.117060542106628	0.216130256652832	0.0490392968058586	0.0661498308181763	0.108333975076675	0.143373653292656	0.224178582429886	0.125725865364075	0.250943303108215	0.247886478900909	0.196691498160362	0.188159525394440	0.241916537284851	0.180655702948570	0.197491675615311	0.198898702859879	0.242377683520317	0.187335222959518	0.163383901119232	0.136827826499939
1042	0.0114119881764054	0.126767382025719	0.0197102725505829	0.0536564886569977	0.0857992321252823	0.0363070815801621	0.0583053082227707	0.116851896047592	0.216047227382660	0.0490480214357376	0.0660469606518745	0.108101166784763	0.143262162804604	0.223823562264442	0.125536248087883	0.250680834054947	0.247706770896912	0.196366414427757	0.187829628586769	0.241715759038925	0.180442154407501	0.197508379817009	0.198621794581413	0.242091074585915	0.186979547142982	0.163127422332764	0.136634945869446
1044	0.0113626895472407	0.126701638102531	0.0196515284478664	0.0534624345600605	0.0856479853391647	0.0362385213375092	0.0581896752119064	0.116718336939812	0.215812668204308	0.0489368662238121	0.0658048838376999	0.107809774577618	0.142855063080788	0.223453730344772	0.125351637601852	0.250278800725937	0.247412055730820	0.196066096425056	0.187677472829819	0.241580888628960	0.180312603712082	0.197526589035988	0.198209002614021	0.241828024387360	0.186676159501076	0.162851631641388	0.136402726173401
1046	0.0112833725288510	0.126638069748878	0.0195695310831070	0.0532109066843987	0.0854551494121552	0.0361327230930328	0.0580037906765938	0.116514287889004	0.215473175048828	0.0487918891012669	0.0655457079410553	0.107520096004009	0.142452254891396	0.223185926675797	0.125219807028770	0.249924346804619	0.247091531753540	0.195750698447227	0.187442734837532	0.241283461451530	0.180162623524666	0.197423055768013	0.197769239544868	0.241545483469963	0.186529293656349	0.162588283419609	0.136101126670837
1048	0.0112059200182557	0.126535817980766	0.0195161364972591	0.0530923306941986	0.0853366777300835	0.0360203161835671	0.0578863769769669	0.116391815245152	0.215331971645355	0.0487232841551304	0.0654757991433144	0.107356831431389	0.142314240336418	0.223115235567093	0.125016927719116	0.249681085348129	0.246808752417564	0.195442661643028	0.187009572982788	0.240615725517273	0.179824158549309	0.197113499045372	0.197410196065903	0.241127252578735	0.186403512954712	0.162356391549110	0.135743185877800
1050	0.0110753132030368	0.126331955194473	0.0194304902106524	0.0529773049056530	0.0851790159940720	0.0358452312648296	0.0577384158968926	0.116214394569397	0.215170323848724	0.0486539825797081	0.0654453635215759	0.107167422771454	0.142264813184738	0.223079934716225	0.124669477343559	0.249152988195419	0.246309697628021	0.195024907588959	0.186342597007751	0.239766165614128	0.179333359003067	0.196643501520157	0.196997433900833	0.240705102682114	0.186253905296326	0.162107974290848	0.135221853852272
1052	0.0110214538872242	0.126214161515236	0.0193794742226601	0.0529424101114273	0.0850938931107521	0.0357682146131992	0.0576721839606762	0.116090625524521	0.215072944760323	0.0486385188996792	0.0654136836528778	0.107064612209797	0.142264634370804	0.223055526614189	0.124520607292652	0.248631000518799	0.245837986469269	0.194665014743805	0.185818821191788	0.239221423864365	0.179008945822716	0.196257606148720	0.196688205003738	0.240292847156525	0.186081618070602	0.161995545029640	0.135033324360847
1054	0.0110445469617844	0.126122877001762	0.0193667877465487	0.0529467947781086	0.0850174948573113	0.0357746444642544	0.0576409846544266	0.116090156137943	0.215072691440582	0.0486595928668976	0.0653428658843041	0.106956541538239	0.142231643199921	0.222974568605423	0.124501660466194	0.247763648629189	0.245051622390747	0.193997293710709	0.184869915246964	0.238507539033890	0.178381070494652	0.195613622665405	0.196150854229927	0.239781677722931	0.185906291007996	0.161895737051964	0.135039329528809
1056	0.0110883507877588	0.126039832830429	0.0193687174469233	0.0529510416090488	0.0849678143858910	0.0358057096600533	0.0575975328683853	0.116083092987537	0.215062186121941	0.0486732274293900	0.0652947127819061	0.106856472790241	0.142155364155769	0.222804173827171	0.124502621591091	0.247155278921127	0.244510531425476	0.193514287471771	0.184214547276497	0.238008528947830	0.177943080663681	0.195206940174103	0.195739239454269	0.239171028137207	0.185729488730431	0.161809831857681	0.135052308440208
1058	0.0111971544101834	0.125877454876900	0.0194354951381683	0.0529840551316738	0.0848938971757889	0.0358552038669586	0.0575687736272812	0.115985468029976	0.214749157428741	0.0486279167234898	0.0652956366539002	0.106727823615074	0.141944184899330	0.222493767738342	0.124439254403114	0.246747747063637	0.244051918387413	0.193051934242249	0.183936223387718	0.237365514039993	0.177667841315269	0.194904133677483	0.195277273654938	0.238478928804398	0.185398936271667	0.161495685577393	0.134859651327133
1060	0.0113211227580905	0.125659197568893	0.0195377729833126	0.0530132092535496	0.0847578570246697	0.0358879268169403	0.0575121790170670	0.115810997784138	0.214237093925476	0.0485360212624073	0.0652761757373810	0.106545396149158	0.141662701964378	0.222147345542908	0.124313272535801	0.246307417750359	0.243533849716187	0.192586168646812	0.183736979961395	0.236821725964546	0.177453309297562	0.194591462612152	0.194807574152946	0.237975940108299	0.185015082359314	0.161139011383057	0.134594485163689
1062	0.0112520791590214	0.125440910458565	0.0195070765912533	0.0529010444879532	0.0845476686954498	0.0357755310833454	0.0573699399828911	0.115575857460499	0.213875129818916	0.0483561865985394	0.0651001110672951	0.106299459934235	0.141310960054398	0.221642166376114	0.123950123786926	0.245859548449516	0.243078485131264	0.192297980189323	0.183508306741714	0.236657500267029	0.177255243062973	0.194287091493607	0.194580778479576	0.237439155578613	0.184508666396141	0.160724624991417	0.134155765175819
1064	0.0110148945823312	0.124985508620739	0.0193212982267141	0.0526082403957844	0.0841690748929977	0.0355167984962463	0.0570330023765564	0.114959985017776	0.213288173079491	0.0480183586478233	0.0647619292140007	0.105835951864719	0.140811324119568	0.220914453268051	0.123397842049599	0.245063737034798	0.242495194077492	0.192015454173088	0.183167293667793	0.236511141061783	0.176997348666191	0.193944916129112	0.194378912448883	0.236988529562950	0.184073656797409	0.160174086689949	0.133489146828651
1066	0.0108932629227638	0.124709665775299	0.0192097667604685	0.0524547100067139	0.0839914530515671	0.0353769287467003	0.0568254068493843	0.114525325596333	0.212942346930504	0.0478321202099323	0.0645690634846687	0.105562493205071	0.140591666102409	0.220594614744186	0.123135760426521	0.244690150022507	0.242241337895393	0.191890820860863	0.182933479547501	0.236372679471970	0.176919475197792	0.193837672472000	0.194263145327568	0.236543923616409	0.183645755052567	0.159914329648018	0.133257731795311
1068	0.0108784018084407	0.124539829790592	0.0191968213766813	0.0524115748703480	0.0839059129357338	0.0352848209440708	0.0567194633185864	0.114410251379013	0.212753370404243	0.0476922802627087	0.0644269362092018	0.105410702526569	0.140394061803818	0.220272600650787	0.122910015285015	0.244592800736427	0.242170840501785	0.191781789064407	0.182728648185730	0.236263722181320	0.176882356405258	0.193749517202377	0.194108441472054	0.236206382513046	0.183165073394775	0.159650191664696	0.133202120661736
1070	0.0108886016532779	0.124414831399918	0.0192077066749334	0.0523986443877220	0.0838404521346092	0.0352485254406929	0.0566577762365341	0.114348985254765	0.212577685713768	0.0476042218506336	0.0643699392676354	0.105279035866261	0.140282243490219	0.220045581459999	0.122860617935658	0.244539499282837	0.242089837789536	0.191681802272797	0.182598799467087	0.236150890588760	0.176790013909340	0.193654596805573	0.193948626518250	0.236016243696213	0.182981163263321	0.159474372863770	0.133166745305061
1072	0.0109114646911621	0.124348379671574	0.0192223545163870	0.0524281188845634	0.0838012099266052	0.0352823510766029	0.0566340535879135	0.114262513816357	0.212286517024040	0.0475919134914875	0.0643558055162430	0.105041332542896	0.140350833535194	0.219737783074379	0.122947596013546	0.244179174304008	0.241676881909370	0.191208839416504	0.182246670126915	0.235725238919258	0.176421388983727	0.193347185850143	0.193640932440758	0.235698461532593	0.182918310165405	0.159270510077477	0.133037686347961
1074	0.0109306126832962	0.124317876994610	0.0192331057041883	0.0524734929203987	0.0837422236800194	0.0353083200752735	0.0566021054983139	0.114098578691483	0.211913764476776	0.0475813671946526	0.0643039867281914	0.104829534888268	0.140439882874489	0.219378665089607	0.122921638190746	0.243695005774498	0.241219982504845	0.190659359097481	0.181827500462532	0.235113948583603	0.176003739237785	0.192997038364410	0.193339645862579	0.235255271196365	0.182842373847961	0.159101590514183	0.132885634899139
1076	0.0109281996265054	0.124286122620106	0.0192144419997931	0.0524824559688568	0.0836405083537102	0.0352672301232815	0.0565600991249085	0.113979242742062	0.211732774972916	0.0475384928286076	0.0642217472195625	0.104772813618183	0.140365809202194	0.219244062900543	0.122773572802544	0.243295192718506	0.240946739912033	0.190244823694229	0.181535556912422	0.234341830015183	0.175703927874565	0.192729473114014	0.193189814686775	0.234746053814888	0.182705804705620	0.159002721309662	0.132796853780746
1078	0.0109241018071771	0.124168366193771	0.0191616062074900	0.0524950735270977	0.0834902226924896	0.0351812765002251	0.0564768910408020	0.113828592002392	0.211520150303841	0.0474830642342567	0.0640857368707657	0.104692265391350	0.140169039368629	0.219130322337151	0.122615091502666	0.242755100131035	0.240593284368515	0.189779669046402	0.181197687983513	0.233547598123550	0.175407022237778	0.192465350031853	0.192990377545357	0.234373718500137	0.182559132575989	0.158847406506538	0.132672488689423
1080	0.0109005104750395	0.124016813933849	0.0191067364066839	0.0524513833224773	0.0834031701087952	0.0351026840507984	0.0563938096165657	0.113708265125752	0.211337462067604	0.0473900772631168	0.0639772564172745	0.104504726827145	0.139959692955017	0.218869701027870	0.122464925050735	0.242508009076118	0.240420758724213	0.189709752798080	0.181042566895485	0.233344510197639	0.175282746553421	0.192382305860519	0.192857399582863	0.234089389443398	0.182306453585625	0.158627539873123	0.132514193654060
1082	0.0107902120798826	0.123706914484501	0.0189811643213034	0.0522387549281120	0.0832392871379852	0.0349010117352009	0.0562054105103016	0.113463833928108	0.210934966802597	0.0470874644815922	0.0637551844120026	0.104032360017300	0.139587908983231	0.218276605010033	0.122005790472031	0.242313534021378	0.240281537175179	0.189775839447975	0.180903479456902	0.233413696289063	0.175158277153969	0.192216858267784	0.192745953798294	0.233896195888519	0.181967139244080	0.158215314149857	0.132209688425064
1084	0.0106936544179916	0.123468987643719	0.0188592560589314	0.0520529597997665	0.0830544531345367	0.0347574353218079	0.0560463145375252	0.113172776997089	0.210550844669342	0.0468591563403606	0.0635863989591599	0.103665597736835	0.139333352446556	0.217899337410927	0.121689364314079	0.242193892598152	0.240213200449944	0.189765229821205	0.180878683924675	0.233509346842766	0.175111398100853	0.192183911800385	0.192747563123703	0.233899503946304	0.181774258613586	0.157986342906952	0.132049962878227
1086	0.0106318667531013	0.123343110084534	0.0187997166067362	0.0519075766205788	0.0828471928834915	0.0347385145723820	0.0559656620025635	0.113061912357807	0.210214495658875	0.0467955693602562	0.0634311586618424	0.103483475744724	0.139061853289604	0.217716574668884	0.121548943221569	0.242232099175453	0.240425691008568	0.189682006835938	0.180982783436775	0.233537152409554	0.175236940383911	0.192506268620491	0.192880704998970	0.234061270952225	0.181646004319191	0.157863795757294	0.131887063384056
1088	0.0105722965672612	0.123202800750732	0.0187511425465345	0.0517629757523537	0.0826527401804924	0.0347317680716515	0.0558903999626637	0.112961985170841	0.209826439619064	0.0467520318925381	0.0632910951972008	0.103344023227692	0.138801768422127	0.217580407857895	0.121465638279915	0.242318987846375	0.240673616528511	0.189640477299690	0.181051865220070	0.233412101864815	0.175388514995575	0.192791447043419	0.192980855703354	0.234231784939766	0.181658312678337	0.157799735665321	0.131728753447533
1090	0.0105824032798409	0.123164810240269	0.0187715105712414	0.0518036149442196	0.0826229825615883	0.0347279384732246	0.0559008270502090	0.112914033234119	0.209802359342575	0.0467522777616978	0.0633077844977379	0.103341691195965	0.138781636953354	0.217570424079895	0.121396258473396	0.242397159337997	0.240616545081139	0.189545899629593	0.181047037243843	0.233239173889160	0.175379484891891	0.192809909582138	0.193172261118889	0.234331816434860	0.181884378194809	0.157993018627167	0.131896853446960
1092	0.0106358407065272	0.123192228376865	0.0188460350036621	0.0519735552370548	0.0826713666319847	0.0347436107695103	0.0559533163905144	0.112949758768082	0.209945663809776	0.0467684492468834	0.0634006038308144	0.103316642343998	0.138875320553780	0.217712864279747	0.121392115950584	0.242481410503387	0.240484133362770	0.189346984028816	0.181136459112167	0.233166530728340	0.175301149487495	0.192834392189980	0.193483367562294	0.234340146183968	0.182194352149963	0.158317312598228	0.132236793637276
1094	0.0106620201840997	0.123243786394596	0.0188785232603550	0.0520668849349022	0.0827353522181511	0.0347730852663517	0.0559966564178467	0.112986348569393	0.210027694702148	0.0467694364488125	0.0634925961494446	0.103306971490383	0.139007717370987	0.217946752905846	0.121557533740997	0.242679119110107	0.240790590643883	0.189459487795830	0.181488975882530	0.233481571078300	0.175489619374275	0.193182259798050	0.193881988525391	0.234394595026970	0.182629376649857	0.158449724316597	0.132444337010384
1096	0.0106724752113223	0.123334974050522	0.0188473723828793	0.0521298944950104	0.0828401371836662	0.0348210148513317	0.0560372062027454	0.113037899136543	0.210216268897057	0.0467803403735161	0.0636671558022499	0.103471294045448	0.139319270849228	0.218331828713417	0.121826127171516	0.243217200040817	0.241643473505974	0.190029427409172	0.182213351130486	0.234207898378372	0.176142558455467	0.194026216864586	0.194772332906723	0.234673529863358	0.183081686496735	0.158539220690727	0.132707580924034
1098	0.0106770936399698	0.123374573886395	0.0188093148171902	0.0521667264401913	0.0828842520713806	0.0348456501960754	0.0560509413480759	0.113084256649017	0.210338756442070	0.0468099787831306	0.0637600198388100	0.103652201592922	0.139516606926918	0.218564823269844	0.121955350041389	0.243506684899330	0.242091789841652	0.190294742584229	0.182624831795692	0.234581679105759	0.176469102501869	0.194494098424912	0.195390909910202	0.235079571604729	0.183260053396225	0.158673554658890	0.132876932621002
1100	0.0106575936079025	0.123286135494709	0.0188029315322638	0.0521631576120853	0.0827723070979118	0.0348261073231697	0.0560486130416393	0.113021805882454	0.210115671157837	0.0467708818614483	0.0636962652206421	0.103763230144978	0.139604642987251	0.218808710575104	0.122229270637035	0.243392005562782	0.242145895957947	0.189992308616638	0.182957336306572	0.234631985425949	0.176450222730637	0.194726854562759	0.195971876382828	0.235360249876976	0.183461159467697	0.159030243754387	0.133041501045227
1102	0.0106269167736173	0.123183511197567	0.0188085529953241	0.0521625839173794	0.0826413929462433	0.0347945317625999	0.0560526996850967	0.112904518842697	0.209844887256622	0.0467054806649685	0.0636184066534042	0.103839047253132	0.139677867293358	0.219110131263733	0.122584491968155	0.243250921368599	0.242112547159195	0.189705759286881	0.183306589722633	0.234732061624527	0.176462009549141	0.194892421364784	0.196434885263443	0.235392734408379	0.183903813362122	0.159370228648186	0.133213058114052
1104	0.0105956215411425	0.123220361769199	0.0188042335212231	0.0522556751966476	0.0826531574130058	0.0347854569554329	0.0561106652021408	0.112922064960003	0.209967270493507	0.0467614457011223	0.0636851564049721	0.104029849171638	0.139936104416847	0.219711035490036	0.123136587440968	0.243386760354042	0.242250382900238	0.189787015318871	0.183924600481987	0.235272213816643	0.176800236105919	0.195232629776001	0.196963101625443	0.235379546880722	0.184718072414398	0.159932404756546	0.133517831563950
1106	0.0105450190603733	0.123315714299679	0.0187780391424894	0.0524307601153851	0.0827558711171150	0.0347664244472981	0.0562220625579357	0.113070353865623	0.210281684994698	0.0468837246298790	0.0638151466846466	0.104329623281956	0.140332996845245	0.220420166850090	0.123797170817852	0.243668824434280	0.242545530200005	0.189982905983925	0.184798389673233	0.236041665077209	0.177269324660301	0.195767819881439	0.197628721594810	0.235442399978638	0.185222461819649	0.160581707954407	0.133898794651032
1108	0.0105357589200139	0.123291186988354	0.0187576506286860	0.0524659790098667	0.0827747806906700	0.0347521081566811	0.0562915615737438	0.113110072910786	0.210307195782661	0.0469063818454742	0.0638145580887795	0.104389868676662	0.140479981899261	0.220402806997299	0.124006018042564	0.243905678391457	0.242840021848679	0.190257012844086	0.185440376400948	0.236628502607346	0.177636727690697	0.196318373084068	0.198159009218216	0.235688403248787	0.185339316725731	0.160735353827477	0.134014904499054
1110	0.0105647761374712	0.123140610754490	0.0187432467937469	0.0523728616535664	0.0826781243085861	0.0347364656627178	0.0563421174883843	0.112880021333694	0.210028380155563	0.0468515977263451	0.0637245848774910	0.104299217462540	0.140556514263153	0.220063567161560	0.124146938323975	0.244385510683060	0.243410915136337	0.190679073333740	0.186345100402832	0.237271398305893	0.178150996565819	0.197026565670967	0.198906704783440	0.236018732190132	0.185484960675240	0.160727143287659	0.134094700217247
1112	0.0105958348140121	0.123042903840542	0.0187570936977863	0.0523432083427906	0.0825886577367783	0.0347440689802170	0.0563858933746815	0.112651392817497	0.209845781326294	0.0468056201934814	0.0637000650167465	0.104275912046433	0.140586867928505	0.219973444938660	0.124287977814674	0.244687616825104	0.243811279535294	0.190820127725601	0.186758548021317	0.237597748637199	0.178420811891556	0.197365209460258	0.199276685714722	0.236308485269547	0.185592353343964	0.160709187388420	0.134147271513939
1114	0.0106992665678263	0.123037882149220	0.0188701115548611	0.0525062456727028	0.0825801119208336	0.0348363704979420	0.0564102791249752	0.112701445817947	0.209743365645409	0.0468660555779934	0.0637298896908760	0.104324482381344	0.140672579407692	0.220169216394424	0.124522440135479	0.244946867227554	0.244312509894371	0.190833717584610	0.186770156025887	0.237993553280830	0.178704902529717	0.197643414139748	0.199436321854591	0.236575692892075	0.185656040906906	0.160658955574036	0.134185403585434
1116	0.0108103500679135	0.123076923191547	0.0189933516085148	0.0526471212506294	0.0826007202267647	0.0349225364625454	0.0563918873667717	0.112840995192528	0.209618806838989	0.0469509921967983	0.0637372657656670	0.104346498847008	0.140702918171883	0.220299333333969	0.124624505639076	0.245170816779137	0.244625955820084	0.190914675593376	0.186732083559036	0.238220304250717	0.178940862417221	0.197800293564796	0.199480861425400	0.236711964011192	0.185608878731728	0.160594269633293	0.134157985448837
1118	0.0107650002464652	0.123121090233326	0.0189708322286606	0.0525446198880672	0.0825947001576424	0.0348726920783520	0.0563607364892960	0.112849086523056	0.209551781415939	0.0469445101916790	0.0636618584394455	0.104262821376324	0.140530556440353	0.220390304923058	0.124461717903614	0.245538428425789	0.244744852185249	0.191178128123283	0.187046036124229	0.238287419080734	0.179185464978218	0.197906121611595	0.199385553598404	0.236846759915352	0.185401290655136	0.160455822944641	0.134029760956764
1120	0.0106284525245428	0.123171575367451	0.0188733376562595	0.0523670203983784	0.0825850069522858	0.0347605347633362	0.0563397854566574	0.112803339958191	0.209519967436790	0.0469157807528973	0.0635410547256470	0.104115650057793	0.140280306339264	0.220485776662827	0.124271333217621	0.245944783091545	0.244881048798561	0.191451698541641	0.187467932701111	0.238283559679985	0.179377287626266	0.197989970445633	0.199237585067749	0.237023591995239	0.185175552964211	0.160306826233864	0.133909299969673
1122	0.0105705438181758	0.123226314783096	0.0188378896564245	0.0522971227765083	0.0826001167297363	0.0346927344799042	0.0563815049827099	0.112771630287170	0.209564447402954	0.0468824394047260	0.0634947344660759	0.104006506502628	0.140152752399445	0.220320165157318	0.124146282672882	0.245874330401421	0.244940221309662	0.191518113017082	0.187306985259056	0.238146826624870	0.179195404052734	0.197897762060165	0.198903501033783	0.237133219838142	0.184854626655579	0.160076498985291	0.133747547864914
1124	0.0105536393821239	0.123346209526062	0.0188347473740578	0.0522072874009609	0.0826411098241806	0.0346256196498871	0.0563995987176895	0.112700544297695	0.209775462746620	0.0467941127717495	0.0634632557630539	0.103849746286869	0.140014812350273	0.219926774501801	0.123994275927544	0.245593383908272	0.244945824146271	0.191515818238258	0.186722993850708	0.237935587763786	0.178795054554939	0.197587132453918	0.198362499475479	0.237110108137131	0.184543982148170	0.159663096070290	0.133426010608673
1126	0.0105518605560064	0.123444326221943	0.0188349150121212	0.0521490685641766	0.0826652795076370	0.0346192046999931	0.0563990399241447	0.112665995955467	0.209956318140030	0.0467661246657372	0.0634298026561737	0.103800185024738	0.139973908662796	0.219777464866638	0.123863093554974	0.245565235614777	0.244910597801209	0.191521227359772	0.186328291893005	0.237681120634079	0.178629204630852	0.197314485907555	0.198069512844086	0.236955702304840	0.184488803148270	0.159474655985832	0.133208662271500
1128	0.0105669461190701	0.123653210699558	0.0188448689877987	0.0521450042724609	0.0826727002859116	0.0346915535628796	0.0564498640596867	0.112860366702080	0.210248962044716	0.0468649789690971	0.0633343756198883	0.103813149034977	0.140004843473434	0.219932869076729	0.123553901910782	0.245731621980667	0.244920834898949	0.191519722342491	0.185937196016312	0.237231403589249	0.178474381566048	0.197129666805267	0.197792783379555	0.236781507730484	0.184443190693855	0.159339308738709	0.133062824606895
1130	0.0105793131515384	0.123871780931950	0.0188581980764866	0.0521631352603436	0.0827103182673454	0.0347473099827766	0.0564847178757191	0.113150469958782	0.210487961769104	0.0469534173607826	0.0632985830307007	0.103788740932941	0.140060365200043	0.220102727413178	0.123315997421741	0.245887428522110	0.245044752955437	0.191500410437584	0.185691446065903	0.236978247761726	0.178358137607574	0.197178483009338	0.197710081934929	0.236842513084412	0.184390485286713	0.159282222390175	0.133062407374382
1132	0.0105656497180462	0.123942337930202	0.0188695807009935	0.0522116720676422	0.0828875824809074	0.0347715653479099	0.0563532970845699	0.113246977329254	0.210467964410782	0.0470247343182564	0.0633715391159058	0.103779621422291	0.140072360634804	0.220162883400917	0.123269684612751	0.246236145496368	0.245413810014725	0.191573500633240	0.185573220252991	0.236682862043381	0.178325712680817	0.197439715266228	0.197849124670029	0.237124338746071	0.184416264295578	0.159372240304947	0.133277744054794
1134	0.0105516081675887	0.123956270515919	0.0188827794045210	0.0522840805351734	0.0831069350242615	0.0347949638962746	0.0561662986874580	0.113242901861668	0.210401460528374	0.0471198745071888	0.0634580552577972	0.103832267224789	0.140095278620720	0.220294088125229	0.123336210846901	0.246591120958328	0.245793879032135	0.191700026392937	0.185537204146385	0.236570075154305	0.178348869085312	0.197643697261810	0.197968065738678	0.237430796027184	0.184646070003510	0.159508451819420	0.133536517620087
1136	0.0106009207665920	0.124089144170284	0.0189210139214993	0.0523947104811668	0.0832197219133377	0.0348598100244999	0.0561342909932137	0.113252282142639	0.210574865341187	0.0472561158239841	0.0635639280080795	0.104031391441822	0.140386685729027	0.220822721719742	0.123632922768593	0.246565029025078	0.246022045612335	0.191725730895996	0.185672000050545	0.236995384097099	0.178403839468956	0.197731658816338	0.198039576411247	0.237682774662972	0.185204297304153	0.159861400723457	0.133905187249184
1138	0.0107209635898471	0.124454207718372	0.0190229322761297	0.0526057220995426	0.0833564475178719	0.0350136421620846	0.0562770366668701	0.113454945385456	0.211057811975479	0.0474633313715458	0.0637302622199059	0.104386642575264	0.140885233879089	0.221668869256973	0.124045237898827	0.246480122208595	0.246277570724487	0.191698551177979	0.185855567455292	0.237496092915535	0.178485497832298	0.197852298617363	0.198140025138855	0.237681090831757	0.185786604881287	0.160391598939896	0.134402006864548
1140	0.0107789710164070	0.124684996902943	0.0190956462174654	0.0527234226465225	0.0834348201751709	0.0350790843367577	0.0564123131334782	0.113650776445866	0.211373150348663	0.0475587174296379	0.0638470202684403	0.104573324322701	0.141177833080292	0.222206339240074	0.124190606176853	0.246687322854996	0.246700823307037	0.191847711801529	0.186100170016289	0.237816050648689	0.178721845149994	0.198327630758286	0.198640257120132	0.237603187561035	0.186401039361954	0.160767555236816	0.134729668498039
1142	0.0107950046658516	0.124936901032925	0.0191760156303644	0.0528605729341507	0.0835436210036278	0.0350952781736851	0.0565636008977890	0.113907568156719	0.211812809109688	0.0476337485015392	0.0640090629458427	0.104844138026237	0.141561016440392	0.222850963473320	0.124444536864758	0.247322916984558	0.247590824961662	0.192251369357109	0.186748117208481	0.238235428929329	0.179230406880379	0.199226990342140	0.199734300374985	0.237727716565132	0.187001392245293	0.161281585693359	0.135271474719048
1144	0.0107804900035262	0.125095739960670	0.0192047469317913	0.0529255159199238	0.0836152359843254	0.0350737683475018	0.0566306710243225	0.114101663231850	0.212114945054054	0.0476531907916069	0.0640467777848244	0.105016328394413	0.141711294651032	0.223144471645355	0.124607734382153	0.247738599777222	0.248146206140518	0.192524448037148	0.187230929732323	0.238622933626175	0.179614484310150	0.199794098734856	0.200361400842667	0.238019555807114	0.187121391296387	0.161477267742157	0.135585129261017
1146	0.0106394281610847	0.124993152916431	0.0190525501966476	0.0527869611978531	0.0835035964846611	0.0349429547786713	0.0564755462110043	0.114037327468395	0.211890757083893	0.0475673452019692	0.0638043135404587	0.104937128722668	0.141605317592621	0.223210483789444	0.124637588858604	0.248168841004372	0.248601615428925	0.192793101072311	0.187773868441582	0.239403039216995	0.180078893899918	0.200505539774895	0.200890451669693	0.238316893577576	0.187194317579269	0.161424413323402	0.135566025972366
1148	0.0104781538248062	0.124835677444935	0.0188615247607231	0.0526206418871880	0.0833626091480255	0.0348184779286385	0.0562983676791191	0.113883286714554	0.211578890681267	0.0474929697811604	0.0636114552617073	0.104870118200779	0.141519173979759	0.223299816250801	0.124659121036530	0.248567044734955	0.248945757746696	0.192954808473587	0.188105598092079	0.240049570798874	0.180405989289284	0.201082170009613	0.201289266347885	0.238454297184944	0.187489464879036	0.161428436636925	0.135513618588448
1150	0.0104284649714828	0.124886877834797	0.0188241209834814	0.0525877922773361	0.0833684504032135	0.0348029248416424	0.0563882179558277	0.113853365182877	0.211643874645233	0.0474481806159020	0.0636817142367363	0.104999080300331	0.141620069742203	0.223733067512512	0.124892808496952	0.248961061239243	0.249196603894234	0.193129971623421	0.188293546438217	0.240503221750259	0.180700302124023	0.201646625995636	0.201788902282715	0.238498121500015	0.188041374087334	0.161686673760414	0.135817334055901
1152	0.0104077514261007	0.125042125582695	0.0188201479613781	0.0526131652295589	0.0834194272756577	0.0348161160945892	0.0566254109144211	0.113970726728439	0.211894825100899	0.0474183075129986	0.0637939795851708	0.105169296264648	0.141784161329269	0.224346369504929	0.125192686915398	0.249344244599342	0.249524563550949	0.193334624171257	0.188558652997017	0.240785554051399	0.180970877408981	0.202199742197990	0.202309682965279	0.238532498478889	0.188555970788002	0.162051320075989	0.136302456259727
1154	0.0104875862598419	0.125211820006371	0.0188769437372684	0.0527711100876331	0.0835758596658707	0.0349273830652237	0.0569027736783028	0.114143893122673	0.212100431323051	0.0475410595536232	0.0638969987630844	0.105373769998550	0.141993179917336	0.224896922707558	0.125485062599182	0.249651551246643	0.250067561864853	0.193613573908806	0.188915282487869	0.241245478391647	0.181191384792328	0.202862784266472	0.202914938330650	0.238784983754158	0.189287617802620	0.162537962198257	0.136838406324387
1156	0.0107194222509861	0.125576928257942	0.0190912466496229	0.0531578846275806	0.0840118676424027	0.0352291874587536	0.0574011392891407	0.114477030932903	0.212519660592079	0.0478491522371769	0.0641253441572189	0.105878531932831	0.142392918467522	0.225665077567101	0.125927075743675	0.250145405530930	0.250923514366150	0.194053113460541	0.189508721232414	0.241985589265823	0.181503534317017	0.203694447875023	0.203848063945770	0.239369884133339	0.190044820308685	0.163253575563431	0.137550786137581
1158	0.0108337644487619	0.125794753432274	0.0192148275673389	0.0533527694642544	0.0842381715774536	0.0354012697935104	0.0577309392392635	0.114718370139599	0.212780803442001	0.0480139404535294	0.0642183721065521	0.106162540614605	0.142653718590736	0.226202756166458	0.126181364059448	0.250528007745743	0.251597851514816	0.194389387965202	0.189952880144119	0.242535948753357	0.181882470846176	0.204454183578491	0.204574123024941	0.240203499794006	0.190575644373894	0.163592457771301	0.137898966670036
1160	0.0108025241643190	0.125888481736183	0.0191753190010786	0.0533847324550152	0.0842235013842583	0.0354254953563213	0.0578534416854382	0.114814870059490	0.212932571768761	0.0480405278503895	0.0642572119832039	0.106266640126705	0.142927542328835	0.226917102932930	0.126535624265671	0.251041859388351	0.252524733543396	0.194815739989281	0.190582871437073	0.243297725915909	0.182537406682968	0.205698564648628	0.205577000975609	0.241037666797638	0.191203892230988	0.163921386003494	0.138258114457130
1162	0.0107540329918265	0.125972628593445	0.0191352833062410	0.0534077398478985	0.0841768831014633	0.0354137904942036	0.0578785613179207	0.114904426038265	0.213122785091400	0.0480468906462193	0.0643154010176659	0.106376804411411	0.143144592642784	0.227547183632851	0.126818552613258	0.251425623893738	0.253131479024887	0.194997265934944	0.191030010581017	0.243732288479805	0.182980775833130	0.206445425748825	0.206269025802612	0.241802111268044	0.191765427589417	0.164210677146912	0.138537108898163
1164	0.0106916539371014	0.126143127679825	0.0191214736551046	0.0534701421856880	0.0842073112726212	0.0353633053600788	0.0577440448105335	0.115029394626617	0.213383048772812	0.0480654127895832	0.0644252449274063	0.106697142124176	0.143514275550842	0.228228613734245	0.127229794859886	0.252100318670273	0.253715693950653	0.195224300026894	0.191476717591286	0.244439601898193	0.183568909764290	0.207145184278488	0.207004994153976	0.242561101913452	0.192424744367600	0.164695769548416	0.139010876417160
1166	0.0106222089380026	0.126342162489891	0.0191022362560034	0.0535352714359760	0.0842785835266113	0.0353123657405376	0.0575726628303528	0.115253999829292	0.213676646351814	0.0480880811810494	0.0645420178771019	0.107095353305340	0.143838465213776	0.228747561573982	0.127708092331886	0.252807378768921	0.254415333271027	0.195572808384895	0.191939413547516	0.245358020067215	0.184106275439262	0.207770392298698	0.207691699266434	0.243099287152290	0.192881926894188	0.165114343166351	0.139542296528816
1168	0.0106259463354945	0.126447424292564	0.0191227793693542	0.0535835847258568	0.0844005569815636	0.0353554300963879	0.0574924349784851	0.115366883575916	0.213841110467911	0.0482162237167358	0.0646836832165718	0.107425995171070	0.144043311476707	0.229190632700920	0.128311261534691	0.253697216510773	0.255667299032211	0.196446031332016	0.193082645535469	0.247006744146347	0.184824392199516	0.208886116743088	0.208932712674141	0.243905991315842	0.193335279822350	0.165561452507973	0.139995291829109
1170	0.0106685133650899	0.126554444432259	0.0191850103437901	0.0536521486938000	0.0846006572246552	0.0354380793869495	0.0574817657470703	0.115514300763607	0.214124053716660	0.0484416484832764	0.0648506730794907	0.107863008975983	0.144388124346733	0.229822114109993	0.129052057862282	0.254791289567947	0.257017731666565	0.197386041283607	0.194561928510666	0.248597100377083	0.185596138238907	0.210003733634949	0.210268527269363	0.244875356554985	0.193816915154457	0.166141822934151	0.140470981597900
1172	0.0106933088973165	0.126616582274437	0.0192336682230234	0.0537489503622055	0.0847054719924927	0.0354856774210930	0.0574800632894039	0.115633964538574	0.214353278279305	0.0485452972352505	0.0649480223655701	0.108137272298336	0.144859924912453	0.230353936553001	0.129522696137428	0.255233615636826	0.257549226284027	0.197726666927338	0.195478647947311	0.249344304203987	0.186103224754334	0.210354909300804	0.210937276482582	0.246013775467873	0.194517284631729	0.166615501046181	0.140873849391937
1174	0.0107234828174114	0.126725584268570	0.0193105265498161	0.0539838671684265	0.0848276913166046	0.0355843752622604	0.0575734376907349	0.115790903568268	0.214743003249168	0.0486149340867996	0.0651079937815666	0.108523346483707	0.145584657788277	0.231201425194740	0.130195647478104	0.255546271800995	0.258016079664230	0.198020607233047	0.196607679128647	0.250084221363068	0.186809748411179	0.210726693272591	0.211649209260941	0.246845766901970	0.195467665791512	0.167294889688492	0.141537994146347
1176	0.0107528725638986	0.126877367496490	0.0193751938641071	0.0541998334228992	0.0849632844328880	0.0356652550399303	0.0576730817556381	0.115953981876373	0.215146273374558	0.0486984401941299	0.0653075203299522	0.108982205390930	0.146116539835930	0.231964096426964	0.131111785769463	0.255968511104584	0.258679300546646	0.198448821902275	0.197871834039688	0.251330852508545	0.187533214688301	0.211476013064384	0.212553545832634	0.247618839144707	0.196664214134216	0.168084695935249	0.142248988151550
1178	0.0108088487759233	0.127314433455467	0.0194341428577900	0.0544988289475441	0.0852879732847214	0.0357988886535168	0.0579536817967892	0.116318546235561	0.215965002775192	0.0489541031420231	0.0657608881592751	0.109932549297810	0.147087022662163	0.233452677726746	0.132916346192360	0.256977915763855	0.260100483894348	0.199397400021553	0.200124874711037	0.253726035356522	0.188945502042770	0.212977424263954	0.214250758290291	0.248593196272850	0.198178648948669	0.169698402285576	0.143743485212326
1180	0.0108406580984592	0.127729251980782	0.0194787308573723	0.0547572113573551	0.0855521112680435	0.0359150134027004	0.0582641698420048	0.116802662611008	0.216687873005867	0.0491206236183643	0.0661105588078499	0.110738717019558	0.147910475730896	0.234675049781799	0.134361028671265	0.257795304059982	0.261209428310394	0.200118273496628	0.202250540256500	0.255718588829041	0.190108805894852	0.214183226227760	0.215803965926170	0.249679788947105	0.199286729097366	0.170940592885017	0.144979700446129
1182	0.0107911610975862	0.127875789999962	0.0194287505000830	0.0549065433442593	0.0855853706598282	0.0359169878065586	0.0584160946309567	0.116986691951752	0.216859355568886	0.0490917153656483	0.0662551969289780	0.111144043505192	0.148726448416710	0.235936895012856	0.135577216744423	0.258951395750046	0.262383162975311	0.200946956872940	0.204613506793976	0.257783263921738	0.191454246640205	0.215839698910713	0.217829957604408	0.250992774963379	0.200578942894936	0.172074586153030	0.145904004573822
1184	0.0107276532799006	0.127963706851006	0.0193370301276445	0.0550662092864513	0.0855771154165268	0.0358942896127701	0.0585766285657883	0.117087349295616	0.217059850692749	0.0490728616714478	0.0664146840572357	0.111545741558075	0.149513989686966	0.237217009067535	0.136816725134850	0.260170459747314	0.263493329286575	0.201717585325241	0.206923618912697	0.259681761264801	0.192733809351921	0.217306926846504	0.219702333211899	0.252163559198380	0.201914235949516	0.173152327537537	0.146695777773857
1186	0.0107265105471015	0.128082498908043	0.0193319413810968	0.0552310347557068	0.0857284963130951	0.0359433777630329	0.0586730428040028	0.117201983928680	0.217442557215691	0.0492106862366200	0.0666944533586502	0.112085238099098	0.150428518652916	0.238411739468575	0.138169467449188	0.261458337306976	0.264811903238297	0.202716305851936	0.209199786186218	0.262034118175507	0.194305643439293	0.219012111425400	0.221633478999138	0.253551363945007	0.203640550374985	0.174350753426552	0.147558495402336
1188	0.0107521843165159	0.128347069025040	0.0193866975605488	0.0554801821708679	0.0860382094979286	0.0360446088016033	0.0588797852396965	0.117515556514263	0.218186229467392	0.0494551397860050	0.0671118125319481	0.112891606986523	0.151600033044815	0.239812582731247	0.139575272798538	0.262947022914887	0.266347438097000	0.203758805990219	0.211394861340523	0.264404743909836	0.195970296859741	0.220818951725960	0.223596662282944	0.254871726036072	0.205175533890724	0.175697386264801	0.148663491010666
1190	0.0107654491439462	0.128542140126228	0.0194177087396383	0.0557071119546890	0.0862153768539429	0.0361073277890682	0.0590321496129036	0.117758437991142	0.218608662486076	0.0495668537914753	0.0672744736075401	0.113312840461731	0.152228608727455	0.240756079554558	0.140277102589607	0.263984262943268	0.267534524202347	0.204448372125626	0.213003531098366	0.266015350818634	0.197167202830315	0.222260445356369	0.225238308310509	0.256356269121170	0.206500872969627	0.176607832312584	0.149417400360107
1192	0.0107707111164927	0.128847941756248	0.0194439794868231	0.0560804829001427	0.0863596573472023	0.0361687466502190	0.0591757372021675	0.118012376129627	0.219013541936874	0.0496597252786160	0.0673938393592835	0.113766185939312	0.152928993105888	0.241922229528427	0.140956342220306	0.265229582786560	0.269019037485123	0.205279543995857	0.214699760079384	0.267396032810211	0.198467567563057	0.223794430494308	0.227085456252098	0.257712304592133	0.207896113395691	0.177729472517967	0.150381177663803
1194	0.0107664074748755	0.129063561558723	0.0194660536944866	0.0563482381403446	0.0864459425210953	0.0362118929624558	0.0592850260436535	0.118228487670422	0.219311371445656	0.0497515201568604	0.0675043985247612	0.114074565470219	0.153357282280922	0.242619514465332	0.141334056854248	0.265873432159424	0.269787549972534	0.205765664577484	0.215617924928665	0.268319725990295	0.199262827634811	0.224741116166115	0.228221699595451	0.259014636278152	0.209242478013039	0.178643807768822	0.151017531752586
1196	0.0107557941228151	0.129239782691002	0.0194945391267538	0.0565878897905350	0.0865645781159401	0.0363083109259605	0.0593996308743954	0.118361674249172	0.219668179750443	0.0499659143388271	0.0676466897130013	0.114385828375816	0.153836533427238	0.243477061390877	0.141706898808479	0.266524314880371	0.270281940698624	0.206341251730919	0.216420918703079	0.269617766141892	0.200200557708740	0.225875243544579	0.229294717311859	0.260258018970490	0.210754543542862	0.179953157901764	0.151932775974274
1198	0.0107553964480758	0.129417970776558	0.0195307098329067	0.0568092316389084	0.0867192372679710	0.0364193022251129	0.0595273040235043	0.118513084948063	0.220045283436775	0.0501548238098621	0.0677698999643326	0.114679634571075	0.154278829693794	0.244220167398453	0.142064318060875	0.266874521970749	0.270528316497803	0.206619277596474	0.216877207159996	0.270430803298950	0.200816556811333	0.226544752717018	0.229925811290741	0.261153519153595	0.212131276726723	0.181032374501228	0.152780622243881
1200	0.0107980389147997	0.129740223288536	0.0195888523012400	0.0570380799472332	0.0869919359683991	0.0365231186151505	0.0596968866884708	0.118751883506775	0.220481932163239	0.0502981729805470	0.0679995194077492	0.115042671561241	0.155145660042763	0.245370641350746	0.142938464879990	0.266854852437973	0.270648926496506	0.206668391823769	0.217330440878868	0.270803511142731	0.201467737555504	0.227198615670204	0.230526834726334	0.261818021535873	0.213857606053352	0.182477205991745	0.153964281082153
1202	0.0108604310080409	0.130148515105248	0.0196812096983194	0.0573166683316231	0.0872870534658432	0.0366355851292610	0.0599285438656807	0.119208417832851	0.221044287085533	0.0504578687250614	0.0682938545942307	0.115435473620892	0.156020849943161	0.246481880545616	0.143826693296433	0.266871154308319	0.270701378583908	0.206714510917664	0.217914655804634	0.271154403686523	0.202092528343201	0.227774113416672	0.231158494949341	0.262177020311356	0.215246126055717	0.183764189481735	0.155096471309662
1204	0.0109235579147935	0.130326375365257	0.0197468455880880	0.0576269701123238	0.0874541774392128	0.0367873571813107	0.0601180121302605	0.119498006999493	0.221351623535156	0.0506513565778732	0.0686025917530060	0.115712314844131	0.156536310911179	0.247010916471481	0.144442051649094	0.267423659563065	0.271068423986435	0.207134813070297	0.219123154878616	0.272448778152466	0.203144118189812	0.228794813156128	0.232600942254066	0.262800574302673	0.216548427939415	0.184835299849510	0.155976533889771
1206	0.0110206166282296	0.130508616566658	0.0198331028223038	0.0580660328269005	0.0877083688974381	0.0370211862027645	0.0604345612227917	0.119793802499771	0.221764042973518	0.0508891940116882	0.0690094903111458	0.116015523672104	0.157012835144997	0.247504919767380	0.145112529397011	0.268134832382202	0.271649628877640	0.207640275359154	0.220368742942810	0.273837506771088	0.204100444912910	0.229705154895782	0.234120935201645	0.263497263193131	0.217304453253746	0.185887545347214	0.156836450099945
1208	0.0110207255929708	0.130536973476410	0.0198322068899870	0.0581176728010178	0.0877030342817307	0.0370049141347408	0.0604950524866581	0.119845397770405	0.221861332654953	0.0508310869336128	0.0690242946147919	0.115947708487511	0.157001689076424	0.247434735298157	0.145216599106789	0.268401116132736	0.271998465061188	0.207812115550041	0.220956385135651	0.274529993534088	0.204294323921204	0.229992032051086	0.234746590256691	0.264001041650772	0.217226147651672	0.186007320880890	0.156847283244133
1210	0.0109137827530503	0.130362883210182	0.0196892097592354	0.0577702783048153	0.0873473733663559	0.0367112047970295	0.0602118298411369	0.119392372667789	0.221589207649231	0.0504729300737381	0.0687080174684525	0.115545623004436	0.156606256961823	0.247015744447708	0.145089283585548	0.268515408039093	0.272356361150742	0.207850769162178	0.221534565091133	0.274964302778244	0.204349964857101	0.230115652084351	0.235106110572815	0.264121770858765	0.216932132840157	0.185773685574532	0.156384050846100
1212	0.0108570726588368	0.130258753895760	0.0195861645042896	0.0575550533831120	0.0871803164482117	0.0365462936460972	0.0599933937191963	0.119013324379921	0.221454799175262	0.0502817891538143	0.0685632005333901	0.115335814654827	0.156358972191811	0.246822357177734	0.145019233226776	0.268368870019913	0.272246152162552	0.207683935761452	0.221543580293655	0.274570524692535	0.204167991876602	0.229596242308617	0.234581708908081	0.263905405998230	0.216481864452362	0.185417115688324	0.155984461307526
1214	0.0108545245602727	0.130356118083000	0.0195814706385136	0.0575137324631214	0.0872848033905029	0.0365448631346226	0.0599634647369385	0.119041077792645	0.221682548522949	0.0502867810428143	0.0686066076159477	0.115219600498676	0.156236201524735	0.246591091156006	0.144785925745964	0.268012791872025	0.271545737981796	0.207311168313026	0.221049845218658	0.273429036140442	0.203501969575882	0.228306323289871	0.233084946870804	0.263521820306778	0.215581282973290	0.184643149375916	0.155307248234749
1216	0.0108459070324898	0.130475804209709	0.0195862893015146	0.0574644766747952	0.0873524546623230	0.0365529842674732	0.0599398203194141	0.119122341275215	0.221871688961983	0.0503012165427208	0.0685884654521942	0.115064695477486	0.156105622649193	0.246353104710579	0.144505873322487	0.267588555812836	0.270844548940659	0.206909373402596	0.220473676919937	0.272421121597290	0.202689275145531	0.227198481559753	0.231747403740883	0.262727022171021	0.214370772242546	0.183869585394859	0.154639780521393
1218	0.0107914898544550	0.130508050322533	0.0195475891232491	0.0572530739009380	0.0872913673520088	0.0364965759217739	0.0597171857953072	0.119007356464863	0.221888259053230	0.0501100569963455	0.0683696195483208	0.114574082195759	0.155624046921730	0.245879709720612	0.144016727805138	0.266233980655670	0.269721001386642	0.205981642007828	0.219285756349564	0.270987868309021	0.201100066304207	0.225496962666512	0.229726225137711	0.261462360620499	0.212610334157944	0.182443484663963	0.153473258018494
1220	0.0107343140989542	0.130532786250114	0.0195002742111683	0.0569830387830734	0.0872213318943977	0.0364458523690701	0.0594272203743458	0.118759863078594	0.221869304776192	0.0498641952872276	0.0681579932570458	0.113999612629414	0.155170738697052	0.245337367057800	0.143476292490959	0.264992147684097	0.268723398447037	0.205190941691399	0.218171447515488	0.269518792629242	0.199739724397659	0.223972141742706	0.227992922067642	0.260152667760849	0.211106985807419	0.181088805198669	0.152347847819328
1222	0.0107833975926042	0.130624994635582	0.0195497572422028	0.0568362660706043	0.0872452557086945	0.0364731773734093	0.0593962930142880	0.118695370852947	0.221909180283546	0.0497844293713570	0.0680958852171898	0.113586381077766	0.154858276247978	0.244561195373535	0.142882585525513	0.263993978500366	0.267557233572006	0.204244032502174	0.216518327593803	0.267637670040131	0.198317378759384	0.222074434161186	0.226062968373299	0.258606404066086	0.209530577063560	0.179863929748535	0.151418924331665
1224	0.0108985463157296	0.130791425704956	0.0196673423051834	0.0567028261721134	0.0873359665274620	0.0365283042192459	0.0594554692506790	0.118730857968330	0.222042679786682	0.0497369691729546	0.0680268704891205	0.113030329346657	0.154479518532753	0.243547186255455	0.142213284969330	0.263056427240372	0.266450643539429	0.203334793448448	0.214719846844673	0.265951126813889	0.196916446089745	0.220354616641998	0.224158182740212	0.257262736558914	0.207986280322075	0.178560957312584	0.150348499417305
1226	0.0109271062538028	0.130800515413284	0.0197095368057489	0.0565444305539131	0.0873693972826004	0.0365262068808079	0.0594031214714050	0.118710152804852	0.221993774175644	0.0496456883847714	0.0678846985101700	0.112589642405510	0.153956830501556	0.242523208260536	0.141414240002632	0.262136816978455	0.265497118234634	0.202461555600166	0.213102608919144	0.264248102903366	0.195505768060684	0.218874648213387	0.222215279936790	0.255714118480682	0.206268116831779	0.177304521203041	0.149357929825783
1228	0.0109096076339483	0.130666896700859	0.0197092164307833	0.0562458522617817	0.0873256102204323	0.0364783518016338	0.0591697022318840	0.118634484708309	0.221653699874878	0.0494782850146294	0.0676300227642059	0.111967921257019	0.153018802404404	0.241096273064613	0.140121534466743	0.260872721672058	0.264358550310135	0.201520606875420	0.211180105805397	0.262231707572937	0.193993493914604	0.217273384332657	0.220109298825264	0.254348933696747	0.204588115215302	0.175617158412933	0.147994443774223
1230	0.0108851147815585	0.130539700388908	0.0196964163333178	0.0560039058327675	0.0872064828872681	0.0364056937396526	0.0589914657175541	0.118542991578579	0.221385464072227	0.0493543185293675	0.0673962086439133	0.111419789493084	0.152283728122711	0.240222558379173	0.138962343335152	0.260059744119644	0.263625830411911	0.200940296053886	0.209275886416435	0.260221451520920	0.192968860268593	0.216094121336937	0.218518987298012	0.252988070249558	0.203014224767685	0.174413755536079	0.146996796131134
1232	0.0108188716694713	0.130321398377419	0.0196457337588072	0.0557192265987396	0.0869162827730179	0.0362318307161331	0.0587229654192925	0.118209019303322	0.220995783805847	0.0491458922624588	0.0669841468334198	0.110443897545338	0.151209056377411	0.239163830876350	0.137195497751236	0.259099781513214	0.262846678495407	0.200272455811501	0.206807374954224	0.257957041263580	0.191847220063210	0.214806735515594	0.216731503605843	0.251839935779572	0.201392903923988	0.172920033335686	0.145787641406059
1234	0.0107640409842134	0.130173146724701	0.0195979345589876	0.0555072911083698	0.0867069661617279	0.0361101888120174	0.0584877729415894	0.117845818400383	0.220670342445374	0.0490009523928165	0.0666949823498726	0.109743878245354	0.150493726134300	0.238437965512276	0.135927751660347	0.258560508489609	0.262484937906265	0.199956506490707	0.205072283744812	0.256684392690659	0.191127032041550	0.214094370603561	0.215601235628128	0.251015275716782	0.200328260660172	0.171914845705032	0.145018935203552
1236	0.0107361823320389	0.130139797925949	0.0195575486868620	0.0553483963012695	0.0866222828626633	0.0360173135995865	0.0583329275250435	0.117721192538738	0.220374539494514	0.0489452891051769	0.0665137991309166	0.109486989676952	0.149798199534416	0.237582087516785	0.134761244058609	0.258012115955353	0.262121975421906	0.199624925851822	0.203105315566063	0.255240023136139	0.190234631299973	0.213227123022079	0.214350104331970	0.250289708375931	0.199428126215935	0.170835882425308	0.144318178296089
1238	0.0107154194265604	0.130108937621117	0.0195194222033024	0.0552222952246666	0.0865456163883209	0.0359446257352829	0.0581910163164139	0.117620997130871	0.220075458288193	0.0489265024662018	0.0663803219795227	0.109293036162853	0.149353995919228	0.236955687403679	0.133936986327171	0.257527828216553	0.261634469032288	0.199244111776352	0.201727747917175	0.253978461027145	0.189599886536598	0.212589681148529	0.213381990790367	0.249680757522583	0.198942899703980	0.170135155320168	0.143864631652832
1240	0.0106985969468951	0.130110383033752	0.0195174049586058	0.0552112348377705	0.0864907652139664	0.0359603613615036	0.0580984503030777	0.117558903992176	0.220039278268814	0.0489399060606957	0.0661895945668221	0.108979798853397	0.149203211069107	0.236662432551384	0.133183985948563	0.256432622671127	0.260581582784653	0.198340669274330	0.200152069330215	0.252500116825104	0.188786119222641	0.211717426776886	0.212069690227509	0.248867601156235	0.198642343282700	0.169842064380646	0.143601611256599
1242	0.0106833111494780	0.130128964781761	0.0195185802876949	0.0552028007805347	0.0864546000957489	0.0359868705272675	0.0579678863286972	0.117506340146065	0.220063969492912	0.0489706024527550	0.0659769251942635	0.108600601553917	0.149119436740875	0.236436054110527	0.132538199424744	0.255557566881180	0.259818166494370	0.197699800133705	0.199015989899635	0.251619577407837	0.188247010111809	0.211221814155579	0.211237072944641	0.248129025101662	0.198584914207459	0.169650495052338	0.143372565507889
1244	0.0107261603698134	0.130131155252457	0.0195342656224966	0.0552159696817398	0.0865156501531601	0.0360458344221115	0.0579757764935494	0.117519125342369	0.220119446516037	0.0490799956023693	0.0659686699509621	0.108606211841106	0.149179384112358	0.236491575837135	0.132468879222870	0.255433857440949	0.259828418493271	0.197500422596931	0.198329970240593	0.251300364732742	0.187989726662636	0.211427703499794	0.211360067129135	0.247500613331795	0.198760271072388	0.169654846191406	0.143481105566025
1246	0.0108297271654010	0.130137681961060	0.0195858869701624	0.0552941821515560	0.0866223424673080	0.0361613146960735	0.0581038258969784	0.117612235248089	0.220280677080154	0.0492554716765881	0.0660350024700165	0.108899384737015	0.149248078465462	0.236586555838585	0.132466971874237	0.255479961633682	0.260054260492325	0.197427272796631	0.197692170739174	0.251199930906296	0.187843084335327	0.211735025048256	0.211660325527191	0.247279390692711	0.198779776692390	0.169745981693268	0.143714636564255
1248	0.0108339693397284	0.130065485835075	0.0195669587701559	0.0552826821804047	0.0865097120404244	0.0361160002648830	0.0580934286117554	0.117584384977818	0.220158725976944	0.0492041371762753	0.0659880116581917	0.108950950205326	0.149144470691681	0.236235603690147	0.132321164011955	0.255781084299088	0.260478377342224	0.197622388601303	0.197786703705788	0.251357257366180	0.188158139586449	0.212150052189827	0.212170884013176	0.247353002429008	0.198595643043518	0.169664278626442	0.143625244498253
1250	0.0107121560722590	0.129693120718002	0.0193765666335821	0.0551102682948113	0.0861278325319290	0.0358614586293697	0.0578118115663528	0.117121271789074	0.219335243105888	0.0489195697009563	0.0657353624701500	0.108667731285095	0.148878067731857	0.235527679324150	0.132009416818619	0.256243109703064	0.261002928018570	0.197924345731735	0.198166549205780	0.251531958580017	0.188569739460945	0.212698176503181	0.212841406464577	0.247588917613029	0.198584765195847	0.169458389282227	0.143271952867508
1252	0.0106431376188993	0.129424855113029	0.0192508902400732	0.0550002604722977	0.0859297960996628	0.0357261560857296	0.0576102808117867	0.116708196699619	0.218741208314896	0.0487845465540886	0.0655738562345505	0.108464434742928	0.148729741573334	0.235334232449532	0.131828561425209	0.256274402141571	0.261056244373322	0.197938799858093	0.198223024606705	0.251481950283051	0.188592687249184	0.212956264615059	0.213056311011314	0.247853338718414	0.198917418718338	0.169482842087746	0.143215596675873
1254	0.0106501774862409	0.129263326525688	0.0192772801965475	0.0550058111548424	0.0858338698744774	0.0357281155884266	0.0576004534959793	0.116671279072762	0.218523636460304	0.0487937517464161	0.0655568689107895	0.108348853886127	0.148526787757874	0.235497966408730	0.131700158119202	0.256057232618332	0.260813683271408	0.197747603058815	0.198124453425407	0.251499474048615	0.188547968864441	0.213211387395859	0.213220909237862	0.248006656765938	0.199420616030693	0.169781103730202	0.143493637442589
1256	0.0106548769399524	0.129184365272522	0.0193168222904205	0.0550468675792217	0.0857802331447601	0.0357578471302986	0.0576364137232304	0.116759859025478	0.218409597873688	0.0488159544765949	0.0655680298805237	0.108302392065525	0.148486748337746	0.235763236880302	0.131755828857422	0.255976319313049	0.260760903358460	0.197595849633217	0.198085188865662	0.251678079366684	0.188608184456825	0.213420629501343	0.213492169976234	0.248116433620453	0.199966728687286	0.170079618692398	0.143784895539284
1258	0.0106038842350245	0.129292100667954	0.0193108115345240	0.0551103912293911	0.0858340337872505	0.0357904434204102	0.0576810240745544	0.116941355168819	0.218428313732147	0.0489023588597775	0.0655666515231133	0.108542546629906	0.148821875452995	0.236350640654564	0.132196545600891	0.256057649850845	0.260976970195770	0.197474896907806	0.198096126317978	0.251897364854813	0.188763856887817	0.213729187846184	0.214061498641968	0.248336762189865	0.200770348310471	0.170729979872704	0.144368454813957
1260	0.0105395559221506	0.129408463835716	0.0193098951131105	0.0551931411027908	0.0858695358037949	0.0358189642429352	0.0577405877411366	0.117138817906380	0.218499511480331	0.0490317977964878	0.0655500367283821	0.108839735388756	0.149135619401932	0.236800283193588	0.132538780570030	0.256165117025375	0.261153310537338	0.197523057460785	0.198195323348045	0.251951545476913	0.188960045576096	0.214136853814125	0.214511483907700	0.248610302805901	0.201251804828644	0.171273708343506	0.144912421703339
1262	0.0105151832103729	0.129384398460388	0.0193383563309908	0.0552720129489899	0.0858193039894104	0.0357823818922043	0.0577673763036728	0.117078937590122	0.218425452709198	0.0491318404674530	0.0655994713306427	0.109020814299583	0.149285316467285	0.237049698829651	0.132670640945435	0.256596565246582	0.261451184749603	0.197850659489632	0.198486343026161	0.252195656299591	0.189639627933502	0.215119242668152	0.215253993868828	0.249005556106567	0.201703757047653	0.171658724546433	0.145323887467384
1264	0.0105075826868415	0.129286974668503	0.0193728879094124	0.0553621612489224	0.0857391059398651	0.0357017107307911	0.0577551983296871	0.116872832179070	0.218247041106224	0.0491956882178783	0.0656620338559151	0.109206132590771	0.149384379386902	0.237215310335159	0.132842302322388	0.257091283798218	0.261827379465103	0.198125213384628	0.198865205049515	0.252697110176086	0.190364554524422	0.215945646166801	0.216049358248711	0.249411612749100	0.202118083834648	0.171981468796730	0.145642533898354
1266	0.0104946875944734	0.129189044237137	0.0193444173783064	0.0553444325923920	0.0856717750430107	0.0356803238391876	0.0577204227447510	0.116781502962112	0.218177914619446	0.0491260513663292	0.0655644908547401	0.109340317547321	0.149366855621338	0.237304568290710	0.133027344942093	0.257884770631790	0.262757360935211	0.198610842227936	0.199870064854622	0.253956675529480	0.191342338919640	0.216993257403374	0.217398062348366	0.249893382191658	0.202625498175621	0.172103941440582	0.145798861980438
1268	0.0104542383924127	0.129066154360771	0.0192606393247843	0.0552546456456184	0.0855567902326584	0.0356867127120495	0.0576656535267830	0.116671569645405	0.218050956726074	0.0489955246448517	0.0654007941484451	0.109484829008579	0.149335116147995	0.237458422780037	0.133217960596085	0.258680135011673	0.263714790344238	0.199050039052963	0.200820133090019	0.254934519529343	0.192188069224358	0.217890337109566	0.218617901206017	0.250247776508331	0.203059032559395	0.172261714935303	0.145970344543457
1270	0.0104583920910954	0.129042640328407	0.0192408785223961	0.0552446134388447	0.0855437591671944	0.0357054024934769	0.0576411671936512	0.116623528301716	0.217942297458649	0.0490355491638184	0.0654047653079033	0.109535358846188	0.149427101016045	0.237388148903847	0.133291095495224	0.258538722991943	0.263672441244125	0.198850914835930	0.200673937797546	0.254637628793716	0.192339137196541	0.218204289674759	0.218687251210213	0.250560045242310	0.203316062688828	0.172484502196312	0.146119847893715
1272	0.0105546824634075	0.129134058952332	0.0193215459585190	0.0552906394004822	0.0856528505682945	0.0357460491359234	0.0576645210385323	0.116731114685535	0.217826992273331	0.0492759570479393	0.0655059516429901	0.109593808650970	0.149672731757164	0.237205624580383	0.133366420865059	0.258115828037262	0.263402909040451	0.198554605245590	0.200226262211800	0.254062473773956	0.192331537604332	0.218455612659454	0.218456476926804	0.250616759061813	0.203568845987320	0.172849372029305	0.146357342600822
1274	0.0106274262070656	0.129266232252121	0.0193936359137297	0.0553663559257984	0.0857615917921066	0.0357891805469990	0.0577293559908867	0.116869062185287	0.217829048633575	0.0494269505143166	0.0655950233340263	0.109645463526249	0.149867206811905	0.237491831183434	0.133446171879768	0.258270412683487	0.263697355985642	0.198809951543808	0.200360581278801	0.254166960716248	0.192398920655251	0.218625888228416	0.218590930104256	0.250506132841110	0.203921973705292	0.173073709011078	0.146537020802498
1276	0.0106837954372168	0.129601433873177	0.0194905884563923	0.0556363500654697	0.0860287025570869	0.0359328910708427	0.0578868649899960	0.117153018712997	0.218280702829361	0.0496025644242764	0.0657304897904396	0.109728075563908	0.150137871503830	0.238310232758522	0.133580803871155	0.258928000926971	0.264448314905167	0.199317976832390	0.200763911008835	0.254530012607574	0.192596197128296	0.218895822763443	0.219040095806122	0.250598222017288	0.204357042908669	0.173379689455032	0.146902039647102
1278	0.0107099981978536	0.129841879010201	0.0195797663182020	0.0558246299624443	0.0861764475703239	0.0360279306769371	0.0580305457115173	0.117443785071373	0.218679681420326	0.0496899113059044	0.0657791569828987	0.109758101403713	0.150165408849716	0.238586589694023	0.133604049682617	0.259115308523178	0.264670550823212	0.199410662055016	0.200770601630211	0.254573374986649	0.192705318331718	0.219062283635139	0.219189256429672	0.250936865806580	0.204449772834778	0.173440262675285	0.147150218486786
1280	0.0106454566121101	0.129742488265038	0.0195570047944784	0.0557413771748543	0.0860266238451004	0.0359410867094994	0.0579699352383614	0.117299512028694	0.218295484781265	0.0496032126247883	0.0655942186713219	0.109643526375294	0.149693951010704	0.238055557012558	0.133432939648628	0.258856296539307	0.264500916004181	0.199317738413811	0.200497597455978	0.254514932632446	0.192685216665268	0.219216778874397	0.219213187694550	0.251158237457275	0.204311028122902	0.173096671700478	0.147190183401108
1282	0.0105792647227645	0.129581823945045	0.0195024479180574	0.0556544139981270	0.0858800262212753	0.0358451567590237	0.0578477233648300	0.117004245519638	0.217767715454102	0.0495443083345890	0.0654391348361969	0.109542682766914	0.149379476904869	0.237672343850136	0.133319526910782	0.258733361959457	0.264394313097000	0.199241831898689	0.200447618961334	0.254396557807922	0.192654401063919	0.219264313578606	0.219268068671227	0.251192212104797	0.204413473606110	0.172950819134712	0.147258907556534
1284	0.0105900755152106	0.129699692130089	0.0194827783852816	0.0557512417435646	0.0859599336981773	0.0358688049018383	0.0579133220016956	0.117043793201447	0.217949926853180	0.0496639572083950	0.0656156241893768	0.109690882265568	0.149571791291237	0.237991049885750	0.133601963520050	0.258820146322250	0.264392524957657	0.199032396078110	0.200650155544281	0.254196524620056	0.192638978362083	0.219258323311806	0.219376668334007	0.251160055398941	0.204931139945984	0.173525616526604	0.147443622350693
1286	0.0106095606461167	0.129958793520927	0.0194757301360369	0.0559063293039799	0.0860868990421295	0.0359405241906643	0.0580736845731735	0.117347151041031	0.218416690826416	0.0498117953538895	0.0658623129129410	0.109901554882526	0.149818316102028	0.238454982638359	0.133958443999290	0.258946031332016	0.264430344104767	0.198906034231186	0.200861021876335	0.254238069057465	0.192689433693886	0.219359621405602	0.219520539045334	0.251043021678925	0.205408215522766	0.174095332622528	0.147651031613350
1288	0.0106681184843183	0.130041822791100	0.0195114482194185	0.0560151264071465	0.0861207172274590	0.0360258519649506	0.0581727437674999	0.117534182965755	0.218573898077011	0.0498710125684738	0.0659393742680550	0.110005065798759	0.150009647011757	0.238811001181602	0.134270697832108	0.259301453828812	0.264723479747772	0.198960244655609	0.201207831501961	0.254536807537079	0.192974582314491	0.220023632049561	0.220022544264793	0.251050800085068	0.205757945775986	0.174230024218559	0.147766396403313
1290	0.0107884090393782	0.130047217011452	0.0196096189320087	0.0561776757240295	0.0861837714910507	0.0361532196402550	0.0582766719162464	0.117643430829048	0.218627274036407	0.0499004423618317	0.0659861564636231	0.110268138349056	0.150216192007065	0.239146932959557	0.134598776698113	0.259614229202271	0.265058636665344	0.198978841304779	0.201415881514549	0.254713833332062	0.193176746368408	0.220638230443001	0.220448791980743	0.251205533742905	0.205876201391220	0.174315288662910	0.147844538092613
1292	0.0107722859829664	0.130039826035500	0.0196138769388199	0.0561443231999874	0.0861770361661911	0.0361221618950367	0.0582550428807735	0.117656052112579	0.218544736504555	0.0498367622494698	0.0658803284168243	0.110354699194431	0.150272399187088	0.239183589816093	0.134500175714493	0.259358882904053	0.265070855617523	0.198789879679680	0.201161682605743	0.254544854164124	0.193038582801819	0.220636710524559	0.220522820949554	0.251156896352768	0.205729752779007	0.174246668815613	0.147790387272835
1294	0.0106037193909287	0.129979625344276	0.0194503460079432	0.0559146106243134	0.0860530585050583	0.0359049998223782	0.0580818206071854	0.117572762072086	0.218189075589180	0.0496994368731976	0.0656017363071442	0.110081747174263	0.150285303592682	0.239069446921349	0.134260550141335	0.258987426757813	0.264951288700104	0.198574453592300	0.200825169682503	0.254438698291779	0.192819818854332	0.220434606075287	0.220500454306602	0.250908881425858	0.205683916807175	0.174054697155952	0.147607088088989
1296	0.0105257946997881	0.129953950643539	0.0193441174924374	0.0557830147445202	0.0860027670860291	0.0357938222587109	0.0579838939011097	0.117480635643005	0.218027979135513	0.0496166609227657	0.0654557943344116	0.109847061336041	0.150222778320313	0.238977417349815	0.134215638041496	0.258860021829605	0.264928638935089	0.198611944913864	0.200589969754219	0.254348099231720	0.192750394344330	0.220502018928528	0.220373213291168	0.250733584165573	0.205629542469978	0.173903107643127	0.147401720285416
1298	0.0105404593050480	0.130076423287392	0.0193564034998417	0.0556781105697155	0.0859981700778008	0.0357880219817162	0.0579989887773991	0.117416605353355	0.218142271041870	0.0495063178241253	0.0653003975749016	0.109673388302326	0.150032803416252	0.239024370908737	0.134060010313988	0.258735299110413	0.264938950538635	0.198719665408134	0.200259134173393	0.254191100597382	0.192725583910942	0.220691308379173	0.220208376646042	0.250646352767944	0.205377310514450	0.173696830868721	0.147063955664635
1300	0.0105541404336691	0.130156800150871	0.0193878877907991	0.0555939823389053	0.0859702080488205	0.0357908979058266	0.0580277293920517	0.117353223264217	0.218180462718010	0.0494386255741119	0.0651814639568329	0.109506055712700	0.149816796183586	0.238921359181404	0.133775606751442	0.258540987968445	0.264684855937958	0.198565647006035	0.199988216161728	0.253896415233612	0.192472651600838	0.220563039183617	0.220005273818970	0.250461816787720	0.205000877380371	0.173453018069267	0.146880149841309
1302	0.0105427158996463	0.130001172423363	0.0194072723388672	0.0554653964936733	0.0858850553631783	0.0357795655727387	0.0579872466623783	0.117188140749931	0.217879414558411	0.0493655875325203	0.0650863572955132	0.109096214175224	0.149264171719551	0.238180041313171	0.133190423250198	0.258216798305512	0.264186263084412	0.198230206966400	0.199557602405548	0.253349721431732	0.191857948899269	0.220068782567978	0.219668716192245	0.250195443630219	0.204596340656281	0.172910273075104	0.146783560514450
1304	0.0105247832834721	0.129860773682594	0.0194190908223391	0.0553664043545723	0.0858197584748268	0.0357702039182186	0.0579168274998665	0.117000713944435	0.217610970139503	0.0492838621139526	0.0650338232517242	0.108720213174820	0.148916736245155	0.237787231802940	0.132874056696892	0.258009374141693	0.264111727476120	0.198132023215294	0.199251353740692	0.253161758184433	0.191640436649323	0.219933226704597	0.219543501734734	0.250066220760345	0.204718142747879	0.172617062926292	0.146763473749161
1306	0.0105030238628387	0.129872173070908	0.0194021724164486	0.0554428547620773	0.0858732759952545	0.0357894115149975	0.0579419322311878	0.117061227560043	0.217787384986877	0.0492732860147953	0.0650751143693924	0.108614139258862	0.149000644683838	0.238226830959320	0.133012250065804	0.257724553346634	0.264340430498123	0.198111012578011	0.198937997221947	0.253024160861969	0.191768884658813	0.220149844884872	0.219576358795166	0.250004708766937	0.205132111907005	0.172751590609550	0.146800041198730
1308	0.0104743167757988	0.129907220602036	0.0193661786615849	0.0555677972733974	0.0859732106328011	0.0358286425471306	0.0579921416938305	0.117233566939831	0.218057975172997	0.0493180677294731	0.0651063993573189	0.108604885637760	0.149146482348442	0.238689899444580	0.133184015750885	0.257607102394104	0.264522969722748	0.198076739907265	0.198935613036156	0.253105610609055	0.191946402192116	0.220380261540413	0.219757705926895	0.250052243471146	0.205357998609543	0.172921955585480	0.146855250000954
1310	0.0104193482547998	0.129899337887764	0.0193157289177179	0.0556346438825130	0.0859168842434883	0.0357700213789940	0.0580079108476639	0.117229744791985	0.218102142214775	0.0492831207811832	0.0651141330599785	0.108719892799854	0.149196788668633	0.239073291420937	0.133183136582375	0.257729142904282	0.264848917722702	0.197935536503792	0.199283614754677	0.253524601459503	0.192205771803856	0.220885127782822	0.220418229699135	0.250155746936798	0.205646291375160	0.173121556639671	0.147290691733360
1312	0.0103413360193372	0.129859521985054	0.0192310325801373	0.0557345747947693	0.0857605263590813	0.0356801599264145	0.0580348819494247	0.117111355066299	0.218133777379990	0.0492175854742527	0.0651571452617645	0.108971223235130	0.149256616830826	0.239632457494736	0.133308947086334	0.257999658584595	0.265346050262451	0.197920441627502	0.199674725532532	0.254096895456314	0.192475229501724	0.221547812223434	0.221211656928062	0.250334650278091	0.206174716353416	0.173397257924080	0.147913187742233
1314	0.0103801619261503	0.129865780472755	0.0192470196634531	0.0559126436710358	0.0858368724584580	0.0357861332595348	0.0581247955560684	0.117165409028530	0.218211904168129	0.0493455082178116	0.0652852952480316	0.109332814812660	0.149596944451332	0.240494936704636	0.133852213621140	0.258785277605057	0.266383051872253	0.198599129915237	0.200576841831207	0.255579739809036	0.193186745047569	0.223130002617836	0.222654998302460	0.250832945108414	0.207203745841980	0.174130275845528	0.148581042885780
1316	0.0105168214067817	0.129976734519005	0.0193654540926218	0.0562163554131985	0.0861187875270844	0.0360337309539318	0.0583357959985733	0.117493808269501	0.218369394540787	0.0495908819139004	0.0654998496174812	0.109865866601467	0.150183573365212	0.241637229919434	0.134622856974602	0.259561926126480	0.267389506101608	0.199263349175453	0.201587632298470	0.256932795047760	0.193905696272850	0.224738001823425	0.224086105823517	0.251401513814926	0.208215892314911	0.175151929259300	0.149392724037170
1318	0.0105629982426763	0.129985958337784	0.0194028746336699	0.0563293546438217	0.0861784592270851	0.0360811240971088	0.0584451630711556	0.117663383483887	0.218421623110771	0.0496536418795586	0.0655850693583489	0.110165417194366	0.150587260723114	0.242333680391312	0.135113164782524	0.259900093078613	0.268235743045807	0.199547186493874	0.202726051211357	0.258055865764618	0.194669485092163	0.226250097155571	0.225516125559807	0.252020269632340	0.209216579794884	0.175767049193382	0.150011688470840
1320	0.0105409100651741	0.129759803414345	0.0193487834185362	0.0563369058072567	0.0860756859183312	0.0359977632761002	0.0584968477487564	0.117591030895710	0.218298330903053	0.0496086254715920	0.0656727701425552	0.110527776181698	0.151047706604004	0.243252322077751	0.135739877820015	0.260200470685959	0.269170939922333	0.199800878763199	0.203895658254623	0.259158760309219	0.195481762290001	0.227718487381935	0.227078408002853	0.252493858337402	0.210485413670540	0.176545605063438	0.150931850075722
1322	0.0105226133018732	0.129644647240639	0.0193281210958958	0.0564180240035057	0.0860709324479103	0.0359745398163796	0.0585693567991257	0.117519728839397	0.218264356255531	0.0496636629104614	0.0657825693488121	0.110812805593014	0.151451408863068	0.244046941399574	0.136292219161987	0.260401010513306	0.269903659820557	0.200016960501671	0.204532563686371	0.260298818349838	0.196006566286087	0.229003697633743	0.228471994400024	0.253091126680374	0.212055325508118	0.177359938621521	0.151834696531296
1324	0.0105413049459457	0.129767909646034	0.0193787161260843	0.0567395016551018	0.0861638784408569	0.0360710583627224	0.0587919093668461	0.117642402648926	0.218589097261429	0.0499082542955875	0.0660179480910301	0.111311003565788	0.152264893054962	0.245578035712242	0.137254089117050	0.260710418224335	0.270927190780640	0.200325325131416	0.205338880419731	0.261926800012589	0.196719795465469	0.230677455663681	0.230283349752426	0.253604918718338	0.213850751519203	0.178726419806480	0.153393417596817
1326	0.0105674751102924	0.129855856299400	0.0194192901253700	0.0570627003908157	0.0862191841006279	0.0361852981150150	0.0590035393834114	0.117781132459641	0.218840569257736	0.0500805415213108	0.0661890208721161	0.111856341362000	0.152901425957680	0.246971800923347	0.138065800070763	0.261400252580643	0.272305697202683	0.201151221990585	0.206697329878807	0.263944596052170	0.197873324155808	0.232834279537201	0.232603654265404	0.254353880882263	0.215483784675598	0.179882258176804	0.154679626226425
1328	0.0106107946485281	0.129819750785828	0.0194301120936871	0.0574498325586319	0.0862836539745331	0.0364254117012024	0.0591968484222889	0.117904365062714	0.218722239136696	0.0503114126622677	0.0664316639304161	0.112825177609921	0.153729930520058	0.248895764350891	0.139348104596138	0.262879103422165	0.274505674839020	0.202636525034904	0.209009736776352	0.266706377267838	0.199868798255920	0.235984757542610	0.236026629805565	0.255472451448441	0.217584103345871	0.181423157453537	0.156306102871895
1330	0.0106313806027174	0.129731968045235	0.0194210130721331	0.0577839910984039	0.0863245055079460	0.0365951582789421	0.0593592077493668	0.118061922490597	0.218535304069519	0.0505034476518631	0.0666311755776405	0.113742247223854	0.154386430978775	0.250481337308884	0.140423119068146	0.263849586248398	0.276178032159805	0.203385248780251	0.210661649703980	0.268973410129547	0.201259836554527	0.238907516002655	0.239097371697426	0.256892085075378	0.219817832112312	0.182750403881073	0.157838940620422
1332	0.0105283707380295	0.129319980740547	0.0192995723336935	0.0580242462456226	0.0861951187252998	0.0365393534302712	0.0594503358006477	0.118027158081532	0.218493089079857	0.0505884997546673	0.0667290464043617	0.114539928734303	0.155182316899300	0.252349555492401	0.141608506441116	0.264947921037674	0.278054863214493	0.204032689332962	0.212464481592178	0.271665751934052	0.202853992581368	0.242331609129906	0.242604821920395	0.258150905370712	0.222535014152527	0.184418931603432	0.159650132060051
1334	0.0104207843542099	0.128847464919090	0.0191403273493052	0.0583265423774719	0.0860645323991776	0.0364873521029949	0.0595693178474903	0.117921911180019	0.218472018837929	0.0507036000490189	0.0668590590357781	0.115436382591724	0.156052783131599	0.254341840744019	0.142842724919319	0.266014486551285	0.280029118061066	0.204805389046669	0.214414566755295	0.274683773517609	0.204380556941032	0.245973214507103	0.246264263987541	0.258982568979263	0.225512236356735	0.186187833547592	0.161719247698784
1336	0.0104880416765809	0.128931000828743	0.0192147120833397	0.0588740520179272	0.0862134397029877	0.0367331430315971	0.0598862618207932	0.118086554110050	0.218556821346283	0.0511086583137512	0.0673977881669998	0.116696305572987	0.157545015215874	0.257137328386307	0.144730240106583	0.268027365207672	0.283055782318115	0.206353500485420	0.217624664306641	0.278720259666443	0.206628054380417	0.250524610280991	0.251033425331116	0.260185718536377	0.229130938649178	0.188729882240295	0.164614543318748
1338	0.0105990916490555	0.129128605127335	0.0193992741405964	0.0595387592911720	0.0864395573735237	0.0370737463235855	0.0604074858129025	0.118540190160275	0.218700706958771	0.0515411905944347	0.0680458843708038	0.118231698870659	0.158996671438217	0.259854167699814	0.146666929125786	0.269741296768189	0.285717070102692	0.207519635558128	0.220476150512695	0.282124549150467	0.208593189716339	0.254372477531433	0.255382925271988	0.261631369590759	0.231973901391029	0.191093921661377	0.167388528585434
1340	0.0105003733187914	0.128818809986115	0.0193274859338999	0.0596794672310352	0.0861818492412567	0.0369467101991177	0.0605177469551563	0.118517406284809	0.218500897288322	0.0514328032732010	0.0680248215794563	0.118943691253662	0.159509465098381	0.261302620172501	0.147813707590103	0.271489620208740	0.288464665412903	0.208748772740364	0.223328277468681	0.285296618938446	0.210802286863327	0.258034020662308	0.259869158267975	0.263319760560989	0.234282046556473	0.192556381225586	0.168991237878799
1342	0.0102517819032073	0.128127649426460	0.0190180446952581	0.0596218444406986	0.0855662375688553	0.0365880914032459	0.0604488588869572	0.117893896996975	0.217960491776466	0.0511323027312756	0.0677880123257637	0.119441390037537	0.159935429692268	0.262494236230850	0.148840397596359	0.272790014743805	0.290526956319809	0.209586292505264	0.225692629814148	0.287857383489609	0.212498575448990	0.260395318269730	0.262927353382111	0.264644354581833	0.236208096146584	0.193868935108185	0.170294433832169
1344	0.0101868435740471	0.127935573458672	0.0188928805291653	0.0596610456705093	0.0854218676686287	0.0365667827427387	0.0605170875787735	0.117589220404625	0.217718020081520	0.0510892458260059	0.0678601637482643	0.119780384004116	0.160502851009369	0.263267010450363	0.149742588400841	0.273458570241928	0.291760951280594	0.210122600197792	0.228195473551750	0.290484547615051	0.213737815618515	0.261851161718369	0.264734327793121	0.266125351190567	0.237999081611633	0.195049270987511	0.171370401978493
1346	0.0102300588041544	0.127958491444588	0.0188879352062941	0.0597862005233765	0.0855167880654335	0.0367270149290562	0.0606778524816036	0.117711529135704	0.217644244432449	0.0511617138981819	0.0681659802794457	0.120340928435326	0.161283716559410	0.264119356870651	0.150802478194237	0.273965448141098	0.292521029710770	0.210499882698059	0.230382144451141	0.292196750640869	0.214503705501556	0.262558966875076	0.265754312276840	0.267390757799149	0.239353522658348	0.196320593357086	0.172525942325592
1348	0.0102626942098141	0.127950370311737	0.0188983716070652	0.0598092377185822	0.0855830609798431	0.0367576405405998	0.0607292130589485	0.117804877460003	0.217665880918503	0.0511535964906216	0.0683461278676987	0.120584540069103	0.161561325192451	0.264247000217438	0.151508927345276	0.274236619472504	0.292343407869339	0.210497155785561	0.231838211417198	0.292510807514191	0.214539200067520	0.261926412582397	0.265741169452667	0.268587738275528	0.239961758255959	0.196860313415527	0.172877117991447
1350	0.0103050135076046	0.127937659621239	0.0189183354377747	0.0597483478486538	0.0856765210628510	0.0367071144282818	0.0607633404433727	0.117730572819710	0.217688262462616	0.0510715357959271	0.0685325190424919	0.120703168213367	0.161802574992180	0.263896912336350	0.152311787009239	0.274475663900375	0.291927188634872	0.210368111729622	0.233234629034996	0.292753487825394	0.214541658759117	0.261056452989578	0.265495091676712	0.269340217113495	0.240349173545837	0.197337463498116	0.173037186264992
1352	0.0103335501626134	0.127952501177788	0.0189324729144573	0.0597443543374538	0.0857385322451592	0.0367058105766773	0.0607632063329220	0.117638111114502	0.217674627900124	0.0510148443281651	0.0686198398470879	0.120742216706276	0.162094488739967	0.263772577047348	0.152851477265358	0.274332582950592	0.291473388671875	0.210164636373520	0.234185978770256	0.293232023715973	0.214516326785088	0.260159432888031	0.265095204114914	0.269988059997559	0.240752503275871	0.197777137160301	0.173171073198318
1354	0.0103591037914157	0.127939879894257	0.0189326778054237	0.0598031356930733	0.0857542008161545	0.0367608778178692	0.0607636161148548	0.117447987198830	0.217787027359009	0.0509622357785702	0.0686911419034004	0.120622813701630	0.162564098834991	0.263776749372482	0.153508782386780	0.273910760879517	0.290724426507950	0.209946319460869	0.235269606113434	0.293921887874603	0.214491456747055	0.259105920791626	0.264601081609726	0.270551979541779	0.241110295057297	0.198460072278976	0.173281535506248
1356	0.0103714475408196	0.127882763743401	0.0189331341534853	0.0598403625190258	0.0857547447085381	0.0367843359708786	0.0608252100646496	0.117233231663704	0.217900916934013	0.0509059391915798	0.0687514171004295	0.120570279657841	0.162786290049553	0.263768762350082	0.154028460383415	0.273891866207123	0.290401756763458	0.210029378533363	0.236397475004196	0.294751018285751	0.214797511696816	0.258717864751816	0.264664262533188	0.271156042814255	0.241552799940109	0.198907673358917	0.173336938023567
1358	0.0103371143341064	0.127746805548668	0.0189530923962593	0.0598283112049103	0.0857654884457588	0.0367794856429100	0.0607991479337215	0.117156326770782	0.217840060591698	0.0507504306733608	0.0687900856137276	0.120706357061863	0.163065105676651	0.263853073120117	0.154867962002754	0.274205237627029	0.290430516004562	0.210375770926476	0.238138169050217	0.296065568923950	0.215506583452225	0.258591026067734	0.265215963125229	0.271699368953705	0.242244407534599	0.199507907032967	0.173573166131973
1360	0.0103082582354546	0.127643957734108	0.0189704578369856	0.0598641559481621	0.0857731103897095	0.0367937497794628	0.0607937574386597	0.117133319377899	0.217752888798714	0.0506632998585701	0.0688271224498749	0.120931982994080	0.163463801145554	0.264243215322495	0.155774950981140	0.274806976318359	0.291022807359695	0.211003795266151	0.239974677562714	0.297639161348343	0.216505244374275	0.259550213813782	0.266713410615921	0.272490561008453	0.243178144097328	0.200198292732239	0.173940241336823
1362	0.0103431781753898	0.127556458115578	0.0189642831683159	0.0601887851953507	0.0858448520302773	0.0368461459875107	0.0610153265297413	0.117187626659870	0.217772454023361	0.0507442690432072	0.0689779743552208	0.121675513684750	0.164301082491875	0.265653222799301	0.157582432031631	0.276192605495453	0.292596578598022	0.212284207344055	0.242625176906586	0.300238549709320	0.218368202447891	0.262072622776032	0.270014673471451	0.273579448461533	0.244807913899422	0.201719641685486	0.174813240766525
1364	0.0103855701163411	0.127452865242958	0.0189372096210718	0.0605996400117874	0.0859443545341492	0.0368807613849640	0.0613304898142815	0.117299474775791	0.217839077115059	0.0508439093828201	0.0691407695412636	0.122666135430336	0.165120989084244	0.267290383577347	0.159569755196571	0.277548700571060	0.294389843940735	0.213569864630699	0.245342433452606	0.303377002477646	0.220196142792702	0.265067070722580	0.273767024278641	0.274757057428360	0.246663793921471	0.203185468912125	0.175822660326958
1366	0.0103360917419195	0.127329960465431	0.0188699252903461	0.0609016083180904	0.0859388113021851	0.0368592068552971	0.0615177601575851	0.117340512573719	0.217925891280174	0.0508891306817532	0.0693197995424271	0.123656235635281	0.166250616312027	0.269482433795929	0.161843568086624	0.279784321784973	0.297529011964798	0.215538874268532	0.249144926667213	0.308125585317612	0.222991004586220	0.269799292087555	0.278830021619797	0.276095002889633	0.249110162258148	0.204972147941589	0.177467137575150
1368	0.0102528277784586	0.127155199646950	0.0187811143696308	0.0612547397613525	0.0858801603317261	0.0368228442966938	0.0616764277219772	0.117359623312950	0.217993244528770	0.0509408898651600	0.0695182457566261	0.124623224139214	0.167413413524628	0.271573454141617	0.163821175694466	0.281410425901413	0.300048857927322	0.216911569237709	0.252348214387894	0.312160789966583	0.225224569439888	0.274013668298721	0.283466041088104	0.277142792940140	0.251148104667664	0.206537142395973	0.179029807448387
1370	0.0103330174461007	0.127152845263481	0.0188465546816587	0.0616360642015934	0.0859585627913475	0.0369387678802013	0.0617882087826729	0.117456905543804	0.218021571636200	0.0511320456862450	0.0697468742728233	0.125372380018234	0.168206289410591	0.273293823003769	0.165297478437424	0.282902359962463	0.302430242300034	0.218367263674736	0.255541533231735	0.316118896007538	0.227676585316658	0.278384715318680	0.288522720336914	0.278043478727341	0.253039181232452	0.207496181130409	0.179969146847725
1372	0.0105195073410869	0.127238303422928	0.0190255418419838	0.0620850175619125	0.0861220061779022	0.0371640138328075	0.0619527548551559	0.117654003202915	0.218106836080551	0.0513749197125435	0.0700256675481796	0.126196607947350	0.168771848082542	0.274903357028961	0.166394814848900	0.283744543790817	0.303759425878525	0.218952670693398	0.256731748580933	0.317425101995468	0.228707611560822	0.280645787715912	0.290936201810837	0.278206676244736	0.254012495279312	0.208104401826859	0.180622845888138
1374	0.0105301607400179	0.127243548631668	0.0190134197473526	0.0620608031749725	0.0860400125384331	0.0371560752391815	0.0618895553052425	0.117689788341522	0.218070015311241	0.0513820722699165	0.0698454007506371	0.126110047101975	0.168399930000305	0.274904012680054	0.165635541081429	0.283487141132355	0.304012328386307	0.218341395258904	0.255144953727722	0.316033184528351	0.227971106767654	0.281461507081986	0.291050583124161	0.277665972709656	0.253989338874817	0.207476735115051	0.180195122957230
1376	0.0104304496198893	0.127181872725487	0.0188039466738701	0.0617562718689442	0.0858033895492554	0.0370180644094944	0.0615936256945133	0.117554686963558	0.217812120914459	0.0512890182435513	0.0693578422069550	0.125414833426476	0.167623147368431	0.274340987205505	0.163825809955597	0.282947272062302	0.303837209939957	0.217603117227554	0.252645105123520	0.314182788133621	0.226843640208244	0.281490564346314	0.290282815694809	0.276484251022339	0.253384768962860	0.206167817115784	0.179132431745529
1378	0.0104263983666897	0.127246215939522	0.0187335107475519	0.0615194998681545	0.0857350826263428	0.0369988493621349	0.0613473244011402	0.117443844676018	0.217598184943199	0.0512615405023098	0.0690523460507393	0.124644272029400	0.166667819023132	0.273261666297913	0.161667734384537	0.281588077545166	0.302450001239777	0.216196522116661	0.248556599020958	0.310691893100739	0.224654629826546	0.279524892568588	0.287205368280411	0.274343132972717	0.251435637474060	0.204352691769600	0.177877515554428
1380	0.0105009227991104	0.127482876181602	0.0188280697911978	0.0611312948167324	0.0857262462377548	0.0370367504656315	0.0609932616353035	0.117291904985905	0.217338413000107	0.0512210205197334	0.0686816498637199	0.123339965939522	0.164956733584404	0.270941466093063	0.158587023615837	0.279862642288208	0.300726801156998	0.214628338813782	0.243672475218773	0.306067556142807	0.222032561898232	0.277041137218475	0.283321946859360	0.272246360778809	0.248610660433769	0.201512426137924	0.175975859165192
1382	0.0105142621323466	0.127545028924942	0.0188893340528011	0.0607369355857372	0.0856647938489914	0.0370005182921886	0.0607424229383469	0.117159828543663	0.217082515358925	0.0510859973728657	0.0683693885803223	0.122092887759209	0.163355931639671	0.268652439117432	0.155519559979439	0.278270393610001	0.298945665359497	0.213052764534950	0.238986551761627	0.300522685050964	0.219184771180153	0.274370610713959	0.279209345579147	0.269916057586670	0.245270669460297	0.198732197284699	0.174024671316147
1384	0.0104444725438952	0.127469286322594	0.0188895910978317	0.0601494424045086	0.0854643061757088	0.0368877574801445	0.0603441856801510	0.116903468966484	0.216469243168831	0.0507818311452866	0.0678282082080841	0.120315730571747	0.161264821887016	0.265840560197830	0.152101919054985	0.276372432708740	0.296793669462204	0.211471140384674	0.234196573495865	0.295094668865204	0.216223031282425	0.271451056003571	0.274597227573395	0.267800599336624	0.241571515798569	0.195347294211388	0.171378329396248
1386	0.0104077598080039	0.127472832798958	0.0188692621886730	0.0597044676542282	0.0853510051965714	0.0368369035422802	0.0600246451795101	0.116680346429348	0.216054126620293	0.0505652800202370	0.0674252212047577	0.118817061185837	0.159725084900856	0.263622224330902	0.149597853422165	0.274372518062592	0.294496566057205	0.209819108247757	0.229669749736786	0.290699928998947	0.213549643754959	0.268066912889481	0.270055890083313	0.265495359897614	0.238397881388664	0.192710742354393	0.169265687465668
1388	0.0103963771834970	0.127672478556633	0.0188521053642035	0.0592371560633183	0.0853139534592629	0.0367703102529049	0.0597729608416557	0.116499483585358	0.215958386659622	0.0502578355371952	0.0669694617390633	0.117234304547310	0.158157452940941	0.261170744895935	0.147221118211746	0.271857857704163	0.291671425104141	0.207888796925545	0.225211039185524	0.286411762237549	0.210786312818527	0.264162957668304	0.265437722206116	0.263189196586609	0.235279798507690	0.190082520246506	0.166887596249580
1390	0.0103885093703866	0.127869755029678	0.0188524611294270	0.0588044896721840	0.0853071585297585	0.0367056503891945	0.0595734901726246	0.116317503154278	0.215985909104347	0.0500177554786205	0.0666592866182327	0.115968689322472	0.156937390565872	0.259243041276932	0.145306810736656	0.269818723201752	0.289190769195557	0.206245198845863	0.221602901816368	0.282117545604706	0.208205580711365	0.260630637407303	0.261351644992828	0.260608345270157	0.232294127345085	0.187944531440735	0.165079385042191
1392	0.0103709409013391	0.128121614456177	0.0188562404364347	0.0583727024495602	0.0852937698364258	0.0366080254316330	0.0593149513006210	0.116217948496342	0.216163098812103	0.0497413761913776	0.0662970542907715	0.114747367799282	0.155474290251732	0.257117778062820	0.143393695354462	0.267458707094193	0.286413520574570	0.204395294189453	0.218059718608856	0.277670234441757	0.205388680100441	0.256818264722824	0.257122844457626	0.258136451244354	0.229064941406250	0.185527518391609	0.163178682327271
1394	0.0103523684665561	0.128302350640297	0.0188562925904989	0.0579663440585136	0.0852380841970444	0.0365013219416142	0.0590305067598820	0.116107352077961	0.216233178973198	0.0495364218950272	0.0659816414117813	0.113580137491226	0.154200389981270	0.254968404769897	0.141527861356735	0.265489667654038	0.283912569284439	0.202757298946381	0.214691922068596	0.273225963115692	0.202865064144135	0.252909570932388	0.252822190523148	0.255674242973328	0.225767225027084	0.183285504579544	0.161390498280525
1396	0.0103210741654038	0.128314033150673	0.0188441146165133	0.0574501380324364	0.0850969552993774	0.0363199710845947	0.0586613342165947	0.115797400474548	0.215784952044487	0.0493783093988895	0.0654836744070053	0.112164936959744	0.152578428387642	0.252059519290924	0.139012888073921	0.263209849596024	0.280854284763336	0.200827509164810	0.210977941751480	0.268638640642166	0.200156375765800	0.248440667986870	0.248079761862755	0.253318130970001	0.222118109464645	0.180578798055649	0.159127473831177
1398	0.0102843344211578	0.128323942422867	0.0188183356076479	0.0569193363189697	0.0849287360906601	0.0361303165555000	0.0582581572234631	0.115297697484493	0.215263992547989	0.0491962134838104	0.0650035142898560	0.110712453722954	0.151089400053024	0.249255925416946	0.136807024478912	0.261599838733673	0.278193622827530	0.199803501367569	0.207978054881096	0.264759808778763	0.197980642318726	0.244146436452866	0.243539080023766	0.251210361719131	0.218458786606789	0.178095847368240	0.156723544001579
1400	0.0102315573021770	0.128401234745979	0.0187809001654387	0.0563899651169777	0.0847380086779594	0.0358747355639935	0.0578947216272354	0.115008883178234	0.215094745159149	0.0487783327698708	0.0645478889346123	0.109137490391731	0.149454519152641	0.245900437235832	0.134917587041855	0.259813159704208	0.275128960609436	0.198835730552673	0.204980701208115	0.260722637176514	0.195573955774307	0.239368498325348	0.238720357418060	0.249269753694534	0.214508995413780	0.175351232290268	0.153829798102379
1402	0.0101792477071285	0.128476575016975	0.0187323410063982	0.0558368712663651	0.0845683366060257	0.0356173999607563	0.0574736781418324	0.114681750535965	0.214979693293571	0.0483507700264454	0.0641465708613396	0.107536509633064	0.148035675287247	0.242727160453796	0.133266583085060	0.258202403783798	0.272488445043564	0.197805196046829	0.202076151967049	0.256935924291611	0.193398877978325	0.234552830457687	0.233919546008110	0.247542053461075	0.210828647017479	0.172829598188400	0.151028737425804
1404	0.0102182598784566	0.128539577126503	0.0187512170523405	0.0553631484508514	0.0845119729638100	0.0355729535222054	0.0572890564799309	0.114464469254017	0.214860126376152	0.0481385104358196	0.0638505890965462	0.106235891580582	0.146652430295944	0.240033641457558	0.131397843360901	0.255958259105682	0.269375890493393	0.196054071187973	0.198755249381065	0.252737760543823	0.190748199820519	0.229300409555435	0.228590995073318	0.245646342635155	0.207180202007294	0.170238003134727	0.148471444845200
1406	0.0102893523871899	0.128665015101433	0.0188131984323263	0.0548706278204918	0.0844682231545448	0.0355698727071285	0.0571451038122177	0.114163950085640	0.214658126235008	0.0479450672864914	0.0635949969291687	0.104999445378780	0.145458221435547	0.237937256693840	0.129855692386627	0.254488468170166	0.267047137022018	0.194942101836205	0.196572795510292	0.249544143676758	0.188875064253807	0.225399628281593	0.224420443177223	0.244012594223022	0.204306855797768	0.168155834078789	0.146277084946632
1408	0.0103263799101114	0.128988549113274	0.0189022086560726	0.0546169616281986	0.0846048742532730	0.0355758778750896	0.0571062490344048	0.114106580615044	0.214831545948982	0.0478006228804588	0.0635848715901375	0.104400008916855	0.144948914647102	0.236565530300140	0.129018381237984	0.253230035305023	0.264877080917358	0.193957313895226	0.194690749049187	0.246624872088432	0.187128201127052	0.221934631466866	0.220801949501038	0.242617011070251	0.201916515827179	0.166868910193443	0.144690036773682
1410	0.0103757949545980	0.129505828022957	0.0190499313175678	0.0544352680444717	0.0848571434617043	0.0355897471308708	0.0570958778262138	0.114271156489849	0.215374529361725	0.0476532988250256	0.0636159107089043	0.103929407894611	0.144576162099838	0.235284000635147	0.128409758210182	0.252468228340149	0.263427734375000	0.193451240658760	0.193731278181076	0.244919508695602	0.186169728636742	0.219501376152039	0.218368142843246	0.241869404911995	0.200056061148644	0.165848076343536	0.143378123641014
1412	0.0103992605581880	0.129670962691307	0.0190821383148432	0.0543785355985165	0.0849243700504303	0.0355844721198082	0.0570919513702393	0.114362493157387	0.215552404522896	0.0475973524153233	0.0635602474212647	0.103582866489887	0.144203916192055	0.234406635165215	0.128070712089539	0.251895368099213	0.262151420116425	0.193113476037979	0.193232953548431	0.243692398071289	0.185632005333900	0.217452406883240	0.216331049799919	0.241215214133263	0.198331952095032	0.165077015757561	0.142475083470345
1414	0.0104127479717135	0.129730746150017	0.0190418213605881	0.0543174371123314	0.0849485546350479	0.0355591066181660	0.0570779591798782	0.114302352070808	0.215597227215767	0.0475630499422550	0.0634444132447243	0.103150330483913	0.143819868564606	0.233617052435875	0.127859428524971	0.251533120870590	0.261359393596649	0.192928165197372	0.192851006984711	0.242987006902695	0.185269132256508	0.216246947646141	0.215164765715599	0.240916192531586	0.197221308946610	0.164360120892525	0.141609728336334
1416	0.0104161091148853	0.129834786057472	0.0190239045768976	0.0542806945741177	0.0850463584065437	0.0355522595345974	0.0571028068661690	0.114281982183456	0.215818941593170	0.0475249737501144	0.0634345337748528	0.103007614612579	0.143948957324028	0.233522251248360	0.128106385469437	0.251200020313263	0.260952889919281	0.192789167165756	0.192516773939133	0.242290213704109	0.184868857264519	0.215226456522942	0.214359417557716	0.240745410323143	0.196855753660202	0.164226114749908	0.141365066170692
1418	0.0104235420003533	0.130106225609779	0.0190301612019539	0.0542899742722511	0.0852497518062592	0.0355686545372009	0.0571651272475719	0.114446081221104	0.216362476348877	0.0475392378866673	0.0635130777955055	0.102989718317986	0.144297719001770	0.233736947178841	0.128550499677658	0.250922411680222	0.260722279548645	0.192735731601715	0.192492395639420	0.242071747779846	0.184716209769249	0.214618444442749	0.213949784636498	0.240563169121742	0.196746811270714	0.164292514324188	0.141313046216965
1420	0.0104659795761108	0.130344823002815	0.0190933514386415	0.0544062107801437	0.0854090377688408	0.0356532707810402	0.0572618320584297	0.114630632102489	0.216705933213234	0.0476894229650497	0.0636145174503326	0.103141255676746	0.144468247890472	0.234119474887848	0.129091605544090	0.251018464565277	0.260796338319778	0.192965775728226	0.193334460258484	0.243154138326645	0.185099661350250	0.214606299996376	0.214178591966629	0.240521430969238	0.196925222873688	0.164624407887459	0.141383603215218
1422	0.0105728683993220	0.130699381232262	0.0192995872348547	0.0547011978924274	0.0857010856270790	0.0358522944152355	0.0574961490929127	0.114951021969318	0.217162311077118	0.0479431189596653	0.0638186037540436	0.103481605648994	0.144668847322464	0.234718263149261	0.130012899637222	0.251213550567627	0.260948777198792	0.193201690912247	0.194369375705719	0.244001910090446	0.185522496700287	0.214731603860855	0.214543998241425	0.240718111395836	0.197169795632362	0.165178671479225	0.141604423522949
1424	0.0105642201378942	0.130832031369209	0.0193653311580420	0.0547648295760155	0.0857991650700569	0.0358540043234825	0.0575620941817761	0.115109279751778	0.217335805296898	0.0479271560907364	0.0638976767659187	0.103615544736385	0.144868552684784	0.235043466091156	0.130471378564835	0.251594007015228	0.261081159114838	0.193433612585068	0.195382267236710	0.244570091366768	0.185994386672974	0.215098083019257	0.215120479464531	0.241013363003731	0.197227403521538	0.165317699313164	0.141746208071709
1426	0.0103632118552923	0.130799710750580	0.0191883612424135	0.0545956119894981	0.0856447815895081	0.0356421470642090	0.0573423951864243	0.114967100322247	0.217248842120171	0.0476502105593681	0.0638864710927010	0.103649504482746	0.145147368311882	0.235468268394470	0.130896076560020	0.251972973346710	0.261190831661224	0.193631902337074	0.196270331740379	0.245171114802361	0.186347067356110	0.215500399470329	0.215631529688835	0.241192027926445	0.197308912873268	0.165352955460548	0.141893714666367
1428	0.0102386884391308	0.130784898996353	0.0190700851380825	0.0545273311436176	0.0855484083294869	0.0355337671935558	0.0572134181857109	0.114867135882378	0.217261642217636	0.0475513897836208	0.0638836696743965	0.103697784245014	0.145303279161453	0.235704377293587	0.131273403763771	0.252019464969635	0.261364102363586	0.193729147315025	0.197083324193954	0.245875716209412	0.186539888381958	0.215686514973640	0.215962633490562	0.241307824850082	0.197420090436935	0.165488615632057	0.141916498541832
1430	0.0101982932537794	0.130828067660332	0.0190606079995632	0.0545424595475197	0.0855902060866356	0.0354952923953533	0.0572192482650280	0.114890433847904	0.217473655939102	0.0476057603955269	0.0639388039708138	0.103809520602226	0.145495578646660	0.235914617776871	0.131911620497704	0.252110213041306	0.261547744274139	0.193852335214615	0.197906434535980	0.246535390615463	0.186797350645065	0.215827569365501	0.216372787952423	0.241363063454628	0.197524383664131	0.165791600942612	0.141880333423615
1432	0.0102043431252241	0.130864366889000	0.0190782323479652	0.0545548833906651	0.0856731683015823	0.0354974046349525	0.0572203584015369	0.114921972155571	0.217586055397987	0.0476194657385349	0.0639745146036148	0.103855170309544	0.145572751760483	0.236011192202568	0.132243558764458	0.252450138330460	0.261750102043152	0.194305732846260	0.198597788810730	0.247016578912735	0.187170952558517	0.216072753071785	0.216946840286255	0.241543501615524	0.197536006569862	0.165906712412834	0.141847863793373
1434	0.0102907838299870	0.130916118621826	0.0191519055515528	0.0546708256006241	0.0857490301132202	0.0355328172445297	0.0571954697370529	0.114943176507950	0.217505812644959	0.0475765168666840	0.0639845207333565	0.103827849030495	0.145628318190575	0.235943108797073	0.132424473762512	0.252860218286514	0.261960327625275	0.194737583398819	0.199215143918991	0.247392654418945	0.187572360038757	0.216264903545380	0.217461064457893	0.241719081997871	0.197501942515373	0.165905341506004	0.141732990741730
1436	0.0103578865528107	0.130958601832390	0.0192235726863146	0.0547798275947571	0.0857756510376930	0.0355750359594822	0.0571612864732742	0.114960215985775	0.217451781034470	0.0475774370133877	0.0639834478497505	0.103778310120106	0.145682245492935	0.235772863030434	0.132401794195175	0.252557545900345	0.261596530675888	0.194268986582756	0.198730990290642	0.246760681271553	0.187388882040977	0.215669780969620	0.216938167810440	0.241697937250137	0.197404801845551	0.165846958756447	0.141636118292809
1438	0.0103876916691661	0.130944564938545	0.0192847847938538	0.0547886900603771	0.0857753306627274	0.0356753505766392	0.0571092814207077	0.115006946027279	0.217368975281715	0.0476130805909634	0.0640213117003441	0.103660143911839	0.145637646317482	0.235392346978188	0.132054761052132	0.251969903707504	0.260972559452057	0.193574890494347	0.197847187519074	0.245804220438004	0.186896190047264	0.214852616190910	0.216069877147675	0.241632059216499	0.197232991456985	0.165685236454010	0.141539514064789
1440	0.0103919375687838	0.130910232663155	0.0193273089826107	0.0547790266573429	0.0857924818992615	0.0357385948300362	0.0570672154426575	0.115089394152164	0.217318952083588	0.0476155877113342	0.0640247613191605	0.103573605418205	0.145600423216820	0.235266014933586	0.131788820028305	0.251862525939941	0.260806232690811	0.193472295999527	0.197222560644150	0.245254486799240	0.186720818281174	0.214715629816055	0.215656563639641	0.241557180881500	0.197226852178574	0.165619686245918	0.141484990715981
1442	0.0103326747193933	0.130884170532227	0.0192770846188068	0.0547377318143845	0.0858004540205002	0.0356275476515293	0.0569734908640385	0.115120261907578	0.217498481273651	0.0476516075432301	0.0639045387506485	0.103478714823723	0.145603165030479	0.235597610473633	0.131431430578232	0.251900881528854	0.260712713003159	0.193439289927483	0.196445614099503	0.244781374931335	0.186604902148247	0.214737385511398	0.215281710028648	0.241508379578590	0.197346106171608	0.165693446993828	0.141293615102768
1444	0.0102691072970629	0.130838319659233	0.0192008540034294	0.0546808280050755	0.0857498869299889	0.0354915484786034	0.0568516589701176	0.115109719336033	0.217610806226730	0.0476839281618595	0.0638170763850212	0.103403344750404	0.145571127533913	0.235864207148552	0.131211191415787	0.251960784196854	0.260714828968048	0.193450927734375	0.196280792355537	0.244635939598084	0.186807155609131	0.215099915862083	0.215164124965668	0.241490557789803	0.197358027100563	0.165744811296463	0.141057178378105
1446	0.0101976888254285	0.130541250109673	0.0191395170986652	0.0546067208051682	0.0855318680405617	0.0354273170232773	0.0567416623234749	0.115040622651577	0.217255204916000	0.0475929602980614	0.0637269690632820	0.103282712399960	0.145553797483444	0.235821723937988	0.131054714322090	0.252112567424774	0.260787785053253	0.193543210625649	0.196387901902199	0.244599312543869	0.187223315238953	0.215691015124321	0.215206012129784	0.241490826010704	0.197369471192360	0.165641471743584	0.140955403447151
1448	0.0101335169747472	0.130210712552071	0.0190858654677868	0.0545184388756752	0.0853243321180344	0.0353977084159851	0.0566428713500500	0.114965602755547	0.216845095157623	0.0475021228194237	0.0636346042156220	0.103175863623619	0.145629361271858	0.235752701759338	0.130919188261032	0.252069145441055	0.260776132345200	0.193416610360146	0.196168154478073	0.244644239544868	0.187124982476234	0.215794116258621	0.215321809053421	0.241569548845291	0.197509646415710	0.165579035878181	0.140951558947563
1450	0.0101717971265316	0.130076184868813	0.0191054511815310	0.0545826740562916	0.0853233262896538	0.0354117862880230	0.0565654709935188	0.114994272589684	0.216796278953552	0.0474614910781384	0.0636215433478355	0.103261746466160	0.145598381757736	0.236167058348656	0.130875393748283	0.251766204833984	0.260738134384155	0.193058386445045	0.195575043559074	0.244585543870926	0.186784699559212	0.215785920619965	0.215539902448654	0.241523340344429	0.197724103927612	0.165650650858879	0.141022488474846
1452	0.0102400835603476	0.129987329244614	0.0191517267376184	0.0546916089951992	0.0853852182626724	0.0354689955711365	0.0564881712198257	0.115083955228329	0.216812774538994	0.0474559590220451	0.0636502280831337	0.103384599089623	0.145540729165077	0.236504659056664	0.130935400724411	0.251710861921310	0.260927319526672	0.192984014749527	0.195327848196030	0.244609713554382	0.186813428997993	0.216059908270836	0.215706437826157	0.241189628839493	0.197931155562401	0.165684252977371	0.141137599945068
1454	0.0103733874857426	0.130094289779663	0.0192444995045662	0.0548182576894760	0.0855237841606140	0.0356649719178677	0.0566628240048885	0.115192271769047	0.216859698295593	0.0476240068674088	0.0638276487588882	0.103476002812386	0.145839765667915	0.236526861786842	0.131102204322815	0.252005338668823	0.261373162269592	0.193042159080505	0.195228815078735	0.244719833135605	0.186995670199394	0.216601446270943	0.216033339500427	0.240885213017464	0.198188617825508	0.165744125843048	0.141401320695877
1456	0.0105486819520593	0.130266427993774	0.0193837024271488	0.0549433901906014	0.0856468230485916	0.0358631722629070	0.0569311045110226	0.115345098078251	0.216921493411064	0.0478287227451801	0.0639739036560059	0.103495828807354	0.146044775843620	0.236534059047699	0.131119713187218	0.251759767532349	0.261127531528473	0.192608818411827	0.194625601172447	0.243907615542412	0.186594754457474	0.216317355632782	0.215784087777138	0.240620911121368	0.198032945394516	0.165708661079407	0.141535267233849
1458	0.0104868458583951	0.130065962672234	0.0193203222006559	0.0547845140099525	0.0854792892932892	0.0357421003282070	0.0567866638302803	0.115246161818504	0.216721802949905	0.0477436967194080	0.0637247413396835	0.103158108890057	0.145503953099251	0.236212462186813	0.130392193794251	0.250389933586121	0.259853154420853	0.191420868039131	0.192922204732895	0.241795018315315	0.185458585619926	0.215139657258987	0.214583337306976	0.239971756935120	0.197407364845276	0.165046676993370	0.141131609678268
1460	0.0103378864005208	0.129683300852776	0.0191242732107639	0.0545108094811440	0.0852582603693008	0.0355279408395290	0.0564198829233646	0.114913590252399	0.216328114271164	0.0475738309323788	0.0633847266435623	0.102691724896431	0.144908159971237	0.235829770565033	0.129609644412994	0.249640867114067	0.259159207344055	0.190714985132217	0.191718190908432	0.240606814622879	0.184733659029007	0.214642494916916	0.213701903820038	0.239052936434746	0.197153940796852	0.164429873228073	0.140690341591835
1462	0.0103355320170522	0.129696175456047	0.0190941952168942	0.0544927828013897	0.0852551609277725	0.0355315282940865	0.0563009232282639	0.114831052720547	0.216180086135864	0.0476253964006901	0.0634210631251335	0.102561034262180	0.144754931330681	0.235809847712517	0.129064843058586	0.249081879854202	0.258745551109314	0.190028980374336	0.190536051988602	0.239545494318008	0.183886796236038	0.214358448982239	0.212854444980621	0.238138496875763	0.197191774845123	0.164261430501938	0.140585541725159
1464	0.0103655140846968	0.129817783832550	0.0191569384187460	0.0545576401054859	0.0852655321359634	0.0355884730815887	0.0562577098608017	0.114910945296288	0.216054230928421	0.0477133728563786	0.0635220557451248	0.102508448064327	0.144606962800026	0.235893532633781	0.128578871488571	0.248717024922371	0.258638262748718	0.189734071493149	0.189912512898445	0.239083096385002	0.183504074811935	0.214379549026489	0.212607428431511	0.237610921263695	0.196987956762314	0.164060235023499	0.140450343489647
1466	0.0102853393182158	0.129502713680267	0.0191152840852737	0.0544856898486614	0.0850292220711708	0.0354528687894344	0.0561613850295544	0.114817209541798	0.215674623847008	0.0474917404353619	0.0632952749729157	0.102256245911121	0.144134491682053	0.235771968960762	0.128161817789078	0.248661532998085	0.258778423070908	0.189567953348160	0.189294978976250	0.238925457000732	0.183282658457756	0.214835971593857	0.212865024805069	0.237172186374664	0.196432977914810	0.163581475615501	0.140125334262848
1468	0.0101195937022567	0.128816992044449	0.0189332775771618	0.0542774088680744	0.0845411494374275	0.0351734980940819	0.0559362508356571	0.114444300532341	0.214855894446373	0.0471225045621395	0.0629024803638458	0.101751819252968	0.143590703606606	0.235556289553642	0.127721443772316	0.248698264360428	0.258979827165604	0.189458414912224	0.189039245247841	0.238910645246506	0.183090046048164	0.215414553880692	0.213277786970139	0.237023085355759	0.196135565638542	0.163089394569397	0.139740675687790
1470	0.0100399330258369	0.128508225083351	0.0188222862780094	0.0541965924203396	0.0842758864164352	0.0350094363093376	0.0558051392436028	0.114193394780159	0.214462548494339	0.0470215082168579	0.0627032071352005	0.101561196148396	0.143512576818466	0.235806360840797	0.127701297402382	0.248742029070854	0.259592771530151	0.189287468791008	0.188998132944107	0.239024251699448	0.182910159230232	0.216534540057182	0.214109301567078	0.236893296241760	0.196404516696930	0.163037955760956	0.139833360910416
1472	0.00996931921690702	0.128278300166130	0.0187133271247149	0.0541407279670239	0.0840727388858795	0.0348649211227894	0.0557182617485523	0.113964803516865	0.214142665266991	0.0469582006335259	0.0625432953238487	0.101547941565514	0.143526732921600	0.236343801021576	0.127786859869957	0.248859480023384	0.260150015354157	0.189261451363564	0.189042165875435	0.239315360784531	0.183010086417198	0.217613622546196	0.214892730116844	0.236777693033218	0.196906626224518	0.163169518113136	0.140126064419746
1474	0.00995011255145073	0.128192603588104	0.0186892356723547	0.0541166216135025	0.0841054171323776	0.0348008908331394	0.0556835457682610	0.113883711397648	0.214051917195320	0.0470092520117760	0.0625253543257713	0.101800665259361	0.143734991550446	0.236964762210846	0.128071963787079	0.249186381697655	0.261161893606186	0.189526289701462	0.189533263444901	0.240125775337219	0.183604568243027	0.219180181622505	0.216293051838875	0.236882671713829	0.197788789868355	0.163583680987358	0.140546768903732
1476	0.00994483288377523	0.128083512187004	0.0187169164419174	0.0541516020894051	0.0842383354902268	0.0347482822835445	0.0556479543447495	0.113835066556931	0.214002579450607	0.0471780002117157	0.0625189691781998	0.102284163236618	0.144068330526352	0.237745389342308	0.128463521599770	0.249342128634453	0.261814177036285	0.189670503139496	0.190026879310608	0.240870326757431	0.184035196900368	0.220036104321480	0.217267394065857	0.237104013562202	0.198462292551994	0.164122670888901	0.141143694519997
1478	0.00997683871537447	0.127998307347298	0.0187379829585552	0.0542322807013989	0.0841919109225273	0.0347581543028355	0.0556766726076603	0.113782942295074	0.213910385966301	0.0472183749079704	0.0625349879264832	0.102401092648506	0.144209504127502	0.237667441368103	0.128610000014305	0.249285921454430	0.261946856975555	0.189570546150208	0.190571919083595	0.241909697651863	0.184536620974541	0.220696732401848	0.217994138598442	0.237232372164726	0.198593914508820	0.164245963096619	0.141261368989944
1480	0.0100629841908813	0.127959609031677	0.0187905225902796	0.0544105991721153	0.0840427726507187	0.0348233990371227	0.0557766295969486	0.113697513937950	0.213726684451103	0.0471568591892719	0.0625938177108765	0.102362751960754	0.144318044185638	0.237299799919128	0.128752961754799	0.249125167727470	0.261846065521240	0.189428448677063	0.190753534436226	0.242165535688400	0.184681653976440	0.220762521028519	0.218102395534515	0.236988887190819	0.198467001318932	0.164229363203049	0.141208201646805
1482	0.0100761856883764	0.127893581986427	0.0188201721757650	0.0544075369834900	0.0840164199471474	0.0347879827022553	0.0557513907551765	0.113589428365231	0.213583022356033	0.0470571070909500	0.0625559538602829	0.102140180766582	0.144236683845520	0.236948177218437	0.128753855824471	0.248435482382774	0.261027187108994	0.189039811491966	0.190426930785179	0.241435974836350	0.184054762125015	0.219585150480270	0.217070817947388	0.236457899212837	0.197836473584175	0.163918301463127	0.140832856297493
1484	0.0100327711552382	0.127697631716728	0.0187989342957735	0.0541583448648453	0.0839835256338120	0.0346411466598511	0.0555776357650757	0.113296367228031	0.213438287377357	0.0469076745212078	0.0624350830912590	0.101624108850956	0.144000262022018	0.236306279897690	0.128677234053612	0.247730955481529	0.260098367929459	0.188663974404335	0.190179392695427	0.240595370531082	0.183546423912048	0.218188732862473	0.215964749455452	0.235945999622345	0.197089433670044	0.163349434733391	0.140061676502228
1486	0.0100106187164783	0.127638220787048	0.0187723655253649	0.0539891086518765	0.0839330404996872	0.0345675013959408	0.0555086508393288	0.113107420504093	0.213303193449974	0.0468212813138962	0.0623878985643387	0.101311363279819	0.143766462802887	0.235627695918083	0.128618597984314	0.246760532259941	0.258596897125244	0.187957346439362	0.189973637461662	0.239285230636597	0.183092445135117	0.216051220893860	0.214065313339233	0.235352456569672	0.196240678429604	0.163002088665962	0.139553517103195
1488	0.0100107304751873	0.127658590674400	0.0187478940933943	0.0538753867149353	0.0838443934917450	0.0345163233578205	0.0555128529667854	0.112991780042648	0.212947264313698	0.0466626919806004	0.0623309127986431	0.100932955741882	0.143432557582855	0.234499841928482	0.128619357943535	0.245992064476013	0.257304579019547	0.187429890036583	0.189820900559425	0.238329082727432	0.182696357369423	0.214394226670265	0.212393060326576	0.234999299049377	0.195191934704781	0.162558495998383	0.138989642262459
1490	0.00998614914715290	0.127536833286285	0.0187206622213125	0.0538018420338631	0.0837014913558960	0.0344375148415566	0.0554696768522263	0.112865738570690	0.212683841586113	0.0464994125068188	0.0622679032385349	0.100620098412037	0.143239989876747	0.233763307332993	0.128615155816078	0.245281353592873	0.256316691637039	0.186996415257454	0.189628541469574	0.237172245979309	0.182060837745667	0.212705612182617	0.210843682289124	0.234561726450920	0.194251671433449	0.162114888429642	0.138576775789261
1492	0.00989523343741894	0.127197638154030	0.0186453312635422	0.0536516718566418	0.0834164991974831	0.0342827327549458	0.0552585273981094	0.112598530948162	0.212348520755768	0.0462470352649689	0.0621595457196236	0.100168064236641	0.143086299300194	0.232778340578079	0.128635123372078	0.244774654507637	0.255608022212982	0.186771437525749	0.189632758498192	0.236595422029495	0.181714460253716	0.211663395166397	0.209931120276451	0.234114781022072	0.193557411432266	0.161564037203789	0.138035178184509
1494	0.00988916773349047	0.127021506428719	0.0186139289289713	0.0536327809095383	0.0833280757069588	0.0342606268823147	0.0551453493535519	0.112403981387615	0.212154105305672	0.0461608693003655	0.0621348619461060	0.100046999752522	0.143060281872749	0.232395291328430	0.128922119736671	0.244787320494652	0.255339890718460	0.186956509947777	0.190412476658821	0.237059518694878	0.182010516524315	0.211309805512428	0.209875747561455	0.233766257762909	0.193392872810364	0.161549001932144	0.137982487678528
1496	0.0100188469514251	0.126910015940666	0.0187000595033169	0.0536964982748032	0.0833583399653435	0.0343653671443462	0.0551988482475281	0.112261295318604	0.212047234177589	0.0461756251752377	0.0621911883354187	0.100096635520458	0.143049985170364	0.232403948903084	0.129479244351387	0.244900956749916	0.255332350730896	0.187222421169281	0.191236928105354	0.237720042467117	0.182347789406776	0.211209639906883	0.210170000791550	0.233753010630608	0.193404078483582	0.161844328045845	0.138270914554596
1498	0.0100464122369885	0.126771330833435	0.0187321770936251	0.0536589100956917	0.0833141133189201	0.0343535766005516	0.0552052706480026	0.112122610211372	0.211910590529442	0.0461231470108032	0.0621928647160530	0.100046567618847	0.143105417490006	0.232482537627220	0.129757896065712	0.245266839861870	0.255812287330627	0.187731862068176	0.192218333482742	0.238807708024979	0.182944700121880	0.211756661534309	0.210982829332352	0.234117284417152	0.193450808525085	0.162004858255386	0.138476014137268
1500	0.00986344739794731	0.126452192664146	0.0185573827475309	0.0534709282219410	0.0830798298120499	0.0341073647141457	0.0549906902015209	0.111804082989693	0.211539149284363	0.0459027886390686	0.0621129348874092	0.0999090000987053	0.143251061439514	0.232485547661781	0.130038797855377	0.245659008622170	0.256352037191391	0.188152208924294	0.193201571702957	0.239673256874084	0.183523505926132	0.212473466992378	0.211660414934158	0.234753221273422	0.193649575114250	0.162203803658485	0.138756766915321
1502	0.00974402949213982	0.126323297619820	0.0184276122599840	0.0533962100744247	0.0829696506261826	0.0339871384203434	0.0548903644084930	0.111531890928745	0.211320951581001	0.0458530858159065	0.0621106885373592	0.0999442264437676	0.143459245562553	0.232879385352135	0.130474627017975	0.246181145310402	0.257055103778839	0.188404455780983	0.194498583674431	0.240426331758499	0.184350118041039	0.213439747691154	0.212321370840073	0.235841780900955	0.194266423583031	0.162650078535080	0.139117613434792
1504	0.00969536788761616	0.126381561160088	0.0184015873819590	0.0535169579088688	0.0829582363367081	0.0340291112661362	0.0550454296171665	0.111524187028408	0.211431041359901	0.0460542552173138	0.0622324980795383	0.100272335112095	0.144005492329597	0.234021812677383	0.131315127015114	0.246728822588921	0.257800698280335	0.188618391752243	0.195547208189964	0.241086691617966	0.185007020831108	0.214201822876930	0.213039159774780	0.236733764410019	0.195100054144859	0.163604229688644	0.139908626675606
1506	0.00970357470214367	0.126427903771400	0.0184297598898411	0.0536633543670177	0.0829898342490196	0.0340957790613174	0.0551933944225311	0.111610814929008	0.211591467261314	0.0462319403886795	0.0623794309794903	0.100555032491684	0.144416034221649	0.234788566827774	0.131826400756836	0.246909096837044	0.258343398571014	0.188923418521881	0.196245640516281	0.241964548826218	0.185122907161713	0.215065345168114	0.213781297206879	0.237505987286568	0.195965021848679	0.164236962795258	0.140552163124084
1508	0.00980965234339237	0.126492276787758	0.0185767449438572	0.0539606735110283	0.0832005292177200	0.0342406406998634	0.0553445331752300	0.111763626337051	0.211870729923248	0.0464160144329071	0.0626063048839569	0.100957982242107	0.144893839955330	0.235642924904823	0.132367864251137	0.247044235467911	0.258737742900848	0.189189761877060	0.196876004338264	0.242674022912979	0.185266137123108	0.215892389416695	0.214316427707672	0.237791717052460	0.196999311447144	0.165049940347672	0.141408950090408
1510	0.00985901057720184	0.126541778445244	0.0186649244278669	0.0541255585849285	0.0833233371376991	0.0343192145228386	0.0554351247847080	0.111879892647266	0.212024301290512	0.0465224236249924	0.0627162009477615	0.101226158440113	0.145174115896225	0.236234024167061	0.132637143135071	0.247396245598793	0.259198993444443	0.189280703663826	0.196855485439301	0.243412941694260	0.185750067234039	0.216876938939095	0.214983329176903	0.237926870584488	0.197818219661713	0.165526330471039	0.141923293471336
1512	0.00983367022126913	0.126642659306526	0.0186526644974947	0.0541868433356285	0.0833565816283226	0.0343245826661587	0.0553998202085495	0.111936137080193	0.211979225277901	0.0466177649796009	0.0628390982747078	0.101433970034122	0.145436674356461	0.236912608146667	0.132729828357697	0.247740462422371	0.259731501340866	0.189261347055435	0.196727126836777	0.244037225842476	0.186092346906662	0.217761665582657	0.215591177344322	0.237968742847443	0.198541507124901	0.166047751903534	0.142612636089325
1514	0.00979685131460428	0.126655191183090	0.0186240747570992	0.0542175173759460	0.0833324044942856	0.0343069471418858	0.0553002730011940	0.111966736614704	0.211875006556511	0.0466562323272228	0.0628671497106552	0.101417191326618	0.145439893007278	0.237121477723122	0.132539197802544	0.247911155223846	0.260212063789368	0.189282625913620	0.197014778852463	0.244154453277588	0.186212703585625	0.218687146902084	0.215979933738709	0.237824842333794	0.198948442935944	0.166164308786392	0.142878159880638
1516	0.00969261024147272	0.126391306519508	0.0184965040534735	0.0541564822196960	0.0831902697682381	0.0342223197221756	0.0551133714616299	0.111888602375984	0.211597517132759	0.0466628894209862	0.0626697391271591	0.101104579865932	0.145312577486038	0.237068608403206	0.132211342453957	0.248118817806244	0.260647118091583	0.189347624778748	0.197214171290398	0.244098871946335	0.186350837349892	0.219393253326416	0.216259449720383	0.237672507762909	0.199271067976952	0.166012734174728	0.142895027995110
1518	0.00962585862725973	0.126238331198692	0.0184050668030977	0.0540947616100311	0.0830959305167198	0.0341702178120613	0.0549928210675716	0.111794494092464	0.211422964930534	0.0466512106359005	0.0625119954347611	0.100922785699368	0.145303398370743	0.237115874886513	0.131997972726822	0.248148292303085	0.260969191789627	0.189186558127403	0.196777865290642	0.243951275944710	0.186368241906166	0.220133468508720	0.216478049755096	0.237485915422440	0.199616581201553	0.165863797068596	0.142890438437462
1520	0.00963852461427450	0.126298829913139	0.0184432957321405	0.0540847666561604	0.0830273479223251	0.0342041701078415	0.0549828261137009	0.111742764711380	0.211396902799606	0.0466629043221474	0.0623815245926380	0.100885622203350	0.145319864153862	0.237628564238548	0.131722033023834	0.248090028762817	0.261344343423843	0.189031586050987	0.196218386292458	0.243821054697037	0.186344325542450	0.220898076891899	0.216765046119690	0.237268880009651	0.200052902102470	0.165718078613281	0.142876222729683
1522	0.00967773422598839	0.126364141702652	0.0184875745326281	0.0541241280734539	0.0830037221312523	0.0342381820082665	0.0549791716039181	0.111672602593899	0.211363524198532	0.0467275679111481	0.0623119808733463	0.100919134914875	0.145260617136955	0.237941101193428	0.131528094410896	0.248276919126511	0.262079864740372	0.189137652516365	0.195700675249100	0.244071602821350	0.186409220099449	0.221756756305695	0.217489823698998	0.236875474452972	0.200287058949471	0.165672987699509	0.142805144190788
1524	0.00981067866086960	0.126361683011055	0.0185432340949774	0.0542243979871273	0.0830369368195534	0.0342789106070995	0.0549338310956955	0.111807905137539	0.211260363459587	0.0468768663704395	0.0622203126549721	0.101028710603714	0.145172491669655	0.238131955265999	0.131134063005447	0.248536825180054	0.262806743383408	0.189226165413857	0.195168688893318	0.244410157203674	0.186447158455849	0.222396433353424	0.218133002519608	0.236589893698692	0.200377851724625	0.165662094950676	0.142790690064430
1526	0.00987254548817873	0.126303076744080	0.0185772068798542	0.0542719550430775	0.0830126404762268	0.0342766605317593	0.0548973307013512	0.112010769546032	0.211202219128609	0.0469130836427212	0.0621098875999451	0.101051658391953	0.145129561424255	0.238128602504730	0.130853235721588	0.248338177800179	0.263013720512390	0.189088433980942	0.194533973932266	0.244348570704460	0.186507254838943	0.222987219691277	0.218368843197823	0.236351311206818	0.200383141636848	0.165637359023094	0.142777428030968
1528	0.00976288877427578	0.126248359680176	0.0184628982096910	0.0542105697095394	0.0829913318157196	0.0341549217700958	0.0547897666692734	0.111938163638115	0.211113587021828	0.0467295534908772	0.0620051175355911	0.101009145379066	0.145006373524666	0.237898677587509	0.130623355507851	0.248088821768761	0.262962758541107	0.188904061913490	0.193916618824005	0.244006067514420	0.186534121632576	0.223440170288086	0.218453794717789	0.235987231135368	0.200440704822540	0.165551349520683	0.142624482512474
1530	0.00967242568731308	0.126283928751946	0.0183628275990486	0.0541852414608002	0.0830293223261833	0.0340937823057175	0.0546854808926582	0.111816160380840	0.211083561182022	0.0466804951429367	0.0619695521891117	0.101060442626476	0.144966304302216	0.237872391939163	0.130491480231285	0.248020291328430	0.263069003820419	0.188691124320030	0.193307861685753	0.243396833539009	0.186602309346199	0.223629236221313	0.218701526522636	0.235460281372070	0.200565487146378	0.165456876158714	0.142528727650642
1532	0.00964658986777067	0.126417562365532	0.0184153821319342	0.0542313642799854	0.0830953791737557	0.0341127701103687	0.0547040775418282	0.111827380955219	0.211256787180901	0.0468323603272438	0.0619452744722366	0.101212412118912	0.144951120018959	0.238074496388435	0.130317747592926	0.247896686196327	0.263230264186859	0.188456535339355	0.192770838737488	0.242926508188248	0.186627984046936	0.223703727126122	0.218947485089302	0.235130667686462	0.200609877705574	0.165275767445564	0.142470583319664
1534	0.00964256748557091	0.126454815268517	0.0184611137956381	0.0542415715754032	0.0830922126770020	0.0341053828597069	0.0547029450535774	0.111826062202454	0.211327269673347	0.0468444563448429	0.0619370639324188	0.101218678057194	0.144806563854218	0.237977191805840	0.130144119262695	0.247500449419022	0.262689769268036	0.188165679574013	0.192264318466187	0.242197871208191	0.186228021979332	0.223169595003128	0.218573108315468	0.234613940119743	0.200250804424286	0.165146037936211	0.142456397414207
1536	0.00962019618600607	0.126316845417023	0.0183836538344622	0.0541000850498676	0.0829744338989258	0.0340078361332417	0.0545315705239773	0.111639648675919	0.211044520139694	0.0466714166104794	0.0619640611112118	0.100925453007221	0.144447937607765	0.237532407045364	0.129753157496452	0.247068673372269	0.262035161256790	0.187929272651672	0.191760450601578	0.241554409265518	0.185841336846352	0.222501754760742	0.218050554394722	0.233885273337364	0.199589103460312	0.164919674396515	0.142144978046417
1538	0.00960818491876125	0.126231789588928	0.0183112695813179	0.0540142767131329	0.0828837230801582	0.0339474156498909	0.0543799251317978	0.111444421112537	0.210863754153252	0.0465982817113400	0.0619886964559555	0.100677430629730	0.144286811351776	0.237130850553513	0.129583001136780	0.246886655688286	0.261794269084930	0.187943920493126	0.191657558083534	0.241418883204460	0.185662329196930	0.221598267555237	0.217422500252724	0.233007401227951	0.199034675955772	0.164683505892754	0.141768142580986
1540	0.00965829193592072	0.126207217574120	0.0183499660342932	0.0540929436683655	0.0828177481889725	0.0339690670371056	0.0543950758874416	0.111443571746349	0.210866332054138	0.0466490983963013	0.0620772168040276	0.100458599627018	0.144246578216553	0.236491873860359	0.129686236381531	0.246718555688858	0.261614352464676	0.188038870692253	0.191751331090927	0.241299718618393	0.185610786080360	0.220885813236237	0.216886758804321	0.232659444212914	0.198431402444839	0.164298191666603	0.141299456357956
1542	0.00967032276093960	0.126148000359535	0.0183755345642567	0.0540862120687962	0.0827175304293633	0.0339582189917564	0.0543729476630688	0.111395142972469	0.210795104503632	0.0465980917215347	0.0620129518210888	0.100291661918163	0.144117325544357	0.236014842987061	0.129671022295952	0.246673315763474	0.261579960584641	0.188019156455994	0.192318663001060	0.241013020277023	0.185724854469299	0.220364362001419	0.216753572225571	0.232729196548462	0.197701811790466	0.164034262299538	0.140964895486832
1544	0.00954983383417130	0.125891774892807	0.0182683281600475	0.0537839084863663	0.0824292898178101	0.0337066166102886	0.0540818423032761	0.110982634127140	0.210351243615150	0.0462782122194767	0.0615229234099388	0.100075393915176	0.143598720431328	0.235218897461891	0.129379346966743	0.246579661965370	0.261467844247818	0.187887519598007	0.192771941423416	0.240770623087883	0.185791686177254	0.219824880361557	0.216668203473091	0.233002007007599	0.196973964571953	0.163549229502678	0.140267357230186
1546	0.00948492251336575	0.125709071755409	0.0181929096579552	0.0536241978406906	0.0822781100869179	0.0335743725299835	0.0538944751024246	0.110601402819157	0.210018649697304	0.0461247898638248	0.0613016635179520	0.0999731644988060	0.143404409289360	0.234789967536926	0.129280477762222	0.246170893311501	0.260834276676178	0.187606722116470	0.192578703165054	0.240409776568413	0.185745432972908	0.218918398022652	0.216145873069763	0.233239203691483	0.196876823902130	0.163407415151596	0.140001818537712
1548	0.00956557039171457	0.125743404030800	0.0182994920760393	0.0537623353302479	0.0823997482657433	0.0337289124727249	0.0540387965738773	0.110728748142719	0.210030898451805	0.0462668463587761	0.0615834854543209	0.100023873150349	0.143621876835823	0.234651669859886	0.129304870963097	0.245744347572327	0.260149240493774	0.187315523624420	0.192220807075501	0.239842772483826	0.185594692826271	0.218083620071411	0.215516239404678	0.232937157154083	0.197010233998299	0.163602948188782	0.140192583203316
1550	0.00963183492422104	0.125861555337906	0.0183968953788281	0.0538596175611019	0.0825273767113686	0.0338238067924976	0.0541607663035393	0.110886037349701	0.210098654031754	0.0463713034987450	0.0617439709603787	0.100057147443295	0.143735185265541	0.234636217355728	0.129209384322166	0.245084434747696	0.259162157773972	0.186528772115707	0.191281571984291	0.238623782992363	0.184899896383286	0.217306047677994	0.214774340391159	0.232028633356094	0.197170153260231	0.163715302944183	0.140243843197823
1552	0.00965921767055988	0.126225948333740	0.0184193681925535	0.0539101995527744	0.0826845318078995	0.0338151454925537	0.0541965402662754	0.110971733927727	0.210303321480751	0.0463869422674179	0.0617471374571323	0.100074067711830	0.143701776862144	0.234630838036537	0.129103407263756	0.244344696402550	0.258148699998856	0.185819357633591	0.190301045775414	0.237499266862869	0.184244841337204	0.216654807329178	0.214063048362732	0.231273546814919	0.197172835469246	0.163768768310547	0.140132188796997
1554	0.00969242863357067	0.126462578773499	0.0184664502739906	0.0539581552147865	0.0827539190649986	0.0338379628956318	0.0542306602001190	0.111040391027927	0.210394963622093	0.0464196018874645	0.0617268495261669	0.100070223212242	0.143481925129890	0.234342694282532	0.128885567188263	0.243645161390305	0.257389456033707	0.185375154018402	0.189296260476112	0.236862331628799	0.183797702193260	0.215692907571793	0.213334232568741	0.230596616864204	0.196629926562309	0.163534194231033	0.139937460422516
1556	0.00980353448539972	0.126486793160439	0.0186431072652340	0.0540204457938671	0.0827860385179520	0.0339897871017456	0.0542794466018677	0.110955268144608	0.210195317864418	0.0465086437761784	0.0616561770439148	0.0998263880610466	0.143010988831520	0.233465000987053	0.128085523843765	0.242913514375687	0.256641060113907	0.184967800974846	0.188282385468483	0.236302137374878	0.183366566896439	0.214704200625420	0.212595030665398	0.230156540870667	0.195693328976631	0.162845417857170	0.139358103275299
1558	0.00984099879860878	0.126402005553246	0.0187362208962441	0.0539493821561337	0.0827507004141808	0.0340183302760124	0.0542620345950127	0.110805466771126	0.209975749254227	0.0464372746646404	0.0615005157887936	0.0993859618902206	0.142517432570457	0.232537686824799	0.127326786518097	0.242180407047272	0.255602747201920	0.184353843331337	0.187084972858429	0.234544187784195	0.182582095265389	0.213543221354485	0.211195498704910	0.229486495256424	0.194398209452629	0.162070766091347	0.138601273298264
1560	0.00968338828533888	0.126033753156662	0.0185340065509081	0.0535035878419876	0.0824703425168991	0.0336997658014298	0.0539391972124577	0.110377296805382	0.209419831633568	0.0460399277508259	0.0609777756035328	0.0984268635511398	0.141466543078423	0.230934530496597	0.126133590936661	0.241448521614075	0.254522174596787	0.183779463171959	0.186019167304039	0.232930779457092	0.181741580367088	0.212435886263847	0.209705293178558	0.228795245289803	0.192805498838425	0.160725817084312	0.137131929397583
1562	0.00957043655216694	0.125817909836769	0.0183710940182209	0.0532019212841988	0.0822442770004273	0.0334903597831726	0.0536927059292793	0.109956257045269	0.209005087614059	0.0457845740020275	0.0606546215713024	0.0977684631943703	0.140721529722214	0.229933306574821	0.125315666198730	0.240354567766190	0.253181189298630	0.183244660496712	0.184775888919830	0.231418848037720	0.180633336305618	0.210695877671242	0.207871168851852	0.227799788117409	0.191605016589165	0.159827500581741	0.136224761605263
1564	0.00952041801065207	0.125795111060143	0.0183668043464422	0.0530361309647560	0.0820574164390564	0.0333888009190559	0.0535328835248947	0.109746910631657	0.208825334906578	0.0456085726618767	0.0604389309883118	0.0971605330705643	0.140039116144180	0.228996261954308	0.124419532716274	0.239308774471283	0.251967549324036	0.182851880788803	0.183554589748383	0.229908704757690	0.179753914475441	0.209133520722389	0.206408798694611	0.226804241538048	0.190499112010002	0.158834204077721	0.135345399379730
1566	0.00949031859636307	0.125781193375587	0.0183766242116690	0.0529184900224209	0.0819722265005112	0.0333181768655777	0.0533826462924480	0.109550692141056	0.208720460534096	0.0454729534685612	0.0603380724787712	0.0968239083886147	0.139682725071907	0.228423431515694	0.123972147703171	0.238221153616905	0.250565677881241	0.182178586721420	0.182295009493828	0.228201344609261	0.178807735443115	0.207629173994064	0.205267265439034	0.225463941693306	0.189791381359100	0.158379495143890	0.134785041213036
1568	0.00948715489357710	0.125722721219063	0.0183412320911884	0.0528010837733746	0.0819798186421394	0.0332382582128048	0.0532627776265144	0.109341159462929	0.208686500787735	0.0452596135437489	0.0602099224925041	0.0967275202274323	0.139306411147118	0.227914690971375	0.123593807220459	0.237300753593445	0.249541342258453	0.181701272726059	0.181628525257111	0.227501228451729	0.178185597062111	0.206788346171379	0.204530119895935	0.224399417638779	0.189285501837730	0.158094763755798	0.134214445948601
1570	0.00947275571525097	0.125642046332359	0.0182996839284897	0.0527567267417908	0.0819636136293411	0.0331778414547443	0.0531728565692902	0.109158501029015	0.208634883165360	0.0451643243432045	0.0601290985941887	0.0966289490461350	0.139161631464958	0.227621942758560	0.123567499220371	0.237117245793343	0.249204233288765	0.181776985526085	0.181867271661758	0.227800607681274	0.178316831588745	0.206434056162834	0.204128488898277	0.223587334156036	0.189141094684601	0.158105731010437	0.134057745337486
1572	0.00939774140715599	0.125437274575233	0.0182402059435844	0.0527556613087654	0.0818818733096123	0.0331043899059296	0.0530229657888413	0.109088450670242	0.208338141441345	0.0451634041965008	0.0600903853774071	0.0966220647096634	0.139168873429298	0.227376714348793	0.123901143670082	0.237188965082169	0.249005034565926	0.182012945413589	0.182279691100121	0.228261992335320	0.178740188479424	0.206372976303101	0.204153299331665	0.223586589097977	0.189256414771080	0.158357009291649	0.134230092167854
1574	0.00935392826795578	0.125244840979576	0.0182062592357397	0.0527823381125927	0.0818139165639877	0.0330578275024891	0.0529508143663406	0.109005495905876	0.208119153976440	0.0451376959681511	0.0601240247488022	0.0967825129628182	0.139308303594589	0.227493911981583	0.124294169247150	0.237458303570747	0.248951390385628	0.182498306035995	0.183077380061150	0.229400008916855	0.179730653762817	0.207014754414558	0.205266967415810	0.224325165152550	0.189819470047951	0.158828914165497	0.134520500898361
1576	0.00935742165893316	0.124897159636021	0.0182268526405096	0.0528956018388271	0.0817126408219338	0.0330174863338470	0.0530955828726292	0.108871273696423	0.207910433411598	0.0450577698647976	0.0602613724768162	0.0971699655056000	0.139678210020065	0.228094249963760	0.124942198395729	0.237760394811630	0.249255120754242	0.182962849736214	0.183910623192787	0.230438083410263	0.180743053555489	0.207937985658646	0.206480801105499	0.225274011492729	0.190779954195023	0.159803763031960	0.135208800435066
1578	0.00936491228640080	0.124699361622334	0.0182310044765472	0.0530124530196190	0.0816292837262154	0.0329972207546234	0.0531840696930885	0.108748637139797	0.207788482308388	0.0450700707733631	0.0602838993072510	0.0974213629961014	0.140130132436752	0.228688567876816	0.125716045498848	0.238605037331581	0.250563919544220	0.183908209204674	0.185597479343414	0.231987282633781	0.182272195816040	0.209609448909760	0.208415150642395	0.226627245545387	0.192080214619637	0.160719111561775	0.135978192090988
1580	0.00934301037341356	0.124620370566845	0.0181622505187988	0.0532294102013111	0.0815407782793045	0.0329551659524441	0.0531327165663242	0.108651481568813	0.207647636532784	0.0451621599495411	0.0602888166904449	0.0978157818317413	0.140893414616585	0.229672268033028	0.127019941806793	0.239335745573044	0.251628786325455	0.184590607881546	0.187142372131348	0.233484700322151	0.183503940701485	0.210861667990685	0.210117563605309	0.227685973048210	0.193634331226349	0.162079125642777	0.137158587574959
1582	0.00932197645306587	0.124505065381527	0.0181144513189793	0.0534474514424801	0.0815471410751343	0.0329567641019821	0.0531202331185341	0.108582064509392	0.207547545433044	0.0452083684504032	0.0604222305119038	0.0982088372111321	0.141405850648880	0.230217993259430	0.127937257289886	0.240018770098686	0.252449333667755	0.185182452201843	0.188912913203239	0.235482782125473	0.184913486242294	0.212295070290566	0.212020486593246	0.228543698787689	0.195102125406265	0.163191676139832	0.138113841414452
1584	0.00931402668356895	0.124206036329269	0.0181213952600956	0.0537410303950310	0.0816003233194351	0.0330007337033749	0.0532182231545448	0.108547411859035	0.207521110773087	0.0452933609485626	0.0607402510941029	0.0988786444067955	0.142073750495911	0.230897516012192	0.128855764865875	0.240370094776154	0.252854257822037	0.185517773032188	0.190148189663887	0.237016350030899	0.185864418745041	0.213378310203552	0.213432222604752	0.228822603821754	0.196722000837326	0.164557844400406	0.139378249645233
1586	0.00933878496289253	0.124107278883457	0.0181376058608294	0.0539555735886097	0.0816367641091347	0.0330385789275169	0.0533622577786446	0.108563095331192	0.207481518387795	0.0453708805143833	0.0608909912407398	0.0993323177099228	0.142519816756248	0.231649979948998	0.129530906677246	0.240496844053268	0.253025949001312	0.185746386647224	0.191268563270569	0.238487273454666	0.186799347400665	0.214495480060577	0.215031236410141	0.229117333889008	0.198358058929443	0.165667548775673	0.140409827232361
1588	0.00942038744688034	0.124223947525024	0.0181682799011469	0.0542194023728371	0.0816426500678062	0.0331086032092571	0.0535939782857895	0.108650095760822	0.207373589277267	0.0455520972609520	0.0609545223414898	0.0998593270778656	0.143106177449226	0.232642754912376	0.130368545651436	0.240717723965645	0.253213793039322	0.185807421803474	0.192020058631897	0.239443376660347	0.187512174248695	0.215499565005302	0.216324329376221	0.229630246758461	0.200033292174339	0.167026177048683	0.141718298196793
1590	0.00940995849668980	0.124212294816971	0.0181616209447384	0.0543775074183941	0.0815312415361404	0.0330790355801582	0.0536704808473587	0.108675561845303	0.207208573818207	0.0456539243459702	0.0609384216368198	0.100271925330162	0.143558248877525	0.233185455203056	0.131113708019257	0.241199210286140	0.253609865903854	0.185798078775406	0.193012520670891	0.240617424249649	0.188470825552940	0.217043191194534	0.217866763472557	0.230462595820427	0.201852545142174	0.168155372142792	0.142665177583694
1592	0.00927152764052153	0.123980604112148	0.0180611610412598	0.0544874109327793	0.0812353044748306	0.0329378508031368	0.0536490753293037	0.108594961464405	0.206783369183540	0.0456724874675274	0.0609014220535755	0.100917078554630	0.144120872020721	0.233861178159714	0.131922125816345	0.241596296429634	0.254173278808594	0.186065569519997	0.194263145327568	0.242045909166336	0.189528912305832	0.218719020485878	0.219536706805229	0.231275796890259	0.203971996903420	0.169642090797424	0.143778696656227
1594	0.00921841617673636	0.123775236308575	0.0180135201662779	0.0547680892050266	0.0811232328414917	0.0329024530947208	0.0537038818001747	0.108535714447498	0.206530660390854	0.0457718968391418	0.0610003024339676	0.101517766714096	0.144983738660812	0.234742358326912	0.132946401834488	0.242465242743492	0.255402922630310	0.186843961477280	0.196575000882149	0.244445770978928	0.191317930817604	0.221350058913231	0.222340241074562	0.232376649975777	0.206446364521980	0.171332016587257	0.145045042037964
1596	0.00921992491930723	0.123393654823303	0.0180306602269411	0.0552746504545212	0.0810981914401054	0.0329285897314549	0.0538368523120880	0.108536534011364	0.206291139125824	0.0460087284445763	0.0611768253147602	0.102452881634235	0.146393194794655	0.236037686467171	0.134428456425667	0.243209391832352	0.256331115961075	0.187393754720688	0.198555096983910	0.246934816241264	0.193096563220024	0.223780751228333	0.225108906626701	0.233558326959610	0.209046781063080	0.173507615923882	0.146816387772560
1598	0.00919533055275679	0.123114831745625	0.0179951339960098	0.0555616170167923	0.0810209959745407	0.0328614152967930	0.0538303107023239	0.108489394187927	0.206129178404808	0.0461178272962570	0.0612161345779896	0.103109374642372	0.147418752312660	0.237022817134857	0.135898306965828	0.244091004133225	0.257443726062775	0.188155397772789	0.200891360640526	0.250277847051621	0.195413261651993	0.226568266749382	0.228360220789909	0.234992757439613	0.211828216910362	0.175448819994926	0.148110866546631
1600	0.00912963598966599	0.122752487659454	0.0178491640836000	0.0558312945067883	0.0807951614260674	0.0327178016304970	0.0537166632711887	0.108283206820488	0.205932527780533	0.0462364330887795	0.0612735077738762	0.103839293122292	0.148421779274941	0.238077625632286	0.137467712163925	0.244731724262238	0.257944464683533	0.188752934336662	0.202623635530472	0.252617657184601	0.197378814220428	0.228466778993607	0.230706617236137	0.235839217901230	0.214171275496483	0.177390411496162	0.149324700236321
1602	0.00914212130010128	0.122635245323181	0.0178035292774439	0.0561018586158752	0.0808171480894089	0.0327178798615932	0.0536523461341858	0.108178019523621	0.205788806080818	0.0463921315968037	0.0613092817366123	0.104137614369392	0.149044007062912	0.238089725375175	0.138373658061028	0.245652526617050	0.258405923843384	0.189503312110901	0.204331248998642	0.254693806171417	0.199576854705811	0.230202898383141	0.232743471860886	0.236399590969086	0.215698391199112	0.178563416004181	0.149818733334541
1604	0.00921880919486284	0.122598685324192	0.0178100876510143	0.0564083531498909	0.0810132324695587	0.0327501930296421	0.0535648129880428	0.108149707317352	0.205533534288406	0.0465509295463562	0.0613292865455151	0.104216717183590	0.149539694190025	0.237614512443542	0.138946041464806	0.245560944080353	0.258128285408020	0.189558193087578	0.204463347792625	0.254655003547668	0.200000032782555	0.230108454823494	0.232655718922615	0.236175894737244	0.215998291969299	0.179341718554497	0.149982705712318
1606	0.00921746995300055	0.122372858226299	0.0177635494619608	0.0562401823699474	0.0809650719165802	0.0326423943042755	0.0533710420131683	0.107910446822643	0.205225631594658	0.0463139377534390	0.0610704161226749	0.103528760373592	0.148879557847977	0.236204832792282	0.138186126947403	0.244347497820854	0.256690323352814	0.189099788665771	0.203314483165741	0.253399908542633	0.199410289525986	0.228702560067177	0.230955109000206	0.235500067472458	0.214181065559387	0.177997857332230	0.148959994316101
1608	0.00914097484201193	0.121916800737381	0.0176620315760374	0.0556428916752338	0.0807317346334457	0.0324095301330090	0.0528958290815353	0.107248008251190	0.204665035009384	0.0458432696759701	0.0604873597621918	0.102012671530247	0.147513359785080	0.233632415533066	0.136540099978447	0.242885977029800	0.254676431417465	0.188240364193916	0.200897678732872	0.251023650169373	0.197758719325066	0.225997656583786	0.227830395102501	0.233793392777443	0.211034625768662	0.175253778696060	0.146891400218010
1610	0.00904026813805103	0.121589653193951	0.0175754781812429	0.0549651458859444	0.0805053412914276	0.0321557037532330	0.0523772165179253	0.106734879314899	0.204226136207581	0.0453437007963657	0.0597619675099850	0.100237540900707	0.145598471164703	0.230235099792480	0.133948981761932	0.240252166986465	0.251415103673935	0.186670079827309	0.196143299341202	0.246761083602905	0.194371581077576	0.221193253993988	0.222062304615974	0.230882868170738	0.206060603260994	0.171402588486671	0.143805801868439
1612	0.00889116432517767	0.121189825236797	0.0174363832920790	0.0540273748338223	0.0801909416913986	0.0318343713879585	0.0516455285251141	0.105953551828861	0.203579857945442	0.0446811169385910	0.0588908232748508	0.0979033485054970	0.143229484558105	0.226469352841377	0.130717918276787	0.237228035926819	0.248090296983719	0.184653848409653	0.191350772976875	0.241887167096138	0.190326750278473	0.215920850634575	0.215604245662689	0.227228879928589	0.200445502996445	0.166652843356133	0.139899596571922
1614	0.00887909252196550	0.120951443910599	0.0173961631953716	0.0533323995769024	0.0799696221947670	0.0317164063453674	0.0512846969068050	0.105354703962803	0.202946305274963	0.0442321933805943	0.0584585480391979	0.0960291177034378	0.141105860471725	0.223196998238564	0.127814650535584	0.233314231038094	0.244150042533875	0.181762635707855	0.186057731509209	0.236231043934822	0.185305818915367	0.209976464509964	0.208612129092217	0.223191305994988	0.194762989878654	0.162020683288574	0.136274158954620
1616	0.00892941001802683	0.120641440153122	0.0173967685550451	0.0526282452046871	0.0797026529908180	0.0316197387874126	0.0509439408779144	0.104664005339146	0.202129602432251	0.0438008382916451	0.0580484829843044	0.0942869856953621	0.139032185077667	0.220227137207985	0.125204220414162	0.230355486273766	0.240858882665634	0.179127693176270	0.181538403034210	0.231216222047806	0.180868804454803	0.204937845468521	0.202940687537193	0.219298973679543	0.189793929457665	0.157827511429787	0.132756695151329
1618	0.00894043222069740	0.120392017066479	0.0173822380602360	0.0519526116549969	0.0794256329536438	0.0315186716616154	0.0506206639111042	0.104189068078995	0.201492518186569	0.0433397553861141	0.0575341992080212	0.0929589271545410	0.137070819735527	0.217883065342903	0.122901901602745	0.227505937218666	0.237860247492790	0.176558777689934	0.177488848567009	0.226533770561218	0.176844879984856	0.200514093041420	0.198046445846558	0.215888127684593	0.185416579246521	0.154341876506805	0.129574179649353
1620	0.00893259700387716	0.120096862316132	0.0173535030335188	0.0512396171689034	0.0791013911366463	0.0313925668597221	0.0502077974379063	0.103583179414272	0.200642958283424	0.0428755506873131	0.0570294857025147	0.0917331501841545	0.135412544012070	0.215905308723450	0.120945736765862	0.225541576743126	0.235623985528946	0.174537196755409	0.174756556749344	0.222550436854363	0.173794522881508	0.197172671556473	0.194320216774941	0.213244125247002	0.181842401623726	0.151560366153717	0.126975134015083
1622	0.00892444234341383	0.119761936366558	0.0173587985336781	0.0507106333971024	0.0786647945642471	0.0312279071658850	0.0499390736222267	0.103143617510796	0.199711799621582	0.0425430275499821	0.0567743591964245	0.0907624885439873	0.134113162755966	0.213809281587601	0.119133077561855	0.223656028509140	0.233617931604385	0.172655940055847	0.172440648078918	0.219104960560799	0.171146363019943	0.194202095270157	0.191253423690796	0.211477130651474	0.178752750158310	0.149192243814468	0.125009745359421
1624	0.00891249906271696	0.119339518249035	0.0173591487109661	0.0502337403595448	0.0781214609742165	0.0310379974544048	0.0496164485812187	0.102589145302773	0.198549553751946	0.0422005578875542	0.0565263777971268	0.0898557603359222	0.132912606000900	0.211799025535584	0.117601387202740	0.222044900059700	0.231885403394699	0.171027511358261	0.170190140604973	0.216118782758713	0.168858051300049	0.191276207566261	0.188456803560257	0.210049167275429	0.176206380128860	0.147378638386726	0.123403526842594
1626	0.00885558314621449	0.118857361376286	0.0172521118074656	0.0497133843600750	0.0774488970637322	0.0308090616017580	0.0492137446999550	0.102018490433693	0.197480425238609	0.0418021604418755	0.0560318343341351	0.0889194235205650	0.131331086158752	0.209690406918526	0.115931868553162	0.220567718148232	0.230195969343185	0.169625326991081	0.168116733431816	0.213546037673950	0.167003050446510	0.188769131898880	0.186075404286385	0.208757996559143	0.173850640654564	0.145720615983009	0.121811799705029
1628	0.00879510212689638	0.118401415646076	0.0171158406883478	0.0492315292358398	0.0768402665853500	0.0306098368018866	0.0487756393849850	0.101223267614841	0.196448147296906	0.0414741002023220	0.0555927008390427	0.0880859345197678	0.130188345909119	0.208176091313362	0.114699423313141	0.219794139266014	0.228828221559525	0.168647080659866	0.166674718260765	0.211097359657288	0.165621653199196	0.187021255493164	0.184301525354385	0.207353875041008	0.172192677855492	0.144577324390411	0.120655134320259
1630	0.00879370607435703	0.118267588317394	0.0171238873153925	0.0488998629152775	0.0765792429447174	0.0305503960698843	0.0486203879117966	0.100975625216961	0.195996820926666	0.0413075238466263	0.0553804300725460	0.0875224098563194	0.129428356885910	0.207031786441803	0.113755948841572	0.219099938869476	0.227651447057724	0.167844146490097	0.165533512830734	0.209081932902336	0.164536505937576	0.185590729117394	0.182874828577042	0.206275328993797	0.170726180076599	0.143445357680321	0.119703963398933
1632	0.00877092964947224	0.118129171431065	0.0171313174068928	0.0485730990767479	0.0763714686036110	0.0304694864898920	0.0485007353127003	0.100797459483147	0.195593371987343	0.0411674939095974	0.0551903396844864	0.0870248973369598	0.128768429160118	0.205961227416992	0.112987861037254	0.218403100967407	0.226611837744713	0.167135596275330	0.164488375186920	0.207498118281364	0.163680985569954	0.184073001146317	0.181366503238678	0.205233916640282	0.169342279434204	0.142574921250343	0.118840128183365
1634	0.00861424580216408	0.117738783359528	0.0169612597674131	0.0481234155595303	0.0758799687027931	0.0301701352000237	0.0481709390878677	0.100402124226093	0.194857597351074	0.0408510975539684	0.0548001676797867	0.0862915813922882	0.127600550651550	0.204453885555267	0.111933149397373	0.217775925993919	0.225655898451805	0.166611641645432	0.163654997944832	0.206286877393723	0.162950888276100	0.182865872979164	0.180135935544968	0.204433500766754	0.167879894375801	0.141513571143150	0.117463819682598
1636	0.00851514097303152	0.117440246045589	0.0168057661503553	0.0478062927722931	0.0755645036697388	0.0299747958779335	0.0478512793779373	0.0999661237001419	0.194168478250504	0.0406580753624439	0.0545519664883614	0.0857463628053665	0.126877427101135	0.203442156314850	0.111219458281994	0.217394605278969	0.225035220384598	0.166137099266052	0.162688717246056	0.205103352665901	0.162185683846474	0.181736901402473	0.179108873009682	0.203626751899719	0.166953206062317	0.140798106789589	0.116570211946964
1638	0.00863555073738098	0.117362894117832	0.0168620441108942	0.0477632060647011	0.0756840333342552	0.0300451386719942	0.0478099733591080	0.0998947471380234	0.194002494215965	0.0407496206462383	0.0545105375349522	0.0855092853307724	0.126476556062698	0.202584311366081	0.110581099987030	0.217139050364494	0.224620431661606	0.165746733546257	0.161962702870369	0.204005360603333	0.161649003624916	0.180802106857300	0.178295075893402	0.203163728117943	0.166092723608017	0.140082344412804	0.115954168140888
1640	0.00872335024178028	0.117337793111801	0.0169241763651371	0.0476871952414513	0.0757304579019547	0.0301037300378084	0.0478203780949116	0.0998651161789894	0.193912029266357	0.0408220067620277	0.0544781200587750	0.0853567123413086	0.126250222325325	0.201985448598862	0.110177308320999	0.216711938381195	0.224152907729149	0.165267929434776	0.161264330148697	0.202766329050064	0.161113902926445	0.179747879505157	0.177292868494988	0.202680394053459	0.165292441844940	0.139600008726120	0.115614771842957
1642	0.00873842556029558	0.117333538830280	0.0169979762285948	0.0475217364728451	0.0756447464227676	0.0301195736974478	0.0478495359420776	0.0997457280755043	0.193606972694397	0.0408417060971260	0.0543575137853622	0.0851523205637932	0.125916257500649	0.201270356774330	0.109795331954956	0.216294944286346	0.223731115460396	0.164987727999687	0.160693079233170	0.201875761151314	0.160753086209297	0.179129943251610	0.176517441868782	0.202263668179512	0.164444074034691	0.138997688889503	0.115106724202633
1644	0.00874443538486958	0.117346525192261	0.0170569848269224	0.0474019981920719	0.0755972340703011	0.0301030017435551	0.0478282161056995	0.0996004119515419	0.193477272987366	0.0407825224101543	0.0542906261980534	0.0849623903632164	0.125614851713181	0.200834557414055	0.109380088746548	0.215901061892509	0.223215430974960	0.164758563041687	0.159907698631287	0.200896307826042	0.160329923033714	0.178460612893105	0.175634667277336	0.201665416359901	0.163648366928101	0.138545930385590	0.114620372653008
1646	0.00875967461615801	0.117426238954067	0.0170725602656603	0.0472357012331486	0.0755118951201439	0.0300359521061182	0.0476812347769737	0.0994889959692955	0.193635925650597	0.0406110100448132	0.0542170479893684	0.0845409631729126	0.125116944313049	0.200407698750496	0.108684211969376	0.215569555759430	0.222800567746162	0.164458081126213	0.159244254231453	0.199985295534134	0.159841522574425	0.177588224411011	0.174778968095779	0.201019749045372	0.162744089961052	0.137925028800964	0.113919757306576
1648	0.00874384213238955	0.117475338280201	0.0170552898198366	0.0471355356276035	0.0754407271742821	0.0299907363951206	0.0476382672786713	0.0994377732276917	0.193615257740021	0.0404987707734108	0.0541575551033020	0.0842425748705864	0.124792277812958	0.199915081262589	0.108185224235058	0.214923381805420	0.222227051854134	0.163845956325531	0.158196762204170	0.198495969176292	0.158988684415817	0.176119714975357	0.173433542251587	0.200230315327644	0.161861658096313	0.137451350688934	0.113365530967712
1650	0.00867389701306820	0.117409966886044	0.0169983506202698	0.0470079295337200	0.0753521844744682	0.0298891495913267	0.0476211756467819	0.0993779301643372	0.193468332290649	0.0403629653155804	0.0540508441627026	0.0839121788740158	0.124413914978504	0.199029877781868	0.107635341584682	0.214646413922310	0.221827894449234	0.163645058870316	0.157536074519157	0.197796255350113	0.158568605780602	0.175418153405190	0.172778010368347	0.199633553624153	0.161075711250305	0.136804923415184	0.112732201814651
1652	0.00867878925055265	0.117409028112888	0.0170221887528896	0.0469854362308979	0.0753955543041229	0.0298943147063255	0.0476193353533745	0.0992856845259666	0.193433180451393	0.0403379090130329	0.0540784932672977	0.0838033929467201	0.124292619526386	0.198727980256081	0.107281960546970	0.214632898569107	0.221554026007652	0.163670867681503	0.156955271959305	0.197302117943764	0.158284500241280	0.174840077757835	0.172234624624252	0.199150383472443	0.160436928272247	0.136333584785461	0.112430214881897
1654	0.00877861585468054	0.117573268711567	0.0172097589820623	0.0470154583454132	0.0755875334143639	0.0300606470555067	0.0477960295975208	0.0992323234677315	0.193399101495743	0.0403862521052361	0.0541847944259644	0.0837168470025063	0.124186225235462	0.198590025305748	0.106881074607372	0.214437633752823	0.221361249685287	0.163444146513939	0.156457260251045	0.196537494659424	0.157907530665398	0.174154892563820	0.171638667583466	0.198829561471939	0.159794270992279	0.135748788714409	0.112207733094692
1656	0.00878685619682074	0.117613740265369	0.0172598995268345	0.0469142608344555	0.0755584836006165	0.0300539955496788	0.0478266738355160	0.0992292463779450	0.193319350481033	0.0402730889618397	0.0540632456541061	0.0834485664963722	0.123820200562477	0.198013156652451	0.106530554592609	0.214002415537834	0.220806762576103	0.162882596254349	0.155681222677231	0.195201888680458	0.157268598675728	0.173163965344429	0.170672073960304	0.198113307356834	0.158973753452301	0.135220497846603	0.111818760633469
1658	0.00873245764523745	0.117560714483261	0.0171932820230722	0.0467032641172409	0.0753695145249367	0.0299037508666515	0.0476781763136387	0.0992084220051765	0.193103015422821	0.0400535687804222	0.0538043640553951	0.0829787924885750	0.123296007514000	0.197169452905655	0.106104426085949	0.213596716523170	0.220278203487396	0.162573039531708	0.154954195022583	0.194221109151840	0.156669914722443	0.172395035624504	0.169671878218651	0.197153314948082	0.158305197954178	0.134676352143288	0.111260369420052
1660	0.00876494776457548	0.117697566747665	0.0171806812286377	0.0466880276799202	0.0753425657749176	0.0299535356462002	0.0476409569382668	0.0992253646254540	0.193091437220573	0.0400921143591404	0.0538142547011375	0.0827007666230202	0.123023428022861	0.197108492255211	0.105773665010929	0.212979868054390	0.219814702868462	0.162288025021553	0.153954461216927	0.193493008613586	0.155908226966858	0.171569377183914	0.168594881892204	0.196324259042740	0.157843023538589	0.134437993168831	0.111128561198711
1662	0.00885436125099659	0.117989622056484	0.0171962622553110	0.0466939136385918	0.0754214450716972	0.0301283393055201	0.0476647652685642	0.0994110777974129	0.193291693925858	0.0401934981346130	0.0539045967161655	0.0823737159371376	0.122776158154011	0.197252169251442	0.105500705540180	0.212811052799225	0.219902738928795	0.162026599049568	0.153560325503349	0.192945092916489	0.155570268630981	0.171171039342880	0.168080314993858	0.195666119456291	0.157451540231705	0.134153485298157	0.110972769558430
1664	0.00882380641996861	0.118049718439579	0.0171590130776167	0.0466029644012451	0.0754757151007652	0.0301151070743799	0.0476678609848022	0.0994208678603172	0.193437233567238	0.0401266589760780	0.0538880079984665	0.0821020826697350	0.122626245021820	0.197089090943337	0.105153523385525	0.212748035788536	0.220092147588730	0.161771938204765	0.153251037001610	0.192474097013474	0.155208215117455	0.170654028654099	0.167503684759140	0.195330664515495	0.156923368573189	0.133645951747894	0.110512711107731
1666	0.00873751565814018	0.118044219911098	0.0170799084007740	0.0465147048234940	0.0754917785525322	0.0300348810851574	0.0476666837930679	0.0992301255464554	0.193497076630592	0.0400210097432137	0.0538165569305420	0.0818388313055039	0.122502259910107	0.196849927306175	0.104744374752045	0.212243169546127	0.219730600714684	0.161322683095932	0.152536511421204	0.191951841115952	0.154715284705162	0.169745236635208	0.166807934641838	0.195116758346558	0.156351774930954	0.133206978440285	0.110078856348991
1668	0.00867819320410490	0.117987982928753	0.0170198846608400	0.0463782660663128	0.0753540843725205	0.0299454070627689	0.0476092547178268	0.0991439819335938	0.193318411707878	0.0399569608271122	0.0537064559757710	0.0816015824675560	0.122094780206680	0.196630015969276	0.104133583605289	0.211648598313332	0.219275504350662	0.160915032029152	0.151825144886971	0.191311359405518	0.154278129339218	0.168963685631752	0.166121169924736	0.194533646106720	0.155694082379341	0.132765844464302	0.109661832451820
1670	0.00862683169543743	0.117944240570068	0.0169467534869909	0.0461710318922997	0.0752580165863037	0.0298607852309942	0.0475455410778523	0.0990985631942749	0.193132787942886	0.0399134233593941	0.0536390058696270	0.0813274234533310	0.121726267039776	0.196484073996544	0.103691570460796	0.211597815155983	0.219463288784027	0.161103740334511	0.151686966419220	0.190958216786385	0.154220640659332	0.168901756405830	0.165768176317215	0.193833678960800	0.155380651354790	0.132456809282303	0.109387688338757
1672	0.00857791304588318	0.118054188787937	0.0169161800295115	0.0460602305829525	0.0753560289740562	0.0298658683896065	0.0475208386778832	0.0991516634821892	0.193387478590012	0.0400044322013855	0.0536560080945492	0.0812980011105537	0.121681123971939	0.196659564971924	0.103765033185482	0.211619913578033	0.219706892967224	0.161278679966927	0.151639953255653	0.190660282969475	0.154210656881332	0.168867155909538	0.165544435381889	0.193766355514526	0.155109629034996	0.132418155670166	0.109534144401550
1674	0.00853561423718929	0.118125915527344	0.0169124118983746	0.0459800101816654	0.0753648877143860	0.0298715028911829	0.0475121624767780	0.0992311835289002	0.193628430366516	0.0400615707039833	0.0536469072103500	0.0812817588448525	0.121671363711357	0.196745380759239	0.103760801255703	0.211536526679993	0.219996005296707	0.161222815513611	0.151372447609901	0.190301045775414	0.153994008898735	0.168699190020561	0.165269583463669	0.194098010659218	0.154676795005798	0.132311254739761	0.109565950930119
1676	0.00863691139966250	0.117987863719463	0.0169956423342228	0.0458893850445747	0.0752128437161446	0.0298758503049612	0.0475946664810181	0.0990863665938377	0.193368881940842	0.0399210713803768	0.0535775758326054	0.0809641033411026	0.121278695762157	0.196547225117683	0.103263720870018	0.211355030536652	0.220120176672935	0.161086499691010	0.151061385869980	0.190065562725067	0.153725937008858	0.168513089418411	0.164944812655449	0.194191709160805	0.154199615120888	0.131886646151543	0.109204933047295
1678	0.00873188208788633	0.117950417101383	0.0170835107564926	0.0458536185324192	0.0751531645655632	0.0299130808562040	0.0476654395461082	0.0989244952797890	0.193171203136444	0.0398625321686268	0.0536020137369633	0.0808049961924553	0.121050499379635	0.196614012122154	0.103072591125965	0.211115434765816	0.220044672489166	0.160621166229248	0.150544151663780	0.189848363399506	0.153245404362679	0.168144032359123	0.164384424686432	0.193931311368942	0.154192656278610	0.131721958518028	0.109125681221485
1680	0.00874877721071243	0.118209756910801	0.0171125270426273	0.0460131205618382	0.0753633901476860	0.0300825443118811	0.0478529632091522	0.0991893783211708	0.193524733185768	0.0400350391864777	0.0538530834019184	0.0809580460190773	0.121276676654816	0.197031989693642	0.103213578462601	0.210991248488426	0.220171883702278	0.160363093018532	0.150247678160667	0.189527422189713	0.152973487973213	0.168011263012886	0.164095968008041	0.193544179201126	0.154367014765739	0.131878584623337	0.109541513025761
1682	0.00877930782735348	0.118395872414112	0.0171399265527725	0.0461164042353630	0.0755058228969574	0.0301990006119013	0.0480295941233635	0.0995339900255203	0.193805605173111	0.0401493087410927	0.0540026463568211	0.0809921100735664	0.121372394263744	0.197255223989487	0.103177838027477	0.210845410823822	0.220589041709900	0.160342767834663	0.150200709700584	0.189009934663773	0.152815416455269	0.167966067790985	0.164043381810188	0.193210184574127	0.154358983039856	0.131924957036972	0.109620995819569
1684	0.00888367276638746	0.118545591831207	0.0172112584114075	0.0461122207343578	0.0756273344159126	0.0302544627338648	0.0482400991022587	0.0995720997452736	0.193970829248428	0.0401804000139236	0.0541044175624847	0.0808965191245079	0.121316432952881	0.197701811790466	0.103011272847652	0.210730478167534	0.220762625336647	0.160290375351906	0.150126755237579	0.188815861940384	0.152685567736626	0.167928576469421	0.163975223898888	0.193147733807564	0.154268860816956	0.131811812520027	0.109416253864765
1686	0.00887776352465153	0.118565253913403	0.0172074437141418	0.0460403002798557	0.0756049528717995	0.0302374716848135	0.0483473874628544	0.0995476767420769	0.194008037447929	0.0401294454932213	0.0541034899652004	0.0807791426777840	0.121284022927284	0.198184698820114	0.102845691144466	0.210516378283501	0.221169233322144	0.160057768225670	0.149949952960014	0.188605219125748	0.152549043297768	0.167960673570633	0.163854569196701	0.192966535687447	0.154101654887199	0.131656274199486	0.109284088015556
1688	0.00869734957814217	0.118475072085857	0.0170670375227928	0.0458611696958542	0.0753371492028236	0.0301470346748829	0.0483095832169056	0.0994284078478813	0.193784847855568	0.0399819314479828	0.0540098138153553	0.0804734975099564	0.121157951653004	0.198807492852211	0.102535553276539	0.210509762167931	0.221655815839767	0.159956976771355	0.149850815534592	0.188464909791946	0.152516663074493	0.168180778622627	0.163951203227043	0.192752048373222	0.153863266110420	0.131464347243309	0.109174430370331
1690	0.00862685684114695	0.118428640067577	0.0169965624809265	0.0458088293671608	0.0752530023455620	0.0301438365131617	0.0483268350362778	0.0993762537837029	0.193727359175682	0.0400004722177982	0.0540862418711185	0.0803756266832352	0.121123917400837	0.199132561683655	0.102451615035534	0.210567176342011	0.222387641668320	0.159949302673340	0.149814993143082	0.188584089279175	0.152540624141693	0.168576329946518	0.164291888475418	0.192574962973595	0.153758332133293	0.131252884864807	0.109292767941952
1692	0.00861788727343082	0.118311159312725	0.0169778764247894	0.0458179377019405	0.0752897337079048	0.0302052479237318	0.0484380871057510	0.0995041206479073	0.193811982870102	0.0401519462466240	0.0542917400598526	0.0804142877459526	0.121174030005932	0.199605956673622	0.102498844265938	0.210626959800720	0.223009958863258	0.159917727112770	0.149740502238274	0.188707679510117	0.152423158288002	0.168990746140480	0.164453431963921	0.192428559064865	0.153736025094986	0.130985423922539	0.109434485435486
1694	0.00868043676018715	0.118252150714397	0.0169822741299868	0.0459049306809902	0.0752894058823586	0.0302724819630384	0.0485953837633133	0.0995840057730675	0.193733274936676	0.0403137654066086	0.0543716140091419	0.0805067494511604	0.121269933879375	0.200139507651329	0.102627724409103	0.210828021168709	0.223877251148224	0.159884124994278	0.149588927626610	0.188598364591599	0.152252763509750	0.169406443834305	0.164544001221657	0.192286610603333	0.153621822595596	0.130836233496666	0.109509244561195
1696	0.00879018474370241	0.118265189230442	0.0170218367129564	0.0460628531873226	0.0752623826265335	0.0303749628365040	0.0488508716225624	0.0996340736746788	0.193508058786392	0.0404872149229050	0.0544615127146244	0.0806702598929405	0.121368043124676	0.200773715972900	0.102833062410355	0.210615158081055	0.224544823169708	0.159544318914413	0.149335816502571	0.188424527645111	0.151964396238327	0.169656082987785	0.164535149931908	0.192041635513306	0.153552815318108	0.130687072873116	0.109654933214188
1698	0.00877944286912680	0.118315070867538	0.0170401576906443	0.0461120754480362	0.0752656012773514	0.0304766464978457	0.0489817447960377	0.0996742844581604	0.193505719304085	0.0405770391225815	0.0546357110142708	0.0806788951158524	0.121506869792938	0.201717123389244	0.102807678282261	0.210161030292511	0.225191831588745	0.159109205007553	0.148998871445656	0.188415139913559	0.151543900370598	0.169921353459358	0.164524778723717	0.191740810871124	0.153605684638023	0.130589976906776	0.109880737960339
1700	0.00874271988868713	0.118347622454166	0.0170337874442339	0.0461386293172836	0.0752880647778511	0.0305771101266146	0.0491750389337540	0.0997677594423294	0.193623930215836	0.0406880453228951	0.0548951551318169	0.0806268379092217	0.121682666242123	0.202692314982414	0.102695360779762	0.209922894835472	0.225852683186531	0.158710166811943	0.148611113429070	0.188220232725143	0.151073992252350	0.169919788837433	0.164564073085785	0.191273272037506	0.153655335307121	0.130511552095413	0.110003545880318
1702	0.00881099700927734	0.118363015353680	0.0170482899993658	0.0462151244282723	0.0753069594502449	0.0307485833764076	0.0495406985282898	0.0999262109398842	0.193649783730507	0.0409100241959095	0.0551154464483261	0.0808006003499031	0.121840633451939	0.203667104244232	0.102831333875656	0.209689348936081	0.226592600345612	0.158335983753204	0.148222580552101	0.187950626015663	0.150635808706284	0.169957965612412	0.164528116583824	0.190754473209381	0.153726264834404	0.130364805459976	0.110227763652802
1704	0.00887739192694426	0.118351362645626	0.0170684065669775	0.0462488047778606	0.0753050222992897	0.0309004187583923	0.0499317906796932	0.100172206759453	0.193628787994385	0.0410711057484150	0.0552531071007252	0.0809703990817070	0.121872507035732	0.204660519957542	0.102869875729084	0.209272056818008	0.227566882967949	0.157939180731773	0.148194551467896	0.187930941581726	0.150340184569359	0.170543268322945	0.164558097720146	0.190091148018837	0.153608217835426	0.130206167697907	0.110448949038982
1706	0.00872034020721912	0.118115782737732	0.0169138126075268	0.0459932126104832	0.0750419348478317	0.0308194961398840	0.0499401204288006	0.100051090121269	0.193282201886177	0.0410212092101574	0.0552952364087105	0.0808076187968254	0.121722862124443	0.205825388431549	0.102489776909351	0.208996310830116	0.228579625487328	0.157706990838051	0.148318886756897	0.188028365373611	0.150168731808662	0.171085298061371	0.164792165160179	0.189639449119568	0.153392463922501	0.129843220114708	0.110468231141567
1708	0.00859615672379732	0.117865853011608	0.0167408362030983	0.0458173714578152	0.0748154744505882	0.0307912919670343	0.0499754361808300	0.0998210236430168	0.192920416593552	0.0410592146217823	0.0554100386798382	0.0806753709912300	0.121765337884426	0.206711024045944	0.102403163909912	0.209182322025299	0.230269730091095	0.157607629895210	0.148639544844627	0.188326984643936	0.150068819522858	0.171921834349632	0.165381252765656	0.189322918653488	0.153289422392845	0.129590719938278	0.110595732927322
1710	0.00871216692030430	0.117619335651398	0.0167645253241062	0.0459602177143097	0.0746798738837242	0.0310181416571140	0.0504037514328957	0.0998658984899521	0.192579060792923	0.0413477495312691	0.0557977370917797	0.0808017179369927	0.121990069746971	0.207908526062965	0.102634608745575	0.209246933460236	0.231707349419594	0.157310754060745	0.148661747574806	0.188409104943275	0.149812668561935	0.172619909048080	0.165741905570030	0.189129143953323	0.153214603662491	0.129298180341721	0.111075922846794
1712	0.00882128439843655	0.117408752441406	0.0168072357773781	0.0460692457854748	0.0745944529771805	0.0312025174498558	0.0508640296757221	0.100010789930820	0.192213386297226	0.0415653735399246	0.0561033710837364	0.0808996930718422	0.122095234692097	0.209095433354378	0.102560028433800	0.208816140890121	0.233287140727043	0.156581118702889	0.148147135972977	0.188177555799484	0.149122878909111	0.173480570316315	0.166068032383919	0.188655585050583	0.153198182582855	0.129154995083809	0.111490644514561
1714	0.00891363341361284	0.117117077112198	0.0168544445186853	0.0460838451981545	0.0745525881648064	0.0314729548990727	0.0513512827455998	0.100161835551262	0.191571399569511	0.0418122783303261	0.0565083324909210	0.0810048282146454	0.122287325561047	0.210832953453064	0.102380082011223	0.208675220608711	0.235288724303246	0.156343892216682	0.148195400834084	0.188508629798889	0.148981243371964	0.174600481987000	0.166676327586174	0.188231676816940	0.153341621160507	0.128922492265701	0.112035058438778
1716	0.00893519539386034	0.116953313350677	0.0168467145413160	0.0460773929953575	0.0744697600603104	0.0316548161208630	0.0517488010227680	0.100310131907463	0.191355571150780	0.0420706495642662	0.0569348186254501	0.0811612010002136	0.122598335146904	0.212738782167435	0.102628447115421	0.209085047245026	0.238408803939819	0.156311407685280	0.148720994591713	0.189389333128929	0.149151965975761	0.176462218165398	0.167911410331726	0.188155412673950	0.153728112578392	0.128751397132874	0.112531118094921
1718	0.00889597367495298	0.116840183734894	0.0166746899485588	0.0460611209273338	0.0743092447519302	0.0318471491336823	0.0523478314280510	0.100503467023373	0.191463112831116	0.0424656569957733	0.0575345791876316	0.0813516601920128	0.123103179037571	0.215644881129265	0.102919422090054	0.209209427237511	0.240704625844955	0.155843228101730	0.148731693625450	0.189644962549210	0.148714125156403	0.177782103419304	0.168534561991692	0.188337400555611	0.153998002409935	0.128609284758568	0.113225288689137
1720	0.00889070611447096	0.116614557802677	0.0165783222764730	0.0460637472569943	0.0741619020700455	0.0320048816502094	0.0528153553605080	0.100594475865364	0.191244378685951	0.0426867716014385	0.0579345151782036	0.0814535915851593	0.123332738876343	0.218153953552246	0.102718450129032	0.208901867270470	0.243226364254951	0.155034199357033	0.148576378822327	0.189788565039635	0.148010104894638	0.179122507572174	0.169104397296906	0.188163965940475	0.154139727354050	0.128485918045044	0.113781996071339
1722	0.00891814101487398	0.116164021193981	0.0165364257991314	0.0461051464080811	0.0739301815629005	0.0322529561817646	0.0534153319895268	0.100728914141655	0.190629824995995	0.0429517403244972	0.0584798492491245	0.0816168710589409	0.123604729771614	0.221019461750984	0.102654069662094	0.209018051624298	0.246646851301193	0.154769748449326	0.148831292986870	0.190853804349899	0.147878661751747	0.180759310722351	0.170251950621605	0.187536060810089	0.154586955904961	0.128349006175995	0.114539586007595
1724	0.00908141024410725	0.116168200969696	0.0166183300316334	0.0464091561734676	0.0740477666258812	0.0327848643064499	0.0543230175971985	0.101122915744782	0.190583109855652	0.0436453111469746	0.0593546405434608	0.0821686163544655	0.124369926750660	0.224600911140442	0.103462994098663	0.209464520215988	0.251018375158310	0.154644712805748	0.149232834577560	0.192211523652077	0.147851765155792	0.182977154850960	0.171820655465126	0.187053173780441	0.155573099851608	0.128617167472839	0.115977838635445
1726	0.00934628862887621	0.116366587579250	0.0167862661182880	0.0469058118760586	0.0742713660001755	0.0335051752626896	0.0556817501783371	0.101946011185646	0.190765574574471	0.0446146838366985	0.0604690872132778	0.0830076038837433	0.125195369124413	0.228893324732780	0.104171663522720	0.210000187158585	0.255869895219803	0.154530480504036	0.149962201714516	0.193439900875092	0.147928074002266	0.186072364449501	0.173644110560417	0.186772465705872	0.156186237931252	0.128841504454613	0.117569074034691
1728	0.00943689607083798	0.116044066846371	0.0167289786040783	0.0470441281795502	0.0740379467606545	0.0339159630239010	0.0566533543169498	0.102333799004555	0.190173283219337	0.0451734364032745	0.0613612458109856	0.0833781436085701	0.125689685344696	0.233399957418442	0.104286186397076	0.210598737001419	0.261325538158417	0.154396966099739	0.150695204734802	0.194616630673409	0.147893115878105	0.189328670501709	0.175544589757919	0.186704024672508	0.156642213463783	0.128628283739090	0.118830285966396
1730	0.00950179435312748	0.115597456693649	0.0166047196835279	0.0471356995403767	0.0736945345997810	0.0343154594302177	0.0576829053461552	0.102627553045750	0.189332723617554	0.0457056760787964	0.0622276030480862	0.0836904793977737	0.126276373863220	0.238299086689949	0.104465529322624	0.211215257644653	0.267363846302032	0.154077544808388	0.151310279965401	0.196078836917877	0.147551164031029	0.192867472767830	0.177923753857613	0.186703637242317	0.157429635524750	0.128481075167656	0.120283953845501
1732	0.00953984260559082	0.115467756986618	0.0165415816009045	0.0473160035908222	0.0734808966517448	0.0348855517804623	0.0589976385235786	0.103220790624619	0.189305320382118	0.0464864782989025	0.0633893981575966	0.0843222439289093	0.127439722418785	0.243994802236557	0.104996360838413	0.211813092231751	0.273951202630997	0.153832852840424	0.151946961879730	0.197682529687881	0.147459536790848	0.196564525365829	0.180448964238167	0.186724424362183	0.158697545528412	0.128627166152000	0.122413530945778
1734	0.00962603650987148	0.115377008914948	0.0164940766990185	0.0475359559059143	0.0734228119254112	0.0355636551976204	0.0605651140213013	0.104117311537266	0.189328357577324	0.0473896116018295	0.0647529885172844	0.0851273760199547	0.128649756312370	0.250450164079666	0.105502195656300	0.212706446647644	0.281546533107758	0.153594762086868	0.153032347559929	0.200059652328491	0.147507369518280	0.201058164238930	0.183462277054787	0.186681255698204	0.160079732537270	0.128915786743164	0.124524287879467
1736	0.00992716290056706	0.115183472633362	0.0165559779852629	0.0480119735002518	0.0736486390233040	0.0365684702992439	0.0624867677688599	0.105100519955158	0.189152300357819	0.0486716218292713	0.0665540322661400	0.0863152518868446	0.130339190363884	0.258043557405472	0.106399476528168	0.213608101010323	0.289733648300171	0.153412267565727	0.154164493083954	0.202449753880501	0.147527143359184	0.205978319048882	0.186541780829430	0.186477228999138	0.161696523427963	0.129518374800682	0.127181157469749
1738	0.0101824915036559	0.114998765289783	0.0166257023811340	0.0484384745359421	0.0736861079931259	0.0375011190772057	0.0645575448870659	0.106125384569168	0.189048036932945	0.0499213300645351	0.0682996138930321	0.0873978510499001	0.131910189986229	0.266422480344772	0.107291661202908	0.215098366141319	0.299059808254242	0.153163433074951	0.155982226133347	0.205424949526787	0.147644847631454	0.211731553077698	0.190329387784004	0.186275824904442	0.163329377770424	0.129812836647034	0.129979476332665
1740	0.0103802727535367	0.114767290651798	0.0166496876627207	0.0489676520228386	0.0734971910715103	0.0385413356125355	0.0668354779481888	0.107266396284103	0.188928991556168	0.0512767322361469	0.0702996775507927	0.0886780098080635	0.133876457810402	0.276051163673401	0.108523488044739	0.216648802161217	0.309735447168350	0.153149113059044	0.157438769936562	0.208608359098434	0.147846445441246	0.218025669455528	0.194517061114311	0.186232775449753	0.165205270051956	0.130082026124001	0.133257672190666
1742	0.0105522451922297	0.114586062729359	0.0166306179016829	0.0493847355246544	0.0734510272741318	0.0395800322294235	0.0692496299743652	0.108490794897079	0.188778564333916	0.0527356266975403	0.0724566057324410	0.0899177715182304	0.135907515883446	0.286548018455505	0.109523616731167	0.218850672245026	0.322103232145309	0.153148740530014	0.159062504768372	0.212353378534317	0.148181453347206	0.225307017564774	0.199492171406746	0.186355680227280	0.167362838983536	0.130547299981117	0.136472076177597
1744	0.0107687683776021	0.114300377666950	0.0165685210376978	0.0499899461865425	0.0734608918428421	0.0408894419670105	0.0720526129007340	0.110076263546944	0.188597366213799	0.0544673949480057	0.0750641375780106	0.0915594622492790	0.138285771012306	0.298316329717636	0.110664941370487	0.220682978630066	0.335325419902802	0.152947455644608	0.160890445113182	0.216138869524002	0.148375928401947	0.233122751116753	0.204502955079079	0.186847344040871	0.169782876968384	0.131195500493050	0.140174016356468
1746	0.0110116126015782	0.114109106361866	0.0165472906082869	0.0506189651787281	0.0734619721770287	0.0422300957143307	0.0750296562910080	0.111670300364494	0.188541352748871	0.0562818385660648	0.0777842625975609	0.0932378992438316	0.140803545713425	0.311201870441437	0.112103909254074	0.222875535488129	0.350001692771912	0.152853593230248	0.163357019424438	0.220596671104431	0.148616328835487	0.241781517863274	0.210213631391525	0.187392503023148	0.172511607408524	0.131934151053429	0.144468694925308
1748	0.0113437585532665	0.113899894058704	0.0165215190500021	0.0514295212924480	0.0734629780054092	0.0437843129038811	0.0784327238798142	0.113585852086544	0.188475102186203	0.0583706535398960	0.0808367207646370	0.0952326878905296	0.143731594085693	0.325259804725647	0.113890163600445	0.225791469216347	0.366505563259125	0.153468027710915	0.166620880365372	0.226346373558044	0.149562597274780	0.252139151096344	0.217274382710457	0.188240334391594	0.175485700368881	0.132789060473442	0.149298921227455
1750	0.0116351107135415	0.113714851438999	0.0164943616837263	0.0521802902221680	0.0734453499317169	0.0454082451760769	0.0821233689785004	0.115436032414436	0.188638895750046	0.0605788119137287	0.0842302069067955	0.0974419265985489	0.147106155753136	0.340767294168472	0.115849643945694	0.229283794760704	0.384599775075913	0.154015913605690	0.170094504952431	0.232394725084305	0.150553688406944	0.263366401195526	0.224895626306534	0.189454928040504	0.178966477513313	0.133846268057823	0.154558807611465
1752	0.0119486404582858	0.113510012626648	0.0164595823734999	0.0529925525188446	0.0734553337097168	0.0471826232969761	0.0862354487180710	0.117656707763672	0.188922867178917	0.0629445090889931	0.0879519507288933	0.0998864844441414	0.150678560137749	0.357858747243881	0.117610149085522	0.232631817460060	0.404280900955200	0.154482007026672	0.173654660582542	0.238431245088577	0.151423290371895	0.275000333786011	0.232873827219009	0.191213443875313	0.182398572564125	0.134763509035110	0.160173103213310
1754	0.0122164934873581	0.113255470991135	0.0163299459964037	0.0538665093481541	0.0734770372509956	0.0490313768386841	0.0906343311071396	0.119817815721035	0.188929513096809	0.0655168816447258	0.0919184535741806	0.102373495697975	0.154228419065475	0.376533687114716	0.119590334594250	0.235995024442673	0.425463080406189	0.154783740639687	0.177163571119308	0.245012760162354	0.152130171656609	0.287570953369141	0.241410031914711	0.192452192306519	0.186175391077995	0.135749086737633	0.166166111826897
1756	0.0125804180279374	0.113090388476849	0.0162567924708128	0.0548826307058334	0.0735784620046616	0.0511356368660927	0.0954252406954765	0.122322708368301	0.189002946019173	0.0683771371841431	0.0963177606463432	0.105225160717964	0.158216565847397	0.396515071392059	0.121917314827442	0.239998191595078	0.448363244533539	0.155011251568794	0.180946990847588	0.252624839544296	0.152916342020035	0.301432102918625	0.250892817974091	0.193678900599480	0.190811023116112	0.136927098035812	0.172824695706368
1758	0.0132930083200336	0.113510817289352	0.0165757536888123	0.0563220195472240	0.0741640776395798	0.0538908727467060	0.100754730403423	0.125431492924690	0.189934268593788	0.0718033239245415	0.101477637887001	0.108937539160252	0.163258433341980	0.418441861867905	0.124950930476189	0.244035005569458	0.472469180822372	0.155426815152168	0.184791177511215	0.260598361492157	0.153645932674408	0.315687537193298	0.260685741901398	0.194767400622368	0.196035519242287	0.138981446623802	0.180380433797836
1760	0.0139156403020024	0.113773107528687	0.0168127901852131	0.0576386712491512	0.0745433866977692	0.0565050765872002	0.106328092515469	0.128706827759743	0.190773084759712	0.0752077251672745	0.106788858771324	0.112436547875404	0.168192878365517	0.441504597663879	0.127725824713707	0.248668327927589	0.498130857944489	0.156073659658432	0.189153343439102	0.268910735845566	0.154758080840111	0.330660372972488	0.271009564399719	0.196036070585251	0.200906753540039	0.140618205070496	0.187959447503090
1762	0.0144376726821065	0.113734088838100	0.0168431606143713	0.0589407421648502	0.0747317448258400	0.0589163340628147	0.112101808190346	0.131842479109764	0.191411107778549	0.0786909535527229	0.112352915108204	0.115760065615177	0.173310101032257	0.465718507766724	0.130581945180893	0.253184795379639	0.525026619434357	0.156486034393311	0.193360298871994	0.277139723300934	0.155673384666443	0.346340477466583	0.281745791435242	0.197347179055214	0.205862060189247	0.142283141613007	0.195897325873375
1764	0.0148470895364881	0.113712482154369	0.0168122202157974	0.0600650534033775	0.0748266875743866	0.0613619051873684	0.118003875017166	0.134869128465652	0.191842511296272	0.0822379961609840	0.117956265807152	0.119214259088039	0.178520560264587	0.490951418876648	0.133428826928139	0.258080363273621	0.553288400173187	0.156954243779182	0.197971612215042	0.285917580127716	0.156684011220932	0.362848430871964	0.293110340833664	0.198611587285995	0.211060717701912	0.143789902329445	0.204134985804558
1766	0.0152467023581266	0.113758623600006	0.0166640132665634	0.0613803826272488	0.0749400407075882	0.0640461966395378	0.124227181077003	0.138108089566231	0.192493379116058	0.0860149487853050	0.123828537762165	0.123053640127182	0.183930143713951	0.517117023468018	0.136334359645844	0.263139635324478	0.582538783550263	0.157413154840469	0.202638030052185	0.295362859964371	0.157770037651062	0.379693388938904	0.304772406816483	0.199832916259766	0.216409042477608	0.145495250821114	0.212771445512772
1768	0.0157400481402874	0.113802529871464	0.0166470184922218	0.0626270025968552	0.0751653611660004	0.0667528957128525	0.130516767501831	0.141265928745270	0.193023189902306	0.0897556394338608	0.129874348640442	0.126855701208115	0.189263269305229	0.542943358421326	0.139259368181229	0.268167346715927	0.611751675605774	0.157888174057007	0.207159459590912	0.304414808750153	0.158785730600357	0.396287202835083	0.316181421279907	0.201180145144463	0.221880316734314	0.147372245788574	0.221676394343376
1770	0.0163492355495691	0.113876827061176	0.0167218949645758	0.0639959946274757	0.0755335390567780	0.0695639625191689	0.137019813060761	0.144675701856613	0.193696886301041	0.0935205072164536	0.136091560125351	0.130822524428368	0.194611072540283	0.569223582744598	0.142143473029137	0.272651016712189	0.639844357967377	0.158343777060509	0.211805403232574	0.313164502382278	0.159693792462349	0.412598669528961	0.327170342206955	0.202976703643799	0.227322682738304	0.149344041943550	0.230675429105759
1772	0.0169539749622345	0.113998912274838	0.0167498439550400	0.0652260631322861	0.0758252516388893	0.0722782015800476	0.143404483795166	0.147816270589829	0.194356724619865	0.0973102226853371	0.142483606934547	0.134730637073517	0.199925601482391	0.596640646457672	0.145017400383949	0.277047604322433	0.668197870254517	0.158713847398758	0.216275185346603	0.321774452924728	0.160557061433792	0.428943365812302	0.338274985551834	0.204585403203964	0.232913479208946	0.151312753558159	0.239524126052856
1774	0.0175609234720469	0.114140510559082	0.0167553424835205	0.0664204359054565	0.0760892629623413	0.0749134719371796	0.149783700704575	0.151056945323944	0.195077821612358	0.101117894053459	0.148908421397209	0.138560533523560	0.205067306756973	0.623456478118897	0.147812128067017	0.281932592391968	0.697605311870575	0.159280136227608	0.220889896154404	0.330210387706757	0.161665305495262	0.445726037025452	0.349898666143417	0.206453189253807	0.238127171993256	0.152979120612144	0.247966855764389
1776	0.0180965419858694	0.114170551300049	0.0167307369410992	0.0676512718200684	0.0762954577803612	0.0776722356677055	0.156201571226120	0.154073745012283	0.195757865905762	0.104853533208370	0.155306428670883	0.142420426011086	0.210479706525803	0.649385094642639	0.150822982192040	0.286484777927399	0.726892113685608	0.159869819879532	0.225191906094551	0.338390618562698	0.162551745772362	0.462187647819519	0.361076414585114	0.208137169480324	0.242883816361427	0.154787674546242	0.256212949752808
1778	0.0185916610062122	0.114152848720551	0.0167206954210997	0.0687608569860458	0.0764596387743950	0.0802112221717835	0.162404492497444	0.156799435615540	0.196261912584305	0.108298018574715	0.161388054490089	0.145837247371674	0.215047463774681	0.672984898090363	0.152932986617088	0.291206717491150	0.756193637847900	0.160653516650200	0.229487285017967	0.346830189228058	0.163733467459679	0.478262752294540	0.372081398963928	0.209948211908340	0.247040241956711	0.156120508909225	0.264114230871201
1780	0.0190855599939823	0.114138156175613	0.0167791005223990	0.0699843615293503	0.0767619013786316	0.0826566442847252	0.168459326028824	0.159070566296577	0.196497619152069	0.111781924962997	0.167425468564034	0.149040937423706	0.219122663140297	0.694943487644196	0.154836699366570	0.295144021511078	0.782711982727051	0.160928755998611	0.233255505561829	0.354539096355438	0.164484232664108	0.492660015821457	0.381848394870758	0.211496457457542	0.250974386930466	0.157489761710167	0.271970689296722
1782	0.0195849519222975	0.114200055599213	0.0168424341827631	0.0708685740828514	0.0769484266638756	0.0847959667444229	0.174148276448250	0.160923093557358	0.196757107973099	0.114739641547203	0.172989398241043	0.152038663625717	0.222742453217506	0.716541349887848	0.156775817275047	0.298927664756775	0.807128489017487	0.161178335547447	0.237038418650627	0.361623257398605	0.165186941623688	0.505624294281006	0.390644580125809	0.212782204151154	0.254420965909958	0.158659324049950	0.278654694557190
1784	0.0202283505350351	0.114354558289051	0.0169427227228880	0.0717431530356407	0.0771657079458237	0.0869439542293549	0.179707571864128	0.162733986973763	0.197321832180023	0.117511935532093	0.178492173552513	0.155283436179161	0.226228281855583	0.737818360328674	0.158863723278046	0.301640987396240	0.829279720783234	0.161536172032356	0.239932581782341	0.367573618888855	0.165824264287949	0.516467809677124	0.398361206054688	0.213557019829750	0.257579654455185	0.160027131438255	0.284836977720261
1786	0.0205822885036469	0.114469297230244	0.0168840624392033	0.0723486468195915	0.0772732272744179	0.0887628197669983	0.184741601347923	0.164251625537872	0.197889819741249	0.120139218866825	0.183911263942719	0.157770588994026	0.229472175240517	0.758023798465729	0.160326465964317	0.303757041692734	0.848885178565979	0.161916881799698	0.242064848542213	0.371715158224106	0.166305989027023	0.525447845458984	0.404940068721771	0.214200362563133	0.260727196931839	0.161061763763428	0.291064113378525
1788	0.0208157449960709	0.114561468362808	0.0166837330907583	0.0729567185044289	0.0773498043417931	0.0905390530824661	0.189521446824074	0.166022792458534	0.198625624179840	0.122663222253323	0.189036086201668	0.159922793507576	0.232410967350006	0.775758802890778	0.161351054906845	0.305278807878494	0.866175830364227	0.161924257874489	0.243745177984238	0.374814420938492	0.166300803422928	0.533456146717072	0.410437852144241	0.214753568172455	0.262763947248459	0.161899581551552	0.296422660350800
1790	0.0212473887950182	0.114671744406223	0.0167171712964773	0.0733066052198410	0.0774988457560539	0.0920771211385727	0.193642988801003	0.166793465614319	0.198822841048241	0.124621056020260	0.193337783217430	0.161655530333519	0.234454691410065	0.790044784545898	0.161751314997673	0.306205421686173	0.879504263401032	0.161856189370155	0.244809895753860	0.376814842224121	0.166210398077965	0.538734257221222	0.413985013961792	0.214968889951706	0.264010041952133	0.162381634116173	0.300274729728699
1792	0.0217123460024595	0.114797197282314	0.0168256368488073	0.0735767185688019	0.0776447802782059	0.0933658406138420	0.197350755333900	0.167248904705048	0.198982551693916	0.126162096858025	0.197030603885651	0.163019880652428	0.235502079129219	0.800295233726502	0.161918133497238	0.306106120347977	0.889707326889038	0.161787763237953	0.244947820901871	0.378221571445465	0.165955275297165	0.542581856250763	0.416446059942246	0.215205535292625	0.264566391706467	0.162726208567619	0.303183406591415
1794	0.0220886673778296	0.114919751882553	0.0168886985629797	0.0737758725881577	0.0777676030993462	0.0943980738520622	0.200502663850784	0.167204633355141	0.199186831712723	0.127349480986595	0.200513839721680	0.163842856884003	0.235825955867767	0.807885289192200	0.161951228976250	0.305843561887741	0.896852135658264	0.161765962839127	0.244878634810448	0.378519088029861	0.165766358375549	0.544291555881500	0.417549639940262	0.215340316295624	0.264603048563004	0.162938296794891	0.305722951889038
1796	0.0223760176450014	0.115011423826218	0.0169260166585445	0.0738069489598274	0.0778762474656105	0.0950582399964333	0.202731370925903	0.166886374354363	0.199217483401299	0.127893894910812	0.202608302235603	0.164116844534874	0.235595002770424	0.810826241970062	0.161504626274109	0.305525481700897	0.902383446693420	0.161755800247192	0.244580268859863	0.378233611583710	0.165545687079430	0.545029461383820	0.417979836463928	0.215514272451401	0.263900697231293	0.162820026278496	0.306507885456085
1798	0.0225986856967211	0.114996016025543	0.0169231221079826	0.0734247192740440	0.0778659582138062	0.0953304022550583	0.204216331243515	0.166007354855537	0.199074879288673	0.127949967980385	0.204057246446610	0.163814589381218	0.234507918357849	0.811787962913513	0.160224035382271	0.304332286119461	0.902226984500885	0.161462455987930	0.243326857686043	0.375848442316055	0.164949774742126	0.542341411113739	0.416449397802353	0.215553373098373	0.262450695037842	0.162416473031044	0.306072026491165
1800	0.0227529164403677	0.115044124424458	0.0169427804648876	0.0731230974197388	0.0778158381581307	0.0952875912189484	0.204652756452560	0.164867669343948	0.198958680033684	0.127624705433846	0.204614698886871	0.163309901952744	0.232917934656143	0.809136688709259	0.159061729907990	0.302033424377441	0.898847758769989	0.160998895764351	0.241116628050804	0.371838152408600	0.164045140147209	0.536781907081604	0.413319408893585	0.215251997113228	0.260275125503540	0.161904841661453	0.304756730794907
1802	0.0229263864457607	0.115211896598339	0.0170448981225491	0.0727003663778305	0.0778054222464562	0.0949708819389343	0.204110503196716	0.163086861371994	0.198656812310219	0.126710489392281	0.204575940966606	0.162007108330727	0.230362713336945	0.801734983921051	0.157443806529045	0.299171417951584	0.891035616397858	0.160277858376503	0.238317728042603	0.367172598838806	0.163049474358559	0.529188632965088	0.408421635627747	0.214404985308647	0.257597893476486	0.161142855882645	0.302102982997894
1804	0.0228929929435253	0.115253023803234	0.0170246846973896	0.0721450597047806	0.0777739286422730	0.0943024009466171	0.203054130077362	0.161237061023712	0.198435753583908	0.125404715538025	0.203610256314278	0.160393074154854	0.227674156427383	0.792550146579742	0.155443459749222	0.295749872922897	0.878789424896240	0.159616723656654	0.234993055462837	0.361488968133926	0.162165448069572	0.519780874252319	0.402211397886276	0.213535919785500	0.254324674606323	0.160205706954002	0.298810660839081
1806	0.0227273087948561	0.115261323750019	0.0168880410492420	0.0712808445096016	0.0776099562644959	0.0930724963545799	0.200836598873138	0.158730000257492	0.198207318782806	0.123565189540386	0.201775461435318	0.158162891864777	0.224273860454559	0.779710829257965	0.153065487742424	0.292204022407532	0.863037705421448	0.159024134278297	0.231182783842087	0.354448705911636	0.161247834563255	0.509209215641022	0.395323365926743	0.212474107742310	0.250491768121719	0.159106805920601	0.294349521398544
1808	0.0224603321403265	0.115178376436234	0.0168234929442406	0.0703089982271195	0.0773724243044853	0.0913985371589661	0.197721540927887	0.156157955527306	0.197700425982475	0.121146187186241	0.198388710618019	0.155395969748497	0.219719991087914	0.760982692241669	0.150414720177650	0.288357257843018	0.843147456645966	0.158584475517273	0.227105647325516	0.346731722354889	0.160394802689552	0.496426939964294	0.387011379003525	0.211587131023407	0.245684817433357	0.157713726162910	0.288160204887390
1810	0.0221187192946672	0.115000806748867	0.0167692787945271	0.0692128837108612	0.0771756991744041	0.0893393605947495	0.193340376019478	0.153078138828278	0.196975320577621	0.118129521608353	0.193754792213440	0.152141377329826	0.214764460921288	0.738663554191589	0.147635579109192	0.283371627330780	0.817507743835449	0.157977193593979	0.221985548734665	0.337720572948456	0.159103453159332	0.480382055044174	0.376579314470291	0.210407137870789	0.240649640560150	0.156297877430916	0.281132519245148
1812	0.0217020623385906	0.114740103483200	0.0166602972894907	0.0679248347878456	0.0768428519368172	0.0869068875908852	0.187666460871696	0.149840325117111	0.196004524827003	0.114520236849785	0.188373699784279	0.148411944508553	0.209205880761147	0.713398218154907	0.144338369369507	0.278604477643967	0.789959192276001	0.157294645905495	0.217144921422005	0.328683912754059	0.157972902059555	0.463797509670258	0.365948647260666	0.209087625145912	0.235532253980637	0.154346659779549	0.272928774356842
1814	0.0212761536240578	0.114633619785309	0.0166014917194843	0.0667133107781410	0.0766035616397858	0.0844456627964973	0.181248575448990	0.146429777145386	0.195239454507828	0.110897153615952	0.182643979787827	0.144663050770760	0.203685298562050	0.687012076377869	0.141229107975960	0.273590564727783	0.760328471660614	0.156294018030167	0.212121084332466	0.319181710481644	0.156639382243156	0.446374386548996	0.354439169168472	0.207449302077293	0.230544552206993	0.152952745556831	0.264512330293655
1816	0.0207482296973467	0.114653103053570	0.0167011544108391	0.0653759166598320	0.0763588547706604	0.0817229002714157	0.174644932150841	0.143141910433769	0.194593116641045	0.107052408158779	0.176237419247627	0.140679761767387	0.197857484221458	0.658911764621735	0.138031840324402	0.268480956554413	0.728107750415802	0.155384868383408	0.206778675317764	0.308555960655212	0.155377596616745	0.428267747163773	0.342739433050156	0.205640360713005	0.225259676575661	0.151581779122353	0.255562961101532
1818	0.0201862454414368	0.114559918642044	0.0167650897055864	0.0641539618372917	0.0762159973382950	0.0788037553429604	0.167532488703728	0.139838010072708	0.194078549742699	0.102823242545128	0.169256150722504	0.136653229594231	0.191898524761200	0.627791523933411	0.134527847170830	0.263069093227387	0.693620979785919	0.154514029622078	0.201106891036034	0.297365427017212	0.154073387384415	0.409742653369904	0.330798864364624	0.204015493392944	0.219573855400085	0.150112241506577	0.245897412300110
1820	0.0195181518793106	0.114419698715210	0.0168011598289013	0.0628164783120155	0.0761509835720062	0.0755407810211182	0.159402668476105	0.136194482445717	0.193346083164215	0.0981503278017044	0.161586567759514	0.132262185215950	0.185693472623825	0.594627678394318	0.130936518311501	0.257630556821823	0.658124148845673	0.153674408793449	0.195434540510178	0.286068022251129	0.152705341577530	0.390802621841431	0.318463861942291	0.202417388558388	0.214106529951096	0.148482263088226	0.235746905207634
1822	0.0188856311142445	0.114196956157684	0.0167966373264790	0.0615007728338242	0.0759181678295136	0.0723838284611702	0.151275381445885	0.132907241582870	0.192488893866539	0.0935395061969757	0.153936922550201	0.127949461340904	0.179536014795303	0.562218070030212	0.127550005912781	0.252482920885086	0.622518658638001	0.152964442968369	0.190109953284264	0.275733649730682	0.151431068778038	0.372135013341904	0.306652307510376	0.200999826192856	0.208776757121086	0.146957099437714	0.225896015763283
1824	0.0182052142918110	0.113907180726528	0.0167816337198019	0.0601488240063190	0.0756057575345039	0.0692130923271179	0.143106758594513	0.129567787051201	0.191487267613411	0.0889632478356361	0.146180629730225	0.123710200190544	0.173526465892792	0.530536055564880	0.124339409172535	0.247602865099907	0.587226629257202	0.152087464928627	0.185069635510445	0.266291111707687	0.149905562400818	0.353710561990738	0.295290768146515	0.199333518743515	0.203581988811493	0.145518347620964	0.216270714998245
1826	0.0176269505172968	0.113710366189480	0.0167461633682251	0.0588863492012024	0.0754130408167839	0.0661092475056648	0.134946987032890	0.126359447836876	0.190724954009056	0.0845006853342056	0.138271942734718	0.119534090161324	0.167626097798347	0.499411016702652	0.121238850057125	0.243072748184204	0.552609920501709	0.151413664221764	0.180066943168640	0.256789028644562	0.148949787020683	0.335776746273041	0.284098625183105	0.197771236300468	0.198388680815697	0.143871143460274	0.206488847732544
1828	0.0170229356735945	0.113536082208157	0.0167045164853334	0.0576507896184921	0.0752098187804222	0.0630996525287628	0.126870021224022	0.123192384839058	0.189953744411469	0.0801506638526917	0.130778610706329	0.115592196583748	0.162087991833687	0.469047755002975	0.118413530290127	0.238265633583069	0.518532693386078	0.150548622012138	0.174889191985130	0.247271940112114	0.148037686944008	0.318260133266449	0.273110955953598	0.196008160710335	0.193642973899841	0.142485603690147	0.197295591235161
1830	0.0162508934736252	0.113168418407440	0.0166399311274290	0.0562257207930088	0.0747457519173622	0.0599566660821438	0.119016699492931	0.120203696191311	0.188967049121857	0.0757693201303482	0.123544789850712	0.111835516989231	0.156620323657990	0.439352869987488	0.115455001592636	0.233934059739113	0.486753761768341	0.149748802185059	0.170255526900291	0.238791316747665	0.146821528673172	0.301985144615173	0.263019621372223	0.194211825728416	0.189086616039276	0.140923723578453	0.188547313213348
1832	0.0155532527714968	0.112863220274448	0.0165788121521473	0.0551316514611244	0.0744191929697990	0.0570729933679104	0.111643880605698	0.117454610764980	0.188220039010048	0.0718053653836250	0.116638280451298	0.108344778418541	0.151661068201065	0.412057846784592	0.112829171121120	0.229655176401138	0.456993192434311	0.148927733302116	0.165818989276886	0.230850383639336	0.145401760935783	0.287023812532425	0.253528326749802	0.192552357912064	0.184729889035225	0.139645829796791	0.180326044559479
1834	0.0148588623851538	0.112499736249447	0.0165467448532581	0.0540850944817066	0.0741353109478951	0.0543173737823963	0.104673117399216	0.114745013415813	0.187349185347557	0.0681012347340584	0.110074818134308	0.104908235371113	0.147101417183876	0.386895567178726	0.110483199357986	0.225791424512863	0.428723603487015	0.148209288716316	0.161837160587311	0.223021790385246	0.144388094544411	0.273190498352051	0.244689345359802	0.190898939967155	0.180714920163155	0.138320282101631	0.172463312745094
1836	0.0143305100500584	0.112239889800549	0.0165272634476423	0.0531613305211067	0.0739683285355568	0.0519343540072441	0.0984829962253571	0.112452872097492	0.186547130346298	0.0648318231105804	0.104241080582142	0.102022595703602	0.142964676022530	0.363518804311752	0.108349584043026	0.222245335578918	0.402785152196884	0.147545218467712	0.158391833305359	0.216245263814926	0.143582433462143	0.260287791490555	0.236572593450546	0.189476087689400	0.176907032728195	0.137002438306808	0.165195703506470
1838	0.0138330059126019	0.111961923539639	0.0164910852909088	0.0522196404635906	0.0737229213118553	0.0496887005865574	0.0927675366401672	0.110200747847557	0.185469925403595	0.0617260001599789	0.0988654792308807	0.0993478968739510	0.139122366905212	0.342126607894897	0.106270007789135	0.218561187386513	0.379246562719345	0.146360307931900	0.154826745390892	0.210254997014999	0.142271757125855	0.248068645596504	0.228834852576256	0.187872588634491	0.173447519540787	0.135845080018044	0.158442601561546
1840	0.0131979556754231	0.111489169299603	0.0162945613265038	0.0511826761066914	0.0731869190931320	0.0473671518266201	0.0874953195452690	0.108097560703754	0.184515744447708	0.0585674680769444	0.0937341526150703	0.0966523438692093	0.135451719164848	0.323003709316254	0.104139029979706	0.215423002839088	0.357775539159775	0.145538419485092	0.151822313666344	0.204403132200241	0.141274675726891	0.237256735563278	0.221812307834625	0.186389863491058	0.170212805271149	0.134612783789635	0.152201816439629
1842	0.0126791149377823	0.111057557165623	0.0161099061369896	0.0503507144749165	0.0727961212396622	0.0454471521079540	0.0828524753451347	0.106026642024517	0.183680921792984	0.0559085384011269	0.0892564058303833	0.0943276658654213	0.132427662611008	0.306035041809082	0.102642260491848	0.212378561496735	0.338371455669403	0.144757568836212	0.149125620722771	0.198812440037727	0.140355914831162	0.227561905980110	0.215232238173485	0.184770405292511	0.167534708976746	0.133588448166847	0.146721333265305
1844	0.0124366870149970	0.110876418650150	0.0162667278200388	0.0498290918767452	0.0726216658949852	0.0439288094639778	0.0789040699601173	0.104431986808777	0.182832166552544	0.0536974184215069	0.0853907614946365	0.0922885537147522	0.129553779959679	0.290550619363785	0.101313374936581	0.209847047924995	0.321233689785004	0.144162878394127	0.146602228283882	0.194539010524750	0.139719858765602	0.218774884939194	0.209411680698395	0.183519244194031	0.164896190166473	0.132411971688271	0.141840055584908
1846	0.0121223563328385	0.110555551946163	0.0163278356194496	0.0492247492074966	0.0723289847373962	0.0424667373299599	0.0752407535910606	0.102955467998981	0.182000815868378	0.0516213700175285	0.0817812457680702	0.0903838649392128	0.126996278762817	0.276737153530121	0.0997601449489594	0.207353055477142	0.306021034717560	0.143561974167824	0.144182503223419	0.190817028284073	0.139098957180977	0.211126998066902	0.204240545630455	0.182412311434746	0.162083223462105	0.131041333079338	0.137282952666283
1848	0.0116332639008760	0.109811924397945	0.0162201952189207	0.0482772514224052	0.0717291980981827	0.0408432446420193	0.0715628415346146	0.101162485778332	0.180684953927994	0.0495340116322041	0.0782416760921478	0.0883375480771065	0.124497443437576	0.264460235834122	0.0980796217918396	0.205249235033989	0.293241381645203	0.142946809530258	0.142391234636307	0.187464490532875	0.138379245996475	0.204452335834503	0.199576288461685	0.181153118610382	0.159559354186058	0.129407152533531	0.132889866828918
1850	0.0113307684659958	0.109358601272106	0.0161293018609285	0.0476755723357201	0.0712866634130478	0.0396275334060192	0.0685418024659157	0.0997265353798866	0.179733604192734	0.0479045696556568	0.0753281563520432	0.0866947099566460	0.122473381459713	0.253826141357422	0.0970451086759567	0.203290387988091	0.281899064779282	0.142374947667122	0.141001924872398	0.184522628784180	0.137687712907791	0.198453694581985	0.195270195603371	0.180063486099243	0.157283648848534	0.128209859132767	0.129151716828346
1852	0.0110776768997312	0.108916372060776	0.0159999113529921	0.0471426360309124	0.0708659067749977	0.0385615378618240	0.0659460797905922	0.0983736142516136	0.178747728466988	0.0465160869061947	0.0728307366371155	0.0851570218801498	0.120791532099247	0.244522184133530	0.0961437821388245	0.200978159904480	0.271496653556824	0.141678616404533	0.139163881540298	0.181452602148056	0.136842221021652	0.192931920289993	0.190870821475983	0.178787156939507	0.155243068933487	0.127160206437111	0.125890702009201
1854	0.0109116425737739	0.108531892299652	0.0159934703260660	0.0466354712843895	0.0706314072012901	0.0375941321253777	0.0636698082089424	0.0972989499568939	0.178025752305985	0.0453459769487381	0.0705948993563652	0.0837950482964516	0.119114898145199	0.236041694879532	0.0950634181499481	0.199219316244125	0.262590438127518	0.141107901930809	0.137735873460770	0.178933367133141	0.136187270283699	0.188103571534157	0.186994940042496	0.177489906549454	0.153307527303696	0.125869587063789	0.122709415853024
1856	0.0107509605586529	0.108184538781643	0.0160088837146759	0.0461893454194069	0.0703642740845680	0.0367751345038414	0.0616659596562386	0.0962545499205589	0.177368894219399	0.0443855747580528	0.0686072334647179	0.0826562121510506	0.117806494235992	0.228980794548988	0.0942229405045509	0.197406381368637	0.254539310932159	0.140358462929726	0.136353954672813	0.176627084612846	0.135320186614990	0.183538883924484	0.183250069618225	0.175953418016434	0.151735022664070	0.124769777059555	0.120131939649582
1858	0.0105077903717756	0.107850044965744	0.0159200616180897	0.0456732101738453	0.0699693039059639	0.0359509997069836	0.0598119832575321	0.0953208208084106	0.176672339439392	0.0434302128851414	0.0666901394724846	0.0814631134271622	0.116495497524738	0.223004326224327	0.0934489071369171	0.195711180567741	0.247336581349373	0.139786541461945	0.135133221745491	0.174289405345917	0.134670153260231	0.179547384381294	0.179826438426971	0.174540102481842	0.150093138217926	0.123576685786247	0.117845408618450
1860	0.0102460235357285	0.107521571218967	0.0158338900655508	0.0452464856207371	0.0696381106972694	0.0351968705654144	0.0582208111882210	0.0945093929767609	0.176063507795334	0.0425435863435268	0.0650477707386017	0.0803231522440910	0.115307897329330	0.217864260077477	0.0928656458854675	0.193935811519623	0.240923836827278	0.139227464795113	0.133883804082870	0.172032326459885	0.134085193276405	0.176018103957176	0.176554724574089	0.173278316855431	0.148416042327881	0.122456692159176	0.115643694996834
1862	0.00985975004732609	0.107016585767269	0.0156858470290899	0.0447538755834103	0.0691598802804947	0.0343073979020119	0.0566036850214005	0.0936120003461838	0.175213575363159	0.0415551587939262	0.0634385794401169	0.0789177492260933	0.114072166383266	0.213050514459610	0.0921966060996056	0.192151740193367	0.235275775194168	0.138250604271889	0.132622718811035	0.169840976595879	0.133178263902664	0.172418251633644	0.173229515552521	0.171767905354500	0.146897703409195	0.121171243488789	0.113251440227032
1864	0.00971604511141777	0.106683857738972	0.0156106641516089	0.0443393848836422	0.0687642320990562	0.0335888452827930	0.0552588365972042	0.0928548276424408	0.174595639109612	0.0408078543841839	0.0619405582547188	0.0777832269668579	0.113056011497974	0.208639040589333	0.0914731621742249	0.190689206123352	0.230504646897316	0.137673765420914	0.131621807813644	0.168385341763496	0.132669851183891	0.169708728790283	0.170598134398460	0.170458078384399	0.145339518785477	0.120158068835735	0.111244976520538
1866	0.00964982714504004	0.106329441070557	0.0155691383406520	0.0439189933240414	0.0683634802699089	0.0329820066690445	0.0539815574884415	0.0919891670346260	0.173908382654190	0.0401496365666390	0.0606311038136482	0.0767727047204971	0.112150594592094	0.204874977469444	0.0909277871251106	0.189447775483131	0.226261377334595	0.137362822890282	0.130682721734047	0.167210891842842	0.132359489798546	0.167297691106796	0.168219566345215	0.169217795133591	0.143968015909195	0.119267143309116	0.109641417860985
1868	0.00958387646824122	0.106035299599171	0.0155396182090044	0.0435827076435089	0.0681128725409508	0.0325114652514458	0.0528794974088669	0.0914071872830391	0.173351228237152	0.0395826436579227	0.0595011077821255	0.0758868753910065	0.111131541430950	0.201427206397057	0.0905156657099724	0.188131302595139	0.222383350133896	0.136864304542542	0.129829809069633	0.165724366903305	0.131693780422211	0.164929956197739	0.165666282176971	0.168347299098969	0.142520293593407	0.118100836873055	0.108099542558193
1870	0.00946207996457815	0.105755746364594	0.0154902627691627	0.0432465411722660	0.0677785873413086	0.0320244915783405	0.0518986582756043	0.0907952412962914	0.172733888030052	0.0390571840107441	0.0584856495261192	0.0750474780797958	0.110286705195904	0.198253586888313	0.0899800881743431	0.186338528990746	0.218438819050789	0.136011987924576	0.128775179386139	0.163886815309525	0.130767747759819	0.162404820322990	0.162852302193642	0.167305201292038	0.141130104660988	0.117143109440804	0.106605738401413
1872	0.00916100759059191	0.105218917131424	0.0152833312749863	0.0426860749721527	0.0671794489026070	0.0312864519655705	0.0508614592254162	0.0899375006556511	0.171583503484726	0.0383538156747818	0.0572823882102966	0.0739641934633255	0.109303012490273	0.195051833987236	0.0891903936862946	0.184998050332069	0.215072095394135	0.135320812463760	0.127798393368721	0.162101000547409	0.130049720406532	0.160260662436485	0.160331040620804	0.166046157479286	0.139912858605385	0.116073809564114	0.104782417416573
1874	0.00899752601981163	0.104955025017262	0.0151891093701124	0.0423682630062103	0.0669524595141411	0.0308319870382547	0.0500634834170342	0.0893432125449181	0.171067684888840	0.0379538759589195	0.0563738830387592	0.0732869505882263	0.108714058995247	0.192756265401840	0.0888928622007370	0.183788299560547	0.212268054485321	0.134813249111176	0.126938834786415	0.160598069429398	0.129495203495026	0.158491149544716	0.158249422907829	0.165110886096954	0.138976171612740	0.115398101508617	0.103654101490974
1876	0.00887753814458847	0.104715742170811	0.0151879182085395	0.0420915037393570	0.0667794793844223	0.0304446965456009	0.0492782667279244	0.0890242233872414	0.170873522758484	0.0375892817974091	0.0554972998797894	0.0726665854454041	0.108098842203617	0.190580889582634	0.0886255353689194	0.182687163352966	0.209665209054947	0.134251609444618	0.126005306839943	0.159508228302002	0.128929391503334	0.156797498464584	0.156284630298615	0.164224207401276	0.137910440564156	0.114694826304913	0.102654173970222
1878	0.00882609095424414	0.104340732097626	0.0152174783870578	0.0418444350361824	0.0663970783352852	0.0301335025578737	0.0486334785819054	0.0886185988783836	0.170080944895744	0.0373368486762047	0.0546948425471783	0.0719319581985474	0.107266463339329	0.188174977898598	0.0880915448069572	0.181796148419380	0.207400843501091	0.133728936314583	0.125290662050247	0.158790811896324	0.128463760018349	0.155436068773270	0.154553264379501	0.163452073931694	0.136600479483604	0.113717019557953	0.101287417113781
1880	0.00879238452762365	0.103919573128223	0.0152542134746909	0.0416078865528107	0.0659866631031036	0.0297848340123892	0.0479795783758163	0.0878914892673492	0.169021725654602	0.0371020957827568	0.0538988523185253	0.0711929425597191	0.106527172029018	0.185920044779778	0.0876370295882225	0.180660992860794	0.205005124211311	0.133040651679039	0.124423228204250	0.157785654067993	0.127894341945648	0.153943702578545	0.152779206633568	0.162556335330009	0.135525196790695	0.112945064902306	0.100145608186722
1882	0.00871782097965479	0.103502668440342	0.0151029145345092	0.0411809943616390	0.0656133666634560	0.0293348133563995	0.0473015755414963	0.0873308181762695	0.168422862887383	0.0366046540439129	0.0529265999794006	0.0703243464231491	0.105736523866653	0.183676555752754	0.0870354473590851	0.179805189371109	0.203035637736321	0.132641077041626	0.123900495469570	0.157104849815369	0.127471983432770	0.152583211660385	0.151379942893982	0.161844179034233	0.134633719921112	0.111998289823532	0.0989758744835854
1884	0.00857735797762871	0.103148303925991	0.0149233303964138	0.0407623089849949	0.0653370395302773	0.0289474874734879	0.0466194637119770	0.0868332833051682	0.167902067303658	0.0361572541296482	0.0521147362887859	0.0696267485618591	0.105112180113792	0.182091340422630	0.0865566805005074	0.178900346159935	0.201201841235161	0.132364183664322	0.123437136411667	0.156453743577003	0.127134487032890	0.151399970054626	0.150125637650490	0.161249443888664	0.133918896317482	0.111381575465202	0.0980606898665428
1886	0.00826534070074558	0.102661490440369	0.0146420318633318	0.0403460934758186	0.0649418607354164	0.0284141991287470	0.0457327216863632	0.0862329974770546	0.167145833373070	0.0355935096740723	0.0512954443693161	0.0688776820898056	0.104375422000885	0.180553913116455	0.0860445424914360	0.178407520055771	0.199809283018112	0.132213607430458	0.122891716659069	0.155456140637398	0.127038076519966	0.150676414370537	0.149048179388046	0.160658240318298	0.133122518658638	0.110757738351822	0.0970257148146629
1888	0.00821211561560631	0.102376542985439	0.0146015463396907	0.0402166396379471	0.0647343173623085	0.0281861852854490	0.0452580600976944	0.0858083367347717	0.166760385036469	0.0353796407580376	0.0507425777614117	0.0683067888021469	0.103933751583099	0.179206937551498	0.0857445076107979	0.177883267402649	0.198671117424965	0.131979092955589	0.122434847056866	0.154822990298271	0.126871123909950	0.150084123015404	0.148094967007637	0.160240113735199	0.132388457655907	0.110250793397427	0.0962009951472282
1890	0.00825154688209295	0.102184541523457	0.0147064253687859	0.0401062779128552	0.0646101608872414	0.0280284341424704	0.0449253171682358	0.0853951051831245	0.166354790329933	0.0352418906986713	0.0502634868025780	0.0677715465426445	0.103568099439144	0.177917689085007	0.0854782313108444	0.177101552486420	0.197190612554550	0.131492927670479	0.121901355683804	0.153989583253860	0.126394808292389	0.149111837148666	0.146783679723740	0.159688711166382	0.131791770458221	0.109854660928249	0.0956012606620789
1892	0.00822161883115768	0.101944983005524	0.0147371012717485	0.0400392822921276	0.0644218921661377	0.0278652887791395	0.0446313805878162	0.0851657092571259	0.165758058428764	0.0350478589534760	0.0497562736272812	0.0673564001917839	0.103097580373287	0.176645025610924	0.0853593647480011	0.176360964775085	0.195812836289406	0.131063580513001	0.121482349932194	0.153272807598114	0.126005381345749	0.148219913244247	0.145762175321579	0.159118354320526	0.131175950169563	0.109395928680897	0.0949473604559898
1894	0.00816552620381117	0.101754248142242	0.0147289279848337	0.0399630330502987	0.0642781704664230	0.0277267973870039	0.0443020351231098	0.0849214866757393	0.165358722209930	0.0349193997681141	0.0493307039141655	0.0670900493860245	0.102842517197132	0.175761446356773	0.0851878747344017	0.175423651933670	0.194214135408402	0.130652353167534	0.121041543781757	0.152601644396782	0.125629171729088	0.147353753447533	0.144741579890251	0.158569991588593	0.130897134542465	0.109121643006802	0.0944128111004829
1896	0.00807607546448708	0.101674556732178	0.0146442893892527	0.0397830605506897	0.0641813129186630	0.0275752823799849	0.0439510680735111	0.0847299322485924	0.165375500917435	0.0348018966615200	0.0489080324769020	0.0668163150548935	0.102738939225674	0.174865826964378	0.0849413573741913	0.174993872642517	0.193020522594452	0.130347460508347	0.120574742555618	0.151919081807137	0.125325322151184	0.146627992391586	0.143824636936188	0.158131375908852	0.130652308464050	0.108876116573811	0.0938670113682747
1898	0.00796397216618061	0.101540572941303	0.0145575469359756	0.0396039932966232	0.0640726983547211	0.0273366104811430	0.0436243228614330	0.0845397263765335	0.165143340826035	0.0345873087644577	0.0484099164605141	0.0663807615637779	0.102376028895378	0.174011498689652	0.0846509635448456	0.174601167440414	0.191966757178307	0.130069240927696	0.120186045765877	0.151329308748245	0.125119909644127	0.146079406142235	0.143089413642883	0.157788529992104	0.130052924156189	0.108480438590050	0.0932373031973839
1900	0.00778279965743423	0.101290278136730	0.0144185759127140	0.0393450185656548	0.0638944581151009	0.0269784592092037	0.0431049987673759	0.0841441750526428	0.164539113640785	0.0342854708433151	0.0477690733969212	0.0657400190830231	0.101811304688454	0.173127025365829	0.0842996612191200	0.173927441239357	0.190808698534966	0.129666581749916	0.119629815220833	0.150853648781776	0.124809540808201	0.145719841122627	0.142359450459480	0.157333403825760	0.129514873027802	0.107992179691792	0.0925063341856003
1902	0.00767538230866194	0.101073324680328	0.0143323997035623	0.0391629338264465	0.0636624246835709	0.0267581082880497	0.0427528992295265	0.0839097127318382	0.164159312844276	0.0339965708553791	0.0472621619701386	0.0653446987271309	0.101277127861977	0.172147482633591	0.0840585678815842	0.173465326428413	0.190135672688484	0.129422813653946	0.119352161884308	0.150441065430641	0.124553367495537	0.145205050706863	0.141830876469612	0.156781122088432	0.129103496670723	0.107444077730179	0.0920183062553406
1904	0.00762112950906158	0.100867301225662	0.0142647568136454	0.0390363447368145	0.0634369924664497	0.0265944357961416	0.0424540229141712	0.0836704745888710	0.163778662681580	0.0338062532246113	0.0468207262456417	0.0650303214788437	0.100946865975857	0.171281084418297	0.0839399546384811	0.173031717538834	0.189342603087425	0.129137530922890	0.119103245437145	0.150106057524681	0.124345123767853	0.144639298319817	0.141262769699097	0.156146153807640	0.128728270530701	0.107079572975636	0.0916935577988625
1906	0.00769856199622154	0.100642353296280	0.0142833692952991	0.0390630997717381	0.0633461624383926	0.0265298094600439	0.0422310382127762	0.0833522677421570	0.163351923227310	0.0337240062654018	0.0464371889829636	0.0647333040833473	0.100735731422901	0.170368343591690	0.0838461443781853	0.172563686966896	0.188619211316109	0.128860488533974	0.118759848177433	0.149943351745605	0.124219268560410	0.144278764724731	0.140720099210739	0.155611589550972	0.128337621688843	0.106769934296608	0.0912624970078468
1908	0.00769795151427388	0.100451730191708	0.0142937488853931	0.0390340350568295	0.0632716566324234	0.0264304168522358	0.0420184470713139	0.0830786824226379	0.163015753030777	0.0336459800601006	0.0462254993617535	0.0645452290773392	0.100585177540779	0.169835925102234	0.0836156979203224	0.172139704227448	0.188000112771988	0.128694161772728	0.118504360318184	0.149724215269089	0.124081559479237	0.144052922725678	0.140305817127228	0.155147671699524	0.128104224801064	0.106554359197617	0.0909047946333885
1910	0.00757614895701408	0.100240476429462	0.0142686413601041	0.0389496982097626	0.0630733892321587	0.0262408982962370	0.0416656546294689	0.0828929394483566	0.162629231810570	0.0335720516741276	0.0460545830428600	0.0643486753106117	0.100349344313145	0.169298782944679	0.0834274664521217	0.171925455331802	0.187291860580444	0.128701880574226	0.118282958865166	0.149435400962830	0.123901724815369	0.143944203853607	0.139842256903648	0.154667690396309	0.127950727939606	0.106313623487949	0.0905105993151665
1912	0.00752542307600379	0.100105397403240	0.0142343649640679	0.0389525555074215	0.0629589557647705	0.0261391550302506	0.0414425581693649	0.0826783776283264	0.162390142679214	0.0334325470030308	0.0458407849073410	0.0640631467103958	0.100097805261612	0.168809905648232	0.0833301320672035	0.171744197607040	0.186824664473534	0.128569796681404	0.118047520518303	0.149224773049355	0.123664312064648	0.143665298819542	0.139389991760254	0.154261991381645	0.127724379301071	0.106087319552898	0.0901860743761063
1914	0.00751354731619358	0.0999754145741463	0.0141935236752033	0.0389020331203938	0.0629039630293846	0.0260187406092882	0.0412912890315056	0.0824285298585892	0.162141650915146	0.0332962833344936	0.0455839261412621	0.0637814030051231	0.0999312847852707	0.168316096067429	0.0831791087985039	0.171351522207260	0.186250716447830	0.128258913755417	0.117709666490555	0.148783072829247	0.123205155134201	0.143251404166222	0.138813465833664	0.153781339526176	0.127453655004501	0.105838283896446	0.0900081917643547
1916	0.00760708330199122	0.0998712480068207	0.0142806665971875	0.0387608073651791	0.0628354772925377	0.0259736906737089	0.0412383973598480	0.0823896527290344	0.161704808473587	0.0333382561802864	0.0453163795173168	0.0636405274271965	0.0997900217771530	0.167685002088547	0.0829900503158569	0.170947715640068	0.185573995113373	0.127825751900673	0.117427438497543	0.148366779088974	0.123001620173454	0.142779797315598	0.138269364833832	0.153299972414970	0.127165079116821	0.105435408651829	0.0897116586565971
1918	0.00763459922745824	0.0997318401932716	0.0143507821485400	0.0387281775474548	0.0627511516213417	0.0259563960134983	0.0411439426243305	0.0823096260428429	0.161394238471985	0.0332888476550579	0.0451506152749062	0.0634758323431015	0.0997145026922226	0.167322441935539	0.0830157399177551	0.170514300465584	0.184866845607758	0.127448439598084	0.117113552987576	0.148256450891495	0.122838035225868	0.142429634928703	0.137860402464867	0.152887582778931	0.127012044191360	0.105321496725082	0.0894363075494766
1920	0.00755307544022799	0.0995025560259819	0.0143212899565697	0.0387277230620384	0.0626002475619316	0.0258917938917875	0.0409259870648384	0.0821465775370598	0.161286205053329	0.0330907702445984	0.0449498817324638	0.0632380470633507	0.0995771661400795	0.167070746421814	0.0831545665860176	0.170176461338997	0.184555768966675	0.127286449074745	0.116856388747692	0.148100629448891	0.122702911496162	0.142566427588463	0.137783512473106	0.152511075139046	0.126919761300087	0.105288825929165	0.0891979634761810
1922	0.00746695278212428	0.0993308126926422	0.0142288384959102	0.0385761521756649	0.0624142363667488	0.0257288403809071	0.0407600477337837	0.0819889977574348	0.161084190011024	0.0328974276781082	0.0446380637586117	0.0629525333642960	0.0993182510137558	0.166929468512535	0.0829800590872765	0.169975429773331	0.184177666902542	0.127191498875618	0.116666480898857	0.147718384861946	0.122667551040649	0.142618745565414	0.137513250112534	0.152201741933823	0.126741498708725	0.104857109487057	0.0887595638632774
1924	0.00737416977062821	0.0991215631365776	0.0140906618908048	0.0383758656680584	0.0622127354145050	0.0255700200796127	0.0405340977013111	0.0816598832607269	0.160722002387047	0.0327630750834942	0.0443259701132774	0.0626378133893013	0.0990632250905037	0.166632041335106	0.0827368944883347	0.169662013649941	0.183530434966087	0.126944676041603	0.116426944732666	0.147441968321800	0.122660003602505	0.142572343349457	0.137110903859139	0.151845470070839	0.126513093709946	0.104466468095779	0.0884481593966484
1926	0.00736822374165058	0.0989289805293083	0.0140928504988551	0.0383528210222721	0.0621292442083359	0.0255526006221771	0.0404121205210686	0.0814194530248642	0.160328432917595	0.0327736027538776	0.0442431941628456	0.0625201240181923	0.0987264737486839	0.165862545371056	0.0825446769595146	0.169534757733345	0.183588549494743	0.126993924379349	0.116444073617458	0.147478744387627	0.122667990624905	0.142587199807167	0.137312725186348	0.151600137352943	0.126229181885719	0.104151949286461	0.0881914719939232
1928	0.00737464567646384	0.0987597629427910	0.0140997860580683	0.0383212156593800	0.0620730109512806	0.0255254544317722	0.0402650013566017	0.0812648832798004	0.159980237483978	0.0327722951769829	0.0441124103963375	0.0624317824840546	0.0984862148761749	0.165449365973473	0.0825549960136414	0.169426530599594	0.183585867285728	0.127094656229019	0.116453453898430	0.147420033812523	0.122589722275734	0.142551824450493	0.137462377548218	0.151398479938507	0.126045882701874	0.103934757411480	0.0880080461502075
1930	0.00738574890419841	0.0985845848917961	0.0140559077262878	0.0382307022809982	0.0619556158781052	0.0254594013094902	0.0399960950016975	0.0811207145452499	0.159561440348625	0.0326663367450237	0.0438831821084023	0.0622455030679703	0.0983108654618263	0.165389493107796	0.0824975296854973	0.168821603059769	0.182715550065041	0.126676470041275	0.116130873560905	0.146904066205025	0.122267894446850	0.142363980412483	0.137069314718246	0.151291206479073	0.125948980450630	0.103750459849834	0.0878749862313271
1932	0.00742820464074612	0.0984957143664360	0.0140948668122292	0.0382277816534042	0.0619339868426323	0.0254674293100834	0.0399517863988876	0.0809715017676354	0.159324198961258	0.0326558165252209	0.0438575930893421	0.0621131472289562	0.0981905385851860	0.165136456489563	0.0823618322610855	0.168455272912979	0.182268261909485	0.126372396945953	0.115978568792343	0.146727114915848	0.122155383229256	0.142254248261452	0.136801227927208	0.150921210646629	0.125765815377235	0.103587239980698	0.0876515358686447
1934	0.00749089149758220	0.0984416380524635	0.0142033621668816	0.0383094511926174	0.0619938224554062	0.0255269054323435	0.0399746187031269	0.0808254033327103	0.159161761403084	0.0327348075807095	0.0438359938561916	0.0620168857276440	0.0980495959520340	0.164815127849579	0.0823289677500725	0.168412283062935	0.182098060846329	0.126258015632629	0.115697450935841	0.146706193685532	0.122023791074753	0.142168074846268	0.136581078171730	0.150328561663628	0.125712677836418	0.103468164801598	0.0875388309359551
1936	0.00750416656956077	0.0984880402684212	0.0141952121630311	0.0383710153400898	0.0621279552578926	0.0256509687751532	0.0399572886526585	0.0808203294873238	0.159320607781410	0.0327704027295113	0.0437624938786030	0.0620493888854981	0.0980408936738968	0.165114477276802	0.0823089554905891	0.168370366096497	0.181965738534927	0.126219525933266	0.115597538650036	0.146657764911652	0.121992863714695	0.142124816775322	0.136639848351479	0.150101006031036	0.125752761960030	0.103541746735573	0.0876080766320229
1938	0.00748123833909631	0.0984220430254936	0.0141358599066734	0.0383360497653484	0.0620953366160393	0.0255891401320696	0.0399000421166420	0.0808014795184135	0.159297794103622	0.0326565615832806	0.0436044335365295	0.0618780218064785	0.0979562103748322	0.165000259876251	0.0822240635752678	0.168209612369537	0.181719914078712	0.126128628849983	0.115663401782513	0.146574094891548	0.121898405253887	0.142088070511818	0.136657789349556	0.149937584996223	0.125461444258690	0.103387899696827	0.0874383896589279
1940	0.00733178202062845	0.0980494543910027	0.0139457564800978	0.0380632430315018	0.0618172548711300	0.0252344068139792	0.0396352894604206	0.0805276557803154	0.158725053071976	0.0323974117636681	0.0432671271264553	0.0614177547395229	0.0976709872484207	0.164319455623627	0.0821599885821343	0.168073490262032	0.181734755635262	0.126015946269035	0.115696415305138	0.146479055285454	0.121615111827850	0.142207339406014	0.136364147067070	0.149728819727898	0.125182077288628	0.103057213127613	0.0870196148753166
1942	0.00730544188991189	0.0978818908333778	0.0139201125130057	0.0379622429609299	0.0616865605115891	0.0251391846686602	0.0394629687070847	0.0802906975150108	0.158442348241806	0.0323375090956688	0.0430604554712772	0.0612604804337025	0.0975725352764130	0.164055064320564	0.0819923952221870	0.168022185564041	0.181789293885231	0.126015782356262	0.115541517734528	0.146461933851242	0.121702641248703	0.142410784959793	0.136357501149178	0.149662524461746	0.125091403722763	0.102902032434940	0.0868204236030579
1944	0.00732089765369892	0.0978313609957695	0.0140147600322962	0.0379350408911705	0.0615492053329945	0.0251446906477213	0.0393802449107170	0.0800575241446495	0.158249840140343	0.0322906523942947	0.0429129488766193	0.0611707977950573	0.0974879786372185	0.163892909884453	0.0817743688821793	0.167854502797127	0.181653603911400	0.126093029975891	0.115297801792622	0.146413162350655	0.121981605887413	0.142731830477715	0.136478826403618	0.149560183286667	0.125018477439880	0.102746337652206	0.0867092460393906
1946	0.00722510181367397	0.0977691113948822	0.0139851700514555	0.0379511006176472	0.0614400245249271	0.0250776130706072	0.0392585657536984	0.0799603387713432	0.158087834715843	0.0321611873805523	0.0428725406527519	0.0611450672149658	0.0973786562681198	0.163790196180344	0.0817199572920799	0.167612224817276	0.181455165147781	0.126061171293259	0.115313962101936	0.146312534809113	0.121949017047882	0.142603605985641	0.136342570185661	0.149431735277176	0.124989129602909	0.102555833756924	0.0864912793040276
1948	0.00715268217027187	0.0976788923144341	0.0139255020767450	0.0379584282636642	0.0613965243101120	0.0249962564557791	0.0391579419374466	0.0798895210027695	0.157944902777672	0.0320957340300083	0.0427836216986179	0.0610861778259277	0.0972347110509872	0.163781791925430	0.0817133858799934	0.167361065745354	0.181315377354622	0.125981926918030	0.115290410816669	0.146234422922134	0.121883668005466	0.142414033412933	0.136259198188782	0.149255871772766	0.124947197735310	0.102452926337719	0.0863406658172607
1950	0.00711816735565662	0.0975545123219490	0.0138675952330232	0.0379344858229160	0.0613323561847210	0.0249016806483269	0.0390757024288178	0.0799408704042435	0.157770097255707	0.0320582315325737	0.0426462665200233	0.0608822926878929	0.0971105098724365	0.163820803165436	0.0816656425595284	0.167181745171547	0.181027323007584	0.125830188393593	0.115066654980183	0.145834028720856	0.121673084795475	0.142241433262825	0.136132031679153	0.149007335305214	0.124987781047821	0.102357894182205	0.0861593559384346
1952	0.00709492806345224	0.0974885821342468	0.0138307381421328	0.0379082895815373	0.0613665319979191	0.0248906183987856	0.0390569902956486	0.0799345672130585	0.157810211181641	0.0320901945233345	0.0426164455711842	0.0607756301760674	0.0971783548593521	0.163730278611183	0.0818291381001473	0.167099684476852	0.180627703666687	0.125574901700020	0.114839389920235	0.145452797412872	0.121376261115074	0.142030224204063	0.136005833745003	0.148736000061035	0.125036999583244	0.102366976439953	0.0861218720674515
1954	0.00707839243113995	0.0974262580275536	0.0137949055060744	0.0378868207335472	0.0614450536668301	0.0249307323247194	0.0390163734555244	0.0797535330057144	0.157870024442673	0.0321352072060108	0.0426123552024365	0.0608297474682331	0.0972336679697037	0.163685187697411	0.0818089768290520	0.166929587721825	0.180067509412766	0.125224232673645	0.114471808075905	0.145137295126915	0.121051594614983	0.141725212335587	0.135867655277252	0.148336693644524	0.124919243156910	0.102357611060143	0.0860783979296684
1956	0.00714436965063214	0.0972805023193359	0.0137997753918171	0.0379173718392849	0.0613718181848526	0.0249002259224653	0.0388839207589626	0.0795951634645462	0.157739818096161	0.0320471152663231	0.0425950698554516	0.0607649795711041	0.0970810875296593	0.163443669676781	0.0815735086798668	0.166959047317505	0.180193066596985	0.125271677970886	0.114730902016163	0.145306080579758	0.121236726641655	0.141819164156914	0.136127769947052	0.148057788610458	0.124792955815792	0.102310456335545	0.0858328044414520
1958	0.00719878589734435	0.0971807017922401	0.0138056119903922	0.0379491448402405	0.0613258555531502	0.0248875766992569	0.0388348661363125	0.0794756636023521	0.157639369368553	0.0319681279361248	0.0425308011472225	0.0606065653264523	0.0969891846179962	0.163147360086441	0.0815058350563049	0.167042404413223	0.180384412407875	0.125299260020256	0.114936023950577	0.145396351814270	0.121456936001778	0.141829013824463	0.136261940002441	0.147996038198471	0.124640420079231	0.102243855595589	0.0857773497700691
1960	0.00721614714711905	0.0970904752612114	0.0138069475069642	0.0379461720585823	0.0613384284079075	0.0249166823923588	0.0388536825776100	0.0794227197766304	0.157422825694084	0.0318502187728882	0.0424246676266193	0.0604231022298336	0.0969001278281212	0.162877202033997	0.0813851878046989	0.166972950100899	0.180075094103813	0.125221922993660	0.114832602441311	0.145365282893181	0.121480688452721	0.141570240259171	0.135914281010628	0.148175477981567	0.124432690441608	0.102114327251911	0.0857912078499794
1962	0.00709430454298854	0.0968095958232880	0.0137321408838034	0.0378294624388218	0.0610551163554192	0.0248237159103155	0.0386852324008942	0.0792423188686371	0.157035812735558	0.0316231921315193	0.0422210246324539	0.0602000281214714	0.0965807884931564	0.162496119737625	0.0810145065188408	0.166887596249580	0.179891660809517	0.125092998147011	0.114792674779892	0.145181491971016	0.121295295655727	0.141469344496727	0.135929629206657	0.148093298077583	0.124264061450958	0.101816378533840	0.0856296420097351
1964	0.00693050818517804	0.0964720249176025	0.0136067271232605	0.0376508273184300	0.0607612952589989	0.0247192941606045	0.0384553186595440	0.0788831561803818	0.156580328941345	0.0314172431826592	0.0420447625219822	0.0599882565438747	0.0963272973895073	0.162296339869499	0.0808964669704437	0.166743963956833	0.179748997092247	0.124958999454975	0.114663317799568	0.144818827509880	0.121010228991508	0.141320213675499	0.136075317859650	0.147892415523529	0.124327965080738	0.101675175130367	0.0855280011892319
1966	0.00691014155745506	0.0966136753559113	0.0135734016075730	0.0376922152936459	0.0608636774122715	0.0247329641133547	0.0385666303336620	0.0789814963936806	0.156769901514053	0.0314214862883091	0.0420841388404369	0.0600680820643902	0.0964450761675835	0.162448734045029	0.0810913518071175	0.166606217622757	0.179175674915314	0.124777443706989	0.114409819245338	0.144285544753075	0.120861575007439	0.141043752431870	0.135792613029480	0.147774979472160	0.124468371272087	0.101887956261635	0.0855158194899559
1968	0.00694110058248043	0.0967004895210266	0.0136067075654864	0.0377858243882656	0.0608895421028137	0.0247791856527329	0.0386630073189735	0.0790999159216881	0.156824067234993	0.0314712189137936	0.0421368107199669	0.0600869283080101	0.0964993461966515	0.162205487489700	0.0810844451189041	0.166477799415588	0.178691864013672	0.124556146562099	0.114243015646935	0.143979817628860	0.120668128132820	0.140857115387917	0.135534718632698	0.147593125700951	0.124419100582600	0.102000385522842	0.0855199471116066
1970	0.00707818102091551	0.0966361537575722	0.0137696769088507	0.0378088727593422	0.0608918853104115	0.0248976610600948	0.0386961139738560	0.0790323466062546	0.156555339694023	0.0315530896186829	0.0422180555760860	0.0600835159420967	0.0965071320533752	0.161657780408859	0.0809515118598938	0.166167557239532	0.178241655230522	0.124200768768787	0.114012472331524	0.143561422824860	0.120257578790188	0.140508040785790	0.135243058204651	0.147223293781281	0.124339409172535	0.102056317031384	0.0856166332960129
1972	0.00701110716909170	0.0964526534080505	0.0136979324743152	0.0377447344362736	0.0607762299478054	0.0248526223003864	0.0385544300079346	0.0789720565080643	0.156329229474068	0.0314621180295944	0.0421293862164021	0.0599513053894043	0.0962527245283127	0.161362826824188	0.0807499662041664	0.165836617350578	0.177836239337921	0.123808197677135	0.113716006278992	0.143276631832123	0.119914367794991	0.139801204204559	0.135009497404099	0.146986186504364	0.124321781098843	0.102049030363560	0.0854818522930145
1974	0.00693816179409623	0.0962944924831390	0.0135607123374939	0.0377622768282890	0.0606689862906933	0.0248291399329901	0.0384347364306450	0.0788677930831909	0.156148225069046	0.0314083062112331	0.0420756489038467	0.0598568692803383	0.0960684716701508	0.161150410771370	0.0806887373328209	0.165434554219246	0.177464336156845	0.123451307415962	0.113323763012886	0.142990753054619	0.119655340909958	0.139266267418861	0.134793624281883	0.146713078022003	0.124272920191288	0.102002955973148	0.0854134708642960
1976	0.00715845171362162	0.0962608531117439	0.0137535976245999	0.0379340201616287	0.0608345270156860	0.0251085180789232	0.0386565662920475	0.0788849368691444	0.155977591872215	0.0315571054816246	0.0422658100724220	0.0597991570830345	0.0960562005639076	0.160861328244209	0.0806664526462555	0.165252238512039	0.177107855677605	0.123215004801750	0.113247267901897	0.142759487032890	0.119471043348312	0.139084398746490	0.134644940495491	0.146354839205742	0.124183431267738	0.101986609399319	0.0854899808764458
1978	0.00721736671403050	0.0961627364158630	0.0137909585610032	0.0378966666758060	0.0607656165957451	0.0251233093440533	0.0387311093509197	0.0788322687149048	0.155794531106949	0.0314543694257736	0.0422261618077755	0.0596499331295490	0.0957916006445885	0.160485714673996	0.0804037451744080	0.165048941969872	0.176739200949669	0.122933574020863	0.113002315163612	0.142276436090469	0.119225047528744	0.138784199953079	0.134307131171227	0.146107375621796	0.123959474265575	0.101884953677654	0.0854738950729370
1980	0.00715509615838528	0.0959464386105537	0.0135997617617249	0.0377186946570873	0.0604799240827560	0.0249923933297396	0.0385798662900925	0.0785359665751457	0.155491039156914	0.0312535613775253	0.0420264415442944	0.0594077073037624	0.0954882055521011	0.160004436969757	0.0800407901406288	0.164482742547989	0.176146060228348	0.122556529939175	0.112448275089264	0.141661539673805	0.118761561810970	0.138288974761963	0.133848518133163	0.145791754126549	0.123744823038578	0.101723641157150	0.0853930935263634
1982	0.00714607490226626	0.0957958921790123	0.0136076463386416	0.0376894809305668	0.0604298636317253	0.0250142067670822	0.0385757833719254	0.0783424451947212	0.155173093080521	0.0311280693858862	0.0419123321771622	0.0593028962612152	0.0953803509473801	0.159520238637924	0.0797669440507889	0.164262473583221	0.175775155425072	0.122305862605572	0.112181693315506	0.141247704625130	0.118471026420593	0.137856751680374	0.133733808994293	0.145430743694305	0.123546712100506	0.101636141538620	0.0852965638041496
1984	0.00713298050686717	0.0956853926181793	0.0136413797736168	0.0376652441918850	0.0604098513722420	0.0250165481120348	0.0385822951793671	0.0781692788004875	0.154881820082665	0.0310389846563339	0.0418523140251637	0.0591897331178188	0.0952163264155388	0.159092381596565	0.0796189382672310	0.164013266563416	0.175318852066994	0.122073523700237	0.111896216869354	0.140941768884659	0.118166349828243	0.137495324015617	0.133497327566147	0.145212486386299	0.123378641903400	0.101545780897141	0.0852055177092552
1986	0.00704870326444507	0.0954438522458077	0.0135812256485224	0.0375850200653076	0.0602317377924919	0.0250039678066969	0.0385109037160873	0.0780889019370079	0.154618680477142	0.0309435892850161	0.0419093072414398	0.0589925646781921	0.0950399339199066	0.158592626452446	0.0794446542859078	0.163663506507874	0.174464523792267	0.121613681316376	0.111285760998726	0.140528008341789	0.117835067212582	0.136785253882408	0.133154258131981	0.145057737827301	0.123153403401375	0.101389497518539	0.0850233212113380
1988	0.00701553933322430	0.0952186807990074	0.0135501362383366	0.0374833196401596	0.0600269921123982	0.0249468609690666	0.0384704396128655	0.0779269039630890	0.154313236474991	0.0307988617569208	0.0418419763445854	0.0588399507105351	0.0947134494781494	0.158074095845222	0.0790687426924706	0.163642436265945	0.174218907952309	0.121450453996658	0.111149176955223	0.140218734741211	0.117868527770042	0.136567413806915	0.133100882172585	0.144899606704712	0.122850246727467	0.101058237254620	0.0849718749523163
1990	0.00701897451654077	0.0950078740715981	0.0135262180119753	0.0373808406293392	0.0598089657723904	0.0248986314982176	0.0384175367653370	0.0776339843869209	0.153980702161789	0.0306658409535885	0.0417259819805622	0.0586818493902683	0.0944403707981110	0.157533898949623	0.0787781029939652	0.163775250315666	0.174161240458488	0.121458932757378	0.111191429197788	0.139827758073807	0.117911219596863	0.136376187205315	0.133067652583122	0.144762203097343	0.122615590691566	0.100883014500141	0.0848364159464836
1992	0.00710372021421790	0.0948615744709969	0.0134915467351675	0.0373775660991669	0.0598204210400581	0.0249775853008032	0.0384344793856144	0.0776373296976090	0.153855502605438	0.0307532940059900	0.0417717508971691	0.0587033145129681	0.0941775441169739	0.157089397311211	0.0786264836788178	0.163192927837372	0.173506319522858	0.120952628552914	0.110637873411179	0.139008805155754	0.117289945483208	0.135523438453674	0.132522702217102	0.144528806209564	0.122451245784760	0.100930623710155	0.0847121551632881
1994	0.00714420806616545	0.0946580395102501	0.0134703684598207	0.0373392514884472	0.0597672276198864	0.0249818321317434	0.0384402312338352	0.0776208564639092	0.153658404946327	0.0307616591453552	0.0417877100408077	0.0586182326078415	0.0939334779977799	0.156733363866806	0.0784151405096054	0.162786766886711	0.172984272241592	0.120484255254269	0.110173188149929	0.138444945216179	0.116795010864735	0.134966209530830	0.132099360227585	0.144194751977921	0.122203141450882	0.100738093256950	0.0846893191337585
1996	0.00713604828342795	0.0943646207451820	0.0134444264695048	0.0372126437723637	0.0596201457083225	0.0249473564326763	0.0384152419865131	0.0773778036236763	0.153283596038818	0.0306662302464247	0.0416872128844261	0.0583836063742638	0.0936947464942932	0.156181111931801	0.0781959071755409	0.162451684474945	0.172492220997810	0.120112411677837	0.109954752027988	0.137905627489090	0.116345927119255	0.134567618370056	0.131725594401360	0.143802464008331	0.122057199478149	0.100567199289799	0.0845934450626373
1998	0.00717161595821381	0.0943504348397255	0.0134461522102356	0.0372891128063202	0.0595601312816143	0.0249817930161953	0.0385008640587330	0.0773290991783142	0.153248161077499	0.0306331235915422	0.0417411960661411	0.0583039224147797	0.0936711728572846	0.156009823083878	0.0781832933425903	0.162080749869347	0.172033756971359	0.119837626814842	0.109623230993748	0.137503176927567	0.116077393293381	0.133997708559036	0.131431087851524	0.143551453948021	0.121998548507690	0.100706294178963	0.0846538245677948
2000	0.00718671223148704	0.0943356752395630	0.0134666832163930	0.0373004600405693	0.0594430081546307	0.0249693635851145	0.0385627001523972	0.0774100348353386	0.153243198990822	0.0305517408996820	0.0417619086802006	0.0581654869019985	0.0934930071234703	0.155691280961037	0.0779552012681961	0.161739140748978	0.171645388007164	0.119647242128849	0.109295815229416	0.137148633599281	0.115945786237717	0.133633539080620	0.131359636783600	0.143353402614594	0.121633112430573	0.100619211792946	0.0846001356840134
2002	0.00714903930202127	0.0940327867865562	0.0133866742253304	0.0369433239102364	0.0591710470616818	0.0247480235993862	0.0383795574307442	0.0770858377218247	0.152804493904114	0.0303373951464891	0.0415528416633606	0.0577624067664146	0.0930443406105042	0.154983848333359	0.0773249790072441	0.161760017275810	0.171595320105553	0.119592078030109	0.109047897160053	0.136578753590584	0.115960776805878	0.133415907621384	0.131325557827950	0.143270716071129	0.121209427714348	0.100295685231686	0.0841835364699364
2004	0.00711548887193203	0.0938425362110138	0.0133698582649231	0.0368172638118267	0.0590169467031956	0.0246643275022507	0.0383126065135002	0.0768121406435967	0.152484387159348	0.0302218403667212	0.0414495877921581	0.0575889125466347	0.0927462950348854	0.154564678668976	0.0770874768495560	0.161370396614075	0.171063870191574	0.119223535060883	0.108732946217060	0.135877877473831	0.115465708076954	0.132818639278412	0.130980700254440	0.143053099513054	0.120933085680008	0.100133270025253	0.0839469209313393
2006	0.00708095636218786	0.0937076881527901	0.0134140271693468	0.0368194654583931	0.0589265786111355	0.0246350448578596	0.0383717902004719	0.0766374617815018	0.152189850807190	0.0301347021013498	0.0413991436362267	0.0574854426085949	0.0924584418535233	0.154060557484627	0.0769060179591179	0.160496264696121	0.169979602098465	0.118711754679680	0.108355149626732	0.135119080543518	0.114874668419361	0.132070794701576	0.130452066659927	0.142638623714447	0.120764791965485	0.100050002336502	0.0837758332490921
2008	0.00712023256346583	0.0935874059796333	0.0133954072371125	0.0367629341781139	0.0587809756398201	0.0245853476226330	0.0384628847241402	0.0765463337302208	0.152075022459030	0.0301754232496023	0.0415024757385254	0.0574399791657925	0.0923248976469040	0.153355613350868	0.0766538456082344	0.160477086901665	0.169980749487877	0.118909090757370	0.108221672475338	0.134928464889526	0.114917181432247	0.131848454475403	0.130354017019272	0.142235115170479	0.120545975863934	0.100030049681664	0.0836862325668335
2010	0.00716593908146024	0.0935558304190636	0.0133691756054759	0.0367218181490898	0.0587597414851189	0.0246366281062365	0.0384934507310391	0.0765030458569527	0.152032271027565	0.0301967039704323	0.0415862277150154	0.0574061535298824	0.0923089534044266	0.153147771954536	0.0764645859599114	0.160519003868103	0.169975712895393	0.118832170963287	0.108147114515305	0.134661048650742	0.114881590008736	0.131580471992493	0.130116134881973	0.142079800367355	0.120338596403599	0.0999960079789162	0.0837665945291519
2012	0.00719189224764705	0.0935289487242699	0.0133074065670371	0.0367689952254295	0.0589835159480572	0.0247869286686182	0.0384200066328049	0.0765058472752571	0.152032285928726	0.0301448497921228	0.0416724830865860	0.0574219040572643	0.0922430977225304	0.153120830655098	0.0764517486095429	0.160265088081360	0.169493213295937	0.118477627635002	0.107855007052422	0.134322345256805	0.114855960011482	0.131258025765419	0.129597380757332	0.142006725072861	0.119878590106964	0.0999038740992546	0.0837749168276787
2014	0.00715223187580705	0.0931357368826866	0.0132333375513554	0.0365364961326122	0.0587011612951756	0.0245709270238876	0.0383375622332096	0.0762554556131363	0.151580825448036	0.0298766866326332	0.0414658524096012	0.0571233592927456	0.0915651991963387	0.152035251259804	0.0760370194911957	0.159938246011734	0.169080257415771	0.118433043360710	0.107642218470573	0.134167045354843	0.114723473787308	0.130810916423798	0.129346311092377	0.141885772347450	0.119218289852142	0.0993379205465317	0.0834193080663681
2016	0.00713760731741786	0.0927945971488953	0.0131696881726384	0.0363083593547344	0.0584422610700130	0.0244128536432982	0.0382694676518440	0.0758481994271278	0.151104822754860	0.0297565497457981	0.0413229465484619	0.0568396784365177	0.0912218838930130	0.151348605751991	0.0758036300539970	0.159652024507523	0.168652907013893	0.118258655071259	0.107447795569897	0.133939772844315	0.114544771611691	0.130310952663422	0.129057154059410	0.141695901751518	0.119055777788162	0.0991032123565674	0.0831951573491097
2018	0.00728125404566526	0.0930337309837341	0.0133284432813525	0.0363746546208859	0.0586236007511616	0.0245909560471773	0.0384180098772049	0.0760084986686707	0.151330247521400	0.0299205724149942	0.0414764396846294	0.0568838566541672	0.0913296192884445	0.151440814137459	0.0758140608668327	0.159129738807678	0.168091297149658	0.117943808436394	0.106981724500656	0.133389562368393	0.114310555160046	0.129626035690308	0.128519251942635	0.141302600502968	0.118960395455360	0.0992000773549080	0.0831341072916985
2020	0.00730588892474771	0.0930587351322174	0.0133777623996139	0.0362965725362301	0.0586015433073044	0.0245280638337135	0.0383885689079762	0.0760052502155304	0.151399433612824	0.0298174936324358	0.0413866415619850	0.0567493662238121	0.0910561531782150	0.150929883122444	0.0755588114261627	0.158649146556854	0.167606264352798	0.117761038243771	0.106615588068962	0.133100420236588	0.114113077521324	0.129143729805946	0.128092199563980	0.140993922948837	0.118631295859814	0.0990448445081711	0.0829595550894737
2022	0.00728709716349840	0.0929313525557518	0.0133233573287725	0.0361548773944378	0.0584440529346466	0.0243309512734413	0.0381973721086979	0.0756821408867836	0.151220142841339	0.0296438634395599	0.0411914177238941	0.0565494932234287	0.0907524451613426	0.150424048304558	0.0753151550889015	0.158207982778549	0.166958346962929	0.117489121854305	0.106261387467384	0.132685407996178	0.113832987844944	0.128673747181892	0.127538472414017	0.140589773654938	0.118252009153366	0.0988332554697990	0.0826553776860237
2024	0.00730813946574926	0.0929290130734444	0.0133265359327197	0.0361708328127861	0.0585078299045563	0.0243413001298904	0.0381053686141968	0.0756191313266754	0.151111394166946	0.0296272914856672	0.0411959812045097	0.0565659813582897	0.0908420979976654	0.149976700544357	0.0752849802374840	0.157503172755241	0.165918514132500	0.116954542696476	0.105877138674259	0.131933838129044	0.113258995115757	0.127731725573540	0.126873195171356	0.140134856104851	0.117847695946693	0.0985644012689591	0.0824002623558044
2026	0.00729996617883444	0.0928500220179558	0.0133099388331175	0.0361198671162128	0.0584899820387363	0.0242876429110765	0.0380463898181915	0.0755437687039375	0.150969281792641	0.0295594613999128	0.0411172769963741	0.0564583614468575	0.0906641632318497	0.149377688765526	0.0750127509236336	0.157089293003082	0.165418744087219	0.116837680339813	0.105623297393322	0.131784960627556	0.113041773438454	0.127211660146713	0.126505389809608	0.139814838767052	0.117351785302162	0.0982863530516625	0.0820815041661263
2028	0.00721126049757004	0.0926290452480316	0.0132806282490492	0.0359042100608349	0.0583163499832153	0.0241012144833803	0.0379481501877308	0.0753962770104408	0.150632470846176	0.0294159147888422	0.0409345738589764	0.0561633035540581	0.0902546793222427	0.148647576570511	0.0747061595320702	0.156962290406227	0.165092721581459	0.116872213780880	0.105401195585728	0.131847903132439	0.113105423748493	0.126788780093193	0.126198247075081	0.139543965458870	0.116906970739365	0.0979872867465019	0.0816138237714768
2030	0.00712912902235985	0.0924129560589790	0.0132646830752492	0.0357134230434895	0.0581287778913975	0.0239800736308098	0.0377918146550655	0.0752596259117127	0.150256633758545	0.0294072963297367	0.0408518314361572	0.0560256019234657	0.0898681357502937	0.147890150547028	0.0745045617222786	0.156172901391983	0.164065003395081	0.116282962262630	0.104974277317524	0.131023198366165	0.112590722739697	0.125921860337257	0.125335887074471	0.139284208416939	0.116452246904373	0.0977479964494705	0.0810934081673622
2032	0.00704607041552663	0.0921675786376000	0.0132540604099631	0.0355503484606743	0.0579659007489681	0.0238749589771032	0.0375472269952297	0.0750046223402023	0.149904489517212	0.0293014645576477	0.0406910516321659	0.0558494292199612	0.0895296633243561	0.147168710827827	0.0742333978414536	0.155375465750694	0.163038745522499	0.115827500820160	0.104450069367886	0.130303800106049	0.112120881676674	0.125039979815483	0.124495275318623	0.138929888606071	0.115911155939102	0.0974342375993729	0.0805767700076103
2034	0.00693315500393510	0.0918929278850555	0.0131643451750278	0.0352909229695797	0.0576964877545834	0.0236293785274029	0.0371564477682114	0.0745700150728226	0.149534121155739	0.0289676059037447	0.0403415225446224	0.0554877743124962	0.0890656337141991	0.146348983049393	0.0739992409944534	0.154712155461311	0.162026152014732	0.115565702319145	0.103924944996834	0.129363566637039	0.111758984625340	0.124096900224686	0.123686358332634	0.138288572430611	0.115512758493423	0.0969604626297951	0.0798653289675713
2036	0.00699206674471498	0.0918995365500450	0.0132003547623754	0.0353137403726578	0.0577461160719395	0.0235925093293190	0.0370601117610931	0.0743744000792503	0.149406552314758	0.0289799328893423	0.0402870662510395	0.0555093251168728	0.0890599712729454	0.146012187004089	0.0739698261022568	0.154167681932449	0.161199927330017	0.115220487117767	0.103566430509090	0.128817632794380	0.111555784940720	0.123609215021133	0.123049937188625	0.137914210557938	0.115261301398277	0.0968234390020371	0.0796602293848991
2038	0.00707652652636170	0.0919432342052460	0.0133066708222032	0.0354162976145744	0.0578542128205299	0.0235468912869692	0.0370275825262070	0.0743724405765533	0.149311169981956	0.0290215536952019	0.0401849113404751	0.0555006563663483	0.0889147147536278	0.145437300205231	0.0737381577491760	0.153763309121132	0.160416156053543	0.114920161664486	0.103135094046593	0.128458410501480	0.111243158578873	0.123113133013248	0.122331932187080	0.137602970004082	0.114605635404587	0.0965125709772110	0.0793680921196938
2040	0.00682420609518886	0.0914056375622749	0.0130991917103529	0.0350182205438614	0.0576120577752590	0.0231386218219996	0.0364159494638443	0.0738308131694794	0.148649066686630	0.0286156814545393	0.0395763292908669	0.0548347420990467	0.0883661881089211	0.144075587391853	0.0731936171650887	0.153145298361778	0.159205466508865	0.114472419023514	0.102619461715221	0.127806171774864	0.110835418105125	0.122110962867737	0.121450297534466	0.137185692787170	0.113827645778656	0.0956714227795601	0.0783290490508080
2042	0.00671536615118384	0.0910796299576759	0.0130104431882501	0.0347747765481472	0.0574362874031067	0.0229468569159508	0.0360253304243088	0.0733615905046463	0.148113980889320	0.0283456556499004	0.0392632335424423	0.0544573664665222	0.0881140381097794	0.143178641796112	0.0730633735656738	0.152454346418381	0.158220276236534	0.114008553326130	0.102293156087399	0.127319023013115	0.110544674098492	0.121358074247837	0.120791010558605	0.136716678738594	0.113319218158722	0.0953627899289131	0.0778294876217842
2044	0.00671055354177952	0.0908481776714325	0.0130619751289487	0.0347209498286247	0.0573089383542538	0.0228410270065069	0.0358322449028492	0.0730755701661110	0.147578567266464	0.0281754378229380	0.0390500240027905	0.0542462356388569	0.0878492519259453	0.142487138509750	0.0728445351123810	0.151832789182663	0.157314792275429	0.113530002534390	0.101931698620319	0.126881197094917	0.110121905803680	0.120551809668541	0.120021082460880	0.136112451553345	0.112919718027115	0.0951671525835991	0.0774659141898155
2046	0.00666546076536179	0.0907080769538879	0.0130747398361564	0.0346680134534836	0.0571504756808281	0.0227032862603664	0.0356437154114246	0.0729130506515503	0.147181451320648	0.0281285122036934	0.0388268232345581	0.0540844090282917	0.0875276625156403	0.141891047358513	0.0725757703185082	0.150995254516602	0.156025335192680	0.113018222153187	0.101469285786152	0.126068994402885	0.109426856040955	0.119689106941223	0.118968904018402	0.135452389717102	0.112493962049484	0.0949020534753799	0.0768772289156914
2048	0.00667433440685272	0.0905891358852387	0.0131232673302293	0.0346288308501244	0.0570238344371319	0.0226262472569942	0.0355065278708935	0.0727392137050629	0.146846905350685	0.0280872620642185	0.0386562608182430	0.0538846962153912	0.0872280672192574	0.141188874840736	0.0723551437258720	0.150238722562790	0.155141711235046	0.112607903778553	0.101066708564758	0.125396162271500	0.109021611511707	0.119119055569172	0.118213772773743	0.134826794266701	0.111896865069866	0.0945287272334099	0.0762540921568871
2050	0.00674874894320965	0.0904651954770088	0.0132110668346286	0.0345690213143826	0.0569652467966080	0.0226014666259289	0.0354070253670216	0.0724475756287575	0.146200776100159	0.0280212834477425	0.0384375415742397	0.0536887347698212	0.0868329629302025	0.140259832143784	0.0719775408506393	0.149665668606758	0.154379025101662	0.112182222306728	0.100607506930828	0.124801859259605	0.108630001544952	0.118460461497307	0.117473751306534	0.134081706404686	0.111427530646324	0.0940923988819122	0.0756353363394737
2052	0.00669706752523780	0.0902179703116417	0.0132187223061919	0.0344917215406895	0.0569866634905338	0.0225859303027391	0.0352320745587349	0.0721751525998116	0.145741775631905	0.0279371421784163	0.0383522287011147	0.0534362494945526	0.0866016671061516	0.139636814594269	0.0717793181538582	0.149160921573639	0.153393968939781	0.111800320446491	0.100243195891380	0.124183557927608	0.108338676393032	0.117633067071438	0.116772420704365	0.133518829941750	0.110949106514454	0.0937805101275444	0.0752864703536034
2054	0.00660519720986486	0.0899587795138359	0.0131839858368039	0.0344254411756992	0.0569164194166660	0.0224760677665472	0.0349455960094929	0.0718378797173500	0.145295456051826	0.0278139244765043	0.0381365828216076	0.0531231798231602	0.0862063243985176	0.138933882117271	0.0714785531163216	0.148672282695770	0.152591645717621	0.111486531794071	0.0998482182621956	0.123863674700260	0.108069770038128	0.117063149809837	0.116311915218830	0.132997170090675	0.110266961157322	0.0934330075979233	0.0748823508620262
2056	0.00648998608812690	0.0895911753177643	0.0130863487720490	0.0342203490436077	0.0566575452685356	0.0221793781965971	0.0344865433871746	0.0714186802506447	0.144507959485054	0.0275439228862524	0.0376558154821396	0.0526719018816948	0.0856360569596291	0.137780144810677	0.0710398107767105	0.148075327277184	0.151937201619148	0.111151911318302	0.0994189605116844	0.123693123459816	0.107720963656902	0.116484783589840	0.115903422236443	0.132451355457306	0.109658449888229	0.0928844138979912	0.0741868168115616
2058	0.00638215430080891	0.0892214477062225	0.0129848299548030	0.0340106859803200	0.0564405620098114	0.0219078622758389	0.0341002941131592	0.0711073726415634	0.143993437290192	0.0272955801337957	0.0373021923005581	0.0523728765547276	0.0853788107633591	0.137172669172287	0.0707459375262260	0.147587299346924	0.151329845190048	0.110956713557243	0.0993795171380043	0.123560741543770	0.107496991753578	0.116047650575638	0.115388058125973	0.132203117012978	0.109175853431225	0.0923997461795807	0.0735386759042740
2060	0.00627445150166750	0.0888971611857414	0.0128608988597989	0.0338132940232754	0.0562230087816715	0.0216782577335835	0.0336634069681168	0.0707320943474770	0.143560990691185	0.0270565524697304	0.0369760990142822	0.0521126501262188	0.0850650295615196	0.136662065982819	0.0705155059695244	0.147509440779686	0.150856629014015	0.110902845859528	0.0993564501404762	0.123506344854832	0.107438594102860	0.115885347127914	0.115080632269382	0.131993755698204	0.108716562390327	0.0920245274901390	0.0730299055576325
2062	0.00625221058726311	0.0887959674000740	0.0127407535910606	0.0336313098669052	0.0559994578361511	0.0215268321335316	0.0334145873785019	0.0703983828425407	0.143166974186897	0.0267954394221306	0.0367150157690048	0.0518124103546143	0.0846532508730888	0.135894596576691	0.0702983364462853	0.147779777646065	0.150793716311455	0.110889427363873	0.0993388742208481	0.123511329293251	0.107666246592999	0.115801356732845	0.115093663334847	0.131822422146797	0.108239598572254	0.0915595218539238	0.0725902915000916
2064	0.00629350868985057	0.0886861681938171	0.0127462521195412	0.0335565432906151	0.0559169501066208	0.0215110108256340	0.0332953669130802	0.0701717212796211	0.142842501401901	0.0268267616629601	0.0366546623408794	0.0516606979072094	0.0845828205347061	0.135366693139076	0.0700646266341209	0.147413030266762	0.150403186678886	0.110660903155804	0.0990473479032517	0.123013153672218	0.107499182224274	0.115364961326122	0.114766314625740	0.131876334547997	0.107715129852295	0.0912289097905159	0.0722887739539146
2066	0.00632698554545641	0.0885330662131310	0.0128350229933858	0.0335360541939735	0.0558918416500092	0.0215300824493170	0.0331740006804466	0.0700208693742752	0.142483919858933	0.0268817041069269	0.0365898497402668	0.0515485517680645	0.0844892859458923	0.134946078062058	0.0699824914336205	0.146823406219482	0.149797320365906	0.110460884869099	0.0987289696931839	0.122557476162910	0.107280574738979	0.114937029778957	0.114363409578800	0.131752088665962	0.107403367757797	0.0910243988037109	0.0720536708831787
2068	0.00631033536046743	0.0883696079254150	0.0128192855045199	0.0335371270775795	0.0556718073785305	0.0214521307498217	0.0330588854849339	0.0698722824454308	0.142235338687897	0.0268204584717751	0.0364710949361324	0.0513516329228878	0.0842529013752937	0.134566143155098	0.0700190514326096	0.146402224898338	0.149264931678772	0.110208936035633	0.0985619127750397	0.122271455824375	0.107068747282028	0.114570029079914	0.113776221871376	0.131200939416885	0.107297308743000	0.0908071175217629	0.0718880966305733
2070	0.00633233925327659	0.0884502530097961	0.0128464810550213	0.0335642620921135	0.0556496456265450	0.0214447397738695	0.0330370552837849	0.0698022469878197	0.142241135239601	0.0268464051187038	0.0365356765687466	0.0513632372021675	0.0844152271747589	0.134549945592880	0.0700282603502274	0.146007865667343	0.148646190762520	0.109868429601192	0.0982570052146912	0.121899768710136	0.106738455593586	0.114116370677948	0.113276712596416	0.130804330110550	0.107245974242687	0.0907920673489571	0.0717309415340424
2072	0.00638236803933978	0.0887026488780975	0.0129432259127498	0.0335651487112045	0.0557349324226379	0.0214705672115088	0.0331017114222050	0.0700072720646858	0.142479583621025	0.0268499013036490	0.0366297028958797	0.0514718182384968	0.0845517292618752	0.134476259350777	0.0699936747550964	0.145627081394196	0.148072272539139	0.109575062990189	0.0979197099804878	0.121815040707588	0.106483325362206	0.113641172647476	0.112845815718174	0.130389928817749	0.106909409165382	0.0906675383448601	0.0716862156987190
2074	0.00625052768737078	0.0884379968047142	0.0127757498994470	0.0334340408444405	0.0554949827492237	0.0212602242827415	0.0328460782766342	0.0697524249553680	0.142116695642471	0.0267050359398127	0.0364323742687702	0.0512447282671928	0.0841893181204796	0.133868917822838	0.0697391629219055	0.145338132977486	0.147730663418770	0.109262816607952	0.0978985577821732	0.121324203908443	0.106257252395153	0.113238938152790	0.112409770488739	0.129888311028481	0.106372579932213	0.0901824980974197	0.0711452960968018
2076	0.00614664331078529	0.0881999135017395	0.0126338200643659	0.0332947373390198	0.0552971176803112	0.0210802033543587	0.0325577929615974	0.0694187730550766	0.141750812530518	0.0265764351934195	0.0362420082092285	0.0511285550892353	0.0840322375297546	0.133668646216393	0.0696108415722847	0.144721418619156	0.147080138325691	0.108878977596760	0.0974904745817184	0.120753347873688	0.105871066451073	0.112752348184586	0.111772552132607	0.129508703947067	0.105838358402252	0.0899445116519928	0.0708332136273384
2078	0.00609521428123117	0.0880618914961815	0.0125685408711433	0.0331265702843666	0.0550809241831303	0.0209257546812296	0.0324293822050095	0.0692461207509041	0.141600370407105	0.0264365393668413	0.0359922721982002	0.0509144999086857	0.0838653445243835	0.133545726537704	0.0694770291447640	0.144050747156143	0.146357983350754	0.108562208712101	0.0969656184315682	0.120332732796669	0.105483666062355	0.112227641046047	0.111097991466522	0.129014045000076	0.105465948581696	0.0896751433610916	0.0705882981419563
2080	0.00609899172559381	0.0878914967179298	0.0125780748203397	0.0330158099532127	0.0548824071884155	0.0208274275064468	0.0323322005569935	0.0690580382943153	0.141237035393715	0.0264083277434111	0.0358225516974926	0.0506060570478439	0.0835220813751221	0.132864147424698	0.0692331269383431	0.143756151199341	0.146072387695313	0.108398042619228	0.0967287272214890	0.120224036276340	0.105239607393742	0.111947357654572	0.110720686614513	0.128415226936340	0.105096876621246	0.0891590714454651	0.0703584700822830
[truncated: 183 more rows]

## Sheet: Calibration data
	0	0	5	5	5	10	10	10	25	25	25	50	50	50	75	75	75
[truncated: 394 more rows]

## Sheet: Test data
	0	5	10	25	50	75
626	0.000220988008177214	-0.000322376481550001	-0.000229028986733049	0.000165734158635023	0.000377646771300588	-0.000192544884903917
628	0.000231629858232173	-0.000276318970709628	-0.000130479723520024	0.000544642627793440	0.000535300913496406	4.45314e+09
[truncated: 392 more rows]
