# Supplementary material for: Optics miniaturization strategy for demanding Raman spectroscopy applications
Source: Research Square preprint supplement (doi:10.21203/rs.3.rs-3186206/v1), 2023-08-16
Supplement: Supplementary file 13 [file Data S2 Quantification of methanol in water-ethanol solution.xlsx]

## Sheet: 660nm
	0	0	0	0	0.100000000000000	0.100000000000000	0.100000000000000	0.100000000000000	0.250000000000000	0.250000000000000	0.250000000000000	0.250000000000000	0.500000000000000	0.500000000000000	0.500000000000000	0.500000000000000	1	1	1	1	5	5	5	5	10	10	10	10	20	20	20	20	40	40	40	40
2628	0.0339454	0.0330827	0.0357457	0.032547	0.0344981	0.0410725	0.0357581	0.0355893	0.0366075	0.0346334	0.0390903	0.0331431	0.0361017	0.037091	0.0351442	0.0343618	0.0322122	0.0389647	0.0352362	0.0356027	0.0397064	0.0428353	0.0341	0.0404539	0.0426908	0.0410085	0.0402275	0.0403134	0.138808	0.113039	0.101603	0.100688	0.0537263	0.0555956	0.0541341	0.0541943
2630	0.0389063	0.0377892	0.0393302	0.0385582	0.038571	0.0441075	0.0392619	0.0398687	0.0408962	0.0384486	0.0425752	0.0379483	0.0418303	0.0411961	0.040648	0.0398845	0.0390409	0.04604	0.0401961	0.0417131	0.0476885	0.0491071	0.040047	0.0463341	0.049954	0.0486513	0.0472734	0.0467821	0.18567	0.150561	0.135306	0.128869	0.0678004	0.0666852	0.0652595	0.0649548
2632	0.0460892	0.045092	0.0450859	0.0479287	0.0449358	0.0481106	0.0444698	0.0458343	0.0471385	0.0441738	0.0476091	0.0448686	0.049602	0.0473265	0.0484635	0.0476744	0.0477995	0.0538867	0.0467346	0.0499079	0.056922	0.0565131	0.0474262	0.0537978	0.0613937	0.0595655	0.0570198	0.0555725	0.26197	0.210722	0.186806	0.172183	0.0914225	0.0872622	0.08453	0.0843383
2634	0.0549461	0.0540624	0.0522212	0.0576245	0.0533384	0.0549059	0.0519178	0.0536967	0.0558521	0.0526273	0.0552666	0.0540748	0.0595108	0.0562329	0.0573631	0.0569926	0.060371	0.065916	0.0592462	0.060183	0.0719263	0.0692742	0.062725	0.0677306	0.08068	0.0797974	0.0752421	0.0732159	0.358735	0.291504	0.264136	0.244267	0.118682	0.112991	0.108725	0.108404
2636	0.0704932	0.0705859	0.0664868	0.0722352	0.0699885	0.0706301	0.0681327	0.0696822	0.0720808	0.0709484	0.0708167	0.0717024	0.076264	0.0731854	0.0733807	0.0729111	0.0808617	0.0844677	0.0794213	0.0764397	0.0917419	0.0875096	0.0862916	0.0885225	0.10355	0.104193	0.0984859	0.096209	0.479034	0.387696	0.355555	0.333069	0.15201	0.144615	0.138632	0.13816
2638	0.090795	0.0923187	0.0868535	0.0913255	0.0918368	0.0915871	0.0894041	0.0905923	0.092869	0.0946275	0.0914115	0.0940074	0.0969268	0.0948087	0.0944776	0.0933194	0.104549	0.106035	0.102763	0.096371	0.114996	0.109789	0.11162	0.112852	0.132205	0.130819	0.125392	0.122287	0.634436	0.516609	0.475104	0.444729	0.192858	0.18618	0.178143	0.177908
2640	0.115135	0.116671	0.110051	0.113959	0.116008	0.115769	0.113535	0.114937	0.116408	0.119467	0.115504	0.118526	0.121833	0.119357	0.119192	0.118077	0.132558	0.135006	0.132294	0.120755	0.148021	0.14271	0.1425	0.146296	0.168533	0.163219	0.160277	0.156767	0.792646	0.659737	0.616472	0.583785	0.238774	0.231569	0.222858	0.222384
2642	0.149079	0.147898	0.142164	0.14526	0.146795	0.148865	0.146121	0.148578	0.14732	0.149902	0.147898	0.149605	0.155568	0.152065	0.152368	0.152754	0.166395	0.17168	0.168118	0.152904	0.187368	0.182158	0.179188	0.186522	0.209383	0.20045	0.200014	0.195466	0.94532	0.80194	0.755215	0.723348	0.296723	0.284276	0.278492	0.276727
2644	0.187978	0.18409	0.179973	0.182041	0.182516	0.187127	0.183896	0.187225	0.1836	0.185009	0.185238	0.185399	0.193777	0.18968	0.190052	0.192309	0.204139	0.213294	0.208503	0.189771	0.232673	0.224667	0.220519	0.230665	0.261119	0.248333	0.248341	0.23969	1.09783	0.952164	0.897948	0.86468	0.357728	0.341954	0.340927	0.337726
2646	0.232013	0.22699	0.220941	0.224611	0.225726	0.23278	0.229187	0.232197	0.229348	0.228138	0.228912	0.229478	0.239719	0.234463	0.232286	0.237805	0.250985	0.265466	0.259051	0.237665	0.287265	0.274477	0.271909	0.284334	0.316862	0.303572	0.303906	0.291085	1.23379	1.08979	1.03622	1.00549	0.409897	0.39343	0.395107	0.391049
2648	0.283238	0.278382	0.269017	0.276218	0.277751	0.286931	0.282819	0.284853	0.285042	0.279982	0.279748	0.28182	0.292253	0.286769	0.281136	0.290327	0.301854	0.318502	0.311815	0.293542	0.339584	0.324004	0.32347	0.338159	0.364979	0.354059	0.353485	0.339481	1.34976	1.20067	1.15455	1.1285	0.457638	0.438989	0.441823	0.436907
2650	0.332076	0.32833	0.317709	0.326686	0.327726	0.337105	0.332898	0.334692	0.335808	0.329209	0.32816	0.330326	0.340129	0.335187	0.328815	0.338986	0.348591	0.362395	0.35828	0.343648	0.385123	0.369158	0.366182	0.385024	0.408373	0.400258	0.396337	0.383286	1.45889	1.29947	1.25769	1.23352	0.503451	0.483078	0.486092	0.480984
2652	0.376483	0.374656	0.364371	0.372481	0.373566	0.38112	0.378044	0.379996	0.378681	0.373501	0.373001	0.373161	0.384139	0.377886	0.374874	0.382387	0.393724	0.402072	0.402138	0.388539	0.428366	0.413702	0.405298	0.429893	0.449826	0.444266	0.437286	0.426614	1.57454	1.40408	1.35999	1.33519	0.549038	0.528816	0.530266	0.526857
2654	0.419477	0.419635	0.411449	0.417113	0.418257	0.42324	0.421561	0.423714	0.419137	0.416397	0.416775	0.414278	0.426775	0.419267	0.420768	0.424101	0.437387	0.441371	0.444849	0.431354	0.469582	0.456401	0.444593	0.474053	0.490755	0.485828	0.477831	0.470504	1.70191	1.52832	1.47605	1.44836	0.594821	0.578101	0.575773	0.576586
2656	0.460756	0.460968	0.455085	0.459492	0.460604	0.464281	0.462673	0.465441	0.458691	0.457975	0.458507	0.454394	0.467548	0.460981	0.46298	0.464336	0.479154	0.48287	0.488007	0.472544	0.509924	0.497919	0.487605	0.519517	0.531928	0.526502	0.519451	0.517576	1.82499	1.65583	1.60182	1.57445	0.638733	0.626478	0.621219	0.624662
2658	0.502236	0.499924	0.494477	0.500594	0.501879	0.505845	0.50331	0.506621	0.498848	0.499361	0.499106	0.495918	0.508936	0.504497	0.502893	0.504575	0.520417	0.52623	0.531806	0.513683	0.550085	0.539243	0.53305	0.565865	0.572529	0.566508	0.561958	0.56432	1.93087	1.76289	1.71408	1.6922	0.681339	0.67027	0.666057	0.666544
2660	0.543267	0.538375	0.532464	0.541083	0.542695	0.547171	0.543844	0.547431	0.539317	0.540323	0.539533	0.537711	0.550028	0.547989	0.542165	0.544461	0.56099	0.568802	0.573559	0.554314	0.590121	0.579413	0.576304	0.610064	0.612745	0.606661	0.605605	0.606415	2.02873	1.8562	1.80572	1.78936	0.725263	0.712693	0.712154	0.706205
2662	0.582629	0.577607	0.571335	0.580933	0.583192	0.587062	0.584065	0.587659	0.579735	0.58042	0.580758	0.578096	0.589842	0.589369	0.581436	0.583702	0.60223	0.609918	0.613539	0.594252	0.631185	0.619671	0.617284	0.651975	0.65401	0.648771	0.652089	0.646224	2.11496	1.93926	1.88848	1.87753	0.770583	0.75662	0.75821	0.747144
2664	0.622582	0.619567	0.613218	0.621379	0.625107	0.626649	0.625329	0.628937	0.621391	0.620978	0.624332	0.618755	0.630464	0.630107	0.622622	0.624468	0.644949	0.651413	0.653643	0.635234	0.673199	0.661336	0.658767	0.693479	0.696892	0.691968	0.698064	0.686015	2.18725	2.00923	1.96463	1.95438	0.820074	0.805711	0.804457	0.793332
2666	0.663824	0.663483	0.657032	0.66304	0.668081	0.667804	0.66773	0.671879	0.664092	0.662487	0.668845	0.660737	0.672875	0.671879	0.66514	0.666671	0.687589	0.694993	0.694615	0.677383	0.716584	0.705314	0.70259	0.736352	0.7442	0.738633	0.742071	0.728149	2.25276	2.07071	2.03677	2.02039	0.872024	0.858768	0.852359	0.844656
2668	0.707841	0.709699	0.702012	0.706971	0.713143	0.713812	0.712371	0.717924	0.708551	0.706077	0.713862	0.706269	0.71903	0.717044	0.709846	0.711242	0.733633	0.744063	0.738855	0.723067	0.763139	0.752758	0.751639	0.782828	0.794693	0.789727	0.787198	0.774129	2.31843	2.13047	2.10568	2.08179	0.922833	0.911104	0.901278	0.896418
2670	0.756759	0.760426	0.751236	0.755234	0.76288	0.766093	0.760594	0.768345	0.756455	0.753046	0.761128	0.756694	0.76954	0.766568	0.759588	0.75982	0.782938	0.795714	0.785414	0.772849	0.811257	0.801939	0.802904	0.831276	0.844563	0.839875	0.833387	0.822138	2.38952	2.19559	2.1718	2.14381	0.975771	0.963115	0.953565	0.949111
2672	0.807448	0.811993	0.801771	0.805916	0.813485	0.818309	0.809979	0.820086	0.805997	0.801707	0.809313	0.807469	0.821244	0.817014	0.81017	0.810027	0.831881	0.846269	0.832861	0.822125	0.861192	0.852954	0.853415	0.880463	0.89513	0.889139	0.882707	0.873823	2.46339	2.2667	2.23828	2.21196	1.03041	1.01651	1.00867	1.0038
2674	0.860406	0.863307	0.85168	0.859887	0.863788	0.868982	0.861904	0.873023	0.858027	0.853732	0.859626	0.857299	0.874733	0.868727	0.861157	0.862541	0.882263	0.898078	0.883163	0.87186	0.914983	0.908278	0.905886	0.932912	0.947475	0.940378	0.935506	0.929288	2.53524	2.3364	2.30428	2.28294	1.08585	1.0713	1.06419	1.05947
2676	0.917368	0.916715	0.903862	0.918635	0.916286	0.921494	0.917625	0.928794	0.913654	0.90988	0.913316	0.908629	0.930688	0.923785	0.915293	0.918398	0.93553	0.951089	0.935951	0.923826	0.970109	0.963884	0.960055	0.987751	1.00242	0.994106	0.989326	0.983743	2.60746	2.40215	2.36915	2.35123	1.14473	1.12862	1.12275	1.11816
2678	0.974928	0.971813	0.958567	0.97709	0.97111	0.976014	0.973728	0.986048	0.970518	0.966097	0.968799	0.962386	0.987384	0.980713	0.970449	0.975508	0.992548	1.00588	0.991961	0.977465	1.02746	1.0195	1.01625	1.04478	1.06265	1.05226	1.04644	1.03761	2.68278	2.4696	2.43619	2.4183	1.207	1.1886	1.18468	1.17974
2680	1.03359	1.03003	1.01695	1.03455	1.03071	1.03491	1.03137	1.04631	1.02882	1.02261	1.02843	1.02068	1.04463	1.04056	1.02796	1.03452	1.0552	1.06477	1.05387	1.03486	1.08881	1.07866	1.07645	1.10555	1.12641	1.11474	1.10781	1.09482	2.7636	2.54366	2.50663	2.48806	1.27501	1.25232	1.25031	1.24459
2682	1.09581	1.09279	1.08017	1.09475	1.09569	1.09894	1.09328	1.11045	1.09097	1.08307	1.09276	1.08415	1.10564	1.10453	1.09019	1.09732	1.12224	1.12775	1.12064	1.0977	1.15389	1.14187	1.14087	1.17104	1.1942	1.18171	1.17382	1.15937	2.8553	2.63249	2.58449	2.56587	1.34942	1.32253	1.32205	1.31527
2684	1.16333	1.16117	1.14822	1.1606	1.16583	1.1683	1.16179	1.1788	1.1599	1.15155	1.16104	1.15352	1.1747	1.17378	1.15894	1.16605	1.19423	1.19949	1.1948	1.16879	1.22666	1.21487	1.21284	1.24495	1.26858	1.25585	1.24851	1.2363	2.95051	2.72716	2.67116	2.65454	1.42364	1.39475	1.39427	1.38849
2686	1.23994	1.2395	1.22522	1.23719	1.24541	1.24713	1.24161	1.25453	1.24109	1.23495	1.23647	1.23303	1.25464	1.25252	1.23975	1.24505	1.27304	1.2806	1.27607	1.25161	1.30547	1.29509	1.29153	1.32578	1.34525	1.33349	1.32758	1.31879	3.04464	2.81471	2.76093	2.74502	1.49783	1.46707	1.46369	1.46268
2688	1.32231	1.32362	1.30882	1.32027	1.33018	1.33117	1.32683	1.33594	1.3277	1.32348	1.31731	1.31699	1.33952	1.33641	1.32715	1.32919	1.35524	1.36393	1.35841	1.33829	1.38785	1.3766	1.37143	1.4086	1.42419	1.41277	1.40835	1.40006	3.1428	2.90114	2.85695	2.83446	1.57468	1.54288	1.53518	1.54007
2690	1.40739	1.40894	1.3942	1.40468	1.41588	1.41644	1.41238	1.42174	1.41297	1.40726	1.4029	1.40017	1.42578	1.42115	1.41548	1.41386	1.44216	1.45008	1.44297	1.42418	1.47771	1.46382	1.45371	1.4969	1.5083	1.49645	1.49442	1.48353	3.24281	2.99229	2.95932	2.92874	1.65466	1.62231	1.61216	1.62063
2692	1.49896	1.49917	1.48466	1.49417	1.50602	1.50653	1.50247	1.51459	1.50115	1.49133	1.49672	1.48652	1.51703	1.50996	1.5087	1.50252	1.53441	1.54119	1.532	1.51342	1.57256	1.55547	1.54087	1.58903	1.5979	1.58455	1.58384	1.57143	3.34969	3.09404	3.06285	3.02799	1.74439	1.71097	1.70104	1.7076
2694	1.59531	1.5948	1.57997	1.58925	1.6007	1.60124	1.59687	1.61236	1.59383	1.58026	1.59406	1.57734	1.61287	1.60391	1.60527	1.59651	1.62913	1.63718	1.62601	1.60644	1.67058	1.65013	1.63514	1.6826	1.6967	1.68129	1.67959	1.66846	3.46397	3.20914	3.17329	3.1378	1.83727	1.80675	1.79809	1.79971
2696	1.69813	1.69928	1.68008	1.6925	1.7028	1.70337	1.69749	1.71671	1.69526	1.67955	1.69474	1.67761	1.71652	1.70708	1.70655	1.70096	1.72933	1.74096	1.72765	1.70646	1.77396	1.75115	1.74041	1.78257	1.80071	1.78506	1.78221	1.7742	3.57458	3.32337	3.28552	3.25367	1.92587	1.90083	1.8933	1.89166
2698	1.80861	1.81366	1.78771	1.80538	1.81336	1.81358	1.80495	1.82832	1.80548	1.78865	1.80098	1.78691	1.82696	1.81873	1.81443	1.81498	1.83465	1.84888	1.83399	1.81296	1.87874	1.85481	1.84917	1.88567	1.90463	1.88839	1.8851	1.87914	3.68538	3.4322	3.39333	3.36605	2.01715	1.99559	1.98864	1.98518
2700	1.91901	1.92753	1.89827	1.91781	1.92467	1.92489	1.91427	1.93995	1.91557	1.89965	1.90749	1.89519	1.93711	1.92987	1.92295	1.92766	1.94401	1.95876	1.94378	1.92248	1.98504	1.96172	1.95599	1.99132	2.01301	1.99352	1.98978	1.98219	3.79605	3.54244	3.50331	3.47857	2.11126	2.09163	2.08516	2.07994
2702	2.03178	2.03937	2.01171	2.02623	2.03734	2.0392	2.028	2.05245	2.02622	2.01446	2.01546	2.00433	2.04883	2.04153	2.03319	2.03983	2.06114	2.07341	2.06028	2.04121	2.0935	2.07408	2.06506	2.10321	2.12314	2.10026	2.0973	2.08622	3.9029	3.65113	3.6114	3.58947	2.2112	2.18953	2.18281	2.17551
2704	2.14832	2.1521	2.12912	2.13511	2.1525	2.15619	2.14446	2.1665	2.13895	2.13236	2.12617	2.11615	2.16199	2.15557	2.14632	2.15275	2.17828	2.18798	2.17698	2.16227	2.20191	2.18578	2.17576	2.21605	2.23371	2.20749	2.20666	2.19119	4.01648	3.7618	3.71672	3.69729	2.31832	2.29589	2.28552	2.27553
2706	2.2633	2.26478	2.24394	2.24669	2.26691	2.27151	2.25821	2.27967	2.25167	2.24695	2.23843	2.22846	2.27532	2.27029	2.2599	2.26282	2.2908	2.30325	2.29234	2.27706	2.31812	2.29881	2.29206	2.33322	2.34728	2.31931	2.32236	2.30136	4.12832	3.87248	3.82368	3.80719	2.42092	2.39852	2.38574	2.37365
2708	2.38195	2.38291	2.35939	2.36726	2.38406	2.38953	2.374	2.397	2.3694	2.36268	2.35833	2.34718	2.39468	2.39118	2.37961	2.37379	2.40357	2.41999	2.40847	2.39203	2.43661	2.41216	2.41144	2.45192	2.45678	2.42919	2.43639	2.41158	4.23282	3.97654	3.92674	3.91056	2.52091	2.4905	2.48113	2.46761
2710	2.49865	2.4993	2.47384	2.4874	2.49994	2.50522	2.48811	2.51207	2.48581	2.47512	2.47657	2.464	2.51057	2.50998	2.49716	2.48306	2.5134	2.53044	2.51905	2.50242	2.54632	2.52028	2.52353	2.56072	2.56315	2.53689	2.54359	2.51863	4.33855	4.082	4.03284	4.00605	2.61812	2.57858	2.57609	2.56148
2712	2.60791	2.60608	2.58095	2.59601	2.61212	2.61526	2.59849	2.61957	2.59637	2.57983	2.5851	2.57292	2.61765	2.62168	2.60421	2.58997	2.62709	2.63835	2.62942	2.60708	2.65331	2.62984	2.63445	2.66481	2.66677	2.64778	2.64931	2.62908	4.43398	4.18126	4.13743	4.09955	2.70181	2.65843	2.66012	2.64854
2714	2.71772	2.71027	2.68775	2.70079	2.72703	2.72574	2.71181	2.72624	2.70788	2.68298	2.69095	2.68135	2.72249	2.73565	2.70906	2.69932	2.74009	2.74175	2.73454	2.71057	2.75217	2.73239	2.73947	2.76223	2.75872	2.745	2.74387	2.72763	4.52347	4.26783	4.2238	4.18248	2.77768	2.73629	2.73449	2.73511
2716	2.81583	2.80494	2.78532	2.79492	2.8268	2.82168	2.8116	2.82198	2.80466	2.77631	2.7837	2.77498	2.81575	2.83494	2.80218	2.79511	2.83337	2.83313	2.82277	2.80275	2.84258	2.82006	2.82923	2.84847	2.84754	2.82959	2.82934	2.81325	4.60926	4.35251	4.30447	4.26227	2.84564	2.81094	2.80305	2.81777
2718	2.90001	2.892	2.8672	2.87772	2.90665	2.90078	2.89629	2.90836	2.8846	2.86095	2.86544	2.85266	2.90332	2.91613	2.88394	2.87563	2.91927	2.92201	2.90362	2.89097	2.93084	2.90264	2.91478	2.93125	2.92608	2.90643	2.90762	2.89474	4.67106	4.42163	4.37457	4.33628	2.90598	2.8719	2.86258	2.87863
2720	2.97771	2.9767	2.94461	2.95772	2.97897	2.97221	2.97405	2.98963	2.95759	2.941	2.94298	2.92294	2.98381	2.98905	2.96195	2.94967	2.99309	2.99625	2.97368	2.97061	2.99592	2.97026	2.98461	2.99965	2.98234	2.96593	2.96414	2.9527	4.7292	4.47782	4.42711	4.39151	2.97036	2.93152	2.92756	2.93121
2722	3.0323	3.03518	3.0031	3.0148	3.03068	3.02276	3.02538	3.04424	3.00778	2.99663	2.99592	2.97331	3.03486	3.03916	3.01546	3.00241	3.04434	3.04852	3.03111	3.01894	3.04294	3.02579	3.03346	3.05255	3.0338	3.02068	3.01259	2.99656	4.77922	4.529	4.4801	4.44464	3.01853	2.98206	2.98316	2.97417
2724	3.07429	3.07471	3.04425	3.05391	3.07407	3.06546	3.06203	3.08331	3.04795	3.03945	3.03494	3.01859	3.07236	3.07913	3.05448	3.04511	3.09516	3.09728	3.08578	3.05596	3.08425	3.07744	3.07666	3.1011	3.0724	3.06385	3.05082	3.03361	4.80206	4.55453	4.51608	4.48545	3.04158	3.01219	3.01164	3.00075
2726	3.10882	3.10573	3.0803	3.0863	3.11067	3.10052	3.0908	3.11376	3.0816	3.07412	3.06661	3.05646	3.10019	3.11135	3.08737	3.07971	3.12794	3.12649	3.11855	3.08291	3.10717	3.10258	3.10066	3.12629	3.09359	3.08509	3.06615	3.05608	4.8235	4.56822	4.52961	4.50111	3.05908	3.04015	3.03466	3.02784
2728	3.12173	3.11539	3.0959	3.09837	3.12183	3.1103	3.10088	3.12437	3.09412	3.08454	3.07915	3.06767	3.10921	3.12152	3.10144	3.09304	3.13205	3.13084	3.12734	3.09047	3.12434	3.10817	3.1066	3.13181	3.11227	3.10042	3.07733	3.07586	4.83934	4.58103	4.54138	4.50934	3.07293	3.05926	3.04988	3.04779
2730	3.11772	3.10779	3.09166	3.09321	3.11662	3.10304	3.09981	3.12446	3.09562	3.07706	3.08039	3.06368	3.10878	3.11782	3.10661	3.09356	3.12999	3.12593	3.12992	3.09178	3.13747	3.10973	3.10787	3.13392	3.1212	3.10963	3.08429	3.09026	4.84118	4.5851	4.54836	4.51395	3.09139	3.06858	3.05715	3.06023
2732	3.10882	3.09667	3.08147	3.08377	3.10806	3.09341	3.09496	3.121	3.09341	3.06678	3.07756	3.05659	3.10557	3.11112	3.10756	3.09024	3.12626	3.12105	3.12817	3.09095	3.13666	3.10863	3.10717	3.13332	3.11653	3.10879	3.08318	3.09154	4.83819	4.58104	4.55077	4.5186	3.11111	3.08006	3.06616	3.0774
2734	3.1004	3.09032	3.0737	3.07769	3.10122	3.08759	3.08773	3.11212	3.08787	3.06125	3.06976	3.04993	3.09932	3.10517	3.10055	3.08662	3.11877	3.11712	3.11105	3.08382	3.11959	3.1041	3.10031	3.12496	3.10629	3.10123	3.07884	3.08252	4.83532	4.57627	4.55156	4.5245	3.12109	3.08828	3.07479	3.0881
2736	3.08218	3.08023	3.06033	3.06605	3.08898	3.07651	3.07306	3.08876	3.07537	3.05046	3.04917	3.03677	3.08554	3.09331	3.08177	3.07872	3.10736	3.11204	3.08838	3.06673	3.10223	3.099	3.09219	3.11387	3.10001	3.09539	3.07579	3.07503	4.82922	4.57398	4.55089	4.52667	3.13143	3.10026	3.08815	3.09566
2738	3.06715	3.07087	3.04773	3.0556	3.07791	3.06752	3.0612	3.07017	3.06412	3.0416	3.03317	3.0254	3.07555	3.08396	3.06606	3.07054	3.0972	3.10723	3.079	3.05521	3.09441	3.09299	3.08937	3.10636	3.0963	3.08822	3.07674	3.07577	4.81931	4.57098	4.54441	4.52428	3.1433	3.11845	3.10619	3.10652
2740	3.06024	3.06102	3.04213	3.04842	3.0684	3.06117	3.05361	3.06529	3.05145	3.03555	3.02706	3.0173	3.07	3.07832	3.05586	3.05795	3.07841	3.09738	3.07222	3.04914	3.08633	3.07873	3.08508	3.09649	3.09367	3.07889	3.07953	3.07851	4.81618	4.57022	4.5385	4.52198	3.15868	3.13262	3.12253	3.11759
2742	3.05208	3.04495	3.03504	3.03627	3.05533	3.05204	3.04364	3.06212	3.03286	3.02661	3.02046	3.00771	3.06407	3.07095	3.04139	3.03904	3.06053	3.08872	3.06621	3.04282	3.0828	3.06822	3.08132	3.08985	3.09412	3.07855	3.08196	3.08036	4.82154	4.57671	4.54378	4.52441	3.19273	3.15795	3.15125	3.1413
2744	3.04809	3.03621	3.03042	3.02913	3.04825	3.04735	3.03883	3.05997	3.02446	3.02207	3.01812	3.00321	3.06179	3.06754	3.03467	3.02987	3.06024	3.08596	3.06023	3.04172	3.08566	3.06882	3.08053	3.09419	3.09834	3.09239	3.08498	3.07864	4.82925	4.58732	4.56153	4.5317	3.22365	3.18598	3.18138	3.16863
2746	3.04987	3.04003	3.03188	3.03099	3.04976	3.04692	3.03614	3.05641	3.02874	3.02217	3.02184	3.00451	3.06068	3.06912	3.04177	3.03292	3.07365	3.08372	3.0496	3.04819	3.08956	3.07224	3.08042	3.10753	3.10299	3.10732	3.08805	3.07578	4.83673	4.59373	4.57507	4.53878	3.24414	3.20769	3.20228	3.19034
2748	3.05213	3.04688	3.03526	3.03456	3.0529	3.04659	3.03237	3.05185	3.03437	3.02221	3.02645	3.00626	3.05842	3.07085	3.0518	3.03778	3.08444	3.08048	3.04259	3.05383	3.09094	3.07335	3.08048	3.11534	3.10713	3.11024	3.09016	3.07432	4.85309	4.60326	4.57511	4.54439	3.26933	3.24115	3.23253	3.22233
2750	3.05008	3.04666	3.03486	3.03349	3.05048	3.04375	3.02877	3.04774	3.03287	3.01915	3.02544	3.00386	3.05378	3.06698	3.05183	3.03601	3.08205	3.0697	3.04272	3.04964	3.09075	3.07282	3.07864	3.11209	3.11219	3.10428	3.09479	3.0717	4.86637	4.61206	4.57142	4.55494	3.28885	3.26795	3.25746	3.24983
2752	3.04019	3.03436	3.02499	3.02026	3.0371	3.03406	3.01902	3.04055	3.02261	3.00953	3.0147	2.99741	3.04543	3.05048	3.03737	3.02453	3.07351	3.05181	3.0429	3.03561	3.08825	3.07012	3.07373	3.10418	3.11273	3.09643	3.09758	3.06868	4.86388	4.61164	4.56834	4.56071	3.31254	3.28232	3.27281	3.26713
2754	3.02557	3.01712	3.00863	3.00153	3.01896	3.02035	3.00537	3.03025	3.00866	2.99554	2.99978	2.98863	3.03451	3.02986	3.01765	3.00972	3.06291	3.03872	3.03624	3.01975	3.07737	3.06086	3.06691	3.09446	3.09818	3.08443	3.09116	3.06312	4.85163	4.60574	4.56483	4.55498	3.3387	3.29838	3.2905	3.28432
2756	3.00289	2.99599	2.9867	2.98217	2.99697	2.9985	2.98557	3.01046	2.98754	2.97403	2.97771	2.96958	3.01309	3.00673	2.99487	2.98996	3.03424	3.01953	3.00209	2.99751	3.04694	3.03695	3.04311	3.06712	3.07509	3.06451	3.07538	3.04809	4.84184	4.59965	4.56049	4.54415	3.35189	3.30946	3.30282	3.29534
2758	2.95857	2.95535	2.94007	2.94756	2.95871	2.95593	2.94876	2.97012	2.94538	2.93531	2.93419	2.9276	2.97365	2.96832	2.9551	2.95301	2.99024	2.99385	2.9566	2.9605	3.01496	3.00965	3.01201	3.03314	3.06027	3.04929	3.06058	3.03275	4.82909	4.59115	4.55631	4.537	3.36376	3.32834	3.32184	3.31011
2760	2.91398	2.91291	2.89107	2.90998	2.91864	2.91367	2.91032	2.93039	2.90515	2.89704	2.89294	2.88591	2.93507	2.93075	2.91656	2.91652	2.95196	2.96478	2.92551	2.9255	2.98635	2.98296	2.98621	3.00409	3.04162	3.02963	3.03712	3.01104	4.80996	4.57205	4.54294	4.52974	3.37611	3.35253	3.34562	3.32937
2762	2.87297	2.87083	2.85557	2.86825	2.87458	2.87378	2.86726	2.89101	2.8671	2.8568	2.85421	2.84254	2.88971	2.89036	2.88208	2.87917	2.90754	2.91381	2.89229	2.88298	2.94885	2.94423	2.94933	2.96686	3.02215	3.00531	3.00426	2.97961	4.79527	4.55499	4.53022	4.52177	3.38938	3.36669	3.35882	3.34504
2764	2.82685	2.82129	2.81572	2.81298	2.82162	2.82849	2.8156	2.84414	2.82201	2.80749	2.80845	2.79148	2.83799	2.84229	2.84176	2.83422	2.86322	2.86242	2.85916	2.83629	2.91912	2.91117	2.91435	2.9359	3.00671	2.98789	2.98231	2.95912	4.77761	4.54159	4.52601	4.51472	3.41118	3.38431	3.37248	3.37443
2766	2.7916	2.78342	2.77911	2.77087	2.78367	2.7907	2.77594	2.8055	2.78691	2.76965	2.77271	2.7529	2.79951	2.80524	2.8058	2.79552	2.82748	2.8245	2.82057	2.80131	2.88855	2.8812	2.88515	2.91175	2.97964	2.96471	2.95853	2.94437	4.76434	4.53174	4.52047	4.49881	3.43547	3.40679	3.39079	3.40727
2768	2.75508	2.74759	2.73574	2.7322	2.75318	2.75114	2.73691	2.7598	2.75047	2.73093	2.73211	2.71566	2.76092	2.76582	2.75927	2.7525	2.78777	2.78633	2.76569	2.7595	2.8573	2.84938	2.85311	2.88582	2.95856	2.94617	2.93847	2.9325	4.76796	4.53523	4.5184	4.48692	3.47281	3.43795	3.42301	3.43973
2770	2.71955	2.7142	2.68853	2.69463	2.72591	2.71605	2.70241	2.71758	2.71547	2.69474	2.69365	2.68275	2.72844	2.73014	2.71404	2.71418	2.7582	2.75948	2.73152	2.72585	2.84312	2.83302	2.83539	2.87165	2.95177	2.94283	2.9349	2.92902	4.78667	4.55283	4.52722	4.49263	3.52868	3.49258	3.48493	3.49508
2772	2.69789	2.69526	2.66502	2.67713	2.70737	2.69706	2.68461	2.69969	2.69327	2.67505	2.67414	2.66418	2.71097	2.71286	2.69473	2.69566	2.73911	2.73973	2.7231	2.71532	2.83389	2.82303	2.82905	2.86508	2.94816	2.9455	2.93838	2.93211	4.80668	4.57338	4.54315	4.51034	3.5821	3.55163	3.54912	3.55136
2774	2.67456	2.67634	2.65532	2.66521	2.68399	2.67813	2.66689	2.68892	2.67126	2.65555	2.65798	2.64733	2.6946	2.69817	2.6836	2.67993	2.71866	2.72265	2.71999	2.70889	2.82756	2.81589	2.82519	2.86077	2.95018	2.9507	2.94401	2.93727	4.82665	4.59111	4.55811	4.52859	3.63967	3.61051	3.60739	3.60762
2776	2.65775	2.66219	2.64952	2.65694	2.66612	2.66524	2.65424	2.68226	2.65598	2.64204	2.6476	2.63592	2.68526	2.6881	2.67654	2.66961	2.70932	2.71748	2.71825	2.70531	2.82702	2.81639	2.82359	2.86071	2.96074	2.96162	2.95678	2.9427	4.85669	4.62175	4.58807	4.5576	3.70677	3.67997	3.67419	3.67785
2778	2.65448	2.65722	2.64573	2.65454	2.662	2.66473	2.65082	2.67841	2.65103	2.63839	2.64599	2.63125	2.68433	2.68452	2.67332	2.66792	2.70862	2.72331	2.70926	2.69891	2.82857	2.82171	2.82279	2.86478	2.97754	2.98015	2.9811	2.95182	4.88926	4.6586	4.62972	4.60049	3.78494	3.75827	3.74932	3.75428
2780	2.65494	2.65307	2.64069	2.65254	2.66146	2.66997	2.64983	2.67448	2.64799	2.63592	2.64749	2.62783	2.68605	2.68249	2.67133	2.66971	2.71112	2.73217	2.70038	2.69067	2.834	2.83095	2.82577	2.87183	2.99839	3.0013	3.00572	2.9638	4.9396	4.70619	4.67412	4.64341	3.8922	3.86199	3.85318	3.85035
2782	2.65956	2.65313	2.63913	2.65417	2.66337	2.67587	2.65195	2.67574	2.65015	2.63766	2.65157	2.62976	2.68961	2.68487	2.67291	2.67536	2.71881	2.73953	2.70577	2.69174	2.85535	2.85225	2.84274	2.88997	3.04056	3.03912	3.04113	2.9979	5.00397	4.77091	4.73714	4.70434	4.01396	3.98417	3.97533	3.96264
2784	2.677	2.66966	2.65534	2.66854	2.67716	2.68969	2.66755	2.69341	2.6707	2.65471	2.66596	2.64672	2.70629	2.70387	2.68959	2.69548	2.7389	2.75368	2.73285	2.71358	2.89534	2.89054	2.88517	2.9298	3.09102	3.08878	3.08737	3.0538	5.06866	4.83601	4.80805	4.778	4.14051	4.11148	4.09778	4.08239
2786	2.705	2.69949	2.69272	2.69452	2.70217	2.71144	2.69361	2.72325	2.70412	2.68377	2.68925	2.67337	2.73137	2.73518	2.71868	2.72636	2.76204	2.77293	2.7647	2.74443	2.9364	2.92829	2.93105	2.96891	3.14249	3.13965	3.13483	3.10944	5.15607	4.91167	4.88605	4.85534	4.28361	4.25554	4.23636	4.22238
2788	2.73267	2.72681	2.72543	2.71968	2.72757	2.73282	2.71874	2.75356	2.73272	2.71203	2.71304	2.69886	2.7559	2.76505	2.74558	2.75507	2.7882	2.80558	2.79776	2.77419	2.9853	2.97455	2.97793	3.00643	3.21185	3.20332	3.19808	3.17628	5.25634	5.00342	4.98345	4.95118	4.44025	4.41206	4.38993	4.37841
2790	2.77662	2.77194	2.75732	2.7561	2.77167	2.77179	2.7599	2.79861	2.77045	2.75567	2.75146	2.7413	2.79785	2.80753	2.78895	2.79296	2.83303	2.85539	2.84155	2.82348	3.0427	3.03294	3.03494	3.05288	3.28472	3.27508	3.27196	3.25241	5.35915	5.10295	5.08601	5.05492	4.61555	4.57779	4.55766	4.54844
2792	2.82709	2.82466	2.79584	2.80149	2.82455	2.81917	2.80849	2.85003	2.81454	2.80574	2.79842	2.79023	2.84484	2.85654	2.8422	2.83711	2.87966	2.90404	2.88736	2.87656	3.10194	3.09146	3.09422	3.10489	3.36001	3.35906	3.35395	3.33439	5.47577	5.21599	5.19631	5.16432	4.81319	4.76068	4.74659	4.74019
2794	2.87094	2.86694	2.83741	2.84702	2.87149	2.86477	2.85299	2.89655	2.86027	2.84975	2.84758	2.83454	2.89002	2.90532	2.89241	2.88302	2.93204	2.9559	2.93973	2.92378	3.17214	3.16171	3.16908	3.17709	3.4475	3.46579	3.45451	3.43514	5.60278	5.3432	5.32102	5.28831	5.03237	4.96629	4.95917	4.95399
2796	2.92419	2.91601	2.89888	2.90523	2.92569	2.92245	2.90396	2.94801	2.91956	2.90093	2.91102	2.88773	2.94699	2.96569	2.95047	2.93891	2.99763	3.01533	2.99924	2.97879	3.25046	3.24164	3.25636	3.26284	3.54838	3.57708	3.56386	3.54556	5.74557	5.49123	5.46024	5.42456	5.28638	5.20997	5.21143	5.20146
2798	2.98333	2.97065	2.96748	2.96861	2.98462	2.98461	2.9603	3.00358	2.98366	2.9588	2.9769	2.94583	3.00773	3.0297	3.01353	3.001	3.06886	3.07966	3.06475	3.04119	3.33793	3.33184	3.34716	3.35228	3.67916	3.69159	3.68331	3.66798	5.90518	5.66608	5.62519	5.58851	5.56672	5.48888	5.49802	5.47971
2800	3.05581	3.03732	3.03431	3.0363	3.05643	3.05523	3.03182	3.07288	3.05402	3.03288	3.04716	3.01807	3.08221	3.10001	3.08501	3.07557	3.15501	3.15833	3.15023	3.12281	3.43989	3.44258	3.45046	3.45535	3.82638	3.81686	3.8162	3.80745	6.07304	5.84727	5.8057	5.77479	5.86038	5.78991	5.79963	5.77589
2802	3.1448	3.1211	3.11368	3.11577	3.14488	3.13877	3.11956	3.15709	3.13471	3.12415	3.12714	3.10543	3.17018	3.18112	3.16816	3.1635	3.24755	3.24295	3.24116	3.2169	3.54664	3.55731	3.55916	3.56699	3.96994	3.95385	3.95552	3.95089	6.25214	6.0275	5.99009	5.9674	6.17697	6.12079	6.11808	6.0938
2804	3.22737	3.2054	3.19445	3.19565	3.22918	3.22182	3.20297	3.23716	3.2148	3.20991	3.20389	3.18861	3.25516	3.26347	3.2524	3.24975	3.33525	3.3277	3.32548	3.30576	3.65754	3.67085	3.66724	3.68577	4.11768	4.10867	4.10157	4.09826	6.4548	6.22572	6.18927	6.1736	6.54357	6.49746	6.4788	6.45707
2806	3.30057	3.29231	3.27501	3.27628	3.30877	3.30624	3.28366	3.31702	3.29676	3.28902	3.28243	3.27016	3.3431	3.35168	3.34291	3.33709	3.42587	3.42027	3.4135	3.39609	3.77967	3.7941	3.78299	3.81796	4.28343	4.28435	4.26566	4.26258	6.69505	6.46358	6.42293	6.40914	6.99118	6.93647	6.90925	6.89224
2808	3.37793	3.38608	3.36261	3.36366	3.39364	3.39664	3.37033	3.40381	3.38594	3.37233	3.36902	3.35805	3.43834	3.44898	3.44181	3.43094	3.52431	3.52108	3.50789	3.49518	3.91873	3.93271	3.91576	3.96411	4.48162	4.48726	4.46301	4.45751	6.98579	6.76287	6.71933	6.69291	7.52607	7.45485	7.4254	7.41571
2810	3.47269	3.48574	3.45857	3.46096	3.49168	3.49674	3.46929	3.50193	3.48671	3.46828	3.46817	3.45896	3.54522	3.55674	3.54652	3.53416	3.63662	3.63699	3.61396	3.61235	4.08686	4.10062	4.07904	4.13136	4.7166	4.72665	4.7057	4.69328	7.31961	7.11181	7.07859	7.0352	8.13812	8.06139	8.02889	8.0241
2812	3.59525	3.59807	3.57331	3.57731	3.61194	3.61552	3.58916	3.62112	3.60764	3.58515	3.59051	3.58182	3.67158	3.68202	3.66374	3.65261	3.76464	3.76949	3.7352	3.75487	4.27814	4.29335	4.27061	4.32007	4.98377	4.99552	4.98153	4.96397	7.70128	7.50125	7.47815	7.42846	8.84876	8.7886	8.74717	8.73526
2814	3.72866	3.72006	3.70033	3.70404	3.74196	3.74343	3.71912	3.7483	3.73782	3.71407	3.72128	3.71218	3.80556	3.8182	3.79308	3.78307	3.90385	3.91417	3.87431	3.90552	4.48763	4.50552	4.48431	4.52889	5.29462	5.29342	5.28864	5.271	8.14995	7.95567	7.92682	7.88909	9.68972	9.65886	9.60671	9.5827
2816	3.86508	3.85262	3.83319	3.83628	3.87583	3.87707	3.85737	3.87727	3.87524	3.85223	3.85475	3.84301	3.94682	3.96612	3.94056	3.93139	4.0628	4.07968	4.04537	4.06167	4.72635	4.75014	4.73558	4.76778	5.65511	5.63502	5.64119	5.62717	8.67522	8.48475	8.44902	8.43123	10.7083	10.6782	10.618	10.5963
2818	4.01384	4.0003	3.98078	3.98197	4.02149	4.02236	4.00975	4.01688	4.02765	4.00527	4.00081	3.98305	4.10108	4.1309	4.11122	4.10061	4.23787	4.25795	4.23495	4.23062	4.99676	5.02465	5.0168	5.03607	6.07029	6.03933	6.04674	6.0322	9.31698	9.11589	9.07959	9.05921	11.9804	11.9271	11.8607	11.8751
2820	4.16505	4.15243	4.13265	4.13135	4.17291	4.17369	4.16213	4.1646	4.18494	4.16438	4.15431	4.13315	4.26374	4.30042	4.28611	4.27163	4.42108	4.44007	4.42946	4.41095	5.31906	5.33702	5.32229	5.33854	6.56409	6.54709	6.53374	6.51062	10.0692	9.86469	9.86028	9.81875	13.4554	13.3874	13.3168	13.3734
2822	4.32083	4.31323	4.28575	4.28494	4.33627	4.33663	4.31586	4.32685	4.35056	4.3326	4.32238	4.30298	4.44253	4.47632	4.46375	4.44425	4.62032	4.63304	4.63726	4.60957	5.69034	5.69432	5.66267	5.68287	7.11749	7.12849	7.09246	7.05943	10.9259	10.7138	10.7382	10.6856	15.1869	15.0674	14.996	15.067
2824	4.48267	4.48177	4.44533	4.44555	4.50866	4.5084	4.47563	4.4995	4.52464	4.50907	4.50136	4.48559	4.6334	4.66076	4.64712	4.62471	4.8327	4.83777	4.8535	4.82206	6.0809	6.08105	6.03753	6.06096	7.73241	7.75364	7.7108	7.66315	11.9378	11.7191	11.7224	11.6597	17.199	17.0503	16.9924	17.0474
2826	4.64704	4.64734	4.60729	4.60778	4.67854	4.68025	4.64328	4.67355	4.70139	4.6876	4.68034	4.66782	4.83028	4.85209	4.83231	4.81584	5.0613	5.06176	5.08282	5.04571	6.5027	6.51272	6.47018	6.4973	8.42204	8.44729	8.41998	8.35426	13.0313	12.8292	12.8225	12.7764	19.3157	19.1451	19.0989	19.1315
2828	4.81991	4.81727	4.77472	4.77548	4.85112	4.85722	4.82915	4.85645	4.88597	4.87541	4.86574	4.85621	5.03979	5.05744	5.02534	5.02492	5.30741	5.30368	5.32466	5.28877	6.94488	6.97011	6.94368	6.97114	9.13806	9.1683	9.15784	9.08266	14.2269	13.9921	13.9404	13.9117	21.729	21.4571	21.3909	21.4094
2830	4.99523	4.9906	4.94782	4.94753	5.02774	5.03728	5.01715	5.03983	5.07565	5.06472	5.05352	5.0457	5.25066	5.26645	5.22519	5.23681	5.55277	5.55062	5.56535	5.53686	7.40274	7.42759	7.41623	7.4383	9.92331	9.94418	9.91971	9.83862	15.5023	15.2662	15.1617	15.1053	24.0524	23.8227	23.7275	23.7307
2832	5.16825	5.1694	5.12633	5.12424	5.21095	5.22158	5.19624	5.21829	5.27301	5.25083	5.24386	5.23364	5.46021	5.47447	5.43474	5.44308	5.80597	5.81407	5.81249	5.79245	7.89085	7.90721	7.91859	7.92279	10.6986	10.7324	10.6985	10.6297	16.5834	16.4026	16.303	16.2681	25.8143	25.5751	25.4774	25.4559
2834	5.34482	5.36016	5.31587	5.31149	5.40434	5.41342	5.37657	5.39906	5.48123	5.44077	5.44217	5.42458	5.67137	5.68687	5.65776	5.65142	6.05672	6.06921	6.05502	6.05183	8.31956	8.34117	8.37455	8.36346	11.3359	11.3653	11.3329	11.2772	17.5777	17.3686	17.1469	17.1256	27.4052	27.047	26.9707	26.9093
2836	5.52299	5.54499	5.50541	5.49779	5.59678	5.59994	5.55709	5.57945	5.67819	5.62876	5.63395	5.61223	5.87168	5.89112	5.87256	5.85303	6.27949	6.29005	6.28071	6.28193	8.66957	8.70555	8.72398	8.72498	11.9349	11.9258	11.8936	11.8229	18.3528	18.1971	17.8923	17.8662	28.265	28.0112	27.9621	27.869
2838	5.70417	5.71746	5.6873	5.67977	5.78533	5.77588	5.74042	5.76294	5.85944	5.81551	5.81605	5.79502	6.06041	6.08619	6.07435	6.04788	6.48224	6.49393	6.49867	6.48652	8.97327	9.0325	9.02552	9.04676	12.3404	12.3311	12.3165	12.2495	18.6455	18.5196	18.3016	18.3379	28.2821	28.0866	28.0423	27.9502
2840	5.89418	5.89301	5.87124	5.86619	5.97791	5.95535	5.93135	5.95388	6.04176	6.00679	5.99933	5.98058	6.24892	6.28247	6.27412	6.24326	6.679	6.69313	6.70702	6.68018	9.18839	9.25814	9.24199	9.27126	12.4824	12.4688	12.4516	12.3994	18.8009	18.5694	18.3352	18.3744	28.205	27.9006	27.8437	27.7737
2842	6.09736	6.08576	6.06814	6.06085	6.18067	6.15379	6.13296	6.15219	6.23894	6.20582	6.19181	6.17686	6.44548	6.48756	6.47489	6.44292	6.87774	6.8946	6.90018	6.86912	9.35082	9.4098	9.39459	9.42417	12.576	12.5471	12.5101	12.4572	18.8712	18.5735	18.322	18.3074	28.0343	27.5913	27.5172	27.4781
2844	6.31849	6.30285	6.28366	6.26428	6.39634	6.37715	6.34843	6.36106	6.4607	6.4147	6.39636	6.38783	6.64954	6.70627	6.67542	6.64956	7.08163	7.10613	7.09081	7.05687	9.47689	9.52791	9.52002	9.54313	12.6036	12.5772	12.533	12.4788	18.6768	18.4481	18.2616	18.1953	26.879	26.6758	26.5977	26.567
2846	6.56637	6.54838	6.52446	6.49187	6.63458	6.62617	6.58692	6.59418	6.70515	6.64483	6.62348	6.6203	6.87645	6.94286	6.89392	6.87577	7.30503	7.33336	7.30304	7.2587	9.56244	9.61439	9.60269	9.61504	12.4765	12.4798	12.4441	12.4067	18.1103	17.9141	17.8263	17.799	25.0341	24.971	24.8822	24.8406
2848	6.85215	6.83084	6.79992	6.76515	6.90668	6.90384	6.86031	6.86815	6.9728	6.90998	6.88622	6.88282	7.14363	7.19856	7.15119	7.13666	7.55302	7.57869	7.54619	7.4859	9.63463	9.68976	9.66239	9.67034	12.262	12.2704	12.2237	12.2028	17.4972	17.2514	17.1471	17.0973	23.3606	23.2989	23.2014	23.1641
2850	7.18553	7.1638	7.12166	7.09753	7.22109	7.22164	7.17948	7.19259	7.27757	7.21924	7.1946	7.18444	7.45763	7.48073	7.45524	7.44289	7.83495	7.85387	7.82422	7.74729	9.71668	9.77568	9.72828	9.73659	12.1023	12.1087	12.0636	12.0364	16.7924	16.6056	16.5463	16.4623	21.6207	21.6099	21.5192	21.5167
2852	7.56751	7.5461	7.49675	7.48035	7.58769	7.59134	7.54703	7.56481	7.63145	7.57523	7.55185	7.53256	7.81858	7.8162	7.80945	7.79718	8.16849	8.17681	8.14623	8.0596	9.8451	9.90547	9.83765	9.85551	11.9425	11.9679	11.9498	11.9189	16.0931	15.9212	15.9106	15.8155	20.0483	20.01	19.9281	19.9566
2854	8.00966	7.98728	7.94167	7.91695	8.03495	8.03546	7.9779	7.99628	8.05468	7.9927	7.97289	7.94553	8.23957	8.2424	8.23052	8.21323	8.57498	8.56953	8.53029	8.45546	10.0412	10.1063	10.04	10.0705	11.8385	11.8617	11.8559	11.816	15.6598	15.4764	15.4411	15.3037	18.7667	18.7743	18.6997	18.7205
2856	8.53118	8.50698	8.47686	8.42995	8.57531	8.56515	8.48908	8.50694	8.56118	8.49066	8.47433	8.43871	8.73824	8.76401	8.73505	8.70747	9.06014	9.0429	8.98977	8.93652	10.3008	10.367	10.3098	10.3497	11.8932	11.8879	11.867	11.8121	15.3229	15.203	15.223	15.1085	17.6502	17.6866	17.6146	17.6115
2858	9.14705	9.1215	9.10095	9.03711	9.20206	9.18379	9.09488	9.11525	9.16094	9.08469	9.06984	9.02508	9.33872	9.37234	9.33141	9.29779	9.64708	9.63765	9.56294	9.50362	10.7282	10.7728	10.7051	10.7408	12.1187	12.1161	12.0756	12.0279	15.1425	15.028	15.0653	14.9835	17.028	16.9945	16.9261	16.9038
2860	9.90433	9.88231	9.85725	9.79087	9.95745	9.93551	9.846	9.87331	9.90332	9.82957	9.80851	9.75256	10.0923	10.1144	10.0694	10.0407	10.3693	10.3712	10.2706	10.2032	11.3035	11.3318	11.2649	11.274	12.4275	12.4531	12.4011	12.3812	15.2182	15.048	15.0213	14.9303	16.7001	16.6978	16.6455	16.6146
2862	10.79	10.7743	10.7449	10.6771	10.8372	10.8115	10.7242	10.7574	10.7734	10.7021	10.6705	10.6068	10.9674	10.9827	10.9345	10.9104	11.2053	11.2081	11.0916	11.0277	11.9825	11.9995	11.9315	11.9254	12.9421	12.937	12.8646	12.8437	15.4856	15.3215	15.2643	15.1217	16.4966	16.4956	16.4557	16.421
2864	11.8184	11.802	11.7521	11.6903	11.8627	11.8337	11.7434	11.7718	11.7883	11.7028	11.6627	11.611	11.9813	12.002	11.9357	11.9136	12.2283	12.2144	12.1002	12.0346	12.8537	12.8745	12.801	12.8062	13.6785	13.6528	13.5883	13.551	15.8398	15.7268	15.7195	15.5847	16.5078	16.4513	16.4147	16.3807
2866	13.0404	13.0203	12.9491	12.8916	13.0823	13.044	12.9486	12.9604	12.9964	12.8818	12.8281	12.8082	13.1589	13.214	13.1247	13.0908	13.3963	13.3437	13.242	13.2303	13.8357	13.8717	13.8099	13.8186	14.5012	14.4637	14.4071	14.3622	16.4718	16.2822	16.2444	16.1102	16.7764	16.6788	16.6599	16.6461
2868	14.3181	14.299	14.2196	14.1613	14.3567	14.3069	14.206	14.2061	14.2581	14.1255	14.0587	14.0549	14.3863	14.4734	14.3683	14.31	14.5999	14.5445	14.4597	14.4629	14.9485	14.9739	14.9074	14.8974	15.5237	15.4603	15.3865	15.3169	17.3058	17.0692	16.9842	16.8079	17.14	17.0544	17.0558	17.0743
2870	15.6933	15.6816	15.5452	15.5268	15.7288	15.6745	15.5755	15.5741	15.6228	15.4985	15.4329	15.4061	15.7405	15.8314	15.7099	15.6212	15.9156	15.8725	15.815	15.8097	16.1731	16.2024	16.1517	16.0912	16.5832	16.5223	16.4465	16.3702	18.0795	17.8471	17.7542	17.5818	17.5401	17.4379	17.4295	17.4742
2872	17.0723	17.0769	16.9204	16.9259	17.1043	17.0391	16.9386	16.9402	16.9832	16.8811	16.8126	16.7431	17.0693	17.1785	17.0563	16.9187	17.1423	17.0809	17.0439	17.1092	17.2669	17.2923	17.2738	17.1673	17.5617	17.4626	17.3786	17.3021	18.8705	18.6159	18.4378	18.2875	18.0414	17.9251	17.8758	17.9245
2874	18.149	18.146	18.0174	18.018	18.1775	18.118	17.9936	17.998	18.0498	17.9493	17.8706	17.7809	18.1371	18.2354	18.0946	17.9414	18.1596	18.0966	18.0686	18.1488	18.2931	18.2582	18.2266	18.1242	18.5175	18.3596	18.2687	18.1934	19.5659	19.3398	19.0993	18.992	18.4836	18.3804	18.2926	18.3424
2876	19.0633	19.0222	18.9113	18.9286	19.0914	19.0601	18.8876	18.8972	18.9775	18.856	18.7679	18.665	19.0915	19.1468	18.9518	18.8241	19.0652	18.9833	18.961	19.0781	19.1496	19.0843	19.0573	18.9522	19.2209	19.0686	18.9839	18.9151	20.127	19.9131	19.632	19.541	18.9177	18.7875	18.6723	18.7309
2878	19.7379	19.6726	19.6012	19.6058	19.7577	19.74	19.5464	19.5525	19.6497	19.5166	19.4169	19.3105	19.7615	19.8144	19.5958	19.4759	19.6931	19.5965	19.5685	19.7119	19.6957	19.6526	19.6193	19.488	19.7566	19.6023	19.4849	19.3811	20.6165	20.443	20.1205	19.9548	19.2626	19.1673	19.0314	19.0938
2880	20.1018	20.0436	19.9483	19.939	20.1034	20.08	19.9271	19.9128	19.9864	19.8634	19.7589	19.6804	20.1237	20.1883	19.9891	19.8529	20.1621	20.0864	20.0424	20.0544	20.1347	20.141	20.0725	19.919	20.1513	20.0356	19.8985	19.7588	20.8367	20.7339	20.4874	20.2862	19.3559	19.3256	19.1868	19.2434
2882	20.3778	20.3375	20.1877	20.1841	20.3665	20.3303	20.2237	20.1905	20.2346	20.1267	20.0175	19.9686	20.3936	20.4799	20.3055	20.1475	20.4916	20.3982	20.3409	20.3056	20.342	20.4117	20.3487	20.1764	20.2423	20.1819	20.0558	19.9164	20.8765	20.7351	20.5797	20.3871	19.3649	19.3464	19.2227	19.2602
2884	20.4866	20.462	20.3057	20.2928	20.4718	20.4219	20.3344	20.2943	20.3256	20.227	20.1114	20.0737	20.4722	20.5885	20.4362	20.255	20.5283	20.4064	20.3489	20.3694	20.3036	20.3766	20.3401	20.1691	20.2157	20.1497	20.0391	19.8839	20.8736	20.6822	20.575	20.3402	19.3544	19.3359	19.2312	19.2494
2886	20.349	20.336	20.2003	20.1646	20.344	20.2809	20.1925	20.1516	20.2006	20.0851	19.9728	19.9191	20.3256	20.4319	20.3059	20.1391	20.3776	20.2735	20.2195	20.2123	20.1992	20.2271	20.2057	20.0499	20.1589	20.072	19.978	19.7989	20.8415	20.6288	20.5458	20.2613	19.3408	19.311	19.2245	19.2293
2888	20.0696	20.0735	19.9044	19.8749	20.0831	20.0128	19.9229	19.8839	19.9562	19.8109	19.715	19.6359	20.0793	20.1437	20.0412	19.9192	20.184	20.1102	20.0599	19.9674	20.0834	20.0638	20.0493	19.9168	20.0456	19.9535	19.8748	19.7021	20.7423	20.5006	20.4632	20.1804	19.3233	19.2455	19.1998	19.1718
2890	19.8004	19.8254	19.6174	19.6046	19.8328	19.7649	19.6714	19.6444	19.715	19.5573	19.4809	19.3878	19.8426	19.8931	19.791	19.7001	19.9759	19.9085	19.8442	19.7412	19.8443	19.8186	19.8316	19.7284	19.8261	19.7133	19.6484	19.5214	20.6404	20.3374	20.2997	20.0297	19.3151	19.2046	19.1843	19.135
2892	19.4974	19.5288	19.3299	19.3115	19.5427	19.4704	19.3872	19.3724	19.4147	19.2634	19.2081	19.1165	19.5413	19.6049	19.4973	19.4045	19.6766	19.6383	19.5391	19.4412	19.5502	19.5286	19.5446	19.4775	19.6126	19.4769	19.4039	19.3178	20.5127	20.2087	20.1616	19.8973	19.322	19.2131	19.191	19.1541
2894	19.1857	19.2114	19.0255	19.0016	19.2331	19.1594	19.0852	19.0818	19.0996	18.9563	18.9218	18.8359	19.2306	19.3059	19.1861	19.0924	19.386	19.3741	19.2525	19.1378	19.309	19.2976	19.2938	19.2374	19.3908	19.2682	19.1864	19.1249	20.3166	20.0469	19.9732	19.7482	19.348	19.2449	19.2159	19.2061
2896	18.8944	18.901	18.7371	18.7026	18.9116	18.8486	18.7607	18.7753	18.7968	18.6547	18.6286	18.5372	18.9193	19.0109	18.8828	18.8039	19.0901	19.0675	18.9365	18.8292	19.0628	19.0461	19.0157	18.936	19.1801	19.0542	18.9612	18.8976	20.2052	19.9467	19.8029	19.5821	19.4232	19.3084	19.2733	19.2845
2898	18.5972	18.559	18.4136	18.3758	18.5554	18.5097	18.4	18.4372	18.4759	18.3295	18.3006	18.2031	18.6006	18.6906	18.5589	18.5066	18.8143	18.7876	18.6553	18.5147	18.8601	18.853	18.7834	18.6839	19.0532	18.9368	18.8358	18.7597	20.1323	19.9206	19.7801	19.5422	19.6244	19.4861	19.4542	19.4647
2900	18.3638	18.308	18.1683	18.1298	18.3119	18.2644	18.1502	18.191	18.2526	18.096	18.0652	17.9728	18.3861	18.4499	18.3262	18.296	18.6159	18.6043	18.4595	18.3166	18.6703	18.733	18.6484	18.5468	18.9405	18.844	18.7568	18.6725	20.0821	19.9152	19.828	19.6156	19.8948	19.7528	19.7223	19.7277
2902	18.1549	18.1195	18.0243	17.9508	18.1556	18.0706	17.9719	17.9897	18.0828	17.9153	17.8798	17.7938	18.2093	18.2438	18.1476	18.1324	18.4176	18.4395	18.2563	18.1569	18.4981	18.6162	18.5226	18.4347	18.8812	18.7887	18.7067	18.6053	20.1486	19.9679	19.9142	19.7405	20.2622	20.0976	20.0552	20.0656
2904	17.988	17.973	17.904	17.8055	18.0438	17.9252	17.8423	17.8343	17.9533	17.7775	17.7397	17.6584	18.0853	18.0869	18.0072	18.0132	18.3092	18.3679	18.1628	18.0506	18.4705	18.5895	18.4779	18.405	18.9761	18.8639	18.7648	18.6441	20.4517	20.2058	20.1206	19.9373	20.7932	20.627	20.5755	20.5825
2906	17.989	17.9728	17.8827	17.7946	18.0562	17.9445	17.8605	17.8438	17.9656	17.789	17.7533	17.6754	18.1257	18.1054	18.0196	18.0401	18.4208	18.4796	18.2817	18.1031	18.669	18.757	18.6369	18.5843	19.2569	19.1345	19.0416	18.932	20.8668	20.5932	20.5213	20.3253	21.4273	21.2748	21.2213	21.2204
2908	18.2567	18.2306	18.1383	18.0409	18.3127	18.2341	18.1449	18.113	18.2133	18.044	17.9969	17.9317	18.415	18.4018	18.3344	18.3379	18.7538	18.7536	18.5623	18.3926	19.0116	19.0743	18.9823	18.9448	19.631	19.5179	19.4482	19.3722	21.3788	21.0848	21.0298	20.837	22.2333	22.0666	22.0219	22.0221
2910	18.6931	18.6581	18.611	18.4645	18.7334	18.6881	18.5933	18.542	18.6132	18.4564	18.3856	18.3359	18.8466	18.8665	18.839	18.803	19.2036	19.1498	18.9527	18.817	19.5061	19.5497	19.4568	19.4341	20.2802	20.1416	20.0707	19.9739	22.0928	21.8311	21.7935	21.5857	23.2273	23.0608	23.0324	23.0378
2912	19.3732	19.3217	19.2708	19.1057	19.4073	19.3879	19.2789	19.2246	19.2768	19.1194	19.0433	18.9961	19.5626	19.5778	19.5715	19.521	20.0232	19.9694	19.7447	19.5654	20.3714	20.4588	20.3203	20.288	21.2169	21.0991	21.0387	20.8938	23.001	22.7872	22.8007	22.6059	24.4327	24.2533	24.2327	24.2335
2914	20.5249	20.4632	20.4075	20.2315	20.5588	20.5409	20.3992	20.369	20.4244	20.2531	20.182	20.1062	20.7008	20.7316	20.7504	20.682	21.192	21.1108	20.8614	20.7401	21.4845	21.633	21.4777	21.4117	22.388	22.281	22.2206	22.0406	24.3105	24.0733	24.0463	23.8221	25.9547	25.7793	25.7532	25.7278
2916	21.9377	21.8697	21.8337	21.6304	21.9711	21.9512	21.7775	21.7657	21.8299	21.6468	21.5698	21.47	22.0955	22.1461	22.1753	22.0861	22.6272	22.5518	22.3073	22.165	23.0555	23.1477	22.9754	22.9	24.0143	23.9158	23.8397	23.6508	25.9188	25.7153	25.6906	25.409	27.6747	27.5295	27.4943	27.4448
2918	23.873	23.8058	23.6836	23.525	23.9153	23.8932	23.7005	23.6813	23.765	23.5799	23.4753	23.3787	24.0568	24.1199	24.0722	23.9935	24.5763	24.4835	24.2872	24.1377	25.0411	25.07	24.9609	24.8576	25.8727	25.8192	25.7468	25.5899	27.7269	27.5209	27.4881	27.2029	29.656	29.4549	29.4092	29.3661
2920	26.1501	26.1067	25.945	25.8084	26.2079	26.1506	25.9509	25.9148	26.0273	25.8527	25.7049	25.6094	26.291	26.4135	26.2721	26.1801	26.6642	26.5214	26.3886	26.3497	27.1015	27.0932	27.0357	26.8898	28.0002	27.8997	27.7855	27.6115	29.8604	29.6441	29.4589	29.1578	31.8434	31.6168	31.5596	31.5467
2922	28.4214	28.3814	28.1464	28.0738	28.4973	28.4022	28.2186	28.1643	28.2917	28.1189	27.9605	27.8608	28.5633	28.6827	28.4527	28.3315	28.8941	28.7876	28.7382	28.6322	29.4377	29.4408	29.3641	29.1833	30.3354	30.2249	30.0841	29.88	31.9503	31.7919	31.5237	31.2944	33.9762	33.7255	33.6581	33.6625
2924	30.9364	30.8918	30.5722	30.6182	31.0328	30.8693	30.7327	30.6485	30.7869	30.6207	30.4598	30.3432	31.0085	31.1432	30.8468	30.6444	31.1243	30.9657	31.0166	31.0637	31.5258	31.5915	31.5778	31.3123	32.3184	32.1688	32.028	31.8507	34.0953	33.7908	33.3522	33.1491	36.2034	35.8636	35.7956	35.7956
2926	32.7545	32.7316	32.4819	32.5081	32.8529	32.6121	32.4946	32.427	32.5711	32.4223	32.2463	32.099	32.6771	32.891	32.5719	32.296	32.6015	32.4042	32.5414	32.6819	33.1187	33.0999	33.1147	32.7607	34.2605	33.859	33.6516	33.4617	36.038	35.7193	35.1958	34.9229	38.1196	37.8157	37.7479	37.7373
2928	33.6123	33.5937	33.2949	33.2961	33.6996	33.4591	33.3184	33.3213	33.4524	33.2972	33.1444	32.988	33.6239	33.7849	33.3815	33.1721	33.7167	33.5482	33.7618	33.6441	34.477	34.3754	34.4146	33.9707	35.5888	35.13	34.9262	34.7914	37.0194	36.8362	36.4806	36.272	39.4381	39.1569	39.0556	39.0302
2930	34.2045	34.1945	33.8347	33.8281	34.283	34.0408	33.8791	33.9419	34.0625	33.9033	33.7681	33.6002	34.2588	34.4043	33.9423	33.7839	34.3763	34.1417	34.3908	34.2753	34.9398	34.8961	35.0538	34.5237	35.7829	35.4261	35.2178	35.1584	37.617	37.3358	36.8763	36.6572	40.5066	40.1953	40.0387	39.9926
2932	34.3088	34.3182	34.0215	33.9619	34.3829	34.1218	33.9519	34.0318	34.1533	34.0021	33.8562	33.6743	34.2788	34.4871	34.0479	33.8682	34.2477	33.9452	34.1581	34.2621	34.722	34.6951	34.841	34.3558	35.8037	35.4542	35.1799	35.0659	37.9286	37.6419	37.1174	36.8267	41.2265	40.9343	40.731	40.6736
2934	33.4608	33.4516	33.2722	33.1553	33.5261	33.3079	33.1245	33.1677	33.3101	33.1622	32.9745	32.826	33.4466	33.6222	33.2863	33.1031	33.5309	33.2736	33.3908	33.4485	34.2711	34.2257	34.2408	33.9083	35.7474	35.4014	35.084	34.8709	37.8161	37.6273	37.1885	36.8942	42.4696	41.451	41.2195	41.1713
2936	32.043	31.9744	31.7625	31.7017	32.0998	31.9758	31.7792	31.7667	31.9332	31.7758	31.5559	31.4717	32.186	32.2331	31.9958	31.8619	32.5637	32.369	32.3841	32.2515	33.5574	33.5341	33.4542	33.2542	35.0638	34.8709	34.6293	34.4033	37.3769	37.1527	36.8493	36.6157	43.7336	41.8727	41.6244	41.5892
2938	30.4228	30.3226	30.1277	30.0755	30.4759	30.3887	30.1992	30.1585	30.3397	30.1825	29.9563	29.8951	30.6132	30.6353	30.4958	30.3743	31.0618	30.8146	30.7421	30.6774	32.0948	32.0937	32.0592	31.8454	33.7389	33.5908	33.4042	33.2325	36.7975	36.4423	36.183	35.9058	43.6656	41.975	41.7313	41.6983
2940	28.2416	28.1334	28.0432	27.9033	28.2964	28.1919	28.044	28.0098	28.1907	28.0349	27.8571	27.7696	28.4705	28.4972	28.4384	28.3142	29.0669	28.8433	28.6975	28.5167	30.3796	30.3345	30.3124	30.072	32.366	32.2029	32.0282	31.8724	35.807	35.5306	35.3895	35.0829	42.3047	41.5657	41.3866	41.3202
2942	26.047	25.9274	25.8615	25.6913	26.1072	25.998	25.8902	25.8658	26.0412	25.8792	25.759	25.6524	26.3764	26.3623	26.3356	26.2417	27.1129	26.9394	26.7424	26.4466	28.6375	28.5943	28.6068	28.3772	30.7647	30.6562	30.5284	30.4105	34.5059	34.3033	34.2344	33.9789	41.0471	40.8712	40.7848	40.6725
2944	24.0012	23.8874	23.8572	23.6767	24.0683	23.9459	23.8618	23.84	24.0217	23.8566	23.761	23.6466	24.3706	24.3356	24.3322	24.2752	25.0617	24.9344	24.7113	24.4803	26.7612	26.7157	26.7881	26.5713	29.1064	29.0038	28.8996	28.7979	33.2646	33.053	32.9517	32.7088	40.315	40.1076	40.0767	39.9475
2946	22.0456	21.9397	21.9105	21.7491	22.1192	21.9988	21.925	21.9044	22.0924	21.9243	21.8489	21.7367	22.4653	22.3988	22.3916	22.3894	23.1432	23.0727	22.8495	22.6307	25.0573	25.0106	25.0848	24.8904	27.5692	27.4825	27.3909	27.2906	31.9933	31.7918	31.6902	31.4734	39.305	39.076	39.0342	38.9301
2948	20.4078	20.3125	20.2801	20.1418	20.4807	20.3899	20.3024	20.2806	20.4659	20.3105	20.2426	20.146	20.8314	20.7792	20.7677	20.7914	21.5002	21.4083	21.2088	21.0332	23.474	23.4753	23.5276	23.3398	26.0694	26.0179	25.9312	25.8314	30.6993	30.4963	30.3722	30.1931	38.1009	37.852	37.7951	37.7113
2950	18.9406	18.8564	18.8559	18.7224	19.0076	18.9634	18.8453	18.8198	18.9937	18.8664	18.7946	18.7267	19.3371	19.3302	19.3153	19.3406	20.0268	19.9269	19.7595	19.5685	22.0723	22.1022	22.1093	21.9379	24.7205	24.6854	24.5914	24.4933	29.3724	29.1973	29.0849	28.9267	36.5157	36.3369	36.3017	36.206
2952	17.8018	17.7298	17.7121	17.6046	17.8713	17.8564	17.7257	17.6972	17.8648	17.7453	17.6803	17.6327	18.2128	18.2136	18.181	18.2114	18.9311	18.8381	18.6912	18.4566	20.9273	20.949	20.9544	20.815	23.4722	23.4613	23.3708	23.3147	28.0369	27.8752	27.7952	27.6485	34.7216	34.5667	34.5578	34.4462
2954	17.0347	16.9993	16.9855	16.8625	17.1189	17.0744	16.9647	16.9359	17.1158	16.9768	16.9275	16.864	17.4195	17.4381	17.4084	17.4212	18.0314	17.925	17.794	17.6205	19.9241	19.8999	19.9178	19.8278	22.3866	22.3643	22.2689	22.2478	26.8265	26.6472	26.5735	26.4137	32.9349	32.8162	32.8179	32.7153
2956	16.429	16.4274	16.4095	16.2663	16.5294	16.4554	16.3711	16.3402	16.5342	16.3689	16.3417	16.2618	16.8207	16.8295	16.795	16.801	17.4135	17.3343	17.2149	16.9942	19.2452	19.2028	19.1809	19.1337	21.5619	21.5296	21.4631	21.4236	25.6806	25.5061	25.4861	25.3549	31.062	30.9992	30.9949	30.929
2958	16.2286	16.2268	16.1572	16.04	16.3364	16.2635	16.1853	16.1539	16.3488	16.1696	16.1527	16.0781	16.647	16.6402	16.585	16.5956	17.25	17.1582	17.0415	16.8266	18.7889	18.8314	18.7986	18.7375	20.8578	20.8152	20.8157	20.7324	24.6964	24.482	24.4755	24.3969	29.393	29.3167	29.2974	29.2641
2960	16.2925	16.2751	16.2224	16.0978	16.3882	16.3164	16.2332	16.2043	16.3813	16.2152	16.1866	16.1167	16.6435	16.6683	16.6198	16.5991	17.1799	17.0577	16.9399	16.8172	18.4766	18.5742	18.5253	18.4495	20.4236	20.3373	20.3597	20.2339	23.9488	23.7297	23.6972	23.6185	27.955	27.9163	27.8699	27.8573
2962	16.429	16.3906	16.3851	16.2314	16.4983	16.4298	16.3414	16.3144	16.4617	16.321	16.275	16.2061	16.6817	16.7371	16.7056	16.6462	17.1648	17.0368	16.9165	16.8468	18.4361	18.5231	18.4489	18.3786	20.2094	20.1532	20.1538	20.0429	23.3113	23.1097	23.1054	23.0214	26.7142	26.6779	26.5978	26.6054
2964	16.6643	16.6097	16.6077	16.4542	16.7085	16.6585	16.5606	16.5366	16.6553	16.5329	16.4766	16.4106	16.8729	16.9217	16.8848	16.8098	17.3716	17.2691	17.1763	17.0385	18.5584	18.6349	18.5669	18.4955	20.0544	20.0334	20.0081	19.9258	22.9382	22.6955	22.6444	22.5272	25.8307	25.7327	25.6773	25.6515
2966	17.1866	17.1485	17.0677	16.9877	17.2251	17.1943	17.0786	17.0636	17.1738	17.051	16.9895	16.9247	17.3779	17.4369	17.3579	17.2706	17.7916	17.6818	17.6346	17.5249	18.7363	18.8145	18.7658	18.6794	20.0433	20.0037	19.9591	19.8818	22.7546	22.5168	22.4031	22.2764	25.1724	25.0389	25.0648	24.9453
2968	17.7513	17.7291	17.6012	17.5851	17.7886	17.7496	17.6299	17.6183	17.7319	17.6096	17.5307	17.4696	17.8978	17.9804	17.8658	17.7608	18.1928	18.1035	18.0822	18.016	19.0516	19.0777	19.0137	18.9122	20.2701	20.1504	20.0977	19.9979	22.6217	22.3935	22.2512	22.1596	24.6237	24.4682	24.564	24.3664
2970	18.3311	18.2695	18.0996	18.1533	18.3654	18.2906	18.1987	18.1719	18.2943	18.1722	18.0677	18.0288	18.4639	18.5143	18.3489	18.2622	18.6773	18.6342	18.6281	18.5741	19.5069	19.4665	19.4248	19.2817	20.4852	20.3336	20.2881	20.1934	22.536	22.3115	22.1286	22.0582	24.1334	23.9561	24.0595	23.8685
2972	18.8755	18.7685	18.6108	18.7035	18.9082	18.7741	18.7151	18.6753	18.811	18.6917	18.5532	18.5312	18.9428	18.9915	18.796	18.7172	19.0291	18.9591	18.9817	19.0327	19.6887	19.6563	19.6705	19.4799	20.4959	20.3671	20.3137	20.2454	22.4473	22.1904	21.9995	21.9112	23.6747	23.4961	23.561	23.4413
2974	19.0076	18.9022	18.8002	18.8652	19.0391	18.883	18.826	18.8022	18.9371	18.8216	18.6649	18.6425	19.0209	19.092	18.9089	18.8142	19.0962	18.9957	19.0608	19.0954	19.6876	19.6567	19.6627	19.4696	20.45	20.327	20.2265	20.1611	22.3222	22.0081	21.8152	21.6549	23.1733	23.0165	23.0373	22.9805
2976	18.9226	18.8339	18.7232	18.7704	18.9438	18.8082	18.7506	18.7533	18.8693	18.7581	18.6016	18.575	18.9535	19.0056	18.8417	18.739	19.1097	18.9803	19.0882	19.0151	19.6425	19.6075	19.5903	19.4098	20.3526	20.2316	20.0843	20.005	22.0275	21.7325	21.5602	21.3275	22.596	22.4644	22.4587	22.4048
2978	18.7647	18.6943	18.5577	18.5853	18.7696	18.6681	18.6126	18.6386	18.7269	18.6262	18.4779	18.4424	18.8303	18.848	18.7069	18.6012	19.0588	18.8821	19.0118	18.8696	19.4515	19.4281	19.4208	19.2556	19.9639	19.8777	19.7597	19.6767	21.4857	21.2108	21.0644	20.8705	21.9504	21.8426	21.8197	21.741
2980	18.3847	18.3338	18.239	18.211	18.3823	18.2934	18.237	18.2625	18.3365	18.2492	18.1117	18.0561	18.4167	18.4469	18.3464	18.2296	18.574	18.3602	18.4624	18.4153	18.8686	18.8085	18.8338	18.6848	19.3214	19.204	19.1263	19.023	20.8593	20.5696	20.3936	20.2594	21.2239	21.1443	21.1075	21.0229
2982	17.5441	17.4926	17.4419	17.3775	17.561	17.4664	17.4092	17.4067	17.4866	17.3869	17.2894	17.2134	17.5827	17.5996	17.5178	17.4294	17.7622	17.5925	17.6417	17.5688	18.1387	18.0208	18.0275	17.9159	18.5963	18.4559	18.3972	18.277	20.0588	19.8125	19.6627	19.5523	20.3858	20.3222	20.2796	20.2215
2984	16.5995	16.5425	16.4789	16.4188	16.6349	16.5431	16.4858	16.467	16.551	16.4336	16.3789	16.2947	16.6803	16.6711	16.5909	16.5405	16.9149	16.7809	16.7655	16.6611	17.2413	17.1619	17.1567	17.0761	17.6508	17.5423	17.488	17.3984	19.1443	18.9108	18.7924	18.6672	19.5044	19.436	19.3928	19.3654
2986	15.5345	15.4946	15.4546	15.3716	15.5809	15.4874	15.4292	15.4228	15.5117	15.3878	15.3531	15.2809	15.6314	15.6428	15.5724	15.5236	15.8871	15.7985	15.6909	15.5998	16.1656	16.1445	16.111	16.0605	16.6329	16.5339	16.4669	16.4039	18.2134	17.9747	17.8821	17.7191	18.5824	18.52	18.4815	18.4671
2988	14.3772	14.3508	14.3081	14.2263	14.4271	14.3414	14.2831	14.2968	14.3881	14.2607	14.2386	14.1877	14.5101	14.5314	14.4645	14.419	14.8156	14.7676	14.6032	14.4814	15.1085	15.1147	15.0588	15.0302	15.6011	15.5092	15.4534	15.399	17.2188	16.965	16.939	16.7825	17.6343	17.5588	17.528	17.5169
2990	13.303	13.2734	13.2288	13.1566	13.3382	13.2685	13.2118	13.2353	13.3208	13.197	13.1799	13.1311	13.444	13.4561	13.4065	13.3747	13.7464	13.6684	13.52	13.4229	14.0163	14.0335	13.9885	13.9555	14.5382	14.4359	14.397	14.3396	16.2512	15.9692	15.9753	15.8248	16.7331	16.6493	16.62	16.6058
2992	12.2575	12.2138	12.1858	12.1171	12.2613	12.2116	12.1599	12.1867	12.2611	12.1471	12.1278	12.0663	12.3837	12.3701	12.3502	12.3403	12.6743	12.5653	12.4614	12.3749	12.9763	12.9827	12.9435	12.9096	13.5495	13.4452	13.4073	13.3439	15.312	15.063	15.0801	14.9335	15.8577	15.796	15.7611	15.7328
2994	11.3005	11.2443	11.2205	11.1646	11.2837	11.2481	11.2038	11.2304	11.2935	11.189	11.1686	11.1063	11.4202	11.385	11.3812	11.393	11.7092	11.606	11.5208	11.4247	12.0502	12.0462	12.0153	11.9999	12.605	12.5401	12.4983	12.4507	14.421	14.2142	14.2284	14.0995	15.0353	14.9869	14.9483	14.9075
2996	10.4447	10.3862	10.3734	10.3272	10.4291	10.3854	10.3518	10.3782	10.4307	10.3385	10.3106	10.2721	10.5468	10.5235	10.5208	10.5417	10.8169	10.7379	10.6533	10.5512	11.1974	11.1771	11.1588	11.1709	11.7456	11.7129	11.6596	11.6281	13.6513	13.4604	13.4467	13.33	14.2858	14.233	14.2039	14.1686
2998	9.67268	9.6148	9.60531	9.57216	9.66652	9.61171	9.58912	9.61287	9.6555	9.57542	9.54068	9.53029	9.76495	9.75595	9.74518	9.77251	10.032	9.97968	9.89639	9.7736	10.4527	10.4229	10.4096	10.4356	11.0121	10.9921	10.9321	10.9071	12.9667	12.7881	12.748	12.6506	13.5878	13.5185	13.513	13.4906
3000	9.0303	8.98154	8.9673	8.93925	9.03571	8.98441	8.96702	8.9802	9.01918	8.94647	8.91745	8.90914	9.11964	9.12109	9.10894	9.12984	9.37616	9.32539	9.25653	9.15037	9.78669	9.76431	9.76191	9.77397	10.3617	10.3439	10.2819	10.26	12.3529	12.1748	12.1102	12.0353	12.9384	12.8619	12.8702	12.8562
3002	8.4777	8.44703	8.43698	8.39702	8.4984	8.4589	8.44465	8.43911	8.47948	8.41053	8.39684	8.37121	8.56526	8.57801	8.57321	8.57448	8.80131	8.75233	8.69975	8.62855	9.20853	9.19157	9.19322	9.18692	9.79479	9.77568	9.71884	9.69112	11.8007	11.6126	11.5518	11.4859	12.3233	12.2647	12.2654	12.2521
3004	8.0138	7.99635	7.98779	7.93896	8.04449	8.01364	8.00094	7.98418	8.02584	7.95878	7.95822	7.91888	8.10121	8.12007	8.11714	8.10734	8.32384	8.28082	8.2339	8.18178	8.73727	8.71913	8.71674	8.70476	9.28924	9.27259	9.24079	9.20041	11.2986	11.0953	11.0547	10.9935	11.7501	11.7121	11.6968	11.6853
3006	7.63951	7.6233	7.61332	7.56489	7.66609	7.63342	7.62079	7.60862	7.6509	7.58476	7.5886	7.54776	7.7157	7.74026	7.72857	7.72462	7.92361	7.88116	7.83316	7.78509	8.33601	8.31365	8.306	8.29506	8.84532	8.82626	8.82164	8.76619	10.8413	10.6347	10.6087	10.5488	11.2253	11.1978	11.1695	11.1712
3008	7.32267	7.3036	7.28769	7.24406	7.34056	7.30326	7.28984	7.2874	7.32955	7.26403	7.26958	7.23059	7.38743	7.41402	7.39038	7.39816	7.58402	7.54331	7.49454	7.43923	7.98707	7.96595	7.95456	7.94749	8.47155	8.45449	8.45802	8.39532	10.4078	10.2176	10.2041	10.1505	10.7363	10.7095	10.6673	10.6962
3010	7.05383	7.0373	7.01882	6.98008	7.07355	7.03334	7.01294	7.02267	7.05827	6.99712	6.99955	6.9657	7.11749	7.13874	7.10797	7.12503	7.29206	7.25702	7.20965	7.15789	7.66641	7.65959	7.65318	7.64835	8.14546	8.13769	8.1323	8.07048	10.0266	9.84309	9.82844	9.786	10.2973	10.2686	10.2193	10.2628
3012	6.80909	6.80575	6.79597	6.75447	6.84192	6.80351	6.76333	6.79349	6.81506	6.76394	6.75623	6.72729	6.88286	6.8893	6.85858	6.88554	7.02514	7.00607	6.95941	6.9154	7.38763	7.38951	7.3889	7.38633	7.86411	7.8637	7.84684	7.78981	9.71708	9.52844	9.50888	9.46608	9.89837	9.88226	9.84075	9.86705
3014	6.60589	6.60973	6.60581	6.56453	6.64541	6.61155	6.55805	6.60186	6.60976	6.56723	6.55435	6.52965	6.68927	6.68218	6.65167	6.68172	6.81439	6.80657	6.75844	6.71506	7.17311	7.16703	7.16758	7.1669	7.6097	7.61619	7.60147	7.55501	9.44897	9.25485	9.23627	9.18456	9.54028	9.53323	9.50548	9.50291
3016	6.46445	6.45411	6.45064	6.41871	6.48827	6.45574	6.41587	6.45019	6.4508	6.41024	6.40624	6.38553	6.53608	6.533	6.50244	6.51372	6.65663	6.63811	6.58908	6.5527	6.99115	6.97186	6.97213	6.9696	7.38409	7.39024	7.38251	7.34917	9.22131	9.02012	8.99607	8.93133	9.23491	9.22677	9.20886	9.18633
3018	6.35032	6.31645	6.30808	6.29558	6.34666	6.31597	6.299	6.3163	6.31218	6.27121	6.27982	6.26446	6.40391	6.40821	6.3801	6.36268	6.5252	6.49685	6.45239	6.41104	6.84398	6.81104	6.80738	6.80879	7.20716	7.21169	7.20022	7.17399	9.01982	8.81575	8.78726	8.7247	8.9594	8.94515	8.93573	8.89834
3020	6.25963	6.21543	6.20011	6.20005	6.2398	6.21369	6.20642	6.21407	6.2113	6.17266	6.1844	6.17249	6.30313	6.3116	6.28281	6.2531	6.41549	6.38515	6.35288	6.30664	6.7194	6.68166	6.67574	6.69117	7.05516	7.0619	7.03893	7.01645	8.84159	8.62816	8.59749	8.55049	8.72156	8.69611	8.69043	8.64748
3022	6.17189	6.13763	6.12745	6.11999	6.1536	6.13026	6.11565	6.12704	6.1303	6.10158	6.09998	6.08692	6.21497	6.22533	6.1913	6.16626	6.31066	6.27978	6.25945	6.21254	6.60669	6.56741	6.55745	6.58973	6.93396	6.93333	6.89955	6.87973	8.68674	8.47489	8.43646	8.40021	8.51524	8.48608	8.47222	8.44507
3024	6.09153	6.07035	6.06162	6.04881	6.08034	6.05939	6.03454	6.05213	6.06254	6.04265	6.02515	6.01132	6.14041	6.14854	6.10994	6.09404	6.22857	6.20342	6.18682	6.13612	6.52425	6.48636	6.47016	6.51403	6.83664	6.82046	6.79166	6.77647	8.54156	8.34127	8.30111	8.26593	8.3288	8.29545	8.26465	8.26665
3026	6.04276	6.02772	6.01527	6.00296	6.03696	6.01558	5.9862	6.00479	6.02325	6.00073	5.9763	5.9643	6.08384	6.09225	6.06232	6.0482	6.16542	6.14707	6.12181	6.08566	6.44584	6.41804	6.3996	6.43463	6.74553	6.70722	6.69556	6.68557	8.41586	8.22505	8.18209	8.14036	8.17089	8.13068	8.09408	8.11056
3028	5.99968	5.9818	5.96432	5.95719	5.99798	5.96803	5.94066	5.95856	5.98542	5.95107	5.92686	5.91587	6.02513	6.03349	6.02033	6.00013	6.10763	6.09985	6.06168	6.0343	6.37897	6.35908	6.33935	6.36055	6.67154	6.62446	6.61833	6.61343	8.28872	8.11847	8.0805	8.04253	8.01161	7.97626	7.94184	7.9496
3030	5.96627	5.94586	5.92125	5.92115	5.96832	5.93234	5.91023	5.92582	5.95615	5.91256	5.89127	5.88141	5.98602	5.99079	5.9878	5.96629	6.07254	6.0648	6.02486	6.001	6.32149	6.30426	6.29574	6.30955	6.58653	6.55283	6.54736	6.5445	8.17264	8.00561	7.97104	7.95427	7.87556	7.84009	7.8093	7.80447
3032	5.9345	5.91974	5.89748	5.8932	5.94009	5.90134	5.88756	5.90338	5.92121	5.88462	5.86469	5.85349	5.95264	5.95751	5.95261	5.93836	6.03712	6.0126	5.98672	5.9647	6.2599	6.2367	6.24297	6.25011	6.51583	6.49092	6.48528	6.47459	8.10817	7.92766	7.88301	7.87661	7.76544	7.7371	7.71576	7.70919
3034	5.89969	5.8895	5.87038	5.85803	5.90631	5.86554	5.86076	5.88064	5.87793	5.85412	5.8371	5.82276	5.91997	5.92412	5.90935	5.907	6.01268	5.97509	5.9629	5.92856	6.23283	6.19944	6.20703	6.21665	6.47813	6.45681	6.45525	6.43554	8.05818	7.86448	7.81902	7.81293	7.65632	7.63525	7.62787	7.62171
3036	5.89021	5.87841	5.85673	5.84557	5.8935	5.85405	5.85077	5.87118	5.86743	5.84081	5.82929	5.81288	5.91138	5.9171	5.89377	5.89791	6.01371	5.9727	5.95733	5.92197	6.22094	6.18216	6.19092	6.21376	6.44218	6.42087	6.43188	6.39995	8.02276	7.81083	7.74875	7.73508	7.5901	7.55564	7.55872	7.55509
3038	5.90478	5.88197	5.85642	5.85734	5.89381	5.86204	5.85027	5.86811	5.88473	5.83908	5.83863	5.81678	5.92339	5.93127	5.89554	5.90046	6.02375	5.98163	5.95432	5.93395	6.21108	6.1696	6.1784	6.2161	6.42675	6.39853	6.41477	6.37506	7.99147	7.78205	7.70993	7.68842	7.53887	7.48643	7.49276	7.49059
3040	5.9199	5.88868	5.8624	5.87352	5.89913	5.87209	5.85328	5.86989	5.90318	5.84127	5.84948	5.82294	5.93617	5.94581	5.90208	5.90679	6.0326	5.9896	5.95641	5.94596	6.21035	6.17373	6.17524	6.21357	6.42662	6.38437	6.39506	6.37382	7.95272	7.74685	7.68886	7.6702	7.49173	7.41601	7.42076	7.41743
3042	5.92742	5.89712	5.87818	5.88744	5.91458	5.88016	5.86553	5.88595	5.91184	5.84864	5.85918	5.83134	5.94266	5.95372	5.91759	5.92389	6.04996	6.00909	5.96667	5.95475	6.21865	6.18968	6.18039	6.20206	6.42863	6.37243	6.36857	6.37929	7.92844	7.71761	7.67197	7.65421	7.44014	7.3631	7.36645	7.36354
3044	5.94079	5.91197	5.91095	5.91192	5.94445	5.8947	5.8885	5.91758	5.92262	5.86589	5.876	5.84598	5.95157	5.96582	5.94712	5.95327	6.07008	6.02961	5.9778	5.96606	6.22778	6.20295	6.18808	6.19688	6.42689	6.37124	6.36179	6.37688	7.89729	7.68864	7.65041	7.63905	7.36174	7.29058	7.29509	7.29818
3046	5.95107	5.92398	5.93569	5.93003	5.96791	5.90813	5.90451	5.93868	5.93456	5.88321	5.88667	5.85858	5.96444	5.9787	5.96748	5.97213	6.08289	6.04562	5.99114	5.9777	6.24231	6.21008	6.20444	6.20937	6.41931	6.37147	6.37582	6.35549	7.87149	7.65821	7.61573	7.60906	7.31182	7.23853	7.24073	7.24969
3048	5.97103	5.95111	5.9569	5.9507	6.00069	5.94078	5.92795	5.9651	5.96209	5.92382	5.90815	5.89331	5.99523	6.01135	5.99372	5.99429	6.09929	6.06728	6.01533	6.00916	6.26164	6.21696	6.23182	6.23031	6.41796	6.37559	6.39154	6.33658	7.86044	7.64653	7.59744	7.58899	7.28069	7.23067	7.22003	7.22967
3050	5.99473	5.98529	5.98495	5.97647	6.03524	5.97751	5.95516	5.99271	5.99506	5.96764	5.93501	5.93265	6.0267	6.04519	6.02377	6.01877	6.1147	6.08276	6.035	6.04123	6.2792	6.2262	6.24952	6.24879	6.43384	6.39927	6.40339	6.34828	7.84739	7.64506	7.59457	7.58418	7.25069	7.2296	7.20252	7.21042
3052	6.02127	6.01555	6.01187	6.00437	6.0587	6.00653	5.98282	6.01837	6.02485	5.99176	5.9619	5.96085	6.05991	6.06714	6.05245	6.046	6.15238	6.11337	6.07535	6.0808	6.3103	6.2512	6.27428	6.27933	6.45696	6.43719	6.4246	6.38605	7.84292	7.64788	7.59448	7.5801	7.22966	7.22296	7.19175	7.19885
3054	6.07643	6.06405	6.05855	6.05506	6.08801	6.05261	6.02606	6.06342	6.06623	6.02278	6.00427	6.00203	6.11223	6.10139	6.10127	6.09015	6.20276	6.15047	6.12532	6.13857	6.33413	6.27951	6.30146	6.30937	6.47904	6.46345	6.44207	6.41282	7.84902	7.66064	7.59855	7.58359	7.20507	7.19847	7.17094	7.17893
3056	6.11946	6.10223	6.10229	6.09818	6.11839	6.08979	6.06401	6.1017	6.10559	6.0518	6.03962	6.0358	6.15236	6.12974	6.13895	6.12809	6.23862	6.187	6.16372	6.16802	6.35739	6.31895	6.33184	6.3349	6.52521	6.491	6.4659	6.42875	7.85815	7.68092	7.6108	7.6034	7.19071	7.17686	7.15036	7.15908
3058	6.16998	6.14875	6.1453	6.14099	6.17296	6.13467	6.10782	6.15466	6.16124	6.10084	6.09517	6.08579	6.20039	6.17339	6.17966	6.17259	6.28706	6.24828	6.21425	6.1956	6.39301	6.37516	6.3824	6.37162	6.56205	6.51533	6.49392	6.44785	7.86984	7.68985	7.62742	7.62193	7.1882	7.16944	7.13737	7.14805
3060	6.22957	6.20621	6.20112	6.19322	6.23877	6.18692	6.15812	6.21228	6.22325	6.15858	6.16081	6.1431	6.24986	6.22705	6.2287	6.21996	6.32569	6.29185	6.25129	6.22185	6.42618	6.41218	6.41986	6.39974	6.58049	6.53223	6.52305	6.48063	7.89172	7.69358	7.6563	7.63162	7.18842	7.15987	7.1214	7.13915
3062	6.27142	6.25019	6.24396	6.23553	6.28748	6.2321	6.20524	6.24627	6.26977	6.19787	6.20721	6.18573	6.29097	6.27315	6.272	6.25726	6.35897	6.32536	6.29532	6.25266	6.47585	6.45264	6.45259	6.44063	6.60245	6.55298	6.56726	6.54787	7.90878	7.69805	7.68891	7.64398	7.19146	7.15249	7.11986	7.13717
3064	6.32625	6.30796	6.29829	6.29256	6.34559	6.29338	6.2664	6.28911	6.3272	6.24727	6.26204	6.24303	6.34647	6.33609	6.33984	6.3061	6.40253	6.36467	6.34967	6.31326	6.52347	6.49513	6.48816	6.48741	6.6276	6.576	6.60333	6.60163	7.94116	7.71572	7.70568	7.65805	7.20415	7.14775	7.14719	7.1428
3066	6.37941	6.36161	6.35535	6.34966	6.397	6.34415	6.32313	6.33343	6.37887	6.29497	6.31176	6.28986	6.39603	6.39133	6.40059	6.35474	6.45232	6.41169	6.40371	6.36658	6.57284	6.54246	6.5314	6.53738	6.68482	6.63372	6.64491	6.64156	7.98076	7.75653	7.72585	7.70006	7.21495	7.14786	7.17833	7.14881
3068	6.44508	6.42174	6.41793	6.41487	6.45101	6.39552	6.38788	6.4058	6.43915	6.36462	6.37566	6.34678	6.46458	6.45539	6.46415	6.42213	6.54443	6.49026	6.4882	6.42881	6.63761	6.61108	6.60266	6.61642	6.74309	6.70318	6.69265	6.6829	8.00324	7.78863	7.74357	7.74173	7.22223	7.15912	7.18983	7.15957
3070	6.52496	6.49721	6.50152	6.49395	6.51521	6.45864	6.46074	6.49554	6.51003	6.45273	6.45169	6.4165	6.5418	6.53082	6.53855	6.50347	6.63296	6.56483	6.55244	6.49901	6.69536	6.67169	6.66384	6.67487	6.79274	6.75082	6.73442	6.71249	8.02869	7.82281	7.76763	7.75832	7.23081	7.18415	7.19781	7.18849
3072	6.58809	6.56401	6.56836	6.55386	6.57262	6.52044	6.52154	6.5569	6.56723	6.517	6.51114	6.47612	6.60178	6.59296	6.59355	6.56947	6.70094	6.63432	6.60502	6.57275	6.76722	6.74178	6.72009	6.73003	6.85471	6.80049	6.79717	6.75616	8.05058	7.85527	7.80366	7.7766	7.2351	7.20367	7.19991	7.20551
3074	6.66308	6.6488	6.63428	6.62139	6.64866	6.60913	6.60133	6.61778	6.63787	6.58409	6.58316	6.56057	6.66752	6.67473	6.6574	6.64493	6.77271	6.70584	6.6648	6.67313	6.83168	6.81047	6.77976	6.78738	6.89864	6.84325	6.84996	6.79561	8.07674	7.88249	7.82663	7.79647	7.24509	7.22519	7.19696	7.20592
3076	6.73206	6.72445	6.69773	6.68827	6.72235	6.68631	6.67061	6.6753	6.70248	6.64647	6.64666	6.63423	6.72692	6.74746	6.71653	6.71208	6.82987	6.7673	6.7167	6.7469	6.88306	6.86052	6.83455	6.83375	6.9412	6.89461	6.89628	6.84032	8.10849	7.92073	7.85085	7.83743	7.25845	7.24663	7.197	7.2065
3078	6.79771	6.78166	6.75642	6.75768	6.79092	6.74179	6.72473	6.73905	6.76412	6.71576	6.70744	6.69718	6.79399	6.80548	6.77691	6.77331	6.89028	6.83803	6.78682	6.79244	6.94586	6.91527	6.90124	6.89512	6.9869	6.95117	6.95003	6.90363	8.14131	7.95246	7.87475	7.88297	7.28636	7.25645	7.21538	7.2241
3080	6.87794	6.84324	6.83344	6.84474	6.86816	6.80005	6.78562	6.81697	6.83707	6.79922	6.78095	6.76759	6.87096	6.86839	6.85209	6.84136	6.95335	6.90697	6.8538	6.83596	6.99861	6.96699	6.96848	6.95731	7.04962	7.00611	7.00475	6.96103	8.19926	7.99815	7.91976	7.91655	7.3293	7.2706	7.26975	7.27303
3082	6.95333	6.90378	6.90607	6.91838	6.94128	6.86294	6.85182	6.89397	6.90732	6.86919	6.85028	6.83016	6.94723	6.93208	6.92069	6.90888	7.02884	6.99302	6.93363	6.89612	7.08049	7.05316	7.0511	7.05147	7.14145	7.08991	7.09125	7.03733	8.2558	8.04664	7.99368	7.96615	7.35098	7.28526	7.30713	7.30906
3084	7.05018	6.99881	6.99589	6.99546	7.0382	6.95479	6.94837	6.99045	6.99672	6.95514	6.93514	6.91483	7.04882	7.02681	7.01606	7.00062	7.12664	7.09549	7.03665	7.00545	7.16812	7.15237	7.14665	7.15991	7.21176	7.16308	7.16548	7.11056	8.32695	8.08605	8.03818	8.00638	7.37134	7.31074	7.3228	7.33392
3086	7.14227	7.09774	7.09316	7.0748	7.13025	7.05123	7.04424	7.08573	7.08819	7.03928	7.01909	7.002	7.14293	7.12288	7.11132	7.09258	7.21225	7.17273	7.12385	7.10913	7.24393	7.22237	7.22775	7.23253	7.28299	7.23277	7.22445	7.18172	8.41122	8.14753	8.08178	8.0566	7.39297	7.34471	7.33717	7.36096
3088	7.21476	7.18276	7.17816	7.15899	7.20659	7.14931	7.13268	7.17456	7.18173	7.12012	7.10736	7.09671	7.22916	7.20897	7.19533	7.18357	7.30682	7.25428	7.21008	7.19954	7.34155	7.29891	7.32041	7.30215	7.35333	7.30823	7.29136	7.26778	8.44736	8.1923	8.12407	8.113	7.4193	7.37313	7.3522	7.37666
3090	7.29344	7.278	7.27427	7.2631	7.29371	7.26028	7.23182	7.27027	7.28771	7.21842	7.2118	7.21086	7.32032	7.3027	7.29058	7.28485	7.40365	7.32954	7.2924	7.29106	7.41607	7.3711	7.40262	7.36409	7.4179	7.36718	7.35111	7.33124	8.46941	8.2446	8.16523	8.15551	7.46028	7.41377	7.39209	7.40277
3092	7.37412	7.36478	7.36085	7.35539	7.37514	7.35198	7.3156	7.35311	7.37714	7.30761	7.29713	7.30461	7.40107	7.38719	7.37111	7.36602	7.4944	7.40871	7.38063	7.3744	7.49663	7.45889	7.47511	7.43537	7.50488	7.43139	7.43044	7.39369	8.49239	8.30586	8.22268	8.21376	7.485	7.44754	7.4301	7.42526
3094	7.48541	7.4607	7.4507	7.45052	7.47153	7.44587	7.41186	7.44215	7.47309	7.41215	7.391	7.39461	7.49662	7.4864	7.45948	7.45793	7.59444	7.51257	7.48236	7.47356	7.58413	7.55824	7.55269	7.5205	7.57131	7.49511	7.51038	7.45946	8.55226	8.35305	8.2646	8.26583	7.51769	7.4849	7.47495	7.45757
3096	7.6008	7.55661	7.54629	7.55025	7.57431	7.5357	7.50833	7.53363	7.56548	7.5131	7.48067	7.48141	7.58944	7.58444	7.55005	7.54915	7.68607	7.60369	7.57243	7.56391	7.66655	7.64559	7.62612	7.60268	7.63772	7.58563	7.59067	7.53887	8.64921	8.42736	8.31806	8.32664	7.55428	7.53335	7.53299	7.50871
3098	7.69933	7.64759	7.63845	7.65476	7.67967	7.62425	7.60238	7.63111	7.65487	7.59984	7.56818	7.57345	7.6862	7.67611	7.64382	7.63642	7.78699	7.71146	7.66704	7.65229	7.77788	7.74607	7.73962	7.7115	7.71086	7.69935	7.68418	7.64354	8.71571	8.49294	8.38002	8.39545	7.59793	7.57493	7.57546	7.55645
3100	7.80289	7.75427	7.74936	7.77894	7.79981	7.72787	7.71127	7.74546	7.76201	7.69757	7.67821	7.68345	7.79734	7.78263	7.76037	7.74119	7.8906	7.82074	7.76356	7.75265	7.88348	7.83961	7.84872	7.81848	7.7968	7.78897	7.7666	7.73626	8.78024	8.56156	8.45668	8.45135	7.67461	7.63428	7.63545	7.63105
3102	7.9009	7.85284	7.85639	7.88634	7.90847	7.82489	7.80833	7.85133	7.86548	7.79223	7.77394	7.7869	7.8968	7.88731	7.86849	7.84448	7.99367	7.92553	7.86776	7.85214	8.00836	7.93037	7.93044	7.92922	7.93761	7.87813	7.8667	7.83773	8.83841	8.6379	8.57174	8.52261	7.72336	7.68768	7.68394	7.69483
3104	8.01494	7.96814	7.9676	7.98884	8.02606	7.94273	7.921	7.9683	7.99242	7.91131	7.87573	7.90387	8.01456	8.01557	7.98285	7.96962	8.118	8.04364	7.98864	7.97165	8.13468	8.0276	8.01617	8.0526	8.04649	7.96209	7.9624	7.93575	8.8968	8.68607	8.6492	8.59064	7.7595	7.73659	7.71658	7.74906
3106	8.13494	8.09026	8.08762	8.09195	8.14221	8.05978	8.03657	8.08383	8.117	8.02974	7.98311	8.01766	8.12963	8.1433	8.09979	8.09324	8.22601	8.14843	8.09597	8.0849	8.2261	8.12301	8.10149	8.15084	8.12956	8.05324	8.04775	8.01838	8.97501	8.73677	8.70353	8.67084	7.8005	7.79255	7.75429	7.81158
3108	8.25193	8.20197	8.20137	8.1921	8.2465	8.15993	8.14358	8.18414	8.21656	8.12688	8.10066	8.12164	8.24099	8.24494	8.21244	8.20059	8.32975	8.25338	8.20978	8.18741	8.32349	8.24595	8.21462	8.24924	8.21564	8.157	8.1466	8.11117	9.04684	8.79102	8.75763	8.76173	7.85654	7.83825	7.79417	7.84904
3110	8.38423	8.32223	8.32322	8.31072	8.36154	8.27014	8.26469	8.28918	8.3204	8.23224	8.24276	8.23887	8.36722	8.34503	8.33612	8.31715	8.43764	8.35939	8.32874	8.29483	8.41036	8.36441	8.33304	8.34562	8.30887	8.25169	8.24088	8.20325	9.15418	8.87769	8.82899	8.83742	7.94778	7.90218	7.88107	7.89357
3112	8.50497	8.43517	8.44343	8.42376	8.4731	8.38138	8.38445	8.39796	8.42145	8.33539	8.36766	8.34852	8.48763	8.45149	8.45637	8.42897	8.5572	8.48214	8.45226	8.40599	8.52637	8.49292	8.44967	8.45682	8.44202	8.3666	8.36126	8.32597	9.25656	8.98445	8.94114	8.93002	8.01303	7.95845	7.95715	7.93234
3114	8.63123	8.56919	8.57722	8.55488	8.60226	8.52617	8.52475	8.54268	8.55925	8.47795	8.49709	8.48307	8.62874	8.60161	8.59114	8.56425	8.71464	8.63209	8.59198	8.54573	8.65841	8.63035	8.57835	8.5871	8.55237	8.48091	8.47625	8.45021	9.32486	9.0591	9.02325	9.00564	8.05997	8.01016	7.99979	7.97768
3116	8.75813	8.70621	8.71663	8.69491	8.73493	8.67081	8.66055	8.68759	8.70153	8.62486	8.62178	8.61475	8.75997	8.74929	8.7236	8.69847	8.85415	8.75621	8.71026	8.68007	8.76982	8.72681	8.68735	8.69007	8.64148	8.58719	8.56325	8.53832	9.39661	9.1305	9.09093	9.07655	8.10531	8.07317	8.04866	8.04589
3118	8.87282	8.81998	8.82723	8.81594	8.85263	8.78513	8.77075	8.80064	8.81903	8.73912	8.72963	8.72301	8.86898	8.85917	8.83635	8.81221	8.97713	8.86946	8.8234	8.79561	8.89293	8.82325	8.79267	8.79184	8.73224	8.69345	8.65288	8.61961	9.46245	9.20125	9.16035	9.15744	8.15491	8.11421	8.09621	8.10659
3120	8.99324	8.94321	8.93932	8.94696	8.97694	8.90341	8.88643	8.91759	8.94835	8.85923	8.84868	8.84165	8.98478	8.97454	8.95605	8.93299	9.09776	8.98095	8.93729	8.91173	9.00505	8.91868	8.89977	8.8972	8.82834	8.78392	8.74925	8.70276	9.5641	9.29523	9.23199	9.21301	8.22924	8.17602	8.182	8.19322
3122	9.11116	9.06077	9.04881	9.07097	9.09121	9.01503	8.99693	9.03013	9.06392	8.97275	8.96629	8.94702	9.09274	9.08319	9.06936	9.04628	9.21473	9.09819	9.06056	9.02435	9.12172	9.03254	9.02727	9.01881	8.95527	8.89348	8.88722	8.82016	9.66187	9.40371	9.33296	9.28321	8.2932	8.23847	8.26184	8.27511
3124	9.24623	9.19682	9.1799	9.20523	9.22185	9.15251	9.13758	9.16732	9.19596	9.10287	9.10629	9.07615	9.22784	9.22086	9.20429	9.18919	9.34818	9.23654	9.21171	9.16416	9.24387	9.16805	9.17957	9.1638	9.07322	8.99803	9.02146	8.94559	9.73187	9.48858	9.4214	9.35851	8.37469	8.31469	8.31839	8.34005
3126	9.38782	9.3404	9.3319	9.34415	9.36032	9.29756	9.28229	9.31205	9.33638	9.23815	9.25133	9.21373	9.36673	9.36805	9.34713	9.33365	9.4769	9.36931	9.34836	9.3039	9.35029	9.29563	9.30577	9.29971	9.18955	9.10088	9.11651	9.0537	9.81679	9.58102	9.51967	9.46465	8.46445	8.4191	8.38295	8.40959
3128	9.52159	9.47265	9.46708	9.46678	9.4882	9.43265	9.40268	9.44975	9.47301	9.36691	9.3785	9.34534	9.50095	9.50155	9.47674	9.45264	9.61612	9.51594	9.48884	9.43888	9.47521	9.44661	9.43459	9.45222	9.31091	9.22449	9.21015	9.17599	9.89546	9.66779	9.62084	9.59862	8.52837	8.48351	8.43927	8.46756
3130	9.66521	9.62477	9.61274	9.60196	9.63167	9.58453	9.53418	9.60591	9.62971	9.51529	9.50786	9.50238	9.65231	9.64625	9.62254	9.58529	9.76084	9.66136	9.62632	9.58854	9.59265	9.58174	9.55757	9.58841	9.42324	9.32812	9.30629	9.28425	10.0164	9.75119	9.705	9.69218	8.60036	8.54715	8.52296	8.55019
3132	9.79564	9.75739	9.74947	9.72579	9.76918	9.71448	9.65831	9.73755	9.75993	9.64793	9.63187	9.63336	9.78717	9.77472	9.754	9.70704	9.88684	9.7857	9.75226	9.72098	9.72453	9.68912	9.67404	9.68858	9.56112	9.458	9.43784	9.41566	10.1414	9.84124	9.81054	9.7792	8.65298	8.6104	8.60174	8.62812
3134	9.92752	9.88518	9.87905	9.85609	9.9101	9.85083	9.80357	9.85452	9.8796	9.78182	9.77007	9.75666	9.92773	9.90338	9.88636	9.84862	10.0146	9.91442	9.8941	9.85493	9.87237	9.7991	9.80328	9.78568	9.68478	9.59184	9.56678	9.55136	10.2397	9.93215	9.8946	9.86054	8.71894	8.69063	8.66373	8.69568
3136	10.0629	10.0165	10.016	9.99602	10.0532	9.98656	9.95483	9.97057	9.99833	9.91604	9.91052	9.88347	10.0647	10.0352	10.019	9.99204	10.14	10.0402	10.024	9.98059	10.0138	9.91379	9.91531	9.88662	9.80334	9.71737	9.67475	9.65974	10.3463	10.0651	9.99933	9.96052	8.79672	8.79206	8.73695	8.77656
3138	10.1993	10.1509	10.153	10.1311	10.1956	10.1103	10.0914	10.0977	10.1257	10.0442	10.0453	10.0181	10.202	10.1745	10.1475	10.1163	10.3007	10.1817	10.1762	10.1022	10.1857	10.0664	10.0377	10.0302	9.92277	9.85307	9.80153	9.7804	10.427	10.1769	10.1064	10.0796	8.85965	8.85244	8.80191	8.83459
3140	10.3567	10.3209	10.3192	10.2953	10.3537	10.254	10.2388	10.2517	10.2871	10.191	10.1948	10.1739	10.3543	10.3404	10.3038	10.2544	10.4695	10.3228	10.3264	10.2357	10.3272	10.2061	10.1623	10.171	10.0207	9.96427	9.9029	9.88565	10.5072	10.2526	10.1643	10.1638	8.941	8.89743	8.88993	8.8972
3142	10.4883	10.4616	10.4654	10.4382	10.4835	10.378	10.3621	10.3872	10.4221	10.3212	10.3201	10.3036	10.4759	10.4795	10.4355	10.3785	10.5842	10.4475	10.4381	10.3591	10.4351	10.3197	10.2882	10.2885	10.133	10.0722	10.001	9.99518	10.5863	10.3271	10.2239	10.2557	9.0113	8.94596	8.97236	8.95894
3144	10.6064	10.579	10.5823	10.5557	10.5945	10.5069	10.4847	10.5153	10.5439	10.4441	10.4348	10.4233	10.5917	10.6011	10.5543	10.5145	10.687	10.5782	10.5458	10.5012	10.5372	10.4383	10.4295	10.409	10.2368	10.181	10.1025	10.1068	10.6705	10.4021	10.2877	10.3409	9.10485	9.03969	9.04817	9.03615
3146	10.725	10.7008	10.6997	10.6754	10.7066	10.6408	10.6099	10.6437	10.6671	10.5714	10.5534	10.545	10.7094	10.7182	10.6787	10.6583	10.7949	10.7019	10.6605	10.6435	10.6414	10.5616	10.5486	10.5102	10.3643	10.307	10.2172	10.2182	10.7816	10.5196	10.414	10.4322	9.20714	9.17062	9.13961	9.13719
3148	10.8534	10.8392	10.8155	10.809	10.8386	10.7783	10.7369	10.7788	10.798	10.7131	10.6942	10.6809	10.8512	10.8458	10.8129	10.8082	10.9605	10.8472	10.8233	10.7919	10.7865	10.727	10.6687	10.6375	10.5083	10.4498	10.3657	10.3602	10.8784	10.6305	10.5599	10.5402	9.2745	9.25121	9.20253	9.21455
3150	11.0221	11.0157	10.9644	10.9807	11.0135	10.9443	10.8956	10.9436	10.9592	10.8845	10.8762	10.8541	11.0274	11.0104	10.974	10.9917	11.148	10.9986	10.9935	10.9612	10.9225	10.8737	10.7901	10.7712	10.6127	10.561	10.4997	10.4865	10.9901	10.7429	10.6638	10.6216	9.34375	9.32396	9.27988	9.3235
3152	11.1774	11.1733	11.1128	11.1433	11.1605	11.0845	11.0378	11.0921	11.1025	11.0305	11.0263	11.0069	11.1709	11.1566	11.1201	11.1401	11.294	11.1467	11.1327	11.1025	11.0589	10.9915	10.9213	10.9174	10.7128	10.6719	10.6407	10.6258	11.089	10.865	10.779	10.716	9.41366	9.39026	9.35583	9.42151
3154	11.3358	11.3105	11.2688	11.2989	11.2911	11.2269	11.183	11.2515	11.2474	11.1677	11.1623	11.1556	11.3074	11.294	11.2738	11.2752	11.4424	11.3171	11.2752	11.2385	11.2025	11.1149	11.0756	11.0908	10.8148	10.7799	10.773	10.7599	11.164	10.9532	10.873	10.8068	9.51374	9.46313	9.43334	9.49209
3156	11.4935	11.4416	11.4352	11.4494	11.4235	11.3693	11.3233	11.4074	11.3932	11.2994	11.2907	11.2994	11.4383	11.4315	11.4255	11.4037	11.5802	11.4666	11.4091	11.3677	11.3249	11.229	11.2077	11.2263	10.9607	10.906	10.8867	10.8588	11.2594	11.0478	10.9657	10.9042	9.62122	9.55581	9.53353	9.57029
3158	11.6305	11.5715	11.5663	11.5742	11.5626	11.5037	11.4464	11.5294	11.5305	11.4251	11.4077	11.4329	11.5748	11.5709	11.5493	11.5259	11.7254	11.6109	11.5537	11.5035	11.4646	11.3748	11.3445	11.3568	11.1264	11.0554	11.0143	10.9644	11.3482	11.1281	11.0622	11.017	9.69954	9.63174	9.62549	9.63611
3160	11.7753	11.7231	11.6982	11.6989	11.7288	11.6657	11.5865	11.6477	11.6821	11.5818	11.5439	11.579	11.7341	11.7253	11.6784	11.6687	11.8735	11.7451	11.6959	11.6567	11.593	11.5099	11.4817	11.481	11.2536	11.1722	11.1321	11.0627	11.4718	11.2184	11.1587	11.1124	9.77901	9.72412	9.75639	9.73602
3162	11.9023	11.8595	11.824	11.8158	11.8763	11.806	11.717	11.764	11.8161	11.7193	11.6645	11.6955	11.8666	11.8604	11.8043	11.8015	12.0093	11.8645	11.823	11.7887	11.7286	11.6409	11.6281	11.6121	11.3888	11.3042	11.2811	11.1957	11.5978	11.3316	11.2877	11.2271	9.85315	9.82119	9.8741	9.83248
3164	12.0429	12.001	11.9634	11.9574	12.0231	11.9458	11.8848	11.9181	11.9555	11.8679	11.8094	11.819	12.0118	12.0007	11.9626	11.956	12.1632	12.0033	11.9541	11.9361	11.8745	11.7878	11.7976	11.7593	11.5081	11.4308	11.4258	11.3427	11.712	11.4319	11.3993	11.3379	9.96147	9.93242	9.96396	9.92564
3166	12.1877	12.1459	12.1204	12.1125	12.1701	12.0838	12.0541	12.0788	12.0957	12.0217	11.9637	11.9451	12.1559	12.1432	12.1283	12.106	12.2992	12.1288	12.0766	12.0706	12.0138	11.9147	11.9395	11.8791	11.636	11.5586	11.5533	11.4788	11.8439	11.5462	11.5328	11.4584	10.0769	10.0603	10.0592	10.037
3168	12.3278	12.2824	12.269	12.2561	12.3113	12.2136	12.1847	12.2173	12.2347	12.1653	12.1097	12.0788	12.3076	12.2864	12.2743	12.2346	12.4311	12.2859	12.2336	12.1983	12.1801	12.0664	12.0831	12.0031	11.7738	11.7001	11.6989	11.6378	11.9427	11.6545	11.6579	11.5922	10.168	10.162	10.133	10.1232
3170	12.4986	12.4377	12.4383	12.4312	12.4718	12.3587	12.3226	12.368	12.3974	12.3265	12.2826	12.2555	12.488	12.453	12.4414	12.3776	12.5655	12.4493	12.3883	12.3455	12.319	12.2035	12.2173	12.1274	11.9006	11.8066	11.8158	11.7672	12.0312	11.7667	11.7244	11.6886	10.2712	10.2619	10.216	10.2299
3172	12.632	12.5698	12.5865	12.578	12.603	12.4886	12.4487	12.5053	12.536	12.4571	12.4222	12.4005	12.6254	12.5945	12.5743	12.5033	12.7008	12.5962	12.5156	12.4785	12.4414	12.3268	12.3401	12.2669	12.0531	11.9225	11.9309	11.8907	12.1199	11.8867	11.7888	11.7847	10.3537	10.3467	10.2907	10.319
3174	12.7605	12.7056	12.7203	12.7149	12.7225	12.6293	12.6087	12.666	12.688	12.5705	12.5512	12.5457	12.7573	12.7406	12.7038	12.6478	12.8641	12.7606	12.6645	12.642	12.5671	12.4559	12.4732	12.4267	12.1757	12.0348	12.0398	12.0143	12.2319	11.9927	11.8587	11.8703	10.4442	10.4305	10.3781	10.391
3176	12.8889	12.8435	12.8567	12.8509	12.8445	12.77	12.7656	12.8189	12.8301	12.6844	12.6788	12.6841	12.8789	12.8822	12.8331	12.7951	13.0059	12.8894	12.7936	12.7957	12.6974	12.5775	12.5996	12.5634	12.2816	12.1843	12.1548	12.1384	12.3698	12.115	11.9996	11.9817	10.5384	10.5238	10.4863	10.4761
3178	13.0193	12.9736	12.9796	12.9755	12.9777	12.9066	12.8936	12.9408	12.9386	12.8243	12.8116	12.8106	13.0018	13.0159	12.959	12.9362	13.1468	13.0116	12.9334	12.9376	12.8543	12.7265	12.7555	12.7096	12.3875	12.3633	12.2959	12.2758	12.4767	12.2217	12.1582	12.1111	10.6363	10.6	10.5716	10.5606
3180	13.1868	13.1285	13.124	13.13	13.1349	13.0637	13.0394	13.0754	13.0581	13.0063	12.97	12.9568	13.1446	13.1701	13.1125	13.0937	13.2949	13.1308	13.065	13.0863	12.9866	12.8643	12.9087	12.8452	12.5033	12.4884	12.4235	12.3994	12.5963	12.3415	12.2759	12.1997	10.7648	10.7004	10.6879	10.6965
3182	13.3245	13.2627	13.2621	13.2711	13.2795	13.1971	13.1634	13.1957	13.1819	13.1565	13.1162	13.0907	13.2702	13.3046	13.2373	13.231	13.4427	13.274	13.205	13.2108	13.1165	12.9985	13.0576	12.9842	12.6673	12.6104	12.5806	12.5506	12.6994	12.4654	12.3946	12.2983	10.8591	10.7938	10.7869	10.8114
3184	13.4719	13.4261	13.4272	13.4308	13.4427	13.3408	13.317	13.3492	13.3513	13.3	13.2888	13.2577	13.4195	13.4505	13.3859	13.3972	13.6049	13.4545	13.3744	13.3596	13.2458	13.1358	13.213	13.131	12.7979	12.7212	12.7203	12.6883	12.7816	12.5471	12.4692	12.3891	10.9442	10.8838	10.8788	10.8956
3186	13.6083	13.5793	13.5925	13.5803	13.5893	13.477	13.46	13.4942	13.5126	13.4291	13.4399	13.4087	13.5584	13.5828	13.5304	13.5432	13.7315	13.5757	13.4834	13.4822	13.3607	13.2676	13.3245	13.2378	12.9119	12.847	12.8234	12.7825	12.8761	12.6346	12.5351	12.4955	11.0231	10.9801	10.9795	10.9857
3188	13.7129	13.6859	13.6908	13.6758	13.6888	13.5916	13.565	13.6036	13.6255	13.5333	13.5358	13.5092	13.6898	13.6912	13.6443	13.641	13.8413	13.6703	13.5987	13.5893	13.488	13.4342	13.4255	13.3358	13.0246	12.9827	12.9272	12.8771	12.9671	12.7132	12.6039	12.6138	11.1032	11.0704	11.0486	11.0755
3190	13.8298	13.808	13.7835	13.77	13.79	13.7127	13.6758	13.7215	13.7334	13.6443	13.628	13.6064	13.8302	13.8113	13.7744	13.7449	13.9412	13.7642	13.7177	13.7072	13.6058	13.5642	13.5233	13.4315	13.1352	13.0877	13.0267	12.9737	13.0971	12.8322	12.7195	12.7153	11.2063	11.1888	11.1341	11.2046
3192	13.941	13.9194	13.8733	13.8714	13.896	13.8282	13.7802	13.8289	13.843	13.7503	13.716	13.7158	13.9457	13.9159	13.8837	13.848	14.042	13.8952	13.8576	13.8155	13.7601	13.6839	13.6522	13.5659	13.2679	13.211	13.18	13.1222	13.2086	12.9642	12.9019	12.8462	11.2867	11.2813	11.2128	11.3014
3194	14.0986	14.0706	14.0179	14.0328	14.0696	13.9757	13.9289	13.9719	14.0082	13.8914	13.8715	13.8926	14.0793	14.062	14.0191	14.0119	14.1697	14.0578	14.0265	13.9675	13.8998	13.8001	13.7962	13.7197	13.3755	13.3086	13.3092	13.2632	13.2924	13.049	13.0065	12.9519	11.3782	11.3537	11.3115	11.3719
3196	14.2417	14.2172	14.1746	14.1881	14.2262	14.1094	14.0588	14.1004	14.1525	14.0204	14.018	14.0413	14.1892	14.1905	14.148	14.1573	14.2758	14.1666	14.1411	14.0919	13.9786	13.8866	13.8944	13.8293	13.4882	13.4124	13.3871	13.3659	13.3803	13.1309	13.0799	13.0437	11.4616	11.4249	11.4207	11.4389
3198	14.3342	14.329	14.2717	14.2812	14.3143	14.2193	14.15	14.1995	14.2363	14.1252	14.1247	14.1223	14.2768	14.282	14.2531	14.2552	14.3924	14.2672	14.2444	14.2118	14.0598	13.9894	14.0051	13.9491	13.5954	13.5229	13.4641	13.4714	13.4646	13.2031	13.1438	13.1333	11.5349	11.4935	11.4975	11.4921
3200	14.4291	14.4449	14.375	14.3708	14.398	14.3381	14.2532	14.3062	14.3188	14.2437	14.2425	14.1975	14.3667	14.3842	14.3678	14.3555	14.5067	14.3535	14.3346	14.3337	14.135	14.0695	14.0955	14.0512	13.6966	13.6057	13.552	13.5576	13.5815	13.3168	13.2165	13.2107	11.6186	11.5914	11.5944	11.5819
3202	14.5142	14.5368	14.4657	14.4466	14.4802	14.4352	14.3519	14.3926	14.3995	14.3296	14.3338	14.2665	14.4537	14.4758	14.4586	14.424	14.6168	14.4424	14.4295	14.4166	14.2679	14.1725	14.1889	14.1584	13.8253	13.7148	13.7088	13.6709	13.6728	13.428	13.3127	13.3027	11.6838	11.6715	11.6606	11.6512
3204	14.6483	14.6393	14.5944	14.5663	14.6121	14.5588	14.5069	14.5182	14.5319	14.4348	14.4478	14.375	14.5844	14.6005	14.5695	14.5192	14.7455	14.5442	14.5362	14.5225	14.3956	14.2827	14.2934	14.267	13.9169	13.8046	13.8289	13.7619	13.7464	13.4914	13.3794	13.3685	11.7781	11.755	11.7335	11.7429
3206	14.7685	14.7281	14.7213	14.68	14.7267	14.6595	14.6306	14.6269	14.6454	14.5254	14.5457	14.4747	14.6966	14.7099	14.6693	14.6103	14.8371	14.6345	14.6349	14.6114	14.4819	14.3751	14.3684	14.3575	14.0219	13.9036	13.9009	13.8284	13.8161	13.5554	13.4553	13.4378	11.8604	11.8341	11.815	11.8428
3208	14.8479	14.8082	14.802	14.7647	14.8058	14.7307	14.7088	14.7177	14.7331	14.6042	14.626	14.5876	14.8047	14.7961	14.7542	14.7186	14.9325	14.767	14.7715	14.7199	14.5786	14.5061	14.4625	14.481	14.1063	14.0028	13.9723	13.9068	13.8706	13.6171	13.5254	13.5044	11.9318	11.8789	11.8797	11.9087
3210	14.9271	14.9029	14.8866	14.864	14.8904	14.8017	14.7899	14.8179	14.8273	14.6954	14.7077	14.7163	14.912	14.8838	14.8483	14.8451	15.0141	14.8809	14.8754	14.8337	14.6475	14.5954	14.5357	14.5556	14.1724	14.0766	14.0421	13.9708	13.956	13.7228	13.6081	13.5662	12.0132	11.9233	11.9672	11.9922
3212	15.0049	14.9741	14.948	14.9416	14.9684	14.8582	14.8539	14.8902	14.8927	14.7667	14.7724	14.7879	14.9794	14.9555	14.9219	14.9226	15.1057	14.9898	14.9521	14.9065	14.7439	14.6673	14.6201	14.6086	14.2594	14.1697	14.153	14.0648	14.0132	13.8163	13.705	13.6601	12.0674	11.9618	12.0299	12.0434
3214	15.121	15.0716	15.0322	15.0574	15.0942	14.9403	14.9532	14.987	14.9814	14.8639	14.8712	14.863	15.0514	15.0537	15.0189	15.0098	15.2214	15.0948	15.0253	14.9817	14.823	14.7346	14.7101	14.6628	14.2966	14.2312	14.2305	14.1354	14.0711	13.8642	13.7637	13.7264	12.1401	12.0408	12.0916	12.0978
3216	15.2021	15.1489	15.1146	15.1469	15.1818	15.0051	15.0279	15.0617	15.0554	14.9365	14.9468	14.9247	15.105	15.1212	15.0929	15.0772	15.2699	15.1388	15.0788	15.0362	14.8902	14.8147	14.7749	14.7174	14.3305	14.2855	14.2855	14.2075	14.1338	13.9058	13.8423	13.7986	12.1926	12.119	12.1465	12.1497
3218	15.239	15.2122	15.188	15.1973	15.2253	15.0776	15.0893	15.1241	15.1407	14.9989	15.0037	14.9984	15.1869	15.1794	15.154	15.1526	15.3042	15.1745	15.1448	15.1092	14.9785	14.9271	14.869	14.8022	14.3601	14.3345	14.3374	14.2897	14.184	13.9325	13.8909	13.8568	12.2325	12.1735	12.1818	12.1775
3220	15.2725	15.2781	15.2779	15.2521	15.2677	15.1578	15.1531	15.1841	15.2295	15.064	15.0591	15.0729	15.2693	15.244	15.2196	15.2314	15.3323	15.2055	15.1884	15.1745	15.0169	14.9779	14.9185	14.8618	14.4088	14.3811	14.3827	14.33	14.2605	13.985	13.9091	13.898	12.2695	12.2464	12.2183	12.2083
3222	15.313	15.3049	15.3203	15.2848	15.2963	15.2002	15.1917	15.2183	15.2637	15.102	15.0995	15.107	15.3018	15.2821	15.2533	15.2627	15.3793	15.2678	15.2471	15.2082	15.0507	14.9901	14.9365	14.9284	14.4769	14.4546	14.4491	14.3798	14.2986	14.0287	13.9278	13.9535	12.2788	12.2727	12.2298	12.2388
3224	15.4064	15.3283	15.3463	15.3431	15.3437	15.2502	15.2424	15.2628	15.2903	15.1564	15.161	15.1414	15.3355	15.3323	15.2909	15.2905	15.4398	15.3318	15.309	15.2469	15.0724	14.9969	14.9526	14.9858	14.504	14.4909	14.4817	14.4101	14.2921	14.0489	13.9406	13.9749	12.2936	12.2636	12.2335	12.3072
3226	15.4646	15.3508	15.3664	15.382	15.3776	15.283	15.2759	15.2969	15.3072	15.193	15.1948	15.1663	15.361	15.3603	15.3192	15.3092	15.4731	15.3557	15.327	15.2638	15.097	15.0152	14.979	15.0132	14.5343	14.5101	14.4912	14.4326	14.2823	14.0713	13.9631	13.9799	12.3096	12.2579	12.2434	12.3608
3228	15.467	15.3944	15.3923	15.398	15.4257	15.3234	15.3135	15.3391	15.3308	15.2271	15.2057	15.2087	15.394	15.3832	15.3637	15.3256	15.5125	15.3865	15.334	15.2842	15.131	15.0427	15.0278	15.0428	14.5621	14.528	14.4988	14.4536	14.3044	14.084	13.9811	13.9825	12.3534	12.3005	12.2823	12.3667
3230	15.4617	15.4439	15.4261	15.4158	15.4786	15.3656	15.3501	15.3809	15.3549	15.2634	15.2166	15.2539	15.4223	15.4085	15.4114	15.3435	15.5346	15.4054	15.3386	15.3078	15.1466	15.0602	15.0614	15.061	14.6157	14.5576	14.5167	14.4811	14.3508	14.0987	14.0366	14	12.4075	12.3747	12.3439	12.3699
3232	15.4782	15.4713	15.4487	15.4346	15.4963	15.3872	15.3668	15.4034	15.3691	15.2908	15.2442	15.2773	15.4494	15.4354	15.4285	15.3785	15.5331	15.433	15.3786	15.3298	15.1595	15.0815	15.1192	15.0923	14.6763	14.5987	14.5534	14.5413	14.3717	14.1115	14.0998	14.0322	12.4368	12.4042	12.3738	12.3822
3234	15.5195	15.5115	15.4955	15.4738	15.508	15.4112	15.3881	15.4333	15.396	15.3295	15.2979	15.3049	15.4906	15.4866	15.4437	15.4468	15.5316	15.4571	15.4263	15.3583	15.1756	15.1051	15.174	15.1172	14.7013	14.6265	14.5805	14.5761	14.3796	14.1429	14.1146	14.0584	12.4689	12.4193	12.3992	12.4193
3236	15.549	15.5384	15.5309	15.4984	15.5147	15.4258	15.4001	15.4528	15.4154	15.3513	15.3289	15.3217	15.5151	15.5165	15.4583	15.4769	15.5617	15.4763	15.4525	15.3812	15.2271	15.1667	15.2072	15.1323	14.7313	14.6753	14.6422	14.5982	14.3857	14.1865	14.1143	14.0986	12.493	12.4275	12.4222	12.4479
3238	15.5901	15.5721	15.5561	15.5292	15.526	15.4534	15.4119	15.4727	15.4561	15.3633	15.3679	15.3392	15.5419	15.5473	15.5066	15.4772	15.637	15.5112	15.4833	15.4233	15.2807	15.2417	15.2407	15.1532	14.7455	14.7133	14.6912	14.6152	14.4011	14.2159	14.1206	14.1232	12.5269	12.4446	12.4604	12.4593
3240	15.6282	15.6017	15.582	15.5612	15.5372	15.4813	15.4299	15.4904	15.4953	15.3748	15.4041	15.3537	15.5631	15.5752	15.555	15.4788	15.6746	15.5334	15.5016	15.4567	15.3	15.263	15.2521	15.1695	14.7518	14.7203	14.6876	14.6234	14.4268	14.2592	14.1489	14.1139	12.5566	12.4686	12.5055	12.474
3242	15.6456	15.6074	15.5919	15.5769	15.5567	15.5039	15.4563	15.5031	15.5106	15.3974	15.4277	15.3707	15.5783	15.598	15.5671	15.5099	15.6764	15.5535	15.5289	15.48	15.3279	15.2791	15.2706	15.1891	14.7621	14.7233	14.6746	14.6363	14.4505	14.2817	14.1759	14.0995	12.576	12.4834	12.5133	12.4987
3244	15.6674	15.6145	15.6035	15.605	15.5965	15.5401	15.4895	15.5218	15.5275	15.4357	15.4644	15.4017	15.5968	15.6306	15.5759	15.5633	15.6765	15.5678	15.5544	15.5049	15.3455	15.2861	15.2882	15.2053	14.7922	14.7383	14.6841	14.656	14.4936	14.2735	14.1897	14.1152	12.6012	12.5081	12.4983	12.5465
3246	15.6835	15.6235	15.615	15.6231	15.6179	15.5594	15.5122	15.5366	15.5409	15.4571	15.4873	15.4263	15.6084	15.6458	15.5863	15.5886	15.6997	15.5721	15.5781	15.5231	15.3668	15.2921	15.3008	15.2379	14.8505	14.7719	14.7248	14.7099	14.5259	14.2651	14.2074	14.1634	12.6187	12.5302	12.4986	12.58
3248	15.7166	15.6521	15.6558	15.6472	15.6302	15.5802	15.5424	15.5684	15.5678	15.4781	15.5219	15.4706	15.6327	15.6554	15.6172	15.6155	15.748	15.582	15.6047	15.5649	15.3907	15.3009	15.3176	15.2795	14.8792	14.799	14.7586	14.7504	14.5701	14.2957	14.2235	14.1945	12.646	12.5868	12.5651	12.6242
3250	15.747	15.6822	15.6997	15.6716	15.6426	15.6	15.5693	15.5982	15.5908	15.499	15.5466	15.5072	15.6558	15.6662	15.6498	15.639	15.7764	15.6208	15.6226	15.5952	15.4243	15.3241	15.3433	15.2979	14.8984	14.8371	14.8064	14.7545	14.6223	14.3556	14.2555	14.22	12.6691	12.6492	12.6441	12.6682
3252	15.7792	15.7206	15.72	15.7097	15.6825	15.6432	15.6035	15.6439	15.6193	15.5386	15.5555	15.5505	15.7056	15.7107	15.6836	15.6728	15.8274	15.7137	15.6623	15.6337	15.4788	15.3881	15.41	15.3177	14.9131	14.8745	14.8628	14.7583	14.6325	14.3798	14.2834	14.2391	12.6881	12.6584	12.6686	12.6734
3254	15.8208	15.7738	15.7535	15.7721	15.7415	15.7041	15.6459	15.7035	15.6598	15.5917	15.5647	15.6057	15.7624	15.773	15.723	15.7167	15.8701	15.7747	15.69	15.6708	15.5003	15.4156	15.4525	15.3327	14.928	14.8831	14.8707	14.7772	14.6252	14.3836	14.2944	14.2423	12.708	12.6486	12.6793	12.6614
3256	15.8326	15.7961	15.7765	15.7951	15.7565	15.7218	15.657	15.7108	15.6833	15.6061	15.5693	15.6215	15.7753	15.7834	15.7395	15.731	15.8833	15.7737	15.6962	15.6625	15.4995	15.4083	15.4539	15.3791	14.9514	14.8888	14.8596	14.8199	14.6211	14.3884	14.3018	14.2489	12.7196	12.6521	12.6819	12.6597
3258	15.8355	15.8091	15.7945	15.7857	15.7513	15.72	15.6453	15.6884	15.71	15.6015	15.5747	15.6258	15.7761	15.7628	15.7587	15.7353	15.8995	15.765	15.7038	15.6343	15.4977	15.4037	15.4503	15.4231	14.9668	14.8925	14.8558	14.8493	14.6371	14.4112	14.3153	14.2609	12.7421	12.689	12.6863	12.6671
3260	15.8421	15.8183	15.8064	15.7797	15.7524	15.7183	15.6426	15.678	15.724	15.6007	15.5848	15.6299	15.7773	15.759	15.7708	15.7366	15.914	15.7695	15.7205	15.6418	15.5191	15.4289	15.4595	15.4279	14.9907	14.9026	14.9049	14.8678	14.6587	14.4396	14.34	14.2942	12.7566	12.7223	12.6939	12.6726
3262	15.8768	15.8247	15.8113	15.8035	15.7861	15.7263	15.6732	15.7172	15.7253	15.6194	15.6131	15.6465	15.7905	15.799	15.7844	15.7527	15.9407	15.7779	15.748	15.7016	15.5466	15.4735	15.4788	15.4286	15.0095	14.914	14.9593	14.884	14.6729	14.4431	14.3545	14.3233	12.7615	12.7386	12.7146	12.679
3264	15.9185	15.8303	15.8171	15.8362	15.83	15.7378	15.7094	15.7699	15.7283	15.6428	15.6443	15.6647	15.8048	15.8422	15.8041	15.7749	15.9559	15.781	15.7583	15.755	15.5478	15.4913	15.4963	15.4356	15.0187	14.9381	14.9546	14.8898	14.6906	14.451	14.3627	14.3372	12.7747	12.7665	12.7499	12.6991
3266	15.9215	15.8413	15.8301	15.846	15.8411	15.7544	15.7228	15.7926	15.7415	15.6474	15.6485	15.6697	15.8176	15.844	15.811	15.7939	15.9645	15.7885	15.7661	15.766	15.5375	15.4908	15.5264	15.4538	15.0312	14.9818	14.9303	14.8937	14.7124	14.4721	14.3738	14.354	12.8221	12.7947	12.7801	12.7314
3268	15.9012	15.875	15.8594	15.8575	15.8347	15.7891	15.7361	15.8102	15.7701	15.6446	15.6371	15.6765	15.845	15.8294	15.8185	15.8341	15.9786	15.81	15.7848	15.7754	15.5509	15.5003	15.553	15.478	15.0711	15.0169	14.9385	14.9054	14.7742	14.5493	14.4099	14.3784	12.9113	12.8564	12.8355	12.8103
3270	15.9067	15.9144	15.8927	15.8765	15.8494	15.821	15.7634	15.8312	15.8032	15.6606	15.6556	15.6954	15.8798	15.8445	15.8372	15.873	16.0142	15.8776	15.8506	15.8028	15.6465	15.5791	15.594	15.547	15.1653	15.0779	15.0346	14.9902	14.828	14.6377	14.4922	14.4357	12.956	12.9032	12.875	12.8726
3272	15.9946	16.0159	15.9721	15.9523	15.9417	15.8842	15.8649	15.9037	15.8842	15.757	15.7767	15.7828	15.9534	15.9543	15.9419	15.9489	16.0944	15.9916	15.9656	15.8785	15.7559	15.683	15.6675	15.6472	15.2258	15.1248	15.1287	15.0804	14.8602	14.6603	14.5361	14.4841	12.986	12.9327	12.8942	12.9109
3274	16.0892	16.112	16.0677	16.038	16.0386	15.9448	15.9569	15.9744	15.9643	15.8549	15.8875	15.8678	16.0124	16.0595	16.0495	16.0181	16.1468	16.049	16.0144	15.9306	15.789	15.7188	15.7016	15.6814	15.2661	15.1589	15.1742	15.1281	14.8976	14.6806	14.5641	14.5375	13.0121	12.9626	12.9167	12.9482
3276	16.1288	16.1239	16.0974	16.0749	16.0793	15.9829	15.9772	16.0052	16.0063	15.8922	15.9041	15.9019	16.0506	16.0889	16.0775	16.0518	16.1784	16.0895	16.0196	15.9641	15.8071	15.7497	15.7287	15.7023	15.3024	15.1986	15.2157	15.1808	14.9166	14.6992	14.5883	14.5942	13.0447	12.9816	12.9459	12.97
3278	16.1641	16.1199	16.1148	16.1203	16.1161	16.0318	15.9936	16.0389	16.0516	15.9306	15.9077	15.9305	16.0958	16.1069	16.0965	16.0887	16.208	16.1172	16.025	16.0083	15.8249	15.7774	15.7587	15.718	15.3249	15.228	15.238	15.2006	14.9482	14.736	14.6162	14.6216	13.0924	13.0096	13.0076	12.9995
3280	16.1935	16.1366	16.1276	16.1508	16.1457	16.0672	16.0228	16.0716	16.0783	15.9637	15.9214	15.949	16.1253	16.1232	16.1186	16.117	16.2478	16.1398	16.089	16.043	15.8748	15.8237	15.8172	15.7693	15.346	15.2743	15.2677	15.2295	14.972	14.78	14.6561	14.6482	13.1204	13.029	13.0448	13.0226
3282	16.251	16.2165	16.1619	16.2015	16.2015	16.1236	16.0979	16.1378	16.1053	16.0309	15.9653	15.9996	16.1778	16.1736	16.1905	16.1731	16.2971	16.1679	16.1897	16.1029	15.9241	15.8712	15.8867	15.8362	15.3668	15.3051	15.2976	15.2562	14.9965	14.8344	14.6896	14.6694	13.1713	13.0507	13.0833	13.0786
3284	16.2971	16.2882	16.1986	16.2502	16.2429	16.1688	16.157	16.1924	16.1281	16.0836	16.0065	16.04	16.2146	16.2186	16.2514	16.2118	16.3222	16.1954	16.2242	16.1453	15.9569	15.9229	15.9163	15.8693	15.4345	15.3388	15.3546	15.2906	15.0233	14.905	14.7629	14.7182	13.2024	13.0734	13.1231	13.1333
3286	16.3316	16.3305	16.2561	16.301	16.2684	16.2209	16.2013	16.2432	16.1762	16.1213	16.0659	16.0696	16.2373	16.2651	16.2912	16.2533	16.3632	16.2747	16.2447	16.2018	15.9997	16.013	15.9442	15.908	15.4864	15.3739	15.4146	15.3351	15.0493	14.9192	14.8101	14.7616	13.1913	13.1102	13.1429	13.1373
3288	16.3682	16.3757	16.3694	16.3674	16.3023	16.2829	16.2503	16.2966	16.2406	16.1648	16.1399	16.1056	16.2566	16.3207	16.3348	16.3059	16.3989	16.3306	16.2596	16.2527	16.0276	16.0461	15.9658	15.9282	15.4897	15.4034	15.4165	15.3607	15.0939	14.8908	14.7879	14.7707	13.175	13.1757	13.163	13.1304
3290	16.3805	16.3945	16.4105	16.3857	16.3297	16.309	16.2701	16.3062	16.2655	16.1849	16.1755	16.1302	16.2803	16.3451	16.3526	16.3198	16.4232	16.3761	16.2971	16.2648	16.0621	16.0329	16.0054	15.9503	15.4874	15.4527	15.3849	15.3917	15.1196	14.8802	14.7531	14.7753	13.1828	13.2017	13.1789	13.1383
3292	16.3976	16.4099	16.4192	16.3797	16.3737	16.3378	16.2778	16.2988	16.2782	16.2041	16.2097	16.1599	16.3257	16.3706	16.376	16.3277	16.4474	16.4258	16.3488	16.279	16.085	16.0248	16.0473	15.9738	15.508	15.49	15.3836	15.4159	15.1598	14.9169	14.7689	14.7903	13.2203	13.2042	13.1994	13.1722
3294	16.4201	16.4229	16.4277	16.383	16.4055	16.3549	16.2861	16.3075	16.292	16.2172	16.2278	16.184	16.3575	16.389	16.3984	16.3423	16.4836	16.4568	16.3933	16.3026	16.109	16.0619	16.0814	16.0178	15.5687	15.5572	15.4508	15.4598	15.1927	14.9582	14.8261	14.8273	13.2426	13.2064	13.2147	13.196
3296	16.4895	16.4723	16.4693	16.4401	16.45	16.3751	16.3308	16.3852	16.3486	16.2502	16.2562	16.2388	16.4115	16.4267	16.449	16.4038	16.5741	16.4784	16.4502	16.3916	16.137	16.1174	16.1257	16.0837	15.6012	15.6026	15.5097	15.5026	15.1897	14.9626	14.8532	14.8546	13.2445	13.2254	13.2239	13.2001
3298	16.5588	16.5269	16.5256	16.5062	16.4945	16.3933	16.3764	16.4619	16.4047	16.2849	16.2864	16.2898	16.4559	16.4602	16.4984	16.4643	16.6154	16.4824	16.4634	16.4585	16.1654	16.1388	16.1372	16.1072	15.6	15.6047	15.5057	15.4985	15.1783	14.9557	14.8507	14.856	13.2477	13.2501	13.2338	13.2063
3300	16.5699	16.5402	16.5343	16.5164	16.5067	16.3973	16.3862	16.4703	16.4191	16.3038	16.3084	16.3005	16.4646	16.4698	16.5029	16.4737	16.5858	16.4886	16.4262	16.4477	16.2182	16.1588	16.1362	16.1116	15.5977	15.5996	15.49	15.4745	15.1811	14.9597	14.8488	14.8504	13.2795	13.2628	13.2461	13.2218
3302	16.5675	16.5505	16.5261	16.5101	16.5156	16.4019	16.3918	16.4616	16.4325	16.3326	16.3464	16.3037	16.4687	16.4832	16.4954	16.4722	16.5514	16.5015	16.4039	16.4199	16.2481	16.1662	16.1399	16.1117	15.621	15.5995	15.5046	15.4806	15.2089	14.9979	14.8649	14.8534	13.3294	13.2822	13.2864	13.256
3304	16.5749	16.5645	16.5246	16.5117	16.5305	16.4155	16.4079	16.4667	16.4398	16.3496	16.3737	16.3068	16.4779	16.4976	16.5052	16.4811	16.5666	16.541	16.4355	16.4287	16.245	16.1639	16.1676	16.1342	15.6756	15.613	15.5739	15.5264	15.2238	15.0308	14.8914	14.8575	13.3398	13.2921	13.3034	13.2734
3306	16.619	16.5936	16.5623	16.5542	16.5575	16.4634	16.4737	16.5039	16.448	16.3679	16.4029	16.3292	16.5061	16.5374	16.5601	16.5129	16.615	16.5896	16.4751	16.4814	16.2435	16.1621	16.202	16.1646	15.7025	15.6284	15.6181	15.5561	15.1928	15.0165	14.8994	14.8582	13.3166	13.2795	13.2827	13.271
3308	16.6533	16.613	16.6005	16.5906	16.5728	16.4981	16.5193	16.5284	16.4522	16.3786	16.4154	16.3442	16.5221	16.5658	16.6021	16.5352	16.6298	16.586	16.489	16.507	16.2587	16.162	16.2022	16.1642	15.7116	15.6412	15.6219	15.5557	15.1563	14.9822	14.8964	14.86	13.3037	13.2673	13.2586	13.2642
3310	16.6503	16.6058	16.5888	16.5797	16.5569	16.4968	16.4904	16.5164	16.4522	16.3654	16.396	16.3544	16.5139	16.5633	16.5971	16.5293	16.6227	16.5322	16.5113	16.4928	16.2739	16.1632	16.1885	16.1409	15.7109	15.6402	15.6204	15.553	15.1662	14.9774	14.8946	14.8616	13.3167	13.2745	13.2611	13.2601
3312	16.6406	16.5939	16.5605	16.5579	16.5339	16.4913	16.4449	16.5	16.4517	16.3459	16.3709	16.3707	16.5038	16.5554	16.5813	16.5209	16.6184	16.5069	16.5241	16.48	16.2768	16.17	16.1848	16.1314	15.7041	15.6217	15.618	15.5634	15.201	14.9979	14.8873	14.8511	13.3302	13.2852	13.2802	13.2588
3314	16.6355	16.6033	16.5607	16.5624	16.5411	16.4972	16.4475	16.5078	16.4593	16.3573	16.3695	16.3848	16.5168	16.5577	16.5824	16.5344	16.6233	16.5362	16.5317	16.5013	16.2674	16.1998	16.1916	16.1501	15.6976	15.6059	15.6138	15.5954	15.2098	15.0088	14.8767	14.8343	13.3101	13.2855	13.2827	13.2561
3316	16.6248	16.6398	16.6186	16.598	16.5794	16.5096	16.4802	16.5326	16.4815	16.3992	16.3827	16.4071	16.5475	16.5677	16.5885	16.5722	16.6276	16.565	16.5401	16.5446	16.2591	16.2188	16.1985	16.1666	15.6831	15.6075	15.6073	15.6055	15.1808	14.9669	14.8752	14.8307	13.2514	13.2638	13.2664	13.2377
3318	16.6108	16.6545	16.656	16.617	16.5932	16.5162	16.4931	16.5394	16.4898	16.4198	16.3871	16.4145	16.5502	16.5651	16.5843	16.5832	16.607	16.5515	16.5344	16.5501	16.2301	16.1886	16.1909	16.1547	15.6408	15.6208	15.5591	15.5596	15.158	14.9062	14.876	14.8412	13.243	13.2518	13.2578	13.2309
3320	16.5803	16.6137	16.6201	16.5797	16.5654	16.5074	16.4723	16.5025	16.484	16.3979	16.3798	16.3937	16.5078	16.5405	16.5541	16.5473	16.5564	16.5208	16.5097	16.5171	16.1956	16.1423	16.1736	16.1373	15.6266	15.632	15.5226	15.516	15.163	14.9128	14.8843	14.8539	13.3324	13.2696	13.2824	13.2765
3322	16.5571	16.5708	16.5702	16.538	16.5437	16.499	16.4557	16.4685	16.4777	16.3736	16.3773	16.3766	16.4803	16.5233	16.5268	16.5184	16.5395	16.5219	16.502	16.4959	16.2224	16.1505	16.18	16.1423	15.6839	15.6505	15.5577	15.5269	15.1726	14.9743	14.9255	14.8842	13.4041	13.2938	13.3167	13.3381
3324	16.5922	16.5974	16.5861	16.5651	16.5819	16.5173	16.4819	16.492	16.4716	16.3916	16.4008	16.3873	16.5256	16.5397	16.5525	16.5449	16.5991	16.57	16.5262	16.5047	16.2977	16.2161	16.2263	16.175	15.7431	15.6697	15.6234	15.557	15.1712	15.0042	14.9594	14.9193	13.3759	13.3058	13.3227	13.3527
3326	16.6689	16.6654	16.6642	16.6422	16.6562	16.5543	16.5277	16.5472	16.4643	16.4331	16.4376	16.403	16.593	16.5722	16.6148	16.5926	16.6612	16.604	16.5491	16.5178	16.3247	16.2475	16.2569	16.1986	15.7344	15.6609	15.646	15.577	15.1612	14.9859	14.9564	14.9192	13.3233	13.3104	13.3085	13.3509
3328	16.6974	16.68	16.7021	16.6753	16.6756	16.5591	16.5377	16.5685	16.4688	16.4457	16.4473	16.4077	16.6007	16.5939	16.6339	16.602	16.6735	16.5838	16.537	16.5198	16.2952	16.2267	16.265	16.2024	15.6977	15.6338	15.65	15.602	15.1575	14.9676	14.9467	14.8953	13.3155	13.3061	13.2995	13.3468
3330	16.7024	16.6481	16.6797	16.6761	16.6528	16.5261	16.5165	16.5739	16.4938	16.4385	16.4331	16.4067	16.5767	16.6315	16.6238	16.5889	16.6788	16.5539	16.5159	16.5167	16.2694	16.2052	16.2718	16.205	15.695	15.6279	15.6523	15.6152	15.1676	14.9725	14.9411	14.8853	13.3408	13.3005	13.2918	13.3255
3332	16.7038	16.6256	16.6565	16.6742	16.6381	16.5086	16.5038	16.5796	16.5107	16.4367	16.4249	16.4054	16.5621	16.6559	16.6152	16.5815	16.6738	16.5625	16.5195	16.5223	16.2794	16.2292	16.2683	16.218	15.7389	15.6571	15.6624	15.6121	15.1755	14.9814	14.933	14.884	13.3605	13.2975	13.2844	13.3042
3334	16.7141	16.6454	16.6723	16.6744	16.648	16.5347	16.5199	16.5967	16.5114	16.4542	16.451	16.421	16.5674	16.6605	16.6048	16.5896	16.6505	16.6022	16.5473	16.5351	16.2962	16.2808	16.2515	16.2298	15.759	15.6769	15.6724	15.6093	15.1662	14.9817	14.9251	14.8831	13.3632	13.3008	13.2854	13.2991
3336	16.7288	16.6759	16.7024	16.6716	16.6579	16.5675	16.5436	16.613	16.5105	16.4757	16.4854	16.4446	16.5755	16.6601	16.5902	16.6019	16.6361	16.6183	16.567	16.5412	16.2937	16.2963	16.2485	16.2366	15.7078	15.665	15.6661	15.6111	15.1493	14.9711	14.9121	14.8817	13.3649	13.3098	13.2938	13.3008
3338	16.7318	16.6854	16.7033	16.6637	16.6419	16.5725	16.5499	16.6067	16.509	16.4825	16.478	16.4509	16.5711	16.6515	16.5903	16.5897	16.6425	16.5979	16.5818	16.5454	16.2843	16.2808	16.2604	16.2482	15.6481	15.6518	15.6481	15.6128	15.1506	14.9698	14.903	14.8806	13.3891	13.3248	13.3084	13.3221
3340	16.73	16.6871	16.6727	16.6472	16.6046	16.5659	16.5482	16.583	16.5032	16.4799	16.4452	16.4494	16.5615	16.629	16.6065	16.5556	16.6575	16.5785	16.5979	16.5598	16.2821	16.274	16.2753	16.2577	15.6726	15.6755	15.6533	15.6159	15.1841	15.0124	14.9071	14.8896	13.4373	13.3779	13.3606	13.3974
3342	16.7337	16.6931	16.6564	16.6481	16.6016	16.5726	16.5546	16.5881	16.5147	16.4825	16.443	16.4622	16.5733	16.6285	16.6251	16.5656	16.6726	16.6151	16.6072	16.5851	16.3056	16.2966	16.3137	16.2769	15.7676	15.7616	15.6862	15.6323	15.2138	15.0643	14.9158	14.9152	13.4678	13.4106	13.3984	13.4406
3344	16.7525	16.7209	16.7039	16.6869	16.6696	16.6096	16.5832	16.6441	16.5743	16.5232	16.4956	16.5212	16.6363	16.6864	16.6646	16.6491	16.6973	16.6841	16.6193	16.6361	16.3376	16.3291	16.371	16.3107	15.8225	15.8219	15.7111	15.656	15.2492	15.0852	14.9342	14.9301	13.5036	13.4346	13.4248	13.4535
3346	16.7729	16.7541	16.7696	16.7274	16.7302	16.6468	16.6137	16.695	16.6267	16.5656	16.546	16.569	16.684	16.7429	16.6997	16.7184	16.7254	16.7096	16.6414	16.6743	16.3656	16.3691	16.4073	16.3409	15.8552	15.841	15.7385	15.7107	15.2903	15.1157	14.9855	14.9577	13.5322	13.4601	13.4519	13.4697
3348	16.8232	16.8189	16.8067	16.7679	16.7515	16.6961	16.6508	16.7392	16.6575	16.5989	16.5921	16.596	16.7179	16.8003	16.7462	16.7393	16.7957	16.7329	16.7156	16.7213	16.4095	16.4347	16.4592	16.389	15.8832	15.848	15.7744	15.7824	15.3091	15.1328	15.0271	14.9926	13.5549	13.4836	13.4818	13.4921
3350	16.904	16.9157	16.8572	16.835	16.7794	16.7598	16.6997	16.7963	16.6937	16.6413	16.6493	16.628	16.7534	16.8737	16.8172	16.7586	16.8622	16.7604	16.7734	16.7716	16.4487	16.4682	16.4892	16.4155	15.9123	15.8681	15.8069	15.8078	15.3322	15.1396	15.0536	15.0265	13.5764	13.5293	13.531	13.5302
3352	16.9355	16.9384	16.8832	16.8648	16.8104	16.7899	16.7336	16.8228	16.7171	16.6631	16.6723	16.6484	16.7742	16.8987	16.8369	16.7851	16.9108	16.8118	16.8008	16.8011	16.5101	16.4889	16.4977	16.4451	15.946	15.9209	15.8777	15.8355	15.3565	15.1469	15.085	15.0722	13.6009	13.5658	13.5619	13.5662
3354	16.9513	16.9242	16.8968	16.8864	16.8618	16.8226	16.7836	16.8459	16.7508	16.6905	16.6895	16.6854	16.807	16.9155	16.8373	16.838	16.9619	16.8675	16.8213	16.8384	16.5563	16.5054	16.5053	16.4771	15.9788	15.9553	15.9266	15.8596	15.415	15.2062	15.1238	15.1041	13.6655	13.6205	13.6003	13.6292
3356	16.9686	16.9281	16.9141	16.9132	16.9042	16.8501	16.8235	16.868	16.7771	16.7188	16.7097	16.7121	16.8376	16.9329	16.8468	16.8798	17.0008	16.9251	16.8587	16.8591	16.6093	16.5359	16.5511	16.5264	16.0417	16.0015	15.9833	15.9237	15.47	15.2863	15.1836	15.1693	13.7021	13.662	13.6316	13.6793
3358	17.0201	17.0264	16.9658	16.9863	16.9558	16.9119	16.9	16.9339	16.8374	16.7972	16.7769	16.7581	16.9199	16.9846	16.9219	16.9446	17.0681	17.0092	16.9302	16.895	16.6705	16.5837	16.6372	16.6007	16.084	16.0461	16.0349	15.9955	15.5175	15.3235	15.2272	15.2184	13.7285	13.6951	13.6811	13.7169
3360	17.0752	17.1334	17.0393	17.0706	17.0054	16.9738	16.9704	17.0007	16.905	16.8723	16.8457	16.8052	16.989	17.0391	17.0053	17.0067	17.1075	17.0459	16.9709	16.9295	16.7058	16.6261	16.6809	16.639	16.1326	16.0959	16.0826	16.0562	15.5719	15.3738	15.2983	15.2492	13.7598	13.7341	13.7473	13.7594
3362	17.1158	17.1635	17.0969	17.1181	17.0521	17.0112	17.0137	17.0369	16.9649	16.911	16.8802	16.8496	17.018	17.0769	17.0496	17.0474	17.1164	17.0677	17.0106	16.9821	16.7551	16.6975	16.7236	16.6919	16.1849	16.1533	16.1434	16.1384	15.606	15.4242	15.36	15.2825	13.8493	13.7855	13.8115	13.8185
3364	17.1732	17.1858	17.1764	17.1708	17.1282	17.0579	17.0749	17.0824	17.0417	16.9683	16.9243	16.916	17.0542	17.1245	17.1042	17.0983	17.1345	17.1008	17.0511	17.0524	16.8037	16.7683	16.7666	16.7428	16.2728	16.2106	16.1923	16.1993	15.6649	15.511	15.4221	15.3445	13.9737	13.8818	13.9222	13.9381
3366	17.2372	17.225	17.2367	17.2136	17.1841	17.1079	17.1151	17.133	17.0875	17.0139	16.9869	16.9819	17.1184	17.1764	17.1629	17.1527	17.2274	17.2009	17.148	17.1306	16.9125	16.8993	16.8642	16.8411	16.4074	16.3011	16.2685	16.2917	15.7163	15.5895	15.5064	15.4533	14.0154	13.9398	13.9815	14.005
3368	17.3717	17.3482	17.331	17.3141	17.2687	17.211	17.1929	17.2367	17.1498	17.1035	17.1204	17.1085	17.2419	17.2773	17.2938	17.2606	17.3683	17.3169	17.2637	17.271	17.0017	17.0039	16.9741	16.9397	16.452	16.3543	16.3194	16.3573	15.8126	15.6356	15.5464	15.4954	14.0397	14.0109	14.0193	14.0432
3370	17.462	17.4427	17.4118	17.393	17.3302	17.2844	17.2512	17.31	17.2022	17.1686	17.201	17.193	17.3119	17.3513	17.3836	17.3342	17.417	17.3591	17.3183	17.3329	17.0335	17.0137	17.0215	16.9898	16.4627	16.3972	16.3874	16.3988	15.9072	15.6868	15.5872	15.5121	14.0671	14.0749	14.0535	14.0779
3372	17.4892	17.4813	17.4518	17.4332	17.3909	17.3247	17.3082	17.3728	17.274	17.2268	17.2265	17.2372	17.3526	17.4105	17.4193	17.3788	17.428	17.4072	17.3803	17.3439	17.0579	17.0094	17.0686	17.0494	16.4849	16.4393	16.4521	16.4412	15.9553	15.7367	15.6203	15.5357	14.1461	14.1379	14.1202	14.1322
3374	17.5124	17.5138	17.5009	17.4777	17.4576	17.3685	17.3686	17.4334	17.3483	17.2845	17.2509	17.2776	17.388	17.469	17.4497	17.4177	17.4444	17.449	17.4159	17.363	17.1031	17.051	17.1108	17.0933	16.5668	16.5169	16.5059	16.4976	16.002	15.8138	15.6831	15.6327	14.2265	14.2155	14.2101	14.2039
3376	17.5723	17.5618	17.552	17.5378	17.5159	17.4521	17.4368	17.4819	17.4085	17.3304	17.3129	17.3358	17.4371	17.5342	17.495	17.4641	17.5385	17.536	17.4515	17.4361	17.2101	17.1874	17.1945	17.1756	16.6587	16.6279	16.5886	16.5858	16.0449	15.8654	15.7469	15.7577	14.2993	14.272	14.2574	14.2647
3378	17.6847	17.6429	17.6419	17.6535	17.6012	17.5777	17.5432	17.5585	17.491	17.4029	17.4253	17.4289	17.5059	17.6306	17.5768	17.5382	17.6458	17.6186	17.4927	17.5363	17.2906	17.2804	17.2612	17.2446	16.7252	16.7124	16.659	16.6529	16.1166	15.9213	15.8041	15.8221	14.3945	14.3422	14.3127	14.3548
3380	17.7514	17.7088	17.7157	17.7241	17.6606	17.6376	17.6032	17.6191	17.5365	17.4513	17.501	17.4956	17.5629	17.6983	17.6356	17.5998	17.709	17.6909	17.6179	17.6013	17.3904	17.3327	17.3263	17.3051	16.8096	16.8182	16.7697	16.7457	16.1664	15.9793	15.8795	15.8907	14.4437	14.3855	14.3544	14.4059
3382	17.8311	17.7983	17.8058	17.8079	17.7393	17.6854	17.6712	17.7228	17.5943	17.5336	17.6063	17.5816	17.665	17.8083	17.7102	17.7055	17.7847	17.7654	17.7813	17.6901	17.4614	17.3749	17.4015	17.3668	16.8676	16.8763	16.8446	16.8071	16.2277	16.0177	15.9325	15.9352	14.4976	14.4229	14.4231	14.4588
3384	17.8892	17.8713	17.8787	17.8717	17.7952	17.7206	17.715	17.7893	17.6411	17.5977	17.6707	17.6378	17.7332	17.8712	17.7702	17.7821	17.8317	17.7943	17.8272	17.7382	17.4983	17.4301	17.4614	17.4247	16.9588	16.9183	16.8895	16.8333	16.2868	16.049	15.9926	15.9909	14.5329	14.4624	14.4864	14.5048
3386	17.94	17.9281	17.8988	17.9086	17.8417	17.7805	17.7529	17.8158	17.7017	17.66	17.682	17.6658	17.7862	17.8876	17.8439	17.8303	17.9014	17.8327	17.8441	17.773	17.5449	17.512	17.5579	17.5073	17.0152	16.9565	16.9247	16.857	16.3271	16.0833	16.035	16.0292	14.573	14.5262	14.5408	14.5419
3388	17.9933	17.9815	17.9162	17.9519	17.8928	17.849	17.7979	17.8382	17.7709	17.729	17.6902	17.6896	17.8302	17.9058	17.924	17.8748	17.9458	17.8749	17.8691	17.8057	17.5807	17.5548	17.6136	17.5566	17.0523	17.0126	16.9644	16.9009	16.3735	16.1764	16.0876	16.068	14.6122	14.6037	14.6053	14.5903
3390	18.0345	18.0204	17.9499	17.9864	17.9315	17.8967	17.8435	17.8838	17.8234	17.7786	17.7311	17.7292	17.8794	17.9316	17.957	17.9173	17.9818	17.9309	17.9369	17.8649	17.661	17.6295	17.6555	17.5978	17.088	17.092	17.0258	16.9868	16.3901	16.2371	16.134	16.1229	14.6706	14.6465	14.6394	14.6253
3392	18.099	18.0763	18.018	18.0377	17.9879	17.9626	17.9153	17.9756	17.8931	17.8433	17.81	17.8022	17.9483	17.9784	17.9905	17.9788	18.0155	17.9791	17.9971	17.952	17.7063	17.6774	17.6837	17.6308	17.1151	17.138	17.0654	17.0243	16.4083	16.2852	16.1724	16.1553	14.7601	14.693	14.6855	14.6896
3394	18.1344	18.1049	18.067	18.0686	18.0241	17.9932	17.964	18.021	17.9202	17.8772	17.8571	17.846	17.9825	18.0144	18.0141	18.0137	18.0376	18.0367	18.0242	17.9997	17.7348	17.7168	17.7032	17.6905	17.1611	17.1831	17.1253	17.0552	16.4249	16.3241	16.2284	16.2046	14.7869	14.7149	14.7105	14.7159
3396	18.1647	18.131	18.1267	18.1084	18.0822	18.0267	18.0312	18.0672	17.9349	17.9207	17.9098	17.9043	18.0287	18.0854	18.0683	18.0611	18.0674	18.0963	18.0475	18.0462	17.7537	17.7431	17.7245	17.7501	17.1714	17.1922	17.1572	17.0729	16.4323	16.318	16.2388	16.2201	14.7891	14.7041	14.7164	14.7008
3398	18.1795	18.1456	18.1734	18.1363	18.1173	18.0444	18.064	18.0956	17.9427	17.9426	17.9405	17.937	18.0509	18.1285	18.1031	18.0881	18.083	18.0968	18.0598	18.067	17.7323	17.7217	17.7347	17.7333	17.165	17.155	17.1527	17.0611	16.4392	16.3052	16.2275	16.1934	14.7851	14.6959	14.719	14.6859
3400	18.1737	18.1226	18.1487	18.1106	18.104	17.9982	18.0082	18.0701	17.9268	17.8923	17.9203	17.9178	18.0265	18.1083	18.0964	18.0779	18.1028	18.0738	18.0703	18.0459	17.6955	17.6904	17.7331	17.677	17.1605	17.1286	17.1427	17.0448	16.4555	16.3122	16.2204	16.1737	14.7589	14.7021	14.7336	14.6985
3402	18.1646	18.0886	18.0975	18.0706	18.0794	17.945	17.9384	18.0326	17.907	17.8287	17.8881	17.8915	18.0014	18.0749	18.0805	18.0603	18.1089	18.0587	18.0665	18.0218	17.7063	17.6813	17.7243	17.6552	17.1769	17.1408	17.1386	17.0492	16.4768	16.3222	16.2373	16.1996	14.7329	14.7073	14.755	14.7196
3404	18.1527	18.0878	18.0878	18.0688	18.0589	17.9557	17.9419	18.0265	17.9092	17.8301	17.8796	17.8849	18.0113	18.0658	18.0649	18.0437	18.0942	18.0558	18.0453	18.0273	17.7483	17.6901	17.7035	17.6663	17.1975	17.1516	17.1321	17.0661	16.4831	16.3212	16.256	16.2343	14.7528	14.7172	14.7633	14.7263
3406	18.136	18.0993	18.1073	18.0811	18.0299	17.9855	17.9793	18.0261	17.9178	17.8589	17.8755	17.874	18.0265	18.0616	18.0471	18.018	18.0766	18.057	18.0258	18.037	17.7647	17.6988	17.6886	17.6738	17.1912	17.1386	17.1276	17.0706	16.4821	16.3034	16.2467	16.2251	14.8014	14.7349	14.7745	14.7349
3408	18.128	18.0977	18.115	18.0832	18.0141	17.989	17.9854	18.0178	17.9183	17.8666	17.8643	17.8659	18.0219	18.0606	18.0415	18.0045	18.0606	18.0302	18.0179	18.0184	17.7431	17.6868	17.6948	17.657	17.1724	17.1084	17.1268	17.0518	16.4813	16.2866	16.222	16.1835	14.8211	14.7517	14.7725	14.7421
3410	18.1155	18.0697	18.0986	18.0624	18.0027	17.9539	17.9571	17.9868	17.9131	17.8509	17.8371	17.8548	17.9894	18.0476	18.0522	17.9938	18.0399	17.9897	18.0092	17.9599	17.7283	17.6761	17.7048	17.6398	17.1711	17.101	17.1199	17.0388	16.4899	16.3022	16.2165	16.1713	14.8346	14.7826	14.749	14.7436
3412	18.1028	18.0426	18.0797	18.0442	17.9935	17.9297	17.9325	17.966	17.9077	17.8395	17.8208	17.8468	17.9673	18.035	18.0551	17.9866	18.0349	17.9783	17.9888	17.9353	17.7255	17.6906	17.7078	17.6418	17.1833	17.1324	17.0796	17.0565	16.4878	16.3295	16.2309	16.1908	14.8329	14.8038	14.7249	14.7388
3414	18.1033	18.0185	18.0565	18.0411	17.9732	17.9334	17.9088	17.9737	17.8779	17.8285	17.8199	17.8375	17.9479	18.0296	18.0035	17.9837	18.032	17.9689	17.9603	17.9398	17.7059	17.7044	17.7101	17.6444	17.18	17.1533	17.036	17.0727	16.4353	16.3125	16.2303	16.2044	14.802	14.7629	14.697	14.7171
3416	18.0983	17.9908	18.0183	18.035	17.9465	17.934	17.8796	17.9804	17.8354	17.8087	17.8171	17.8189	17.921	18.0208	17.9344	17.9751	18.0084	17.9504	17.9381	17.9394	17.6563	17.6812	17.6838	17.6311	17.1106	17.1078	17.0086	17.0436	16.3459	16.2357	16.1683	16.1708	14.7625	14.6921	14.658	14.685
3418	18.0375	17.9652	17.9784	17.9997	17.9154	17.8935	17.8461	17.9312	17.7909	17.7609	17.7782	17.7661	17.8599	17.9784	17.9015	17.928	17.9296	17.893	17.8892	17.8782	17.556	17.6068	17.5948	17.5587	17.0243	17.0296	16.972	16.9807	16.2871	16.1775	16.0974	16.1104	14.6978	14.6463	14.6266	14.6476
3420	17.9147	17.9212	17.8984	17.9136	17.8521	17.8105	17.7943	17.8216	17.7132	17.6702	17.6926	17.6698	17.7633	17.8865	17.8631	17.8339	17.8414	17.8332	17.8282	17.7737	17.4911	17.5415	17.5273	17.4894	16.9675	16.9604	16.9327	16.9263	16.2276	16.1189	16.0283	16.0392	14.6035	14.5638	14.5831	14.5535
3422	17.8464	17.8703	17.8281	17.8442	17.7892	17.7475	17.7362	17.7475	17.6532	17.6111	17.6242	17.5981	17.689	17.8073	17.8167	17.769	17.7721	17.7473	17.7425	17.7031	17.4366	17.4509	17.4806	17.4121	16.9026	16.8342	16.8478	16.8194	16.1806	16.0592	15.9343	15.9126	14.5578	14.5216	14.5468	14.4954
3424	17.7758	17.7501	17.7258	17.7295	17.6722	17.6519	17.6121	17.6505	17.547	17.5262	17.4996	17.504	17.5809	17.6818	17.7077	17.6638	17.6812	17.6343	17.6391	17.5925	17.3842	17.3601	17.4259	17.3288	16.8621	16.7687	16.7821	16.737	16.1177	15.9985	15.8843	15.8503	14.5154	14.4854	14.475	14.4367
3426	17.7118	17.6481	17.6285	17.6271	17.5778	17.571	17.523	17.5783	17.4632	17.4534	17.4037	17.4264	17.5085	17.5912	17.6159	17.5882	17.606	17.5718	17.5729	17.5219	17.294	17.2875	17.3697	17.257	16.7887	16.7384	16.7143	16.666	16.0593	15.924	15.8434	15.8042	14.4825	14.4465	14.4138	14.3887
3428	17.6086	17.572	17.5522	17.5501	17.4869	17.4726	17.4582	17.4943	17.3742	17.3588	17.3342	17.3406	17.4365	17.536	17.524	17.5196	17.4858	17.4901	17.4791	17.4419	17.178	17.1961	17.2738	17.168	16.721	16.7075	16.6457	16.5922	16.0057	15.8666	15.8102	15.7657	14.4137	14.3743	14.3734	14.3452
3430	17.4898	17.4964	17.4598	17.4696	17.3924	17.367	17.3895	17.4018	17.2858	17.2562	17.2675	17.2527	17.366	17.4777	17.4233	17.4424	17.4087	17.4274	17.4103	17.3702	17.1047	17.1386	17.1968	17.1239	16.601	16.6194	16.575	16.5253	15.9348	15.7834	15.736	15.6943	14.354	14.2834	14.3247	14.2911
3432	17.4036	17.438	17.3931	17.4015	17.321	17.2725	17.3022	17.3262	17.218	17.1785	17.2037	17.178	17.2875	17.3894	17.3346	17.3619	17.3643	17.3388	17.3178	17.2782	17.0227	17.055	17.0863	17.0772	16.4816	16.5039	16.4905	16.4351	15.8743	15.7155	15.6648	15.6064	14.3242	14.2352	14.2888	14.2514
3434	17.3017	17.3536	17.2871	17.2965	17.2239	17.1509	17.1653	17.2228	17.1168	17.0724	17.1185	17.0857	17.1859	17.2639	17.2145	17.2509	17.3116	17.269	17.2428	17.1635	16.9636	16.9886	16.9949	17.0212	16.419	16.4376	16.4356	16.3813	15.7702	15.6215	15.612	15.5714	14.2828	14.1749	14.2426	14.1903
3436	17.2306	17.2778	17.2162	17.227	17.1546	17.073	17.0805	17.1494	17.0404	17.0037	17.0514	17.0079	17.1084	17.1781	17.1389	17.1629	17.2123	17.2011	17.1695	17.0975	16.8851	16.882	16.9	16.9182	16.3494	16.3522	16.3598	16.3096	15.6951	15.5365	15.5449	15.5381	14.2185	14.1312	14.192	14.1404
3438	17.1364	17.1559	17.1384	17.1339	17.0645	16.9668	17.0011	17.0539	16.9268	16.9038	16.9337	16.886	17.0035	17.0748	17.0457	17.0409	17.0742	17.1083	17.0807	17.0072	16.8096	16.7787	16.8007	16.7993	16.2916	16.2772	16.2924	16.2465	15.6142	15.4763	15.4743	15.4784	14.0815	14.0737	14.0774	14.0529
3440	17.0529	17.0453	17.0547	17.0487	16.9796	16.879	16.93	16.9734	16.8339	16.8155	16.8344	16.7858	16.9075	16.9876	16.9672	16.9422	16.9713	16.9981	16.9876	16.9284	16.6935	16.697	16.7157	16.685	16.2112	16.1732	16.1704	16.1217	15.5371	15.4028	15.3582	15.3361	13.9938	14.0175	13.9692	13.9807
3442	16.9225	16.9258	16.9312	16.9364	16.8536	16.7581	16.7999	16.8644	16.7348	16.7204	16.7104	16.6744	16.7759	16.873	16.8682	16.8133	16.8446	16.8374	16.8357	16.7801	16.556	16.594	16.6045	16.546	16.1339	16.0782	16.0524	15.9829	15.4504	15.3271	15.271	15.2151	13.9231	13.923	13.8693	13.9013
3444	16.7872	16.8043	16.7754	16.8067	16.7259	16.639	16.6648	16.7441	16.6307	16.6187	16.5821	16.5629	16.6627	16.7603	16.7605	16.6875	16.7465	16.7373	16.7278	16.6504	16.4534	16.4948	16.5064	16.4337	15.9859	15.9647	15.9609	15.8904	15.3441	15.2269	15.1417	15.0981	13.8644	13.8147	13.7675	13.803
3446	16.7036	16.7016	16.6866	16.7039	16.6271	16.5474	16.5665	16.6219	16.5129	16.5034	16.4731	16.4392	16.5766	16.6667	16.6573	16.5945	16.6339	16.6366	16.6119	16.5481	16.3154	16.3529	16.3498	16.303	15.8495	15.8348	15.8565	15.7908	15.2573	15.1321	15.0324	14.9929	13.7867	13.7384	13.6929	13.7296
3448	16.6079	16.5766	16.5882	16.5662	16.5042	16.4351	16.4544	16.4736	16.3625	16.3558	16.3503	16.2886	16.4799	16.5515	16.5246	16.4897	16.531	16.5376	16.5128	16.4447	16.204	16.2455	16.2333	16.2101	15.7686	15.7334	15.7533	15.696	15.1408	15.0066	14.9462	14.9358	13.6897	13.6303	13.6077	13.6381
3450	16.5041	16.4747	16.4967	16.4522	16.3974	16.3427	16.3648	16.3562	16.2582	16.2382	16.2496	16.1997	16.3733	16.4497	16.4201	16.3975	16.4224	16.388	16.3801	16.3534	16.0636	16.1153	16.1343	16.1294	15.6774	15.6109	15.6028	15.5579	15.0553	14.9047	14.8525	14.8701	13.6129	13.5578	13.5493	13.5664
3452	16.3361	16.333	16.3499	16.2978	16.2493	16.2105	16.2279	16.2128	16.1388	16.095	16.1189	16.107	16.2198	16.3062	16.2923	16.2701	16.287	16.2425	16.2386	16.223	15.9541	15.9956	16.0349	16.0476	15.5871	15.5272	15.5158	15.4489	14.9599	14.811	14.7803	14.7995	13.5138	13.4779	13.4678	13.4755
3454	16.2094	16.2044	16.2165	16.1758	16.1233	16.1059	16.1105	16.1022	16.0297	15.9835	16.0143	16.0188	16.1091	16.1827	16.1893	16.1596	16.1788	16.1406	16.1373	16.1312	15.8784	15.8871	15.9283	15.9187	15.4525	15.4392	15.4385	15.3423	14.8682	14.7047	14.6821	14.6678	13.4254	13.4027	13.3991	13.3955
3456	16.0836	16.0642	16.0955	16.0764	15.9812	15.9796	15.9811	16.0054	15.8787	15.8656	15.8863	15.8799	15.9859	16.0461	16.0719	16.0255	16.0263	16.0078	16.0193	15.9969	15.8016	15.7679	15.7962	15.749	15.3429	15.3586	15.3616	15.2474	14.7506	14.604	14.5983	14.5545	13.3056	13.2852	13.2878	13.2659
3458	15.9709	15.931	15.9664	15.971	15.8574	15.85	15.8537	15.9074	15.7404	15.7538	15.7606	15.7428	15.8711	15.9211	15.9524	15.9002	15.8968	15.8828	15.9219	15.8775	15.6799	15.6554	15.6794	15.6244	15.2094	15.2298	15.2114	15.1416	14.6261	14.4769	14.4644	14.4185	13.207	13.17	13.1667	13.1376
3460	15.8561	15.8006	15.8397	15.8275	15.7425	15.7036	15.7184	15.7633	15.6267	15.63	15.6256	15.6063	15.7286	15.7915	15.8152	15.761	15.7249	15.7184	15.7582	15.7314	15.5059	15.516	15.5305	15.4831	15.0971	15.083	15.031	15.0117	14.5285	14.396	14.3532	14.2914	13.1079	13.0908	13.0982	13.0683
3462	15.7146	15.6557	15.6798	15.6466	15.6033	15.547	15.5764	15.5937	15.5045	15.4856	15.4715	15.4632	15.5801	15.6557	15.6511	15.6055	15.5908	15.602	15.6303	15.5839	15.3965	15.4059	15.4131	15.3774	14.991	14.9682	14.921	14.9132	14.4115	14.3037	14.2438	14.2074	13.0088	12.9977	13.0257	12.9942
3464	15.6068	15.5578	15.5674	15.5381	15.4934	15.4572	15.4716	15.476	15.3991	15.3764	15.3548	15.3696	15.4694	15.5552	15.5342	15.504	15.5049	15.5066	15.5238	15.4809	15.2815	15.2838	15.2903	15.2647	14.871	14.8461	14.8057	14.7962	14.3206	14.2139	14.1277	14.1194	12.928	12.9129	12.9288	12.9179
3466	15.4735	15.4467	15.4474	15.4366	15.352	15.3665	15.3512	15.3497	15.2679	15.2529	15.2304	15.2647	15.3471	15.4294	15.4018	15.3939	15.4131	15.4097	15.4141	15.3652	15.1789	15.1714	15.1735	15.1529	14.7527	14.7439	14.7141	14.6928	14.2138	14.0789	14.0246	14.0225	12.8339	12.786	12.7792	12.7936
3468	15.3553	15.331	15.3307	15.3356	15.2339	15.2721	15.2359	15.2468	15.154	15.1406	15.1216	15.1608	15.2366	15.3147	15.286	15.2899	15.2756	15.2685	15.2729	15.2562	15.06	15.0385	15.0579	15.0237	14.5876	14.6181	14.5929	14.5604	14.1138	13.9381	13.9025	13.8799	12.7413	12.6686	12.654	12.6771
3470	15.1948	15.1531	15.1765	15.1791	15.0906	15.1133	15.0777	15.1179	15.0144	14.9821	14.9858	15.0057	15.0774	15.149	15.1307	15.1527	15.0563	15.0874	15.0938	15.1074	14.9286	14.8957	14.927	14.8753	14.4494	14.4903	14.4737	14.4299	13.9663	13.829	13.7909	13.756	12.6055	12.5343	12.5374	12.538
3472	15.0452	14.9906	15.0117	15.0183	14.95	14.9482	14.9241	14.9913	14.8766	14.8351	14.8519	14.8516	14.9337	14.9892	14.9854	15.0094	14.9053	14.9492	14.9493	14.967	14.7542	14.7393	14.7802	14.7201	14.2914	14.3035	14.3127	14.2578	13.8053	13.7046	13.6335	13.6056	12.4665	12.4041	12.4277	12.3985
3474	14.8926	14.8547	14.8491	14.8531	14.7994	14.7702	14.766	14.8295	14.7035	14.6988	14.7004	14.6739	14.7639	14.8252	14.8351	14.8261	14.7694	14.8065	14.7958	14.7942	14.5493	14.5469	14.5853	14.5383	14.1496	14.1216	14.1413	14.0755	13.6474	13.5795	13.505	13.4713	12.3088	12.2781	12.3022	12.2574
3476	14.7285	14.7142	14.6683	14.668	14.6356	14.5877	14.6095	14.6511	14.5179	14.5511	14.5381	14.4956	14.5922	14.6598	14.6712	14.6333	14.6428	14.6742	14.6545	14.6272	14.3916	14.4066	14.4241	14.3946	13.9819	13.9707	13.9974	13.9542	13.4764	13.4207	13.368	13.3348	12.1632	12.146	12.1617	12.1121
3478	14.5686	14.5663	14.5318	14.4951	14.4729	14.4232	14.4655	14.4917	14.3627	14.385	14.3775	14.3461	14.4299	14.5117	14.5177	14.4742	14.4769	14.522	14.4762	14.4671	14.232	14.263	14.2481	14.2362	13.8161	13.8269	13.8471	13.8368	13.355	13.2693	13.2306	13.1955	12.0353	12.0188	12.0424	11.9846
3480	14.3793	14.3809	14.3851	14.2895	14.2875	14.2502	14.2999	14.3124	14.1971	14.1868	14.1929	14.1845	14.2579	14.3458	14.332	14.3051	14.2994	14.3694	14.3018	14.2922	14.084	14.1363	14.102	14.0923	13.6652	13.6953	13.6978	13.6961	13.2273	13.075	13.0746	13.082	11.9093	11.8647	11.9045	11.8316
3482	14.2129	14.2272	14.2392	14.146	14.1322	14.1105	14.147	14.1538	14.0529	14.0307	14.0351	14.0424	14.1116	14.1908	14.1721	14.1487	14.1315	14.194	14.1124	14.1283	13.9145	13.9722	13.9653	13.9133	13.4989	13.5378	13.5153	13.4977	13.1029	12.909	12.8988	12.9429	11.7842	11.7246	11.7724	11.7134
3484	14.0203	14.0459	14.0453	14.0154	13.9614	13.9616	13.9549	13.9717	13.8818	13.8742	13.8513	13.8696	13.9431	14.0104	14	13.9648	13.9554	14.0089	13.9271	13.9391	13.7534	13.7964	13.8248	13.7376	13.3611	13.3883	13.3616	13.3248	12.93	12.7788	12.7492	12.7969	11.6246	11.5563	11.5977	11.5804
3486	13.8555	13.8893	13.8594	13.8833	13.8091	13.8139	13.7837	13.8055	13.7241	13.7218	13.6981	13.7087	13.7889	13.8442	13.8296	13.8007	13.801	13.8351	13.7898	13.7846	13.5976	13.5866	13.6577	13.585	13.2075	13.2041	13.2022	13.1504	12.7758	12.65	12.5787	12.5956	11.4973	11.4288	11.4559	11.473
3488	13.6828	13.7118	13.6811	13.7001	13.6193	13.6033	13.5913	13.6168	13.5266	13.5344	13.5213	13.5203	13.5928	13.6506	13.6129	13.6155	13.6287	13.6452	13.6425	13.6317	13.439	13.3731	13.4539	13.4249	13.0684	13.0397	13.0554	12.9932	12.6488	12.5395	12.4644	12.4384	11.3697	11.3223	11.3387	11.3676
3490	13.5202	13.5383	13.5071	13.5119	13.4438	13.4126	13.4212	13.4475	13.3518	13.3533	13.3617	13.3518	13.4221	13.4712	13.4225	13.4495	13.474	13.4796	13.5046	13.4883	13.2696	13.2494	13.3033	13.2916	12.9035	12.8933	12.9146	12.8508	12.5196	12.4064	12.3505	12.3146	11.2567	11.2276	11.2221	11.2576
3492	13.3756	13.3917	13.3759	13.3631	13.3177	13.2705	13.2875	13.2981	13.2314	13.2014	13.2233	13.2051	13.263	13.3255	13.2986	13.3015	13.3011	13.3149	13.3378	13.3051	13.083	13.1361	13.1489	13.1493	12.7496	12.7524	12.7673	12.7099	12.3837	12.2767	12.2507	12.2034	11.1379	11.1171	11.0964	11.1332
3494	13.2247	13.2391	13.2436	13.2121	13.1853	13.1288	13.1572	13.1464	13.108	13.0552	13.0745	13.0597	13.106	13.1834	13.1816	13.1509	13.1472	13.1662	13.1908	13.1203	12.9313	13.0046	13.0182	13.0126	12.6081	12.5994	12.6249	12.5924	12.2237	12.1224	12.1217	12.0686	11.009	10.9734	10.9521	10.9824
3496	13.0831	13.0984	13.1129	13.069	13.0339	12.9876	13.0295	13.0175	12.9627	12.9168	12.9374	12.9289	12.9667	13.0449	13.0636	13.0252	12.9957	13.0134	13.0254	12.9603	12.7797	12.7947	12.8764	12.8326	12.4621	12.4288	12.4666	12.4493	12.0763	11.9871	11.9736	11.9149	10.8624	10.8555	10.8192	10.8512
3498	12.9184	12.9338	12.9453	12.8963	12.838	12.8048	12.8683	12.8628	12.7718	12.7578	12.7724	12.7665	12.8121	12.8814	12.9161	12.8767	12.8383	12.864	12.8673	12.7964	12.6315	12.6161	12.7311	12.6625	12.2939	12.2799	12.3126	12.3133	11.9132	11.8232	11.8198	11.7918	10.6994	10.6963	10.6551	10.7015
3500	12.7647	12.7797	12.7788	12.74	12.6803	12.6595	12.7077	12.725	12.5991	12.6084	12.6201	12.616	12.6602	12.7249	12.7657	12.723	12.6698	12.7033	12.6939	12.6662	12.4316	12.4625	12.5603	12.4963	12.096	12.1063	12.1355	12.136	11.7686	11.6673	11.6426	11.6468	10.5698	10.5606	10.5299	10.5695
3502	12.5818	12.5977	12.5835	12.5655	12.5162	12.5078	12.4979	12.5575	12.4122	12.4304	12.4341	12.4269	12.469	12.53	12.5574	12.5215	12.4781	12.5346	12.5114	12.5074	12.2523	12.3221	12.3734	12.3346	11.9498	11.9594	11.9825	11.9701	11.6251	11.5424	11.4868	11.5155	10.4396	10.4199	10.402	10.4137
3504	12.4168	12.4282	12.3993	12.4043	12.364	12.3631	12.3212	12.3983	12.2495	12.2701	12.2669	12.2603	12.3121	12.3638	12.3732	12.3454	12.3284	12.3756	12.3642	12.3669	12.1104	12.1631	12.2021	12.1914	11.8107	11.8224	11.8194	11.7968	11.4951	11.4175	11.3243	11.3451	10.3235	10.2907	10.2859	10.2813
3506	12.2584	12.2535	12.2419	12.2414	12.1816	12.1901	12.1621	12.2169	12.0849	12.1176	12.1005	12.1075	12.1407	12.2192	12.2172	12.1875	12.1706	12.1871	12.2	12.1992	11.9712	11.9805	12.0218	12.0401	11.6784	11.687	11.6747	11.6305	11.3703	11.2771	11.2031	11.1965	10.191	10.1599	10.1631	10.1745
3508	12.1037	12.0848	12.082	12.0775	12	12.0157	12.0146	12.0418	11.9305	11.9641	11.9419	11.9623	11.9814	12.0749	12.0685	12.0401	12.0293	12.0404	12.0614	12.0457	11.8275	11.8468	11.8798	11.9005	11.5192	11.5382	11.5398	11.4939	11.2359	11.1022	11.0795	11.0613	10.0602	10.0252	10.0329	10.063
3510	11.9489	11.9398	11.9424	11.9348	11.8513	11.8509	11.8777	11.897	11.7847	11.7974	11.8056	11.8183	11.8308	11.9038	11.9175	11.8948	11.8775	11.8984	11.8952	11.8907	11.6512	11.7061	11.735	11.7429	11.3671	11.3815	11.3906	11.355	11.0847	10.9684	10.9577	10.929	9.9244	9.88381	9.90807	9.92015
3512	11.7804	11.7847	11.7915	11.7763	11.6973	11.6763	11.731	11.7432	11.6208	11.6109	11.6663	11.662	11.6749	11.7133	11.75	11.7395	11.7255	11.7562	11.7481	11.7339	11.4984	11.5597	11.6093	11.5866	11.2128	11.2138	11.2443	11.2138	10.9025	10.8416	10.8083	10.7873	9.78734	9.72905	9.76746	9.7507
3514	11.6308	11.6473	11.6475	11.6279	11.5537	11.5366	11.5812	11.5864	11.471	11.4472	11.5207	11.5003	11.5366	11.5635	11.5983	11.5926	11.5602	11.5811	11.6142	11.5951	11.3308	11.3708	11.4458	11.4107	11.0522	11.024	11.073	11.0384	10.7661	10.7171	10.6546	10.6259	9.65202	9.6155	9.64276	9.62496
3516	11.4634	11.4946	11.4766	11.4536	11.3896	11.3957	11.3998	11.4009	11.2922	11.2742	11.3415	11.313	11.3862	11.4083	11.4301	11.4196	11.3877	11.4127	11.4791	11.4439	11.1906	11.2003	11.2802	11.2448	10.912	10.8697	10.9262	10.8808	10.6369	10.5443	10.5276	10.4932	9.5096	9.49614	9.50049	9.49504
3518	11.3129	11.3436	11.3231	11.3159	11.2476	11.2559	11.2547	11.2515	11.1431	11.1366	11.1949	11.1605	11.237	11.2722	11.2773	11.2739	11.2254	11.2754	11.309	11.2956	11.0603	11.0402	11.1131	11.0854	10.7531	10.7152	10.7689	10.7056	10.5159	10.3712	10.3974	10.3533	9.39274	9.38743	9.37746	9.37906
3520	11.1525	11.1545	11.1641	11.1798	11.0907	11.084	11.1137	11.108	10.983	10.9949	11.0453	11.0188	11.0667	11.1187	11.1135	11.1224	11.0533	11.1335	11.1237	11.1183	10.9251	10.895	10.9412	10.9306	10.6094	10.5915	10.6349	10.5648	10.3736	10.2456	10.267	10.2419	9.26499	9.25621	9.24429	9.25339
3522	11.0068	10.9947	11.0145	11.0448	10.9433	10.9363	10.9754	10.9796	10.8456	10.8649	10.9026	10.8886	10.9194	10.9747	10.969	10.9817	10.903	10.9856	10.9878	10.9622	10.7575	10.7684	10.8016	10.7868	10.4456	10.4543	10.4887	10.4474	10.2396	10.1314	10.1163	10.1145	9.16281	9.13345	9.12378	9.13962
3524	10.8442	10.8648	10.881	10.8849	10.7938	10.7856	10.8019	10.8411	10.7166	10.7124	10.7327	10.7357	10.7682	10.824	10.8402	10.8232	10.7396	10.8197	10.8483	10.8057	10.5888	10.6392	10.6536	10.6372	10.3105	10.3319	10.348	10.3312	10.1276	10.0359	9.99109	9.99968	9.05581	9.0108	9.01762	9.02611
3526	10.6888	10.7401	10.7398	10.7166	10.6458	10.6434	10.6377	10.7014	10.5865	10.5627	10.5752	10.5899	10.6265	10.6823	10.7151	10.6753	10.6081	10.6857	10.7172	10.669	10.4654	10.5271	10.5327	10.5185	10.1809	10.2176	10.2299	10.2087	10.0149	9.92059	9.87011	9.88119	8.95008	8.88387	8.90866	8.90601
3528	10.5747	10.611	10.6124	10.588	10.5084	10.5258	10.5217	10.5639	10.4534	10.4453	10.4639	10.4707	10.4912	10.5622	10.5717	10.5574	10.4871	10.5413	10.5557	10.5375	10.341	10.3986	10.4132	10.4019	10.065	10.0926	10.1061	10.0702	9.89182	9.80488	9.75736	9.76028	8.81979	8.75532	8.78581	8.77103
3530	10.4532	10.4562	10.4668	10.4555	10.3651	10.394	10.4056	10.4159	10.3095	10.3202	10.3512	10.3436	10.3519	10.4364	10.4064	10.4333	10.3708	10.4087	10.403	10.4057	10.2133	10.2728	10.2891	10.2817	9.945	9.9479	9.96284	9.93741	9.74606	9.63759	9.61322	9.63404	8.68343	8.61699	8.64743	8.61819
3532	10.3295	10.3276	10.3316	10.3267	10.2332	10.2565	10.2654	10.2838	10.1752	10.1875	10.2221	10.2105	10.2124	10.2928	10.2753	10.3008	10.2252	10.2584	10.2372	10.2799	10.0502	10.1146	10.1246	10.1136	9.80873	9.78196	9.80053	9.78312	9.62578	9.50061	9.46934	9.49352	8.56843	8.51551	8.5358	8.50962
3534	10.1691	10.1826	10.1715	10.1695	10.0805	10.0879	10.0783	10.1309	10.0258	10.0191	10.0486	10.0449	10.0552	10.1115	10.1289	10.1366	10.0692	10.1194	10.092	10.1391	9.90839	9.96417	9.97034	9.95907	9.67163	9.65698	9.67492	9.65176	9.50606	9.39559	9.35941	9.37543	8.44611	8.41394	8.42401	8.39178
3536	10.0316	10.0577	10.0348	10.0351	9.96449	9.9559	9.94672	10.0094	9.90169	9.88955	9.91063	9.91005	9.92444	9.979	10.0096	10.0043	9.94118	9.99429	9.97815	10.0097	9.77148	9.81921	9.84755	9.82988	9.51876	9.54187	9.55163	9.51334	9.39523	9.2972	9.24404	9.24407	8.34036	8.31859	8.3164	8.30654
3538	9.88759	9.91576	9.90326	9.89099	9.83626	9.83066	9.82754	9.88642	9.77408	9.7651	9.77059	9.76933	9.77839	9.86521	9.86899	9.86591	9.80652	9.85722	9.86557	9.86367	9.65	9.68397	9.73091	9.70687	9.39022	9.42226	9.43672	9.38993	9.2683	9.17852	9.14639	9.13298	8.2233	8.19838	8.17637	8.20463
3540	9.76078	9.78493	9.77751	9.76782	9.72191	9.72004	9.7202	9.77546	9.65173	9.65308	9.65707	9.64806	9.66749	9.75885	9.74416	9.74941	9.69218	9.74096	9.75672	9.73466	9.52591	9.56488	9.60833	9.58977	9.25903	9.27158	9.30744	9.2596	9.14322	9.04068	9.03142	9.00527	8.11137	8.08575	8.0508	8.10688
3542	9.64193	9.6445	9.66061	9.66122	9.59039	9.59793	9.58485	9.65036	9.50462	9.51971	9.54886	9.52294	9.5625	9.62873	9.62391	9.63135	9.55498	9.60704	9.62849	9.60838	9.39633	9.44619	9.4615	9.45492	9.14309	9.14109	9.17897	9.12884	9.00373	8.92067	8.92006	8.89122	7.97716	7.95832	7.94338	7.98539
3544	9.52238	9.50418	9.5345	9.55083	9.45155	9.47335	9.44707	9.51674	9.35958	9.38209	9.43767	9.40199	9.45478	9.49084	9.49914	9.51088	9.4218	9.48301	9.51313	9.48423	9.27114	9.32397	9.33741	9.33224	9.00889	9.01727	9.03384	9.00012	8.8646	8.79305	8.78255	8.78402	7.85888	7.84049	7.8419	7.85439
3546	9.38561	9.39017	9.39937	9.43063	9.32611	9.33526	9.32495	9.37383	9.22913	9.25109	9.29407	9.27723	9.30332	9.34039	9.36105	9.36872	9.26211	9.33292	9.36016	9.32555	9.12067	9.17827	9.19813	9.19067	8.88184	8.88932	8.88481	8.86316	8.76764	8.6882	8.66807	8.67904	7.75304	7.7493	7.74196	7.74866
3548	9.23397	9.27135	9.22736	9.27745	9.18963	9.17904	9.19711	9.22239	9.09738	9.11256	9.12994	9.14123	9.14144	9.18308	9.20569	9.20677	9.1269	9.20315	9.23113	9.16813	9.01334	9.05323	9.07704	9.07538	8.75417	8.77481	8.78293	8.74728	8.67448	8.57098	8.56825	8.57261	7.65043	7.64097	7.6289	7.6378
3550	9.12538	9.15888	9.10729	9.15348	9.06944	9.06625	9.07871	9.10146	8.98911	9.00321	9.02194	9.02706	9.02742	9.07876	9.08903	9.0864	9.02427	9.07765	9.10904	9.05057	8.90781	8.90861	8.94425	8.96021	8.62429	8.64732	8.68314	8.6184	8.57724	8.47039	8.4643	8.45557	7.55048	7.53528	7.51922	7.53364
3552	9.0158	9.02526	8.99179	9.02077	8.93445	8.94998	8.94104	8.97753	8.86886	8.88718	8.91636	8.90246	8.91414	8.97803	8.97792	8.96373	8.92388	8.95452	8.98637	8.93739	8.80133	8.7896	8.82425	8.85024	8.50057	8.53443	8.56908	8.5167	8.4553	8.36534	8.33885	8.33873	7.44413	7.39398	7.3927	7.40997
3554	8.90187	8.89819	8.88837	8.90022	8.81987	8.83891	8.82521	8.87426	8.75483	8.77626	8.81413	8.79534	8.80085	8.87609	8.86775	8.85786	8.7954	8.82506	8.85341	8.83664	8.64098	8.67948	8.70195	8.7236	8.36282	8.40171	8.41587	8.40728	8.34509	8.25488	8.19915	8.20593	7.34033	7.29173	7.28942	7.30786
3556	8.74836	8.74547	8.7606	8.76297	8.68482	8.69955	8.69753	8.75288	8.614	8.63709	8.68117	8.66932	8.65361	8.72638	8.73062	8.73795	8.64236	8.69249	8.72167	8.71044	8.49615	8.56822	8.57861	8.59212	8.26291	8.29178	8.28188	8.29819	8.22236	8.13233	8.09808	8.08941	7.21886	7.19935	7.18866	7.20836
3558	8.62102	8.61873	8.63854	8.64041	8.56417	8.57495	8.58937	8.64487	8.49382	8.5161	8.55948	8.55244	8.53148	8.60264	8.60655	8.62558	8.52781	8.58076	8.61329	8.5947	8.37741	8.45169	8.4731	8.46519	8.16197	8.17689	8.15294	8.16989	8.10994	8.00756	7.99401	7.96461	7.10898	7.10625	7.09996	7.10588
3560	8.51443	8.49772	8.51913	8.52179	8.44835	8.44386	8.4736	8.51711	8.38123	8.39995	8.43239	8.4127	8.41586	8.4881	8.48535	8.49685	8.40863	8.46379	8.49902	8.44753	8.26858	8.32512	8.35735	8.33332	8.06939	8.07099	8.03763	8.04761	7.99718	7.89736	7.89195	7.8609	6.98963	6.97414	6.99531	6.97434
3562	8.41311	8.38626	8.39252	8.40777	8.33907	8.32456	8.36054	8.392	8.2756	8.2899	8.30728	8.28464	8.30854	8.37412	8.36811	8.37606	8.30132	8.35826	8.38339	8.32439	8.16395	8.18925	8.2479	8.22365	7.94397	7.94466	7.92237	7.94067	7.88855	7.78227	7.76355	7.75887	6.90054	6.85687	6.89165	6.85171
3564	8.29646	8.28571	8.28266	8.29665	8.21479	8.2087	8.23547	8.2687	8.15414	8.16759	8.16685	8.16525	8.18274	8.2408	8.24782	8.25459	8.16646	8.22537	8.2388	8.22028	8.04399	8.03452	8.10535	8.10298	7.82702	7.82697	7.8099	7.83442	7.78906	7.69096	7.65647	7.66496	6.83124	6.77957	6.78782	6.76108
3566	8.16859	8.17942	8.16244	8.17192	8.08492	8.09302	8.1064	8.14601	8.02789	8.04043	8.02863	8.05011	8.06531	8.10205	8.12802	8.13578	8.05206	8.12175	8.12531	8.12261	7.93642	7.93462	7.99659	8.00973	7.69803	7.72705	7.70668	7.73251	7.68381	7.60044	7.55211	7.57416	6.75869	6.70155	6.67492	6.67764
3568	8.06706	8.08211	8.06981	8.0685	7.99396	8.00073	8.00783	8.05374	7.93854	7.94985	7.93935	7.96645	7.97812	7.99403	8.03607	8.04165	7.95092	8.02175	8.03328	8.02129	7.80981	7.85447	7.90777	7.91641	7.57913	7.6189	7.60074	7.62182	7.59326	7.51573	7.45667	7.48177	6.65479	6.61776	6.5849	6.59335
3570	7.96324	7.96982	7.9663	7.95823	7.89904	7.9014	7.90372	7.95708	7.84553	7.85413	7.8558	7.87749	7.88626	7.88672	7.94159	7.93755	7.85383	7.92401	7.93684	7.91408	7.7174	7.77162	7.81084	7.82556	7.48998	7.51566	7.51168	7.51983	7.48493	7.40685	7.36358	7.38365	6.5329	6.51022	6.48653	6.49159
3572	7.85257	7.86946	7.86941	7.86519	7.80725	7.81063	7.81201	7.85526	7.74913	7.76069	7.76827	7.78334	7.78422	7.79604	7.84075	7.84505	7.7423	7.80335	7.80543	7.81839	7.62148	7.65705	7.66807	7.70912	7.39702	7.39888	7.40702	7.40894	7.38834	7.30485	7.26615	7.26694	6.41931	6.41268	6.39686	6.40444
3574	7.71097	7.75181	7.75166	7.758	7.68023	7.69027	7.69529	7.72209	7.61886	7.63879	7.6535	7.65347	7.64048	7.69492	7.70688	7.73397	7.61973	7.68174	7.67323	7.70439	7.52444	7.54324	7.53444	7.58652	7.29409	7.28842	7.31003	7.3006	7.26355	7.18977	7.16807	7.17419	6.30104	6.29542	6.28606	6.30501
3576	7.59931	7.64335	7.64372	7.64632	7.5724	7.58539	7.5924	7.61569	7.5045	7.52922	7.5512	7.54249	7.5228	7.5956	7.59371	7.62979	7.51878	7.56592	7.56939	7.60355	7.3997	7.42978	7.42839	7.45585	7.16232	7.16172	7.18703	7.15702	7.15933	7.08183	7.05504	7.0652	6.21202	6.19541	6.18776	6.21509
3578	7.48634	7.51009	7.52978	7.50199	7.45569	7.46552	7.47392	7.51498	7.38078	7.41049	7.42858	7.42761	7.39322	7.47336	7.47696	7.50425	7.41068	7.44047	7.46866	7.48928	7.28078	7.31643	7.31957	7.32571	7.05376	7.07013	7.07613	7.0393	7.06543	6.99603	6.96885	6.96789	6.12599	6.09933	6.08365	6.11161
3580	7.38792	7.39009	7.41929	7.37595	7.34991	7.35855	7.36872	7.41764	7.27565	7.30474	7.32291	7.32404	7.29395	7.36523	7.37592	7.39458	7.31587	7.33198	7.37696	7.38556	7.17577	7.21493	7.21366	7.22903	6.94394	6.97302	6.97134	6.94517	6.97602	6.90953	6.88142	6.85663	6.04412	6.01232	5.99149	6.01483
3582	7.29629	7.29423	7.31927	7.28285	7.25047	7.25528	7.26962	7.30473	7.18609	7.20473	7.23054	7.21569	7.21024	7.26432	7.28084	7.29156	7.19989	7.22177	7.27084	7.27486	7.07037	7.1113	7.08909	7.13513	6.84884	6.88418	6.87464	6.85546	6.87463	6.81874	6.78681	6.75894	5.95086	5.90471	5.90604	5.921
3584	7.2023	7.20117	7.20888	7.19469	7.15068	7.15637	7.17449	7.19283	7.09585	7.10864	7.13492	7.1119	7.12803	7.1671	7.18376	7.18944	7.09647	7.12868	7.17442	7.16583	6.97352	7.00575	6.99925	7.03645	6.75009	6.78034	6.77294	6.76554	6.7689	6.71559	6.65567	6.65766	5.85974	5.80015	5.82117	5.83182
3586	7.09851	7.09538	7.10914	7.10662	7.0505	7.06035	7.07623	7.09279	6.98654	7.01347	7.02264	7.01097	7.0235	7.06292	7.07781	7.08048	6.97381	7.03043	7.06015	7.04338	6.86209	6.87987	6.91155	6.90853	6.66107	6.67387	6.66208	6.66268	6.68129	6.61898	6.55291	6.56651	5.75889	5.71556	5.73893	5.74171
3588	6.98413	6.97617	6.99721	6.99619	6.94266	6.95287	6.96649	6.98943	6.86338	6.90346	6.90071	6.9039	6.90877	6.94753	6.95526	6.96532	6.86835	6.94414	6.95759	6.92628	6.76288	6.77893	6.82414	6.81288	6.56772	6.5799	6.55443	6.56972	6.58636	6.51476	6.47299	6.49651	5.65941	5.62607	5.64909	5.64244
3590	6.89007	6.88436	6.9025	6.90116	6.84537	6.85013	6.8649	6.88992	6.76508	6.79644	6.80233	6.81205	6.80326	6.84825	6.8561	6.86972	6.77126	6.83847	6.85014	6.83383	6.65137	6.68131	6.7036	6.72427	6.4679	6.4729	6.43951	6.46833	6.49605	6.42145	6.39592	6.42198	5.57102	5.54778	5.56181	5.56239
3592	6.78425	6.78464	6.79698	6.78463	6.73356	6.73238	6.74577	6.77684	6.66743	6.67136	6.70169	6.7046	6.68671	6.73984	6.74842	6.76652	6.67159	6.74003	6.74425	6.7389	6.56122	6.58574	6.60246	6.64073	6.36034	6.37572	6.35484	6.37353	6.37798	6.32203	6.30469	6.33296	5.48101	5.45625	5.46144	5.4769
3594	6.6922	6.69153	6.70261	6.68876	6.63711	6.62819	6.64429	6.67854	6.57917	6.57245	6.61715	6.61132	6.58418	6.64361	6.65208	6.6646	6.56753	6.63764	6.63322	6.64428	6.45162	6.46565	6.51793	6.52507	6.23897	6.26865	6.27358	6.25844	6.28888	6.22594	6.20526	6.21883	5.3789	5.37354	5.36601	5.39372
3596	6.58564	6.56987	6.59912	6.58374	6.52902	6.51882	6.53969	6.56964	6.47598	6.47883	6.5191	6.50307	6.47504	6.53436	6.54126	6.5392	6.45237	6.52686	6.52546	6.53275	6.35453	6.35699	6.43347	6.40988	6.14047	6.1718	6.18788	6.15705	6.20476	6.12628	6.12567	6.12035	5.26479	5.27429	5.25675	5.28921
3598	6.48514	6.46616	6.49814	6.48868	6.43554	6.42571	6.44946	6.47332	6.38262	6.39144	6.42541	6.40694	6.38182	6.44131	6.44959	6.43774	6.36014	6.42244	6.43663	6.42762	6.25244	6.26695	6.32692	6.30846	6.04073	6.06294	6.06689	6.05251	6.12117	6.02783	6.03915	6.0191	5.18328	5.1903	5.17133	5.19631
3600	6.37238	6.36607	6.39541	6.38217	6.33633	6.33009	6.35538	6.36868	6.27262	6.28588	6.31227	6.30736	6.27854	6.34244	6.3534	6.34057	6.26649	6.31195	6.34198	6.30998	6.15137	6.17872	6.19862	6.20476	5.95597	5.96789	5.96483	5.96061	6.00989	5.93801	5.95443	5.93417	5.11106	5.0936	5.09377	5.10554
3602	6.27069	6.27495	6.29157	6.28301	6.23991	6.23774	6.26515	6.27133	6.17317	6.18634	6.20944	6.21341	6.18796	6.24873	6.26325	6.25124	6.18212	6.21587	6.24807	6.22796	6.0588	6.09007	6.09638	6.11424	5.86048	5.86121	5.88108	5.87103	5.90866	5.84742	5.85425	5.83978	5.03842	5.01148	5.02252	5.02132
3604	6.18007	6.18598	6.19015	6.19101	6.13421	6.13384	6.15717	6.17058	6.07828	6.09185	6.12079	6.10844	6.08464	6.14598	6.16481	6.14769	6.07738	6.11155	6.13986	6.15012	5.96472	5.99268	5.99201	6.0167	5.77378	5.7618	5.80103	5.7794	5.83548	5.76659	5.76084	5.75219	4.94329	4.94538	4.93427	4.9266
3606	6.08875	6.09362	6.08533	6.0917	6.0262	6.02877	6.04458	6.07037	5.98067	5.99508	6.03181	6.00727	5.98718	6.04236	6.06038	6.04281	5.98076	6.02416	6.04395	6.07317	5.87309	5.90481	5.90462	5.93097	5.68116	5.66231	5.70177	5.68485	5.76128	5.67319	5.66149	5.66123	4.85918	4.87316	4.84117	4.83167
3608	5.9888	6.00192	5.9928	5.99509	5.93146	5.93051	5.94459	5.97551	5.88386	5.89627	5.9291	5.91375	5.89543	5.94202	5.96304	5.94507	5.86513	5.93283	5.94363	5.96866	5.76626	5.80372	5.80413	5.83668	5.5839	5.56617	5.58907	5.58033	5.66992	5.58761	5.5741	5.57266	4.77625	4.77353	4.75501	4.74425
3610	5.87474	5.899	5.88851	5.8869	5.83173	5.82915	5.84552	5.87616	5.78197	5.79165	5.81223	5.8134	5.80127	5.83707	5.85704	5.84596	5.75613	5.8399	5.84648	5.85339	5.66342	5.70285	5.72188	5.74288	5.45447	5.46805	5.49074	5.48387	5.55831	5.48994	5.48337	5.48182	4.69533	4.66107	4.66453	4.65745
3612	5.76942	5.7951	5.79026	5.79212	5.72707	5.73329	5.7543	5.77898	5.68917	5.68938	5.70153	5.71347	5.70323	5.73811	5.75262	5.75369	5.64917	5.71744	5.72898	5.75257	5.54626	5.58657	5.63457	5.62467	5.33107	5.36047	5.3903	5.37736	5.47478	5.40505	5.39695	5.38592	4.61099	4.58774	4.58746	4.5948
3614	5.65735	5.67259	5.67377	5.68582	5.60785	5.6255	5.65493	5.66835	5.58834	5.57598	5.58436	5.59405	5.59009	5.62408	5.63544	5.64639	5.54564	5.60229	5.62086	5.6444	5.44183	5.48303	5.54434	5.52032	5.25616	5.27529	5.29897	5.28667	5.39181	5.30741	5.31238	5.2995	4.52386	4.51927	4.50469	4.52668
3616	5.56711	5.57823	5.57853	5.58998	5.5111	5.54057	5.55901	5.5738	5.49463	5.48462	5.49228	5.49961	5.49708	5.53628	5.5416	5.55703	5.45526	5.50577	5.52396	5.53469	5.33937	5.37582	5.43033	5.41748	5.18832	5.18803	5.19292	5.1854	5.3101	5.22291	5.22388	5.20783	4.44625	4.45	4.43192	4.45403
3618	5.47684	5.48718	5.48237	5.48114	5.41761	5.45039	5.44675	5.47553	5.39086	5.3902	5.40283	5.40139	5.39567	5.44812	5.45306	5.4571	5.3698	5.41588	5.43198	5.41397	5.25168	5.28103	5.3229	5.32324	5.10788	5.10838	5.10142	5.10582	5.20793	5.14887	5.14259	5.13628	4.36259	4.3559	4.35436	4.36025
3620	5.39593	5.39846	5.39365	5.38789	5.33456	5.36566	5.35329	5.39076	5.29843	5.30913	5.32896	5.32178	5.31678	5.36766	5.36914	5.37377	5.28961	5.33492	5.33847	5.32456	5.17149	5.19088	5.2338	5.2366	5.00195	5.02372	5.01012	5.01548	5.1189	5.07246	5.05345	5.06073	4.29297	4.27672	4.27982	4.27954
3622	5.30282	5.29216	5.3034	5.29769	5.24346	5.27107	5.26237	5.29862	5.20717	5.2191	5.24158	5.23684	5.22824	5.26863	5.27	5.28106	5.19755	5.25211	5.23552	5.24551	5.09116	5.1003	5.14177	5.15008	4.90999	4.94305	4.92951	4.93407	5.03431	4.97586	4.97051	4.98201	4.21078	4.19552	4.19014	4.20259
3624	5.20983	5.19682	5.21006	5.21124	5.15733	5.17602	5.17562	5.2098	5.11839	5.1343	5.15616	5.15232	5.14027	5.17594	5.17462	5.18847	5.11142	5.15742	5.15125	5.17163	4.99694	5.005	5.05039	5.06243	4.81372	4.83766	4.84232	4.84325	4.9557	4.87096	4.87322	4.87684	4.14113	4.12473	4.11415	4.13388
3626	5.10979	5.10825	5.10899	5.10991	5.05796	5.06338	5.07157	5.10777	5.01399	5.03395	5.05351	5.04533	5.03243	5.07938	5.07125	5.07628	5.00406	5.04519	5.05883	5.07063	4.89766	4.90326	4.94844	4.96418	4.72953	4.74162	4.75816	4.75185	4.87375	4.79602	4.79158	4.79358	4.05935	4.05082	4.04614	4.05552
3628	5.00962	5.01966	5.00531	5.00611	4.95988	4.9585	4.97259	5.00784	4.91403	4.93347	4.94852	4.94483	4.93442	4.98515	4.97197	4.97063	4.91128	4.94878	4.97185	4.97617	4.80415	4.82402	4.86384	4.8741	4.63906	4.65075	4.66914	4.66305	4.79356	4.72478	4.70218	4.71968	3.9869	3.97762	3.98067	3.98099
3630	4.91356	4.92169	4.92566	4.92011	4.87241	4.87104	4.88692	4.91644	4.83247	4.84308	4.85406	4.86208	4.84918	4.89472	4.88075	4.88412	4.81109	4.85306	4.8768	4.88027	4.70769	4.74716	4.77862	4.77221	4.55665	4.56373	4.57973	4.57044	4.71442	4.66094	4.62547	4.65322	3.91241	3.89874	3.90718	3.91674
3632	4.81628	4.81478	4.84593	4.83162	4.78058	4.78693	4.80174	4.82343	4.75192	4.74906	4.76276	4.77889	4.76581	4.80188	4.78545	4.79883	4.7224	4.76318	4.78892	4.78791	4.62038	4.66738	4.69583	4.69036	4.47145	4.47999	4.49367	4.48705	4.63202	4.58028	4.54571	4.57445	3.84493	3.81827	3.82772	3.85046
3634	4.72419	4.72532	4.761	4.74232	4.68656	4.70282	4.7146	4.73183	4.6586	4.65436	4.67739	4.68638	4.67528	4.70843	4.69519	4.70758	4.63681	4.67263	4.68927	4.69871	4.53017	4.5695	4.59969	4.60433	4.38709	4.39744	4.40198	4.40029	4.5617	4.50223	4.4755	4.48986	3.77114	3.75255	3.75654	3.77638
3636	4.62705	4.62814	4.651	4.63911	4.58266	4.60558	4.61666	4.63296	4.55199	4.55134	4.58629	4.57911	4.57445	4.60647	4.59913	4.60667	4.55749	4.59073	4.59571	4.60605	4.44863	4.48407	4.51274	4.52213	4.30223	4.31723	4.32089	4.32754	4.48278	4.40396	4.4012	4.41438	3.69849	3.68238	3.68223	3.69155
3638	4.53218	4.5436	4.55846	4.54742	4.49423	4.51844	4.52535	4.54815	4.46607	4.47151	4.49821	4.48856	4.48247	4.519	4.51462	4.52562	4.47685	4.51074	4.49949	4.51762	4.35976	4.39733	4.42462	4.42565	4.21708	4.22935	4.23319	4.24778	4.4107	4.32569	4.32539	4.33455	3.63755	3.61756	3.61699	3.62619
3640	4.4226	4.44894	4.46399	4.44938	4.40122	4.4236	4.4231	4.46358	4.38022	4.38834	4.39959	4.39701	4.38476	4.42275	4.42251	4.44579	4.38912	4.43113	4.40833	4.42276	4.28245	4.31121	4.33769	4.33677	4.14047	4.15111	4.15824	4.16573	4.32782	4.2614	4.24406	4.26203	3.57448	3.54805	3.54426	3.55692
3642	4.34106	4.36449	4.37712	4.35984	4.31894	4.33428	4.33558	4.37807	4.29809	4.3104	4.31366	4.31414	4.29573	4.33638	4.33938	4.36165	4.29557	4.3403	4.32111	4.33543	4.19979	4.20323	4.23821	4.24789	4.05896	4.06093	4.07732	4.05817	4.25292	4.19464	4.15391	4.18099	3.51423	3.4879	3.48578	3.49388
3644	4.26495	4.27093	4.28374	4.2616	4.22343	4.23755	4.24929	4.27707	4.20142	4.21411	4.22188	4.22222	4.20059	4.24265	4.24648	4.25554	4.19154	4.24037	4.23308	4.24412	4.11762	4.1071	4.13898	4.15941	3.97762	3.97887	4.00131	3.97125	4.17612	4.11496	4.09177	4.11119	3.44218	3.42355	3.42715	3.41944
3646	4.1855	4.18421	4.19205	4.17195	4.14031	4.14675	4.16105	4.18016	4.10949	4.12356	4.13597	4.13826	4.11375	4.1552	4.15916	4.15931	4.09898	4.1395	4.15282	4.15421	4.01793	4.03242	4.04904	4.0717	3.88607	3.88959	3.9169	3.89218	4.1037	4.03476	4.0293	4.03469	3.3704	3.36507	3.36827	3.35252
3648	4.07354	4.08772	4.09784	4.08592	4.05743	4.05401	4.05707	4.07727	4.01199	4.0281	4.03967	4.04832	4.02282	4.06345	4.06197	4.06099	3.99846	4.032	4.06222	4.05093	3.91975	3.95587	3.95633	3.97854	3.80028	3.81085	3.83485	3.81875	4.02224	3.95397	3.95703	3.95883	3.29114	3.3023	3.29141	3.2796
3650	3.9673	3.99071	4.00084	3.99963	3.96926	3.96254	3.9601	3.98239	3.91695	3.9344	3.94726	3.95582	3.93634	3.97417	3.96626	3.96731	3.90744	3.93366	3.96166	3.95761	3.83312	3.86276	3.87868	3.88462	3.70916	3.72256	3.73733	3.73092	3.94802	3.86914	3.85765	3.8733	3.22514	3.23625	3.21781	3.21505
3652	3.87961	3.88976	3.89786	3.90374	3.8626	3.86214	3.86833	3.88943	3.81733	3.83504	3.85172	3.84575	3.83876	3.87799	3.86675	3.87245	3.81557	3.83309	3.84598	3.86613	3.74686	3.75699	3.79379	3.7829	3.62754	3.64045	3.64381	3.64481	3.87501	3.80925	3.78808	3.79286	3.15665	3.15617	3.14482	3.15419
3654	3.79633	3.78932	3.79029	3.80255	3.75594	3.76409	3.77747	3.80024	3.72003	3.73705	3.75751	3.7406	3.74544	3.78019	3.768	3.77989	3.73008	3.74695	3.7566	3.77792	3.66065	3.66951	3.71031	3.69897	3.54535	3.55753	3.55763	3.56213	3.80107	3.75328	3.73154	3.71294	3.09327	3.07866	3.07665	3.09338
3656	3.71114	3.70451	3.70178	3.70397	3.66618	3.67394	3.6833	3.71418	3.63125	3.65068	3.66589	3.65669	3.65654	3.68171	3.67947	3.68624	3.63956	3.65996	3.67223	3.68461	3.56935	3.58496	3.61252	3.61518	3.4627	3.47284	3.47189	3.47151	3.72502	3.67462	3.66727	3.63424	3.01919	3.01133	3.00851	3.02431
3658	3.61758	3.61886	3.61048	3.59955	3.57703	3.58172	3.58442	3.62261	3.54078	3.56297	3.56961	3.57237	3.56485	3.58305	3.58831	3.58715	3.54686	3.57589	3.58543	3.58701	3.47872	3.49879	3.51978	3.52896	3.36681	3.38231	3.38541	3.38053	3.64151	3.56462	3.56789	3.54925	2.95177	2.9454	2.94056	2.95168
3660	3.51201	3.51259	3.51211	3.49747	3.47657	3.47847	3.4852	3.52142	3.44156	3.45847	3.47003	3.4705	3.46415	3.48945	3.48735	3.48725	3.44399	3.4804	3.47365	3.47856	3.38082	3.40123	3.42254	3.42577	3.27207	3.2871	3.2937	3.28279	3.56617	3.48024	3.47543	3.46613	2.89199	2.8803	2.88026	2.88736
3662	3.39287	3.38848	3.39621	3.38994	3.36439	3.36266	3.38081	3.41008	3.3343	3.33977	3.36225	3.35479	3.35701	3.38797	3.37591	3.38265	3.34212	3.38512	3.36814	3.36746	3.28712	3.3077	3.33	3.32922	3.18237	3.20303	3.20446	3.19893	3.48563	3.4118	3.39929	3.39504	2.83137	2.81365	2.81502	2.82015
3664	3.28684	3.28745	3.29217	3.29185	3.26615	3.26849	3.28019	3.30783	3.23876	3.24112	3.26272	3.25727	3.25836	3.28375	3.27392	3.28336	3.24146	3.2752	3.27143	3.26777	3.18969	3.20621	3.23394	3.23291	3.09445	3.12117	3.10974	3.11634	3.4052	3.34489	3.32706	3.3264	2.76339	2.75508	2.75263	2.76186
3666	3.17893	3.19238	3.19241	3.19103	3.16689	3.17801	3.17592	3.20153	3.14417	3.14558	3.16026	3.16316	3.15822	3.17143	3.1701	3.1798	3.14189	3.16777	3.17807	3.16857	3.0997	3.11022	3.13792	3.13891	3.00534	3.03203	3.02418	3.03208	3.31738	3.26232	3.25666	3.25785	2.68996	2.69221	2.68237	2.69808
3668	3.08576	3.09796	3.09799	3.09338	3.06967	3.08323	3.08161	3.10614	3.04905	3.05073	3.06083	3.07391	3.06129	3.07192	3.07516	3.08548	3.04797	3.07078	3.08363	3.07464	3.00719	3.0134	3.03679	3.03781	2.90954	2.92801	2.93685	2.93776	3.23698	3.18199	3.18374	3.17916	2.62533	2.62474	2.6228	2.6292
3670	2.99496	2.99224	2.99745	2.99085	2.96081	2.97512	2.98584	3.00593	2.94687	2.94507	2.95631	2.98088	2.96158	2.97514	2.98134	2.98999	2.95404	2.97642	2.98905	2.97702	2.91673	2.9207	2.93919	2.94168	2.82248	2.83916	2.8502	2.84409	3.15753	3.10023	3.0983	3.10067	2.55947	2.54026	2.56174	2.544
3672	2.9047	2.89449	2.90104	2.89649	2.86347	2.87918	2.89441	2.91101	2.85408	2.85079	2.86351	2.88413	2.86632	2.88245	2.88967	2.89803	2.85715	2.87904	2.89626	2.88197	2.8175	2.82063	2.84564	2.85225	2.73131	2.75353	2.75076	2.74337	3.08098	3.02428	3.00222	3.01051	2.49005	2.4676	2.49658	2.47077
3674	2.80454	2.80083	2.80502	2.80436	2.77548	2.7874	2.79689	2.8111	2.7637	2.76073	2.77676	2.77257	2.76658	2.78548	2.79177	2.79924	2.75593	2.77911	2.80023	2.77863	2.71895	2.7255	2.75115	2.76261	2.65068	2.67068	2.66136	2.6535	3.00022	2.95026	2.92724	2.93428	2.40749	2.39731	2.41542	2.39702
3676	2.70841	2.70992	2.71063	2.71341	2.68962	2.69736	2.70337	2.71621	2.67287	2.67533	2.68951	2.67325	2.67344	2.6926	2.69956	2.70304	2.66697	2.69039	2.70026	2.68458	2.62451	2.64276	2.66131	2.66987	2.57142	2.58139	2.57684	2.57277	2.92395	2.87529	2.85733	2.86315	2.34325	2.33421	2.34179	2.3325
3678	2.61017	2.61366	2.61636	2.61334	2.59293	2.59503	2.60361	2.6227	2.57089	2.58658	2.59133	2.58436	2.58059	2.5982	2.60962	2.6022	2.57731	2.60419	2.59534	2.59465	2.53469	2.56015	2.5709	2.57496	2.49016	2.49462	2.49639	2.49538	2.84744	2.80058	2.78501	2.79274	2.28778	2.27363	2.27626	2.27123
3680	2.52066	2.52169	2.52456	2.51855	2.4996	2.50139	2.51154	2.534	2.47961	2.49971	2.49968	2.50121	2.49546	2.50938	2.52202	2.51128	2.49327	2.51873	2.50786	2.50944	2.4553	2.47695	2.48718	2.49144	2.40125	2.40617	2.41099	2.41231	2.77654	2.72423	2.70433	2.71226	2.22824	2.21311	2.21154	2.21335
3682	2.44033	2.43886	2.44147	2.43599	2.41277	2.42406	2.43198	2.44641	2.40453	2.41168	2.4199	2.41622	2.41274	2.42279	2.43259	2.43245	2.40475	2.42922	2.42462	2.41914	2.37879	2.38962	2.40347	2.4089	2.32342	2.32466	2.33148	2.33267	2.70877	2.65505	2.6361	2.63626	2.15282	2.14148	2.13856	2.14626
3684	2.36276	2.36086	2.36038	2.35656	2.33139	2.35024	2.35606	2.36486	2.33311	2.32848	2.34391	2.3352	2.33439	2.34287	2.34745	2.3566	2.32367	2.34769	2.34854	2.33706	2.29863	2.30926	2.32553	2.33444	2.25376	2.2457	2.26411	2.26077	2.64176	2.58351	2.5722	2.56334	2.0873	2.07476	2.07168	2.07899
3686	2.28612	2.28477	2.28416	2.28087	2.25902	2.26909	2.27765	2.29192	2.25671	2.25627	2.26462	2.26071	2.25617	2.27077	2.27361	2.27608	2.24682	2.2654	2.27143	2.25415	2.21659	2.22883	2.24468	2.25856	2.18645	2.17466	2.19938	2.19159	2.57654	2.51779	2.51497	2.4977	2.03196	2.02209	2.01816	2.01975
3688	2.20932	2.20773	2.20614	2.20361	2.1897	2.18855	2.20088	2.22174	2.17872	2.18709	2.18628	2.1879	2.18209	2.2008	2.20333	2.19661	2.17833	2.19201	2.20116	2.18112	2.14759	2.15638	2.17251	2.19092	2.11264	2.11455	2.12835	2.13057	2.50988	2.45363	2.45326	2.43769	1.97879	1.96964	1.96645	1.96249
3690	2.13841	2.13782	2.13828	2.13834	2.12625	2.12283	2.13286	2.15649	2.10923	2.1199	2.11801	2.1185	2.11576	2.13362	2.13407	2.12857	2.1145	2.1196	2.13287	2.12214	2.08222	2.08609	2.0994	2.12474	2.04556	2.05851	2.05394	2.06808	2.44614	2.39354	2.39276	2.3802	1.9169	1.90406	1.90784	1.90482
3692	2.06896	2.06821	2.07119	2.07368	2.06286	2.06161	2.06632	2.0914	2.04196	2.05025	2.05313	2.04958	2.05145	2.06356	2.06338	2.06346	2.05365	2.05619	2.06836	2.06316	2.02484	2.02807	2.0362	2.06215	1.98991	2.00027	1.99111	2.00495	2.38169	2.32865	2.32522	2.32092	1.85739	1.83527	1.84483	1.84439
3694	2.00863	2.00631	2.01332	2.01394	2.00208	2.00316	2.00243	2.03084	1.97879	1.98924	1.99412	1.99005	1.99225	2.00085	2.00347	2.00279	1.98567	1.99549	1.99977	2.00087	1.96756	1.974	1.97515	1.99637	1.93702	1.93649	1.92989	1.93381	2.33085	2.27616	2.26205	2.26243	1.80567	1.79557	1.79556	1.79341
3696	1.95004	1.9449	1.95577	1.94973	1.94036	1.94264	1.9359	1.96893	1.91705	1.92707	1.93377	1.92925	1.93457	1.93756	1.94301	1.94104	1.92138	1.94196	1.93933	1.93486	1.91523	1.92381	1.92011	1.93689	1.87869	1.87625	1.88027	1.87757	2.28198	2.22761	2.20728	2.21541	1.75764	1.76204	1.74939	1.74275
3698	1.90033	1.89615	1.90228	1.89577	1.89001	1.89047	1.88457	1.91298	1.86872	1.87531	1.88289	1.8778	1.88348	1.88761	1.8918	1.89068	1.86922	1.89194	1.88568	1.87902	1.86182	1.86502	1.86327	1.87878	1.81935	1.81594	1.83379	1.82537	2.23578	2.18242	2.15822	2.17036	1.71595	1.71956	1.70464	1.69953
3700	1.8514	1.84703	1.8461	1.84178	1.84173	1.8398	1.83625	1.85729	1.82421	1.82422	1.83132	1.82663	1.83149	1.83779	1.84002	1.84311	1.82083	1.84498	1.83589	1.82552	1.811	1.81391	1.81258	1.82956	1.77456	1.77215	1.79069	1.78049	2.18055	2.1301	2.11854	2.12895	1.67492	1.66328	1.65583	1.65353
3702	1.80744	1.80278	1.79875	1.79714	1.79686	1.79491	1.79194	1.81007	1.78183	1.78061	1.78917	1.7838	1.78674	1.79314	1.79525	1.80034	1.77772	1.79941	1.79073	1.78196	1.75554	1.76702	1.76902	1.78525	1.73282	1.73152	1.74547	1.73503	2.13589	2.08106	2.07776	2.08233	1.63542	1.61749	1.61815	1.61632
3704	1.75944	1.7526	1.75662	1.75258	1.7437	1.74825	1.74297	1.76505	1.73433	1.7348	1.74787	1.74023	1.73802	1.74223	1.7466	1.75131	1.73277	1.75114	1.74538	1.73885	1.71108	1.72303	1.72718	1.74607	1.69038	1.69181	1.70268	1.69442	2.08909	2.04049	2.03498	2.03659	1.5902	1.57577	1.58157	1.57532
3706	1.71762	1.70961	1.71867	1.71237	1.69914	1.70609	1.70305	1.72381	1.69207	1.6936	1.70986	1.69967	1.69336	1.70096	1.70527	1.7101	1.69313	1.70261	1.69744	1.69951	1.67386	1.67545	1.68335	1.71039	1.63969	1.64608	1.65433	1.64964	2.05005	2.00339	1.98567	1.98302	1.55231	1.54076	1.54805	1.53927
3708	1.67244	1.668	1.67422	1.66799	1.65746	1.66011	1.66365	1.67772	1.64857	1.6506	1.66473	1.65222	1.64705	1.66036	1.66119	1.66904	1.64856	1.65065	1.6464	1.65444	1.63848	1.62794	1.638	1.67217	1.59563	1.60662	1.61214	1.60924	2.01097	1.96231	1.95006	1.94541	1.51151	1.50283	1.49965	1.50021
3710	1.6307	1.62926	1.62941	1.62686	1.61974	1.62023	1.62771	1.63657	1.61051	1.61181	1.62237	1.61159	1.60858	1.62272	1.62069	1.62935	1.60527	1.61467	1.61025	1.61544	1.59596	1.58789	1.60368	1.62849	1.55049	1.56507	1.566	1.56429	1.9788	1.92373	1.91561	1.9114	1.47962	1.47301	1.46778	1.47166
3712	1.58851	1.58608	1.58744	1.58727	1.57833	1.58256	1.57994	1.59411	1.56674	1.57143	1.5802	1.57376	1.57136	1.57873	1.57536	1.58159	1.55528	1.58204	1.57604	1.5739	1.55443	1.55133	1.57099	1.57896	1.52023	1.53195	1.52993	1.52529	1.94582	1.89479	1.88787	1.88387	1.44755	1.44617	1.44625	1.44687
3714	1.55152	1.54847	1.54644	1.5517	1.54184	1.55016	1.54005	1.55954	1.53071	1.53837	1.54449	1.54137	1.5416	1.54181	1.53776	1.54267	1.52441	1.55138	1.54437	1.54	1.52289	1.5228	1.54004	1.54843	1.49146	1.49933	1.50165	1.49252	1.91694	1.86388	1.85481	1.85262	1.4228	1.42322	1.42642	1.42632
3716	1.51798	1.52102	1.51752	1.52361	1.51187	1.51944	1.51217	1.53247	1.50488	1.51195	1.51405	1.5123	1.51202	1.51249	1.51291	1.5137	1.50421	1.51337	1.50963	1.508	1.49285	1.49505	1.50426	1.52108	1.46724	1.47008	1.4757	1.4623	1.88361	1.83295	1.82533	1.82324	1.39548	1.39289	1.39482	1.39968
3718	1.48776	1.49468	1.4909	1.49523	1.48403	1.49014	1.48678	1.50736	1.47943	1.48583	1.48529	1.48542	1.48363	1.48556	1.48868	1.4876	1.4802	1.48315	1.48482	1.47983	1.4652	1.46735	1.47328	1.49094	1.42971	1.43769	1.44476	1.43219	1.84968	1.79621	1.786	1.79122	1.37338	1.36709	1.36557	1.37385
3720	1.46243	1.46517	1.46413	1.46565	1.45611	1.45894	1.45904	1.47798	1.44916	1.45303	1.45362	1.45376	1.4504	1.45851	1.45816	1.45878	1.43838	1.45414	1.45321	1.44656	1.43492	1.43196	1.44153	1.45066	1.40104	1.40966	1.41418	1.40272	1.82429	1.769	1.75669	1.76411	1.34842	1.34371	1.34406	1.34913
3722	1.43562	1.43101	1.43163	1.43244	1.42636	1.42548	1.42843	1.44639	1.41718	1.41796	1.421	1.41998	1.41887	1.42938	1.4231	1.42874	1.40516	1.42901	1.4256	1.41695	1.40884	1.40515	1.41574	1.42192	1.37885	1.38412	1.38594	1.38409	1.79975	1.73973	1.73225	1.73916	1.33004	1.31992	1.32369	1.32334
3724	1.41081	1.40477	1.40569	1.40577	1.40071	1.39893	1.40205	1.42222	1.39276	1.39384	1.39515	1.39273	1.39379	1.40331	1.39816	1.40335	1.37895	1.40082	1.39131	1.39322	1.37909	1.37555	1.38616	1.39741	1.35947	1.35896	1.35764	1.36479	1.78026	1.71887	1.71283	1.71758	1.31367	1.30413	1.30431	1.3007
3726	1.38086	1.3785	1.3758	1.37543	1.37151	1.3729	1.3737	1.39673	1.36719	1.36816	1.36916	1.36525	1.36986	1.37577	1.37315	1.37614	1.35901	1.37963	1.36465	1.37131	1.35499	1.35386	1.36253	1.37881	1.33269	1.33694	1.33958	1.34356	1.75851	1.69688	1.68956	1.69698	1.29859	1.28701	1.28321	1.27842
3728	1.35905	1.35649	1.35457	1.35536	1.35164	1.35298	1.3533	1.37182	1.34449	1.34446	1.34743	1.34329	1.34343	1.35212	1.35041	1.35231	1.33817	1.35206	1.34035	1.35283	1.32819	1.328	1.33498	1.35652	1.31003	1.31393	1.31959	1.31333	1.74083	1.68246	1.66824	1.67525	1.27766	1.26696	1.26545	1.26191
3730	1.33511	1.33245	1.33127	1.33319	1.33227	1.33039	1.3318	1.34189	1.31621	1.31453	1.32246	1.31814	1.31469	1.32621	1.32181	1.32476	1.31893	1.32848	1.32177	1.33228	1.31004	1.30868	1.3157	1.33985	1.29917	1.29681	1.29969	1.29314	1.71798	1.66563	1.64717	1.65748	1.25563	1.24302	1.24342	1.24262
3732	1.31739	1.31462	1.31479	1.31543	1.31409	1.31265	1.31713	1.3231	1.30059	1.30084	1.30832	1.30179	1.30223	1.3112	1.30564	1.31036	1.29569	1.30859	1.30182	1.31287	1.29137	1.28993	1.30118	1.31853	1.28807	1.27602	1.27568	1.27276	1.69792	1.64976	1.62729	1.63733	1.23472	1.23019	1.22865	1.22624
3734	1.29582	1.29575	1.29497	1.29018	1.28903	1.29142	1.29895	1.30397	1.28629	1.28786	1.29226	1.28357	1.28987	1.29465	1.28857	1.29607	1.27298	1.29098	1.28419	1.29004	1.27626	1.27518	1.28895	1.30246	1.26462	1.25939	1.2611	1.25859	1.6699	1.62362	1.60997	1.61822	1.21442	1.21925	1.2089	1.20583
3736	1.27927	1.28109	1.27852	1.27292	1.27074	1.27577	1.28176	1.29057	1.27252	1.2738	1.27666	1.27032	1.27452	1.28011	1.27401	1.2807	1.25559	1.27149	1.26434	1.27202	1.25657	1.25345	1.26891	1.28243	1.23317	1.23887	1.24358	1.24181	1.65364	1.60453	1.59357	1.59257	1.20493	1.20822	1.19537	1.19345
3738	1.25636	1.25561	1.25764	1.25538	1.24965	1.25656	1.25635	1.27421	1.24906	1.24831	1.25359	1.25381	1.24804	1.25835	1.24949	1.25647	1.23783	1.25272	1.24499	1.25294	1.24318	1.23539	1.24843	1.26535	1.21901	1.22408	1.22877	1.22997	1.63795	1.59011	1.57981	1.5753	1.19587	1.1915	1.17843	1.18023
3740	1.24189	1.23972	1.24194	1.24173	1.23585	1.2417	1.24112	1.26041	1.23148	1.23033	1.23672	1.24026	1.23254	1.24153	1.23366	1.23747	1.224	1.23584	1.22941	1.23605	1.22869	1.22083	1.23134	1.24385	1.20569	1.20456	1.20722	1.20747	1.62555	1.57646	1.56228	1.55491	1.18054	1.17553	1.16612	1.16894
3742	1.22539	1.22231	1.22688	1.22515	1.22174	1.22195	1.22483	1.23935	1.20967	1.21378	1.21932	1.21856	1.21365	1.22013	1.21704	1.21575	1.20772	1.21787	1.21315	1.21351	1.21426	1.20581	1.2146	1.22363	1.18967	1.18986	1.19263	1.1922	1.6044	1.55428	1.54253	1.54239	1.15811	1.15351	1.14915	1.15076
3744	1.21047	1.20882	1.21326	1.21081	1.20966	1.20538	1.21089	1.22346	1.19548	1.20099	1.20423	1.20235	1.19909	1.20349	1.20382	1.20148	1.19331	1.19994	1.19748	1.19861	1.19015	1.18385	1.19672	1.20579	1.16625	1.17215	1.17536	1.17498	1.5894	1.5356	1.51852	1.52345	1.14724	1.13938	1.13719	1.13914
3746	1.18539	1.19014	1.19322	1.19031	1.18841	1.18545	1.18948	1.20137	1.18092	1.1825	1.18282	1.18301	1.17737	1.1804	1.18553	1.18742	1.17631	1.17976	1.17986	1.18009	1.1719	1.16619	1.17903	1.18724	1.15258	1.15958	1.16309	1.16155	1.5686	1.52458	1.50852	1.51403	1.13653	1.12402	1.12155	1.12611
3748	1.16883	1.17496	1.17445	1.17516	1.17275	1.17339	1.17443	1.18574	1.16918	1.16836	1.1685	1.17041	1.16469	1.16731	1.17122	1.17647	1.16567	1.1663	1.16794	1.16959	1.16241	1.16013	1.16945	1.17463	1.13834	1.14019	1.14807	1.15034	1.55586	1.51303	1.49876	1.50411	1.12666	1.1136	1.10872	1.11751
3750	1.1606	1.15975	1.16036	1.1636	1.16037	1.15902	1.16127	1.17265	1.1518	1.1534	1.1567	1.15625	1.15165	1.16184	1.15618	1.16019	1.15094	1.1522	1.15484	1.1528	1.15317	1.15418	1.15899	1.16386	1.1277	1.12634	1.13586	1.14044	1.54284	1.49791	1.4861	1.49395	1.11167	1.10078	1.09425	1.10409
3752	1.15351	1.14764	1.14814	1.15318	1.151	1.14786	1.15097	1.16337	1.13785	1.14188	1.14788	1.14383	1.14121	1.15596	1.14446	1.14731	1.13733	1.14319	1.1401	1.14124	1.136	1.13806	1.14361	1.15493	1.11135	1.11189	1.11854	1.12239	1.53136	1.48205	1.46384	1.4734	1.10169	1.09274	1.08522	1.09507
3754	1.1377	1.1365	1.13953	1.14016	1.13871	1.13486	1.13495	1.15164	1.1271	1.1265	1.1363	1.12558	1.12636	1.13492	1.13075	1.13414	1.11974	1.13304	1.12123	1.12586	1.11718	1.11735	1.12032	1.14264	1.1019	1.10386	1.10575	1.10659	1.51612	1.46997	1.45191	1.45867	1.08875	1.08461	1.0752	1.08394
3756	1.1232	1.1265	1.12892	1.12606	1.12696	1.12281	1.12079	1.14046	1.11782	1.11333	1.12549	1.11135	1.11518	1.11753	1.11951	1.12292	1.10952	1.1229	1.1119	1.11558	1.10713	1.10926	1.11092	1.13566	1.09321	1.09679	1.09598	1.0938	1.5027	1.45559	1.44019	1.44404	1.08044	1.07753	1.06745	1.07364
3758	1.11334	1.11498	1.11768	1.11316	1.11458	1.11233	1.11111	1.12742	1.1093	1.10306	1.11189	1.10449	1.10844	1.10966	1.1118	1.11137	1.10013	1.10561	1.10285	1.10745	1.09856	1.10102	1.10269	1.12623	1.08771	1.08982	1.0886	1.08258	1.49337	1.4448	1.43166	1.43378	1.07102	1.06686	1.06022	1.05969
3760	1.10412	1.10234	1.10475	1.10045	1.10299	1.1037	1.10319	1.11523	1.10109	1.0934	1.09831	1.09799	1.10195	1.10181	1.10316	1.1012	1.09431	1.09293	1.09526	1.10051	1.09131	1.08977	1.09524	1.11678	1.0759	1.0772	1.07861	1.07415	1.48536	1.43169	1.42036	1.42403	1.06421	1.05861	1.05392	1.04897
3762	1.09651	1.09357	1.09502	1.09421	1.09391	1.0941	1.09304	1.10642	1.08872	1.08621	1.0901	1.08518	1.08922	1.09119	1.0921	1.09093	1.08414	1.07648	1.08292	1.08363	1.0806	1.0745	1.08392	1.10278	1.0677	1.0666	1.06902	1.06662	1.47249	1.42548	1.41294	1.41608	1.05445	1.05169	1.04982	1.04376
3764	1.08873	1.08493	1.08212	1.08817	1.08424	1.08382	1.08297	1.09841	1.0762	1.07917	1.08316	1.07278	1.07834	1.08107	1.07988	1.08098	1.07626	1.0718	1.07512	1.07021	1.0713	1.06835	1.0781	1.09544	1.06036	1.05858	1.06333	1.06587	1.45873	1.41736	1.39994	1.40463	1.04799	1.04436	1.04545	1.03935
3766	1.08191	1.07848	1.07529	1.08161	1.07783	1.07721	1.07659	1.09449	1.07241	1.07415	1.07507	1.06939	1.07207	1.0756	1.07485	1.07591	1.06513	1.07473	1.06669	1.06391	1.06124	1.06494	1.06926	1.08776	1.05392	1.05069	1.0573	1.06469	1.4545	1.4114	1.39169	1.39571	1.03907	1.0344	1.03422	1.02963
3768	1.07348	1.07082	1.06812	1.07118	1.0695	1.07061	1.06847	1.08983	1.0694	1.06781	1.06505	1.06621	1.06619	1.07043	1.07003	1.07045	1.05711	1.0737	1.06252	1.05882	1.05568	1.06062	1.06236	1.07891	1.04037	1.0441	1.04917	1.0542	1.45053	1.40301	1.38372	1.38485	1.03367	1.02465	1.02138	1.01952
3770	1.06785	1.06638	1.06264	1.06479	1.06106	1.06469	1.06378	1.07976	1.06195	1.06041	1.05855	1.05754	1.05973	1.06414	1.06425	1.06407	1.05058	1.06484	1.05719	1.05677	1.04636	1.0511	1.05126	1.06132	1.03066	1.03775	1.03904	1.03735	1.44227	1.39561	1.37874	1.37548	1.02541	1.02012	1.0139	1.0184
3772	1.05999	1.06051	1.05261	1.05553	1.05127	1.05627	1.0583	1.0658	1.05031	1.05085	1.05114	1.04535	1.05204	1.05569	1.05531	1.05508	1.04653	1.05693	1.05112	1.05431	1.04188	1.04428	1.04453	1.05323	1.02957	1.03095	1.03452	1.02813	1.43084	1.38269	1.37348	1.37071	1.01982	1.0167	1.00818	1.01766
3774	1.05249	1.05497	1.0474	1.05026	1.04674	1.05033	1.05261	1.06157	1.04495	1.04407	1.0482	1.04174	1.04662	1.04799	1.04847	1.04823	1.04112	1.04653	1.03818	1.04715	1.03728	1.03357	1.03542	1.04887	1.02928	1.02354	1.02958	1.01966	1.42279	1.37643	1.36831	1.36594	1.0167	1.01488	1.00687	1.0121
3776	1.04174	1.04614	1.04319	1.04133	1.04161	1.04269	1.04509	1.05887	1.03934	1.0351	1.04588	1.03891	1.04084	1.03709	1.03828	1.03929	1.03613	1.04084	1.03211	1.03918	1.03376	1.02932	1.02978	1.04645	1.02354	1.02068	1.02622	1.01802	1.41299	1.37071	1.36297	1.36019	1.01397	1.01251	1.00676	1.00548
3778	1.03938	1.04106	1.03964	1.03833	1.03893	1.03943	1.03977	1.05411	1.03499	1.03097	1.04157	1.03597	1.03434	1.03513	1.03409	1.03382	1.02984	1.04144	1.03348	1.0355	1.02767	1.02781	1.02368	1.04306	1.01793	1.01924	1.02123	1.01778	1.41505	1.36607	1.35812	1.35239	1.01475	1.01186	1.00368	1.00544
3780	1.03932	1.03523	1.03384	1.0365	1.0357	1.03572	1.03238	1.04631	1.02794	1.02721	1.03294	1.03139	1.02582	1.03543	1.03013	1.02843	1.02453	1.04194	1.03229	1.03026	1.02527	1.02543	1.019	1.04095	1.01625	1.01884	1.01851	1.01684	1.42218	1.36157	1.3485	1.3501	1.01578	1.01037	0.998376	1.00727
3782	1.03788	1.03267	1.03043	1.03458	1.03262	1.03289	1.03115	1.04352	1.02461	1.02411	1.03118	1.02841	1.02362	1.03268	1.02822	1.02748	1.02305	1.03639	1.02612	1.02599	1.02463	1.01715	1.0172	1.03863	1.01365	1.01874	1.01452	1.01407	1.41889	1.35946	1.33972	1.34866	1.01094	1.0054	0.99764	1.00464
3784	1.03494	1.03025	1.02705	1.03051	1.0283	1.02911	1.03106	1.04228	1.02132	1.01967	1.03178	1.02326	1.02219	1.02637	1.02628	1.02636	1.02076	1.03126	1.02132	1.0208	1.02087	1.01201	1.01722	1.03642	1.00775	1.01559	1.01123	1.01108	1.40884	1.34928	1.33798	1.34471	1.00455	0.996867	0.997966	0.997984
3786	1.02946	1.02592	1.02362	1.02632	1.02444	1.02528	1.0281	1.03759	1.01792	1.0174	1.02772	1.01917	1.01948	1.0206	1.02272	1.02395	1.01519	1.02253	1.0124	1.01619	1.00584	1.00682	1.01776	1.0297	1.00011	1.00898	1.0039	1.00139	1.4014	1.3416	1.33751	1.33706	0.995166	0.990505	0.988717	0.993495
3788	1.01694	1.01458	1.01789	1.01946	1.01681	1.01804	1.0208	1.02681	1.0105	1.01503	1.01709	1.01203	1.01437	1.01189	1.01419	1.01682	1.00772	1.0115	1.00491	1.00804	0.999033	1.00396	1.01599	1.02409	0.992142	1.00288	0.999148	0.994984	1.39014	1.33667	1.33342	1.32947	0.985029	0.982529	0.968448	0.986307
3790	1.0094	1.00881	1.01325	1.01415	1.01263	1.01297	1.0154	1.02098	1.00497	1.01016	1.01136	1.00778	1.00941	1.00718	1.00947	1.01002	0.999692	1.0017	1.0021	1.00346	0.998044	0.999836	1.00316	1.02084	0.981824	0.992838	0.993183	0.987932	1.38429	1.33352	1.32624	1.31771	0.985552	0.980464	0.966	0.983522
3792	1.00143	1.00313	1.00213	1.00178	1.00706	1.00559	1.0046	1.01439	0.99726	0.998514	1.00229	1.00302	0.999621	1.00163	1.00225	0.998272	0.9914	0.995792	0.998595	0.997864	0.996939	0.996335	0.992244	1.01785	0.979096	0.989594	0.988826	0.986061	1.3788	1.32844	1.31826	1.31378	0.988417	0.978609	0.973207	0.980866
3794	0.997677	1.00029	0.99532	0.997286	1.00298	1.00086	0.999707	1.01146	0.994134	0.993782	0.997747	0.998015	0.995901	0.99869	0.997415	0.993334	0.99025	0.995777	0.997537	0.995564	0.99185	0.993981	0.992152	1.00998	0.978223	0.990045	0.983391	0.986423	1.37507	1.32591	1.31059	1.31219	0.988573	0.977135	0.972821	0.978757
3796	0.995433	0.999296	0.99577	1.00104	0.993947	0.993732	0.99519	1.0115	0.992172	0.994066	0.995272	0.990474	0.993014	0.996654	0.993188	0.991779	0.989941	0.994757	0.99683	0.994877	0.98762	0.991352	0.992328	1.00351	0.977532	0.988566	0.979718	0.985857	1.37035	1.3245	1.30991	1.31191	0.984914	0.974248	0.965663	0.974283
3798	0.994121	0.997348	0.995334	1.00172	0.989109	0.990978	0.993487	1.01013	0.99058	0.992272	0.994151	0.986831	0.990697	0.994272	0.991447	0.989685	0.987692	0.993739	0.991653	0.992416	0.987002	0.985349	0.987393	1.00248	0.976608	0.981685	0.974653	0.981718	1.36469	1.32133	1.31007	1.30821	0.978156	0.972246	0.961771	0.968162
3800	0.992456	0.991091	0.988856	0.990812	0.986254	0.992738	0.991296	1.00436	0.986176	0.982636	0.992871	0.983756	0.988024	0.98889	0.989998	0.984551	0.983263	0.993161	0.983989	0.987268	0.985691	0.979842	0.9812	1.00131	0.971092	0.97381	0.970515	0.978231	1.35372	1.31424	1.30616	1.30314	0.969126	0.968661	0.953911	0.957752
3802	0.990374	0.985571	0.982843	0.982636	0.983502	0.991518	0.987821	0.998301	0.982893	0.976975	0.990036	0.980387	0.984078	0.984817	0.987825	0.98065	0.977267	0.984655	0.977713	0.982165	0.978709	0.974344	0.97451	0.992135	0.960294	0.962204	0.964219	0.972161	1.34917	1.30711	1.29936	1.29437	0.967698	0.964546	0.950755	0.954583
3804	0.985743	0.978026	0.975163	0.977769	0.978412	0.982586	0.979198	0.984845	0.976653	0.969289	0.980747	0.971132	0.974464	0.975846	0.978542	0.973957	0.968563	0.971816	0.97149	0.970519	0.973178	0.969351	0.966889	0.982023	0.956685	0.958889	0.961841	0.96768	1.34965	1.30251	1.2932	1.28923	0.967782	0.957264	0.951316	0.953069
3806	0.982046	0.973423	0.968928	0.974241	0.975802	0.977674	0.974037	0.978048	0.972184	0.964887	0.974282	0.965842	0.969038	0.970468	0.97155	0.969514	0.965925	0.968591	0.969562	0.964922	0.971069	0.965932	0.962152	0.982934	0.954645	0.957476	0.959417	0.960718	1.35013	1.29943	1.28321	1.28087	0.967131	0.952354	0.951004	0.95211
3808	0.972503	0.970828	0.967063	0.969571	0.974682	0.97446	0.969123	0.979403	0.966124	0.963435	0.969007	0.964553	0.964914	0.96835	0.966388	0.965769	0.965664	0.966577	0.967864	0.958737	0.969642	0.963584	0.95758	0.984224	0.953833	0.954653	0.956491	0.956015	1.35026	1.29821	1.28036	1.27944	0.966215	0.947742	0.94837	0.950332
3810	0.966076	0.969133	0.965347	0.966219	0.972689	0.971643	0.965814	0.980236	0.961761	0.961965	0.96487	0.963878	0.962675	0.966423	0.963278	0.963752	0.962757	0.965729	0.964822	0.956162	0.968118	0.95939	0.95775	0.978156	0.952813	0.947791	0.950309	0.950244	1.34798	1.29671	1.27699	1.28429	0.962143	0.945627	0.945531	0.947446
3812	0.963271	0.967783	0.962446	0.96445	0.966357	0.967979	0.960652	0.978013	0.955165	0.960118	0.959389	0.963888	0.960138	0.9601	0.962564	0.962252	0.955506	0.964561	0.959982	0.958418	0.966245	0.954405	0.959086	0.970557	0.949985	0.945067	0.947095	0.945008	1.33927	1.28768	1.27217	1.28287	0.952691	0.94139	0.940814	0.940442
3814	0.961501	0.966227	0.958796	0.962945	0.960835	0.964669	0.957076	0.97563	0.951605	0.958308	0.95632	0.963127	0.957377	0.954694	0.961329	0.959952	0.952396	0.960331	0.955959	0.959161	0.957962	0.954012	0.956511	0.967149	0.943939	0.945976	0.946443	0.937985	1.3333	1.2785	1.26188	1.27194	0.950479	0.938966	0.938285	0.937197
3816	0.95837	0.961414	0.954071	0.961074	0.956517	0.958203	0.95476	0.970923	0.952855	0.954065	0.95413	0.956536	0.950583	0.949342	0.95198	0.952977	0.950464	0.954175	0.950632	0.952768	0.948601	0.952538	0.95186	0.963051	0.94141	0.94579	0.945448	0.933645	1.32302	1.2766	1.26152	1.26744	0.949004	0.936563	0.936254	0.936134
3818	0.955732	0.957186	0.949176	0.959093	0.952128	0.953119	0.952749	0.967467	0.952227	0.950544	0.952231	0.95074	0.94667	0.946259	0.944906	0.947608	0.948924	0.949264	0.946911	0.947155	0.944246	0.945597	0.946897	0.96192	0.939094	0.939409	0.937614	0.934321	1.31654	1.2754	1.26553	1.26535	0.945198	0.933943	0.933679	0.933071
3820	0.951344	0.953795	0.945893	0.952354	0.945611	0.948914	0.95025	0.963717	0.943984	0.944608	0.9489	0.943992	0.943306	0.947355	0.942743	0.943537	0.944941	0.941345	0.941165	0.939837	0.940278	0.936472	0.939623	0.962253	0.934195	0.933595	0.930937	0.93492	1.31495	1.26789	1.2609	1.26163	0.938224	0.92688	0.923321	0.923988
3822	0.947486	0.950371	0.942803	0.945109	0.941054	0.945934	0.947673	0.960212	0.937423	0.938742	0.945381	0.939009	0.94055	0.947514	0.940508	0.940879	0.939536	0.937201	0.937413	0.936052	0.933571	0.928046	0.937127	0.957426	0.924574	0.926804	0.927082	0.933746	1.31259	1.25756	1.24384	1.2493	0.936137	0.92352	0.919203	0.919193
3824	0.944023	0.942052	0.940231	0.940861	0.936711	0.937889	0.939253	0.952702	0.935782	0.932244	0.938287	0.934616	0.934062	0.939316	0.934372	0.933997	0.92866	0.934426	0.932897	0.934621	0.927055	0.918306	0.934994	0.949762	0.922129	0.923703	0.924875	0.932669	1.30446	1.25833	1.23926	1.24368	0.934639	0.922647	0.924297	0.919538
3826	0.941734	0.934863	0.936976	0.936964	0.932962	0.931549	0.932483	0.947257	0.934542	0.927701	0.932994	0.931225	0.93042	0.932659	0.929202	0.9285	0.92452	0.934248	0.931738	0.934422	0.925767	0.917863	0.934462	0.947621	0.927339	0.920836	0.925559	0.931241	1.29901	1.26135	1.24317	1.24872	0.932538	0.921859	0.926585	0.919414
3828	0.942845	0.935847	0.933891	0.935409	0.93339	0.934496	0.933608	0.948848	0.933505	0.929979	0.935251	0.929397	0.93399	0.933108	0.930778	0.929345	0.925769	0.931844	0.934835	0.935232	0.924333	0.91941	0.933342	0.944626	0.927896	0.91863	0.92497	0.92909	1.29794	1.25342	1.24334	1.24974	0.92859	0.91827	0.920105	0.917365
3830	0.943258	0.937347	0.930496	0.934057	0.934308	0.937149	0.934242	0.949945	0.93217	0.932159	0.937359	0.927723	0.936272	0.933134	0.9332	0.930226	0.925556	0.930871	0.933515	0.933672	0.922281	0.921028	0.932113	0.940455	0.922358	0.914127	0.915329	0.921869	1.2973	1.24023	1.23824	1.23993	0.925452	0.915405	0.915483	0.914856
3832	0.93547	0.933626	0.929502	0.930363	0.931865	0.932098	0.929602	0.943264	0.925068	0.927229	0.933553	0.923056	0.931356	0.927983	0.929304	0.928438	0.925176	0.929255	0.926902	0.926128	0.919502	0.922856	0.929628	0.934247	0.919108	0.911447	0.908091	0.914987	1.29178	1.24009	1.23243	1.23403	0.923941	0.911415	0.912655	0.910434
3834	0.927055	0.928978	0.928214	0.926078	0.928856	0.927283	0.925855	0.937828	0.91877	0.921633	0.929732	0.920207	0.927047	0.923702	0.92456	0.927033	0.922936	0.926924	0.923737	0.921389	0.918191	0.923835	0.925936	0.934242	0.917448	0.911335	0.910981	0.914848	1.2868	1.24257	1.22182	1.23175	0.922752	0.909445	0.91084	0.906471
3836	0.925893	0.926671	0.926668	0.928207	0.925018	0.926913	0.925055	0.941439	0.918983	0.919084	0.927396	0.923109	0.926562	0.921569	0.924902	0.927243	0.91585	0.92245	0.919662	0.924671	0.916848	0.923879	0.920125	0.936725	0.91489	0.9105	0.913392	0.915306	1.2859	1.23583	1.21964	1.22954	0.917389	0.910576	0.903324	0.898934
3838	0.925173	0.924261	0.923583	0.931369	0.921237	0.92595	0.923671	0.943996	0.919013	0.916198	0.924986	0.924868	0.925487	0.918937	0.925005	0.927125	0.91281	0.920802	0.917743	0.925783	0.915188	0.918592	0.916492	0.934685	0.90885	0.906643	0.90662	0.910899	1.28565	1.22493	1.22335	1.22297	0.913015	0.909673	0.897337	0.894358
3840	0.924229	0.919632	0.922336	0.924784	0.919505	0.922924	0.919716	0.936121	0.913717	0.912909	0.923012	0.92148	0.919214	0.916291	0.920153	0.922029	0.911948	0.916442	0.917582	0.921353	0.913627	0.909468	0.913399	0.928937	0.905229	0.904059	0.901099	0.906476	1.27804	1.22761	1.22373	1.2194	0.907825	0.901023	0.896468	0.896723
3842	0.923044	0.91428	0.921175	0.915028	0.918332	0.91967	0.915685	0.927673	0.908239	0.911206	0.921553	0.917707	0.914912	0.914599	0.914138	0.91586	0.911245	0.913075	0.916262	0.917513	0.911181	0.908629	0.912617	0.925671	0.899221	0.90156	0.901827	0.905103	1.27104	1.23425	1.22032	1.22022	0.905523	0.894997	0.896281	0.897644
3844	0.920225	0.915639	0.9188	0.91222	0.916397	0.917474	0.911584	0.926162	0.907979	0.913821	0.91712	0.911353	0.912831	0.912619	0.910268	0.912452	0.907754	0.909028	0.911565	0.912601	0.906907	0.909476	0.911568	0.921318	0.895395	0.898458	0.903177	0.903033	1.27002	1.23056	1.21395	1.21965	0.903883	0.896795	0.893051	0.893106
3846	0.917229	0.918196	0.914887	0.910105	0.913569	0.915557	0.907603	0.925365	0.907871	0.916101	0.911629	0.904967	0.910704	0.910289	0.906863	0.909532	0.904869	0.907501	0.909598	0.908744	0.903465	0.907452	0.90871	0.918998	0.89277	0.89569	0.902612	0.898263	1.26883	1.22213	1.20071	1.21119	0.903469	0.898933	0.891144	0.889798
3848	0.914085	0.916643	0.912636	0.909604	0.909283	0.912819	0.906133	0.922881	0.904232	0.913357	0.911255	0.90473	0.906694	0.909433	0.906113	0.909208	0.900365	0.907912	0.906529	0.906488	0.899018	0.904229	0.903399	0.913447	0.891752	0.894575	0.90123	0.894312	1.26795	1.21761	1.19635	1.20524	0.903999	0.896215	0.891911	0.890491
3850	0.910191	0.913943	0.909762	0.908763	0.904685	0.909754	0.905398	0.92037	0.901079	0.909354	0.911643	0.904756	0.903007	0.908722	0.905476	0.908882	0.897384	0.908314	0.903629	0.905557	0.899524	0.900731	0.902353	0.914992	0.892397	0.894707	0.899969	0.89315	1.26685	1.21048	1.20136	1.20319	0.905434	0.893314	0.891567	0.891177
3852	0.907805	0.910313	0.908925	0.907398	0.90682	0.90808	0.909566	0.923955	0.903847	0.906662	0.910928	0.903988	0.902372	0.908524	0.906112	0.906219	0.896775	0.90713	0.901429	0.907032	0.901359	0.895368	0.902724	0.922829	0.892151	0.894999	0.898747	0.891431	1.25702	1.20875	1.20343	1.20089	0.908466	0.891779	0.888794	0.886054
3854	0.905465	0.905761	0.907921	0.906266	0.910129	0.906778	0.913671	0.928435	0.906855	0.903602	0.910182	0.902907	0.902199	0.907731	0.906712	0.903379	0.897357	0.906439	0.902514	0.907479	0.903385	0.893196	0.900993	0.921802	0.889658	0.897491	0.896022	0.890522	1.24744	1.20865	1.20268	1.19413	0.907099	0.891191	0.886401	0.881942
3856	0.906479	0.904925	0.905799	0.904117	0.909322	0.906649	0.907378	0.923968	0.902625	0.901648	0.906955	0.900387	0.900677	0.904765	0.904991	0.90111	0.898592	0.905408	0.90483	0.904153	0.905867	0.892888	0.89599	0.914663	0.886837	0.898202	0.893186	0.889267	1.24504	1.20511	1.1994	1.19043	0.899716	0.888362	0.882065	0.882883
3858	0.907754	0.904426	0.901634	0.901176	0.907122	0.906029	0.89931	0.917116	0.896879	0.900115	0.902855	0.897714	0.89822	0.901555	0.901598	0.898593	0.897073	0.903417	0.903482	0.900675	0.901286	0.894772	0.892726	0.91039	0.882079	0.890372	0.891662	0.888115	1.24296	1.20123	1.18858	1.18813	0.896149	0.884852	0.879661	0.884014
3860	0.902652	0.900396	0.898106	0.898545	0.902832	0.900288	0.897857	0.912565	0.894549	0.898495	0.898976	0.895995	0.892756	0.897094	0.897089	0.894804	0.890101	0.896626	0.897737	0.893537	0.892499	0.897639	0.888149	0.904599	0.880579	0.883401	0.890402	0.886394	1.24155	1.19594	1.18346	1.1866	0.894103	0.881022	0.880519	0.88332
3862	0.895636	0.895809	0.894075	0.894944	0.897449	0.89396	0.897038	0.909366	0.892836	0.896837	0.895138	0.894392	0.887838	0.89235	0.892767	0.890458	0.884376	0.893264	0.896	0.888126	0.89041	0.894775	0.886577	0.901568	0.887467	0.882773	0.88891	0.881372	1.23971	1.18657	1.18289	1.18449	0.892431	0.878832	0.881085	0.881759
3864	0.896319	0.896345	0.89382	0.893386	0.895759	0.893358	0.893549	0.909863	0.890714	0.892759	0.894424	0.890929	0.887584	0.89186	0.892355	0.890215	0.88054	0.8917	0.896453	0.886316	0.890979	0.886105	0.885869	0.899218	0.889036	0.882369	0.88695	0.876415	1.22697	1.18395	1.18368	1.18159	0.88956	0.876888	0.878084	0.875517
3866	0.897126	0.897613	0.895226	0.891007	0.894562	0.893284	0.888458	0.909818	0.887389	0.888215	0.893502	0.887146	0.887359	0.891613	0.891651	0.890368	0.878374	0.890645	0.89332	0.885339	0.889496	0.881272	0.884159	0.897152	0.877145	0.879129	0.880641	0.874597	1.21525	1.18122	1.18599	1.17236	0.889275	0.876256	0.875013	0.871029
3868	0.890828	0.891553	0.891734	0.888586	0.889192	0.890316	0.883333	0.900874	0.880847	0.884097	0.890883	0.884862	0.882689	0.888929	0.887321	0.884616	0.8743	0.88585	0.886026	0.884511	0.886102	0.877231	0.879371	0.89541	0.870578	0.876673	0.875353	0.872729	1.22548	1.18079	1.18561	1.16619	0.889524	0.876913	0.875257	0.872619
3870	0.882937	0.882898	0.884042	0.885977	0.88289	0.88707	0.879155	0.890645	0.874065	0.879233	0.888223	0.882649	0.879098	0.886683	0.882539	0.878022	0.872706	0.884632	0.882667	0.883583	0.885142	0.879542	0.877793	0.89556	0.873709	0.878219	0.880291	0.875237	1.23663	1.18329	1.17961	1.16826	0.887779	0.877184	0.875348	0.873693
3872	0.886109	0.884511	0.884564	0.887357	0.884763	0.887964	0.881223	0.893562	0.878326	0.881218	0.888889	0.881858	0.88204	0.888703	0.885836	0.880331	0.876925	0.887544	0.881252	0.885417	0.883484	0.885125	0.878394	0.894822	0.8756	0.879196	0.884827	0.87943	1.23023	1.1803	1.17485	1.16946	0.882198	0.878031	0.871998	0.872155
3874	0.891666	0.887848	0.888121	0.890007	0.887703	0.889409	0.883885	0.898517	0.883962	0.884559	0.889498	0.881122	0.884198	0.89052	0.890052	0.883743	0.878664	0.886009	0.880134	0.886318	0.878966	0.882811	0.87908	0.894621	0.873173	0.873	0.878642	0.872559	1.22198	1.17204	1.16581	1.1629	0.87968	0.878561	0.86969	0.870667
3876	0.890258	0.887494	0.885378	0.887973	0.887185	0.886782	0.881947	0.896433	0.878984	0.884207	0.887212	0.877786	0.882231	0.887125	0.886675	0.88234	0.879265	0.877093	0.878859	0.878823	0.873626	0.874873	0.879975	0.894651	0.871324	0.866796	0.872271	0.862902	1.21324	1.17112	1.16186	1.1585	0.882082	0.874249	0.869944	0.868367
3878	0.886659	0.886319	0.878239	0.884622	0.886157	0.883387	0.878798	0.893006	0.871682	0.882514	0.883842	0.873935	0.880534	0.883061	0.881447	0.880099	0.878002	0.875653	0.877215	0.873543	0.872897	0.869444	0.879043	0.89331	0.868123	0.86639	0.873003	0.866351	1.20503	1.17262	1.16054	1.1594	0.882987	0.870372	0.869513	0.86655
3880	0.884404	0.88341	0.875935	0.883128	0.883479	0.883436	0.877431	0.889787	0.872342	0.878914	0.882211	0.874173	0.878583	0.881082	0.879812	0.879157	0.872028	0.880126	0.87378	0.877192	0.873434	0.863308	0.875372	0.888404	0.864484	0.866557	0.873532	0.871342	1.20412	1.16897	1.15894	1.1598	0.875705	0.865395	0.865468	0.864893
3882	0.881875	0.880184	0.874837	0.880987	0.880176	0.883761	0.8762	0.886138	0.874632	0.875137	0.880497	0.874536	0.877024	0.878156	0.878298	0.877934	0.868504	0.880644	0.872461	0.878522	0.870262	0.865905	0.873134	0.885474	0.858133	0.861563	0.869599	0.864993	1.2048	1.15992	1.15343	1.15661	0.872116	0.861367	0.863204	0.864117
3884	0.876561	0.879744	0.873178	0.877779	0.877096	0.881448	0.87134	0.885888	0.874211	0.872649	0.874453	0.871872	0.875245	0.873208	0.87562	0.873511	0.867407	0.878507	0.869407	0.871285	0.86613	0.873036	0.871483	0.881986	0.85696	0.857351	0.86532	0.856534	1.20702	1.15813	1.15267	1.15249	0.874252	0.860841	0.867235	0.863021
3886	0.870399	0.878809	0.870216	0.873293	0.873994	0.87843	0.866504	0.886621	0.872723	0.870205	0.868637	0.868263	0.873832	0.868274	0.872486	0.869776	0.865583	0.876907	0.866524	0.86655	0.867824	0.872457	0.871423	0.881422	0.862333	0.860365	0.864229	0.857525	1.20844	1.15901	1.15668	1.14738	0.873854	0.859692	0.86918	0.861672
3888	0.871832	0.876505	0.870102	0.872866	0.873068	0.876605	0.870727	0.887133	0.868661	0.871137	0.872456	0.866289	0.869567	0.870823	0.871528	0.87147	0.859254	0.87214	0.864856	0.870316	0.87015	0.868231	0.873299	0.883034	0.864565	0.86253	0.864015	0.859271	1.20017	1.15692	1.15507	1.14393	0.867285	0.853728	0.861312	0.859258
3890	0.874661	0.873719	0.870883	0.873015	0.871441	0.874504	0.875284	0.887154	0.864027	0.872439	0.877077	0.864588	0.864692	0.873988	0.871182	0.872238	0.856892	0.86874	0.864237	0.872912	0.871092	0.865937	0.871657	0.882694	0.862471	0.857266	0.862357	0.858299	1.192	1.15236	1.14068	1.13862	0.863937	0.849955	0.85571	0.857197
3892	0.874423	0.870037	0.869128	0.869399	0.870048	0.872003	0.872723	0.882424	0.86305	0.871154	0.871804	0.862725	0.860277	0.870014	0.870844	0.864368	0.859515	0.866019	0.864704	0.867019	0.871107	0.863898	0.864675	0.881372	0.859811	0.853657	0.860315	0.856924	1.18917	1.1465	1.13368	1.13546	0.861376	0.851566	0.850935	0.852917
3894	0.873237	0.865953	0.865922	0.864409	0.868555	0.869815	0.86912	0.877186	0.862506	0.868316	0.865631	0.861406	0.857656	0.865066	0.86973	0.857193	0.859991	0.865274	0.862803	0.862497	0.863941	0.862037	0.860914	0.876811	0.853802	0.854478	0.854145	0.853195	1.18745	1.13806	1.13049	1.1348	0.861677	0.853464	0.849056	0.850661
3896	0.870049	0.865433	0.862928	0.862837	0.866422	0.870058	0.865584	0.873071	0.858241	0.863303	0.86522	0.860625	0.859651	0.861813	0.865004	0.860697	0.855858	0.863357	0.857408	0.862206	0.854032	0.860921	0.856958	0.869597	0.851736	0.854041	0.849979	0.850035	1.18307	1.13724	1.13108	1.13382	0.862169	0.855261	0.856412	0.853569
3898	0.866939	0.865741	0.858925	0.862031	0.864274	0.87016	0.862442	0.870033	0.85378	0.858628	0.865918	0.86034	0.861839	0.859354	0.860807	0.864704	0.855522	0.862003	0.858494	0.862091	0.859092	0.859326	0.857633	0.870192	0.854897	0.849665	0.855871	0.853391	1.18006	1.14036	1.13585	1.12857	0.862283	0.856354	0.860767	0.85506
3900	0.866641	0.86662	0.863083	0.867064	0.864813	0.867028	0.863705	0.87728	0.858228	0.861216	0.868023	0.86251	0.864252	0.86137	0.862398	0.864104	0.861356	0.86221	0.863764	0.862053	0.867129	0.856789	0.860743	0.874855	0.8556	0.848464	0.860319	0.857214	1.18278	1.14332	1.13839	1.12612	0.86285	0.854403	0.859431	0.854795
3902	0.86692	0.867885	0.8702	0.873623	0.866784	0.864109	0.865433	0.884399	0.863195	0.865089	0.86889	0.864555	0.865102	0.86397	0.863361	0.863511	0.861198	0.862652	0.863566	0.862651	0.862487	0.858802	0.859787	0.875936	0.851979	0.852948	0.855909	0.857904	1.1839	1.14416	1.13919	1.12739	0.862165	0.85282	0.858337	0.853988
3904	0.868441	0.867291	0.869412	0.873679	0.865863	0.863534	0.864165	0.879262	0.862913	0.863034	0.864974	0.863678	0.862094	0.865018	0.858589	0.864558	0.855192	0.862082	0.861147	0.865035	0.854965	0.862206	0.856458	0.876231	0.850264	0.854688	0.853053	0.857999	1.18038	1.14166	1.13571	1.1281	0.861852	0.852303	0.855228	0.85489
3906	0.869314	0.866094	0.867451	0.872257	0.864713	0.863289	0.862345	0.874298	0.861545	0.860308	0.86199	0.862639	0.860016	0.865675	0.854518	0.865162	0.853773	0.862675	0.861706	0.866174	0.854635	0.86011	0.856448	0.873995	0.850503	0.849639	0.858446	0.854511	1.17798	1.13977	1.12603	1.12773	0.862918	0.851371	0.851509	0.854394
3908	0.868577	0.865212	0.869062	0.869413	0.865232	0.862923	0.861529	0.876451	0.860236	0.860821	0.861815	0.86143	0.861648	0.864657	0.85817	0.861014	0.855074	0.863448	0.8624	0.864144	0.855008	0.855886	0.857023	0.871848	0.849675	0.847552	0.861258	0.851554	1.17799	1.14093	1.12141	1.12617	0.863965	0.8452	0.847107	0.850789
3910	0.867098	0.863966	0.870837	0.866201	0.865041	0.862984	0.861157	0.878084	0.859058	0.861344	0.861199	0.860334	0.862504	0.863467	0.861606	0.858287	0.853988	0.862183	0.860982	0.861956	0.856329	0.852171	0.857991	0.872113	0.845468	0.846329	0.856346	0.850907	1.17754	1.14256	1.11775	1.12168	0.861791	0.844338	0.845049	0.849093
3912	0.86198	0.862138	0.865482	0.865041	0.861786	0.860273	0.859117	0.873632	0.855158	0.8598	0.857331	0.860269	0.859346	0.862905	0.857234	0.860571	0.849887	0.859039	0.85807	0.855952	0.858327	0.848394	0.857396	0.873048	0.845759	0.84649	0.853265	0.849876	1.1747	1.13532	1.11854	1.12193	0.857179	0.851945	0.846377	0.8489
3914	0.858463	0.861087	0.858224	0.864168	0.859118	0.859109	0.857743	0.871316	0.852755	0.858654	0.854982	0.860436	0.857793	0.861924	0.853546	0.86208	0.85165	0.858795	0.859222	0.853678	0.854451	0.851946	0.858202	0.874534	0.851735	0.849312	0.849965	0.849384	1.17317	1.12814	1.12401	1.12799	0.861803	0.856539	0.848103	0.851019
3916	0.861677	0.861558	0.858039	0.862741	0.860535	0.861799	0.862413	0.874299	0.854635	0.855403	0.858551	0.861511	0.860236	0.859624	0.855763	0.860916	0.858776	0.858517	0.861171	0.858002	0.849809	0.857232	0.860277	0.875942	0.853711	0.85228	0.849671	0.849443	1.17529	1.12858	1.12751	1.13023	0.872031	0.861127	0.854564	0.858358
3918	0.864989	0.862015	0.859653	0.861823	0.862823	0.863787	0.865711	0.877072	0.85632	0.853923	0.861808	0.862961	0.862365	0.858829	0.857796	0.859972	0.861324	0.860482	0.863618	0.862365	0.8524	0.85921	0.864435	0.876639	0.854072	0.857832	0.855994	0.854857	1.17514	1.12843	1.13051	1.12727	0.868822	0.861992	0.856506	0.859495
3920	0.867164	0.867305	0.864058	0.867121	0.86477	0.867383	0.866667	0.880676	0.861039	0.862406	0.866677	0.862432	0.864958	0.864273	0.859403	0.861907	0.863612	0.866355	0.867145	0.86947	0.856018	0.860742	0.869998	0.877508	0.851942	0.858249	0.857575	0.85835	1.1681	1.12661	1.12774	1.12393	0.858417	0.857102	0.850429	0.851038
3922	0.868069	0.870452	0.86794	0.870407	0.865129	0.868194	0.866575	0.881737	0.862892	0.867316	0.867873	0.861466	0.864721	0.866749	0.860089	0.862698	0.859532	0.866215	0.861265	0.870035	0.853209	0.85727	0.863047	0.875392	0.847247	0.849507	0.851592	0.855042	1.16297	1.12323	1.12059	1.11848	0.854058	0.852744	0.84514	0.846934
3924	0.862529	0.864924	0.86093	0.863046	0.859548	0.860113	0.860888	0.872806	0.853718	0.86005	0.858775	0.8565	0.858893	0.858595	0.855512	0.859326	0.849179	0.863227	0.85174	0.859147	0.849212	0.852878	0.850552	0.871527	0.843531	0.842764	0.848872	0.851642	1.15799	1.11958	1.11316	1.11429	0.848852	0.84556	0.835576	0.844109
3926	0.857929	0.859899	0.852966	0.856554	0.855732	0.8544	0.85651	0.866851	0.847065	0.853023	0.852918	0.852266	0.854791	0.853433	0.852399	0.855637	0.845736	0.857793	0.849572	0.851585	0.846076	0.845946	0.850435	0.863024	0.839585	0.834718	0.849308	0.846591	1.15719	1.11834	1.10403	1.10603	0.848018	0.842981	0.834089	0.842918
3928	0.854441	0.856788	0.851298	0.850802	0.856635	0.85247	0.851354	0.863467	0.844082	0.845459	0.849758	0.847069	0.850012	0.849833	0.853132	0.847215	0.84346	0.851185	0.847562	0.844831	0.84522	0.839269	0.853149	0.854806	0.838935	0.832863	0.849187	0.844032	1.15939	1.11684	1.10512	1.10584	0.848634	0.843432	0.840705	0.843634
3930	0.852924	0.855021	0.850785	0.847268	0.856889	0.851577	0.849214	0.863185	0.844106	0.842545	0.848707	0.845618	0.848426	0.848224	0.853	0.843633	0.843576	0.850866	0.847646	0.84372	0.846041	0.841286	0.850809	0.856292	0.839918	0.839623	0.847546	0.841785	1.15971	1.11527	1.10817	1.11386	0.85368	0.845053	0.843206	0.843187
3932	0.854698	0.85419	0.850452	0.850546	0.854544	0.85189	0.849855	0.866222	0.848942	0.846485	0.852037	0.845751	0.849602	0.850318	0.849796	0.847285	0.84541	0.852551	0.849694	0.847676	0.846787	0.844777	0.847342	0.858298	0.841241	0.84226	0.846773	0.841035	1.15646	1.11759	1.10444	1.11433	0.86095	0.8463	0.842964	0.839627
3934	0.855373	0.852683	0.850581	0.852723	0.853506	0.85258	0.851739	0.86667	0.851431	0.848532	0.853202	0.846488	0.850231	0.85039	0.848248	0.8485	0.846991	0.853858	0.852724	0.8483	0.846805	0.844257	0.850889	0.864154	0.843234	0.841186	0.848159	0.841446	1.15541	1.11856	1.09946	1.11122	0.860796	0.845418	0.844186	0.839801
3936	0.855623	0.849287	0.852161	0.853258	0.852731	0.853495	0.854964	0.862776	0.849343	0.848978	0.848849	0.847213	0.851848	0.847675	0.850185	0.848009	0.849415	0.855676	0.854646	0.84753	0.847591	0.843189	0.854564	0.868816	0.843225	0.840833	0.848637	0.842601	1.15355	1.11396	1.10116	1.10772	0.858357	0.843149	0.845656	0.843437
3938	0.855861	0.84817	0.852498	0.853394	0.853168	0.852835	0.855325	0.861954	0.8483	0.849451	0.848041	0.847952	0.850845	0.846185	0.850755	0.847907	0.8457	0.853358	0.848699	0.846965	0.85031	0.848228	0.851407	0.863279	0.843154	0.838507	0.847274	0.842355	1.15155	1.1101	1.10403	1.10171	0.854485	0.843256	0.841141	0.843611
3940	0.855837	0.848934	0.850795	0.852299	0.855833	0.848213	0.852251	0.864302	0.849468	0.850092	0.850972	0.847544	0.84623	0.844281	0.850095	0.85006	0.838996	0.849941	0.840456	0.846739	0.849093	0.85092	0.848668	0.858177	0.840575	0.836172	0.843503	0.841954	1.1494	1.1087	1.09996	1.09864	0.850015	0.842456	0.8307	0.840641
3942	0.855365	0.849966	0.849648	0.851381	0.853991	0.845931	0.849725	0.863195	0.849675	0.849064	0.850296	0.84729	0.845251	0.84341	0.848678	0.848431	0.839677	0.849374	0.839682	0.845875	0.843927	0.839917	0.849115	0.854111	0.836322	0.833779	0.835117	0.840745	1.14655	1.10802	1.09492	1.09506	0.847378	0.836385	0.828856	0.839778
3944	0.852969	0.851978	0.847352	0.849136	0.843195	0.843066	0.844614	0.858536	0.847251	0.844157	0.845758	0.846154	0.845353	0.842715	0.843844	0.84145	0.841766	0.848437	0.841123	0.845907	0.842575	0.834151	0.848537	0.852281	0.832459	0.831239	0.831312	0.837216	1.13871	1.10502	1.09335	1.0949	0.846136	0.826849	0.829651	0.840557
3946	0.850814	0.851425	0.84532	0.846588	0.839826	0.843107	0.842069	0.85744	0.844136	0.840252	0.844399	0.842691	0.842645	0.842278	0.841542	0.84052	0.836577	0.846251	0.838011	0.843893	0.841568	0.836702	0.842014	0.851636	0.828654	0.827942	0.829063	0.827895	1.13581	1.1028	1.09261	1.09617	0.847002	0.830017	0.832617	0.838402
3948	0.846884	0.845346	0.839222	0.841874	0.841867	0.846132	0.839412	0.857122	0.837606	0.834524	0.844185	0.834164	0.837486	0.841495	0.838106	0.84365	0.832413	0.844707	0.83443	0.838815	0.839867	0.838074	0.836913	0.850651	0.830358	0.831339	0.829879	0.827293	1.1342	1.10273	1.09503	1.09854	0.847491	0.836974	0.836839	0.835278
3950	0.845078	0.84225	0.838059	0.840335	0.842868	0.846498	0.838574	0.854383	0.835193	0.834237	0.842566	0.832537	0.838663	0.841937	0.837414	0.844801	0.836527	0.840851	0.838368	0.839183	0.836524	0.838146	0.833944	0.852446	0.831903	0.838071	0.832686	0.832874	1.13725	1.10026	1.09724	1.10034	0.845823	0.837514	0.835709	0.834412
3952	0.84402	0.838483	0.845436	0.840769	0.842811	0.845195	0.839934	0.849688	0.833983	0.8376	0.840979	0.835192	0.842922	0.842339	0.837848	0.844737	0.839796	0.838362	0.840367	0.841152	0.838025	0.836885	0.833409	0.85276	0.828114	0.835608	0.834135	0.83247	1.1411	1.0928	1.09537	1.0968	0.843479	0.83672	0.832484	0.833189
3954	0.842767	0.837133	0.847639	0.841387	0.841927	0.843519	0.838916	0.849906	0.832612	0.838519	0.840153	0.83734	0.842928	0.841948	0.839412	0.842917	0.836132	0.840592	0.834138	0.83706	0.843874	0.832333	0.836515	0.85082	0.823855	0.829826	0.834434	0.828657	1.13505	1.089	1.09086	1.09181	0.835106	0.829974	0.827697	0.824982
3956	0.841022	0.835164	0.844761	0.841698	0.840567	0.841216	0.835611	0.85201	0.830613	0.838675	0.83884	0.839128	0.84086	0.841257	0.842489	0.8383	0.832115	0.840129	0.829187	0.831125	0.841281	0.829128	0.835359	0.847729	0.819593	0.823298	0.828726	0.825685	1.12563	1.08314	1.07956	1.08509	0.829455	0.822227	0.822109	0.815927
3958	0.836323	0.833045	0.840659	0.837498	0.836664	0.83646	0.831444	0.849706	0.828779	0.835315	0.83542	0.83327	0.833208	0.836555	0.839462	0.833353	0.825773	0.830858	0.827666	0.82929	0.831162	0.824491	0.824439	0.839544	0.816091	0.81591	0.819519	0.822511	1.11866	1.08181	1.07333	1.07858	0.826651	0.817748	0.818025	0.814981
3960	0.829054	0.828619	0.832114	0.827071	0.829933	0.829966	0.826481	0.845084	0.825502	0.828009	0.828993	0.823018	0.822541	0.828163	0.831496	0.827131	0.82128	0.825632	0.827997	0.827658	0.825497	0.822168	0.819267	0.835536	0.814711	0.815402	0.820514	0.817957	1.11256	1.07935	1.07138	1.07067	0.825979	0.81397	0.815015	0.815378
3962	0.826996	0.826632	0.828387	0.823179	0.824974	0.828871	0.826986	0.837497	0.821737	0.823968	0.821904	0.820719	0.819288	0.823036	0.825653	0.82583	0.816522	0.820677	0.825529	0.821741	0.81969	0.820456	0.818881	0.830762	0.81321	0.8163	0.822877	0.811733	1.11022	1.07906	1.0696	1.0644	0.826944	0.815146	0.820912	0.813944
3964	0.82595	0.825187	0.825312	0.82065	0.81768	0.827467	0.827892	0.827982	0.817329	0.819094	0.813369	0.820251	0.81782	0.818803	0.819736	0.825137	0.814226	0.818896	0.823246	0.814836	0.820304	0.818522	0.819769	0.829375	0.810366	0.814607	0.819953	0.81007	1.1072	1.07878	1.06484	1.06283	0.826354	0.816019	0.825292	0.812266
3966	0.824028	0.823834	0.82276	0.819191	0.816967	0.827523	0.824066	0.831245	0.81915	0.817706	0.816528	0.81815	0.818486	0.816596	0.820014	0.82187	0.818521	0.82056	0.817816	0.812408	0.822419	0.814869	0.820533	0.829765	0.809107	0.813441	0.815776	0.809626	1.10277	1.0734	1.06043	1.06319	0.819622	0.81311	0.819269	0.812894
3968	0.821566	0.822326	0.820058	0.818294	0.817155	0.827649	0.819596	0.836222	0.820923	0.816436	0.821633	0.815837	0.818041	0.814797	0.820885	0.818276	0.81919	0.821353	0.816594	0.810476	0.819301	0.812442	0.819294	0.828281	0.809628	0.811497	0.814681	0.81017	1.09914	1.06384	1.05532	1.06847	0.816064	0.810602	0.814175	0.812642
3970	0.817915	0.822006	0.817914	0.81721	0.817249	0.824333	0.817052	0.834849	0.815201	0.815237	0.821242	0.816801	0.814075	0.815011	0.814891	0.817307	0.812697	0.823811	0.817609	0.811214	0.814161	0.809381	0.819031	0.825594	0.808555	0.810925	0.81333	0.810741	1.09344	1.0573	1.05174	1.06966	0.812979	0.804108	0.808739	0.806968
3972	0.814428	0.821414	0.814345	0.815457	0.816789	0.819734	0.814221	0.832178	0.808722	0.813389	0.81973	0.816844	0.811227	0.813893	0.808011	0.815376	0.807873	0.818694	0.814641	0.810774	0.806676	0.803255	0.81594	0.823924	0.800394	0.809743	0.805415	0.803926	1.08813	1.05142	1.04802	1.05992	0.810941	0.80025	0.80517	0.8036
3974	0.809781	0.814234	0.808078	0.812591	0.808077	0.812878	0.811381	0.824184	0.805004	0.806577	0.814236	0.809029	0.807783	0.80916	0.805612	0.808754	0.801017	0.80262	0.806288	0.802457	0.798377	0.796033	0.808416	0.821183	0.796991	0.805182	0.80018	0.797569	1.08351	1.05081	1.04568	1.05362	0.808083	0.79931	0.803832	0.800267
3976	0.805383	0.806309	0.800702	0.809318	0.801097	0.807396	0.80912	0.817278	0.801948	0.80057	0.810309	0.80336	0.805078	0.805551	0.803527	0.803276	0.80018	0.800057	0.802977	0.799095	0.797759	0.799918	0.807588	0.817737	0.797462	0.797134	0.801847	0.793824	1.08156	1.05109	1.04125	1.0448	0.807299	0.799105	0.802583	0.80102
3978	0.803125	0.80649	0.803747	0.807583	0.805621	0.805564	0.806949	0.815873	0.804596	0.803041	0.807312	0.803523	0.80133	0.805228	0.80521	0.803491	0.802542	0.803619	0.800453	0.801773	0.797624	0.805609	0.808628	0.813446	0.797672	0.794789	0.802456	0.793125	1.08147	1.05024	1.03981	1.04025	0.806899	0.79905	0.796591	0.80746
3980	0.802751	0.807776	0.807599	0.806292	0.809029	0.804186	0.805542	0.815487	0.806547	0.804892	0.805213	0.803456	0.800038	0.804799	0.806647	0.803254	0.801825	0.803362	0.798555	0.803095	0.797536	0.805987	0.804787	0.812574	0.796575	0.798109	0.803112	0.79918	1.0802	1.04919	1.03824	1.0386	0.804374	0.798883	0.793229	0.806962
3982	0.80672	0.808119	0.80459	0.805141	0.805849	0.804011	0.804108	0.811599	0.804662	0.80261	0.804042	0.802633	0.802154	0.804109	0.80398	0.799329	0.797575	0.801734	0.797879	0.802761	0.796281	0.804396	0.79897	0.81193	0.794576	0.797226	0.800995	0.801179	1.07414	1.04484	1.0368	1.03683	0.79994	0.799442	0.791142	0.797055
3984	0.808012	0.806903	0.801782	0.804252	0.801843	0.802693	0.802127	0.809123	0.801535	0.800521	0.802203	0.801604	0.800627	0.802946	0.80238	0.796751	0.794204	0.801197	0.796794	0.800019	0.790862	0.798396	0.797032	0.808937	0.790465	0.790844	0.791124	0.790928	1.06936	1.04093	1.03373	1.03096	0.795163	0.797793	0.786859	0.790494
3986	0.800341	0.800959	0.799679	0.801695	0.795244	0.797147	0.796959	0.809495	0.791768	0.797986	0.794862	0.797312	0.793068	0.797243	0.80016	0.793035	0.788478	0.800974	0.794096	0.792625	0.787386	0.792875	0.794433	0.804662	0.787243	0.786059	0.785123	0.784381	1.06115	1.03348	1.02991	1.02411	0.789493	0.793966	0.777898	0.781155
3988	0.795408	0.796281	0.797187	0.79791	0.791568	0.793871	0.792322	0.80814	0.787027	0.795461	0.789862	0.791857	0.78721	0.793642	0.796784	0.791028	0.783794	0.79835	0.78785	0.78726	0.787865	0.786983	0.787624	0.798004	0.783483	0.782141	0.780087	0.781226	1.05603	1.02737	1.02625	1.01379	0.787996	0.78849	0.777662	0.77949
3990	0.790608	0.789637	0.790442	0.787842	0.788108	0.791121	0.784787	0.80135	0.7871	0.788508	0.785008	0.781202	0.779842	0.7878	0.786111	0.787462	0.779456	0.793856	0.782573	0.779625	0.789415	0.783104	0.782388	0.793754	0.781959	0.780705	0.7799	0.781963	1.04828	1.02059	1.01896	1.0136	0.787461	0.777822	0.781692	0.780539
3992	0.789587	0.786685	0.785523	0.784131	0.785318	0.789657	0.782561	0.798491	0.785721	0.784393	0.783824	0.77746	0.779593	0.785642	0.782421	0.784686	0.781763	0.790521	0.783528	0.778697	0.789565	0.778839	0.781801	0.796607	0.780398	0.777198	0.781184	0.781584	1.0451	1.01607	1.00985	1.01523	0.785656	0.777347	0.780258	0.779087
3994	0.791656	0.78549	0.781986	0.787975	0.780026	0.789532	0.783186	0.796381	0.781463	0.781109	0.785602	0.778364	0.783597	0.785683	0.782388	0.781175	0.783916	0.788752	0.783084	0.779646	0.787893	0.776679	0.780544	0.797679	0.776893	0.77599	0.778263	0.779278	1.04224	1.01084	1.00054	1.00822	0.783692	0.779387	0.776897	0.775625
3996	0.790641	0.783638	0.780748	0.78669	0.778949	0.786097	0.782194	0.793941	0.779902	0.77859	0.784159	0.776323	0.782394	0.78299	0.781083	0.78009	0.776036	0.785402	0.778171	0.777912	0.783177	0.776672	0.777068	0.79395	0.77423	0.775761	0.771457	0.774357	1.04211	1.00813	0.99568	0.998323	0.779188	0.778696	0.774748	0.774288
3998	0.785641	0.780161	0.779131	0.776307	0.779359	0.777442	0.780171	0.78975	0.781056	0.775339	0.780758	0.77071	0.777663	0.777318	0.777053	0.779311	0.767998	0.780707	0.774877	0.774468	0.778027	0.775162	0.774964	0.790768	0.769067	0.771405	0.768154	0.771083	1.04178	1.00826	0.997459	0.995028	0.775311	0.776975	0.772861	0.773739
4000	0.778212	0.777277	0.775978	0.772181	0.776963	0.773585	0.77784	0.786966	0.776736	0.773395	0.776731	0.770266	0.773805	0.773731	0.77321	0.776586	0.765691	0.773218	0.769148	0.768573	0.769155	0.769577	0.773722	0.786904	0.763439	0.764768	0.764921	0.766999	1.03242	1.00267	0.997001	0.99271	0.771449	0.772404	0.76646	0.768209

## Sheet: 785nm
	0	0	0	0	0.100000000000000	0.100000000000000	0.100000000000000	0.100000000000000	0.250000000000000	0.250000000000000	0.250000000000000	0.250000000000000	0.500000000000000	0.500000000000000	0.500000000000000	0.500000000000000	1	1	1	1	5	5	5	5	10	10	10	10	20	20	20	20	40	40	40	40
466	17.7172	17.8585	17.964	18.1922	18.23	18.2182	17.9902	17.9417	18.0523	18.0692	17.8692	18.0633	17.9237	17.8395	17.7989	17.6064	17.6675	17.7988	17.9427	17.7076	17.808	17.6429	17.8122	17.7245	17.6467	17.6224	17.6142	17.6167	17.378	17.3387	17.2738	17.4061	16.9538	16.8457	16.9309	17.0678
468	17.8218	17.9369	18.0459	18.3113	18.3331	18.3269	18.0781	18.0282	18.1457	18.1993	17.9599	18.133	18.0206	17.9375	17.8956	17.7081	17.7479	17.8871	18.0643	17.7714	17.9086	17.7325	17.9124	17.8074	17.7185	17.7245	17.7132	17.7158	17.4748	17.4379	17.3755	17.4951	17.0123	16.896	16.9958	17.1544
470	17.9873	18.0587	18.1558	18.4009	18.4338	18.4264	18.1855	18.1442	18.2646	18.2985	18.1036	18.2241	18.1253	18.0812	18.0155	17.8384	17.885	17.9789	18.1633	17.8987	17.9953	17.8602	18.0265	17.9454	17.8074	17.8432	17.8366	17.8144	17.6054	17.582	17.5151	17.6368	17.1185	17.0232	17.0972	17.2368
472	18.16	18.1932	18.2927	18.5209	18.571	18.55	18.3609	18.2967	18.4613	18.4339	18.2649	18.4014	18.2714	18.2567	18.1597	17.9443	18.051	18.1054	18.2848	18.0579	18.1245	18.0113	18.1696	18.1652	17.9637	18.0352	18.0145	17.9771	17.7272	17.7013	17.6311	17.7884	17.2689	17.1818	17.2246	17.3615
474	18.2864	18.3118	18.428	18.6666	18.7422	18.6998	18.5388	18.4271	18.6571	18.5737	18.3978	18.5899	18.4119	18.3877	18.2893	18.049	18.1833	18.2228	18.4303	18.1746	18.2537	18.1383	18.2984	18.3402	18.1129	18.1992	18.1534	18.1254	17.8426	17.8394	17.7663	17.8915	17.3883	17.2799	17.3178	17.4676
476	18.4207	18.494	18.5935	18.7981	18.8845	18.8362	18.6907	18.571	18.811	18.7319	18.561	18.7573	18.5508	18.5249	18.4435	18.178	18.3293	18.3844	18.5943	18.3123	18.3982	18.2946	18.4755	18.4735	18.2482	18.3063	18.2648	18.2608	17.979	18.0064	17.9297	18.0109	17.5063	17.3825	17.4364	17.5722
478	18.5685	18.6902	18.774	18.9736	19.0525	19.0212	18.8715	18.7372	18.9689	18.9438	18.7272	18.9551	18.7273	18.6747	18.6197	18.332	18.4805	18.5802	18.7754	18.4708	18.581	18.471	18.6783	18.6188	18.4093	18.4242	18.4041	18.4277	18.1254	18.1532	18.0916	18.1479	17.628	17.5014	17.5699	17.7013
480	18.7781	18.917	18.9795	19.1804	19.2656	19.2386	19.0568	18.9404	19.1314	19.1592	18.9244	19.1574	18.9347	18.8544	18.8175	18.5804	18.6594	18.7729	18.9624	18.6692	18.7726	18.6681	18.8664	18.7848	18.576	18.5653	18.5593	18.5999	18.3286	18.3503	18.3135	18.3446	17.758	17.6636	17.7103	17.8352
482	19.0649	19.2189	19.2544	19.429	19.5069	19.4734	19.2962	19.2416	19.3672	19.3998	19.2004	19.4039	19.2401	19.1251	19.0764	18.8601	18.9436	19.0397	19.199	18.9545	19.0349	18.9334	19.1034	19.044	18.82	18.8288	18.8121	18.834	18.5732	18.5792	18.5378	18.6282	17.9597	17.9129	17.9222	18.045
484	19.3456	19.5091	19.5437	19.7573	19.8332	19.79	19.6005	19.5553	19.6852	19.6719	19.477	19.6901	19.5907	19.4311	19.3616	19.1222	19.2539	19.3344	19.49	19.2496	19.3358	19.2094	19.3623	19.3405	19.1304	19.1648	19.1209	19.1073	18.8035	18.8277	18.7287	18.9007	18.1748	18.1456	18.1319	18.2774
486	19.6466	19.8013	19.8409	20.0958	20.19	20.121	19.9071	19.8376	20.0077	19.9641	19.7904	19.9748	19.8949	19.7378	19.6872	19.4122	19.5621	19.6392	19.7827	19.555	19.6199	19.505	19.6452	19.6259	19.428	19.4589	19.4191	19.379	19.0382	19.1495	18.9458	19.168	18.3998	18.3501	18.3306	18.4778
488	19.9739	20.1159	20.1763	20.447	20.5489	20.4558	20.2743	20.1487	20.3381	20.3186	20.1407	20.3081	20.1988	20.0628	20.073	19.7207	19.8902	19.9938	20.1012	19.8914	19.9346	19.8421	19.9805	19.9564	19.735	19.7457	19.7535	19.6894	19.2983	19.4693	19.1869	19.447	18.6701	18.5675	18.565	18.7253
490	20.3227	20.4494	20.5309	20.8256	20.9458	20.8294	20.6646	20.4929	20.6902	20.6912	20.4773	20.6698	20.5201	20.4024	20.445	20.0846	20.2345	20.3412	20.4475	20.2219	20.2683	20.1826	20.3241	20.3036	20.0537	20.0421	20.0833	20.0074	19.6357	19.7797	19.521	19.7238	18.9194	18.7836	18.8023	18.9723
492	20.7665	20.86	20.9499	21.1962	21.3249	21.2013	21.039	20.9249	21.0724	21.0792	20.8644	21.0549	20.8898	20.8267	20.8099	20.479	20.6399	20.7353	20.8204	20.5818	20.6669	20.617	20.7296	20.7014	20.4102	20.3888	20.4111	20.3501	20.0508	20.0981	19.9061	20.0662	19.1874	19.0968	19.107	19.2396
494	21.186	21.26	21.3723	21.6248	21.7129	21.6132	21.4512	21.3596	21.5093	21.4944	21.24	21.4922	21.3059	21.2572	21.1643	20.8304	21.0293	21.134	21.2176	20.9238	21.1278	21.0452	21.1437	21.1286	20.817	20.7882	20.7667	20.7282	20.3961	20.3616	20.2109	20.3891	19.4562	19.4105	19.413	19.5419
496	21.5372	21.6167	21.6996	22.0042	22.0957	21.9964	21.7837	21.6801	21.8915	21.8254	21.5809	21.852	21.6417	21.5775	21.4865	21.199	21.36	21.4366	21.5568	21.2172	21.4769	21.3466	21.4567	21.4594	21.1545	21.1015	21.0717	21.0234	20.653	20.643	20.4983	20.6496	19.6599	19.6115	19.6228	19.7501
498	21.8672	21.9737	21.9826	22.236	22.3486	22.2654	22.0273	21.9751	22.1657	22.107	21.9443	22.1412	21.9317	21.8815	21.8275	21.491	21.6998	21.7407	21.8427	21.5339	21.767	21.6413	21.7607	21.7669	21.4381	21.3578	21.3957	21.2742	20.8431	20.8677	20.7032	20.9235	19.8642	19.8024	19.8272	19.9295
500	22.0237	22.1441	22.159	22.4487	22.5402	22.5075	22.2403	22.1704	22.3657	22.3342	22.1309	22.3881	22.1862	22.0911	22.0511	21.5847	21.9056	21.9538	22.0789	21.7322	21.9946	21.82	21.9666	22.0002	21.642	21.5697	21.6688	21.4728	20.9183	20.9259	20.7551	21.0664	20.0047	19.9161	19.9588	20.0742
502	22.0449	22.1271	22.1952	22.5583	22.6612	22.6477	22.3292	22.219	22.4316	22.3918	22.1184	22.4676	22.287	22.1357	22.0782	21.6062	21.9496	21.9883	22.1786	21.7738	22.0499	21.8375	21.9924	22.0414	21.675	21.6279	21.7258	21.5266	20.929	20.9193	20.772	21.0728	20.0239	19.9273	19.957	20.0976
504	22.0254	22.066	22.1553	22.4955	22.6518	22.6153	22.3127	22.2005	22.3861	22.3339	22.0538	22.4131	22.2683	22.1059	22.0182	21.5939	21.9407	21.9585	22.1342	21.7778	22.0039	21.8141	21.9545	21.972	21.6247	21.5817	21.6571	21.5123	20.9095	20.8895	20.7684	21.0388	19.9908	19.906	19.8955	20.0243
506	21.9631	21.9959	22.0735	22.3292	22.523	22.4584	22.248	22.1278	22.2916	22.2261	21.9697	22.3091	22.1903	22.0283	21.925	21.5109	21.8763	21.8922	22.0109	21.739	21.9156	21.7635	21.8866	21.8673	21.5475	21.4994	21.5521	21.4687	20.8459	20.7927	20.7035	20.9728	19.934	19.8639	19.8347	19.9256
508	21.764	21.8327	21.9011	22.1545	22.3467	22.265	22.1218	21.9462	22.1561	22.0675	21.793	22.1683	22.0462	21.8481	21.7653	21.3336	21.6858	21.7347	21.8321	21.5625	21.7577	21.6101	21.7194	21.7046	21.4265	21.3814	21.4076	21.3483	20.7013	20.5838	20.5617	20.795	19.8073	19.7274	19.7227	19.8145
510	21.4915	21.5977	21.6438	21.9089	22.1044	22.0108	21.8251	21.6699	21.8996	21.7997	21.5531	21.8756	21.748	21.5763	21.5192	21.1221	21.4082	21.481	21.5765	21.2888	21.458	21.3648	21.4475	21.4244	21.1882	21.1455	21.137	21.0742	20.5066	20.3771	20.3979	20.5608	19.5983	19.526	19.548	19.639
512	21.1924	21.3204	21.358	21.5996	21.7521	21.6849	21.4671	21.3832	21.5727	21.4955	21.2886	21.5295	21.4111	21.2915	21.2329	20.8313	21.1135	21.2076	21.2834	21.0067	21.1371	21.0879	21.1747	21.1244	20.9041	20.8699	20.8499	20.7735	20.2573	20.1395	20.1401	20.3358	19.3885	19.3305	19.3682	19.464
514	20.8031	20.9274	21.0078	21.296	21.3973	21.3523	21.1303	21.0231	21.2299	21.1438	20.9265	21.1872	21.0715	20.9329	20.8572	20.4734	20.7369	20.8692	20.9726	20.6451	20.8155	20.6927	20.8437	20.7928	20.5645	20.5694	20.5394	20.465	19.9585	19.8526	19.8197	20.0544	19.1444	19.0642	19.1064	19.2552
516	20.4152	20.5212	20.6268	20.9585	21.0351	20.9821	20.7675	20.6335	20.8579	20.739	20.5491	20.8073	20.6983	20.5382	20.4555	20.1152	20.3365	20.4899	20.632	20.2626	20.4578	20.2665	20.4765	20.4246	20.1727	20.2219	20.1805	20.1205	19.659	19.5658	19.5202	19.7542	18.8806	18.7841	18.8157	18.995
518	20.0454	20.1397	20.2442	20.6022	20.657	20.601	20.4044	20.27	20.4836	20.3635	20.1904	20.4386	20.332	20.1543	20.0941	19.7247	19.9596	20.1204	20.2802	19.9088	20.0999	19.8832	20.1187	20.0678	19.8153	19.8723	19.8419	19.7904	19.3346	19.2418	19.2003	19.4155	18.6213	18.5274	18.55	18.7368
520	19.6762	19.7519	19.8527	20.2265	20.2934	20.2341	20.0236	19.896	20.0994	20.0084	19.8149	20.0571	19.9442	19.7391	19.7309	19.3541	19.5879	19.7264	19.9098	19.5493	19.7202	19.4977	19.7302	19.6893	19.4677	19.4842	19.4941	19.4383	18.9952	18.9311	18.8878	19.0317	18.3275	18.248	18.2664	18.4219
522	19.3516	19.411	19.4948	19.8212	19.9251	19.853	19.6405	19.5375	19.7246	19.669	19.4747	19.6728	19.5581	19.3677	19.3846	19.0413	19.2507	19.3596	19.5503	19.2257	19.3564	19.1623	19.3798	19.3288	19.1307	19.1056	19.1577	19.0954	18.693	18.6663	18.5896	18.7241	18.0514	18.0011	18.0163	18.1237
524	19.0564	19.1076	19.1755	19.4657	19.5811	19.4961	19.3121	19.2154	19.3904	19.3536	19.1539	19.3382	19.2268	19.0802	19.0641	18.752	18.9428	19.059	19.2253	18.9433	19.0493	18.8888	19.0966	19.0247	18.8116	18.8092	18.8644	18.8131	18.4226	18.3981	18.2873	18.4794	17.8137	17.7827	17.8058	17.9144
526	18.7685	18.8179	18.8778	19.165	19.2723	19.1806	19.0226	18.9206	19.0875	19.041	18.8434	19.0317	18.9302	18.8254	18.7593	18.469	18.6494	18.7825	18.907	18.6731	18.7689	18.6342	18.8298	18.7472	18.4914	18.553	18.5803	18.5594	18.1684	18.1432	18.0149	18.2449	17.589	17.5639	17.6016	17.7227
528	18.4718	18.5258	18.595	18.8845	18.9697	18.8819	18.7486	18.6397	18.7976	18.7495	18.5472	18.7468	18.6521	18.5649	18.4752	18.1493	18.3661	18.5047	18.5979	18.3916	18.5009	18.362	18.565	18.4867	18.2076	18.3076	18.3082	18.3151	17.9036	17.8714	17.7484	17.9931	17.3822	17.3363	17.3956	17.5266
530	18.1505	18.2106	18.3011	18.6106	18.6834	18.5942	18.4571	18.3302	18.4796	18.4671	18.2169	18.4586	18.3692	18.2465	18.1748	17.8244	18.0611	18.1791	18.2937	18.0587	18.2112	18.0196	18.2584	18.1986	17.9428	18.0297	18.0289	18.0342	17.6238	17.5901	17.49	17.6899	17.1417	17.0459	17.1264	17.2753
532	17.8648	17.9331	18.0265	18.3061	18.3816	18.2862	18.1406	18.0377	18.1483	18.1841	17.9296	18.1539	18.0771	17.9341	17.8917	17.5549	17.7756	17.859	17.9999	17.7591	17.9133	17.7064	17.9599	17.9034	17.6839	17.7332	17.7437	17.7296	17.386	17.3514	17.2664	17.4262	16.9027	16.7909	16.8696	17.0021
534	17.6104	17.6979	17.8043	18.0363	18.094	18.0102	17.8921	17.8103	17.8932	17.9471	17.7145	17.9203	17.8416	17.698	17.6818	17.2997	17.536	17.6231	17.7749	17.5463	17.6849	17.5026	17.722	17.6647	17.4731	17.5127	17.5098	17.4958	17.174	17.1076	17.0238	17.2179	16.7223	16.6383	16.6983	16.8128
536	17.376	17.4713	17.6041	17.8328	17.898	17.8105	17.6938	17.5937	17.7116	17.7208	17.5125	17.7273	17.6454	17.4922	17.5072	17.1216	17.3069	17.4108	17.5986	17.3467	17.4773	17.3249	17.4689	17.429	17.2701	17.3218	17.2645	17.2749	16.9835	16.9132	16.8314	17.0095	16.5433	16.496	16.5294	16.6383
538	17.252	17.3326	17.4473	17.6329	17.7261	17.6317	17.5187	17.4317	17.5738	17.5292	17.38	17.5533	17.4749	17.3469	17.3728	17.0484	17.1441	17.2536	17.4434	17.2117	17.3072	17.1962	17.2882	17.2475	17.1007	17.1624	17.0668	17.0894	16.8563	16.8149	16.7325	16.8839	16.4146	16.4053	16.4074	16.5001
540	17.1855	17.2542	17.3331	17.5057	17.5978	17.5223	17.4246	17.317	17.496	17.4314	17.275	17.4619	17.3595	17.2488	17.2589	16.979	17.0412	17.1643	17.3394	17.1249	17.2185	17.0957	17.2129	17.1751	17.0124	17.0791	17.009	16.9958	16.7655	16.7393	16.6539	16.8095	16.3568	16.3495	16.3256	16.4493
542	17.1419	17.1986	17.2376	17.4456	17.5214	17.4939	17.3661	17.2161	17.4414	17.3691	17.1837	17.3939	17.2548	17.1735	17.1533	16.921	16.9633	17.0965	17.2676	17.0546	17.1413	17.004	17.1524	17.1367	16.9398	17.0016	16.9918	16.9047	16.7094	16.6969	16.6143	16.7513	16.3096	16.2957	16.2436	16.4282
544	17.1196	17.1755	17.1861	17.4088	17.4523	17.4822	17.3254	17.1749	17.3913	17.3396	17.1603	17.3385	17.1869	17.1511	17.0994	16.868	16.9412	17.0672	17.2239	17.0275	17.0979	16.9652	17.123	17.1248	16.9015	16.9504	16.9871	16.8469	16.6839	16.6806	16.613	16.7306	16.2783	16.2754	16.2117	16.4223
546	17.0925	17.1652	17.17	17.4024	17.4244	17.472	17.3086	17.1895	17.35	17.3489	17.1735	17.3027	17.1943	17.1579	17.0787	16.8277	16.9643	17.0742	17.2139	17.0165	17.0942	16.9781	17.1253	17.1321	16.9225	16.9586	16.9919	16.8622	16.6649	16.6709	16.6217	16.7403	16.2614	16.2788	16.2399	16.4071
548	17.0707	17.1606	17.17	17.4185	17.4466	17.4627	17.3012	17.2187	17.3235	17.3694	17.1864	17.2748	17.2364	17.1577	17.0715	16.8333	16.9913	17.0854	17.2269	17.0101	17.0956	16.9995	17.1371	17.1389	16.967	17.0081	17.0004	16.9142	16.6497	16.6614	16.6206	16.754	16.2637	16.2851	16.2796	16.3808
550	17.0697	17.154	17.1754	17.4316	17.4776	17.4559	17.2932	17.2287	17.3171	17.3645	17.1777	17.2642	17.2463	17.1379	17.0805	16.8744	16.9933	17.0806	17.2341	17.0144	17.096	16.9971	17.1393	17.1333	16.9857	17.0366	16.9984	16.9348	16.6513	16.629	16.5979	16.7422	16.28	16.2802	16.286	16.3617
552	17.0708	17.1351	17.1761	17.4155	17.469	17.4376	17.2697	17.2266	17.3135	17.3145	17.1511	17.2667	17.2064	17.1012	17.0933	16.9083	16.974	17.0656	17.2055	17.0301	17.1118	16.9825	17.1394	17.1199	16.9684	17.0136	16.9826	16.8997	16.6536	16.5848	16.5649	16.7042	16.2913	16.2635	16.2737	16.3396
554	17.0453	17.0975	17.1546	17.3653	17.4112	17.3804	17.2171	17.1983	17.2842	17.2318	17.1063	17.262	17.1393	17.0553	17.0761	16.8706	16.9369	17.031	17.1516	17.0212	17.1157	16.9458	17.1226	17.0936	16.9271	16.9638	16.9517	16.8389	16.612	16.5271	16.507	16.6551	16.2744	16.2304	16.2425	16.3021
556	16.9303	16.9902	17.071	17.2879	17.3304	17.2992	17.1316	17.1015	17.2038	17.1365	16.9879	17.2157	17.056	16.9648	16.9932	16.7393	16.8316	16.9518	17.0758	16.9257	17.0462	16.8407	17.0414	17.0193	16.8427	16.888	16.8858	16.7657	16.4973	16.3988	16.3863	16.5543	16.1926	16.1327	16.1545	16.2263
558	16.745	16.8137	16.8958	17.1186	17.206	17.141	16.9648	16.9211	17.0329	16.9767	16.7972	17.0342	16.9007	16.7933	16.828	16.5723	16.6554	16.7983	16.9414	16.7412	16.84	16.6581	16.8651	16.8225	16.6538	16.7169	16.7148	16.6356	16.3248	16.2375	16.2288	16.3908	16.0199	15.9567	15.9856	16.042
560	16.5264	16.5978	16.6687	16.8461	16.9592	16.8664	16.74	16.6985	16.7839	16.7614	16.5784	16.7746	16.6829	16.5793	16.6141	16.326	16.4528	16.6029	16.7334	16.5287	16.5817	16.4497	16.6526	16.5719	16.4215	16.4837	16.4868	16.4662	16.0916	15.9965	15.9769	16.1878	15.8127	15.751	15.78	15.8119
562	16.1898	16.2529	16.3299	16.5457	16.649	16.5577	16.4549	16.3608	16.4725	16.4662	16.2485	16.4839	16.3906	16.2693	16.2945	15.9645	16.1392	16.2826	16.4266	16.1968	16.2826	16.1362	16.3386	16.2566	16.1358	16.1803	16.1908	16.1878	15.7542	15.6499	15.6278	15.8661	15.5087	15.4226	15.462	15.5141
564	15.794	15.8468	15.9041	16.1518	16.2583	16.1683	16.0242	15.9311	16.0694	16.0518	15.8546	16.0881	15.9758	15.8807	15.8847	15.5811	15.7474	15.8506	16.0111	15.7871	15.8788	15.7402	15.9265	15.8529	15.7353	15.7494	15.7737	15.7354	15.362	15.2864	15.2626	15.4773	15.1	15.0122	15.0566	15.1078
566	15.3665	15.4379	15.4725	15.6917	15.7785	15.7026	15.5468	15.5019	15.6252	15.6065	15.4383	15.6509	15.5233	15.4746	15.4491	15.1799	15.3284	15.4183	15.5575	15.3682	15.4451	15.3193	15.5007	15.4318	15.2906	15.2908	15.3325	15.2708	14.9421	14.8794	14.8536	15.0618	14.6685	14.596	14.6407	14.6867
568	14.8714	14.9776	15.012	15.2254	15.2913	15.2288	15.0787	15.0555	15.1634	15.1423	14.9561	15.1791	15.0431	15.0208	14.956	14.741	14.849	14.9523	15.083	14.8937	14.9721	14.8286	15.0298	14.9599	14.8044	14.8189	14.8697	14.8069	14.4912	14.4309	14.4014	14.5823	14.1878	14.1294	14.1793	14.2294
570	14.3647	14.4896	14.5231	14.7267	14.7863	14.727	14.5871	14.582	14.6725	14.6453	14.4533	14.6607	14.525	14.531	14.4336	14.2495	14.3508	14.4541	14.5807	14.3964	14.4599	14.3158	14.5276	14.4502	14.29	14.3186	14.3752	14.3125	14.0168	13.9579	13.9144	14.0839	13.6856	13.6392	13.6928	13.7355
572	13.8421	13.9615	13.9978	14.2125	14.2646	14.2069	14.0816	14.0641	14.1594	14.1335	13.926	14.1391	14.0074	14.0042	13.902	13.6925	13.8404	13.9296	14.0587	13.8782	13.948	13.7972	13.9983	13.9339	13.7822	13.8114	13.8631	13.8023	13.5024	13.4376	13.3823	13.5649	13.1801	13.1239	13.1855	13.2332
574	13.3066	13.4084	13.4434	13.6723	13.7282	13.6677	13.5479	13.5037	13.6106	13.5929	13.3816	13.5997	13.4767	13.4416	13.3637	13.1455	13.3016	13.3761	13.514	13.3366	13.4203	13.2618	13.4315	13.3924	13.2555	13.2821	13.3119	13.2557	12.9726	12.9185	12.8621	13.0316	12.6556	12.5865	12.6509	12.7081
576	12.7878	12.8792	12.9063	13.1153	13.1699	13.1141	13.0133	12.9596	13.0518	13.0537	12.8664	13.0597	12.9495	12.8987	12.8486	12.6353	12.7617	12.847	12.9748	12.8118	12.8989	12.7468	12.8935	12.8562	12.7275	12.759	12.7666	12.7191	12.462	12.417	12.3659	12.5191	12.1446	12.0812	12.1335	12.1972
578	12.2745	12.3553	12.388	12.5925	12.6384	12.5955	12.5074	12.4382	12.5267	12.5314	12.3679	12.5419	12.4404	12.3744	12.3474	12.1391	12.2196	12.3455	12.4671	12.2905	12.3957	12.2461	12.3916	12.3326	12.2124	12.2572	12.2543	12.22	11.9719	11.9214	11.879	12.0092	11.6506	11.6003	11.6275	11.7121
580	11.7894	11.8589	11.8942	12.0967	12.1497	12.1095	12.0132	11.9407	12.0409	12.0198	11.8902	12.0342	11.9443	11.8751	11.864	11.6665	11.7095	11.8593	11.9832	11.7911	11.8989	11.7624	11.9106	11.8223	11.711	11.7641	11.7582	11.7398	11.5027	11.4552	11.4142	11.522	11.1758	11.1413	11.1433	11.2402
582	11.3425	11.4064	11.4465	11.6315	11.6913	11.65	11.5536	11.4812	11.5933	11.5564	11.4346	11.5666	11.4852	11.4248	11.4149	11.2171	11.2657	11.4037	11.5209	11.3412	11.4308	11.3042	11.4556	11.3625	11.2571	11.3094	11.2987	11.2965	11.0465	11.0043	10.9657	11.0716	10.7394	10.71	10.707	10.8015
584	10.9209	10.9799	11.0345	11.2079	11.2696	11.2252	11.1364	11.047	11.1719	11.1419	10.9935	11.1436	11.059	11.0104	10.9874	10.8018	10.8589	10.9762	11.0758	10.9244	10.9874	10.8594	11.012	10.9414	10.8446	10.8892	10.8647	10.8838	10.6126	10.5825	10.549	10.6442	10.3289	10.2942	10.3028	10.3903
586	10.5355	10.5949	10.6533	10.8108	10.8723	10.8259	10.7487	10.6458	10.7739	10.7575	10.5991	10.7527	10.6606	10.6281	10.5844	10.4236	10.4795	10.5852	10.661	10.5451	10.5778	10.4579	10.6067	10.5551	10.4609	10.5004	10.4646	10.4963	10.2257	10.208	10.1727	10.265	9.94587	9.90764	9.92832	10.0079
588	10.1738	10.2414	10.2938	10.4518	10.5051	10.4626	10.3902	10.2811	10.4121	10.3978	10.2491	10.3997	10.3021	10.2678	10.2099	10.0631	10.1244	10.2246	10.2968	10.1899	10.2187	10.1101	10.2585	10.2074	10.1054	10.1573	10.1198	10.1329	9.88116	9.86362	9.82015	9.93228	9.58765	9.54542	9.57215	9.65833
590	9.84479	9.91589	9.95667	10.1268	10.1744	10.1298	10.0428	9.94877	10.0839	10.053	9.92976	10.0705	9.97373	9.92538	9.86543	9.7371	9.80233	9.88179	9.97212	9.8571	9.88978	9.79403	9.94545	9.88452	9.76972	9.84167	9.81296	9.77954	9.57085	9.55426	9.505	9.63051	9.24951	9.2065	9.23489	9.32785
592	9.568	9.62812	9.66342	9.82627	9.86998	9.81956	9.72408	9.6594	9.78866	9.74658	9.6412	9.7655	9.67905	9.62371	9.56968	9.45328	9.51899	9.58077	9.67926	9.56349	9.59346	9.50326	9.6566	9.59233	9.46944	9.55	9.53204	9.46679	9.28237	9.27208	9.22356	9.35101	8.95972	8.91938	8.94852	9.03283
594	9.32681	9.36005	9.40408	9.55985	9.59702	9.55174	9.45847	9.39963	9.52078	9.48811	9.36844	9.48433	9.40785	9.35822	9.30597	9.20088	9.25124	9.32042	9.41762	9.28203	9.32688	9.21909	9.37282	9.32518	9.20741	9.2723	9.25939	9.20307	9.00901	9.01277	8.96959	9.07759	8.71329	8.66686	8.70197	8.77366
596	9.10997	9.12226	9.16583	9.31426	9.34614	9.31768	9.22743	9.16368	9.26601	9.25925	9.12648	9.22076	9.15474	9.12163	9.07554	8.9804	9.00865	9.08531	9.18567	9.03356	9.07862	8.96725	9.11339	9.07852	8.96804	9.0024	8.99876	8.9646	8.77088	8.78948	8.74611	8.83245	8.49615	8.4434	8.48165	8.53685
598	8.89373	8.91711	8.95236	9.09264	9.11668	9.10553	9.02192	8.95816	9.03823	9.05279	8.92185	9.00087	8.94716	8.90695	8.87978	8.77699	8.81071	8.87464	8.98103	8.83884	8.86128	8.77627	8.9087	8.86614	8.75759	8.7751	8.78449	8.76184	8.57285	8.58667	8.53196	8.62315	8.30598	8.25036	8.28295	8.33045
600	8.67915	8.72934	8.76081	8.89568	8.92394	8.91359	8.82096	8.77184	8.84208	8.84922	8.73574	8.81325	8.77242	8.69938	8.69742	8.59395	8.64232	8.67727	8.78935	8.66397	8.66697	8.61759	8.73367	8.67083	8.57149	8.58143	8.5944	8.58288	8.39876	8.4044	8.34107	8.42779	8.12722	8.07347	8.09359	8.14159
602	8.50688	8.57078	8.59642	8.71008	8.74994	8.72923	8.62918	8.60554	8.66622	8.66417	8.57439	8.6414	8.61287	8.51751	8.53414	8.43077	8.48144	8.50246	8.61221	8.51625	8.49665	8.4725	8.57884	8.49374	8.40886	8.41166	8.42427	8.42369	8.23647	8.23857	8.18254	8.26149	7.96307	7.91576	7.92556	7.97397
604	8.35652	8.41935	8.4467	8.55146	8.59476	8.56892	8.47572	8.45391	8.51613	8.51617	8.41795	8.4945	8.45912	8.36306	8.38631	8.26715	8.30571	8.34532	8.46265	8.37832	8.35437	8.31197	8.43509	8.33604	8.27177	8.27592	8.28591	8.28524	8.07991	8.07189	8.03947	8.11123	7.80744	7.76283	7.76861	7.83215
606	8.22475	8.27547	8.30562	8.41183	8.45685	8.42362	8.34518	8.31586	8.37999	8.37976	8.27007	8.35586	8.30085	8.22443	8.25119	8.12405	8.1413	8.19623	8.32993	8.2437	8.21939	8.15512	8.29682	8.17905	8.14433	8.14984	8.15029	8.14191	7.94458	7.94203	7.92392	7.9751	7.65697	7.61927	7.61817	7.69482
608	8.12101	8.15583	8.18713	8.28704	8.31699	8.2817	8.23142	8.20662	8.26144	8.26094	8.14981	8.23769	8.17337	8.11715	8.1369	8.00988	8.02883	8.08598	8.21496	8.13226	8.10146	8.05204	8.17759	8.05615	8.02622	8.03825	8.03365	8.01726	7.83581	7.8392	7.81443	7.86033	7.54197	7.51012	7.50728	7.57979
610	8.01582	8.035	8.07497	8.19217	8.2	8.17283	8.12725	8.09275	8.16313	8.15248	8.02861	8.14286	8.07637	8.02438	8.01896	7.91207	7.93816	7.99385	8.11741	8.01856	7.99783	7.96028	8.04807	7.9533	7.90477	7.93568	7.92325	7.91337	7.73585	7.74425	7.71169	7.74486	7.44313	7.4048	7.41071	7.47739
612	7.93008	7.93818	7.97787	8.0983	8.09645	8.07562	8.01438	7.98161	8.0671	8.0429	7.93526	8.04741	7.98453	7.94623	7.9113	7.83287	7.8608	7.91217	8.01895	7.91883	7.89852	7.87915	7.93345	7.86106	7.78786	7.82628	7.80457	7.81484	7.65059	7.67269	7.63989	7.65536	7.3548	7.31772	7.32815	7.37772
614	7.85645	7.86835	7.90661	8.01789	8.00265	7.99276	7.93339	7.89541	7.98331	7.96443	7.87435	7.96955	7.90828	7.88424	7.83333	7.75585	7.78805	7.84548	7.93413	7.84073	7.8222	7.81531	7.87467	7.80503	7.71564	7.74612	7.72233	7.74427	7.57735	7.59732	7.57283	7.59387	7.2893	7.25912	7.26487	7.30895
616	7.78049	7.80121	7.8374	7.95141	7.94163	7.93834	7.87372	7.80898	7.90526	7.89644	7.80993	7.89456	7.83136	7.81467	7.76681	7.68804	7.70831	7.75665	7.86159	7.75472	7.74781	7.7416	7.82118	7.74572	7.6544	7.67802	7.65188	7.66998	7.5176	7.52917	7.51599	7.53496	7.22512	7.19657	7.19115	7.24197
618	7.72543	7.75114	7.77807	7.8717	7.8806	7.88493	7.81394	7.7474	7.82294	7.83504	7.76182	7.82272	7.75941	7.75656	7.7169	7.62534	7.6502	7.68157	7.79068	7.692	7.68165	7.6809	7.77594	7.69302	7.59671	7.6178	7.59287	7.60079	7.46749	7.47129	7.46023	7.48775	7.17138	7.1518	7.1371	7.18384
620	7.65574	7.69088	7.71905	7.81298	7.82857	7.83769	7.76758	7.70061	7.75671	7.79155	7.70272	7.77761	7.70576	7.69661	7.67241	7.55656	7.58696	7.6278	7.74203	7.63156	7.63269	7.60966	7.72767	7.65019	7.55136	7.57668	7.54937	7.55285	7.39956	7.40292	7.38895	7.42646	7.12046	7.10084	7.09298	7.1447
622	7.59123	7.63316	7.65865	7.75571	7.78526	7.78091	7.70855	7.65314	7.70091	7.74056	7.64298	7.73274	7.64186	7.62624	7.62309	7.50637	7.52294	7.57372	7.70195	7.56787	7.57336	7.5284	7.66663	7.5926	7.49318	7.52196	7.48566	7.49112	7.33655	7.35601	7.33384	7.36477	7.06599	7.04	7.04309	7.10025
624	7.55707	7.601	7.62115	7.69629	7.7253	7.71245	7.65545	7.62145	7.65696	7.69695	7.60984	7.69334	7.59438	7.57739	7.58123	7.45248	7.48669	7.54005	7.65972	7.53281	7.52784	7.47995	7.63157	7.55223	7.44754	7.47593	7.44071	7.44589	7.29675	7.31126	7.28295	7.33231	7.02902	6.99952	7.01249	7.06578
626	7.519	7.55487	7.58736	7.66462	7.68165	7.66511	7.61566	7.57859	7.62409	7.64752	7.56344	7.64937	7.56089	7.52668	7.52775	7.39338	7.44756	7.50481	7.61367	7.50193	7.49677	7.43129	7.59803	7.52008	7.41267	7.44011	7.41183	7.40113	7.27059	7.26365	7.23189	7.3002	6.99175	6.94803	6.97186	7.02847
628	7.49015	7.51716	7.55436	7.63299	7.64714	7.62548	7.56668	7.53089	7.58527	7.58788	7.52258	7.58452	7.51819	7.48301	7.47573	7.35592	7.41467	7.46879	7.56097	7.47823	7.46683	7.39173	7.56364	7.48495	7.36862	7.39903	7.37641	7.34372	7.24606	7.23293	7.19428	7.27145	6.95945	6.90398	6.93306	6.98417
630	7.44578	7.48294	7.51429	7.60302	7.61169	7.59433	7.53557	7.49666	7.55135	7.55446	7.48306	7.54009	7.48096	7.44995	7.43536	7.32726	7.39057	7.43545	7.52287	7.44991	7.43872	7.37098	7.53319	7.4507	7.33332	7.36894	7.34915	7.31608	7.19551	7.18089	7.14921	7.22608	6.93067	6.87698	6.90696	6.9542
632	7.38836	7.43969	7.46241	7.56535	7.58211	7.56776	7.51013	7.46374	7.51844	7.52783	7.43239	7.49993	7.43607	7.40763	7.39334	7.30962	7.35624	7.38441	7.49298	7.4	7.37178	7.34807	7.47421	7.39382	7.29159	7.31727	7.30498	7.29277	7.14586	7.13577	7.1182	7.16507	6.88379	6.84536	6.87014	6.91298
634	7.35963	7.41474	7.42792	7.51252	7.5401	7.52394	7.48171	7.44138	7.48633	7.50496	7.40654	7.46381	7.4003	7.37797	7.36378	7.29269	7.3272	7.34634	7.46477	7.3688	7.313	7.32709	7.4262	7.34566	7.25496	7.26641	7.26577	7.27287	7.12817	7.11215	7.09934	7.13468	6.85171	6.82583	6.84081	6.87829
636	7.32843	7.39301	7.40592	7.48443	7.51	7.49411	7.45824	7.41151	7.4686	7.4844	7.38514	7.44994	7.38897	7.36656	7.33826	7.2795	7.29778	7.32971	7.43894	7.33897	7.30991	7.28932	7.3935	7.32916	7.23886	7.24762	7.24692	7.25718	7.12436	7.08825	7.07461	7.11809	6.84313	6.8073	6.80349	6.86347
638	7.29775	7.37342	7.38534	7.47744	7.49569	7.482	7.42264	7.37846	7.45158	7.45467	7.36502	7.43424	7.38109	7.35936	7.31358	7.27103	7.26957	7.31428	7.41198	7.30936	7.32275	7.24542	7.3626	7.32156	7.2257	7.23257	7.22293	7.22359	7.11759	7.0766	7.05938	7.10376	6.83862	6.78824	6.76306	6.84785
640	7.27873	7.35431	7.37071	7.47359	7.47807	7.47267	7.39321	7.36481	7.43532	7.43532	7.34992	7.42029	7.36925	7.34606	7.29547	7.23148	7.25209	7.29754	7.39397	7.29585	7.32514	7.22241	7.35119	7.31603	7.21319	7.2246	7.21087	7.19909	7.09221	7.07026	7.04066	7.08516	6.82776	6.77489	6.75026	6.83637
642	7.2589	7.3242	7.34923	7.46108	7.46714	7.46502	7.37848	7.34586	7.42428	7.41797	7.32475	7.40951	7.34394	7.30391	7.268	7.17749	7.23058	7.26049	7.37608	7.27961	7.30488	7.2039	7.34314	7.29531	7.18589	7.21897	7.20694	7.18211	7.06115	7.06477	7.02265	7.05101	6.79726	6.74926	6.75295	6.81696
644	7.25195	7.30871	7.33139	7.43102	7.45792	7.44854	7.37242	7.32916	7.40984	7.39795	7.31042	7.39811	7.31759	7.26788	7.24523	7.16659	7.21815	7.2306	7.34664	7.26911	7.28237	7.19412	7.33745	7.27097	7.15841	7.21408	7.20339	7.16854	7.05009	7.05893	7.01938	7.03431	6.7746	6.73452	6.75861	6.79895
646	7.26024	7.31787	7.33928	7.41329	7.45029	7.43671	7.37822	7.32931	7.39883	7.39335	7.31635	7.39552	7.31754	7.27224	7.25244	7.19204	7.22043	7.24501	7.33692	7.26969	7.28068	7.19972	7.34169	7.2698	7.16461	7.21336	7.20437	7.17585	7.05837	7.04769	7.02878	7.06068	6.78438	6.74789	6.76833	6.80545
648	7.2775	7.33563	7.36697	7.43163	7.45682	7.44377	7.39012	7.3426	7.39929	7.40519	7.32906	7.40253	7.3408	7.29927	7.28463	7.21629	7.22947	7.2962	7.36047	7.27548	7.29213	7.21545	7.35555	7.28961	7.20189	7.21016	7.21801	7.21296	7.08006	7.04642	7.04371	7.10403	6.80683	6.77323	6.78909	6.83729
650	7.30293	7.35211	7.39327	7.46898	7.4797	7.46667	7.40532	7.36119	7.41434	7.42581	7.34323	7.41592	7.36787	7.32826	7.31967	7.24187	7.24933	7.33327	7.39362	7.28565	7.30477	7.23259	7.37043	7.30977	7.23792	7.21226	7.23447	7.24656	7.11045	7.09407	7.07455	7.12992	6.82775	6.79611	6.8079	6.86738
652	7.3537	7.39579	7.42439	7.49764	7.50447	7.49369	7.42972	7.40101	7.44556	7.46548	7.38591	7.44974	7.39879	7.37398	7.36171	7.2789	7.31165	7.35755	7.42602	7.32739	7.32706	7.27929	7.40905	7.33815	7.27153	7.24853	7.26313	7.27172	7.14122	7.1687	7.11381	7.16045	6.87322	6.84378	6.842	6.89649
654	7.39661	7.43893	7.45688	7.53983	7.54694	7.54081	7.48108	7.44493	7.50541	7.53115	7.42697	7.51945	7.44534	7.42204	7.40118	7.30234	7.37741	7.3849	7.46537	7.37457	7.36498	7.33086	7.45885	7.38307	7.31483	7.32099	7.31288	7.3121	7.16228	7.19596	7.12873	7.18647	6.93386	6.89437	6.88113	6.93602
656	7.42714	7.46768	7.48232	7.58383	7.60652	7.5915	7.5229	7.47153	7.55627	7.57161	7.45231	7.56514	7.48101	7.44495	7.42427	7.31557	7.39805	7.41037	7.50594	7.4053	7.39387	7.35516	7.48914	7.41634	7.34439	7.36876	7.34373	7.3415	7.19325	7.19445	7.14076	7.2107	6.97311	6.92446	6.90905	6.96636
658	7.46746	7.50402	7.51736	7.6211	7.64456	7.62348	7.56041	7.50705	7.58139	7.59585	7.49018	7.5879	7.51456	7.46436	7.45302	7.32927	7.40703	7.45131	7.55244	7.44666	7.43682	7.37785	7.5291	7.46575	7.36853	7.40625	7.37881	7.38647	7.24208	7.19656	7.15904	7.25368	7.01864	6.95949	6.94967	7.01942
660	7.50366	7.53723	7.55096	7.67894	7.68534	7.66912	7.60487	7.54244	7.60413	7.62365	7.52012	7.61275	7.55432	7.48634	7.48406	7.37023	7.42831	7.49167	7.6052	7.48597	7.48848	7.40272	7.56438	7.51145	7.39504	7.44855	7.42428	7.43966	7.29014	7.2329	7.20595	7.29187	7.0579	6.99087	6.98878	7.07428
662	7.56729	7.59985	7.59668	7.72228	7.72438	7.71141	7.63757	7.59941	7.64294	7.65845	7.5739	7.63829	7.5992	7.53712	7.53596	7.45353	7.50026	7.53949	7.65011	7.55814	7.53814	7.46219	7.61507	7.54185	7.43911	7.4858	7.47691	7.47964	7.33968	7.30685	7.28708	7.35795	7.10459	7.05097	7.0533	7.11403
664	7.62868	7.66368	7.65775	7.7637	7.77278	7.75765	7.69189	7.66916	7.71164	7.71845	7.63238	7.69753	7.66861	7.61516	7.60484	7.5128	7.5875	7.60457	7.69248	7.64282	7.60934	7.54034	7.69293	7.58595	7.52699	7.54454	7.55791	7.53162	7.37661	7.35639	7.33689	7.42553	7.17284	7.12647	7.13801	7.17201
666	7.65863	7.6852	7.69531	7.80563	7.84411	7.80935	7.74116	7.70025	7.76825	7.75863	7.65911	7.74809	7.72154	7.66717	7.6424	7.5492	7.62608	7.64429	7.72591	7.67464	7.6541	7.58139	7.72845	7.61192	7.59099	7.58804	7.60548	7.56352	7.40795	7.38992	7.37959	7.44777	7.20862	7.15815	7.17622	7.21034
668	7.68701	7.70016	7.7124	7.82031	7.87692	7.82998	7.75677	7.71676	7.79453	7.77413	7.69066	7.77671	7.73763	7.70354	7.65931	7.57948	7.65007	7.67076	7.7492	7.67377	7.66946	7.60684	7.72992	7.63845	7.61866	7.61465	7.60567	7.57982	7.43383	7.41824	7.41347	7.46396	7.22276	7.17328	7.19046	7.22274
670	7.6963	7.70508	7.72201	7.82094	7.86832	7.83111	7.75846	7.72901	7.80744	7.78838	7.70513	7.8116	7.73772	7.72129	7.66611	7.57908	7.65689	7.68327	7.76335	7.66132	7.68269	7.61857	7.72341	7.66725	7.62919	7.63663	7.59343	7.59658	7.43354	7.41595	7.4041	7.46739	7.22507	7.18057	7.19405	7.22383
672	7.65743	7.68017	7.70483	7.81157	7.84817	7.82246	7.74845	7.72011	7.79195	7.78082	7.678	7.81668	7.72382	7.6966	7.65187	7.54152	7.61986	7.66431	7.75462	7.63533	7.67788	7.6043	7.7073	7.66199	7.60518	7.6248	7.57459	7.58698	7.41584	7.38305	7.36973	7.43483	7.19926	7.16664	7.16937	7.20703
674	7.59395	7.63568	7.65131	7.77121	7.81399	7.79243	7.7046	7.68073	7.73378	7.72023	7.62822	7.76494	7.67298	7.63002	7.61397	7.4996	7.54976	7.61437	7.70479	7.58965	7.62423	7.569	7.66872	7.6157	7.53019	7.55135	7.52349	7.53043	7.39167	7.34896	7.34391	7.38304	7.14121	7.13131	7.10818	7.15421
676	7.54897	7.59833	7.59361	7.69646	7.74151	7.72669	7.63883	7.63342	7.6703	7.64628	7.59152	7.69098	7.60794	7.57258	7.57673	7.46323	7.4949	7.56506	7.63381	7.55199	7.55718	7.53472	7.63381	7.56487	7.45852	7.46969	7.46859	7.46959	7.35588	7.31183	7.30777	7.3476	7.09498	7.10056	7.06312	7.09903
678	7.49973	7.53489	7.53444	7.63607	7.67058	7.66247	7.58153	7.56246	7.62567	7.5942	7.54442	7.62713	7.55607	7.51825	7.52532	7.41831	7.44169	7.49913	7.57224	7.4846	7.48665	7.46717	7.5819	7.50173	7.41086	7.41938	7.42758	7.41526	7.30056	7.25765	7.24681	7.30231	7.06008	7.03863	7.01721	7.05099
680	7.44911	7.4687	7.46836	7.56174	7.59715	7.58342	7.50901	7.48206	7.56323	7.53722	7.49276	7.54767	7.49585	7.46335	7.45738	7.37417	7.38261	7.41879	7.49717	7.41019	7.39222	7.383	7.51256	7.40899	7.34671	7.36352	7.3775	7.33805	7.23931	7.21663	7.19146	7.2499	7.01725	6.9635	6.96122	6.98853
682	7.37652	7.40835	7.40271	7.48246	7.50893	7.49732	7.44474	7.42296	7.48183	7.48619	7.43289	7.47503	7.4399	7.41433	7.38433	7.29261	7.32388	7.36148	7.42898	7.35233	7.32074	7.31316	7.45494	7.33529	7.28152	7.31441	7.32581	7.2772	7.16369	7.15585	7.11821	7.1839	6.96634	6.90351	6.9079	6.93719
684	7.27126	7.319	7.31691	7.41481	7.44024	7.43348	7.38032	7.34683	7.39165	7.4174	7.33553	7.39802	7.35933	7.33396	7.28937	7.20103	7.24702	7.29862	7.3717	7.26383	7.24938	7.22325	7.37285	7.25888	7.19648	7.26033	7.22911	7.21211	7.07934	7.08819	7.04235	7.08567	6.87317	6.81883	6.82599	6.87667
686	7.18844	7.23947	7.23744	7.32525	7.36459	7.35121	7.30071	7.27069	7.29828	7.33049	7.24498	7.30656	7.25683	7.25193	7.20183	7.12236	7.16917	7.23281	7.3049	7.18972	7.17447	7.14575	7.29094	7.18488	7.11096	7.19235	7.11878	7.13518	7.00255	7.02004	6.96403	7.00344	6.77718	6.74126	6.7493	6.81048
688	7.10347	7.14842	7.16806	7.24896	7.29105	7.26544	7.23068	7.17853	7.21758	7.2382	7.14794	7.22559	7.17308	7.1548	7.10869	7.03477	7.07803	7.14048	7.22403	7.10627	7.10626	7.07756	7.20617	7.12031	7.04581	7.11049	7.0479	7.04471	6.91683	6.91567	6.86206	6.91899	6.69177	6.66189	6.67514	6.7366
690	7.02446	7.05561	7.09739	7.17406	7.21495	7.17486	7.13237	7.06694	7.12896	7.11917	7.05329	7.1339	7.08143	7.03686	7.01264	6.96448	6.98181	7.0211	7.1113	7.00694	7.01538	7.00575	7.10172	7.03279	6.96268	6.98009	6.96383	6.91818	6.83768	6.83771	6.79526	6.83584	6.59382	6.57572	6.58978	6.62371
692	6.96819	6.99609	7.04076	7.09222	7.12352	7.0778	7.03607	6.9986	7.04655	7.03089	6.99346	7.0602	7.00773	6.96384	6.95128	6.90355	6.91456	6.95129	7.00913	6.94548	6.94355	6.94953	7.03461	6.95937	6.89277	6.87731	6.90378	6.83248	6.77338	6.77626	6.74905	6.7809	6.52838	6.51662	6.5304	6.54258
694	6.90564	6.93962	6.97817	7.03887	7.06082	7.01707	6.97036	6.949	6.99467	6.98565	6.93413	7.00955	6.95427	6.90733	6.90261	6.84179	6.85203	6.90867	6.95338	6.89237	6.88561	6.87608	6.98832	6.89559	6.837	6.83125	6.85702	6.79127	6.708	6.71286	6.70188	6.72845	6.48305	6.46012	6.47762	6.50325
696	6.85461	6.88887	6.91425	6.98292	7.01295	6.96756	6.90165	6.90806	6.94639	6.9485	6.88382	6.95416	6.90069	6.85742	6.85893	6.78703	6.80247	6.86767	6.90853	6.84642	6.82151	6.80649	6.94529	6.82549	6.77893	6.79424	6.79935	6.75153	6.6507	6.65968	6.64947	6.68333	6.44397	6.41036	6.42587	6.46891
698	6.79901	6.81834	6.85327	6.92884	6.96276	6.92039	6.8566	6.86305	6.90148	6.91638	6.83221	6.90453	6.85675	6.81022	6.81133	6.72726	6.75063	6.81273	6.85771	6.79416	6.77716	6.74477	6.89355	6.76709	6.72867	6.75554	6.75619	6.71992	6.58812	6.58431	6.56388	6.62418	6.39858	6.35153	6.36535	6.42962
700	6.74105	6.73615	6.78425	6.86636	6.91067	6.86602	6.81265	6.79057	6.85305	6.85469	6.77034	6.83235	6.79863	6.74697	6.7444	6.67663	6.6885	6.72255	6.78794	6.72621	6.72568	6.66838	6.81376	6.7052	6.66905	6.67557	6.69768	6.6598	6.52516	6.52051	6.49887	6.5543	6.32559	6.27196	6.28507	6.35557
702	6.69524	6.69347	6.73202	6.78627	6.84326	6.79489	6.76326	6.73452	6.80255	6.79126	6.71806	6.7603	6.74277	6.69999	6.68977	6.62519	6.64313	6.65175	6.72176	6.67959	6.6749	6.62033	6.75541	6.66119	6.61254	6.60066	6.64269	6.601	6.47159	6.46517	6.44669	6.50851	6.2681	6.22732	6.23324	6.28897
704	6.62588	6.66387	6.68222	6.74042	6.79004	6.75018	6.71964	6.67831	6.75356	6.74308	6.65071	6.71611	6.69478	6.64039	6.63479	6.56801	6.59189	6.60207	6.67843	6.6265	6.62775	6.57402	6.70789	6.62543	6.55856	6.56729	6.59357	6.5571	6.42242	6.39923	6.39156	6.44842	6.22506	6.18784	6.19351	6.24463
706	6.57054	6.63784	6.63404	6.70521	6.74326	6.71935	6.65826	6.62185	6.6788	6.6874	6.59423	6.66861	6.63591	6.57617	6.58342	6.53367	6.5448	6.56027	6.64283	6.57575	6.5702	6.53139	6.66029	6.58168	6.49565	6.53166	6.52622	6.50605	6.39503	6.36775	6.36549	6.39752	6.18066	6.1517	6.15511	6.19569
708	6.54593	6.60349	6.60777	6.6751	6.69102	6.68883	6.6163	6.58659	6.62113	6.65471	6.56844	6.63942	6.60362	6.54839	6.56089	6.49958	6.51301	6.54557	6.6152	6.54441	6.53881	6.50929	6.63276	6.55328	6.45951	6.5035	6.48554	6.47697	6.36984	6.34821	6.33985	6.36459	6.14919	6.13175	6.1272	6.17007
710	6.52397	6.55793	6.58995	6.65196	6.66281	6.66822	6.59517	6.54493	6.60855	6.63299	6.54456	6.62046	6.58767	6.53357	6.53581	6.46535	6.48209	6.53073	6.58947	6.51046	6.52293	6.47984	6.59275	6.52225	6.43512	6.46914	6.45473	6.45105	6.33419	6.3319	6.31526	6.32134	6.11228	6.10173	6.08687	6.14959
712	6.50755	6.53498	6.57365	6.6097	6.64279	6.63846	6.5745	6.51593	6.61015	6.61184	6.5273	6.60068	6.57422	6.52428	6.50947	6.43758	6.46716	6.51389	6.56262	6.48876	6.50472	6.45739	6.56103	6.4944	6.41216	6.43383	6.42727	6.42293	6.30321	6.31143	6.29285	6.2978	6.08226	6.07838	6.05718	6.12807
714	6.47896	6.51994	6.53846	6.57916	6.62872	6.61595	6.55774	6.49997	6.60654	6.59206	6.50399	6.58391	6.55623	6.50121	6.47913	6.40452	6.45198	6.48422	6.54035	6.46714	6.47905	6.43134	6.53815	6.47995	6.40021	6.41924	6.41015	6.39822	6.27624	6.2749	6.26433	6.28656	6.0599	6.04589	6.03366	6.09964
716	6.44756	6.50282	6.49081	6.55902	6.60944	6.59488	6.52233	6.48133	6.57796	6.55204	6.47934	6.54975	6.50864	6.4629	6.43889	6.3781	6.43051	6.44057	6.51126	6.44051	6.4344	6.39855	6.50736	6.4649	6.38938	6.40995	6.38731	6.35591	6.25537	6.25344	6.2452	6.27374	6.03552	6.00742	6.00598	6.05145
718	6.41919	6.47874	6.46361	6.54009	6.57291	6.56674	6.49158	6.4645	6.54104	6.51712	6.46183	6.51814	6.46622	6.43321	6.41468	6.34152	6.40919	6.416	6.48505	6.42143	6.40495	6.37853	6.49181	6.45194	6.37628	6.39748	6.37094	6.32832	6.23477	6.22123	6.22011	6.25479	6.02459	5.98794	5.99036	6.01963
720	6.37771	6.43535	6.44498	6.52846	6.54885	6.54666	6.47907	6.44099	6.51489	6.49213	6.43451	6.4957	6.4425	6.39265	6.39601	6.30437	6.3689	6.39383	6.46414	6.39844	6.39115	6.35594	6.4799	6.42246	6.35138	6.36291	6.3507	6.3204	6.20511	6.18232	6.18902	6.21918	6.01755	5.96617	5.97092	5.99722
722	6.34656	6.40473	6.43081	6.50865	6.52727	6.51911	6.46125	6.42052	6.48988	6.46908	6.41532	6.47191	6.42098	6.36344	6.38162	6.28307	6.33255	6.37079	6.43618	6.37928	6.37744	6.33576	6.4665	6.38419	6.32293	6.31662	6.32492	6.31297	6.17565	6.16298	6.15949	6.1918	6.00639	5.94695	5.95178	5.97685
724	6.32472	6.37815	6.41365	6.49085	6.50285	6.4914	6.44459	6.40548	6.47571	6.4537	6.39511	6.46061	6.41021	6.35604	6.36543	6.25641	6.30297	6.34884	6.40718	6.35491	6.36001	6.3111	6.44973	6.35816	6.30137	6.29413	6.30572	6.29809	6.14286	6.1412	6.12048	6.17305	5.97938	5.92673	5.9275	5.9662
726	6.308	6.34752	6.38315	6.47075	6.47615	6.4714	6.41324	6.38163	6.46124	6.42268	6.36663	6.44771	6.39349	6.34302	6.3446	6.23372	6.27031	6.31666	6.37563	6.32245	6.32549	6.27499	6.42427	6.32704	6.26407	6.27493	6.27494	6.2642	6.1205	6.12777	6.09459	6.15317	5.9308	5.89973	5.89068	5.94559
728	6.29669	6.32714	6.35727	6.44301	6.43694	6.44543	6.37779	6.35977	6.43324	6.39333	6.3459	6.43192	6.37385	6.32686	6.3294	6.21015	6.24871	6.29127	6.35004	6.30478	6.29801	6.24946	6.40106	6.30046	6.23154	6.26036	6.24971	6.23344	6.10776	6.11097	6.07125	6.13493	5.90184	5.88333	5.86857	5.92671
730	6.27698	6.29867	6.32776	6.42298	6.4118	6.42157	6.35399	6.32836	6.39179	6.36957	6.31273	6.40045	6.3511	6.30513	6.29764	6.18505	6.22609	6.26468	6.33358	6.27901	6.27567	6.20734	6.35998	6.27442	6.20943	6.24714	6.22471	6.20523	6.0771	6.08548	6.04727	6.10079	5.88128	5.8573	5.84612	5.89986
732	6.2591	6.27518	6.29827	6.38405	6.39014	6.38181	6.32066	6.29598	6.3365	6.34091	6.28252	6.34096	6.3199	6.28297	6.26474	6.1686	6.20452	6.23805	6.3088	6.25096	6.24318	6.16774	6.31589	6.24706	6.18728	6.22371	6.18835	6.17082	6.04586	6.06565	6.03367	6.07068	5.85938	5.83145	5.8235	5.86145
734	6.23696	6.25739	6.27646	6.3465	6.36137	6.34103	6.29621	6.27069	6.29978	6.32486	6.25978	6.31017	6.29281	6.26321	6.24024	6.14379	6.18068	6.21982	6.27643	6.2315	6.22478	6.15193	6.29479	6.22997	6.17392	6.20365	6.17013	6.15166	6.02486	6.02559	6.01112	6.04739	5.84103	5.81281	5.80548	5.83968
736	6.20984	6.23364	6.24536	6.32401	6.34032	6.32023	6.28126	6.23422	6.28522	6.3061	6.23304	6.29853	6.25167	6.23716	6.20282	6.11803	6.14695	6.19617	6.23908	6.21079	6.21442	6.13577	6.27707	6.20862	6.15155	6.17377	6.15047	6.13377	6.0097	5.99056	5.99114	6.02202	5.81452	5.78685	5.77768	5.81939
738	6.19152	6.21347	6.21379	6.29814	6.31267	6.29689	6.26397	6.20408	6.27537	6.28126	6.21359	6.28394	6.21174	6.21602	6.17301	6.09314	6.12205	6.17866	6.20987	6.19438	6.20206	6.12308	6.26122	6.1908	6.12697	6.14352	6.1284	6.11587	5.98841	5.97198	5.97041	6.00602	5.7922	5.76761	5.75867	5.80128
740	6.16131	6.17906	6.17641	6.27864	6.29014	6.27716	6.24445	6.17082	6.25883	6.24759	6.17443	6.26103	6.19318	6.17809	6.14725	6.06317	6.09658	6.16127	6.19415	6.16736	6.17614	6.09279	6.22963	6.16544	6.10417	6.12472	6.0998	6.09026	5.95669	5.95105	5.94418	5.98211	5.75913	5.74232	5.73307	5.78192
742	6.13076	6.14744	6.14379	6.24373	6.26361	6.23794	6.2101	6.13784	6.2243	6.19602	6.13925	6.21617	6.17465	6.13381	6.12287	6.04874	6.0708	6.13588	6.16806	6.14026	6.134	6.06006	6.18981	6.12697	6.06567	6.09822	6.05138	6.04767	5.93481	5.93536	5.92707	5.95874	5.71594	5.71559	5.70291	5.75077
744	6.10685	6.12306	6.12856	6.20774	6.22469	6.18463	6.18147	6.1237	6.19437	6.16533	6.12425	6.18393	6.15557	6.11518	6.10923	6.03285	6.0536	6.11398	6.14075	6.12713	6.10816	6.05149	6.1714	6.10495	6.03847	6.07221	6.02249	6.02413	5.92477	5.89732	5.90371	5.93968	5.69722	5.69472	5.68569	5.72847
746	6.07749	6.08635	6.10554	6.19053	6.19865	6.15772	6.15818	6.11361	6.17572	6.1547	6.10191	6.16514	6.13187	6.10352	6.0998	6.01178	6.03299	6.08928	6.12799	6.11134	6.09708	6.04658	6.15427	6.08563	6.02464	6.02234	6.01782	6.01271	5.91496	5.85917	5.87967	5.91129	5.69314	5.65977	5.66644	5.70687
748	6.05446	6.0635	6.07906	6.17024	6.1747	6.14362	6.13008	6.10528	6.14799	6.1483	6.08478	6.14485	6.10991	6.09165	6.08718	5.99353	6.01911	6.06894	6.11871	6.0954	6.08693	6.04017	6.14149	6.0661	6.01726	5.96671	6.01855	6.00118	5.89715	5.84287	5.84587	5.89012	5.68825	5.63496	5.64988	5.68728
750	6.0119	6.04722	6.04877	6.15317	6.15247	6.1341	6.1082	6.08146	6.11738	6.13188	6.06216	6.12673	6.09653	6.06798	6.04279	5.96609	6.00731	6.03838	6.10681	6.05301	6.06161	6.01238	6.1273	6.0503	6.00549	5.94765	6.00365	5.98414	5.86068	5.82448	5.80127	5.85514	5.66527	5.61158	5.62822	5.672
752	5.97298	6.03038	6.02049	6.11621	6.12484	6.1145	6.07896	6.04416	6.095	6.09217	6.04044	6.09421	6.07542	6.03357	5.98431	5.94112	5.99417	5.99144	6.08226	6.00005	6.00562	5.9733	6.1048	6.02812	5.96534	5.94055	5.96056	5.94466	5.82942	5.81285	5.77817	5.81936	5.62988	5.5847	5.59967	5.64701
754	5.96	6.01445	6.01171	6.07299	6.08642	6.0859	6.05638	6.022	6.08266	6.06161	6.02667	6.06515	6.05168	6.00918	5.96241	5.91011	5.98099	5.96769	6.0528	5.97543	5.96768	5.95301	6.0867	6.01172	5.92679	5.93833	5.929	5.91626	5.81853	5.78678	5.76112	5.8074	5.60867	5.56816	5.57976	5.62551
756	5.95158	5.99126	6.00893	6.05595	6.06774	6.06653	6.03871	6.00192	6.06322	6.04277	5.99719	6.05038	6.02414	5.97813	5.96333	5.88257	5.9497	5.96232	6.02645	5.95014	5.95605	5.92637	6.05622	5.98924	5.90139	5.92306	5.90978	5.90069	5.80869	5.75784	5.74532	5.79623	5.5874	5.54897	5.55216	5.60078
758	5.94648	5.9748	6.00475	6.04042	6.06442	6.04958	6.01326	5.98517	6.03151	6.02193	5.97312	6.03722	5.99623	5.95507	5.95706	5.8637	5.91837	5.95705	5.99427	5.93062	5.94633	5.90598	6.02917	5.96035	5.87983	5.89439	5.88636	5.88582	5.7925	5.74622	5.73579	5.78435	5.56795	5.53414	5.52886	5.57587
760	5.93097	5.95727	5.9813	6.02817	6.06002	6.03506	5.99502	5.97218	6.00812	6.00477	5.94154	6.0258	5.97677	5.94232	5.92856	5.83627	5.89326	5.93761	5.97345	5.91259	5.93002	5.89126	6.01356	5.93633	5.86071	5.87398	5.86346	5.87486	5.76321	5.72963	5.72434	5.76347	5.54885	5.52036	5.51398	5.55842
762	5.90887	5.93607	5.9427	6.01115	6.04453	6.0171	5.96719	5.95499	5.99668	5.97776	5.90575	6.00387	5.94568	5.9242	5.89042	5.81232	5.86678	5.90327	5.96236	5.88689	5.89744	5.86858	5.99155	5.89966	5.82561	5.84091	5.82711	5.85106	5.73654	5.71608	5.70966	5.74076	5.51614	5.49959	5.49537	5.52896
764	5.88697	5.91875	5.91814	5.9871	6.011	5.98982	5.93985	5.93669	5.98421	5.95677	5.89205	5.98062	5.91745	5.90479	5.86564	5.79312	5.84937	5.87618	5.9484	5.86427	5.87244	5.85156	5.97336	5.87362	5.79699	5.81338	5.7976	5.82592	5.71176	5.68709	5.67563	5.72549	5.49322	5.47964	5.47948	5.50354
766	5.85177	5.88479	5.89478	5.96777	5.97992	5.9668	5.9194	5.89736	5.96053	5.94386	5.87823	5.95447	5.90161	5.86284	5.83307	5.77413	5.8221	5.84811	5.92226	5.82557	5.84838	5.81588	5.92691	5.84951	5.77762	5.79402	5.77276	5.79707	5.67638	5.65022	5.63409	5.6902	5.47622	5.44536	5.4501	5.48016
768	5.82466	5.8577	5.87082	5.93302	5.94776	5.93247	5.88793	5.85644	5.92611	5.92897	5.86321	5.91009	5.88608	5.82259	5.80027	5.75357	5.80052	5.82557	5.88997	5.79448	5.81648	5.78146	5.87576	5.81948	5.76188	5.76538	5.74213	5.75957	5.64727	5.6315	5.60663	5.65759	5.46141	5.41602	5.42138	5.45294
770	5.79692	5.82936	5.84615	5.9024	5.91628	5.90243	5.86547	5.83177	5.89941	5.90975	5.83458	5.8783	5.87149	5.80095	5.77961	5.70957	5.78486	5.80625	5.86621	5.7798	5.7957	5.75927	5.85645	5.79649	5.75286	5.74682	5.72243	5.73215	5.62081	5.60446	5.57496	5.62224	5.44117	5.39091	5.39887	5.4308
772	5.7676	5.79272	5.81378	5.88254	5.89269	5.88489	5.83587	5.809	5.86477	5.86489	5.79738	5.84474	5.83524	5.77036	5.7612	5.6732	5.76579	5.76697	5.84387	5.76212	5.76818	5.73167	5.84566	5.76046	5.73299	5.71897	5.70076	5.68971	5.59539	5.5804	5.55422	5.57982	5.40318	5.35395	5.36497	5.39523
774	5.74957	5.77465	5.7882	5.85684	5.85787	5.86374	5.80116	5.79504	5.82793	5.82393	5.77637	5.81304	5.79646	5.74521	5.74562	5.65632	5.74693	5.73573	5.82071	5.74887	5.74511	5.71608	5.83461	5.73044	5.71322	5.69371	5.68223	5.65276	5.57023	5.54785	5.53818	5.55846	5.37607	5.33253	5.34215	5.36514
776	5.72456	5.75256	5.76441	5.83349	5.83022	5.84825	5.77651	5.77237	5.81217	5.80172	5.74551	5.79508	5.7772	5.71282	5.71567	5.64283	5.70423	5.70894	5.79629	5.72026	5.72922	5.69695	5.80111	5.7022	5.68576	5.6758	5.66884	5.63505	5.5378	5.50427	5.51927	5.53264	5.35271	5.30963	5.31887	5.34431
778	5.70198	5.72931	5.7412	5.79093	5.81096	5.81871	5.74488	5.74556	5.78716	5.77697	5.71786	5.77177	5.76329	5.68626	5.68796	5.62521	5.66264	5.67798	5.76628	5.6903	5.70855	5.67473	5.76316	5.66475	5.64703	5.64738	5.65031	5.61822	5.5079	5.47968	5.49759	5.50966	5.32458	5.2871	5.29526	5.32083
780	5.67438	5.69416	5.70913	5.75145	5.78763	5.77744	5.72063	5.71927	5.7483	5.75769	5.69499	5.75236	5.75187	5.6688	5.67047	5.58484	5.63313	5.65308	5.73338	5.66532	5.68693	5.64644	5.7439	5.64148	5.61535	5.62475	5.629	5.6013	5.48041	5.45288	5.45302	5.48591	5.29746	5.26595	5.27293	5.30156
782	5.63718	5.64239	5.66215	5.72717	5.76087	5.7357	5.68715	5.67418	5.70974	5.71449	5.6638	5.72245	5.71023	5.63065	5.64059	5.54806	5.59392	5.61468	5.68704	5.62839	5.63862	5.597	5.71908	5.6141	5.57586	5.58418	5.57864	5.56495	5.45403	5.42861	5.41878	5.45218	5.2573	5.23242	5.23329	5.26408
784	5.60526	5.608	5.62851	5.69577	5.71812	5.67713	5.64612	5.63905	5.67659	5.66625	5.64041	5.68853	5.65689	5.60045	5.60952	5.51569	5.56471	5.57831	5.63854	5.60631	5.5925	5.56485	5.70127	5.58784	5.53663	5.54237	5.5294	5.52726	5.43103	5.40238	5.40032	5.4257	5.22585	5.20661	5.20594	5.22512
786	5.5584	5.5719	5.59636	5.67068	5.68315	5.64157	5.61885	5.6061	5.64195	5.63848	5.59928	5.66463	5.62056	5.57837	5.57051	5.47897	5.53293	5.54299	5.60064	5.56875	5.56565	5.53532	5.67523	5.56287	5.50509	5.52176	5.50359	5.49707	5.40086	5.36714	5.37923	5.38142	5.19479	5.1689	5.17279	5.18623
788	5.51452	5.54148	5.56185	5.62774	5.65181	5.61952	5.58711	5.56874	5.59998	5.60872	5.55962	5.62638	5.58122	5.55902	5.52847	5.45286	5.5049	5.50631	5.5652	5.52796	5.52999	5.50307	5.63896	5.5303	5.46934	5.49285	5.4759	5.45539	5.37165	5.34251	5.35444	5.34299	5.15892	5.12788	5.13326	5.13575
790	5.47923	5.51918	5.53044	5.58374	5.61064	5.59288	5.5621	5.53485	5.57229	5.58199	5.5279	5.59471	5.5536	5.53669	5.49198	5.42106	5.4803	5.47988	5.53761	5.50336	5.50402	5.47305	5.60839	5.50311	5.44285	5.4696	5.45271	5.42332	5.34056	5.30246	5.30463	5.31953	5.13365	5.09611	5.10349	5.10516
792	5.4405	5.49054	5.4909	5.55468	5.58546	5.56962	5.53209	5.49026	5.54902	5.53602	5.48256	5.55698	5.52158	5.48582	5.44681	5.38915	5.4442	5.44246	5.51605	5.46531	5.46154	5.42468	5.55654	5.46121	5.41467	5.43754	5.41335	5.38108	5.30582	5.26501	5.25887	5.28529	5.09675	5.05192	5.05897	5.07688
794	5.41254	5.46645	5.46074	5.51722	5.55991	5.53411	5.49036	5.45596	5.51607	5.48481	5.45062	5.51117	5.48406	5.44454	5.41649	5.35436	5.4154	5.41211	5.49456	5.4355	5.41646	5.38849	5.51379	5.41838	5.37972	5.40042	5.37129	5.33946	5.26335	5.23556	5.22535	5.25599	5.06217	5.02076	5.02585	5.04959
796	5.37872	5.42007	5.43417	5.49137	5.53279	5.49886	5.45872	5.41435	5.4844	5.45569	5.41392	5.4778	5.45232	5.41468	5.40202	5.3169	5.37807	5.38751	5.46938	5.39419	5.39532	5.34656	5.47788	5.38434	5.3432	5.3603	5.33909	5.31819	5.20181	5.1925	5.18895	5.21144	5.02401	4.98527	4.99399	5.02574
798	5.34744	5.37425	5.4048	5.46248	5.49639	5.45398	5.4175	5.36289	5.44123	5.42681	5.37772	5.42752	5.40591	5.38129	5.38406	5.29161	5.33647	5.35441	5.43023	5.34891	5.37314	5.29958	5.43719	5.3438	5.29673	5.29609	5.2944	5.29762	5.15358	5.16492	5.16318	5.17038	4.97838	4.94752	4.95603	4.99341
800	5.32442	5.34728	5.37803	5.43236	5.4438	5.40988	5.38713	5.33408	5.39862	5.40329	5.34765	5.38443	5.37044	5.35389	5.34991	5.2429	5.29707	5.32693	5.39057	5.31408	5.34986	5.27025	5.413	5.31544	5.26054	5.25319	5.25987	5.27981	5.13012	5.12833	5.12546	5.14124	4.9485	4.92157	4.92718	4.96844
802	5.29666	5.31216	5.33892	5.40428	5.40686	5.38759	5.35845	5.30832	5.36325	5.37076	5.30776	5.35093	5.33527	5.31133	5.28531	5.19983	5.24284	5.28032	5.34597	5.26096	5.30304	5.23548	5.38239	5.28836	5.21813	5.22417	5.22763	5.24172	5.11888	5.09138	5.08967	5.09947	4.91564	4.88321	4.88738	4.93154
804	5.27672	5.2876	5.3072	5.35636	5.37234	5.35723	5.31832	5.28539	5.33209	5.3349	5.28334	5.31975	5.29497	5.27573	5.23871	5.18184	5.20375	5.24022	5.30752	5.22362	5.25245	5.21194	5.35571	5.26568	5.18054	5.19541	5.19872	5.19889	5.10266	5.06682	5.06553	5.07392	4.88608	4.85539	4.85804	4.89305
806	5.24853	5.25786	5.28715	5.3231	5.34363	5.32871	5.2926	5.25478	5.31291	5.31536	5.2608	5.30694	5.26688	5.25084	5.22113	5.16233	5.18429	5.21905	5.28668	5.20087	5.22862	5.18923	5.32511	5.25138	5.1679	5.17505	5.1798	5.1753	5.06513	5.0389	5.03727	5.0554	4.85867	4.83006	4.83799	4.86819
808	5.22094	5.23065	5.26391	5.30135	5.3189	5.31088	5.26138	5.21879	5.28982	5.29601	5.23892	5.28986	5.23329	5.22208	5.21304	5.14561	5.17282	5.20263	5.26205	5.17994	5.20795	5.16163	5.28523	5.22612	5.15725	5.14968	5.14939	5.1466	5.02808	5.02004	5.01497	5.03868	4.82677	4.80352	4.8158	4.8377
810	5.20109	5.21591	5.24208	5.28123	5.28219	5.29539	5.2349	5.19935	5.26377	5.28014	5.21977	5.27381	5.21307	5.19639	5.20453	5.11604	5.15992	5.18752	5.23109	5.16422	5.19263	5.1463	5.26521	5.20178	5.14465	5.13515	5.12974	5.1257	4.99955	4.99628	4.98466	5.02242	4.80397	4.78673	4.79916	4.81818
812	5.17732	5.1942	5.21126	5.26472	5.2605	5.28324	5.21892	5.18574	5.24819	5.25283	5.1879	5.25682	5.19992	5.1582	5.18467	5.08978	5.13765	5.15541	5.1996	5.14392	5.1809	5.13052	5.24291	5.16468	5.11188	5.12132	5.10989	5.10358	4.97525	4.97276	4.95883	4.99286	4.77342	4.76355	4.76994	4.79801
814	5.16125	5.17767	5.19084	5.23881	5.24964	5.26056	5.20186	5.17488	5.23939	5.21946	5.16939	5.23263	5.18884	5.13093	5.16427	5.08186	5.12011	5.12412	5.17329	5.13248	5.17093	5.11649	5.22485	5.13061	5.07453	5.10621	5.08554	5.08137	4.96403	4.95803	4.94893	4.9738	4.75011	4.74683	4.74623	4.77897
816	5.13843	5.16018	5.17912	5.22252	5.24175	5.24179	5.1921	5.16198	5.22868	5.19902	5.15113	5.21763	5.18325	5.12014	5.14234	5.06842	5.1017	5.10443	5.16414	5.12138	5.15688	5.09257	5.21087	5.11477	5.06004	5.09772	5.0723	5.07021	4.95516	4.93981	4.94089	4.95431	4.74253	4.72816	4.72645	4.76939
818	5.11777	5.14432	5.16106	5.21954	5.2307	5.22626	5.17975	5.14599	5.19752	5.17648	5.13053	5.19823	5.16658	5.10948	5.11743	5.05105	5.07853	5.09089	5.1626	5.10548	5.12526	5.06171	5.19176	5.09423	5.04743	5.07712	5.05946	5.05016	4.94491	4.92982	4.93214	4.93451	4.74032	4.70478	4.7025	4.7558
820	5.10412	5.13298	5.14159	5.21859	5.2111	5.20874	5.16596	5.13306	5.16761	5.16519	5.11688	5.18308	5.14984	5.10257	5.10029	5.02481	5.06009	5.08648	5.15998	5.09149	5.10164	5.04431	5.18128	5.07931	5.04146	5.05882	5.04907	5.03395	4.92619	4.92279	4.91272	4.92342	4.73816	4.68964	4.69183	4.74629
822	5.08524	5.11286	5.11293	5.21171	5.20116	5.19832	5.14887	5.11689	5.15835	5.16853	5.09536	5.16746	5.13663	5.09032	5.07867	5.00012	5.04376	5.07097	5.14744	5.06609	5.08785	5.02914	5.17107	5.06309	5.04041	5.03828	5.03156	5.0113	4.90361	4.91707	4.89605	4.90907	4.72245	4.66541	4.6819	4.7385
824	5.07684	5.10325	5.09477	5.19764	5.20009	5.18796	5.12976	5.10634	5.15643	5.17551	5.08624	5.14469	5.12152	5.07902	5.06646	4.99173	5.04239	5.05472	5.12985	5.05212	5.07314	5.02214	5.16323	5.04645	5.03583	5.01767	5.01501	4.9888	4.90143	4.91632	4.89483	4.90433	4.70769	4.65386	4.67631	4.73194
826	5.0808	5.10819	5.10043	5.19249	5.20415	5.18363	5.13287	5.10695	5.16298	5.18448	5.09945	5.14342	5.12224	5.09085	5.07969	4.99071	5.0569	5.06175	5.12966	5.06304	5.07128	5.03085	5.17131	5.05163	5.03654	5.02063	5.01962	4.99379	4.92332	4.91942	4.89699	4.91842	4.71407	4.67691	4.68243	4.73616
828	5.09222	5.11936	5.12033	5.21295	5.22373	5.19941	5.17028	5.11809	5.18162	5.20277	5.12077	5.17328	5.15164	5.11839	5.10457	5.00322	5.07571	5.09437	5.1523	5.08415	5.08264	5.05028	5.19526	5.08288	5.05111	5.04612	5.04575	5.02788	4.95192	4.93076	4.9056	4.93927	4.73159	4.71505	4.69774	4.75576
830	5.12171	5.14209	5.15218	5.24746	5.26452	5.23235	5.21195	5.1412	5.21011	5.22445	5.14639	5.21103	5.18822	5.14209	5.12913	5.04771	5.09705	5.12915	5.18513	5.10623	5.10124	5.07709	5.21997	5.11229	5.07149	5.07601	5.07256	5.06356	4.98872	4.9725	4.94053	4.96185	4.75128	4.74553	4.71931	4.7772
832	5.18139	5.19854	5.21128	5.28251	5.30573	5.27088	5.25083	5.19513	5.25173	5.26101	5.20003	5.25132	5.23693	5.19157	5.17323	5.10467	5.14722	5.17347	5.23105	5.15111	5.14877	5.13799	5.25948	5.14854	5.11483	5.11791	5.11414	5.10716	5.03108	5.03276	4.99125	5.00553	4.80114	4.79749	4.76916	4.81548
834	5.24411	5.26416	5.28228	5.35144	5.36522	5.34455	5.31146	5.2637	5.32183	5.32327	5.26338	5.31043	5.30748	5.25077	5.23837	5.16524	5.20543	5.22965	5.29812	5.20665	5.22293	5.20764	5.31114	5.20075	5.18611	5.17782	5.17712	5.16885	5.08519	5.10122	5.05796	5.05847	4.87027	4.85915	4.83311	4.87227
836	5.34282	5.36189	5.36977	5.43344	5.44521	5.43242	5.384	5.35049	5.41231	5.40163	5.35805	5.38249	5.38511	5.32448	5.33026	5.25473	5.29378	5.30576	5.38357	5.29004	5.30857	5.28964	5.3904	5.28287	5.27144	5.24613	5.25166	5.23931	5.17507	5.20277	5.16109	5.16285	4.95675	4.94654	4.91954	4.94903
838	5.46056	5.48082	5.47767	5.54195	5.55002	5.52877	5.50046	5.4644	5.52657	5.51856	5.47438	5.50247	5.49635	5.42984	5.44195	5.34818	5.40994	5.41493	5.4921	5.40163	5.43286	5.39519	5.50908	5.42368	5.39362	5.36261	5.37045	5.34578	5.2752	5.29071	5.25383	5.29461	5.07247	5.05822	5.03683	5.08279
840	5.56073	5.5881	5.58347	5.67228	5.69097	5.64555	5.62368	5.5734	5.6445	5.63526	5.57856	5.6292	5.60622	5.53364	5.5412	5.46001	5.51179	5.51836	5.59992	5.50702	5.54779	5.49673	5.61226	5.55308	5.508	5.47978	5.48165	5.45141	5.37976	5.37102	5.354	5.39511	5.1788	5.15397	5.14263	5.20312
842	5.6671	5.70621	5.69798	5.78119	5.80888	5.75503	5.7267	5.69034	5.74015	5.74713	5.69229	5.73454	5.70746	5.65612	5.64332	5.57144	5.62489	5.6364	5.70557	5.62825	5.647	5.61475	5.7213	5.67143	5.60844	5.5843	5.58894	5.55727	5.48942	5.4541	5.45043	5.49445	5.29179	5.25942	5.25533	5.305
844	5.74925	5.79841	5.80025	5.89353	5.90844	5.87864	5.82949	5.79592	5.82665	5.85886	5.78501	5.83996	5.81365	5.76787	5.74459	5.66115	5.72594	5.75482	5.81926	5.73092	5.74623	5.71941	5.82267	5.77952	5.70628	5.68468	5.6963	5.66524	5.57984	5.53944	5.53086	5.58095	5.39902	5.34969	5.35746	5.40022
846	5.82866	5.88207	5.88614	5.98417	5.99622	5.98749	5.91184	5.88779	5.91196	5.94454	5.87356	5.92564	5.90053	5.85597	5.83707	5.7476	5.81692	5.84865	5.9109	5.81695	5.83186	5.80808	5.91018	5.85462	5.79144	5.76121	5.77049	5.75137	5.66194	5.64655	5.61915	5.66942	5.48846	5.43185	5.4494	5.47369
848	5.90661	5.95839	5.96821	6.054	6.06582	6.06385	5.99426	5.9759	6.01113	6.02584	5.95942	6.0078	5.98317	5.93705	5.9206	5.81566	5.90407	5.93429	5.98504	5.89814	5.92553	5.89385	6.00352	5.92381	5.87735	5.84565	5.85198	5.84526	5.73513	5.72401	5.68999	5.75233	5.57178	5.51729	5.5402	5.55101
850	5.97401	6.01114	6.03419	6.11485	6.13994	6.13188	6.06385	6.03526	6.09607	6.09001	6.0184	6.07416	6.04154	5.98888	5.98165	5.8891	5.96884	5.99363	6.04324	5.95496	5.99424	5.95063	6.06575	5.98452	5.94514	5.91958	5.91234	5.91691	5.80727	5.78038	5.76118	5.8078	5.6243	5.57681	5.59366	5.61061
852	6.0538	6.06981	6.10069	6.1546	6.19046	6.18346	6.11531	6.0932	6.15391	6.14727	6.08164	6.12417	6.0836	6.04007	6.03565	5.95235	6.03905	6.04757	6.08947	6.02729	6.05095	6.00822	6.12565	6.06064	6.00195	5.99041	5.96463	5.96831	5.87265	5.82731	5.82062	5.86111	5.66935	5.63815	5.64085	5.66605
854	6.10095	6.10851	6.14049	6.2074	6.23293	6.23948	6.1681	6.13554	6.20303	6.19932	6.11887	6.17325	6.13157	6.08003	6.07499	5.98804	6.08244	6.09186	6.14268	6.07531	6.10567	6.0512	6.16957	6.12809	6.05713	6.05927	6.01781	6.01183	5.91036	5.86214	5.85378	5.89484	5.70278	5.67784	5.67434	5.71804
856	6.12972	6.1406	6.15487	6.24583	6.27019	6.27385	6.19364	6.15829	6.23311	6.21793	6.13647	6.20473	6.1678	6.10998	6.10644	6.01896	6.09744	6.11721	6.18356	6.09315	6.12693	6.0773	6.18047	6.14576	6.08076	6.08475	6.04377	6.03864	5.93912	5.90878	5.8872	5.91239	5.71979	5.69342	5.69202	5.74168
858	6.1507	6.17131	6.16994	6.26435	6.29264	6.27917	6.20522	6.18048	6.24878	6.23011	6.15162	6.23547	6.21056	6.14219	6.13916	6.03979	6.10723	6.13756	6.21883	6.11052	6.14384	6.09931	6.18455	6.14877	6.09528	6.0969	6.06886	6.07692	5.96033	5.93633	5.90597	5.92623	5.73773	5.70651	5.70967	5.75988
860	6.16237	6.18774	6.18313	6.28095	6.3177	6.28313	6.21383	6.19344	6.26375	6.2406	6.16274	6.25639	6.23862	6.16068	6.15598	6.06983	6.11777	6.14668	6.24537	6.12504	6.1589	6.11445	6.19062	6.15458	6.10713	6.10842	6.08745	6.10274	5.97695	5.95277	5.92301	5.94058	5.75035	5.71581	5.71568	5.76795
862	6.17892	6.20557	6.19895	6.2898	6.33284	6.29579	6.22893	6.20503	6.28741	6.2546	6.18409	6.26309	6.23707	6.18422	6.16905	6.0947	6.14123	6.1635	6.2501	6.15464	6.1737	6.14931	6.22304	6.16233	6.12786	6.1229	6.10259	6.1103	5.99066	5.96656	5.93915	5.96684	5.76936	5.73568	5.71652	5.77614
864	6.18887	6.2132	6.21383	6.3028	6.35003	6.32569	6.25285	6.21544	6.31532	6.27197	6.19834	6.27042	6.22471	6.20254	6.18118	6.09826	6.16072	6.18091	6.24961	6.17415	6.18872	6.17388	6.25042	6.16804	6.15467	6.13858	6.11691	6.11525	6.00044	5.9659	5.94086	5.98322	5.78653	5.74896	5.71497	5.78551
866	6.19099	6.21257	6.22835	6.30905	6.36316	6.34394	6.26107	6.22366	6.32163	6.27699	6.20861	6.27492	6.22443	6.20089	6.18507	6.09364	6.16826	6.19441	6.24906	6.16744	6.19436	6.16546	6.24856	6.17301	6.15751	6.14387	6.12184	6.11449	6.00901	5.95161	5.93349	5.98234	5.78011	5.73838	5.70934	5.78234
868	6.19099	6.20915	6.23656	6.29735	6.3547	6.33612	6.2601	6.23018	6.31135	6.28153	6.21731	6.27549	6.24051	6.19032	6.1863	6.08786	6.17065	6.20619	6.24802	6.15093	6.19931	6.14762	6.24195	6.18293	6.14124	6.13847	6.12045	6.10729	6.00665	5.94025	5.92342	5.97561	5.75564	5.71814	5.70165	5.76682
870	6.18956	6.20143	6.22963	6.28206	6.33387	6.32099	6.26064	6.22768	6.29934	6.2862	6.2118	6.27505	6.25298	6.18457	6.1859	6.07201	6.16933	6.20255	6.2502	6.14598	6.20103	6.13896	6.23831	6.18885	6.12663	6.1313	6.11879	6.09902	5.99203	5.93199	5.90486	5.96912	5.73654	5.70646	5.69893	5.75034
872	6.18218	6.18587	6.21245	6.27709	6.32034	6.31082	6.25871	6.21863	6.28567	6.27184	6.19413	6.26766	6.24872	6.17821	6.17996	6.06029	6.1626	6.17992	6.23931	6.14919	6.18726	6.12919	6.23814	6.18539	6.10908	6.1243	6.11053	6.086	5.97654	5.92517	5.88959	5.95612	5.71768	5.69277	5.69823	5.72113
874	6.17532	6.17708	6.20044	6.27682	6.3125	6.29238	6.24718	6.21199	6.26792	6.24117	6.18359	6.2485	6.23681	6.17158	6.16965	6.06826	6.15846	6.15852	6.21091	6.14828	6.1666	6.12183	6.23886	6.17753	6.08907	6.11663	6.09748	6.07034	5.96429	5.92044	5.88957	5.94507	5.69724	5.68068	5.69294	5.69052
876	6.17005	6.17053	6.19842	6.27463	6.30724	6.27756	6.23548	6.20461	6.26474	6.2289	6.1844	6.2348	6.22221	6.17477	6.16086	6.08363	6.16157	6.14924	6.18533	6.12988	6.16074	6.11539	6.24203	6.15881	6.08506	6.1084	6.08748	6.06378	5.95278	5.91289	5.89192	5.92678	5.67385	5.65927	5.66391	5.67764
878	6.16273	6.16405	6.19305	6.26173	6.30313	6.27062	6.2207	6.18979	6.26169	6.23428	6.18625	6.2206	6.19077	6.18222	6.14927	6.08122	6.15661	6.13866	6.16907	6.10355	6.15302	6.10536	6.24378	6.1188	6.08789	6.08604	6.07397	6.06059	5.94127	5.9044	5.88545	5.90437	5.6407	5.62993	5.61794	5.65974
880	6.14083	6.15724	6.17338	6.2415	6.28524	6.26119	6.2063	6.173	6.24249	6.23362	6.17041	6.20695	6.16473	6.17461	6.13159	6.04014	6.13435	6.12379	6.14912	6.08091	6.1388	6.08802	6.2299	6.0948	6.08185	6.06492	6.06315	6.05281	5.9107	5.87912	5.85811	5.88248	5.61559	5.60837	5.58992	5.64364
882	6.0997	6.14033	6.13586	6.21721	6.26222	6.24381	6.18175	6.14048	6.20738	6.20622	6.1236	6.19049	6.14092	6.12795	6.09729	5.98867	6.09056	6.09092	6.12571	6.04121	6.10175	6.03972	6.16992	6.08586	6.05417	6.03711	6.04071	6.02345	5.86948	5.84861	5.82606	5.84574	5.58609	5.57689	5.55804	5.61722
884	6.07467	6.11975	6.10552	6.17276	6.21526	6.19407	6.13951	6.11118	6.17301	6.16822	6.09285	6.16928	6.11678	6.08082	6.06525	5.96292	6.05683	6.06182	6.10551	6.01413	6.0578	6.00299	6.11494	6.07711	6.01916	6.00253	6.00935	5.98551	5.84185	5.82665	5.79623	5.82352	5.56025	5.54797	5.53062	5.58561
886	6.05647	6.07293	6.07806	6.13873	6.17306	6.1479	6.11019	6.08511	6.14937	6.1418	6.06732	6.15246	6.10148	6.058	6.03895	5.95183	6.02935	6.04177	6.09364	6.00176	6.03752	5.97807	6.09347	6.05969	5.99063	5.97594	5.9836	5.95847	5.81624	5.79635	5.75458	5.79887	5.5341	5.50904	5.5031	5.55442
888	6.04018	6.02864	6.04228	6.11079	6.15832	6.12296	6.07631	6.05578	6.11621	6.10397	6.04123	6.12079	6.07108	6.03926	6.01232	5.94464	6.00163	6.01959	6.07547	5.99034	6.01459	5.94898	6.07483	6.03055	5.9483	5.93238	5.94283	5.92466	5.79152	5.77461	5.72872	5.77078	5.49927	5.46416	5.46942	5.50488
890	6.01583	6.01749	6.02062	6.08441	6.14064	6.10478	6.04989	6.03689	6.08132	6.07491	6.02499	6.09401	6.04865	6.02314	5.99157	5.91098	5.98476	6.00707	6.05189	5.9765	5.99642	5.92767	6.06141	6.01291	5.9183	5.8997	5.91509	5.90353	5.76178	5.74165	5.69923	5.75087	5.47874	5.43722	5.44291	5.47562
892	5.97621	6.0092	6.00472	6.07241	6.12448	6.0959	6.03811	6.01133	6.05843	6.0593	6.00338	6.07391	6.03933	6.00501	5.96151	5.87429	5.96881	5.98324	6.02753	5.95138	5.97216	5.89305	6.03892	5.98105	5.89584	5.88744	5.8924	5.8754	5.72649	5.70996	5.67177	5.72447	5.44785	5.40348	5.39839	5.44947
894	5.95854	6.00131	5.9923	6.05471	6.09952	6.0796	6.02422	5.99159	6.04642	6.04853	5.99007	6.04788	6.0287	5.99199	5.93901	5.85529	5.9576	5.95878	6.00206	5.93459	5.94471	5.87312	6.02104	5.94713	5.87448	5.88107	5.86963	5.84178	5.70108	5.69379	5.65585	5.70588	5.41297	5.37991	5.36638	5.42244
896	5.95101	5.9786	5.97892	6.04449	6.07944	6.06733	6.01214	5.97858	6.04075	6.04568	5.97771	6.03351	6.01928	5.96603	5.92964	5.83617	5.93625	5.94703	5.99144	5.92252	5.92917	5.87389	6.01167	5.93422	5.86417	5.86326	5.85154	5.82727	5.67958	5.67716	5.63935	5.67506	5.3819	5.35946	5.3445	5.40091
898	5.94807	5.95798	5.96692	6.04149	6.06987	6.06086	6.00457	5.9679	6.02922	6.04302	5.96867	6.02422	5.99962	5.93605	5.92564	5.83582	5.91578	5.9382	5.98828	5.91196	5.92102	5.87697	6.00303	5.92777	5.85412	5.81771	5.82025	5.81322	5.66669	5.67064	5.63511	5.6474	5.34961	5.33873	5.32141	5.36663
900	5.95203	5.96795	5.96455	6.03903	6.05803	6.0575	6.00635	5.97027	6.02145	6.04342	5.97325	6.02507	5.98695	5.93529	5.93015	5.8641	5.92007	5.93831	5.99072	5.91121	5.92573	5.88191	6.00266	5.92844	5.84795	5.79851	5.80592	5.80865	5.65835	5.66694	5.64325	5.64362	5.33442	5.32253	5.31108	5.34853
902	5.95949	5.99723	5.9806	6.04927	6.06456	6.06663	6.0209	5.98299	6.03756	6.05159	5.98531	6.04066	5.99715	5.95883	5.94502	5.8903	5.93974	5.94707	6.00201	5.91677	5.93887	5.89893	6.01227	5.93998	5.8548	5.8341	5.82032	5.81668	5.65446	5.6665	5.65061	5.64614	5.32462	5.29336	5.29847	5.33949
904	5.97583	6.01906	6.00714	6.08219	6.10107	6.08632	6.04307	6.00004	6.0761	6.06394	5.99942	6.06288	6.02302	5.9843	5.95728	5.90706	5.95952	5.96104	6.02258	5.92673	5.95453	5.91744	6.02573	5.95904	5.87387	5.87695	5.84354	5.83052	5.66843	5.67759	5.65625	5.65544	5.31855	5.27914	5.29296	5.33418
906	6.02014	6.05007	6.04805	6.11685	6.14179	6.10738	6.07124	6.032	6.11728	6.09309	6.03714	6.08635	6.05552	6.02048	5.97789	5.93185	5.99763	5.99439	6.05451	5.94845	5.97895	5.95479	6.0535	5.98721	5.90315	5.89606	5.86458	5.84651	5.69947	5.70048	5.67043	5.681	5.31682	5.28307	5.29807	5.33977
908	6.07498	6.08796	6.10067	6.16799	6.18832	6.1583	6.13331	6.07868	6.16594	6.16046	6.08813	6.13382	6.10768	6.06922	6.01234	5.96835	6.04569	6.04832	6.10392	5.97825	6.0303	6.00202	6.09483	6.02998	5.94873	5.92227	5.89759	5.87464	5.73068	5.7272	5.69817	5.7111	5.31887	5.28893	5.30572	5.35566
910	6.13455	6.13896	6.15856	6.23299	6.25784	6.24384	6.19818	6.13366	6.2226	6.23255	6.15108	6.19165	6.16401	6.12456	6.05945	6.03403	6.10642	6.10449	6.15836	6.02044	6.08224	6.04349	6.13836	6.07569	5.99041	5.95665	5.93576	5.91248	5.77198	5.77869	5.75928	5.74618	5.32879	5.29554	5.31068	5.36947
912	6.2159	6.22148	6.24234	6.3134	6.33871	6.34104	6.28059	6.22229	6.30155	6.32065	6.24867	6.28475	6.24504	6.21203	6.13529	6.10843	6.20326	6.18468	6.22747	6.09676	6.16334	6.11251	6.21955	6.15428	6.0493	6.02872	6.00716	5.99963	5.83899	5.84584	5.83548	5.80471	5.36129	5.31327	5.31937	5.39581
914	6.32835	6.32606	6.35713	6.43913	6.46023	6.47152	6.39773	6.33315	6.41787	6.43647	6.36679	6.41738	6.35395	6.31487	6.23312	6.20854	6.31759	6.28319	6.3204	6.19168	6.27097	6.20385	6.32164	6.26007	6.13594	6.13303	6.10665	6.12096	5.93996	5.94389	5.93981	5.88271	5.40758	5.34365	5.34197	5.43442
916	6.52023	6.51198	6.53501	6.59393	6.62164	6.62867	6.54952	6.49464	6.57682	6.59429	6.54312	6.57449	6.49897	6.45978	6.39942	6.35951	6.48535	6.43441	6.4523	6.34849	6.40898	6.37116	6.47625	6.40025	6.27113	6.26518	6.2399	6.26318	6.08699	6.09721	6.0857	6.02103	5.48374	5.4221	5.41709	5.5061
918	6.7624	6.7532	6.77433	6.82086	6.84932	6.84025	6.77386	6.71244	6.81633	6.82854	6.77326	6.79309	6.72425	6.65943	6.62991	6.56085	6.70431	6.65438	6.64464	6.55984	6.61285	6.5981	6.69117	6.59835	6.48021	6.45641	6.43653	6.4546	6.26944	6.29169	6.26429	6.20324	5.59322	5.5378	5.53445	5.63556
920	7.04308	7.03681	7.06466	7.12371	7.16514	7.12884	7.05796	6.98117	7.12509	7.12408	7.06957	7.06972	7.00613	6.91738	6.89868	6.85471	6.96531	6.91757	6.89547	6.81164	6.8653	6.85115	6.93917	6.84961	6.73443	6.69563	6.6713	6.68677	6.50967	6.57136	6.51348	6.42833	5.73247	5.68486	5.67756	5.79482
922	7.40417	7.40712	7.45038	7.50708	7.55318	7.51016	7.43051	7.34568	7.50495	7.51273	7.47266	7.44237	7.37064	7.28013	7.24511	7.23857	7.30606	7.25839	7.23667	7.14561	7.20051	7.17459	7.2554	7.1936	7.0619	7.01134	6.97901	6.98564	6.83273	6.9383	6.84251	6.7338	5.93731	5.90094	5.88842	6.02389
924	7.90676	7.90424	7.98009	8.02773	8.0566	8.04312	7.93958	7.83607	8.00113	8.02978	8.00036	7.94842	7.8554	7.76312	7.71618	7.7446	7.77251	7.71195	7.71202	7.59006	7.64618	7.60703	7.67745	7.64651	7.49749	7.43355	7.38992	7.38274	7.27192	7.44057	7.30546	7.14343	6.21267	6.18418	6.16506	6.33422
926	8.65919	8.63301	8.74555	8.73342	8.7378	8.75541	8.65039	8.5396	8.69737	8.74579	8.75083	8.64571	8.52495	8.45029	8.40292	8.43212	8.47038	8.37288	8.38463	8.23436	8.27301	8.24309	8.30764	8.27534	8.10419	8.02368	7.97102	7.95624	7.88244	8.12787	7.93942	7.74127	6.62077	6.60332	6.56812	6.77577
928	9.66315	9.61444	9.78604	9.79374	9.76023	9.77508	9.69397	9.50166	9.71957	9.76663	9.75214	9.65529	9.47915	9.38741	9.33725	9.37964	9.42515	9.2905	9.34033	9.10562	9.16467	9.11176	9.18544	9.15439	8.95212	8.87089	8.80087	8.78836	8.70224	9.03435	8.79192	8.53426	7.19409	7.17204	7.12091	7.39932
930	11.084	11.0258	11.2199	11.2206	11.2088	11.17	11.0773	10.8377	11.1171	11.1491	11.1854	11.0001	10.7841	10.6942	10.6282	10.7505	10.7626	10.5563	10.6308	10.3399	10.3546	10.3389	10.3918	10.3595	10.0967	10.0104	9.91596	9.90597	9.83732	10.3196	10.0015	9.6443	7.98198	7.9639	7.892	8.21201
932	13.0139	12.9806	13.2356	13.1936	13.1592	13.1182	13.0703	12.7412	13.093	13.1716	13.1667	12.9777	12.7364	12.5814	12.4794	12.5584	12.6384	12.3963	12.4382	12.0967	12.0946	12.1037	12.1398	12.1467	11.7713	11.6947	11.5648	11.5635	11.3585	11.9543	11.5579	11.1636	9.10999	9.08088	9.00398	9.35858
934	15.6255	15.584	15.8762	15.8825	15.9355	15.8661	15.6918	15.255	15.7762	15.7977	15.7544	15.5714	15.3073	15.0542	14.9473	15.1229	15.1385	14.7998	14.9027	14.4237	14.3787	14.4327	14.421	14.48	13.9847	13.8917	13.703	13.7194	13.4503	14.229	13.7305	13.1654	10.5644	10.5491	10.4497	10.8168
936	19.2671	19.2641	19.4601	19.2781	19.3939	19.3053	19.136	18.8242	19.2858	19.3261	19.3553	18.9895	18.8086	18.5482	18.4175	18.4199	18.7008	18.2275	18.236	17.8161	17.6225	17.8583	17.7918	17.8014	17.0482	16.884	16.6843	16.7147	16.1847	17.0109	16.4006	15.9599	12.5958	12.6761	12.5442	12.8328
938	23.4316	23.4494	23.6704	23.9337	24.0756	23.9704	23.5741	23.069	23.819	23.7195	23.4017	23.3711	23.2532	22.7037	22.5623	22.4584	22.8813	22.3578	22.5576	21.7489	21.7503	21.8563	21.8362	21.918	20.8995	20.6975	20.4439	20.473	19.4588	20.1965	19.5807	19.1372	15.038	15.1335	15.0059	15.298
940	28.869	28.9981	28.7158	28.538	29.1124	28.8048	28.1586	28.3265	28.6891	28.4492	28.7523	27.9557	28.0244	27.9046	27.6406	27.2923	28.1188	27.4494	27.4222	26.8823	26.478	26.9714	26.8451	26.7278	25.2605	24.9701	24.7369	24.6667	23.318	23.8841	23.255	23.2248	17.9886	18.2255	18.0504	18.0876
942	33.4384	33.7998	33.5006	33.144	33.5066	33.3462	33.4259	33.5467	33.465	33.7096	33.3968	33.3901	33.4749	33.1992	32.7531	31.0144	33.1346	32.9263	32.4032	31.8375	32.3157	32.077	32.2407	32.2654	30.2677	30.2448	30.0179	29.7401	26.6611	26.2416	25.9284	26.9525	21.1973	21.2863	21.2209	21.3654
944	35.2996	35.3818	35.383	36.755	37.2832	36.9938	36.5468	35.6684	36.3997	36.2618	34.7814	36.4505	36.2985	35.279	35.1184	33.6346	35.3098	35.0852	35.4012	33.7282	35.1265	34.1811	34.3207	34.6823	32.8553	32.9779	32.5147	32.1029	28.7777	27.6688	27.9086	28.6964	22.8858	22.7817	22.8141	22.8534
946	36.3552	36.2116	35.727	36.9506	38.3175	37.624	36.4715	36.345	36.7982	36.1837	35.4669	36.3024	36.3468	35.9558	35.8984	35.0081	36.2521	35.5868	35.9498	34.703	35.2685	35.297	35.0427	34.9676	33.2346	33.0337	32.7287	32.1777	29.8191	28.4418	28.9747	29.806	23.6928	23.7272	23.7721	23.0644
948	36.1838	36.195	35.3842	35.2846	36.5181	36.1014	35.5794	36.2922	35.8789	35.5089	35.4865	35.5395	35.8186	36.0063	35.7883	33.9783	36.2389	35.6126	35.2235	34.9493	35.1903	35.664	35.3283	34.9248	33.0872	32.8126	32.8014	32.1245	29.3927	27.7299	28.2176	29.9447	23.956	24.0259	24.1456	23.1509
950	32.7406	32.852	32.7048	32.8601	33.3692	33.5221	33.7062	33.4933	33.466	33.4161	32.3073	33.7622	33.9288	33.3516	33.0544	30.5821	33.2525	33.2397	32.7894	31.9939	33.6452	32.814	32.9904	32.9976	31.3876	31.4079	31.5307	30.8504	27.1264	25.4143	25.8928	27.5009	22.737	22.4269	22.6832	22.3272
952	28.0304	27.9788	28.019	28.6803	29.2344	29.3334	29.0613	28.4366	28.9653	28.6336	27.565	28.9885	29.004	28.2727	28.1526	26.731	28.2604	28.1745	28.2071	27.0184	28.6713	27.7497	27.8836	28.0191	26.8896	26.9144	26.9542	26.4963	23.9186	22.88	23.2404	23.8373	19.9354	19.6404	19.8195	19.6331
954	23.6277	23.6671	23.5752	23.6506	24.079	24.1464	24.0274	23.831	24.0145	23.8636	23.4214	23.9408	24.0075	23.6777	23.5443	22.5179	23.6717	23.5757	23.3503	22.7083	23.7931	23.3575	23.4141	23.3504	22.4031	22.3549	22.4775	22.1739	20.4537	19.8681	20.0214	20.4505	17.2127	17.0675	17.1712	16.974
956	19.1817	19.297	19.364	19.5793	19.7237	19.82	19.723	19.3761	19.6998	19.6456	19.2001	19.6784	19.6347	19.1844	19.0889	18.5176	19.1523	19.1445	19.0625	18.3494	19.4356	18.8982	19.0353	19.0284	18.3715	18.3774	18.451	18.2579	17.0492	16.8601	16.8612	16.9111	14.4275	14.3132	14.3489	14.4383
958	15.7004	15.8084	15.8311	15.9221	16.0044	16.0057	15.8509	15.7295	15.952	15.9288	15.7991	15.8554	15.778	15.51	15.4366	15.2293	15.5311	15.448	15.388	14.8893	15.6013	15.307	15.4063	15.3226	14.8544	14.8318	14.8832	14.7703	14.1706	14.2546	14.1466	14.0144	12.0003	11.9986	11.9582	12.121
960	12.8501	12.9455	13.0256	13.0993	13.036	13.0542	13.0012	12.8911	13.0707	13.1151	12.9996	13.0325	12.932	12.7089	12.6126	12.4653	12.699	12.6514	12.5871	12.1862	12.7959	12.5031	12.6568	12.5975	12.2256	12.2285	12.2625	12.1959	11.7455	11.8983	11.7582	11.5781	10.0782	10.0863	10.0428	10.2786
962	10.6697	10.7299	10.8057	10.9169	10.8796	10.874	10.7629	10.6666	10.8561	10.861	10.8025	10.7824	10.6823	10.5226	10.4264	10.4176	10.5057	10.4465	10.4474	10.0891	10.5517	10.3105	10.4744	10.4318	10.1355	10.1551	10.1487	10.119	9.85921	10.0655	9.91402	9.66863	8.51865	8.53944	8.4873	8.72156
964	9.05939	9.11959	9.1672	9.23545	9.2135	9.20756	9.11496	9.06245	9.20346	9.21562	9.19041	9.13393	9.05225	8.94823	8.87015	8.83024	8.91274	8.88771	8.86714	8.60087	8.94978	8.76766	8.92501	8.8675	8.62166	8.6534	8.6381	8.61484	8.40511	8.56176	8.41244	8.28157	7.38774	7.39907	7.34546	7.55145
966	7.81997	7.87162	7.91483	8.00925	8.00204	7.98792	7.89861	7.83615	7.97096	7.98182	7.93082	7.91782	7.83977	7.73946	7.6895	7.64762	7.69539	7.70471	7.68737	7.45356	7.75161	7.57954	7.72805	7.66952	7.48913	7.5252	7.50423	7.46598	7.31058	7.42826	7.30625	7.20586	6.51369	6.49656	6.44133	6.62489
968	6.93148	6.97743	7.00359	7.05935	7.07457	7.04281	6.97763	6.94963	7.0348	7.0527	7.01941	6.99646	6.93147	6.86621	6.81731	6.76507	6.82564	6.83802	6.80814	6.63773	6.86059	6.73413	6.86539	6.79434	6.65597	6.67969	6.66228	6.61635	6.50985	6.60141	6.50655	6.43664	5.87189	5.85915	5.8079	5.93604
970	6.25388	6.29912	6.322	6.36924	6.38596	6.3499	6.30573	6.28718	6.35235	6.365	6.32032	6.32266	6.2651	6.21368	6.15798	6.09596	6.17276	6.18765	6.17503	6.02752	6.20656	6.10489	6.23079	6.16196	6.0551	6.0619	6.04659	6.01914	5.89959	5.96175	5.89967	5.84861	5.39467	5.3868	5.35135	5.44525
972	5.73745	5.77864	5.79273	5.84313	5.87154	5.83101	5.78279	5.7696	5.83486	5.83103	5.78407	5.79928	5.74753	5.70583	5.65684	5.60391	5.67476	5.68606	5.69806	5.56192	5.7015	5.62507	5.74448	5.67641	5.59416	5.58145	5.56926	5.5638	5.43732	5.48159	5.4427	5.40042	5.02776	5.02391	5.00451	5.06796
974	5.33014	5.3628	5.37013	5.42913	5.46682	5.42538	5.3751	5.35442	5.4276	5.41999	5.36213	5.39074	5.34823	5.30332	5.27467	5.21771	5.28902	5.29757	5.31845	5.20179	5.32002	5.25108	5.3656	5.30191	5.23589	5.21171	5.2058	5.20661	5.08373	5.10069	5.07978	5.05116	4.74013	4.73426	4.7332	4.77693
976	5.0043	5.02776	5.02768	5.09157	5.13144	5.09828	5.04962	5.02067	5.09702	5.09166	5.02457	5.05772	5.0294	4.98037	4.96938	4.90885	4.98148	4.98609	5.00464	4.90878	5.01493	4.95114	5.0591	4.99927	4.94587	4.9165	4.91595	4.91255	4.80803	4.81071	4.79146	4.77474	4.50657	4.50115	4.51415	4.54086
978	4.73742	4.75766	4.7534	4.81501	4.84912	4.82758	4.78863	4.75863	4.82346	4.82618	4.75491	4.78978	4.77211	4.7259	4.71395	4.65129	4.73593	4.73821	4.75232	4.65369	4.7685	4.71142	4.81987	4.75533	4.70874	4.68201	4.68614	4.67299	4.57623	4.57983	4.55086	4.55761	4.3277	4.32437	4.33778	4.35598
980	4.51194	4.52829	4.5258	4.59091	4.61878	4.60317	4.56979	4.53986	4.58831	4.60268	4.53014	4.57133	4.55671	4.51096	4.49188	4.44141	4.52815	4.52788	4.54759	4.42775	4.56233	4.50924	4.62194	4.55483	4.50792	4.48679	4.49501	4.4697	4.38598	4.39769	4.36339	4.37211	4.18213	4.17856	4.18646	4.20275
982	4.33862	4.3461	4.34613	4.40015	4.4211	4.4099	4.38148	4.36142	4.39144	4.41638	4.357	4.39075	4.3751	4.33278	4.30957	4.27732	4.35575	4.3526	4.37613	4.25387	4.39385	4.34567	4.4643	4.38739	4.34126	4.32384	4.33513	4.30168	4.24549	4.25924	4.2272	4.22815	4.07284	4.06618	4.06811	4.08216
984	4.20138	4.19609	4.20571	4.24993	4.25712	4.26041	4.23472	4.21279	4.24485	4.26573	4.2203	4.25285	4.22678	4.1854	4.1639	4.13953	4.2099	4.20984	4.23656	4.11795	4.26688	4.21198	4.33777	4.23704	4.2167	4.19755	4.2065	4.17448	4.13525	4.14275	4.1173	4.11044	3.99278	3.97399	3.97382	3.99856
986	4.08435	4.07287	4.08914	4.12836	4.13141	4.14855	4.11682	4.086	4.13112	4.13407	4.10425	4.13762	4.10018	4.06291	4.04334	4.02198	4.08536	4.08713	4.11669	4.00289	4.16037	4.09739	4.22675	4.10027	4.117	4.08787	4.09636	4.06774	4.04402	4.03824	4.02115	4.01411	3.9244	3.90033	3.89576	3.92938
988	3.97417	3.97019	3.98656	4.023	4.02812	4.05109	4.0159	3.98114	4.02984	4.02281	3.99428	4.03644	3.99212	3.96235	3.93826	3.91512	3.97599	3.97619	4.01474	3.9017	4.05887	3.99478	4.12612	4.00418	4.02617	3.99774	4.00002	3.97751	3.96126	3.92827	3.92305	3.93363	3.87174	3.84512	3.83735	3.86975
990	3.8711	3.87627	3.88698	3.92806	3.93687	3.9553	3.91348	3.88794	3.92951	3.92536	3.88777	3.93253	3.89193	3.86834	3.83948	3.82413	3.86977	3.86115	3.92365	3.808	3.94678	3.8963	4.02669	3.93254	3.93286	3.91157	3.90434	3.88625	3.88466	3.84321	3.84502	3.85821	3.81798	3.79074	3.78203	3.80398
992	3.7844	3.79283	3.7976	3.83649	3.8447	3.8546	3.81546	3.80657	3.83609	3.83851	3.80169	3.83457	3.80316	3.78628	3.75787	3.74594	3.77933	3.76669	3.84155	3.72926	3.84323	3.81817	3.93925	3.86331	3.84985	3.83246	3.81944	3.80411	3.81522	3.78774	3.78414	3.79791	3.77316	3.75305	3.74247	3.75079
994	3.70185	3.70701	3.71624	3.75771	3.76312	3.76753	3.73552	3.72751	3.75897	3.75508	3.72051	3.75407	3.72826	3.70458	3.68952	3.66937	3.69446	3.69224	3.76139	3.65224	3.75905	3.74754	3.85225	3.77303	3.77829	3.76305	3.74601	3.73444	3.74891	3.74004	3.72993	3.73292	3.72911	3.70825	3.69972	3.71503
996	3.64024	3.63621	3.6475	3.6795	3.68634	3.68581	3.6598	3.65387	3.68367	3.67152	3.65134	3.67601	3.66087	3.62848	3.62927	3.59631	3.63	3.62886	3.68071	3.59012	3.685	3.68613	3.7765	3.67801	3.70934	3.6942	3.67773	3.66858	3.69891	3.69939	3.68385	3.68088	3.68783	3.6709	3.66303	3.68183
998	3.58226	3.57801	3.58839	3.61138	3.61266	3.61964	3.60159	3.59052	3.61752	3.61222	3.58892	3.61763	3.6025	3.56551	3.57305	3.5233	3.58073	3.57663	3.61653	3.54428	3.62996	3.62785	3.72608	3.61914	3.65506	3.65402	3.63257	3.62429	3.65448	3.65211	3.63158	3.63386	3.66189	3.64614	3.64333	3.65927
1000	3.52473	3.5242	3.5299	3.55387	3.55735	3.57083	3.54767	3.5314	3.56294	3.56022	3.53274	3.56481	3.54438	3.50518	3.51309	3.46942	3.53205	3.5262	3.56033	3.4997	3.57389	3.56512	3.67807	3.57413	3.6055	3.61296	3.5872	3.57659	3.61654	3.61381	3.5944	3.58765	3.63745	3.61879	3.62376	3.63578
1002	3.47217	3.48147	3.48403	3.49817	3.5087	3.5201	3.49966	3.48394	3.516	3.51648	3.49346	3.51868	3.49658	3.46174	3.46525	3.42225	3.49322	3.4882	3.51014	3.45886	3.53209	3.52768	3.64218	3.54499	3.56706	3.58162	3.5534	3.53917	3.58136	3.57114	3.56305	3.55652	3.62589	3.60294	3.61076	3.62296
1004	3.41545	3.43349	3.44654	3.45898	3.47677	3.4804	3.46259	3.43708	3.47908	3.47828	3.45047	3.47893	3.4582	3.42411	3.42345	3.38011	3.45178	3.45146	3.47535	3.40785	3.49719	3.4962	3.59878	3.51419	3.53478	3.55316	3.52346	3.50999	3.54895	3.53153	3.53316	3.52343	3.61913	3.58205	3.5912	3.6135
1006	3.3779	3.39653	3.41286	3.42416	3.44775	3.43858	3.4265	3.39688	3.44024	3.4413	3.41643	3.43674	3.42054	3.39156	3.38531	3.34023	3.41188	3.41609	3.44489	3.36876	3.46295	3.46606	3.55761	3.47828	3.50569	3.51582	3.49214	3.48398	3.52649	3.509	3.50084	3.5049	3.61444	3.56934	3.5766	3.60241
1008	3.33903	3.3603	3.37419	3.39334	3.42029	3.40273	3.39389	3.35874	3.40055	3.41135	3.36965	3.40202	3.38457	3.35199	3.33607	3.29612	3.35276	3.37846	3.40904	3.33328	3.43034	3.4177	3.51371	3.4407	3.47751	3.4874	3.46796	3.46326	3.50054	3.48729	3.46504	3.48393	3.61104	3.5653	3.57028	3.59517
1010	3.30313	3.3254	3.33162	3.35052	3.38855	3.36713	3.34744	3.31921	3.35517	3.36814	3.32231	3.35899	3.34279	3.30561	3.28453	3.26185	3.3019	3.33303	3.36265	3.29592	3.38496	3.36422	3.46295	3.39278	3.44024	3.44742	3.43353	3.43045	3.47538	3.47254	3.44762	3.46222	3.61003	3.562	3.56516	3.58684
1012	3.26783	3.29355	3.29285	3.30566	3.33847	3.32684	3.30791	3.28579	3.31645	3.32957	3.28748	3.32155	3.31158	3.27489	3.25364	3.22584	3.27998	3.29454	3.32137	3.2583	3.35682	3.33622	3.43705	3.36222	3.41863	3.42095	3.4121	3.4035	3.45324	3.45189	3.43241	3.44368	3.60678	3.55917	3.56167	3.58453
1014	3.22861	3.25662	3.25148	3.2788	3.29972	3.29081	3.27485	3.24605	3.28188	3.2909	3.24674	3.28104	3.27492	3.24795	3.22706	3.19736	3.25865	3.24916	3.28708	3.20827	3.33712	3.31428	3.41318	3.33277	3.40231	3.39822	3.38597	3.36817	3.43937	3.43532	3.42089	3.4195	3.59501	3.55472	3.55757	3.58172
1016	3.2014	3.22951	3.22192	3.25178	3.26341	3.24917	3.23936	3.21439	3.24003	3.25529	3.21725	3.24067	3.23427	3.22669	3.20522	3.16862	3.23455	3.21941	3.25491	3.17947	3.31894	3.29695	3.39636	3.31013	3.38681	3.37721	3.36189	3.33758	3.42846	3.42381	3.40955	3.40744	3.58915	3.5564	3.55637	3.58077
1018	3.16463	3.19761	3.19561	3.22855	3.23869	3.22394	3.21303	3.18393	3.21595	3.22829	3.18367	3.2191	3.20518	3.19607	3.17862	3.13982	3.19726	3.19838	3.22545	3.15955	3.29556	3.26601	3.37032	3.29116	3.36549	3.35932	3.34602	3.3217	3.41544	3.412	3.39896	3.39364	3.60139	3.56893	3.56327	3.59194
1020	3.13695	3.17135	3.1711	3.19317	3.21295	3.203	3.18207	3.15682	3.19743	3.19276	3.15639	3.19437	3.18194	3.16554	3.14746	3.11892	3.16695	3.17559	3.19549	3.14223	3.26394	3.24105	3.34272	3.26961	3.33831	3.3348	3.32502	3.306	3.41052	3.41042	3.39379	3.38416	3.61865	3.58365	3.57284	3.61135
1022	3.10985	3.13986	3.14265	3.16353	3.18353	3.18354	3.15965	3.1361	3.17333	3.16449	3.13077	3.17446	3.169	3.1425	3.11702	3.08688	3.14383	3.15351	3.17408	3.11643	3.24607	3.23273	3.32939	3.25796	3.32778	3.32342	3.31461	3.29493	3.41098	3.41382	3.38631	3.38109	3.63215	3.6061	3.59048	3.62886
1024	3.083	3.10468	3.10825	3.14564	3.16255	3.1639	3.13417	3.11325	3.14278	3.13277	3.10406	3.14535	3.14925	3.11057	3.08906	3.0597	3.11183	3.12379	3.15563	3.08257	3.2329	3.22304	3.31017	3.24446	3.32082	3.31022	3.3056	3.27986	3.41074	3.41493	3.38222	3.38074	3.65538	3.63889	3.62278	3.65975
1026	3.05998	3.0843	3.08654	3.1266	3.13708	3.13722	3.10861	3.09324	3.12019	3.11213	3.08927	3.1194	3.13012	3.0902	3.07309	3.03713	3.0916	3.10757	3.13846	3.06678	3.22424	3.21779	3.30008	3.23152	3.31486	3.30015	3.30077	3.27176	3.41392	3.40873	3.38405	3.38297	3.68051	3.66262	3.64559	3.68708
1028	3.02695	3.06096	3.06791	3.10805	3.11693	3.11856	3.08357	3.06392	3.10919	3.09898	3.07155	3.09621	3.1083	3.06997	3.04537	3.01918	3.08068	3.09616	3.12178	3.05415	3.21922	3.21384	3.29747	3.21366	3.31535	3.29932	3.297	3.27951	3.4237	3.40509	3.38763	3.38736	3.71735	3.70009	3.67777	3.71876
1030	3.00868	3.04389	3.05008	3.07613	3.09338	3.0966	3.05516	3.04214	3.09236	3.0829	3.05539	3.06698	3.07685	3.05227	3.02151	3.01049	3.07513	3.08207	3.09962	3.04444	3.21437	3.2099	3.29622	3.19805	3.32091	3.30133	3.29441	3.29207	3.44031	3.41795	3.40155	3.39466	3.75632	3.73794	3.71485	3.75746
1032	2.99556	3.02165	3.0336	3.0525	3.07434	3.07947	3.04073	3.02399	3.07514	3.06937	3.03178	3.05239	3.05524	3.03256	3.01081	2.99877	3.06348	3.05876	3.08027	3.02709	3.21037	3.19931	3.29237	3.19732	3.32642	3.30811	3.30433	3.30032	3.47133	3.44582	3.42934	3.41999	3.80847	3.78929	3.76765	3.80571
1034	2.986	3.00313	3.01615	3.03314	3.06584	3.06736	3.02497	3.00728	3.0587	3.05334	3.01247	3.0416	3.03584	3.013	3.00418	2.98161	3.05186	3.03426	3.06712	3.00869	3.20689	3.18912	3.28759	3.20337	3.3359	3.32764	3.33076	3.31377	3.50554	3.47428	3.46031	3.45122	3.88392	3.85393	3.83729	3.88073
1036	2.98228	2.99928	3.00371	3.0187	3.05651	3.05404	3.01389	3.00474	3.04878	3.04627	3.00583	3.03652	3.02854	3.00425	2.99891	2.95307	3.04395	3.03086	3.0647	2.99756	3.20628	3.19093	3.28659	3.20648	3.34871	3.34744	3.35372	3.32655	3.53887	3.52062	3.50814	3.49338	3.96359	3.92609	3.91128	3.95699
1038	2.98078	2.99868	2.99439	3.01725	3.04956	3.04492	3.01026	3.00692	3.04928	3.04511	3.00044	3.03843	3.02591	2.99504	2.99445	2.93704	3.03378	3.0403	3.06918	2.98428	3.21407	3.19965	3.28555	3.20653	3.37237	3.37755	3.38356	3.34696	3.57987	3.57047	3.55299	3.55615	4.06837	4.02183	4.00487	4.05523
1040	2.97748	2.9943	2.99127	3.0159	3.03875	3.03536	3.00781	3.00428	3.05293	3.04466	2.99584	3.04102	3.02439	2.99167	2.99544	2.94049	3.02771	3.04656	3.07227	2.9793	3.2233	3.20608	3.28752	3.21084	3.39882	3.40703	3.41164	3.37079	3.63497	3.62827	3.60806	3.61149	4.18024	4.12381	4.10917	4.16742
1042	2.96712	2.98463	2.98843	3.01271	3.03007	3.03032	3.00897	2.99136	3.0517	3.04071	2.99026	3.03511	3.02399	2.99488	2.99658	2.94792	3.0215	3.03874	3.06972	2.98321	3.23171	3.21179	3.30217	3.22734	3.43666	3.43028	3.43448	3.40306	3.71201	3.70007	3.6753	3.67689	4.30185	4.24728	4.23467	4.2905
1044	2.95973	2.97915	2.98404	3.00937	3.02413	3.02039	3.01301	2.9798	3.03998	3.0326	2.98832	3.02192	3.01984	2.99941	2.99396	2.94732	3.01817	3.02882	3.07154	2.99011	3.24604	3.21972	3.32218	3.24984	3.49014	3.464	3.46365	3.45143	3.79592	3.77993	3.75391	3.74911	4.44298	4.39183	4.38094	4.43764
1046	2.95532	2.97827	2.97957	3.00926	3.0219	3.01218	3.01412	2.97818	3.03289	3.02897	2.99351	3.01971	3.0203	3.00242	2.99771	2.94425	3.01976	3.03347	3.0795	3.00213	3.26784	3.24365	3.3468	3.2731	3.5474	3.50936	3.50462	3.50501	3.89189	3.88879	3.86064	3.84485	4.6135	4.56799	4.55107	4.61147
1048	2.95562	2.97768	2.97947	3.01815	3.02724	3.02114	3.00665	2.97958	3.03778	3.02581	3.00123	3.02451	3.03448	3.00599	3.0081	2.94764	3.0246	3.04322	3.09728	3.01823	3.31468	3.28492	3.38631	3.31153	3.62885	3.58615	3.58291	3.5772	4.0106	4.01873	3.99009	3.96725	4.82846	4.7852	4.75908	4.83031
1050	2.96769	2.98252	2.98788	3.03106	3.03877	3.04002	3.00225	2.98387	3.04706	3.02922	3.01167	3.02976	3.04703	3.0155	3.01613	2.96304	3.03802	3.05409	3.12347	3.03359	3.37125	3.3324	3.43101	3.35787	3.72119	3.68042	3.67386	3.66408	4.17605	4.19223	4.16611	4.11592	5.09153	5.03885	5.01109	5.09558
1052	2.98719	2.99356	3.00558	3.04108	3.05045	3.05326	3.02114	3.00267	3.06344	3.05727	3.03026	3.04602	3.05906	3.03724	3.02733	2.9778	3.06763	3.08423	3.15613	3.06223	3.44864	3.40864	3.50805	3.43386	3.83232	3.80744	3.78966	3.77977	4.38714	4.40051	4.3718	4.31152	5.43538	5.35074	5.33193	5.43494
1054	2.99833	3.00296	3.02019	3.05821	3.07046	3.07358	3.05117	3.02083	3.08871	3.09035	3.04543	3.07085	3.0759	3.05542	3.03902	2.99222	3.09902	3.11211	3.18565	3.08491	3.53652	3.48887	3.59849	3.52472	3.96823	3.96383	3.93441	3.92306	4.62866	4.63666	4.59881	4.53638	5.84114	5.72565	5.71204	5.84625
1056	3.01127	3.0191	3.03044	3.07116	3.09246	3.09246	3.06344	3.03608	3.10764	3.10734	3.06681	3.08703	3.0996	3.07254	3.05298	3.0124	3.14608	3.1368	3.2041	3.1056	3.62109	3.57922	3.70289	3.61571	4.14082	4.12742	4.10463	4.08696	4.91224	4.92529	4.87332	4.80569	6.30178	6.19421	6.17058	6.33052
1058	3.02763	3.03511	3.04422	3.08818	3.11566	3.11305	3.07566	3.05212	3.12701	3.12491	3.09004	3.10854	3.13846	3.09669	3.07708	3.04098	3.19449	3.17063	3.22289	3.13106	3.72153	3.68869	3.82963	3.72602	4.36705	4.3152	4.3184	4.28568	5.25843	5.28952	5.2247	5.13609	6.86032	6.7679	6.73036	6.92434
1060	3.06407	3.06809	3.07275	3.10899	3.14343	3.13879	3.096	3.08075	3.15485	3.15393	3.12842	3.13467	3.1793	3.13128	3.12207	3.10459	3.24375	3.21831	3.25655	3.17394	3.8499	3.82834	3.97611	3.86507	4.63268	4.55456	4.57237	4.52704	5.69952	5.76733	5.68146	5.5574	7.56796	7.46977	7.41499	7.65277
1062	3.1126	3.11741	3.12261	3.14341	3.17625	3.17782	3.14829	3.13285	3.20985	3.21166	3.18225	3.18806	3.23579	3.18865	3.18725	3.16959	3.30902	3.29775	3.32082	3.24346	4.03609	4.01716	4.15655	4.04896	4.95346	4.88275	4.89297	4.83479	6.25362	6.35119	6.23841	6.08937	8.47346	8.35113	8.27551	8.57707
1064	3.15628	3.16005	3.16937	3.19665	3.22984	3.23861	3.21214	3.18284	3.27924	3.27409	3.23359	3.25243	3.29818	3.25474	3.24799	3.22815	3.39274	3.38817	3.40935	3.32515	4.26611	4.252	4.38135	4.27684	5.35045	5.29419	5.28821	5.2203	6.95367	7.09637	6.94371	6.74962	9.59655	9.45646	9.35918	9.71259
1066	3.20999	3.21331	3.22014	3.24721	3.28653	3.29463	3.27051	3.23878	3.3416	3.33587	3.29975	3.31515	3.36955	3.33891	3.32452	3.29519	3.51333	3.4995	3.51532	3.44112	4.55177	4.5635	4.68192	4.58306	5.86507	5.81872	5.79417	5.73482	7.8269	8.00884	7.80718	7.59958	11.053	10.9018	10.7969	11.173
1068	3.26913	3.27026	3.27759	3.314	3.3524	3.35544	3.33829	3.30295	3.41407	3.41043	3.37494	3.3928	3.46124	3.43388	3.41871	3.3815	3.65054	3.63133	3.64758	3.5752	4.91316	4.94142	5.0531	4.97209	6.51838	6.48031	6.42922	6.38998	8.90293	9.11201	8.87977	8.63075	12.8323	12.6414	12.5277	12.9563
1070	3.35266	3.34761	3.35307	3.38324	3.42784	3.42784	3.41112	3.39144	3.50409	3.5	3.47746	3.48108	3.57228	3.54633	3.53034	3.49903	3.81305	3.79338	3.80827	3.73403	5.38254	5.41868	5.52409	5.44896	7.34212	7.2846	7.22333	7.18801	10.2363	10.4482	10.1936	9.9415	15.0154	14.8193	14.6466	15.0716
1072	3.44246	3.43358	3.44306	3.46185	3.51927	3.52398	3.50396	3.50079	3.6201	3.61304	3.5946	3.59758	3.71297	3.67796	3.66019	3.63195	4.00587	3.99041	4.0049	3.91713	5.99402	5.98947	6.09841	6.03438	8.37768	8.28883	8.22842	8.17909	11.7995	11.9581	11.6961	11.4669	17.6159	17.3641	17.1489	17.6036
1074	3.52915	3.52589	3.53658	3.55434	3.63688	3.64017	3.60994	3.60947	3.75085	3.73855	3.71555	3.7249	3.86851	3.8282	3.81257	3.78293	4.22109	4.21105	4.22778	4.12344	6.66154	6.65329	6.7475	6.68881	9.53381	9.41434	9.34653	9.28303	13.6144	13.7322	13.4513	13.241	20.5091	20.2168	19.9965	20.386
1076	3.62554	3.63261	3.64331	3.6633	3.76461	3.76021	3.73505	3.72394	3.89084	3.88684	3.85171	3.87127	4.04431	4.01076	3.9934	3.94683	4.45981	4.46379	4.46812	4.35956	7.41824	7.41932	7.50092	7.4476	10.8505	10.7277	10.6508	10.5678	15.5415	15.5026	15.2327	15.1954	23.7482	23.4009	23.2479	23.5437
1078	3.74401	3.75021	3.7685	3.79513	3.90994	3.89708	3.87654	3.84971	4.04522	4.05102	4.00363	4.03294	4.23237	4.20478	4.18072	4.14318	4.70733	4.71298	4.71644	4.60387	8.17202	8.1658	8.24067	8.19838	12.1533	12.0325	11.9341	11.8237	17.4564	17.2596	17.0538	17.0656	26.9501	26.5346	26.4286	26.6797
1080	3.89612	3.89307	3.91749	3.93895	4.06492	4.05534	4.0291	4.00304	4.21634	4.22773	4.18058	4.19883	4.43077	4.41809	4.38157	4.35411	4.97031	4.96193	4.96622	4.86728	8.91733	8.94082	9.01369	8.95568	13.406	13.2817	13.1863	13.032	19.2524	18.8474	18.7174	18.921	30.1223	29.7052	29.6089	29.7107
1082	4.0583	4.05127	4.08097	4.10681	4.23278	4.24126	4.20083	4.17508	4.40213	4.41811	4.36888	4.37968	4.63977	4.63126	4.58905	4.54204	5.20997	5.2027	5.21267	5.11342	9.56297	9.52545	9.62473	9.58359	14.4616	14.3649	14.2502	14.0631	20.7393	20.1465	20.128	20.331	33.0275	32.52	32.4522	32.5065
1084	4.23565	4.23342	4.26323	4.29535	4.41794	4.4418	4.38798	4.35699	4.59344	4.61316	4.57045	4.57472	4.83972	4.82193	4.78022	4.7223	5.41554	5.42189	5.44013	5.33439	9.93704	9.93201	10.0087	9.93786	15.0284	14.8928	14.7971	14.6039	21.8929	21.227	21.2414	21.4804	35.6685	35.1769	35.096	34.9285
1086	4.44083	4.44577	4.47679	4.51032	4.62639	4.6543	4.59957	4.56345	4.79414	4.82165	4.7904	4.79587	5.04242	5.01091	4.97139	4.9141	5.61096	5.63423	5.64972	5.54118	10.2042	10.1882	10.2718	10.1786	15.3652	15.2096	15.1664	14.9646	22.3451	21.4589	21.4904	22.1027	37.8119	37.1442	37.1494	37.0554
1088	4.68818	4.69573	4.73015	4.76119	4.87652	4.89566	4.84446	4.80808	5.0235	5.06187	5.02944	5.04289	5.2674	5.22357	5.19079	5.13023	5.80767	5.84494	5.85074	5.72397	10.2729	10.1851	10.2913	10.2264	15.4082	15.2789	15.2368	15.0354	22.3073	21.3629	21.4457	21.9854	38.5666	37.8087	37.815	37.6623
1090	4.98746	4.99559	5.0368	5.05485	5.17322	5.17966	5.13126	5.09928	5.30061	5.34741	5.30139	5.32	5.51821	5.47149	5.44648	5.37988	6.01412	6.05424	6.05302	5.89864	10.1944	10.1058	10.2016	10.1609	15.0828	14.963	14.9186	14.6997	22.0131	21.1813	21.291	21.5843	38.863	38.1854	38.1631	37.6725
1092	5.34099	5.34774	5.40116	5.40645	5.52634	5.51921	5.47391	5.43617	5.63687	5.68145	5.63059	5.64273	5.81221	5.76566	5.74597	5.67316	6.25796	6.28878	6.28147	6.11871	10.1033	10.0321	10.1254	10.0866	14.5897	14.4639	14.4565	14.2117	21.3219	20.5048	20.598	20.9713	38.8256	38.0983	38.1386	37.5699
1094	5.7705	5.77304	5.83579	5.83358	5.94451	5.93419	5.89811	5.83603	6.04194	6.07698	6.04489	6.03426	6.18371	6.12117	6.11185	6.03192	6.56498	6.56524	6.56748	6.41031	10.0307	9.90772	10.0162	9.99273	14.0269	13.91	13.9019	13.678	20.2515	19.4519	19.54	19.8475	37.5778	36.635	36.7297	36.4695
1096	6.28667	6.28678	6.35362	6.37514	6.4646	6.46726	6.43051	6.3236	6.53961	6.56397	6.54023	6.51937	6.65199	6.56018	6.56045	6.48509	6.95755	6.91462	6.93813	6.77563	9.9652	9.83544	9.93708	9.91143	13.4344	13.3228	13.2942	13.1158	19.0885	18.4677	18.4759	18.6642	35.4714	34.6033	34.6341	34.3329
1098	6.93082	6.93688	6.99373	7.02323	7.10783	7.11707	7.06267	6.94299	7.15311	7.17535	7.14482	7.11508	7.22236	7.1345	7.11384	7.0528	7.48287	7.39861	7.41773	7.25688	10.0034	9.92073	10.0095	9.96569	13.0473	12.9486	12.8965	12.7379	17.8801	17.4376	17.3498	17.4428	32.9962	32.1304	32.1544	32.0173
1100	7.71163	7.72119	7.78626	7.81768	7.90392	7.90549	7.83849	7.71171	7.93582	7.95764	7.87644	7.8787	7.94336	7.86274	7.80122	7.73902	8.14919	8.0514	8.05323	7.86913	10.2102	10.1199	10.2173	10.1949	12.7868	12.6654	12.5801	12.4363	16.8738	16.6366	16.4798	16.3892	30.0398	29.2908	29.2335	29.2257
1102	8.69434	8.68446	8.76001	8.76209	8.88453	8.85578	8.75246	8.64035	8.89208	8.87768	8.80941	8.7797	8.80815	8.73198	8.65453	8.61188	8.98658	8.86066	8.86387	8.64366	10.5344	10.4762	10.5539	10.5401	12.7389	12.5825	12.502	12.3583	16.1125	15.9863	15.7714	15.7094	27.3182	26.6974	26.5932	26.6399
1104	9.8425	9.82678	9.91933	9.88531	10.0072	9.97329	9.87629	9.7757	10.0262	10.0085	9.93705	9.89732	9.91266	9.78383	9.71922	9.60424	10.0453	9.89724	9.8872	9.62784	11.2177	11.1704	11.2304	11.1991	12.9246	12.7952	12.7346	12.5708	15.594	15.5173	15.2954	15.2209	24.7643	24.2003	24.0761	24.2647
1106	11.0589	11.032	11.1033	11.1728	11.3482	11.278	11.0954	10.9781	11.2697	11.2045	11.0819	11.1069	11.1056	10.9091	10.8731	10.7566	11.2018	10.9954	11.0415	10.6887	12.0678	11.961	12.0193	12.0066	13.2505	13.1562	13.0926	12.9115	15.3524	15.236	15.0495	15.0093	22.5549	22.1024	21.9671	22.1688
1108	12.3695	12.3667	12.3336	12.3054	12.5607	12.4491	12.3108	12.3158	12.4764	12.4354	12.3277	12.3229	12.3494	12.2253	12.154	11.8553	12.5064	12.2691	12.2059	11.9561	13.0755	13.0025	13.0876	13.0246	13.808	13.6772	13.622	13.445	15.2032	15.0015	14.8512	14.8979	20.6918	20.3321	20.2207	20.4213
1110	13.2014	13.1916	13.2144	13.4192	13.6071	13.5389	13.4572	13.2818	13.5472	13.493	13.1023	13.4579	13.4695	13.1962	13.0991	12.6182	13.3972	13.2434	13.2223	12.7993	14.0009	13.7287	13.8903	13.8969	14.3664	14.2411	14.1682	14.0076	15.0439	14.7204	14.6349	14.7752	19.092	18.8063	18.7207	18.8957
1112	13.6912	13.6222	13.5444	13.9193	14.2538	14.1236	13.7901	13.6842	14.0244	13.7807	13.498	13.7613	13.8018	13.5794	13.514	13.1492	13.7831	13.5617	13.6804	13.1592	14.1708	14.0026	14.0743	14.0705	14.439	14.3217	14.2262	14.0642	14.7864	14.3842	14.3685	14.5726	17.7479	17.5091	17.4461	17.5545
1114	13.9069	13.835	13.6512	13.791	14.1934	14.0421	13.7589	13.8468	14.0115	13.7896	13.6995	13.7547	13.8429	13.7636	13.6892	13.2098	13.9537	13.7116	13.7101	13.3555	14.1733	14.1565	14.1651	14.0829	14.2814	14.1662	14.1084	13.9307	14.3855	13.9524	13.9827	14.2797	16.5696	16.343	16.3087	16.3643
1116	13.5301	13.5194	13.4233	13.496	13.7556	13.6973	13.6286	13.6166	13.7269	13.6366	13.3955	13.6608	13.7227	13.5629	13.4773	12.7818	13.6881	13.5615	13.458	13.1152	14.0764	13.9282	13.9953	13.9267	13.9575	13.8874	13.8826	13.6838	13.7694	13.3348	13.3665	13.7468	15.4109	15.192	15.1756	15.2221
1118	12.6866	12.6904	12.677	12.9282	13.117	13.0941	12.9905	12.7964	13.0395	12.929	12.5659	13.0088	12.9696	12.7162	12.6939	12.1375	12.8497	12.7433	12.7669	12.2857	13.2869	13.0418	13.1127	13.1105	13.1728	13.1377	13.114	12.9118	13.0054	12.6542	12.6744	12.9362	14.2642	14.0818	14.0652	14.0832
1120	11.8535	11.869	11.8153	11.9385	12.1431	12.1137	11.9971	11.9007	12.0634	11.9815	11.7725	11.9992	11.9439	11.8107	11.8004	11.3766	11.9423	11.8189	11.8127	11.4554	12.2474	12.1429	12.1776	12.1281	12.2227	12.1752	12.1568	11.966	12.1999	11.9286	11.9509	12.1227	13.2107	13.0637	13.0469	13.0526
1122	10.9535	10.9705	10.9701	11.0832	11.2138	11.2151	11.1394	10.9938	11.1651	11.1413	10.9358	11.1431	11.0801	10.9338	10.915	10.5799	10.9981	10.931	10.9175	10.5686	11.3541	11.2039	11.2838	11.2167	11.3467	11.3199	11.2936	11.1462	11.3886	11.2067	11.2229	11.2564	12.2445	12.1033	12.0878	12.1572
1124	10.2259	10.2368	10.242	10.3256	10.4431	10.4247	10.3326	10.2229	10.3884	10.3622	10.2458	10.3298	10.2826	10.1743	10.1348	9.91468	10.21	10.1442	10.1422	9.82325	10.519	10.3968	10.4891	10.3846	10.537	10.5152	10.4759	10.3783	10.6783	10.5935	10.5648	10.5335	11.4112	11.2928	11.2711	11.3786
1126	9.62992	9.64762	9.70158	9.77271	9.83626	9.82183	9.76163	9.64952	9.82299	9.81188	9.6837	9.76163	9.71519	9.59348	9.52872	9.33979	9.61205	9.56365	9.57316	9.25741	9.92834	9.76811	9.88682	9.81375	9.9231	9.91732	9.88393	9.80579	10.0705	10.0486	9.97807	9.94148	10.7316	10.624	10.6078	10.7402
1128	9.23011	9.24121	9.31029	9.38798	9.47572	9.43875	9.31967	9.22647	9.42143	9.39077	9.28572	9.32066	9.2845	9.16439	9.0848	8.95525	9.18826	9.12589	9.15356	8.85488	9.4615	9.30506	9.42088	9.37799	9.42647	9.42928	9.40552	9.33474	9.62433	9.6612	9.56237	9.50165	10.1734	10.0883	10.0668	10.1962
1130	9.02243	9.04381	9.1083	9.15422	9.23752	9.1976	9.09655	9.02565	9.19412	9.19882	9.08815	9.12192	9.08296	8.98265	8.8639	8.68357	8.96951	8.93184	8.91766	8.67918	9.21603	9.1061	9.21675	9.15774	9.1638	9.17312	9.15476	9.08403	9.3227	9.33712	9.22655	9.22402	9.7793	9.69809	9.6734	9.82961
1132	8.90411	8.92164	9.00724	9.13268	9.18676	9.15908	9.04916	8.92275	9.13162	9.13904	8.96148	9.08327	9.01149	8.88391	8.74572	8.59262	8.84049	8.82319	8.84744	8.56794	9.07669	8.98037	9.09081	9.03161	9.0479	9.04956	9.01396	8.93989	9.18521	9.20412	9.09649	9.03647	9.47478	9.39358	9.35223	9.54091
1134	8.951	8.9527	9.02552	9.16164	9.24707	9.19644	9.05185	8.93261	9.14824	9.1282	8.9921	9.07356	8.98866	8.88042	8.75416	8.67983	8.85671	8.81121	8.86409	8.57312	9.01947	8.97526	9.06505	8.99404	9.01802	8.99641	8.95455	8.87761	9.1979	9.25406	9.12601	9.03761	9.37437	9.33034	9.27021	9.41493
1136	9.18615	9.19263	9.24153	9.26439	9.38217	9.31278	9.2063	9.15555	9.29412	9.2929	9.24933	9.21023	9.14705	9.07876	8.97515	8.87746	9.09268	9.01761	9.0126	8.7758	9.17991	9.17327	9.2446	9.17911	9.17244	9.12153	9.10695	9.01672	9.30296	9.35789	9.21297	9.18155	9.41759	9.37391	9.31865	9.4659
1138	9.50585	9.51734	9.59987	9.64969	9.74353	9.69166	9.60977	9.50731	9.66243	9.67247	9.5874	9.59684	9.53125	9.40432	9.33143	9.19986	9.44155	9.36673	9.35917	9.06995	9.53653	9.46528	9.54193	9.53255	9.49846	9.43823	9.43957	9.33028	9.50392	9.54969	9.41874	9.38148	9.51119	9.44712	9.40473	9.57744
1140	10.0018	10.0062	10.073	10.1447	10.2773	10.2115	10.0803	9.97441	10.1403	10.1269	10.0675	10.0498	9.98938	9.85661	9.80302	9.67943	9.91611	9.81139	9.8255	9.51874	9.95113	9.90012	9.9722	9.94797	9.89284	9.82567	9.81407	9.70339	9.84562	9.91218	9.7814	9.72156	9.70553	9.66412	9.6131	9.74845
1142	10.5855	10.5961	10.6547	10.7343	10.8708	10.8106	10.6728	10.5605	10.726	10.7232	10.6365	10.6422	10.5896	10.4373	10.3865	10.2022	10.4938	10.3871	10.4021	10.0916	10.5016	10.4644	10.5596	10.4905	10.4076	10.3687	10.304	10.2203	10.2579	10.308	10.1822	10.1544	10.0241	9.98444	9.93739	10.04
1144	11.2333	11.2579	11.2857	11.3881	11.5516	11.4967	11.3068	11.204	11.395	11.3594	11.2529	11.2774	11.2286	11.07	11.0109	10.8002	11.1451	11.0229	11.0386	10.7041	11.1022	11.0734	11.1625	11.0825	10.9654	10.9402	10.828	10.7685	10.7282	10.7864	10.6595	10.6516	10.3731	10.3246	10.2774	10.3533
1146	11.8898	11.9447	11.9488	12.0768	12.2415	12.1938	12.0099	11.8982	12.1103	12.0593	11.8902	11.9974	11.9275	11.7689	11.6804	11.3934	11.8572	11.739	11.7275	11.365	11.8015	11.7436	11.8236	11.7666	11.5914	11.5653	11.4314	11.3856	11.2225	11.2238	11.1112	11.193	10.7773	10.725	10.671	10.7302
1148	12.4672	12.5027	12.5015	12.7375	12.9841	12.884	12.6191	12.4805	12.753	12.6344	12.4201	12.6042	12.5375	12.3546	12.2688	12.0173	12.4757	12.3165	12.3566	11.9274	12.4161	12.3277	12.3878	12.3541	12.1669	12.1091	11.984	11.9122	11.7236	11.6627	11.5931	11.6713	11.1587	11.0984	11.0516	11.081
1150	12.9704	12.9927	12.9331	13.0177	13.3479	13.2028	12.9659	12.9859	13.1234	13.0095	12.9025	12.9565	12.9837	12.8573	12.7685	12.4024	13.012	12.8032	12.7487	12.4608	12.9418	12.9078	12.9424	12.8642	12.6614	12.5501	12.5028	12.3508	12.1025	11.9364	11.8889	12.1166	11.554	11.4919	11.4809	11.4455
1152	13.0633	13.1038	13.0818	13.1634	13.4054	13.3135	13.1847	13.1884	13.2871	13.226	13.0222	13.1863	13.2606	13.0601	12.9581	12.3983	13.1816	13.0319	12.9203	12.6397	13.2928	13.1302	13.2152	13.1658	12.9647	12.8553	12.8592	12.6446	12.2092	11.904	11.8977	12.2317	11.7714	11.6514	11.6822	11.6968
1154	12.8384	12.8489	12.8555	13.1735	13.3679	13.3005	13.117	12.9854	13.2099	13.0958	12.7347	13.1071	13.1447	12.8489	12.7795	12.2365	12.962	12.8391	12.8367	12.3988	13.1718	12.9105	13.023	13.0157	12.8665	12.7756	12.7519	12.5431	12.1682	11.7779	11.8454	12.0959	11.7608	11.6382	11.6601	11.6658
1156	12.4492	12.4222	12.3244	12.5932	12.9073	12.8137	12.5505	12.4912	12.6808	12.5212	12.2634	12.5263	12.5814	12.3753	12.33	11.8609	12.5097	12.3594	12.3597	11.9611	12.6624	12.4927	12.5855	12.5174	12.4228	12.3283	12.3042	12.1073	11.9576	11.5421	11.6471	11.8565	11.6793	11.5864	11.5899	11.5122
1158	11.655	11.6475	11.5564	11.6846	11.917	11.9132	11.7804	11.7263	11.8309	11.7731	11.5058	11.7759	11.84	11.6501	11.6003	11.0502	11.7446	11.6624	11.5851	11.2619	12.0054	11.8348	11.9306	11.8547	11.7992	11.7394	11.7259	11.5417	11.3977	10.9922	11.0709	11.3341	11.4416	11.3221	11.339	11.2723
1160	10.6075	10.5986	10.5705	10.7451	10.9188	10.9487	10.7912	10.685	10.8334	10.7819	10.499	10.7961	10.8336	10.614	10.5825	10.1525	10.6924	10.6353	10.6235	10.2564	11.0314	10.8527	10.9035	10.8905	10.9023	10.8689	10.843	10.6888	10.6802	10.3831	10.4297	10.58	10.9309	10.7926	10.8005	10.8053
1162	9.61294	9.62514	9.60795	9.70609	9.85488	9.87033	9.73462	9.68448	9.80141	9.75888	9.56555	9.75136	9.78203	9.61785	9.58459	9.22103	9.69532	9.63753	9.60844	9.30836	10.0265	9.89958	9.9292	9.92082	9.97741	9.94452	9.93014	9.80431	9.9434	9.72044	9.74579	9.8687	10.4249	10.3067	10.2969	10.3179
1164	8.61823	8.65083	8.67564	8.77856	8.89017	8.88714	8.7802	8.68851	8.85401	8.81212	8.63719	8.78278	8.80629	8.64278	8.60115	8.32735	8.71938	8.67255	8.65474	8.35725	9.08247	8.91664	8.98518	8.98282	9.10661	9.08082	9.06195	8.96698	9.22155	9.0688	9.07124	9.13754	9.92322	9.8036	9.78403	9.84013
1166	7.77989	7.8128	7.83753	7.91704	8.02994	7.98127	7.89874	7.8194	7.97918	7.94662	7.82713	7.88231	7.91596	7.78904	7.73516	7.53778	7.86578	7.82202	7.78768	7.54539	8.2163	8.08019	8.16252	8.13475	8.31492	8.2948	8.26657	8.19604	8.5855	8.49236	8.454	8.49581	9.47082	9.36681	9.34009	9.39907
1168	7.04461	7.07477	7.10641	7.19543	7.2871	7.22654	7.17207	7.0964	7.22712	7.21168	7.09955	7.16439	7.18258	7.06109	6.99478	6.84451	7.11828	7.09207	7.05464	6.85012	7.49327	7.37537	7.4708	7.41914	7.65791	7.65626	7.62176	7.56126	8.03506	7.9744	7.90714	7.91323	9.07988	8.98339	8.96322	9.03741
1170	6.46986	6.49101	6.51171	6.57996	6.66732	6.61005	6.55241	6.51345	6.60127	6.58855	6.5225	6.56447	6.56543	6.47152	6.40393	6.30758	6.52266	6.48935	6.46386	6.29283	6.87878	6.81418	6.90522	6.82311	7.11336	7.11074	7.07951	7.02618	7.60317	7.55836	7.4877	7.46648	8.75992	8.67268	8.65753	8.72411
1172	6.03158	6.03997	6.0631	6.10276	6.16453	6.13206	6.09286	6.06052	6.13843	6.1464	6.08831	6.1179	6.11511	6.03451	5.97617	5.885	6.07121	6.05324	6.03942	5.86291	6.44744	6.40394	6.49151	6.42046	6.73311	6.72376	6.69503	6.64906	7.2682	7.20392	7.14855	7.15372	8.54029	8.44268	8.437	8.48602
1174	5.6901	5.69038	5.71485	5.75984	5.80956	5.7935	5.74906	5.69946	5.80025	5.81719	5.7439	5.77571	5.7735	5.69042	5.65206	5.55978	5.72203	5.71592	5.73024	5.52839	6.12247	6.08283	6.1638	6.12131	6.45412	6.44188	6.40003	6.36287	7.00159	6.92267	6.88937	6.90103	8.36932	8.25261	8.25534	8.28852
1176	5.41399	5.43345	5.45412	5.49583	5.54374	5.5309	5.48676	5.43299	5.53322	5.55462	5.46896	5.51282	5.51231	5.42872	5.40274	5.28379	5.4759	5.46202	5.48488	5.30784	5.87957	5.84002	5.91278	5.87948	6.23829	6.22712	6.17416	6.13857	6.78063	6.68821	6.67851	6.67105	8.21424	8.08985	8.0938	8.1151
1178	5.19448	5.23329	5.25148	5.29004	5.34983	5.32924	5.27553	5.22271	5.32695	5.33099	5.24698	5.30227	5.30252	5.21878	5.20013	5.0844	5.28827	5.25161	5.28004	5.14306	5.68126	5.64319	5.70644	5.66643	6.05427	6.04757	5.98542	5.95522	6.60426	6.49894	6.49734	6.46771	8.06096	7.93451	7.93919	7.95497
1180	5.05853	5.09623	5.10571	5.11948	5.19396	5.16429	5.10921	5.07406	5.17538	5.16518	5.10285	5.1393	5.1412	5.08306	5.06867	4.96115	5.15584	5.10938	5.13144	5.022	5.53818	5.50225	5.56318	5.5204	5.90736	5.89836	5.84038	5.808	6.45987	6.34491	6.33362	6.3207	7.90831	7.78427	7.78336	7.796
1182	4.96317	4.99042	4.99482	5.01162	5.0737	5.04517	4.99939	4.96721	5.06947	5.0559	4.99782	5.02962	5.02502	4.99001	4.98459	4.86532	5.05867	5.02021	5.03792	4.91872	5.45306	5.39351	5.46322	5.42423	5.78957	5.78149	5.74119	5.6855	6.32258	6.20117	6.18344	6.19753	7.7432	7.61741	7.60528	7.62611
1184	4.88273	4.90189	4.89797	4.93389	4.98129	4.95589	4.9149	4.88448	4.98438	4.96817	4.90575	4.94024	4.93203	4.91065	4.91051	4.77332	4.97145	4.94791	4.96359	4.83155	5.37812	5.29705	5.37699	5.33828	5.68113	5.67572	5.65069	5.57316	6.17186	6.04723	6.03922	6.06866	7.56025	7.437	7.41553	7.43977
1186	4.80043	4.81601	4.80358	4.85877	4.89514	4.87623	4.84002	4.80773	4.89818	4.87896	4.8111	4.85339	4.84945	4.81877	4.82221	4.67456	4.88081	4.874	4.87669	4.74486	5.27756	5.20131	5.2873	5.23508	5.56738	5.55424	5.53502	5.46072	6.00342	5.87958	5.8896	5.91469	7.33716	7.22834	7.20011	7.21982
1188	4.71371	4.72404	4.71124	4.76313	4.79745	4.7863	4.75472	4.72131	4.79809	4.77564	4.71549	4.76084	4.76623	4.71768	4.71771	4.57791	4.77856	4.78295	4.7708	4.65355	5.13306	5.09756	5.18724	5.1007	5.43335	5.39911	5.38201	5.33791	5.82778	5.71441	5.72164	5.74713	7.08107	6.99572	6.95995	6.96025
1190	4.60738	4.60875	4.60586	4.65316	4.68412	4.68035	4.65666	4.61834	4.68795	4.66369	4.6117	4.66043	4.67217	4.6195	4.60315	4.4764	4.67049	4.67462	4.66281	4.55385	4.99445	4.96357	5.06559	4.96732	5.2807	5.23574	5.22948	5.19675	5.63777	5.53481	5.52683	5.56689	6.82594	6.74091	6.70864	6.70116
1192	4.48282	4.47257	4.47759	4.52408	4.56531	4.56094	4.53054	4.49591	4.56162	4.5342	4.49375	4.53341	4.54485	4.5053	4.47671	4.36225	4.55226	4.53493	4.5435	4.43139	4.85403	4.79852	4.91035	4.82492	5.09979	5.06094	5.07056	5.0171	5.43788	5.34871	5.3367	5.37242	6.55596	6.46182	6.43603	6.4206
1194	4.33493	4.32986	4.33409	4.36894	4.42301	4.41734	4.3857	4.36276	4.41696	4.39634	4.3568	4.39038	4.40151	4.36885	4.33899	4.21473	4.41046	4.38688	4.40634	4.29519	4.70073	4.63277	4.74247	4.66849	4.90865	4.88106	4.89938	4.82931	5.22843	5.14237	5.13955	5.16936	6.27945	6.188	6.16948	6.15738
1196	4.16261	4.1728	4.17221	4.21613	4.26781	4.26291	4.22739	4.20298	4.25714	4.23772	4.18587	4.2369	4.24181	4.19193	4.1741	4.06098	4.23704	4.22023	4.25332	4.13139	4.51045	4.44882	4.54341	4.47359	4.6991	4.69421	4.70025	4.62949	5.01859	4.93963	4.94317	4.95203	5.98861	5.90341	5.89863	5.91449
1198	4.00307	4.01481	4.00694	4.05306	4.09888	4.09226	4.0568	4.03687	4.09195	4.06962	4.02392	4.0715	4.07168	4.01877	4.0063	3.91681	4.06746	4.05439	4.08256	3.97334	4.31246	4.27367	4.3582	4.27925	4.49356	4.51008	4.50093	4.43342	4.81923	4.75241	4.7481	4.75639	5.72974	5.65633	5.65325	5.68964
1200	3.84698	3.84732	3.83926	3.89793	3.93725	3.93082	3.89294	3.8604	3.92849	3.91108	3.86057	3.91158	3.91435	3.8579	3.83963	3.77639	3.89657	3.89337	3.9156	3.81519	4.14139	4.09872	4.19352	4.10787	4.3258	4.33396	4.32431	4.26225	4.63429	4.57824	4.5653	4.56831	5.50749	5.43438	5.42347	5.48025
1202	3.70557	3.69935	3.68929	3.7435	3.78687	3.77246	3.72849	3.70092	3.76196	3.75914	3.71582	3.75122	3.76102	3.71045	3.68617	3.64576	3.74446	3.74278	3.76019	3.67152	3.98342	3.94148	4.04124	3.9511	4.17911	4.16042	4.15963	4.10376	4.47483	4.43162	4.41159	4.40692	5.31991	5.25263	5.23027	5.28853
1204	3.57129	3.5704	3.56661	3.60395	3.64346	3.62594	3.59134	3.57957	3.62	3.63169	3.58605	3.61424	3.62227	3.58212	3.55473	3.52327	3.6128	3.61153	3.62612	3.54174	3.85127	3.81127	3.90294	3.82356	4.03933	4.01287	4.02785	3.97466	4.33152	4.29743	4.27315	4.2677	5.17012	5.10393	5.08388	5.13658
1206	3.45087	3.455	3.45474	3.47831	3.51205	3.4998	3.47422	3.4734	3.50499	3.51787	3.46948	3.48944	3.48927	3.46286	3.43586	3.40667	3.4979	3.49151	3.50289	3.4219	3.72922	3.69516	3.77706	3.71331	3.90138	3.87549	3.9102	3.85668	4.21321	4.18437	4.15822	4.15229	5.04678	4.98517	4.96657	5.00476
1208	3.34379	3.35241	3.35115	3.36751	3.39119	3.3897	3.37615	3.36882	3.40714	3.41268	3.36754	3.38491	3.37866	3.35112	3.32188	3.28243	3.39167	3.38871	3.38966	3.31545	3.62043	3.58967	3.68157	3.61271	3.79802	3.77304	3.8103	3.76784	4.12031	4.0738	4.05566	4.05761	4.97272	4.90685	4.88438	4.92347
1210	3.24735	3.2595	3.25752	3.27879	3.30362	3.30378	3.28796	3.26286	3.31772	3.3047	3.27262	3.2979	3.28423	3.24774	3.21675	3.18211	3.29143	3.29424	3.2942	3.2151	3.51249	3.48772	3.59725	3.51031	3.7181	3.69371	3.71175	3.69029	4.0493	4.00391	3.98604	3.97859	4.91244	4.84024	4.81202	4.86266
1212	3.16605	3.18058	3.17848	3.2	3.23282	3.22621	3.20769	3.17765	3.23784	3.21382	3.18962	3.22196	3.20516	3.16586	3.14195	3.11294	3.22028	3.21842	3.21976	3.14218	3.43343	3.41215	3.52409	3.43139	3.66435	3.64417	3.63967	3.63333	3.99836	3.9575	3.93304	3.93254	4.88547	4.82098	4.79185	4.83537
1214	3.09047	3.10196	3.10631	3.14161	3.17064	3.16432	3.13388	3.10113	3.17248	3.14988	3.10683	3.14545	3.13522	3.08914	3.07314	3.05687	3.15977	3.15207	3.16105	3.07636	3.37882	3.34264	3.43856	3.36712	3.6311	3.61445	3.59169	3.58031	3.96564	3.92389	3.89723	3.89527	4.8853	4.82444	4.80234	4.84277
1216	3.03323	3.03933	3.04967	3.08549	3.10732	3.10032	3.06298	3.03969	3.11405	3.09613	3.05117	3.07066	3.07278	3.03312	3.02462	3.0044	3.10668	3.09625	3.10783	3.02989	3.33394	3.3043	3.38127	3.31636	3.60586	3.5875	3.5574	3.53207	3.95229	3.90273	3.87655	3.87911	4.89366	4.83455	4.81478	4.85607
1218	2.97637	2.98023	2.9988	3.03682	3.05216	3.04171	3.01452	2.98323	3.05969	3.04398	3.00612	3.01979	3.02776	2.99759	2.98805	2.95732	3.04722	3.04327	3.05724	2.98866	3.29662	3.28011	3.35482	3.28543	3.58191	3.55733	3.54059	3.50963	3.94624	3.88188	3.86456	3.86889	4.92212	4.87287	4.84808	4.86931
1220	2.93054	2.93705	2.95105	2.98206	3.00326	2.98576	2.96987	2.93454	3.00475	2.98628	2.97074	2.97228	2.98377	2.96724	2.95871	2.91884	2.9961	2.9953	3.01084	2.95436	3.25762	3.25797	3.334	3.25994	3.55317	3.52063	3.52398	3.48149	3.94793	3.88001	3.86871	3.86294	4.96191	4.90796	4.88451	4.89122
1222	2.88935	2.90398	2.91267	2.93503	2.9521	2.93693	2.93129	2.89449	2.956	2.94374	2.93254	2.93583	2.94636	2.93063	2.92836	2.87877	2.95482	2.95891	2.97463	2.92269	3.23496	3.224	3.31261	3.23735	3.53366	3.50713	3.50707	3.4643	3.95463	3.88947	3.87709	3.87105	4.99572	4.92905	4.91317	4.90717
1224	2.85157	2.87241	2.87634	2.89453	2.90423	2.89873	2.88785	2.85359	2.91586	2.90501	2.89215	2.89169	2.90385	2.88395	2.88739	2.84663	2.91825	2.91935	2.93775	2.88594	3.20895	3.17819	3.28266	3.19496	3.51281	3.49627	3.47676	3.44804	3.94635	3.87779	3.86549	3.87679	5.02379	4.94557	4.94387	4.92422
1226	2.80903	2.83502	2.83067	2.84985	2.85516	2.85719	2.84689	2.81769	2.88155	2.86927	2.85054	2.8546	2.86842	2.84143	2.8451	2.80535	2.88519	2.88256	2.89902	2.85025	3.1803	3.14313	3.25352	3.15533	3.48952	3.47536	3.44659	3.42831	3.90888	3.80836	3.81942	3.84576	5.00437	4.91942	4.9237	4.9141
1228	2.76148	2.78977	2.77295	2.80592	2.81887	2.82007	2.79815	2.77883	2.8364	2.82372	2.7996	2.81752	2.82837	2.79511	2.79542	2.76524	2.84309	2.82989	2.8541	2.8062	3.12776	3.0961	3.20503	3.1096	3.44351	3.42194	3.39844	3.38201	3.852	3.73882	3.76839	3.77963	4.91863	4.83987	4.8358	4.83269
1230	2.72354	2.75031	2.73325	2.75517	2.78176	2.77945	2.74896	2.74244	2.78593	2.77823	2.75835	2.77947	2.78833	2.76136	2.75727	2.71778	2.80481	2.79168	2.81189	2.77503	3.07633	3.05605	3.15945	3.07014	3.3869	3.35641	3.34578	3.33069	3.77476	3.68058	3.7002	3.71418	4.81102	4.7418	4.73027	4.72419
1232	2.68199	2.69841	2.69854	2.71945	2.75006	2.74414	2.7098	2.69622	2.74753	2.7388	2.71035	2.74707	2.74691	2.72507	2.71786	2.67823	2.76431	2.76582	2.78787	2.74001	3.03547	3.0066	3.1037	3.02515	3.31225	3.28505	3.28386	3.26816	3.67685	3.61711	3.61678	3.6266	4.66888	4.58967	4.57461	4.58338
1234	2.6571	2.66609	2.66731	2.6859	2.71567	2.70391	2.67115	2.66197	2.71395	2.7021	2.68011	2.70828	2.70426	2.69388	2.68536	2.64123	2.73787	2.74488	2.76845	2.70925	2.99224	2.96919	3.05132	2.97384	3.23012	3.20776	3.21509	3.19464	3.57822	3.53806	3.52382	3.53894	4.50839	4.43177	4.40982	4.41881
1236	2.6318	2.64335	2.63424	2.65962	2.68204	2.66997	2.64952	2.63582	2.68537	2.67485	2.65268	2.67735	2.67414	2.66904	2.66328	2.60325	2.71423	2.71729	2.74092	2.6683	2.94136	2.92714	3	2.91579	3.15933	3.1493	3.15128	3.13032	3.48113	3.4444	3.42772	3.43999	4.33059	4.26862	4.24259	4.26605
1238	2.61552	2.62757	2.60588	2.63079	2.64999	2.63945	2.62624	2.61178	2.65513	2.64806	2.6331	2.64206	2.64485	2.64768	2.64419	2.58315	2.68679	2.68205	2.69821	2.63376	2.87479	2.88188	2.94997	2.85481	3.08876	3.08862	3.0774	3.06178	3.40133	3.36573	3.35173	3.35065	4.15086	4.11129	4.08246	4.1118
1240	2.60238	2.60326	2.58945	2.60969	2.62061	2.61524	2.60927	2.59426	2.63255	2.635	2.6178	2.62306	2.62665	2.62653	2.61557	2.57019	2.65159	2.64612	2.65732	2.60697	2.83196	2.82947	2.90959	2.82436	3.03921	3.03307	3.0235	3.00459	3.32518	3.28779	3.27857	3.27099	4.00868	3.96633	3.94884	3.97543
1242	2.58961	2.58049	2.58028	2.59972	2.61024	2.60307	2.59022	2.58015	2.61771	2.62402	2.60356	2.60854	2.60681	2.60041	2.58273	2.56249	2.62157	2.60495	2.62554	2.58202	2.79522	2.7723	2.86738	2.79969	2.98567	2.97473	2.96953	2.94605	3.24847	3.21572	3.20946	3.19784	3.88435	3.82845	3.82573	3.84304
1244	2.5695	2.57085	2.57343	2.59101	2.60101	2.59252	2.57827	2.56169	2.60729	2.61446	2.58773	2.59875	2.59387	2.57978	2.56834	2.5452	2.61076	2.5875	2.60578	2.57472	2.77161	2.74455	2.84145	2.77897	2.9363	2.93065	2.92476	2.90208	3.16845	3.13908	3.12965	3.12789	3.76443	3.70839	3.70782	3.72762
1246	2.54554	2.56061	2.55927	2.58686	2.59259	2.58732	2.57057	2.53339	2.5993	2.60087	2.56426	2.59042	2.58163	2.55346	2.55959	2.52586	2.59814	2.58094	2.59077	2.56792	2.74752	2.71934	2.81023	2.74451	2.88849	2.88858	2.87598	2.86134	3.0956	3.07426	3.06285	3.05791	3.6388	3.59226	3.58754	3.61858
1248	2.53534	2.5484	2.54676	2.58046	2.58137	2.58675	2.56202	2.52629	2.5891	2.58569	2.5518	2.58279	2.5724	2.54096	2.55205	2.50052	2.58778	2.57458	2.58107	2.56075	2.72747	2.70657	2.78906	2.71461	2.8538	2.85386	2.8386	2.82987	3.03909	3.00874	3.00266	3.01109	3.53652	3.50014	3.49301	3.52238
1250	2.52387	2.52502	2.53376	2.56966	2.57252	2.58289	2.55609	2.53133	2.57672	2.57403	2.53751	2.57255	2.57628	2.53835	2.54525	2.4833	2.57784	2.56205	2.58045	2.54351	2.69962	2.69457	2.7621	2.68669	2.82151	2.82547	2.8146	2.79807	2.99723	2.95552	2.95754	2.96683	3.45452	3.4159	3.4086	3.4287
1252	2.51775	2.51497	2.52902	2.54647	2.56096	2.56497	2.54721	2.5335	2.56139	2.564	2.5309	2.55699	2.58235	2.53568	2.54062	2.48548	2.57284	2.55245	2.58388	2.53429	2.66917	2.68774	2.74464	2.66713	2.79224	2.7979	2.79539	2.76684	2.96327	2.92122	2.92553	2.93543	3.38581	3.3488	3.34314	3.34678
1254	2.51335	2.51785	2.53114	2.53815	2.55277	2.55257	2.53705	2.53705	2.55628	2.55614	2.52953	2.54658	2.57117	2.5279	2.53041	2.49043	2.57034	2.54541	2.58222	2.5297	2.65749	2.6818	2.74769	2.66399	2.77927	2.7797	2.77826	2.75048	2.93106	2.88966	2.89559	2.90178	3.32213	3.28812	3.28474	3.28912
1256	2.51152	2.52302	2.53183	2.55192	2.55488	2.55471	2.52576	2.53862	2.55149	2.55097	2.52964	2.53327	2.54921	2.52186	2.51893	2.49099	2.56835	2.53799	2.56382	2.52535	2.6476	2.67502	2.75269	2.6628	2.77182	2.7574	2.75766	2.7358	2.90192	2.86965	2.86976	2.87516	3.2645	3.23528	3.23132	3.23729
1258	2.51097	2.52751	2.52868	2.56131	2.55591	2.55888	2.52668	2.53085	2.54395	2.55464	2.52581	2.53048	2.53887	2.5185	2.51036	2.49485	2.56126	2.53773	2.54801	2.51904	2.64468	2.65959	2.74909	2.65812	2.75937	2.74303	2.74454	2.72423	2.86929	2.84589	2.84101	2.84482	3.21221	3.18147	3.17842	3.1908
1260	2.50988	2.53018	2.52742	2.55429	2.55841	2.55482	2.53815	2.52116	2.5397	2.56305	2.52087	2.53981	2.52782	2.5147	2.50231	2.49485	2.55133	2.5428	2.55308	2.51199	2.6434	2.63872	2.74264	2.64615	2.73056	2.72761	2.72339	2.70589	2.84473	2.82623	2.81881	2.8164	3.15589	3.12817	3.12269	3.13626
1262	2.50274	2.522	2.52445	2.54659	2.56659	2.54718	2.54446	2.51357	2.53914	2.5639	2.51871	2.54595	2.52249	2.50592	2.49773	2.48528	2.5393	2.5395	2.56446	2.50573	2.63651	2.62414	2.73376	2.62913	2.70956	2.71572	2.70892	2.69166	2.82454	2.79127	2.79045	2.7865	3.11113	3.0846	3.07642	3.0926
1264	2.49506	2.50991	2.51455	2.54201	2.56578	2.54319	2.53878	2.49949	2.54036	2.55265	2.5179	2.53856	2.52592	2.49145	2.4914	2.48267	2.52679	2.52708	2.56552	2.49962	2.61121	2.60533	2.71285	2.59673	2.6926	2.69853	2.69327	2.67038	2.81114	2.7745	2.77032	2.75192	3.06526	3.03694	3.02704	3.03774
1266	2.49511	2.51139	2.51263	2.53331	2.55352	2.53863	2.53224	2.49682	2.54024	2.54303	2.52162	2.52965	2.52974	2.49019	2.49143	2.48718	2.52328	2.52224	2.56417	2.50158	2.59248	2.59207	2.70308	2.58009	2.68036	2.68319	2.68105	2.65336	2.79783	2.77612	2.75519	2.73728	3.03319	3.0008	2.99675	3.0023
1268	2.49823	2.52005	2.52401	2.53639	2.54879	2.54028	2.53696	2.50467	2.54427	2.5492	2.53018	2.53247	2.5339	2.50682	2.50298	2.49005	2.51884	2.52476	2.56722	2.51364	2.58319	2.57123	2.69767	2.57629	2.66684	2.6703	2.65869	2.63744	2.78116	2.77634	2.74524	2.72666	3.00016	2.96357	2.96754	2.97696
1270	2.5071	2.52784	2.53658	2.55397	2.55444	2.55102	2.5451	2.50929	2.55005	2.56019	2.5374	2.54029	2.54144	2.51932	2.51516	2.49964	2.5203	2.52926	2.56607	2.52162	2.57685	2.56621	2.6931	2.57611	2.65706	2.66051	2.63916	2.62505	2.7673	2.76332	2.73457	2.72299	2.97459	2.94452	2.94957	2.95673
1272	2.52622	2.54507	2.54678	2.56131	2.55804	2.55633	2.54657	2.51477	2.55544	2.56706	2.55099	2.54901	2.55019	2.53131	2.52981	2.51036	2.54153	2.54294	2.56086	2.52885	2.59513	2.5866	2.69202	2.59206	2.65722	2.66295	2.65376	2.6269	2.75272	2.74611	2.72303	2.72531	2.95497	2.93033	2.92658	2.94064
1274	2.53539	2.55548	2.54711	2.558	2.56056	2.5563	2.54635	2.52206	2.57034	2.5778	2.55872	2.56381	2.56248	2.53958	2.54191	2.50597	2.55683	2.55546	2.56331	2.53205	2.62526	2.60329	2.69269	2.61326	2.66277	2.66736	2.67964	2.63317	2.74302	2.73528	2.71832	2.72638	2.94115	2.91934	2.90584	2.92037
1276	2.54184	2.559	2.54956	2.55596	2.56253	2.55916	2.5508	2.53588	2.58021	2.58755	2.56012	2.56965	2.57094	2.5419	2.54116	2.4972	2.54861	2.5589	2.57042	2.53579	2.62632	2.60619	2.69378	2.61815	2.66894	2.66413	2.67726	2.62823	2.74444	2.72152	2.7147	2.71831	2.92795	2.90326	2.88606	2.90512
1278	2.54701	2.56034	2.55686	2.56133	2.56558	2.56413	2.56425	2.55042	2.57999	2.59586	2.56225	2.57324	2.57917	2.54761	2.53214	2.5012	2.54107	2.5608	2.57477	2.54161	2.61292	2.60643	2.69513	2.61892	2.67169	2.65908	2.65859	2.61664	2.74908	2.71547	2.71412	2.70935	2.91193	2.88734	2.86646	2.88158
1280	2.55431	2.56621	2.56284	2.56963	2.57237	2.56803	2.57218	2.55754	2.57915	2.59617	2.56759	2.57699	2.57959	2.55471	2.52973	2.51275	2.54852	2.56682	2.58045	2.54703	2.61229	2.60723	2.69928	2.62021	2.66989	2.6587	2.65554	2.61816	2.74876	2.71044	2.71723	2.70677	2.89775	2.8719	2.85767	2.86825
1282	2.563	2.57426	2.5708	2.58469	2.58031	2.57956	2.5855	2.56632	2.58706	2.59853	2.57352	2.58352	2.58496	2.56343	2.53877	2.52491	2.5593	2.57981	2.58932	2.55496	2.63242	2.60954	2.71118	2.62067	2.66643	2.65905	2.66642	2.63428	2.74399	2.70983	2.71825	2.70643	2.87804	2.85232	2.84832	2.85282
1284	2.57407	2.58407	2.58053	2.60372	2.59513	2.59899	2.59905	2.5772	2.60534	2.60665	2.58434	2.59238	2.59783	2.57848	2.55453	2.54407	2.56924	2.58996	2.59623	2.56568	2.64309	2.61687	2.72303	2.62611	2.67	2.66147	2.67475	2.64611	2.74253	2.7189	2.7156	2.70963	2.86866	2.84377	2.84012	2.84411
1286	2.59065	2.59996	2.59656	2.61616	2.60908	2.61233	2.61137	2.59749	2.62394	2.62279	2.6034	2.61126	2.61927	2.60514	2.57695	2.55795	2.58824	2.60103	2.61187	2.58302	2.63563	2.63327	2.74646	2.64482	2.68796	2.67346	2.68161	2.65263	2.74802	2.72399	2.71687	2.71527	2.86269	2.83415	2.82862	2.83511
1288	2.60738	2.6127	2.61231	2.63308	2.63327	2.62881	2.62621	2.61129	2.63899	2.64059	2.61542	2.6317	2.63791	2.62433	2.59648	2.57235	2.60298	2.61522	2.63741	2.5952	2.63072	2.64283	2.76301	2.65912	2.70455	2.68444	2.68687	2.65617	2.75933	2.71784	2.72725	2.7217	2.85757	2.82869	2.82218	2.82707
1290	2.62936	2.63429	2.63236	2.64404	2.65511	2.64432	2.64457	2.63214	2.65305	2.66173	2.63463	2.64685	2.6476	2.64719	2.62334	2.589	2.62572	2.64774	2.66427	2.61202	2.65195	2.65232	2.78192	2.67492	2.72048	2.69859	2.69574	2.66494	2.76515	2.71447	2.73692	2.73418	2.84805	2.8214	2.81355	2.81844
1292	2.64542	2.6533	2.6509	2.66018	2.67465	2.67339	2.67397	2.65104	2.68012	2.68434	2.65177	2.66707	2.66126	2.66855	2.64104	2.60801	2.64944	2.6743	2.6829	2.62601	2.68256	2.66427	2.7965	2.69516	2.73558	2.72012	2.70983	2.68039	2.76645	2.73031	2.74735	2.74408	2.84296	2.8222	2.81177	2.81222
1294	2.67042	2.6812	2.67523	2.67647	2.69345	2.69874	2.69237	2.67423	2.70548	2.70074	2.68013	2.68602	2.68304	2.68381	2.66127	2.63237	2.6812	2.69882	2.69507	2.64337	2.7091	2.69478	2.81433	2.71718	2.74856	2.73795	2.73179	2.70014	2.77772	2.75472	2.75971	2.75872	2.85107	2.84	2.82704	2.81923
1296	2.69191	2.70428	2.70478	2.70353	2.71678	2.72543	2.71327	2.69646	2.73031	2.7219	2.70327	2.71567	2.71792	2.69604	2.68687	2.65599	2.71042	2.72776	2.71821	2.66421	2.74398	2.72513	2.83561	2.74324	2.76754	2.75892	2.76449	2.72799	2.79977	2.77264	2.77833	2.77331	2.86221	2.85301	2.84185	2.83396
1298	2.72541	2.73567	2.73429	2.73307	2.74783	2.75373	2.73411	2.72434	2.75813	2.74771	2.73051	2.74197	2.7438	2.71921	2.71976	2.68185	2.74565	2.75247	2.75306	2.70659	2.7653	2.75316	2.85719	2.7637	2.78679	2.77595	2.78513	2.74654	2.82975	2.79876	2.80848	2.79815	2.8721	2.85156	2.84904	2.84731
1300	2.7608	2.76871	2.76375	2.77488	2.78087	2.78434	2.76795	2.76243	2.80071	2.78772	2.76164	2.77921	2.78601	2.75433	2.75277	2.70451	2.78454	2.7827	2.79037	2.7549	2.78658	2.78189	2.88692	2.79432	2.81396	2.80472	2.80994	2.77598	2.85353	2.82137	2.8283	2.82058	2.88524	2.85003	2.85774	2.86839
1302	2.79798	2.80002	2.79502	2.82107	2.82314	2.82112	2.8031	2.80092	2.84196	2.82331	2.80093	2.81671	2.82615	2.78917	2.77864	2.74048	2.8171	2.805	2.82215	2.78229	2.81285	2.80346	2.9114	2.82197	2.84151	2.83094	2.83625	2.80482	2.87491	2.85662	2.85371	2.8385	2.89272	2.86402	2.86767	2.8786
1304	2.83801	2.8374	2.83628	2.86059	2.86474	2.85776	2.85249	2.84737	2.87255	2.87053	2.84709	2.86251	2.86803	2.83558	2.81533	2.77833	2.85387	2.82981	2.85809	2.80963	2.86773	2.83332	2.94824	2.86303	2.87848	2.8698	2.87852	2.84241	2.89771	2.88372	2.87509	2.86259	2.90457	2.89136	2.88457	2.89037
1306	2.87792	2.87583	2.88004	2.90629	2.92035	2.90583	2.90605	2.88659	2.91054	2.9166	2.88627	2.90931	2.90921	2.88065	2.85863	2.82242	2.88943	2.86193	2.90435	2.84086	2.91792	2.86773	2.98508	2.90238	2.91524	2.906	2.91498	2.88224	2.92441	2.91407	2.90127	2.89141	2.91638	2.91151	2.89875	2.90368
1308	2.9276	2.92523	2.93251	2.955	2.97514	2.95388	2.9509	2.93378	2.96464	2.96535	2.93559	2.95724	2.95881	2.93651	2.91027	2.86994	2.93623	2.92438	2.96127	2.88979	2.96791	2.92428	3.04139	2.95221	2.95302	2.95146	2.95279	2.94039	2.95986	2.94696	2.9348	2.93275	2.93653	2.93744	2.92126	2.93269
1310	2.97992	2.97848	2.98899	3.01592	3.0323	3.01172	2.99995	2.98635	3.03168	3.01466	2.99141	3.01392	3.01137	2.98788	2.95784	2.93892	2.99514	2.98819	3.02019	2.93598	3.02268	2.98347	3.09839	3.00723	2.9987	3.00592	2.99264	2.99866	3.01189	3.0006	2.99419	2.97018	2.9601	2.95875	2.94327	2.96378
1312	3.04549	3.0537	3.0598	3.07005	3.091	3.06933	3.06458	3.05728	3.10258	3.07699	3.0666	3.07533	3.06692	3.04563	3.01566	3.01688	3.07342	3.05302	3.07458	2.99233	3.08862	3.05788	3.1621	3.07116	3.06889	3.06156	3.04487	3.05415	3.07624	3.06406	3.05614	3.02274	3.00627	2.99275	2.98613	2.99907
1314	3.11815	3.13316	3.13682	3.13795	3.15863	3.14085	3.14695	3.12578	3.18352	3.15929	3.14054	3.1485	3.13126	3.11124	3.08206	3.08848	3.14208	3.11929	3.13099	3.05095	3.16647	3.13574	3.22976	3.1441	3.14974	3.12833	3.11074	3.11748	3.13973	3.12718	3.11172	3.0769	3.05747	3.02833	3.02602	3.04003
1316	3.21012	3.22416	3.21869	3.21381	3.23778	3.22082	3.22142	3.19309	3.26064	3.24646	3.2204	3.22546	3.2037	3.19012	3.17002	3.16524	3.22053	3.1925	3.19865	3.12148	3.24035	3.22309	3.30827	3.22296	3.21998	3.19594	3.17612	3.18055	3.20591	3.19987	3.17352	3.14431	3.10701	3.07748	3.06702	3.0859
1318	3.30388	3.31813	3.30698	3.31182	3.33369	3.31481	3.30341	3.27736	3.33884	3.34109	3.3105	3.32151	3.29698	3.28367	3.26723	3.24848	3.30972	3.28019	3.28983	3.20463	3.32294	3.31903	3.39509	3.31426	3.29472	3.27454	3.25519	3.25596	3.27824	3.27442	3.24422	3.21907	3.1614	3.13493	3.11511	3.14812
1320	3.40703	3.41956	3.41152	3.42855	3.45097	3.42614	3.4048	3.39076	3.43684	3.44517	3.42545	3.42934	3.40811	3.39804	3.3742	3.34424	3.40747	3.38045	3.39969	3.31289	3.4163	3.42039	3.48019	3.41073	3.38712	3.37036	3.34912	3.34425	3.36563	3.36937	3.33615	3.30893	3.22538	3.20589	3.18203	3.2136
1322	3.53471	3.54121	3.5464	3.5673	3.58591	3.56263	3.54299	3.53084	3.57963	3.57709	3.56433	3.55919	3.54951	3.53849	3.50119	3.46272	3.52457	3.50258	3.53308	3.44649	3.53939	3.53777	3.58254	3.52363	3.51362	3.49732	3.47106	3.45735	3.47637	3.4855	3.4513	3.41894	3.30854	3.29425	3.27363	3.30059
1324	3.70718	3.70355	3.71796	3.7341	3.74863	3.73401	3.71407	3.69658	3.76332	3.74327	3.73398	3.71672	3.71663	3.69593	3.65387	3.62084	3.68795	3.6554	3.69554	3.60086	3.69219	3.68743	3.73299	3.67322	3.66493	3.64819	3.61655	3.59747	3.62651	3.64525	3.6047	3.56305	3.41635	3.40482	3.38435	3.40845
1326	3.91483	3.90719	3.93172	3.94411	3.95735	3.94649	3.9318	3.90469	3.97749	3.96307	3.94105	3.92884	3.92397	3.88093	3.84312	3.81167	3.90623	3.85088	3.8888	3.78816	3.89139	3.87647	3.9484	3.88705	3.85101	3.84056	3.8017	3.79263	3.81025	3.82732	3.78056	3.74091	3.56304	3.54645	3.52822	3.55668
1328	4.16078	4.16053	4.17594	4.20726	4.23113	4.21592	4.18432	4.15245	4.22182	4.22147	4.18802	4.1826	4.16417	4.10767	4.07487	4.05135	4.14971	4.08177	4.11299	4.00815	4.12534	4.09409	4.18001	4.13378	4.0699	4.06308	4.01847	4.01742	4.01694	4.0454	3.99459	3.9447	3.72852	3.70622	3.68893	3.72282
1330	4.46079	4.47463	4.46112	4.51515	4.54339	4.51973	4.46908	4.44935	4.51434	4.52883	4.4872	4.47468	4.44912	4.39207	4.35723	4.32932	4.43272	4.36969	4.3865	4.27599	4.40527	4.3602	4.44753	4.41765	4.33906	4.31436	4.28522	4.27182	4.25319	4.29032	4.23755	4.18662	3.9244	3.89513	3.88104	3.91816
1332	4.81457	4.82553	4.80244	4.87678	4.90597	4.86588	4.80284	4.78681	4.86699	4.88122	4.83184	4.81093	4.78438	4.7257	4.68422	4.6601	4.76753	4.70378	4.72607	4.59226	4.72257	4.68835	4.76568	4.74036	4.65553	4.60762	4.5934	4.56113	4.53893	4.5835	4.51993	4.46395	4.14314	4.1153	4.09914	4.13268
1334	5.22396	5.22364	5.21515	5.27056	5.30489	5.25487	5.21386	5.18236	5.27178	5.28724	5.23409	5.21574	5.19244	5.13387	5.08747	5.02476	5.16771	5.10907	5.11897	4.98115	5.09191	5.11371	5.17028	5.13098	5.03851	4.98834	4.9654	4.91015	4.85939	4.88298	4.81059	4.78443	4.39519	4.38493	4.36338	4.3779
1336	5.64677	5.64406	5.63515	5.71038	5.76232	5.71178	5.66468	5.60508	5.71422	5.70386	5.63636	5.6566	5.62832	5.55349	5.51352	5.42217	5.58819	5.5279	5.53287	5.37766	5.48921	5.52872	5.5788	5.53344	5.44143	5.40242	5.3536	5.28001	5.19658	5.19503	5.13076	5.11179	4.64072	4.6295	4.61026	4.61542
1338	6.09127	6.10974	6.05734	6.09581	6.17934	6.1292	6.08396	6.07308	6.12722	6.10269	6.06317	6.06646	6.05953	5.99347	5.94706	5.78228	6.05423	5.97147	5.93773	5.80809	5.93897	5.95954	6.02608	5.94464	5.8383	5.78749	5.75081	5.66878	5.51037	5.4441	5.40342	5.46954	4.89832	4.87196	4.86758	4.84569
1340	6.35858	6.37966	6.35165	6.46771	6.53257	6.51192	6.4611	6.38428	6.47947	6.43028	6.29529	6.43007	6.42806	6.29551	6.25847	6.04253	6.36751	6.29489	6.29386	6.09145	6.33202	6.23741	6.33072	6.26306	6.14484	6.10435	6.07295	5.99549	5.71332	5.5419	5.5591	5.65673	5.06167	4.99569	5.00806	5.01389
1342	6.51529	6.52559	6.46832	6.61069	6.73923	6.69669	6.55581	6.5102	6.63172	6.51694	6.41149	6.5182	6.53433	6.43305	6.40726	6.20891	6.51509	6.4273	6.45398	6.25638	6.42628	6.37961	6.43534	6.36327	6.22097	6.17201	6.13249	6.06095	5.81202	5.59939	5.65086	5.73611	5.0829	5.03289	5.02819	5.01694
1344	6.54794	6.57161	6.49187	6.53833	6.69176	6.63637	6.53054	6.54365	6.61851	6.51481	6.45257	6.51248	6.55952	6.48943	6.45072	6.19086	6.56235	6.48616	6.44747	6.33122	6.45603	6.44743	6.4897	6.40628	6.22819	6.17106	6.14325	6.07192	5.7943	5.56519	5.61436	5.75526	5.06963	5.04477	5.02532	4.97704
1346	6.35272	6.36723	6.34342	6.3977	6.51065	6.46819	6.43335	6.38034	6.4812	6.40925	6.27144	6.43613	6.48471	6.35027	6.29839	6.0108	6.41165	6.35258	6.29875	6.16517	6.38444	6.28772	6.36741	6.31851	6.13085	6.0908	6.0655	5.99866	5.63227	5.40935	5.45297	5.58968	4.97278	4.92932	4.92572	4.89306
1348	6.03999	6.02277	6.00256	6.08721	6.21419	6.16496	6.09047	6.0326	6.15211	6.06808	5.95199	6.08819	6.12576	6.01325	5.96119	5.7376	6.09843	5.9875	5.98511	5.82577	6.05107	5.94183	6.02108	5.99117	5.8052	5.77932	5.74529	5.69515	5.37759	5.21491	5.24168	5.31876	4.75578	4.70485	4.71501	4.69576
1350	5.63878	5.62769	5.5999	5.64982	5.77257	5.7367	5.67391	5.64175	5.72495	5.67546	5.57051	5.67341	5.69939	5.62051	5.56619	5.34555	5.70271	5.59633	5.60209	5.45059	5.66716	5.56843	5.64988	5.61565	5.43422	5.41819	5.39464	5.35029	5.06797	4.92937	4.94669	5.02908	4.52298	4.47381	4.48744	4.48233
1352	5.18977	5.18151	5.16882	5.2524	5.3399	5.31168	5.25743	5.19503	5.29976	5.24787	5.12988	5.25418	5.2505	5.15213	5.1235	4.96349	5.23371	5.15433	5.19102	5.01608	5.22395	5.12879	5.20774	5.16799	5.03326	5.0174	5.01097	4.95324	4.74904	4.64623	4.65439	4.69972	4.26216	4.21362	4.21528	4.24041
1354	4.78739	4.7883	4.78285	4.85622	4.90572	4.88062	4.84749	4.80658	4.88497	4.84015	4.75903	4.84436	4.8331	4.74879	4.72587	4.60337	4.81816	4.76464	4.78228	4.63834	4.80974	4.74096	4.81955	4.76045	4.65532	4.63751	4.64473	4.58351	4.4457	4.36871	4.36942	4.38457	4.02526	3.98428	3.98995	4.01766
1356	4.42039	4.42634	4.42985	4.49974	4.52649	4.51302	4.47845	4.46039	4.50412	4.49041	4.42279	4.47623	4.47109	4.39124	4.36626	4.28845	4.4439	4.41767	4.42073	4.28953	4.44478	4.38214	4.46454	4.39973	4.31768	4.30589	4.30023	4.26182	4.16664	4.11952	4.11983	4.08552	3.80746	3.77308	3.78978	3.81019
1358	4.13756	4.13609	4.13605	4.17649	4.19719	4.19427	4.15967	4.16784	4.18638	4.19274	4.14367	4.16077	4.15878	4.10201	4.07172	4.02538	4.14517	4.12501	4.12153	4.01044	4.13884	4.09573	4.17734	4.10545	4.03946	4.02808	4.01577	3.99367	3.9302	3.9012	3.90242	3.86478	3.63713	3.61656	3.62862	3.63591
1360	3.90442	3.89125	3.89713	3.93054	3.93892	3.94313	3.91433	3.9225	3.94782	3.9454	3.90184	3.92821	3.90423	3.86804	3.83449	3.80265	3.90127	3.87407	3.89011	3.77876	3.89985	3.85918	3.94594	3.87744	3.82645	3.82187	3.80773	3.78252	3.73661	3.71408	3.71394	3.68797	3.50561	3.49054	3.49187	3.50076
1362	3.7021	3.69348	3.6947	3.73543	3.74426	3.7443	3.71046	3.72116	3.75288	3.73515	3.70007	3.73785	3.70131	3.68136	3.64706	3.61614	3.70254	3.67339	3.70066	3.59926	3.70498	3.66894	3.76268	3.69273	3.65241	3.65466	3.63942	3.60964	3.57527	3.55629	3.54878	3.53492	3.39785	3.38196	3.38172	3.38866
1364	3.52013	3.52757	3.52115	3.56622	3.58304	3.58169	3.5428	3.54416	3.58186	3.5573	3.52047	3.56637	3.54781	3.52321	3.49235	3.45646	3.5386	3.51655	3.53899	3.45479	3.54952	3.50786	3.61012	3.54626	3.50945	3.50896	3.49815	3.47261	3.4363	3.42258	3.41059	3.39265	3.29628	3.27496	3.28048	3.28965
1366	3.38686	3.39272	3.38222	3.40897	3.44021	3.44041	3.40196	3.40065	3.43531	3.40688	3.38719	3.41277	3.41882	3.39054	3.36215	3.31423	3.40708	3.38644	3.405	3.33145	3.41828	3.38091	3.48358	3.42374	3.39274	3.38361	3.37681	3.35609	3.32994	3.31289	3.29624	3.28943	3.21527	3.20034	3.20456	3.20729
1368	3.28356	3.27277	3.2695	3.28753	3.32049	3.32237	3.29233	3.28815	3.32247	3.30206	3.28332	3.30344	3.31019	3.2783	3.25181	3.19514	3.29135	3.26858	3.29971	3.21526	3.3048	3.27474	3.37343	3.29896	3.2961	3.28419	3.27146	3.25166	3.24818	3.21854	3.20472	3.20871	3.1614	3.14681	3.14771	3.15369
1370	3.19526	3.18344	3.17964	3.19167	3.2171	3.2191	3.19882	3.19762	3.22889	3.22357	3.19976	3.21765	3.21592	3.18717	3.16441	3.10998	3.20152	3.17544	3.21256	3.12705	3.20535	3.19478	3.28291	3.18303	3.21184	3.19384	3.17756	3.15539	3.1806	3.15375	3.1493	3.14988	3.12348	3.1072	3.10474	3.11188
1372	3.10528	3.11391	3.10592	3.12015	3.1294	3.13557	3.12275	3.11982	3.15121	3.1597	3.12133	3.14717	3.14657	3.11063	3.09298	3.04356	3.13498	3.1163	3.13463	3.06678	3.1414	3.13438	3.21676	3.11918	3.15632	3.13358	3.12417	3.09934	3.12412	3.09986	3.10549	3.0923	3.09853	3.07071	3.07442	3.08449
1374	3.04471	3.06175	3.04742	3.06155	3.07892	3.07831	3.05027	3.05688	3.09125	3.09874	3.06072	3.07534	3.08484	3.04854	3.0353	3.00002	3.08448	3.07146	3.05773	3.01886	3.08804	3.08903	3.16019	3.07663	3.11102	3.07967	3.0806	3.05418	3.09173	3.07519	3.07841	3.05299	3.07564	3.04217	3.04831	3.0576
1376	3.01352	3.01835	3.01114	3.01595	3.03705	3.03733	3.00912	3.01719	3.05317	3.05447	3.0201	3.02821	3.03298	3.01188	2.99565	2.96169	3.0511	3.03586	3.0074	2.97132	3.05654	3.06922	3.13438	3.05518	3.08562	3.05396	3.05404	3.03209	3.07201	3.05603	3.05295	3.03931	3.06951	3.04354	3.03859	3.0491
1378	2.99313	2.98455	2.98274	2.99269	3.0134	3.0187	2.98959	2.98708	3.0248	3.01674	2.98937	2.99705	2.98346	2.98061	2.96388	2.93121	3.02234	2.99348	2.98428	2.92469	3.02811	3.05309	3.11423	3.03575	3.06631	3.04168	3.02935	3.0121	3.05872	3.04319	3.03766	3.02988	3.06783	3.05414	3.03146	3.05295
1380	2.9742	2.9796	2.96801	2.97239	2.99638	3.00271	2.97884	2.97324	2.99726	2.99515	2.97629	2.97796	2.96139	2.96153	2.94169	2.89842	2.99618	2.96567	2.97234	2.90532	3.00759	3.03297	3.09977	3.0154	3.04892	3.03118	3.01237	2.99418	3.05423	3.0219	3.02162	3.02032	3.07255	3.06168	3.03694	3.0565
1382	2.95179	2.9789	2.95679	2.95319	2.98316	2.98867	2.96717	2.96024	2.97907	2.97822	2.96511	2.9628	2.95879	2.94457	2.91837	2.87115	2.96917	2.94259	2.95497	2.89047	2.98132	2.99425	3.07538	2.98411	3.01906	3.0015	2.99405	2.96281	3.05066	3.00946	3.01142	3.00712	3.08375	3.0724	3.05786	3.05877
1384	2.92685	2.95968	2.93937	2.92855	2.957	2.96641	2.94878	2.94235	2.96734	2.96124	2.94326	2.94995	2.95276	2.93134	2.90659	2.84245	2.95201	2.92944	2.94097	2.88452	2.96346	2.97016	3.06262	2.9676	2.99422	2.975	2.97906	2.944	3.0307	3.0047	2.99416	2.9962	3.08947	3.07652	3.06442	3.0648
1386	2.89557	2.92064	2.91261	2.91622	2.93556	2.94482	2.91638	2.90691	2.94926	2.93276	2.90445	2.92919	2.93004	2.91027	2.8879	2.82387	2.92907	2.90494	2.92981	2.87586	2.96068	2.9415	3.0445	2.96177	2.97498	2.96228	2.95962	2.94836	3.01431	3.00234	2.98237	2.9793	3.09601	3.08104	3.06443	3.08267
1388	2.87611	2.90161	2.89154	2.90029	2.91825	2.91974	2.88426	2.88494	2.92585	2.90732	2.88472	2.9032	2.91241	2.89396	2.86594	2.80822	2.91623	2.89024	2.91885	2.86373	2.95971	2.92781	3.03393	2.95492	2.96321	2.9542	2.94384	2.95179	3.01781	3.00232	2.97456	2.97573	3.10556	3.08868	3.06764	3.09496
1390	2.85554	2.88529	2.86771	2.88661	2.90975	2.90746	2.87404	2.86152	2.91504	2.8995	2.86872	2.88917	2.90476	2.87843	2.8353	2.79244	2.90998	2.88681	2.9161	2.83975	2.94556	2.9193	3.02938	2.94252	2.96384	2.95313	2.94222	2.94488	3.02244	3.00228	2.96937	2.98015	3.12634	3.1063	3.08772	3.10144
1392	2.84469	2.87536	2.85283	2.86467	2.90208	2.89464	2.86321	2.84485	2.90662	2.89543	2.86002	2.87398	2.89765	2.86995	2.82243	2.79288	2.90591	2.88326	2.91551	2.82772	2.93029	2.91669	3.02708	2.93269	2.96113	2.95367	2.94323	2.93798	3.02536	3.00351	2.98049	2.9845	3.14491	3.11859	3.10413	3.11126
1394	2.83262	2.85906	2.84589	2.85639	2.89447	2.88221	2.85716	2.83374	2.89735	2.88684	2.85115	2.86817	2.88849	2.856	2.82492	2.80402	2.90092	2.87318	2.90492	2.82549	2.93558	2.9207	3.01677	2.93134	2.96108	2.95604	2.94673	2.93068	3.03048	3.00631	2.99397	2.99006	3.16328	3.1351	3.12721	3.13487
1396	2.83265	2.85161	2.84408	2.86621	2.89122	2.8722	2.85342	2.83432	2.88988	2.88072	2.8476	2.86143	2.8736	2.84587	2.82865	2.80997	2.89608	2.86535	2.89362	2.82667	2.9464	2.92498	3.00839	2.93621	2.96942	2.96031	2.95527	2.92131	3.04214	3.01761	3.00544	2.99829	3.18321	3.15261	3.15106	3.16987
1398	2.84283	2.8565	2.85502	2.8747	2.88815	2.87096	2.85721	2.85098	2.89226	2.88594	2.85163	2.86363	2.87104	2.85612	2.83745	2.81663	2.89603	2.86836	2.89149	2.83949	2.94466	2.93481	3.0167	2.94107	2.98262	2.96571	2.96713	2.93076	3.07085	3.03879	3.02542	3.02442	3.21184	3.1926	3.18013	3.20263
1400	2.84828	2.86258	2.86853	2.88035	2.88992	2.88879	2.87276	2.86091	2.89981	2.88988	2.85699	2.8779	2.87617	2.87173	2.84258	2.82245	2.89679	2.87131	2.89124	2.85258	2.94098	2.94439	3.02807	2.94237	2.9989	2.97366	2.9858	2.95195	3.09817	3.05966	3.05445	3.04512	3.25005	3.23453	3.21372	3.24466
1402	2.85451	2.86788	2.87106	2.88255	2.89435	2.90551	2.88141	2.85592	2.9032	2.89289	2.86619	2.88581	2.88708	2.88762	2.8501	2.82953	2.90201	2.87745	2.89604	2.86451	2.94566	2.94562	3.02806	2.94235	3.01165	2.98844	3.00459	2.96539	3.11875	3.09729	3.08742	3.06267	3.2884	3.27003	3.25859	3.27928
1404	2.86047	2.87239	2.87116	2.88479	2.90429	2.9086	2.88849	2.85415	2.91098	2.9067	2.87609	2.89258	2.9127	2.90226	2.8639	2.8306	2.90837	2.88993	2.91475	2.87611	2.95978	2.94822	3.02719	2.94453	3.03118	3.03177	3.03734	2.97835	3.12812	3.11355	3.1016	3.07884	3.32942	3.30679	3.31142	3.32082
1406	2.86924	2.87976	2.87426	2.88856	2.92496	2.91163	2.89102	2.8659	2.92406	2.91731	2.88884	2.89849	2.92725	2.90413	2.87306	2.82457	2.91191	2.90286	2.92886	2.88361	2.96647	2.96221	3.04111	2.95202	3.04688	3.05619	3.04886	2.99227	3.14063	3.13113	3.1181	3.09885	3.36707	3.34891	3.34326	3.35734
1408	2.87892	2.88733	2.87727	2.89367	2.93379	2.92142	2.89106	2.88271	2.93226	2.92533	2.90113	2.90568	2.9336	2.90364	2.88216	2.81948	2.91594	2.91985	2.93315	2.88753	2.98097	2.98084	3.07049	2.96998	3.07644	3.07552	3.0495	3.02207	3.16145	3.14618	3.13592	3.1209	3.41302	3.39818	3.37662	3.40275
1410	2.88253	2.89439	2.87981	2.90437	2.93946	2.93525	2.89583	2.89234	2.93196	2.92736	2.89954	2.91303	2.9324	2.90517	2.88899	2.81418	2.92652	2.92885	2.94161	2.88276	2.99888	2.99996	3.09268	2.99517	3.09879	3.0893	3.05819	3.0489	3.18921	3.17147	3.16403	3.14162	3.45188	3.43351	3.41275	3.44014
1412	2.88558	2.90341	2.88948	2.91974	2.94859	2.94579	2.91441	2.9072	2.93158	2.93401	2.89727	2.92811	2.93083	2.90664	2.8927	2.81438	2.94289	2.94349	2.95537	2.87975	3.0381	3.02949	3.12145	3.04404	3.11166	3.10845	3.09181	3.08199	3.22101	3.197	3.19053	3.1706	3.50092	3.4759	3.46307	3.48483
1414	2.90179	2.91345	2.90526	2.94111	2.97426	2.96258	2.93433	2.92406	2.94735	2.94927	2.9122	2.94662	2.93775	2.91807	2.89275	2.8403	2.96427	2.95828	2.96948	2.89322	3.07172	3.05491	3.13657	3.07376	3.12893	3.13018	3.12415	3.10446	3.26299	3.24286	3.22824	3.20856	3.55279	3.51948	3.50942	3.5314
1416	2.93116	2.92989	2.93036	2.96212	2.99788	2.98246	2.96071	2.94369	2.97642	2.97867	2.94155	2.97192	2.96755	2.94848	2.90152	2.8719	3.00356	2.98342	2.98884	2.92527	3.10793	3.08996	3.15674	3.09028	3.16876	3.17016	3.16767	3.12995	3.30909	3.28017	3.26648	3.26049	3.61697	3.58041	3.57117	3.5927
1418	2.96198	2.95102	2.95515	2.99593	3.02975	3.02149	2.99037	2.96403	3.01308	3.0055	2.96269	2.99704	3.00086	2.97175	2.92519	2.8977	3.0233	3.00791	3.01104	2.94422	3.13248	3.10619	3.16973	3.10578	3.20289	3.2089	3.19853	3.15592	3.35796	3.31639	3.31575	3.30341	3.67533	3.63616	3.6305	3.65199
1420	2.99686	2.98424	2.98359	3.01721	3.05124	3.04391	3.00928	2.99705	3.04391	3.0249	2.98981	3.0218	3.0271	2.9932	2.96649	2.91553	3.02864	3.03707	3.03477	2.97166	3.14261	3.11916	3.19252	3.13244	3.23564	3.22975	3.21332	3.18512	3.40154	3.34796	3.35268	3.35149	3.74379	3.70674	3.70596	3.71803
1422	3.00671	3.0033	3.00443	3.04113	3.06085	3.05377	3.02689	3.01893	3.066	3.04406	3.00871	3.05067	3.04745	3.00958	2.99143	2.93965	3.03641	3.05134	3.05505	2.98386	3.15079	3.13074	3.21266	3.15178	3.26705	3.24561	3.22681	3.20924	3.43302	3.38272	3.38244	3.37912	3.80128	3.75671	3.75875	3.77754
1424	3.0145	3.02317	3.01744	3.05591	3.06663	3.06463	3.03768	3.03647	3.07375	3.06226	3.03414	3.06272	3.05595	3.02794	3.01	2.96428	3.059	3.05508	3.06767	2.98936	3.157	3.15348	3.23321	3.15676	3.29346	3.2648	3.24479	3.2248	3.46052	3.41932	3.41008	3.40796	3.85404	3.80536	3.80028	3.82309
1426	3.02939	3.04183	3.02745	3.07701	3.08414	3.0902	3.05394	3.04931	3.07901	3.08309	3.05102	3.07275	3.06615	3.04595	3.02989	2.99124	3.08507	3.0646	3.0813	3.00047	3.16685	3.17446	3.25178	3.16599	3.31987	3.2947	3.27235	3.24537	3.49205	3.45851	3.44608	3.43663	3.90394	3.84972	3.84126	3.87257
1428	3.0595	3.07274	3.04844	3.09709	3.11215	3.11338	3.07545	3.06514	3.09528	3.10532	3.07508	3.09057	3.08897	3.07257	3.0633	3.01923	3.12397	3.09596	3.11469	3.03346	3.2055	3.2088	3.28999	3.20951	3.34895	3.33874	3.31811	3.28614	3.53482	3.50834	3.48948	3.48219	3.96438	3.91956	3.89921	3.93314
1430	3.09302	3.10355	3.08622	3.13046	3.15834	3.14816	3.11435	3.08944	3.13859	3.13814	3.10249	3.12693	3.13076	3.11105	3.10343	3.04759	3.16279	3.14088	3.16453	3.07174	3.27632	3.24904	3.33808	3.27827	3.39268	3.40483	3.3839	3.35181	3.59095	3.56907	3.54671	3.53346	4.03392	3.99319	3.9658	4.00665
1432	3.14651	3.15104	3.14743	3.17569	3.22087	3.19939	3.16104	3.14046	3.19908	3.18895	3.1561	3.17399	3.1768	3.172	3.15219	3.08853	3.21269	3.20399	3.21198	3.12702	3.3463	3.31372	3.39689	3.33795	3.45302	3.45954	3.44178	3.41703	3.667	3.64754	3.62473	3.60391	4.11057	4.08094	4.05921	4.0862
1434	3.21158	3.20684	3.22222	3.24909	3.28528	3.27552	3.23574	3.21161	3.27746	3.27176	3.22377	3.25123	3.24804	3.24277	3.20685	3.15894	3.27478	3.2839	3.26584	3.19595	3.42814	3.38925	3.4703	3.40702	3.53797	3.5292	3.50945	3.4955	3.75577	3.72236	3.70521	3.68589	4.19847	4.17497	4.16138	4.1813
1436	3.29999	3.29853	3.31065	3.33665	3.36397	3.36193	3.3179	3.29869	3.36341	3.36327	3.32251	3.3381	3.3286	3.31565	3.28586	3.26902	3.36018	3.36737	3.33773	3.27939	3.50559	3.46624	3.55534	3.48814	3.62331	3.60507	3.58812	3.57368	3.85281	3.8114	3.7977	3.78894	4.29685	4.28142	4.25538	4.28036
1438	3.40261	3.40657	3.41502	3.44427	3.46456	3.45468	3.42814	3.40144	3.46872	3.47757	3.43346	3.44836	3.43514	3.40494	3.3931	3.37379	3.46344	3.46038	3.43158	3.37508	3.58914	3.55835	3.65834	3.59319	3.71835	3.70332	3.68886	3.66669	3.95188	3.91073	3.89651	3.89254	4.4075	4.39045	4.35472	4.39293
1440	3.52894	3.52928	3.53253	3.56349	3.59026	3.56409	3.54315	3.52437	3.59139	3.59243	3.55261	3.56075	3.55558	3.52389	3.52247	3.47568	3.58367	3.55782	3.54761	3.48462	3.6897	3.68661	3.77161	3.70877	3.83253	3.80893	3.80279	3.76927	4.05648	4.0346	4.0125	3.99813	4.52213	4.49309	4.46565	4.49238
1442	3.65105	3.64873	3.65098	3.683	3.716	3.68974	3.6734	3.65582	3.71641	3.71036	3.66884	3.68177	3.69866	3.66253	3.65276	3.56617	3.70584	3.66374	3.68117	3.59798	3.81891	3.8248	3.89552	3.84247	3.97453	3.93016	3.94261	3.88932	4.16418	4.12993	4.1198	4.10498	4.64611	4.59723	4.58274	4.60001
1444	3.7668	3.75557	3.76084	3.79672	3.84999	3.81837	3.79167	3.76744	3.83123	3.81262	3.77133	3.78929	3.82154	3.77468	3.75749	3.65025	3.81722	3.76959	3.80148	3.71061	3.92847	3.92218	4.00226	3.95179	4.09003	4.04232	4.05072	3.99778	4.27826	4.21912	4.22336	4.21124	4.75534	4.70913	4.69246	4.7007
1446	3.86606	3.85194	3.86678	3.89769	3.96054	3.93	3.89798	3.8692	3.9331	3.91253	3.86215	3.8938	3.92926	3.86777	3.85109	3.72907	3.91718	3.87569	3.89362	3.81789	4.03006	4.00486	4.10644	4.05452	4.1954	4.15429	4.13767	4.10778	4.3766	4.29526	4.29669	4.30719	4.86078	4.82187	4.80194	4.81395
1448	3.94396	3.9354	3.94948	3.98234	4.05069	4.02418	3.97488	3.94853	4.01006	3.98815	3.9437	3.97343	4.00187	3.94485	3.92189	3.81269	3.98976	3.95781	3.97071	3.89548	4.11535	4.08494	4.18305	4.1254	4.2717	4.2395	4.20497	4.18099	4.46441	4.37788	4.36518	4.38496	4.94334	4.90153	4.88672	4.90235
1450	3.99904	3.999	4.00525	4.02486	4.08912	4.06569	4.02852	4.01027	4.06708	4.04691	4.01012	4.03214	4.05349	4.01561	3.98153	3.86368	4.04936	4.03428	4.03723	3.95748	4.198	4.16102	4.25398	4.18907	4.32914	4.30716	4.27232	4.23706	4.5245	4.43979	4.4197	4.45011	5.01745	4.97504	4.96906	4.97486
1452	4.02288	4.01899	4.02349	4.05347	4.10602	4.08954	4.06139	4.02796	4.10633	4.07724	4.03161	4.06614	4.07887	4.03246	4.00912	3.89235	4.08291	4.06951	4.07109	3.96631	4.23656	4.18669	4.27862	4.21864	4.36286	4.35122	4.31156	4.27049	4.56265	4.49765	4.47376	4.49042	5.0766	5.0316	5.0241	5.03203
1454	4.03558	4.03002	4.03535	4.06185	4.11304	4.09738	4.07027	4.03285	4.11204	4.08566	4.04424	4.07316	4.07438	4.02512	4.02028	3.91654	4.10302	4.08493	4.07013	3.95936	4.2411	4.19595	4.28545	4.22527	4.38452	4.37451	4.33544	4.29677	4.59669	4.53557	4.51644	4.5269	5.14375	5.09208	5.07569	5.10004
1456	4.042	4.04336	4.04902	4.06479	4.11014	4.10144	4.07192	4.03896	4.09698	4.09283	4.05864	4.07546	4.0693	4.03166	4.02805	3.95359	4.1099	4.09175	4.06909	3.96613	4.24466	4.21361	4.29406	4.23144	4.39615	4.38697	4.35442	4.31748	4.63669	4.5722	4.56212	4.56253	5.20459	5.14524	5.12542	5.15869
1458	4.05297	4.065	4.06138	4.07601	4.11389	4.11534	4.07946	4.0572	4.10196	4.11644	4.08321	4.0914	4.09221	4.05326	4.04233	3.98349	4.1231	4.10476	4.09172	3.98812	4.2766	4.25334	4.30936	4.24932	4.42014	4.40627	4.39263	4.34776	4.67318	4.60509	4.60419	4.60503	5.27218	5.20728	5.19563	5.22192
1460	4.07571	4.0861	4.08211	4.1043	4.14703	4.14933	4.09547	4.08018	4.13824	4.14478	4.10631	4.11682	4.12741	4.07601	4.05817	4.00403	4.1398	4.12288	4.12447	4.00781	4.30695	4.28265	4.3286	4.27317	4.46141	4.43578	4.4309	4.3818	4.70576	4.65573	4.66389	4.64012	5.33193	5.26814	5.25871	5.28379
1462	4.11119	4.12004	4.12887	4.13656	4.18674	4.1867	4.12603	4.11637	4.17833	4.17663	4.14337	4.15212	4.16679	4.12157	4.09096	4.0275	4.17079	4.15927	4.15827	4.03937	4.33864	4.31517	4.37636	4.31922	4.52461	4.48962	4.47194	4.4282	4.74424	4.71128	4.7164	4.68428	5.3992	5.34767	5.33608	5.35611
1464	4.14429	4.1613	4.17846	4.19221	4.24092	4.24464	4.17761	4.15532	4.22756	4.21523	4.18336	4.2049	4.21852	4.16827	4.13682	4.06413	4.2082	4.20226	4.20103	4.075	4.38331	4.35492	4.42537	4.37742	4.5907	4.55883	4.52512	4.48624	4.80026	4.77041	4.75447	4.73713	5.46948	5.41986	5.4044	5.43215
1466	4.20271	4.23485	4.23923	4.25177	4.3003	4.30244	4.24113	4.2151	4.2824	4.27203	4.24482	4.26359	4.27842	4.22882	4.20057	4.11491	4.27785	4.26607	4.25142	4.13968	4.44374	4.42563	4.49678	4.44906	4.65717	4.6325	4.59356	4.55602	4.87958	4.84125	4.79757	4.8179	5.56182	5.50223	5.47852	5.51619
1468	4.27702	4.3061	4.30589	4.33684	4.37732	4.37627	4.32895	4.28869	4.35927	4.35003	4.31503	4.34442	4.35044	4.30072	4.26274	4.18907	4.35572	4.34376	4.33507	4.20995	4.5244	4.49878	4.58197	4.53568	4.73313	4.72006	4.67794	4.63604	4.97097	4.93893	4.88649	4.8933	5.65446	5.58473	5.55823	5.61162
1470	4.38209	4.38897	4.38133	4.42367	4.47278	4.46209	4.42475	4.39098	4.4506	4.44601	4.41622	4.42633	4.43689	4.3999	4.33542	4.28558	4.45594	4.43846	4.44457	4.30587	4.63496	4.5975	4.7001	4.64697	4.82582	4.80978	4.77169	4.72259	5.07441	5.04816	4.99672	4.98366	5.76167	5.68812	5.66691	5.70834
1472	4.49361	4.48261	4.47859	4.53079	4.58205	4.57378	4.53713	4.49568	4.56475	4.56276	4.5204	4.52757	4.5537	4.50851	4.425	4.39048	4.56316	4.53708	4.56151	4.40518	4.76465	4.7014	4.82216	4.76645	4.93565	4.91774	4.88109	4.8261	5.18501	5.14778	5.1046	5.08765	5.87653	5.79598	5.78051	5.81423
1474	4.62352	4.60997	4.61396	4.64815	4.70633	4.69344	4.65081	4.60774	4.69244	4.67862	4.64692	4.64055	4.67722	4.62431	4.55542	4.5038	4.68631	4.64232	4.66115	4.51852	4.87771	4.8267	4.92704	4.86684	5.03885	5.02261	4.99191	4.93607	5.30239	5.25347	5.21754	5.21998	5.99526	5.92723	5.9044	5.93596
1476	4.73984	4.7299	4.74517	4.78519	4.8388	4.8226	4.77885	4.72407	4.82355	4.80552	4.76175	4.77575	4.80541	4.74231	4.70464	4.60035	4.8044	4.75916	4.75431	4.63202	4.9956	4.9548	5.02953	4.96812	5.1456	5.13871	5.1128	5.06411	5.41085	5.36435	5.32802	5.34154	6.11889	6.05388	6.02723	6.07323
1478	4.84988	4.84786	4.85642	4.90839	4.97375	4.95255	4.89655	4.83374	4.94528	4.92427	4.86637	4.89889	4.91142	4.85738	4.83111	4.70492	4.92185	4.87855	4.86541	4.74828	5.10944	5.08017	5.14571	5.08879	5.26768	5.25636	5.22964	5.1851	5.52041	5.48903	5.44828	5.45276	6.24119	6.16838	6.14826	6.2017
1480	4.96362	4.96831	4.97176	5.02173	5.09825	5.07975	5.01432	4.94946	5.06539	5.04411	4.97784	5.01783	5.02293	4.97666	4.94723	4.84077	5.04752	5.00256	4.99613	4.86517	5.23583	5.20831	5.27347	5.23371	5.41518	5.39094	5.36	5.31169	5.65446	5.61659	5.58667	5.56957	6.37623	6.29111	6.27519	6.3418
1482	5.10007	5.10675	5.10848	5.14449	5.22687	5.20874	5.13356	5.09497	5.19913	5.17021	5.11612	5.13696	5.1511	5.11805	5.07455	4.99403	5.19335	5.13595	5.13297	4.99673	5.37794	5.34458	5.41302	5.38176	5.5657	5.51569	5.49465	5.44403	5.81794	5.76277	5.74426	5.71342	6.53827	6.44616	6.42162	6.49402
1484	5.2472	5.2503	5.25597	5.30303	5.36687	5.34156	5.26773	5.24998	5.3531	5.31954	5.26241	5.27356	5.30747	5.27393	5.214	5.132	5.34493	5.27937	5.27275	5.13011	5.53825	5.49031	5.56544	5.53308	5.71541	5.64316	5.65063	5.59818	5.99039	5.92469	5.90273	5.8701	6.71913	6.62182	6.59123	6.67017
1486	5.41405	5.40732	5.4075	5.46623	5.51348	5.48443	5.4155	5.40205	5.51014	5.46799	5.42682	5.42682	5.45696	5.41958	5.34591	5.27276	5.49606	5.43259	5.41565	5.25944	5.68967	5.65079	5.70556	5.67471	5.85938	5.78327	5.80344	5.75062	6.1758	6.11447	6.07287	6.051	6.90704	6.81691	6.78387	6.86282
1488	5.58205	5.57299	5.56876	5.61587	5.66446	5.64406	5.59549	5.56408	5.66246	5.62548	5.59942	5.60557	5.61043	5.56441	5.48586	5.4168	5.65579	5.59675	5.56422	5.39887	5.846	5.82321	5.85485	5.83133	6.01619	5.95287	5.96734	5.91335	6.36944	6.31305	6.25946	6.24528	7.12269	7.04064	7.00727	7.09268
1490	5.74468	5.741	5.74044	5.77926	5.83748	5.82643	5.78044	5.73458	5.82258	5.79682	5.76896	5.78316	5.77314	5.71104	5.65777	5.57546	5.82561	5.75611	5.7352	5.56613	6.01919	6.00087	6.03008	6.00116	6.20476	6.14526	6.15128	6.09273	6.57616	6.53704	6.48017	6.44196	7.36974	7.29697	7.25442	7.35055
1492	5.92441	5.9286	5.93263	5.9713	6.02488	6.0115	5.96888	5.91878	6.01154	6.00009	5.95474	5.97064	5.95546	5.8798	5.85562	5.76	6.01128	5.92855	5.93091	5.75876	6.22076	6.19891	6.23793	6.1927	6.43984	6.37509	6.37126	6.30029	6.81814	6.79202	6.73368	6.66988	7.66809	7.59587	7.54004	7.65436
1494	6.14889	6.15417	6.15713	6.19357	6.23392	6.21822	6.18685	6.13001	6.23599	6.23271	6.17672	6.18627	6.16644	6.09971	6.05661	5.98581	6.22377	6.14632	6.1424	5.96416	6.44492	6.42534	6.47747	6.41906	6.70095	6.62855	6.6053	6.53623	7.11909	7.09541	7.03558	6.9704	8.02231	7.94391	7.86742	8.00142
1496	6.41661	6.42352	6.42788	6.45731	6.49238	6.47777	6.45578	6.38549	6.50602	6.50003	6.44672	6.44709	6.42744	6.37998	6.29574	6.25005	6.48207	6.41954	6.3849	6.2033	6.70626	6.69413	6.76517	6.70227	6.99188	6.91883	6.86677	6.82978	7.47952	7.47608	7.4007	7.33497	8.45797	8.36373	8.26806	8.41565
1498	6.73547	6.74593	6.76042	6.78577	6.82955	6.80728	6.77783	6.70146	6.83748	6.82458	6.7871	6.76492	6.7554	6.70994	6.62084	6.57046	6.8039	6.73257	6.69154	6.49497	7.0418	7.02767	7.09713	7.04054	7.34595	7.27943	7.20995	7.19253	7.91162	7.96966	7.85781	7.74884	8.98861	8.88635	8.78895	8.94
1500	7.13505	7.14926	7.18359	7.20169	7.24758	7.22383	7.17611	7.10401	7.24668	7.25664	7.21613	7.17753	7.17224	7.1118	7.04217	6.96476	7.21162	7.11266	7.09366	6.86255	7.49575	7.45255	7.50124	7.46432	7.80775	7.75226	7.69186	7.65653	8.45754	8.55277	8.40968	8.25368	9.66219	9.54801	9.46628	9.63154
1502	7.66755	7.67813	7.72545	7.72734	7.78006	7.76769	7.68616	7.61541	7.76415	7.79556	7.7503	7.69579	7.69516	7.61608	7.55697	7.4752	7.73348	7.60968	7.60174	7.35954	8.04427	8.00109	8.03321	8.00731	8.40598	8.34074	8.28597	8.22625	9.15993	9.26391	9.10727	8.90982	10.5196	10.3922	10.3061	10.4855
1504	8.34971	8.35899	8.41637	8.40309	8.46078	8.45719	8.37078	8.27684	8.44401	8.4699	8.42525	8.36585	8.37688	8.27049	8.20715	8.14024	8.41093	8.27704	8.25257	8.02291	8.72758	8.716	8.75299	8.72486	9.19554	9.09219	9.04304	8.96094	10.0338	10.1545	9.97933	9.74347	11.6119	11.465	11.3698	11.5696
1506	9.22296	9.23443	9.28218	9.27308	9.35856	9.3414	9.23392	9.12228	9.32784	9.31792	9.29626	9.21142	9.22592	9.11355	9.03091	9.00652	9.27892	9.11696	9.09748	8.84756	9.60059	9.62316	9.6585	9.6233	10.1752	10.0318	9.98058	9.88013	11.1264	11.3169	11.0778	10.8218	12.917	12.7854	12.684	12.8498
1508	10.302	10.327	10.3707	10.3673	10.467	10.4408	10.3386	10.2032	10.4322	10.4397	10.3734	10.323	10.3267	10.1995	10.086	10.0262	10.3783	10.194	10.1963	9.88048	10.7791	10.7768	10.8239	10.793	11.4278	11.2799	11.1879	11.0773	12.4079	12.5788	12.2935	12.131	14.4885	14.3686	14.2852	14.4158
1510	11.6255	11.6522	11.6701	11.685	11.8501	11.7914	11.6061	11.4928	11.7372	11.7363	11.6498	11.6017	11.6155	11.478	11.3551	11.2472	11.7222	11.4733	11.5041	11.1201	12.134	12.1414	12.1757	12.1491	12.8577	12.6992	12.5567	12.4305	13.8766	13.9769	13.6686	13.5815	16.1604	16.0389	15.9285	15.9948
1512	13.0591	13.1042	13.1068	13.1341	13.3201	13.2575	13.0442	12.9792	13.2184	13.2261	13.0449	13.06	13.1245	12.9493	12.8132	12.5499	13.2384	12.9911	12.937	12.5423	13.7359	13.7124	13.7629	13.7553	14.4529	14.3217	14.1888	14.0316	15.3408	15.2008	14.9866	15.0781	17.9102	17.7314	17.6073	17.6064
1514	14.5385	14.5045	14.4011	14.555	14.917	14.7818	14.3607	14.3766	14.6827	14.5172	14.364	14.3743	14.4769	14.3186	14.2219	13.9445	14.698	14.3582	14.353	13.9097	15.1704	15.1783	15.1626	15.1501	15.8629	15.702	15.5678	15.3621	16.6907	16.3599	16.2863	16.4232	19.2397	19.0068	18.9052	18.8096
1516	15.5963	15.5948	15.3563	15.2685	15.6863	15.546	15.3344	15.547	15.5729	15.4719	15.4201	15.3739	15.5844	15.51	15.3739	14.5713	15.8788	15.5525	15.3648	15.1187	16.4697	16.5039	16.454	16.3747	17.0256	16.7871	16.7279	16.4323	17.461	16.7654	16.8123	17.4288	20.2283	19.9845	19.9579	19.7164
1518	15.5348	15.5418	15.4618	15.6806	15.9209	15.8758	15.8291	15.6935	15.8607	15.8241	15.3661	15.8716	16.0526	15.6733	15.5486	14.6214	15.9824	15.7855	15.6941	15.1873	16.9906	16.6121	16.6758	16.7497	17.4435	17.2509	17.1744	16.8486	17.5882	16.7568	16.8945	17.4379	20.4409	20.0695	20.1058	20.0136
1520	15.1231	15.0385	14.9146	15.395	15.8071	15.6836	15.3488	15.1922	15.4954	15.2796	14.8481	15.3474	15.5065	15.1603	15.1122	14.4501	15.5315	15.2483	15.341	14.7631	16.459	16.144	16.1498	16.1963	17.0027	16.7804	16.6994	16.4162	17.4043	16.6664	16.8118	17.1706	20.1905	19.8738	19.8818	19.7741
1522	14.1571	14.1058	13.9332	14.0777	14.548	14.4415	14.2139	14.2445	14.3411	14.2044	13.9516	14.221	14.4153	14.2537	14.1944	13.4631	14.5992	14.3277	14.2571	13.9589	15.5186	15.3337	15.3314	15.267	16.0969	15.8927	15.8915	15.6476	16.7027	16.0357	16.1461	16.576	19.7802	19.5144	19.5047	19.388
1524	12.5578	12.5577	12.5124	12.7009	12.9671	12.9796	12.8466	12.6907	12.9099	12.8009	12.4602	12.8648	12.964	12.7363	12.6727	12.1306	12.998	12.8031	12.7964	12.3889	14.104	13.7946	13.8824	13.8483	14.762	14.6735	14.678	14.4526	15.6821	15.2179	15.2794	15.465	19.1095	18.7764	18.749	18.7595
1526	11.1553	11.1641	11.1258	11.2096	11.424	11.4351	11.3181	11.2173	11.4201	11.3177	11.1314	11.3584	11.4063	11.2664	11.2003	10.8199	11.4953	11.3235	11.2962	10.9698	12.5751	12.3766	12.4679	12.3938	13.3742	13.3293	13.3448	13.1436	14.6981	14.3726	14.3725	14.4679	18.3985	18.0718	18.0176	18.0468
1528	9.85407	9.85486	9.8898	9.9633	10.0788	10.1073	10.0068	9.89194	10.0972	10.0492	9.89397	10.0497	10.0807	9.91681	9.84992	9.62504	10.1108	10.0144	9.99891	9.66698	11.2708	11.0744	11.18	11.1323	12.216	12.1734	12.167	12.0208	13.7881	13.5442	13.4985	13.516	17.6998	17.3796	17.3193	17.3674
1530	8.81577	8.82203	8.85655	8.91422	8.99565	9.00695	8.90446	8.83599	8.98495	8.99922	8.90415	8.93317	8.98452	8.85523	8.77646	8.61149	9.04106	8.97635	8.94855	8.66813	10.186	10.0477	10.1482	10.0982	11.2638	11.1874	11.1679	11.0569	12.9765	12.7727	12.7007	12.7042	17.0385	16.7431	16.6785	16.7306
1532	7.98314	7.99198	8.02752	8.13404	8.18447	8.1817	8.09278	7.98963	8.16591	8.19378	8.0944	8.12678	8.15119	8.02488	7.94669	7.84165	8.21101	8.16984	8.16844	7.88003	9.35284	9.21846	9.32514	9.28249	10.5116	10.4375	10.3907	10.2861	12.2744	12.1042	12.0181	11.9957	16.4093	16.1424	16.0819	16.1639
1534	7.44249	7.46814	7.47939	7.52821	7.58546	7.55966	7.49758	7.44338	7.60177	7.6187	7.55881	7.54547	7.56533	7.48354	7.40892	7.29213	7.66422	7.63155	7.62542	7.3803	8.75951	8.66496	8.76704	8.7101	9.94704	9.87187	9.8122	9.71118	11.7101	11.551	11.4505	11.4503	15.8487	15.5891	15.5397	15.6345
1536	7.07226	7.10852	7.11995	7.1993	7.24314	7.23104	7.16821	7.09698	7.27475	7.27307	7.17836	7.21383	7.23476	7.11587	7.0591	6.9664	7.30283	7.26262	7.28004	7.03216	8.39706	8.2646	8.37292	8.34053	9.55316	9.484	9.42556	9.33177	11.2618	11.1078	11.0112	11.0161	15.3443	15.0692	15.0351	15.1131
1538	6.93442	6.96639	6.95499	7.0003	7.08537	7.06094	6.97595	6.96018	7.09909	7.08245	7.03468	7.01762	7.05657	6.9786	6.92208	6.82572	7.16494	7.08748	7.07751	6.87985	8.17863	8.08688	8.17537	8.12716	9.28505	9.21158	9.16098	9.06539	10.9162	10.7854	10.6891	10.7014	14.8638	14.6076	14.5672	14.614
1540	6.86878	6.89386	6.90536	6.94572	7.02675	7.0034	6.93628	6.91065	7.04568	7.03026	6.96609	6.98024	7.01855	6.95602	6.89185	6.75477	7.10527	7.0311	7.0072	6.80673	8.08199	8.01008	8.09006	8.03347	9.11597	9.05743	8.99907	8.89794	10.6273	10.4851	10.3948	10.4537	14.4014	14.1903	14.1312	14.1566
1542	6.85541	6.87341	6.88948	6.9491	7.05531	7.02317	6.93263	6.89125	7.04791	7.01246	6.9266	6.97103	7.00615	6.94593	6.88845	6.71152	7.09265	7.01167	7.00856	6.7932	8.01539	7.9483	8.02406	7.96082	8.97465	8.93114	8.8585	8.75737	10.3429	10.1391	10.0827	10.1856	13.9154	13.7206	13.658	13.6894
1544	6.86202	6.87247	6.87028	6.93371	7.07698	7.03492	6.92391	6.87928	7.0327	6.98799	6.89344	6.94579	6.9913	6.9352	6.8807	6.66698	7.10766	7.01422	7.02965	6.81692	7.94493	7.87055	7.93804	7.87556	8.81467	8.76012	8.6862	8.60022	10.0342	9.77203	9.75116	9.8858	13.3609	13.1465	13.1079	13.1512
1546	6.81016	6.82437	6.81015	6.85937	7.00315	6.97569	6.88825	6.83239	6.96373	6.93851	6.82396	6.89053	6.96341	6.89284	6.83231	6.59276	7.07944	6.98814	6.99037	6.78937	7.84721	7.74961	7.81922	7.76213	8.61461	8.53091	8.47678	8.40916	9.67578	9.39228	9.38501	9.5411	12.7551	12.5391	12.5227	12.5532
1548	6.64895	6.65068	6.64185	6.73363	6.85313	6.84458	6.75705	6.67544	6.81869	6.79131	6.64435	6.75884	6.83752	6.73099	6.67849	6.47335	6.89447	6.81525	6.83854	6.60519	7.63808	7.5056	7.58913	7.55471	8.31425	8.21692	8.19946	8.11587	9.26147	8.98765	8.98851	9.11859	12.0972	11.8928	11.8961	11.8971
1550	6.41612	6.41128	6.38094	6.4392	6.57553	6.55603	6.46883	6.44227	6.5425	6.51671	6.40551	6.503	6.5641	6.48925	6.43844	6.25196	6.61737	6.55412	6.56574	6.36011	7.30679	7.191	7.28236	7.24085	7.89976	7.82	7.84438	7.73255	8.78121	8.53567	8.55129	8.65527	11.4136	11.2342	11.2409	11.2154
1552	6.05435	6.06075	6.03234	6.09159	6.2076	6.19508	6.13117	6.09781	6.19106	6.17494	6.06051	6.17906	6.23462	6.13831	6.09758	5.92572	6.25425	6.21352	6.21819	6.01881	6.89574	6.75893	6.87507	6.82831	7.4326	7.39037	7.3938	7.29409	8.25138	8.05694	8.08086	8.13998	10.7167	10.5476	10.5417	10.545
1554	5.66632	5.68135	5.64587	5.68895	5.8119	5.78987	5.72238	5.70464	5.79412	5.77269	5.69185	5.76621	5.83898	5.74518	5.70843	5.53586	5.86115	5.82394	5.81223	5.64718	6.41657	6.32565	6.43268	6.3688	6.94295	6.92159	6.88537	6.80865	7.7349	7.5692	7.57961	7.62659	10.0519	9.89688	9.87597	9.89372
1556	5.24212	5.25917	5.25723	5.29247	5.39905	5.38046	5.32171	5.28509	5.38259	5.36967	5.28734	5.35504	5.41869	5.33156	5.27092	5.13338	5.43235	5.40322	5.38804	5.24554	5.96125	5.92183	5.98368	5.91667	6.45898	6.45057	6.42318	6.33694	7.25311	7.09382	7.08747	7.11245	9.43094	9.2862	9.25697	9.29274
1558	4.8644	4.88133	4.88567	4.91077	4.99186	4.98567	4.92968	4.89905	4.98083	4.97769	4.91836	4.95224	4.99157	4.94257	4.87171	4.77178	5.03565	5.00224	4.98673	4.87218	5.52582	5.52119	5.55748	5.48079	5.99677	5.99606	5.9892	5.88362	6.79943	6.65124	6.63812	6.64979	8.8498	8.72044	8.69085	8.73149
1560	4.52721	4.54709	4.5358	4.57586	4.62339	4.63483	4.59148	4.55877	4.62491	4.63779	4.57978	4.61526	4.63113	4.58865	4.5449	4.44536	4.68558	4.65876	4.65535	4.5302	5.13931	5.10012	5.16222	5.10296	5.59367	5.60095	5.59415	5.48723	6.36322	6.24267	6.22783	6.22954	8.30744	8.18828	8.16673	8.21058
1562	4.24142	4.26779	4.2444	4.28312	4.32785	4.33436	4.29841	4.26789	4.32407	4.34139	4.29907	4.32177	4.32721	4.29545	4.26482	4.16633	4.38285	4.36964	4.3757	4.2488	4.80341	4.75119	4.82602	4.78297	5.25353	5.25529	5.23967	5.14212	5.96681	5.87805	5.85544	5.86199	7.82873	7.72148	7.70465	7.74205
1564	3.9915	4.0267	4.01751	4.04752	4.08405	4.08637	4.05773	4.01843	4.08824	4.09631	4.05859	4.0796	4.09887	4.05477	4.0178	3.94156	4.11637	4.12035	4.12935	4.01587	4.53962	4.47929	4.54859	4.52267	4.98175	4.96646	4.94918	4.85897	5.63653	5.56414	5.53846	5.53659	7.4128	7.29901	7.29284	7.33846
1566	3.80078	3.8346	3.83098	3.85296	3.88882	3.8836	3.85283	3.82249	3.89721	3.89024	3.86141	3.87224	3.91212	3.86139	3.81947	3.76821	3.91361	3.91519	3.9406	3.82894	4.3225	4.25877	4.33057	4.30496	4.75227	4.71493	4.70284	4.62206	5.37821	5.31108	5.28032	5.27722	7.06121	6.95716	6.95327	6.98889
1568	3.64872	3.6747	3.66752	3.69075	3.73195	3.71719	3.68949	3.66814	3.72936	3.72451	3.69112	3.70631	3.7462	3.70654	3.66564	3.62338	3.76618	3.76086	3.79387	3.67651	4.14776	4.06744	4.16534	4.11249	4.55355	4.50537	4.49955	4.43663	5.16023	5.09494	5.06458	5.06499	6.77479	6.68781	6.67619	6.69784
1570	3.52445	3.54454	3.53193	3.54633	3.58958	3.57189	3.55374	3.54238	3.57862	3.5876	3.5605	3.56952	3.60797	3.58273	3.55816	3.50289	3.64683	3.64065	3.65745	3.5578	3.99891	3.92634	4.0327	3.95237	4.38194	4.32944	4.33199	4.28336	4.97122	4.90491	4.88614	4.89314	6.53251	6.45313	6.43676	6.4501
1572	3.4101	3.43025	3.42418	3.44181	3.46709	3.46072	3.45239	3.4351	3.4622	3.48105	3.4529	3.45905	3.50837	3.478	3.46695	3.40169	3.53709	3.53201	3.53949	3.45869	3.87651	3.82676	3.91756	3.84479	4.24144	4.19682	4.20216	4.15512	4.81424	4.73737	4.73118	4.74145	6.3235	6.22946	6.2168	6.24565
1574	3.313	3.3263	3.32725	3.36073	3.37593	3.38157	3.36692	3.33905	3.37418	3.38808	3.35357	3.35754	3.41967	3.38513	3.3625	3.3014	3.43572	3.43228	3.44649	3.36389	3.76617	3.73405	3.81457	3.75298	4.12099	4.08845	4.08508	4.03829	4.67279	4.59296	4.58071	4.59699	6.1355	6.03474	6.02324	6.06154
1576	3.22261	3.218	3.22745	3.2838	3.2973	3.30287	3.28084	3.23823	3.29447	3.29297	3.24722	3.26917	3.32159	3.28869	3.23998	3.20513	3.34198	3.33143	3.35284	3.25911	3.66244	3.62013	3.70659	3.645	4.01073	3.97765	3.96902	3.92517	4.53416	4.46664	4.44794	4.44655	5.95138	5.85199	5.84221	5.88508
1578	3.1478	3.14367	3.14372	3.19113	3.21435	3.21145	3.18202	3.15084	3.21341	3.20007	3.16433	3.18852	3.21933	3.20472	3.15386	3.11918	3.26531	3.24723	3.25671	3.17726	3.56575	3.53043	3.61747	3.54601	3.90692	3.86749	3.85497	3.81686	4.41602	4.34979	4.34852	4.33527	5.79136	5.7004	5.69244	5.72053
1580	3.07145	3.08804	3.07554	3.11005	3.13669	3.12711	3.1046	3.07744	3.13045	3.12823	3.09146	3.11624	3.1427	3.12757	3.09303	3.04584	3.19815	3.18353	3.1775	3.10961	3.48968	3.46419	3.55486	3.4757	3.81392	3.78628	3.76742	3.72331	4.32789	4.24664	4.26238	4.2406	5.66142	5.57205	5.57007	5.58412
1582	3.00448	3.03321	3.01594	3.0305	3.06809	3.05219	3.03426	3.01348	3.05468	3.06812	3.03706	3.04427	3.07713	3.05461	3.03494	2.98047	3.13853	3.12518	3.11684	3.05075	3.41559	3.39899	3.49166	3.41166	3.72675	3.71313	3.6897	3.63994	4.24415	4.16424	4.16778	4.15398	5.54554	5.44939	5.45226	5.46176
1584	2.93572	2.95844	2.95708	2.96936	3.00007	2.98573	2.96522	2.94678	2.99537	3.00828	2.98396	2.98294	3.0172	2.97934	2.96964	2.92406	3.07724	3.04678	3.06191	2.98561	3.32834	3.31345	3.39319	3.33251	3.65429	3.63951	3.62199	3.574	4.15288	4.08536	4.07492	4.06357	5.42663	5.30944	5.3137	5.35095
1586	2.88267	2.90109	2.8983	2.9161	2.93847	2.92387	2.89419	2.89321	2.94057	2.94535	2.93326	2.92239	2.95356	2.92331	2.91383	2.87504	3.0161	2.97979	3.00131	2.93256	3.24062	3.2429	3.30817	3.25748	3.58627	3.55514	3.55573	3.51168	4.05599	3.99405	3.99031	3.99085	5.31311	5.20273	5.20328	5.24374
1588	2.83007	2.84562	2.8374	2.86923	2.8825	2.87402	2.85205	2.84068	2.88712	2.8859	2.86796	2.87015	2.90047	2.87575	2.85287	2.83135	2.95024	2.93816	2.94133	2.88121	3.18418	3.18396	3.24552	3.20269	3.52328	3.48656	3.48085	3.45473	3.98167	3.91577	3.91971	3.9161	5.20375	5.11294	5.10775	5.14042
1590	2.79	2.80293	2.78784	2.81575	2.83419	2.83077	2.81798	2.7974	2.83822	2.82864	2.81831	2.81592	2.84956	2.83518	2.80331	2.79357	2.9012	2.90075	2.88873	2.83231	3.14022	3.13871	3.20194	3.15403	3.46362	3.4262	3.41041	3.39477	3.93455	3.87368	3.85563	3.86067	5.11252	5.04467	5.03296	5.04471
1592	2.75019	2.75593	2.747	2.76995	2.79591	2.79203	2.78232	2.75882	2.79488	2.78714	2.76869	2.78034	2.80429	2.78662	2.76303	2.75472	2.86123	2.85668	2.85182	2.77625	3.11213	3.09072	3.16573	3.10539	3.4148	3.38682	3.37174	3.34391	3.89185	3.83443	3.80006	3.80537	5.04516	4.98164	4.97059	4.97125
1594	2.70625	2.70554	2.70745	2.71825	2.75313	2.74567	2.73161	2.72076	2.7475	2.74757	2.72562	2.74408	2.75496	2.74324	2.72836	2.69656	2.825	2.8106	2.81375	2.73733	3.08275	3.04491	3.13136	3.05782	3.36795	3.34724	3.33619	3.29157	3.83394	3.77323	3.74989	3.75251	4.98742	4.92055	4.90656	4.90544
1596	2.64226	2.63602	2.65251	2.67207	2.70023	2.70067	2.67933	2.67165	2.69824	2.69872	2.66531	2.70502	2.71614	2.68936	2.68321	2.64114	2.78045	2.76298	2.769	2.70519	3.02927	2.98488	3.0781	3.00535	3.31714	3.29029	3.28227	3.23986	3.76618	3.71047	3.70389	3.68155	4.90888	4.83145	4.81253	4.83004
1598	2.60352	2.59723	2.60345	2.61374	2.64137	2.64596	2.62355	2.62518	2.65095	2.65001	2.63133	2.65522	2.67836	2.6472	2.6419	2.61085	2.74416	2.7289	2.73204	2.67757	2.96508	2.94719	3.03419	2.96287	3.26015	3.22755	3.2259	3.18496	3.71454	3.66125	3.65097	3.63597	4.83731	4.76481	4.73969	4.74928
1600	2.57143	2.56924	2.57555	2.57952	2.60222	2.60728	2.59377	2.57763	2.62488	2.62333	2.60098	2.62134	2.64536	2.61817	2.60815	2.58413	2.70992	2.70668	2.71654	2.63071	2.92555	2.91951	2.9998	2.93618	3.2205	3.1914	3.1993	3.14768	3.67376	3.61708	3.60006	3.59226	4.77595	4.70889	4.68182	4.68383
1602	2.55054	2.55138	2.55691	2.55488	2.58537	2.58768	2.5702	2.55279	2.61042	2.60058	2.5796	2.58686	2.61237	2.58935	2.57962	2.54119	2.67517	2.68628	2.69612	2.60188	2.89349	2.88835	2.9659	2.91223	3.18271	3.16171	3.17555	3.11538	3.62984	3.56822	3.55232	3.56012	4.71757	4.66213	4.63574	4.62864
1604	2.52783	2.53089	2.52853	2.53608	2.57181	2.57006	2.54501	2.53924	2.58188	2.57739	2.55224	2.55648	2.58291	2.55182	2.54452	2.51477	2.62279	2.64679	2.65552	2.58176	2.86447	2.83298	2.91316	2.87666	3.13802	3.13108	3.13234	3.09336	3.58555	3.52718	3.51822	3.51649	4.65841	4.60649	4.57886	4.58254
1606	2.50896	2.51275	2.50162	2.50984	2.54655	2.53159	2.5162	2.52559	2.54682	2.55086	2.53511	2.52363	2.55461	2.53186	2.52763	2.50908	2.60545	2.61871	2.61384	2.57305	2.83706	2.81012	2.88161	2.84453	3.10307	3.09381	3.08713	3.07453	3.55958	3.50256	3.48829	3.48953	4.61901	4.56473	4.53446	4.5385
1608	2.48264	2.48364	2.47848	2.49382	2.51777	2.50277	2.5024	2.50127	2.53287	2.53258	2.51433	2.51054	2.54137	2.52155	2.52904	2.50012	2.61056	2.60578	2.60019	2.56195	2.82989	2.81488	2.87501	2.8289	3.08752	3.08075	3.0748	3.05695	3.54111	3.47862	3.46155	3.46322	4.58599	4.51628	4.48893	4.50222
1610	2.46153	2.46589	2.45745	2.47786	2.49458	2.49196	2.48941	2.48535	2.52536	2.51389	2.49222	2.50239	2.52984	2.50905	2.51625	2.4668	2.59933	2.58885	2.59367	2.54677	2.82177	2.80538	2.86682	2.81387	3.07241	3.06968	3.06407	3.03483	3.50046	3.42939	3.42325	3.43508	4.54247	4.47197	4.44834	4.46251
1612	2.43734	2.44494	2.43567	2.46439	2.48031	2.48718	2.47339	2.46279	2.50725	2.48954	2.45861	2.49344	2.51852	2.4851	2.47344	2.43784	2.56476	2.55848	2.57812	2.5174	2.78732	2.76023	2.83249	2.78231	3.05406	3.04312	3.04225	2.99585	3.45465	3.38635	3.38544	3.38413	4.46993	4.39711	4.39548	4.40836
1614	2.41697	2.43275	2.42401	2.44429	2.47293	2.47655	2.45343	2.4395	2.47834	2.46433	2.43945	2.47623	2.50554	2.46378	2.4474	2.42452	2.54557	2.53425	2.5578	2.4961	2.7465	2.73136	2.79976	2.74349	3.03479	3.00941	3.01812	2.95414	3.41599	3.36146	3.34759	3.34625	4.40592	4.33721	4.34595	4.35176
1616	2.39251	2.41709	2.41068	2.42653	2.46047	2.45688	2.42902	2.41266	2.45221	2.44454	2.41699	2.44836	2.48551	2.43609	2.432	2.40853	2.52794	2.51402	2.53449	2.47058	2.71805	2.70709	2.76455	2.7019	2.99746	2.98385	2.98692	2.93606	3.37195	3.33697	3.31336	3.30287	4.34416	4.27326	4.27821	4.28419
1618	2.3769	2.40377	2.39075	2.39669	2.42868	2.41838	2.39518	2.39468	2.42331	2.42606	2.39842	2.4105	2.45596	2.4152	2.41271	2.37927	2.49911	2.49632	2.49941	2.45599	2.69254	2.68541	2.74007	2.67209	2.95246	2.95621	2.95081	2.91772	3.31992	3.2889	3.27361	3.26985	4.28904	4.22625	4.22213	4.22526
1620	2.35749	2.38085	2.36365	2.37618	2.39873	2.392	2.36706	2.3648	2.3955	2.4055	2.36779	2.38117	2.42365	2.3957	2.38257	2.35891	2.45811	2.46598	2.47125	2.44314	2.66464	2.6517	2.718	2.64628	2.9194	2.92525	2.91129	2.87385	3.28996	3.24755	3.24338	3.2291	4.22429	4.16967	4.15765	4.17872
1622	2.34635	2.35853	2.34168	2.35204	2.37459	2.37115	2.34037	2.34658	2.36805	2.3832	2.35621	2.35718	2.39694	2.38307	2.36633	2.35318	2.44263	2.44466	2.45511	2.43241	2.6375	2.63454	2.70381	2.6279	2.89172	2.89483	2.87633	2.83508	3.27526	3.21368	3.20907	3.20623	4.174	4.13039	4.1142	4.1354
1624	2.33196	2.32997	2.32244	2.34116	2.35872	2.36206	2.33665	2.3398	2.35414	2.36914	2.34651	2.3508	2.38774	2.37172	2.35786	2.34366	2.43831	2.42506	2.43893	2.41551	2.61992	2.6214	2.69508	2.60929	2.8625	2.86733	2.84605	2.82219	3.25271	3.18487	3.18255	3.18522	4.13046	4.07953	4.06749	4.08413
1626	2.31035	2.3067	2.30775	2.3319	2.34951	2.34752	2.33898	2.33308	2.3463	2.3555	2.33319	2.34508	2.38079	2.35983	2.33712	2.30592	2.42541	2.40898	2.41721	2.39553	2.60635	2.60097	2.68116	2.59303	2.83647	2.83956	2.82063	2.80832	3.20361	3.15179	3.14602	3.14979	4.08253	4.02517	4.01584	4.03154
1628	2.2858	2.28102	2.28913	2.31908	2.34245	2.33395	2.32349	2.31225	2.3343	2.33415	2.31099	2.33192	2.34971	2.33131	2.30703	2.28203	2.39691	2.38479	2.39099	2.36616	2.57537	2.56138	2.64412	2.56635	2.81311	2.80422	2.80197	2.7748	3.15693	3.12298	3.11368	3.0965	4.00505	3.95253	3.9325	3.96069
1630	2.28451	2.27654	2.27652	2.29737	2.32955	2.3261	2.30673	2.29991	2.32469	2.3175	2.30293	2.31661	2.32199	2.32284	2.29909	2.28743	2.38752	2.37797	2.37226	2.35455	2.55133	2.53325	2.61608	2.54798	2.78651	2.77135	2.77857	2.74475	3.13002	3.08467	3.08274	3.06815	3.94404	3.89744	3.87671	3.89509
1632	2.28718	2.2791	2.27356	2.29111	2.31892	2.31999	2.30517	2.29511	2.32036	2.30758	2.2963	2.31033	2.3184	2.3252	2.302	2.29282	2.38298	2.38691	2.3778	2.34307	2.54317	2.50092	2.58335	2.54855	2.74947	2.74265	2.73157	2.72383	3.10489	3.05545	3.05879	3.04001	3.89088	3.83732	3.82741	3.83246
1634	2.28426	2.2795	2.27526	2.29012	2.29929	2.30117	2.30082	2.2885	2.31097	2.30148	2.29359	2.30437	2.31699	2.31719	2.30284	2.28797	2.3768	2.38837	2.38394	2.33265	2.53961	2.50652	2.5748	2.54983	2.72967	2.72116	2.70216	2.70888	3.0745	3.02058	3.02705	3.01409	3.84347	3.79306	3.78758	3.78337
1636	2.27897	2.28048	2.27824	2.28557	2.28877	2.29118	2.29407	2.27526	2.3108	2.30372	2.29343	2.29674	2.30733	2.299	2.29882	2.28355	2.37207	2.37981	2.37608	2.31746	2.52316	2.53661	2.58119	2.53137	2.7255	2.70625	2.7008	2.68664	3.04864	2.99853	3.00263	2.98504	3.78174	3.7436	3.742	3.73448
1638	2.27629	2.28279	2.28408	2.2793	2.29298	2.2932	2.29254	2.27112	2.32065	2.30698	2.29432	2.29256	2.29913	2.28875	2.29315	2.2711	2.37519	2.37325	2.36038	2.314	2.5073	2.53811	2.57897	2.51553	2.71645	2.69755	2.69822	2.67094	3.02237	2.97323	2.97097	2.96942	3.72935	3.69109	3.68936	3.68817
1640	2.27417	2.28709	2.2933	2.28588	2.29779	2.29841	2.30302	2.27505	2.31681	2.31376	2.295	2.30232	2.31034	2.28234	2.28567	2.26502	2.37942	2.3695	2.35008	2.3131	2.50097	2.5264	2.564	2.50406	2.69525	2.68117	2.67319	2.65776	2.99637	2.95239	2.94857	2.94963	3.66676	3.62446	3.61771	3.62453
1642	2.27325	2.28029	2.28808	2.29788	2.30209	2.30161	2.31085	2.27728	2.30753	2.3185	2.29345	2.31055	2.3195	2.28636	2.27625	2.26896	2.36902	2.36032	2.35187	2.30901	2.49584	2.50551	2.54661	2.49584	2.67256	2.65941	2.65354	2.64542	2.96674	2.91778	2.91992	2.9222	3.61041	3.56598	3.56454	3.57197
1644	2.2718	2.27231	2.27418	2.29814	2.3015	2.30421	2.30403	2.2785	2.29567	2.31475	2.29229	2.3007	2.29891	2.29915	2.26396	2.26842	2.35163	2.34058	2.34954	2.30271	2.47698	2.47129	2.5182	2.47814	2.64201	2.62552	2.63675	2.62473	2.93897	2.89113	2.89072	2.89088	3.55198	3.50394	3.51208	3.5159
1646	2.27083	2.27288	2.26571	2.29442	2.29826	2.31123	2.29681	2.28542	2.28812	2.3089	2.29175	2.29342	2.2879	2.30069	2.26397	2.26954	2.33819	2.34106	2.3426	2.31134	2.46451	2.45684	2.50821	2.46686	2.62598	2.60587	2.62081	2.60709	2.90902	2.86255	2.85148	2.86478	3.4993	3.45184	3.46059	3.46646
1648	2.27092	2.27388	2.25967	2.28548	2.29471	2.30712	2.29106	2.29375	2.29367	2.30567	2.29138	2.29565	2.30385	2.29921	2.27424	2.27472	2.33	2.35189	2.35064	2.32885	2.45284	2.44441	2.50318	2.4577	2.61512	2.59307	2.60279	2.576	2.8781	2.83434	2.82083	2.83901	3.43869	3.40044	3.40083	3.40371
1650	2.27422	2.27595	2.25995	2.27253	2.29035	2.29595	2.28736	2.2912	2.29841	2.30811	2.29545	2.29624	2.31606	2.31024	2.29204	2.27815	2.35567	2.36495	2.36149	2.33526	2.45347	2.45135	2.51408	2.46274	2.60462	2.58549	2.5898	2.56338	2.84836	2.79245	2.78936	2.81237	3.39134	3.35765	3.35025	3.35577
1652	2.27763	2.27882	2.27003	2.27829	2.29273	2.29616	2.28463	2.28532	2.30525	2.31513	2.30072	2.30202	2.32525	2.32926	2.31107	2.28156	2.38172	2.38918	2.37391	2.33732	2.47164	2.46148	2.53558	2.47889	2.59825	2.5923	2.57517	2.5721	2.83256	2.77459	2.78011	2.79077	3.33858	3.3145	3.2947	3.30403
1654	2.28848	2.29821	2.28854	2.29017	2.30399	2.30418	2.28691	2.29159	2.31794	2.32265	2.30763	2.31111	2.33228	2.33916	2.31687	2.28999	2.38125	2.39124	2.38285	2.34297	2.47269	2.44875	2.51928	2.47454	2.5936	2.59281	2.56381	2.57358	2.81971	2.76229	2.77546	2.77711	3.29965	3.27501	3.25591	3.25949
1656	2.2998	2.31648	2.30658	2.29342	2.31295	2.31703	2.30813	2.30399	2.32954	2.33961	2.31686	2.32662	2.33711	2.35049	2.3209	2.29857	2.38029	2.38791	2.38794	2.35326	2.45759	2.43392	2.48542	2.45813	2.58278	2.57528	2.54773	2.56059	2.79878	2.75677	2.76641	2.76175	3.26351	3.23047	3.21713	3.20587
1658	2.30885	2.32097	2.31929	2.29867	2.32149	2.33437	2.32198	2.31388	2.33921	2.34747	2.33085	2.3369	2.34519	2.34993	2.33616	2.31541	2.39573	2.40077	2.39611	2.37589	2.45811	2.4473	2.50065	2.4616	2.57859	2.56433	2.55079	2.55165	2.77477	2.7523	2.74929	2.73823	3.22161	3.18076	3.17024	3.16569
1660	2.3153	2.32597	2.32831	2.32424	2.33768	2.35325	2.33678	2.32652	2.34982	2.3545	2.34275	2.34982	2.36495	2.34677	2.35521	2.32241	2.41304	2.41583	2.41018	2.39542	2.47066	2.46391	2.52903	2.47483	2.57929	2.55961	2.56702	2.54491	2.75847	2.74339	2.7351	2.72171	3.17054	3.13313	3.12072	3.12283
1662	2.32672	2.34142	2.33722	2.35196	2.36624	2.37339	2.35322	2.33706	2.36863	2.36336	2.35777	2.36365	2.37772	2.35741	2.36031	2.31609	2.4128	2.41807	2.43101	2.38687	2.47813	2.46714	2.53598	2.47381	2.56945	2.55503	2.56406	2.54233	2.74367	2.72891	2.71734	2.70973	3.13206	3.09354	3.08493	3.08994
1664	2.33652	2.35046	2.35504	2.37986	2.39765	2.39715	2.37842	2.34567	2.39275	2.38304	2.36752	2.38388	2.38935	2.37568	2.35892	2.3173	2.41359	2.41814	2.44724	2.38268	2.48642	2.47012	2.53961	2.47095	2.55159	2.54397	2.55154	2.5352	2.73404	2.70803	2.69777	2.69933	3.0901	3.05855	3.0497	3.05309
1666	2.35396	2.34985	2.36335	2.40087	2.42964	2.42403	2.38842	2.35425	2.39932	2.39526	2.37454	2.39535	2.39623	2.39526	2.36154	2.33342	2.42561	2.42776	2.45327	2.4022	2.48523	2.47229	2.53847	2.47957	2.55252	2.5409	2.55028	2.53086	2.72078	2.68127	2.67788	2.68474	3.04871	3.01862	3.00808	3.02746
1668	2.36723	2.36062	2.37282	2.40916	2.43918	2.42797	2.38628	2.3675	2.40076	2.41149	2.38383	2.40493	2.41184	2.41156	2.3751	2.35748	2.44217	2.44403	2.45623	2.42151	2.47728	2.47908	2.53849	2.49305	2.56093	2.54556	2.55137	2.52835	2.71647	2.68144	2.67558	2.67907	3.01168	2.98715	2.97585	2.99986
1670	2.39408	2.40876	2.40239	2.41757	2.44174	2.42753	2.39896	2.4041	2.42584	2.43224	2.41003	2.41997	2.43334	2.43977	2.4002	2.37471	2.47655	2.47872	2.47672	2.45049	2.49803	2.51603	2.56372	2.51522	2.57784	2.56704	2.57079	2.55182	2.72387	2.68584	2.67802	2.68513	2.98837	2.96078	2.95395	2.98136
1672	2.40669	2.43269	2.4279	2.43876	2.45454	2.4497	2.43584	2.43187	2.4572	2.46032	2.42924	2.45429	2.4619	2.46298	2.41898	2.39691	2.49776	2.50933	2.50962	2.47495	2.53587	2.54174	2.5906	2.54397	2.60457	2.60511	2.60437	2.59214	2.72096	2.68927	2.67036	2.68635	2.96527	2.93767	2.93367	2.95912
1674	2.41349	2.43694	2.43781	2.46064	2.47125	2.4781	2.45681	2.44544	2.47321	2.47729	2.45186	2.47379	2.48469	2.46954	2.44846	2.42334	2.51664	2.52241	2.52774	2.50362	2.5461	2.54384	2.61111	2.55402	2.60263	2.61039	2.60585	2.58807	2.70259	2.6917	2.66375	2.6812	2.93047	2.90064	2.89507	2.92459
1676	2.42832	2.44644	2.4534	2.4908	2.49742	2.50524	2.47495	2.46053	2.48579	2.49385	2.46796	2.49145	2.51071	2.4766	2.47388	2.44486	2.5376	2.53393	2.54717	2.52291	2.5538	2.54765	2.62666	2.55969	2.59569	2.60584	2.60158	2.57396	2.69482	2.6921	2.67303	2.67633	2.9011	2.87462	2.86638	2.88293
1678	2.45773	2.47684	2.48061	2.51161	2.52868	2.52606	2.49377	2.48531	2.50482	2.51051	2.48935	2.50298	2.52393	2.49663	2.49048	2.46069	2.56336	2.54568	2.57439	2.54086	2.56553	2.56655	2.64598	2.57612	2.59996	2.61854	2.6082	2.5878	2.69633	2.68877	2.67524	2.66639	2.87496	2.85255	2.8413	2.85793
1680	2.47361	2.48731	2.49459	2.52565	2.545	2.54431	2.51672	2.49667	2.5245	2.52612	2.49415	2.51863	2.53207	2.50708	2.50659	2.47703	2.57522	2.55652	2.59684	2.5539	2.57686	2.56987	2.65315	2.58964	2.60541	2.63335	2.61481	2.60825	2.69107	2.65589	2.65752	2.65896	2.84711	2.82882	2.81858	2.83198
1682	2.48613	2.48807	2.50189	2.526	2.54808	2.55055	2.51984	2.50144	2.53121	2.52611	2.49038	2.52137	2.53422	2.50871	2.52017	2.49417	2.58147	2.57465	2.60505	2.5718	2.57131	2.55108	2.62849	2.58026	2.60662	2.6186	2.61233	2.59672	2.67669	2.63123	2.64404	2.64697	2.81261	2.7905	2.78469	2.79176
1684	2.49439	2.49173	2.50744	2.52043	2.5455	2.54417	2.51931	2.50458	2.53314	2.52447	2.49207	2.52067	2.53513	2.51712	2.52588	2.50797	2.57857	2.58263	2.60725	2.57423	2.56234	2.5429	2.61557	2.56705	2.60375	2.59807	2.60608	2.57897	2.65572	2.62877	2.63818	2.63548	2.7803	2.75899	2.75804	2.75447
1686	2.50231	2.49719	2.50535	2.52388	2.54585	2.539	2.52004	2.50978	2.53608	2.52842	2.50088	2.52571	2.54069	2.54208	2.53128	2.50811	2.57013	2.57635	2.61406	2.56555	2.55399	2.54034	2.61598	2.55898	2.58645	2.58429	2.58699	2.5677	2.64572	2.62522	2.63453	2.61757	2.73649	2.72068	2.72329	2.73026
1688	2.50197	2.49746	2.50505	2.53176	2.54118	2.53546	2.51914	2.50976	2.53752	2.53466	2.50702	2.53082	2.5438	2.55005	2.53159	2.49008	2.56606	2.57399	2.61516	2.56516	2.54675	2.5418	2.61915	2.55787	2.57002	2.57046	2.572	2.55904	2.64341	2.60468	2.62839	2.60879	2.7069	2.69654	2.69978	2.70944
1690	2.50279	2.49681	2.51485	2.53218	2.53494	2.53481	2.52499	2.51442	2.53843	2.54766	2.51457	2.53247	2.54527	2.54748	2.53734	2.48864	2.55829	2.57597	2.6047	2.57072	2.5409	2.54583	2.62635	2.56129	2.56726	2.56083	2.56851	2.55008	2.63336	2.59189	2.61619	2.59954	2.68041	2.67169	2.66809	2.67624
1692	2.49485	2.49603	2.51293	2.5335	2.53204	2.53492	2.53173	2.5163	2.53265	2.55148	2.51149	2.5321	2.54733	2.53985	2.53925	2.50173	2.55999	2.57923	2.59164	2.56955	2.53739	2.54289	2.62359	2.56153	2.5623	2.55173	2.56343	2.54111	2.61439	2.58121	2.58992	2.58574	2.65988	2.64775	2.64272	2.64929
1694	2.48106	2.4903	2.50567	2.53073	2.52798	2.5299	2.52428	2.5045	2.5217	2.52812	2.5061	2.51739	2.53361	2.5267	2.53535	2.49269	2.56457	2.57867	2.58901	2.56197	2.54246	2.53715	2.61242	2.55524	2.54409	2.53592	2.54492	2.53048	2.59409	2.56647	2.57285	2.56513	2.63064	2.61407	2.6093	2.61709
1696	2.46626	2.47667	2.4958	2.51711	2.5174	2.51798	2.50968	2.48724	2.50404	2.50676	2.49183	2.50162	2.51763	2.51823	2.52055	2.46959	2.55431	2.56728	2.58519	2.55551	2.53455	2.51991	2.59722	2.53984	2.52392	2.52513	2.53091	2.52003	2.56648	2.53436	2.54709	2.54253	2.5958	2.57886	2.57175	2.58424
1698	2.45393	2.46003	2.47418	2.49458	2.50686	2.50138	2.48598	2.47073	2.49235	2.48591	2.4732	2.48539	2.49528	2.50015	2.49383	2.46708	2.53497	2.53823	2.56507	2.54548	2.49346	2.4926	2.56644	2.50474	2.49481	2.50541	2.50428	2.49658	2.53998	2.50956	2.51936	2.5163	2.54821	2.53627	2.52197	2.5336
1700	2.44457	2.44124	2.4529	2.46959	2.48531	2.47446	2.46508	2.46512	2.48435	2.47452	2.46122	2.47335	2.47708	2.49158	2.47518	2.46821	2.52067	2.52552	2.54828	2.53142	2.4744	2.48473	2.55146	2.48878	2.47244	2.48583	2.48434	2.48035	2.51243	2.47599	2.48617	2.48473	2.51361	2.50006	2.49536	2.50114
1702	2.43064	2.4249	2.42831	2.4497	2.46331	2.45126	2.43894	2.45733	2.46704	2.46829	2.4494	2.45956	2.46328	2.48447	2.4563	2.45316	2.50742	2.51184	2.54226	2.50991	2.4653	2.47613	2.53413	2.47862	2.45065	2.45829	2.46057	2.45871	2.48854	2.46125	2.46973	2.45736	2.47786	2.46422	2.46981	2.47311
1704	2.40152	2.40802	2.40257	2.4282	2.43135	2.42719	2.42005	2.43581	2.44065	2.45689	2.42127	2.44562	2.4523	2.4536	2.43877	2.42554	2.48755	2.49317	2.51153	2.47615	2.45222	2.45377	2.51082	2.46019	2.43188	2.43404	2.43912	2.43344	2.46017	2.44751	2.44993	2.4381	2.45101	2.43816	2.43516	2.44687
1706	2.38117	2.3913	2.37915	2.41623	2.41497	2.40581	2.40288	2.41208	2.41419	2.43332	2.39708	2.42436	2.42814	2.4171	2.42113	2.39782	2.46279	2.46962	2.47381	2.44417	2.42562	2.42428	2.47719	2.43116	2.40692	2.40522	2.40557	2.39429	2.43125	2.42604	2.42135	2.4189	2.42776	2.4125	2.39691	2.40835
1708	2.35804	2.36549	2.35818	2.40254	2.40327	2.38754	2.38462	2.39073	2.39883	2.41364	2.37981	2.40338	2.40688	2.38955	2.3916	2.36739	2.42598	2.4391	2.44984	2.42282	2.40229	2.38746	2.45882	2.40472	2.38311	2.38457	2.37994	2.37158	2.40656	2.3907	2.38733	2.38388	2.39829	2.37716	2.36849	2.37734
1710	2.33335	2.34068	2.33954	2.37095	2.38286	2.37111	2.35472	2.36495	2.38235	2.38289	2.35971	2.36841	2.37507	2.35923	2.35999	2.33216	2.39695	2.40623	2.42172	2.39951	2.37422	2.35475	2.43836	2.37389	2.35677	2.3605	2.34945	2.34618	2.37885	2.34958	2.3493	2.35578	2.35741	2.34289	2.33818	2.34222
1712	2.29454	2.30466	2.31653	2.34117	2.35731	2.35142	2.32943	2.32256	2.3582	2.35005	2.32057	2.33598	2.34378	2.31968	2.32979	2.30161	2.37183	2.36191	2.38344	2.35479	2.34476	2.32246	2.39651	2.34714	2.32628	2.3373	2.31819	2.32004	2.34545	2.30751	2.31079	2.32618	2.31204	2.29536	2.29224	2.30538
1714	2.27596	2.2855	2.29272	2.304	2.32891	2.32947	2.29404	2.29132	2.32864	2.31536	2.29663	2.30075	2.31119	2.29303	2.30348	2.28157	2.3486	2.32172	2.35215	2.32361	2.30757	2.30422	2.35934	2.31355	2.29094	2.30953	2.28603	2.28809	2.31731	2.28788	2.28849	2.30194	2.27239	2.25884	2.25297	2.2638
1716	2.26034	2.27202	2.27206	2.277	2.29888	2.3079	2.27177	2.27435	2.30358	2.29136	2.27635	2.28122	2.29402	2.28271	2.27893	2.25727	2.31731	2.30099	2.3317	2.30417	2.28728	2.29111	2.3417	2.28274	2.27323	2.28643	2.27415	2.26636	2.28901	2.26886	2.26599	2.26898	2.24478	2.22545	2.2228	2.23355
1718	2.23853	2.24895	2.24857	2.25115	2.28066	2.27634	2.25367	2.25654	2.27344	2.26696	2.25266	2.2605	2.2752	2.26759	2.24649	2.21789	2.2879	2.28463	2.31411	2.28363	2.26429	2.26977	2.3235	2.25319	2.25184	2.25843	2.26082	2.24235	2.2501	2.22466	2.22718	2.23744	2.21583	2.1933	2.19571	2.20238
1720	2.20256	2.2028	2.21278	2.22804	2.25709	2.24683	2.22979	2.2203	2.23656	2.23949	2.21023	2.23684	2.2404	2.22661	2.20187	2.18803	2.2499	2.26335	2.2924	2.24458	2.23187	2.21383	2.28532	2.22526	2.21377	2.22542	2.21968	2.21143	2.20504	2.18425	2.19202	2.19198	2.17289	2.14875	2.15832	2.15963
1722	2.16748	2.17326	2.17558	2.19018	2.21011	2.21535	2.18913	2.19151	2.19965	2.20781	2.17944	2.20624	2.20184	2.19703	2.17186	2.16401	2.22248	2.24087	2.25312	2.22201	2.19627	2.18113	2.25232	2.20172	2.17716	2.19125	2.17908	2.18174	2.16494	2.15568	2.15246	2.16107	2.13281	2.11528	2.12309	2.11974
1724	2.13212	2.14262	2.13556	2.16415	2.17212	2.18355	2.14972	2.16479	2.17125	2.17784	2.14685	2.1785	2.1763	2.16578	2.14687	2.13673	2.19787	2.20503	2.2115	2.19992	2.16254	2.15716	2.21993	2.16864	2.14682	2.16121	2.15617	2.15216	2.134	2.12755	2.12328	2.1281	2.08995	2.08041	2.07385	2.08671
1726	2.105	2.11559	2.10706	2.13666	2.15052	2.14371	2.11733	2.14202	2.1426	2.15024	2.12094	2.14889	2.15218	2.13787	2.11792	2.09917	2.17384	2.17128	2.17998	2.16985	2.1343	2.13957	2.19239	2.1362	2.12205	2.13208	2.13384	2.12055	2.1033	2.08923	2.09344	2.10117	2.05828	2.04766	2.04055	2.05946
1728	2.08197	2.08891	2.08841	2.11461	2.13104	2.1181	2.09818	2.11005	2.1195	2.12195	2.09513	2.11669	2.12168	2.10884	2.08583	2.07977	2.149	2.13771	2.16324	2.12609	2.09937	2.11481	2.15943	2.10206	2.09404	2.09494	2.09983	2.07621	2.08335	2.06677	2.07107	2.07557	2.02952	2.0097	2.01113	2.02837
1730	2.07224	2.07871	2.07545	2.08816	2.10807	2.09728	2.08305	2.09239	2.099	2.10268	2.08354	2.09194	2.09858	2.0893	2.06973	2.06993	2.13272	2.12333	2.15449	2.10813	2.07327	2.10636	2.15298	2.08557	2.08068	2.07088	2.08226	2.05081	2.07298	2.05145	2.04833	2.05406	2.01107	1.99126	1.9915	2.00648
1732	2.05971	2.06682	2.06356	2.07621	2.09152	2.0848	2.06982	2.07053	2.08431	2.08434	2.069	2.07455	2.07819	2.06926	2.05937	2.05858	2.11277	2.11437	2.14121	2.09291	2.05273	2.09477	2.15476	2.07537	2.07576	2.05867	2.07646	2.03367	2.05317	2.03406	2.03458	2.02888	1.98763	1.97296	1.96958	1.9819
1734	2.0298	2.0384	2.04247	2.06048	2.07316	2.06651	2.05256	2.03473	2.06259	2.06064	2.04146	2.05658	2.05723	2.04775	2.03385	2.03177	2.09135	2.09503	2.11235	2.06695	2.03544	2.05706	2.13906	2.05417	2.05695	2.0428	2.06222	2.01596	2.01297	2.00617	2.01496	2.00097	1.95892	1.94151	1.93839	1.95682
1736	1.99817	2.00753	2.00741	2.02623	2.04612	2.03203	2.02116	1.99891	2.03258	2.02266	2.00979	2.02578	2.03063	2.01933	2.00095	1.99912	2.07122	2.05759	2.07863	2.03826	2.01456	2.00653	2.10551	2.01071	2.01064	2.00911	2.01846	1.99028	1.98277	1.98242	1.97881	1.97207	1.92062	1.90483	1.90169	1.92089
1738	1.96221	1.96501	1.9626	1.98933	2.00084	1.98891	1.99254	1.97048	2.00164	1.9876	1.96847	1.99821	2.00667	1.98992	1.97598	1.96849	2.03242	2.01651	2.0431	2.01489	1.99417	1.97118	2.04818	1.97672	1.97004	1.97794	1.97767	1.96951	1.96108	1.95144	1.93549	1.93514	1.88738	1.87862	1.88053	1.88874
1740	1.93924	1.93281	1.92747	1.95834	1.96853	1.95874	1.95712	1.943	1.97255	1.94785	1.93713	1.96165	1.9709	1.95835	1.95528	1.94254	1.99246	1.98289	2.01542	1.99373	1.95745	1.9413	1.98896	1.94595	1.93377	1.93433	1.92583	1.94125	1.93576	1.9159	1.90942	1.90593	1.85749	1.85412	1.85945	1.8506
1742	1.91624	1.90971	1.90212	1.93122	1.94101	1.93193	1.92638	1.92712	1.94599	1.92731	1.91272	1.93585	1.95188	1.92811	1.92665	1.91112	1.96932	1.97	1.99788	1.96961	1.93117	1.90851	1.97278	1.93489	1.91205	1.90946	1.90531	1.90788	1.90067	1.8777	1.88838	1.8798	1.83348	1.81743	1.82291	1.82509
1744	1.89366	1.89416	1.87736	1.902	1.91232	1.9083	1.89252	1.91208	1.9209	1.91505	1.89404	1.90995	1.93786	1.90815	1.90652	1.8864	1.95359	1.957	1.98098	1.94614	1.90331	1.88729	1.96202	1.92612	1.88855	1.89148	1.88859	1.86677	1.86908	1.85543	1.86668	1.85786	1.80728	1.78761	1.79145	1.79835
1746	1.86253	1.8713	1.85685	1.87906	1.88015	1.88613	1.86592	1.86861	1.89395	1.89779	1.866	1.88604	1.91113	1.89769	1.88628	1.86372	1.92731	1.93304	1.95134	1.91304	1.88572	1.87155	1.93425	1.89974	1.8689	1.86982	1.85754	1.84358	1.84508	1.83635	1.84723	1.82848	1.77657	1.75635	1.75996	1.77042
1748	1.84432	1.8505	1.83904	1.84905	1.85178	1.8529	1.83869	1.83441	1.86645	1.86854	1.85047	1.85482	1.86824	1.88012	1.85779	1.83331	1.90197	1.90517	1.909	1.88585	1.86596	1.85767	1.90516	1.86428	1.84431	1.83261	1.81909	1.82238	1.83165	1.81113	1.8299	1.80774	1.74796	1.73648	1.73672	1.74081
1750	1.82183	1.82087	1.82408	1.82756	1.82809	1.82679	1.82965	1.8131	1.84641	1.83755	1.83619	1.8335	1.83254	1.83907	1.82375	1.8058	1.87564	1.86617	1.87566	1.84772	1.83762	1.82871	1.86696	1.83425	1.80891	1.79812	1.79578	1.79647	1.81456	1.78288	1.80419	1.78525	1.72172	1.71696	1.71612	1.71339
1752	1.78063	1.7846	1.80371	1.80383	1.81188	1.80563	1.82307	1.78552	1.82043	1.80639	1.81242	1.81051	1.80384	1.8005	1.79885	1.77016	1.84128	1.83108	1.85028	1.81891	1.80441	1.79581	1.83972	1.80428	1.77784	1.76978	1.77529	1.76829	1.77484	1.73975	1.75203	1.75634	1.69759	1.69153	1.68941	1.68697
1754	1.73637	1.74107	1.75693	1.77735	1.79296	1.78532	1.78653	1.7429	1.7861	1.7729	1.77249	1.78038	1.77789	1.75799	1.76704	1.73967	1.79213	1.79855	1.82097	1.7843	1.75432	1.74932	1.81561	1.75558	1.73755	1.73755	1.74115	1.72174	1.73365	1.70875	1.72138	1.71447	1.66516	1.64935	1.63945	1.64222
1756	1.72255	1.72309	1.72319	1.73584	1.75751	1.7514	1.74113	1.72427	1.74885	1.74566	1.74326	1.74722	1.75379	1.73616	1.74804	1.72462	1.77024	1.78184	1.79377	1.76835	1.72251	1.7369	1.80117	1.73067	1.70982	1.71139	1.71369	1.69	1.70678	1.68482	1.69794	1.6864	1.64077	1.62496	1.61558	1.61295
1758	1.7092	1.7109	1.70311	1.70984	1.72957	1.72805	1.71614	1.7121	1.72158	1.7236	1.71496	1.72263	1.73977	1.72225	1.73174	1.71205	1.75808	1.76218	1.76908	1.75146	1.71595	1.73208	1.78353	1.72608	1.70059	1.69782	1.69407	1.67351	1.68273	1.66481	1.6718	1.66222	1.61848	1.60382	1.59848	1.59855
1760	1.67687	1.68232	1.67917	1.68242	1.70329	1.70119	1.69493	1.68922	1.69637	1.69925	1.68321	1.69891	1.72247	1.70054	1.70241	1.67925	1.73524	1.73804	1.7444	1.72348	1.70319	1.70165	1.75477	1.70703	1.68728	1.67984	1.67586	1.6604	1.65791	1.63671	1.6397	1.63626	1.59026	1.57747	1.57581	1.57702
1762	1.64426	1.6468	1.64656	1.64724	1.67197	1.66828	1.66042	1.65374	1.66831	1.66052	1.65267	1.66133	1.68935	1.66755	1.66086	1.64235	1.70856	1.70598	1.72111	1.6885	1.66347	1.65684	1.71035	1.66335	1.65445	1.64229	1.64567	1.635	1.63502	1.61756	1.61916	1.61082	1.55159	1.54837	1.54705	1.5351
1764	1.60968	1.61201	1.61141	1.61237	1.63244	1.6307	1.62809	1.62419	1.63625	1.63269	1.6222	1.63083	1.6539	1.62966	1.62878	1.61094	1.68378	1.67882	1.69446	1.65413	1.63492	1.62584	1.6733	1.63636	1.62725	1.6205	1.62212	1.61322	1.6096	1.59347	1.5963	1.58313	1.52535	1.52047	1.51951	1.51387
1766	1.58395	1.58769	1.58421	1.58957	1.59979	1.60374	1.59589	1.60013	1.6094	1.6086	1.59938	1.60291	1.6139	1.59182	1.60702	1.58747	1.65778	1.64982	1.66059	1.618	1.6108	1.59634	1.6373	1.6133	1.59894	1.60292	1.59492	1.58899	1.58308	1.56451	1.57015	1.56058	1.50331	1.49909	1.49639	1.49729
1768	1.55791	1.56454	1.56444	1.57	1.57084	1.57741	1.5744	1.56981	1.58353	1.58883	1.57377	1.58118	1.58961	1.56602	1.5775	1.56624	1.62484	1.61874	1.63345	1.57522	1.58505	1.56044	1.60959	1.5921	1.57209	1.57995	1.57512	1.56305	1.56004	1.53249	1.54573	1.53844	1.48175	1.48263	1.47816	1.47895
1770	1.54016	1.54663	1.54618	1.53991	1.55196	1.55127	1.5535	1.54509	1.56294	1.56698	1.55805	1.55494	1.57197	1.55083	1.54804	1.53977	1.59771	1.59139	1.61659	1.55551	1.55298	1.53502	1.59036	1.5717	1.54585	1.54585	1.55414	1.53262	1.54047	1.51849	1.52334	1.51842	1.46424	1.46838	1.46067	1.45797
1772	1.52119	1.52317	1.52853	1.52218	1.53563	1.53131	1.53592	1.51772	1.5462	1.54704	1.53954	1.5379	1.55639	1.53616	1.54047	1.51225	1.57193	1.56874	1.59134	1.55247	1.53678	1.51275	1.58064	1.54394	1.5191	1.52309	1.52579	1.51494	1.52003	1.5036	1.50355	1.48947	1.45202	1.44315	1.43584	1.44149
1774	1.50189	1.50207	1.50893	1.51236	1.52391	1.51511	1.51588	1.49649	1.52873	1.52509	1.51392	1.51995	1.53365	1.51953	1.53467	1.49171	1.55522	1.55087	1.56471	1.54113	1.52371	1.50335	1.56727	1.52167	1.49676	1.5009	1.49647	1.49759	1.49656	1.47315	1.4749	1.46993	1.43569	1.42306	1.41631	1.42578
1776	1.47804	1.47115	1.4768	1.50039	1.50673	1.49937	1.48995	1.47468	1.50094	1.49905	1.47475	1.49491	1.50558	1.48932	1.50513	1.47014	1.53739	1.52872	1.54253	1.50983	1.50367	1.49769	1.53515	1.5081	1.48233	1.47977	1.47842	1.47688	1.47374	1.44946	1.4525	1.4499	1.4086	1.39756	1.39565	1.40785
1778	1.45231	1.4496	1.45026	1.47792	1.47574	1.47786	1.46165	1.45514	1.46708	1.46765	1.45895	1.46487	1.47466	1.46278	1.46771	1.43141	1.52381	1.51467	1.5119	1.47584	1.48684	1.48751	1.516	1.4944	1.4703	1.45996	1.46328	1.45995	1.45478	1.4279	1.43215	1.42454	1.38925	1.37276	1.37473	1.38872
1780	1.42646	1.4263	1.42558	1.45216	1.4535	1.45477	1.43636	1.42931	1.44328	1.43807	1.4452	1.43807	1.44452	1.43397	1.42409	1.4041	1.50936	1.50159	1.48003	1.43262	1.47426	1.46748	1.50406	1.4758	1.45554	1.44312	1.44627	1.44498	1.43323	1.41088	1.4155	1.39193	1.36623	1.34039	1.34581	1.35867
1782	1.398	1.39723	1.39827	1.41644	1.42756	1.42425	1.41139	1.40219	1.41972	1.41624	1.41543	1.41495	1.42058	1.41229	1.40417	1.38925	1.4822	1.4831	1.45576	1.41637	1.4555	1.44737	1.48683	1.45347	1.43797	1.42503	1.42845	1.42654	1.40572	1.39072	1.39479	1.37016	1.34394	1.32366	1.3247	1.33738
1784	1.37385	1.37137	1.37585	1.39373	1.40917	1.40507	1.3864	1.37548	1.40011	1.39936	1.3863	1.39392	1.39777	1.38656	1.38769	1.37393	1.44921	1.45351	1.442	1.40689	1.40867	1.42115	1.45902	1.41889	1.40222	1.39354	1.40082	1.39098	1.38894	1.37265	1.38011	1.35158	1.32053	1.3112	1.30465	1.31717
1786	1.3581	1.36284	1.36463	1.3744	1.38892	1.38432	1.37235	1.36164	1.38669	1.38573	1.37614	1.37972	1.38286	1.36983	1.37015	1.35707	1.42532	1.42477	1.425	1.39602	1.38486	1.38773	1.43234	1.39374	1.37738	1.36935	1.37341	1.37018	1.3716	1.35109	1.36315	1.3374	1.30833	1.30644	1.30409	1.30078
1788	1.34323	1.35244	1.35093	1.36044	1.37207	1.36453	1.36453	1.34718	1.36896	1.36382	1.36669	1.36372	1.36941	1.35121	1.35182	1.33979	1.40502	1.3935	1.40752	1.37933	1.36881	1.35911	1.40416	1.36634	1.36017	1.34783	1.33923	1.35332	1.34786	1.33411	1.33752	1.32302	1.29487	1.29739	1.30168	1.28158
1790	1.31206	1.32609	1.33097	1.34613	1.35351	1.34174	1.35046	1.32317	1.34251	1.34303	1.3404	1.34264	1.35467	1.3249	1.32348	1.31882	1.38306	1.36834	1.38692	1.34745	1.3526	1.333	1.37769	1.34533	1.33587	1.33051	1.32548	1.33384	1.32582	1.31572	1.31375	1.29839	1.27546	1.26522	1.2725	1.26567
1792	1.29877	1.3143	1.30968	1.32337	1.32942	1.31651	1.32156	1.3098	1.31106	1.32241	1.32399	1.3128	1.33035	1.30549	1.3026	1.29815	1.36588	1.34961	1.35849	1.32647	1.3324	1.31571	1.35998	1.32636	1.30797	1.31213	1.31454	1.30956	1.31692	1.30321	1.30342	1.28805	1.25632	1.24693	1.251	1.24788
1794	1.29457	1.30531	1.29409	1.3058	1.30227	1.29875	1.30629	1.30191	1.29283	1.31143	1.31194	1.30044	1.3153	1.29037	1.28939	1.28106	1.34376	1.34159	1.33806	1.30785	1.30964	1.30272	1.35222	1.30553	1.30085	1.29552	1.2996	1.29385	1.30998	1.29216	1.29704	1.28319	1.24978	1.24181	1.24444	1.23694
1796	1.28598	1.29311	1.28366	1.28762	1.2963	1.2924	1.2937	1.29253	1.29132	1.30033	1.30405	1.29068	1.30229	1.2789	1.27908	1.26894	1.32755	1.32852	1.32077	1.29484	1.28805	1.29138	1.34939	1.28685	1.29423	1.27667	1.28321	1.2753	1.29707	1.2741	1.27995	1.27219	1.24545	1.23598	1.23689	1.22701
[truncated: 352 more rows]
